# Supplementary material for: miR-195-5p Regulates Hair Follicle Inductivity of Dermal Papilla Cells by Suppressing Wnt/β-Catenin Activation
Source: Biomed Res Int. 2018 Apr 22;2018:4924356. doi: 10.1155/2018/4924356 (PMC5937601; doi:10.1155/2018/4924356)
Supplement: Supplementary 1 — Table S1: miRNA expression profiling data. [file 4924356.f1.xls]

## Sheet: Expression Matrix
# This page contains an expression matrix for all 6 slides. # Column "Name": the name of each miRNA. # Column "ID": array ID of the probes, each miRNA always has its unique probe, but some miRNAs may have two different probes. # Column "Fold change": the ratio of normalized intensities between two conditions (use normalized data, ratio scale). # Column "P-value": T-test result between samples in …
		Fold change	P-value	ForeGround						ForeGround-BackGround								Normalized								CV-value
ID	Name	exp vs con	exp vs con	DP10-a	DP10-b	DP10-c	DP4-a	DP4-b	DP4-c	DP10-a	DP10-b	DP10-c	DP4-a	DP4-b	DP4-c	Mean of con group	Mean of exp group	DP10-a	DP10-b	DP10-c	DP4-a	DP4-b	DP4-c	Mean of con group	Mean of exp group	con group	exp group
13138	Hy3	0.555913	0.208065	123	269	163	141	131	117.5	60	155.5	95	63.5	65	53	103.5	60.5	0.319149	0.863889	0.484694	0.35376	0.329114	0.24424	0.555911	0.309038	0.502357	0.185913
42638	hsa-miR-23a-5p	0.693046	0.321352	127	221.5	119.5	155	145.5	116.5	63	99.5	49	65	41	47.5	70.5	51.1667	0.335106	0.552778	0.25	0.362117	0.207595	0.218894	0.379295	0.262869	0.411687	0.327681
42888		0.445606	0.053128	2029.5	3567.5	2270	1151.5	1248.5	1464	1966.5	3443	2201.5	1062	1152.5	1397	2537	1203.83	10.4601	19.1278	11.2321	5.91643	5.83544	6.43779	13.6067	6.06322	0.352545	0.0539155
17519	ebv-miR-BART1-3p	1.73427	0.410779	95.5	145	85	148	115	80	29	18.5	15.5	65	29.5	15.5	21	36.6667	0.154255	0.102778	0.0790816	0.362117	0.149367	0.0714286	0.112038	0.194304	0.343034	0.774374
17278		0.201469	0.229644	87	178	82	100.5	79	69	22.5	48	13	10.5	-8	0.5	27.8333	1	0.119681	0.266667	0.0663265	0.0584958	N/A	0.00230415	0.150891	0.0304	0.687598	1.30702
46507	hsa-miR-921	1.67194	0.236015	99	125.5	93.5	127	108.5	100	33.5	2.5	22.5	32	37	32	19.5	33.6667	0.178191	0.0138889	0.114796	0.178273	0.187342	0.147465	0.102292	0.171027	0.810052	0.122217
17928	hsa-miR-181a-2-3p	1.38713	0.0360059	145.5	230.5	146	201.5	191	215	79.5	100.5	74.5	108.5	122.5	144	84.8333	125	0.422872	0.558333	0.380102	0.604457	0.620253	0.663594	0.453769	0.629435	0.205051	0.0486457
42826		0.226417	0.369702	273.5	2508	327.5	303	325	337.5	210	2384	261	206	233	266	951.667	235	1.11702	13.2444	1.33163	1.14763	1.17975	1.22581	5.23103	1.1844	1.32682	0.0331763
17537		0.380455	0.311272	100.5	215.5	102	120.5	101	93	36	91.5	31	25	-0.5	17	52.8333	13.8333	0.191489	0.508333	0.158163	0.139276	N/A	0.078341	0.285995	0.108808	0.67578	0.395993
42722		0.814171	0.768491	82	135.5	84	114	89.5	71	19.5	14	10	21	-4.5	2	14.5	6.16667	0.103723	0.0777778	0.0510204	0.116992	N/A	0.00921659	0.0775072	0.0631041	0.340001	1.20766
42645		0.898871	0.855669	98.5	191.5	79.5	138	102.5	96.5	32	63.5	11	48.5	18.5	34	35.5	33.6667	0.170213	0.352778	0.0561224	0.270195	0.0936709	0.156682	0.193038	0.173516	0.77518	0.51556
46636		1.30443	0.335671	866	580.5	463	936	759.5	788.5	801.5	452.5	393	844.5	673.5	725	549	747.667	4.2633	2.51389	2.0051	4.70474	3.41013	3.34101	2.92743	3.81863	0.404633	0.201164
11134	hsa-miR-502-5p	0.785403	0.553149	121	214.5	108.5	163.5	113	106.5	58	90.5	40	73	38.5	42.5	62.8333	51.3333	0.308511	0.502778	0.204082	0.406685	0.194937	0.195853	0.338457	0.265825	0.447865	0.45891
17295		0.884543	0.275571	812	1009	942.5	887	861.5	810.5	748	890.5	873.5	799	783	742.5	837.333	774.833	3.97872	4.94722	4.45663	4.45125	3.96456	3.42166	4.46086	3.94582	0.108558	0.130531
32825		0.70559	0.180249	139.5	241.5	153.5	156.5	151.5	133	76.5	120.5	83	66.5	78.5	63	93.3333	69.3333	0.406915	0.669444	0.423469	0.370474	0.397468	0.290323	0.499943	0.352755	0.294085	0.157977
46276		0.62907	0.448546	82	140	81.5	111	76	70	19	17	12	22.5	3.5	4	16	10	0.101064	0.0944444	0.0612245	0.125348	0.0177215	0.0184332	0.0855776	0.0538343	0.249464	1.15045
42812	hsa-miR-508-5p	1.76032	0.0244751	520	425	319.5	711	678.5	701	455.5	300.5	251.5	636	587.5	639	335.833	620.833	2.42287	1.66944	1.28316	3.54318	2.97468	2.9447	1.79183	3.15419	0.323484	0.106908
42918	hsa-miR-19b-2-5p	0.599677	0.54011	86	129.5	82	110	80.5	66	20	7	13	21	1.5	0.5	13.3333	7.66667	0.106383	0.0388889	0.0663265	0.116992	0.00759494	0.00230415	0.0705328	0.0422969	0.481238	1.53065
46457		0.364017	0.283541	91.5	191.5	83	111	81.5	70.5	28.5	69.5	12.5	25.5	12	3.5	36.8333	13.6667	0.151596	0.386111	0.0637755	0.142061	0.0607595	0.016129	0.200494	0.0729833	0.831138	0.874855
42469		1.60679	0.104819	104.5	115.5	92	151.5	129	114	41	-4	27	59.5	57.5	51	21.3333	56	0.218085	N/A	0.137755	0.331476	0.291139	0.235023	0.17792	0.28588	0.319255	0.169446
27575		1.17235	0.0939194	691	587	667	758	783	798	627.5	469	602	665	693	728	566.167	695.333	3.33777	2.60556	3.07143	3.70474	3.50886	3.35484	3.00492	3.52281	0.123334	0.0497798
46481		0.539004	0.137905	108	171.5	95	116.5	116	78	43.5	46	25	28.5	24.5	10.5	38.1667	21.1667	0.231383	0.255556	0.127551	0.158774	0.124051	0.0483871	0.20483	0.110404	0.332022	0.511256
29001	spike_control_v2_40	0.56714	0.0452263	1116.5	1248	811	700	628.5	631.5	1051	1128	743.5	623	561.5	556	974.167	580.167	5.59043	6.26667	3.79337	3.47075	2.84304	2.56221	5.21682	2.95867	0.24503	0.157225
42516	kshv-miR-K12-12-5p	1.91091	0.156446	139.5	173	117	242	194.5	158	76	47.5	47	157.5	87	90.5	56.8333	111.667	0.404255	0.263889	0.239796	0.877437	0.440506	0.417051	0.302647	0.578331	0.293466	0.448356
46752	hsa-miR-1270	0.648631	0.119803	112.5	177	117.5	132.5	128.5	93	45.5	54.5	48.5	45	31.5	22.5	49.5	33	0.242021	0.302778	0.247449	0.250696	0.159494	0.103687	0.264083	0.171292	0.127311	0.433246
46807		0.182294	0.32197	102	487.5	121	123	132	100.5	37.5	364	50.5	34.5	24	30	150.667	29.5	0.199468	2.02222	0.257653	0.192201	0.121519	0.138249	0.826448	0.150656	1.25353	0.245182
46427	hsa-miR-1248	0.414559	0.0353822	159.5	244	145	130	161	98.5	94.5	123	74	42	54.5	30	97.1667	42.1667	0.50266	0.683333	0.377551	0.233983	0.275949	0.138249	0.521181	0.216061	0.294965	0.326659
42821		0.55787	0.171671	98	162.5	86	112	103.5	78.5	32.5	40.5	19.5	25.5	14	14	30.8333	17.8333	0.172872	0.225	0.0994898	0.142061	0.0708861	0.0645161	0.165787	0.0924878	0.380333	0.465465
46279		0.397412	0.311396	91.5	146.5	80.5	102	85.5	63	27.5	20	6.5	12	2	-2.5	18	3.83333	0.146277	0.111111	0.0331633	0.0668524	0.0101266	N/A	0.0968503	0.0384895	0.59772	1.04213
11052	hsa-miR-31-5p	0.677362	0.0292517	1130.5	1510.5	1444	1007.5	902	1054.5	1067.5	1382.5	1374	921	811	989.5	1274.67	907.167	5.67819	7.68056	7.0102	5.13092	4.10633	4.55991	6.78965	4.59905	0.150117	0.111635
42696	hsa-miR-943	0.637844	0.0683558	260	377.5	240.5	235.5	227	201.5	196	248.5	170	142	139.5	130.5	204.833	137.333	1.04255	1.38056	0.867347	0.791086	0.706329	0.601382	1.09682	0.699599	0.237844	0.135836
42754	hsa-miR-586	0.37592	0.208331	82	161.5	81.5	105	75	66.5	21.5	34	11.5	20	3.5	1.5	22.3333	8.33333	0.114362	0.188889	0.0586735	0.111421	0.0177215	0.00691244	0.120641	0.0453515	0.541559	1.26726
42632		0.527505	0.131501	92	172	93.5	110	88.5	79.5	30.5	45.5	23.5	23	19.5	12	33.1667	18.1667	0.162234	0.252778	0.119898	0.128134	0.0987342	0.0552995	0.178303	0.0940558	0.380709	0.389575
42818	hsa-miR-597-5p	1.33798	0.155637	682.5	701.5	412.5	810	818	810	620.5	575.5	343	721	714.5	738	513	724.5	3.30053	3.19722	1.75	4.01671	3.61772	3.40092	2.74925	3.67845	0.315329	0.0849149
42810	hsa-miR-149-5p	0.88268	0.617341	141	211	122.5	173.5	136	121	78.5	89.5	55.5	83	67	55.5	74.5	68.5	0.417553	0.497222	0.283163	0.462396	0.339241	0.25576	0.399313	0.352465	0.270938	0.294924
42591	hsa-miR-634	1.0523	0.831143	159	281	188	220	236.5	185.5	97	166	121	139.5	169.5	114.5	128	141.167	0.515957	0.922222	0.617347	0.777159	0.858228	0.52765	0.685176	0.721012	0.308615	0.23896
17585	ebv-miR-BART20-3p	1.82361	0.565568	81.5	124	71.5	115	75	67	20	1.5	4.5	25.5	5	-2	8.66667	9.5	0.106383	0.00833333	0.0229592	0.142061	0.0253165	N/A	0.0458918	0.0836889	1.1526	0.986404
42848	hsa-miR-1180-3p	0.515233	0.0804236	109	165	101	120	90	82.5	43.5	44	34.5	34	18	12	40.6667	21.3333	0.231383	0.244444	0.17602	0.189415	0.0911392	0.0552995	0.217283	0.111951	0.167183	0.62025
17506	hsa-miR-24-3p	1.27896	0.484582	8933	3934.5	15839	9742.5	14387.5	13980.5	8869.5	3814.5	15769.5	9647.5	14314.5	13913.5	9484.5	12625.2	47.1782	21.1917	80.4566	53.7465	72.4785	64.1175	49.6088	63.4475	0.598828	0.147901
42919		0.578924	0.270776	90	154.5	83.5	112	80.5	73	26	32	16	25.5	11.5	6.5	24.6667	14.5	0.138298	0.177778	0.0816327	0.142061	0.0582278	0.0299539	0.132569	0.0767477	0.364548	0.759673
42937		0.629403	0.298975	95.5	146	93	123	93	74.5	32	30.5	25.5	32	20	3.5	29.3333	18.5	0.170213	0.169444	0.130102	0.178273	0.101266	0.016129	0.156586	0.0985559	0.146496	0.822943
42795	kshv-miR-K12-3-5p	1.22773	0.231655	364.5	309	300	403.5	363.5	397.5	301	182.5	230	314	275.5	327	237.833	305.5	1.60106	1.01389	1.17347	1.7493	1.39494	1.50691	1.26281	1.55038	0.240425	0.116835
42485	ebv-miR-BART10-5p	0.423609	0.17738	98.5	175	93	122	84	76	36.5	53.5	23.5	33.5	7	8	37.8333	16.1667	0.194149	0.297222	0.119898	0.18663	0.035443	0.0368664	0.203756	0.086313	0.43705	1.00656
11271		0.795168	0.479199	106.5	192.5	103	130.5	98	112.5	41.5	67	32	42.5	31.5	44.5	46.8333	39.5	0.220745	0.372222	0.163265	0.236769	0.159494	0.205069	0.252077	0.200444	0.42822	0.193793
46633	hsa-miR-1267	0.371485	0.158547	99.5	179	90	109.5	89.5	75	36.5	61.5	20	26	10	9	39.3333	15	0.194149	0.341667	0.102041	0.144847	0.0506329	0.0414747	0.212619	0.0789848	0.56851	0.724465
-1		0.908089	0.687843	1047	1638	945	1196	1245	1116	983	1518	873	1115	1073	1043	1124.67	1077	5.22872	8.43333	4.45408	6.2117	5.43291	4.80645	6.03871	5.48369	0.349356	0.12838
42896	hsa-miR-450b-5p	0.872641	0.0846465	172	238	190.5	175	211	173	109	112.5	119.5	89	116.5	108	113.667	104.5	0.579787	0.625	0.609694	0.495822	0.589873	0.497696	0.604827	0.527797	0.0380207	0.101872
42685		0.487686	0.12046	96.5	156.5	87	104	120	81	33	36.5	16.5	18.5	16	9	28.6667	14.5	0.175532	0.202778	0.0841837	0.103064	0.0810127	0.0414747	0.154164	0.0751838	0.402929	0.415059
28480	hsa-miR-504-5p	0.849651	0.38974	94.5	145.5	98.5	113.5	103.5	103.5	30.5	22	30.5	23.5	17.5	33.5	27.6667	24.8333	0.162234	0.122222	0.155612	0.130919	0.0886076	0.154378	0.14669	0.124635	0.146203	0.267441
42681	hsa-miR-1307-3p	0.649608	0.188207	173.5	185	136.5	137.5	155	120.5	108	52	66.5	50	51.5	52.5	75.5	51.3333	0.574468	0.288889	0.339286	0.278552	0.260759	0.241935	0.400881	0.260416	0.380233	0.0703124
42610	hcmv-miR-UL36-3p	0.366284	0.0845723	97.5	171	93	112	89	73.5	35.5	46	22	23	9.5	6	34.5	12.8333	0.18883	0.255556	0.112245	0.128134	0.0481013	0.0276498	0.185543	0.0679616	0.386496	0.781389
10919	hsa-miR-103a-3p	1.20841	0.579085	1341	492.5	1834	1305.5	1529	1694	1277.5	370.5	1762.5	1220	1436	1627	1136.83	1427.67	6.79521	2.05833	8.99235	6.79666	7.27089	7.4977	5.94863	7.18841	0.595713	0.0497637
17388		0.551652	0.193544	107.5	174	95	118	100	86	45.5	58	24	32	25.5	15.5	42.5	24.3333	0.242021	0.322222	0.122449	0.178273	0.129114	0.0714286	0.228897	0.126272	0.439197	0.423522
42767		0.502043	0.26452	86.5	187.5	89.5	100.5	92.5	92	25	58.5	19	14.5	19.5	21.5	34.1667	18.5	0.132979	0.325	0.0969388	0.0807799	0.0987342	0.0990783	0.184972	0.0928642	0.662795	0.112709
11021		0.558972	0.366261	81.5	136	79	100	77.5	69	20	12.5	9	17	3.5	2.5	13.8333	7.66667	0.106383	0.0694444	0.0459184	0.0947075	0.0177215	0.0115207	0.0739153	0.0413166	0.412354	1.12163
46541	hsa-miR-1225-5p	0.479477	0.0367723	108	170	98	112.5	92	80.5	43.5	41.5	31.5	24	23	10.5	38.8333	19.1667	0.231383	0.230556	0.160714	0.133705	0.116456	0.0483871	0.207551	0.0995158	0.19544	0.453304
5250	hsa-miR-105-5p	0.451792	0.202623	94.5	157	82.5	115.5	75	73.5	33	34	15.5	26.5	4.5	6.5	27.5	12.5	0.175532	0.188889	0.0790816	0.147632	0.0227848	0.0299539	0.147834	0.0667903	0.405284	1.0496
42734	hsa-miR-2110	0.58338	0.262208	94	147	85	120.5	81.5	77	31.5	33	18	29	10	10	27.5	16.3333	0.167553	0.183333	0.0918367	0.16156	0.0506329	0.0460829	0.147574	0.0860919	0.331432	0.759616
46518		1.24558	0.580638	337.5	333.5	155.5	412	264	279	275	213	90	339	192.5	218	192.667	249.833	1.46277	1.18333	0.459184	1.88858	0.974684	1.00461	1.03509	1.28929	0.500392	0.402714
42665		0.473147	0.0530131	117	185	107.5	124	97.5	83	52	67	45.5	37.5	26.5	16	54.8333	26.6667	0.276596	0.372222	0.232143	0.208914	0.134177	0.0737327	0.293654	0.138941	0.243759	0.487374
46923		0.480601	0.356169	281.5	1604	742	349	467.5	693.5	218	1486	674.5	255	370	626	792.833	417	1.15957	8.25556	3.44133	1.42061	1.87342	2.88479	4.28549	2.05961	0.845301	0.363971
46411	hsa-miR-1203	0.30877	0.13314	85.5	147.5	78.5	100.5	77.5	72	22	31.5	9	11.5	7.5	0.5	20.8333	6.5	0.117021	0.175	0.0459184	0.0640669	0.0379747	0.00230415	0.112647	0.0347819	0.573936	0.891409
46747	hsa-miR-1263	0.620746	0.437685	89.5	157.5	77	115	84.5	81	27.5	42.5	8	25	13	12.5	26	16.8333	0.146277	0.236111	0.0408163	0.139276	0.0658228	0.0576037	0.141068	0.0875674	0.692939	0.513535
146183		0.771469	0.548507	83.5	140	82.5	112.5	79	69.5	22.5	24.5	15	22.5	9	-1	20.6667	10.1667	0.119681	0.136111	0.0765306	0.125348	0.0455696	N/A	0.110774	0.0854589	0.277796	0.660106
146190	hsa-miR-3927-3p	0.766333	0.694894	79.5	139	79	115	77	68.5	16	20	11.5	27.5	6.5	2	15.8333	12	0.0851064	0.111111	0.0586735	0.153203	0.0329114	0.00921659	0.0849637	0.0651104	0.308592	1.18576
146013		0.425536	0.0628499	101.5	180	97.5	112.5	90	79.5	39.5	58.5	32	24	20	13.5	43.3333	19.1667	0.210106	0.325	0.163265	0.133705	0.101266	0.062212	0.232791	0.0990608	0.357486	0.361367
146061	hsa-miR-1914-3p	0.367861	0.0199718	93	153	86.5	97	88	73	26	31	20.5	11.5	12.5	5.5	25.8333	9.83333	0.138298	0.172222	0.104592	0.0640669	0.0632911	0.0253456	0.138371	0.0509012	0.244382	0.434866
25557	spike_control_v2_17	0.498641	0.127475	9461.5	15749	7397.5	6378	5460	5385.5	9396	15630	7324	6292	5389.5	5319	10783.3	5666.83	49.9787	86.8333	37.3673	35.0529	27.2886	24.5115	58.0598	28.951	0.442717	0.188725
28568	spike_control_v2_35	0.488392	0.177467	661.5	1192	468	447.5	422.5	413	598.5	1070.5	401.5	373.5	352	346.5	690.167	357.333	3.18351	5.94722	2.04847	2.08078	1.78228	1.59677	3.7264	1.81994	0.538126	0.134175
146060		0.3102	0.337409	363.5	2241.5	509.5	376.5	409	456	299.5	2119.5	437.5	293	282.5	385.5	952.167	320.333	1.59309	11.775	2.23214	1.63231	1.43038	1.7765	5.20008	1.61306	1.09672	0.107783
145658		0.449801	0.387417	511.5	3201.5	998.5	593.5	889.5	968.5	450	3074.5	923.5	503.5	775	900.5	1482.67	726.333	2.39362	17.0806	4.71173	2.80501	3.92405	4.14977	8.06197	3.62628	0.979396	0.198588
146079		0.321478	0.0705913	95.5	161.5	87	104	93.5	71	31	30.5	13	12.5	8.5	3.5	24.8333	8.16667	0.164894	0.169444	0.0663265	0.0696379	0.043038	0.016129	0.133555	0.042935	0.436269	0.623142
146199		0.657664	0.0450369	176.5	288	203.5	163	192.5	178	113	158	132.5	78	93.5	110.5	134.5	94	0.601064	0.877778	0.67602	0.43454	0.473418	0.509217	0.718287	0.472392	0.199248	0.079063
146138	hsa-miR-1909-5p	0.440063	0.152548	87.5	142.5	90	103.5	78.5	71.5	25	18.5	19.5	16	-12	2	21	2	0.132979	0.102778	0.0994898	0.0891365	N/A	0.00921659	0.111749	0.0491765	0.165183	1.14916
146177		1.4368	N/A	80	128	71	97.5	74	67	17	4	3	11	-2.5	-4.5	8	1.33333	0.0904255	0.0222222	0.0153061	0.0612813	N/A	N/A	0.0426513	0.0612813	0.973428	N/A
146117	hsv1-miR-H6-3p	1.19459	0.6738	681	245.5	987	663	920.5	692.5	617.5	125	916.5	575	840.5	625	553	680.167	3.28457	0.694444	4.67602	3.20334	4.2557	2.88018	2.88501	3.44641	0.700391	0.208695
146028		0.481999	0.105981	90	151.5	88	107.5	81	74	28	35.5	22	23.5	10.5	8	28.5	14	0.148936	0.197222	0.112245	0.130919	0.0531646	0.0368664	0.152801	0.07365	0.278927	0.682438
146212		0.438795	0.136513	91	146	86	107.5	80	72	29.5	33	18.5	22.5	12	1	27	11.8333	0.156915	0.183333	0.0943878	0.125348	0.0607595	0.00460829	0.144879	0.063572	0.315285	0.950404
146209		1.15767	0.352859	300	485.5	397.5	407.5	510.5	452.5	235.5	365.5	327.5	329	418.5	387	309.5	378.167	1.25266	2.03056	1.67092	1.83287	2.11899	1.78341	1.65138	1.91176	0.235752	0.0947631
28393	spike_control_v2_32	0.540596	0.000859274	1798.5	2026	2077	1159	1137	1128	1733	1904.5	2008.5	1069.5	1066	1060.5	1882	1065.33	9.21809	10.5806	10.2474	5.95822	5.39747	4.8871	10.0154	5.41426	0.0709178	0.0989531
146220		1.69816	0.138207	116	150	154	189	187.5	147.5	53.5	28.5	88.5	96	122	79.5	56.8333	99.1667	0.284574	0.158333	0.451531	0.534819	0.617722	0.366359	0.298146	0.5063	0.493278	0.252982
10902	hsa_negative_control_7	1.86772	N/A	76.5	123	75.5	102	67	63	11.5	3.5	7	13	-1.5	-5	7.33333	2.16667	0.0611702	0.0194444	0.0357143	0.0724234	N/A	N/A	0.0387763	0.0724234	0.54236	N/A
146055		1.45815	0.167051	503.5	302	483.5	635.5	677	524	440	185.5	416.5	540	574.5	455	347.333	523.167	2.34043	1.03056	2.125	3.00836	2.90886	2.09677	1.83199	2.67133	0.383393	0.187196
29146	spike_control_v2_43	0.758712	0.645832	3320.5	200.5	3177	1724	1878.5	1646.5	3259	73.5	3112	1628.5	1809.5	1578.5	2148.17	1672.17	17.3351	0.408333	15.8776	9.07242	9.16203	7.27419	11.207	8.50288	0.837001	0.125254
145831	hsa-miR-625-5p	0.80591	0.257883	90.5	154.5	102	121	100.5	100.5	28	37	36	33	22.5	29.5	33.6667	28.3333	0.148936	0.205556	0.183673	0.183844	0.113924	0.135945	0.179388	0.144571	0.159162	0.247278
145963	hsa-miR-646	2.24379	0.433598	68.5	117.5	66	99	73	65.5	8	0.5	1.5	11.5	3	-4	3.33333	3.5	0.0425532	0.00277778	0.00765306	0.0640669	0.0151899	N/A	0.0176613	0.0396284	1.22835	0.872134
145977	hsa-miR-1247-5p	0.559364	0.353465	137.5	334	138	161.5	148.5	131	76	215.5	70.5	73	79	63	120.667	71.6667	0.404255	1.19722	0.359694	0.406685	0.4	0.290323	0.653724	0.365669	0.72081	0.17868
145675	hsa-miR-501-5p	0.779818	0.55304	161	320	149.5	218.5	163.5	188.5	97.5	197	79.5	117	72.5	120.5	124.667	103.333	0.518617	1.09444	0.405612	0.651811	0.367089	0.5553	0.672891	0.524733	0.549007	0.275952
145838	hsa-miR-125b-1-3p	0.856356	0.353632	281	271	273	275	238.5	216	216.5	151.5	201.5	187	171	147.5	189.833	168.5	1.1516	0.841667	1.02806	1.04178	0.865823	0.679724	1.00711	0.862443	0.154922	0.209931
145953		0.138676	0.357672	109.5	720	111.5	125	95	111.5	45.5	597	36.5	41	16.5	45	226.333	34.1667	0.242021	3.31667	0.186224	0.228412	0.0835443	0.207373	1.2483	0.17311	1.43512	0.452176
145690	hsa-miR-512-5p	0.640713	0.329859	116	189.5	103.5	131.5	103.5	88	51	68.5	29	49	30	19	49.5	32.6667	0.271277	0.380556	0.147959	0.272981	0.151899	0.0875576	0.266597	0.170812	0.436497	0.551174
27968	spike_control_v2_29	0.676865	0.0542408	3245	2268	2799	2057	1973	1822	3178	2132	2709	1985	1904	1761	2673	1883.33	16.9043	11.8444	13.8214	11.0585	9.64051	8.11521	14.19	9.60474	0.179701	0.153255
145678	hsa-miR-150-5p	1.05807	0.759334	168.5	195.5	198	203.5	205.5	166	104	70.5	123.5	118	111	97	99.3333	108.667	0.553191	0.391667	0.630102	0.657382	0.562025	0.447005	0.524987	0.555471	0.231804	0.189644
145884		0.856215	0.0447139	132	186.5	148.5	148	147.5	138.5	69.5	64.5	80.5	62	62	68.5	71.5	64.1667	0.369681	0.358333	0.410714	0.345404	0.313924	0.315668	0.379576	0.324999	0.0725989	0.0544399
145715	hsa-miR-648	0.493241	0.262971	80.5	154	88.5	105.5	78.5	68.5	20.5	27.5	16	18	2.5	-1	21.3333	6.5	0.109043	0.152778	0.0816327	0.100279	0.0126582	N/A	0.114484	0.0564684	0.313435	1.0972
147199	hsa-miR-27b-3p	1.61924	0.268792	2878.5	408	4500.5	3431.5	4729	4684.5	2816	286.5	4430	3344.5	4649	4613	2510.83	4202.17	14.9787	1.59167	22.602	18.6323	23.5392	21.2581	13.0575	21.1432	0.814563	0.116136
147535	hsa-miR-4309	0.673172	0.62758	79.5	136.5	73.5	100.5	84	68	16.5	14.5	4.5	14.5	1	-1	11.8333	4.83333	0.087766	0.0805556	0.0229592	0.0807799	0.00506329	N/A	0.0637602	0.0429216	0.557059	1.24738
147892	hsa-miR-3152-3p	0.852137	0.723687	84	141.5	79.5	102.5	90	70.5	20.5	19.5	8.5	17.5	10	-1	16.1667	8.83333	0.109043	0.108333	0.0433673	0.097493	0.0506329	N/A	0.0869144	0.074063	0.433927	0.447391
147890		0.697284	0.230794	154	281.5	179	177	165	149	91.5	164	108.5	93.5	93.5	79.5	121.333	88.8333	0.486702	0.911111	0.553571	0.520891	0.473418	0.366359	0.650462	0.453556	0.350815	0.174526
147611	hsa-miR-4305	1.96402	0.0162884	104	173.5	99	172	145.5	156.5	40.5	53	29.5	89.5	78.5	87	41	85	0.215426	0.294444	0.15051	0.498607	0.397468	0.400922	0.220127	0.432332	0.327458	0.132818
147934		0.716418	0.460063	88.5	161	86	122	92.5	78	26.5	37.5	17	29.5	21.5	8.5	27	19.8333	0.140957	0.208333	0.0867347	0.164345	0.108861	0.0391705	0.145342	0.104126	0.419134	0.602366
147627	hsa-miR-4294	0.601666	0.329402	84	152.5	84	113	76	69.5	21	32	17.5	20	8	0	23.5	9.33333	0.111702	0.177778	0.0892857	0.111421	0.0405063	N/A	0.126255	0.0759635	0.364389	0.660106
147770	hsa-miR-4276	1.98148	N/A	75	115	69	103.5	69.5	68	12.5	-1.5	3.5	15	-4	-3.5	4.83333	2.5	0.0664894	N/A	0.0178571	0.0835655	N/A	N/A	0.0421733	0.0835655	0.815402	N/A
147165	hsa-let-7b-5p	1.461	0.221507	6405	2113	8213	7317.5	8588.5	9363	6342	1998.5	8145.5	7229	8515.5	9295	5495.33	8346.5	33.734	11.1028	41.5587	40.273	43.1165	42.8341	28.7985	42.0745	0.549211	0.0372327
147705	hsa-miR-4320	1.40459	0.371321	134.5	167.5	120	214	132	130.5	72.5	48.5	51	118.5	63	66.5	57.3333	82.6667	0.385638	0.269444	0.260204	0.660167	0.318987	0.306452	0.305096	0.428535	0.229124	0.468332
147848	hsa-miR-466	1.90514	0.463519	83	125.5	71	129.5	90.5	73.5	21.5	7.5	3.5	40	15.5	6.5	10.8333	20.6667	0.114362	0.0416667	0.0178571	0.222841	0.078481	0.0299539	0.0579618	0.110425	0.867356	0.908604
147900	hsv2-miR-H6-3p	0.883223	0.550572	223	384	271	294.5	236.5	278.5	162	261	201.5	208	163.5	209	208.167	193.5	0.861702	1.45	1.02806	1.15877	0.827848	0.963134	1.11325	0.983252	0.272409	0.169212
147891	hsa-miR-3175	0.944295	0.912754	2387.5	312.5	2895	1647.5	2353.5	1388	2328.5	194.5	2822	1558	2281	1320	1781.67	1719.67	12.3856	1.08056	14.398	8.67967	11.5494	6.08295	9.28805	8.77066	0.772903	0.31176
147873		0.836168	N/A	74	126.5	74	96	76.5	67.5	12	14.5	5	8.5	0	-1	10.5	2.5	0.0638298	0.0805556	0.0255102	0.0473538	N/A	N/A	0.0566318	0.0473538	0.498302	N/A
147186	hsa-miR-200b-3p	0.316783	0.188915	93	198.5	92	109	83.5	77.5	27.5	77	23.5	19	12.5	11	42.6667	14.1667	0.146277	0.427778	0.119898	0.10585	0.0632911	0.0506912	0.231317	0.0732773	0.737731	0.394438
147844		0.396945	0.159015	95	154.5	85.5	103.5	78.5	72	30.5	31	11	17.5	10	1.5	24.1667	9.66667	0.162234	0.172222	0.0561224	0.097493	0.0506329	0.00691244	0.130193	0.0516795	0.494197	0.876545
147283		0.112859	0.344798	109.5	846	131.5	118.5	98.5	110	43	718.5	56	32.5	26	42.5	272.5	33.6667	0.228723	3.99167	0.285714	0.181058	0.131646	0.195853	1.50203	0.169519	1.43557	0.198344
148231	hsa-miR-3918	0.492977	0.148395	93	153.5	84	101.5	85	75.5	28	33.5	14	17	14.5	7	25.1667	12.8333	0.148936	0.186111	0.0714286	0.0947075	0.0734177	0.0322581	0.135492	0.0667944	0.431844	0.475297
148635	hsa-miR-933	0.617309	0.443718	216.5	356.5	108.5	220.5	130.5	158.5	150.5	229.5	38.5	129.5	48.5	94.5	139.5	90.8333	0.800532	1.275	0.196429	0.721448	0.24557	0.435484	0.75732	0.467501	0.71381	0.512405
148660		0.900655	0.698874	189.5	242	145.5	209.5	171	146.5	125	116.5	76	127.5	87	82.5	105.833	99	0.664894	0.647222	0.387755	0.710306	0.440506	0.380184	0.566624	0.510332	0.273826	0.344461
147660	hsa-miR-4296	1.63503	N/A	77	128.5	76.5	96.5	75.5	71	14	5	3	11.5	-0.5	-1	7.33333	3.33333	0.0744681	0.0277778	0.0153061	0.0640669	N/A	N/A	0.039184	0.0640669	0.795904	N/A
147709	hsa-miR-3185	0.475512	0.211622	88.5	142.5	82	103.5	78.5	71.5	25.5	27	11	19.5	7	4	21.1667	10.1667	0.135638	0.15	0.0561224	0.108635	0.035443	0.0184332	0.11392	0.0541704	0.443879	0.884771
148251	hsa-miR-3689a-5p/hsa-miR-3689b-5p/hsa-miR-3689e	0.291059	0.310876	89.5	230	89.5	116	80.5	77.5	26.5	109.5	17.5	30.5	6	9.5	51.1667	15.3333	0.140957	0.608333	0.0892857	0.169916	0.0303797	0.0437788	0.279525	0.0813583	1.0229	0.946254
148599	hsa-miR-3680-5p	0.420741	0.261861	89.5	168.5	89.5	103	80.5	68	26	47	18.5	18.5	7	0	30.5	8.5	0.138298	0.261111	0.0943878	0.103064	0.035443	N/A	0.164599	0.0692536	0.525018	0.690438
148665	hsa-miR-510-5p	0.725562	0.598113	85	132	85	104.5	82	71	21	11.5	13	22.5	9	1	15.1667	10.8333	0.111702	0.0638889	0.0663265	0.125348	0.0455696	0.00460829	0.0806392	0.0585087	0.333943	1.04944
148363	hsa-miR-3652	0.646263	0.160194	95	159.5	91.5	114	93	82.5	31.5	38	23.5	27	18	17.5	31	20.8333	0.167553	0.211111	0.119898	0.150418	0.0911392	0.0806452	0.166187	0.107401	0.274521	0.350292
147703	hsa-miR-3181	0.516437	N/A	75.5	116	66.5	103	66	64.5	12.5	-2.5	-1.5	11.5	-5	1	2.83333	2.5	0.0664894	N/A	N/A	0.0640669	N/A	0.00460829	0.0664894	0.0343376	N/A	1.22442
148062	hsa-miR-3667-3p	0.478516	0.349949	81	124.5	75.5	96.5	71	63	17	6.5	6	4	5.5	-4	9.83333	1.83333	0.0904255	0.0361111	0.0306122	0.0222841	0.0278481	N/A	0.052383	0.0250661	0.631128	0.156958
148206	hsa-miR-3664-5p	0.95879	0.914538	88	154.5	85.5	126	89	81.5	24	32	17	36	21	15	24.3333	24	0.12766	0.177778	0.0867347	0.200557	0.106329	0.0691244	0.130724	0.125337	0.348818	0.540516
14257	spike_control_v1_i	1.39527	0.16652	103.5	146.5	94	137	110	109.5	37.5	27	24	49	42	37.5	29.5	42.8333	0.199468	0.15	0.122449	0.272981	0.212658	0.172811	0.157306	0.219483	0.248089	0.229777
0	Empty	N/A	N/A	63	117	65	74	67	64	0	-1	-1	-1	-1	-1	-0.666667	-1	N/A	N/A	N/A	N/A	N/A	N/A	N/A	N/A	N/A	N/A
148496		1.14962	0.854906	88	120.5	74	122.5	77.5	79	27	4.5	9.5	30	9	8	13.6667	15.6667	0.143617	0.025	0.0484694	0.167131	0.0455696	0.0368664	0.0723621	0.083189	0.868056	0.875429
148322		0.576483	0.125216	167.5	315.5	201.5	175	165	156	102.5	196.5	131	84	94.5	83	143.333	87.1667	0.545213	1.09167	0.668367	0.467967	0.478481	0.382488	0.768416	0.442979	0.373022	0.118853
148560		1.58821	0.147355	474.5	563.5	227.5	694.5	654.5	577.5	411.5	446	157	607	583	510	338.167	566.667	2.18883	2.47778	0.80102	3.38162	2.9519	2.35023	1.82254	2.89458	0.491831	0.178981
148185		3.46326	N/A	79.5	121	72	114	69	65	16.5	5	1	25	-1.5	-0.5	7.5	7.66667	0.087766	0.0277778	0.00510204	0.139276	N/A	N/A	0.0402153	0.139276	1.06209	N/A
148230		0.901374	0.774085	215.5	419.5	184	280.5	256	269	150.5	299	117.5	175.5	168	202	189	181.833	0.800532	1.66111	0.59949	0.977716	0.850633	0.930876	1.02038	0.919741	0.552661	0.0698772
148444		0.435724	0.181466	99	200.5	105	116	90	87	34	82.5	36	31	18.5	20	50.8333	23.1667	0.180851	0.458333	0.183673	0.172702	0.0936709	0.0921659	0.274286	0.119513	0.581131	0.385475
148164		0.355511	0.101022	75.5	131.5	79	98	72.5	68	10	14.5	7.5	8	1	2.5	10.6667	3.83333	0.0531915	0.0805556	0.0382653	0.0445682	0.00506329	0.0115207	0.0573375	0.0203841	0.374063	1.03961
148232		0.430701	0.0372917	88	142.5	88.5	95.5	80.5	71.5	24	20	14.5	10.5	10.5	5	19.5	8.66667	0.12766	0.111111	0.0739796	0.0584958	0.0531646	0.0230415	0.10425	0.0449006	0.263691	0.42577
148350		0.777861	0.359583	97	143.5	95	105.5	95.5	81	33	20	24	21	27	14	25.6667	20.6667	0.175532	0.111111	0.122449	0.116992	0.136709	0.0645161	0.136364	0.106072	0.252199	0.351784
148090		0.291083	0.331756	109.5	378	105	123	104.5	96.5	45	252	39.5	41.5	31.5	31.5	112.167	34.8333	0.239362	1.4	0.201531	0.231198	0.159494	0.145161	0.613631	0.178618	1.11024	0.258072
148142		0.305481	0.0947063	86.5	150.5	84	96.5	71.5	70	20	30.5	12.5	13	3	3.5	21	6.5	0.106383	0.169444	0.0637755	0.0724234	0.0151899	0.016129	0.113201	0.0345808	0.469637	0.947811
148022		0.454763	0.0804572	99	161.5	93.5	110	81.5	76.5	34.5	39.5	22	23	10.5	11.5	32	15	0.183511	0.219444	0.112245	0.128134	0.0531646	0.0529954	0.171733	0.0780979	0.317711	0.554847
148505		N/A	N/A	81	140	85	86.5	75.5	67.5	17.5	16.5	15	-2	-2	-0.5	16.3333	-1.5	0.0930851	0.0916667	0.0765306	N/A	N/A	N/A	0.0870941	N/A	0.105354	N/A
148152		0.739505	0.655018	79	135.5	76.5	101.5	73.5	67	15	10	7.5	14	1.5	0	10.8333	5.16667	0.0797872	0.0555556	0.0382653	0.0779944	0.00759494	N/A	0.0578694	0.0427947	0.360423	1.16323
148161		0.293023	0.0380229	89	150	82.5	105	80	69	24.5	28	14	9	8.5	2.5	22.1667	6.66667	0.130319	0.155556	0.0714286	0.0501393	0.043038	0.0115207	0.119101	0.0348993	0.362472	0.588992
148513		4.45125	N/A	66	111.5	68.5	96.5	64.5	60	2	-13.5	0	8.5	-7.5	-10	-3.83333	-3	0.0106383	N/A	N/A	0.0473538	N/A	N/A	0.0106383	0.0473538	N/A	N/A
148469		0.644685	N/A	79	123	80.5	95.5	70	66.5	16	-0.5	15.5	9.5	-4.5	0	10.3333	1.66667	0.0851064	N/A	0.0790816	0.0529248	N/A	N/A	0.082094	0.0529248	0.0518935	N/A
148203		1.04725	0.853142	123	147	139.5	147.5	134	126	61	28	69.5	60.5	56	55	52.8333	57.1667	0.324468	0.155556	0.354592	0.337047	0.283544	0.253456	0.278205	0.291349	0.385616	0.145319
148477		0.514274	0.273714	111.5	231.5	106	130	97.5	119	48.5	110.5	37.5	42.5	23	42	65.5	35.8333	0.257979	0.613889	0.191327	0.236769	0.116456	0.193548	0.354398	0.182258	0.64104	0.334395
148572		0.621744	0.218685	94	148	82.5	112	86.5	74.5	29.5	29	15.5	22	15	10.5	24.6667	15.8333	0.156915	0.161111	0.0790816	0.122563	0.0759494	0.0483871	0.132369	0.0822997	0.348994	0.455571
148333		3.22337	N/A	75	118.5	67.5	108.5	70.5	65.5	11.5	0.5	0	18.5	-5.5	-1	4	4	0.0611702	0.00277778	N/A	0.103064	N/A	N/A	0.031974	0.103064	1.29135	N/A
148391		2.53974	N/A	75.5	117	72	105	62	58.5	11	-2.5	1	14.5	-11.5	-9.5	3.16667	-2.16667	0.0585106	N/A	0.00510204	0.0807799	N/A	N/A	0.0318063	0.0807799	1.18736	N/A
148450		1.84273	0.0654652	168	174	153	274	216.5	200	104	51	85.5	181.5	142	133.5	80.1667	152.333	0.553191	0.283333	0.436224	1.01114	0.718987	0.615207	0.42425	0.781779	0.31898	0.262606
148306	hsa-miR-381-3p	0.674198	0.0203173	109	111.5	129.5	122	106	104.5	45.5	-2.5	57	31	35	41	33.3333	35.6667	0.242021	N/A	0.290816	0.172702	0.177215	0.18894	0.266419	0.179619	0.129508	0.0466639
148122		0.509998	0.407245	188.5	660.5	210.5	244.5	188.5	236.5	124	539	141.5	155	115.5	170	268.167	146.833	0.659574	2.99444	0.721939	0.86351	0.58481	0.78341	1.45865	0.74391	0.912075	0.192882
148150		3.40716	N/A	72	114	73	107.5	67	65	7.5	-3.5	5	20	-3	-1.5	3	5.16667	0.0398936	N/A	0.0255102	0.111421	N/A	N/A	0.0327019	0.111421	0.31101	N/A
148120		0.385629	0.20518	88.5	134	75.5	98	76	71.5	24.5	10	9	11	1	5	14.5	5.66667	0.130319	0.0555556	0.0459184	0.0612813	0.00506329	0.0230415	0.0772644	0.0297954	0.597931	0.96361
146024	hsa-miR-383-5p	0.428143	0.338513	92	151.5	77	103	75	67.5	26.5	28	8.5	17	-1	0.5	21	5.5	0.140957	0.155556	0.0433673	0.0947075	N/A	0.00230415	0.113293	0.0485058	0.53839	1.34703
42659		0.43854	0.210535	129	273	127.5	135	105	112	63.5	154	54.5	47	37.5	42	90.6667	42.1667	0.337766	0.855556	0.278061	0.261838	0.189873	0.193548	0.490461	0.215087	0.647528	0.188435
17287		0.238133	0.163585	92.5	148	85	93	76.5	70.5	28	27	9	9	-1	1	21.3333	3	0.148936	0.15	0.0459184	0.0501393	N/A	0.00460829	0.114952	0.0273738	0.520105	1.17613
11234		0.44053	0.0514911	88	142	89	92.5	77	73.5	22.5	13.5	17	12	4	8	17.6667	8	0.119681	0.075	0.0867347	0.0668524	0.0202532	0.0368664	0.0938052	0.041324	0.246941	0.571514
30442	hsa-miR-802	4.00512	0.381885	73	121	68	129	79.5	79.5	10.5	1	-3.5	46.5	8.5	14.5	2.66667	23.1667	0.0558511	0.00555556	N/A	0.259053	0.043038	0.0668203	0.0307033	0.12297	1.15832	0.963234
168574	hsa-miR-4428	0.858112	0.798837	69.5	119.5	73.5	97	66.5	67.5	5.5	2	4	5	-5.5	1.5	3.83333	0.333333	0.0292553	0.0111111	0.0204082	0.0278552	N/A	0.00691244	0.0202582	0.0173838	0.44787	0.85187
168970	hsa-miR-5590-5p	N/A	N/A	68	112.5	59.5	86.5	63.5	57	5	-11.5	-10.5	-1	-6.5	-10.5	-5.66667	-6	0.0265957	N/A	N/A	N/A	N/A	N/A	0.0265957	N/A	N/A	N/A
168938	hsa-miR-5692a	N/A	N/A	61	102	55.5	83.5	59	56.5	-3	-19.5	-12.5	-7	-9	-10.5	-11.6667	-8.83333	N/A	N/A	N/A	N/A	N/A	N/A	N/A	N/A	N/A	N/A
168825	hsa-miR-4729	0.485196	0.556402	88.5	122.5	72	102	74	61.5	26	-3	4.5	9.5	5	-5	9.16667	3.16667	0.138298	N/A	0.0229592	0.0529248	0.0253165	N/A	0.0806285	0.0391206	1.01151	0.499022
168640	hsa-miR-4475	1.33799	0.108625	291.5	455.5	309.5	450	428	529.5	231	335.5	241	343.5	346	459.5	269.167	383	1.22872	1.86389	1.22959	1.91365	1.7519	2.11751	1.44073	1.92769	0.254358	0.0950415
168874	hsa-miR-4535	0.993344	0.973333	89.5	139.5	83.5	105.5	96	90	25.5	16.5	15.5	18.5	17	25	19.1667	20.1667	0.135638	0.0916667	0.0790816	0.103064	0.0860759	0.115207	0.102129	0.101449	0.290754	0.144237
168656	hsa-miR-5002-3p	1.59853	0.00908876	747.5	759.5	784	972	1318	1398.5	686.5	638.5	718.5	876.5	1252	1333.5	681.167	1154	3.6516	3.54722	3.66582	4.88301	6.33924	6.14516	3.62154	5.78914	0.017881	0.136585
168838		0.821897	0.59408	28904	60175.5	28513.5	38102.5	33082.5	30599	28842.5	60053.5	28447	38014.5	33009.5	30526.5	39114.3	33850.2	153.418	333.631	145.138	211.78	167.137	140.675	210.729	173.197	0.505468	0.207496
168861	hsa-miR-4754	0.566221	0.490045	101.5	271	94.5	137	108	115	38.5	149	26	46.5	35	48.5	71.1667	43.3333	0.204787	0.827778	0.132653	0.259053	0.177215	0.223502	0.388406	0.219923	0.984054	0.186593
168667	hsa-miR-4999-3p	1.64245	N/A	72	122.5	63.5	109.5	80	69.5	6.5	-2.5	-3.5	20	8	4	0.166667	10.6667	0.0345745	N/A	N/A	0.111421	0.0405063	0.0184332	0.0345745	0.0567867	N/A	0.855561
168910	hsa-miR-4735-5p	1.10096	0.856895	81.5	157.5	73.5	125	86.5	84	20	33	6	33.5	15.5	19	19.6667	22.6667	0.106383	0.183333	0.0306122	0.18663	0.078481	0.0875576	0.106776	0.117556	0.715153	0.510321
168664	hsa-miR-5683	N/A	N/A	63	106	67	102	69	64	-0.5	-12	-1.5	8.5	0.5	-9	-4.66667	0	N/A	N/A	N/A	0.0473538	0.00253165	N/A	N/A	0.0249427	N/A	1.27067
168712		1.00417	0.99534	79.5	133.5	74	123.5	76	77	16	15.5	-1.5	31	10	7.5	10	16.1667	0.0851064	0.0861111	N/A	0.172702	0.0506329	0.0345622	0.0856087	0.0859657	0.0082988	0.878773
168766	hsa-miR-4772-5p	N/A	N/A	62.5	99.5	64.5	96.5	59	55	0	-19.5	-7.5	5	-10.5	-10.5	-9	-5.33333	N/A	N/A	N/A	0.0278552	N/A	N/A	N/A	0.0278552	N/A	N/A
168569	hsa-miR-5088-5p	0.217583	0.23211	77.5	126.5	71	91.5	76	68	14.5	13	2	2.5	0	2	9.83333	1.5	0.0771277	0.0722222	0.0102041	0.0139276	N/A	0.00921659	0.0531847	0.0115721	0.701386	0.287863
168608		1.55505	0.223824	84.5	130.5	88.5	113.5	98	88.5	23	4.5	20	26.5	26.5	23	15.8333	25.3333	0.12234	0.025	0.102041	0.147632	0.134177	0.105991	0.0831271	0.129267	0.61776	0.164393
168883	hsa-miR-3689d	1.87472	N/A	71	113	74	94	65.5	61	7.5	-11.5	1.5	8	-2.5	-12	-0.833333	-2.16667	0.0398936	N/A	0.00765306	0.0445682	N/A	N/A	0.0237733	0.0445682	0.958953	N/A
168669	hsa-miR-5693	0.387767	0.242626	78.5	141.5	70	97.5	70.5	68.5	14.5	19.5	-2.5	12	1	-1.5	10.5	3.83333	0.0771277	0.108333	N/A	0.0668524	0.00506329	N/A	0.0927305	0.0359578	0.237956	1.21508
168791	hsa-miR-4785	0.886222	N/A	70.5	117	67	89	66.5	59	6.5	-9.5	-2.5	5.5	-3	-9	-1.83333	-2.16667	0.0345745	N/A	N/A	0.0306407	N/A	N/A	0.0345745	0.0306407	N/A	N/A
168804	hsa-miR-4761-3p	N/A	N/A	78	116.5	78	82	65.5	65.5	13	-5.5	4	-2.5	-5	-2	3.83333	-3.16667	0.0691489	N/A	0.0204082	N/A	N/A	N/A	0.0447785	N/A	0.769675	N/A
169368	hsa-miR-3529-3p	1.36156	N/A	67	117.5	66	89	65.5	61	5	-4	-6	6.5	-9	-4.5	-1.66667	-2.33333	0.0265957	N/A	N/A	0.0362117	N/A	N/A	0.0265957	0.0362117	N/A	N/A
169178	hsa-miR-4665-5p	1.12146	N/A	76	125.5	73.5	93.5	71	65	12	5.5	0	9.5	0	-2	5.83333	2.5	0.0638298	0.0305556	N/A	0.0529248	N/A	N/A	0.0471927	0.0529248	0.498561	N/A
169221	hsa-miR-4748	0.932407	0.809345	78.5	127.5	71.5	98.5	82.5	73.5	14.5	10	0	15	11.5	9.5	8.16667	12	0.0771277	0.0555556	N/A	0.0835655	0.0582278	0.0437788	0.0663416	0.0618574	0.229928	0.32559
169076	hsa-miR-345-3p	0.280014	0.321159	158.5	420.5	88.5	155	95.5	95.5	91	298.5	20	68.5	26	25	136.5	39.8333	0.484043	1.65833	0.102041	0.381616	0.131646	0.115207	0.748139	0.20949	1.08411	0.712647
169346	hsa-miR-5195-3p	0.729762	0.718263	75	127	71	94.5	71.5	64.5	12	4	-1	9	2.5	-1	5	3.5	0.0638298	0.0222222	N/A	0.0501393	0.0126582	N/A	0.043026	0.0313988	0.683796	0.844081
169031	hsa-miR-4726-5p	0.613141	0.13304	2484	3790	2277	2138	1715	1772	2418	3667	2203	2052.5	1580	1700	2762.67	1777.5	12.8617	20.3722	11.2398	11.4345	8	7.8341	14.8246	9.08955	0.328668	0.22361
169276	hsa-miR-4474-3p	1.53099	N/A	78.5	120	72	99.5	66	61.5	14.5	5.5	3.5	11.5	-3.5	-1	7.83333	2.33333	0.0771277	0.0305556	0.0178571	0.0640669	N/A	N/A	0.0418468	0.0640669	0.745741	N/A
169170	hsa-miR-4472	0.629348	0.252381	173.5	284.5	137.5	179	126.5	136	109	162.5	70.5	92	59.5	75	114	75.5	0.579787	0.902778	0.359694	0.512535	0.301266	0.345622	0.614086	0.386474	0.444826	0.288251
169168	hsa-miR-5580-3p	0.739967	0.583445	86	154.5	76.5	112	83.5	83	24	35.5	7	24.5	13	14	22.1667	17.1667	0.12766	0.197222	0.0357143	0.13649	0.0658228	0.0645161	0.120199	0.0889431	0.673984	0.463018
169335	hsa-miR-4699-5p	0.688176	0.63048	81	180.5	80	115.5	83.5	100	17	65	10.5	27.5	12	29	30.8333	22.8333	0.0904255	0.361111	0.0535714	0.153203	0.0607595	0.133641	0.168369	0.115868	0.99741	0.420455
169043	hsa-miR-4462	0.450146	0.259594	83	131	70.5	94.5	74	69.5	18	11	3.5	8	4	3	10.8333	5	0.0957447	0.0611111	0.0178571	0.0445682	0.0202532	0.0138249	0.0582376	0.0262154	0.670068	0.618557
169136	hsa-miR-5006-3p	0.861848	0.682582	83	144	80	107.5	79	75	18.5	18.5	11	21	12.5	9	16	14.1667	0.0984043	0.102778	0.0561224	0.116992	0.0632911	0.0414747	0.0857682	0.0739191	0.300425	0.525765
169243	hsa-miR-3682-5p	0.414481	0.241581	90.5	161.5	83.5	114	71.5	74	25	43.5	15	26	1.5	7.5	27.8333	11.6667	0.132979	0.241667	0.0765306	0.144847	0.00759494	0.0345622	0.150392	0.0623346	0.558101	1.16658
169205	hsa-miR-4640-3p	0.32927	0.184634	94.5	191	91.5	115.5	76	80	30	73	24	26.5	6	10.5	42.3333	14.3333	0.159574	0.405556	0.122449	0.147632	0.0303797	0.0483871	0.229193	0.0754664	0.671305	0.8367
169078	hsa-miR-548ai/hsa-miR-570-5p	5.65571	N/A	69	101	60.5	102.5	57.5	60.5	2.5	-13.5	-14	13.5	-10.5	-9	-8.33333	-2	0.0132979	N/A	N/A	0.0752089	N/A	N/A	0.0132979	0.0752089	N/A	N/A
169130	hsa-miR-4764-3p	1.00057	0.998441	406	857.5	510	576.5	715.5	559	344	741.5	438	486	632	495	507.833	537.667	1.82979	4.11944	2.23469	2.70752	3.2	2.28111	2.72798	2.72954	0.447928	0.168469
169358	hsa-miR-4417	1.80344	0.179877	460	196.5	478	691	408.5	779	398	80	406	600.5	340.5	713	294.667	551.333	2.11702	0.444444	2.07143	3.3454	1.72405	3.28571	1.5443	2.78506	0.616962	0.330098
169278	hsa-miR-4525	0.625446	0.302539	87	148.5	86	106.5	78	72.5	21.5	26	17	19.5	7	0	21.5	8.83333	0.114362	0.144444	0.0867347	0.108635	0.035443	N/A	0.11518	0.0720391	0.250595	0.718424
169167	hsa-miR-4451	0.822241	0.671234	2229.5	477	1832	1373	1108.5	1414.5	2165.5	355.5	1762	1286.5	1016.5	1339.5	1427.67	1214.17	11.5186	1.975	8.9898	7.16713	5.14684	6.17281	7.49447	6.16226	0.659741	0.163932
169086	hsa-miR-4786-5p	0.816102	0.763843	70.5	117.5	74.5	89	72	61.5	7	-5.5	4.5	7	2	-5.5	2	1.16667	0.037234	N/A	0.0229592	0.0389972	0.0101266	N/A	0.0300966	0.0245619	0.335382	0.83115
168937		0.836761	0.732241	113	233.5	103.5	152.5	114	118.5	48.5	110.5	29	71	44	51	62.6667	55.3333	0.257979	0.613889	0.147959	0.395543	0.222785	0.235023	0.339942	0.28445	0.716412	0.338912
168555		0.373931	0.348889	82	129	74.5	89	66.5	66.5	16	6	4.5	5.5	-4	1	8.83333	0.833333	0.0851064	0.0333333	0.0229592	0.0306407	N/A	0.00460829	0.047133	0.0176245	0.706353	1.04444
168688		0.733565	0.251351	2646.5	4362.5	2755	2533	2628.5	2429.5	2582.5	4242	2686.5	2439	2556.5	2362.5	3170.33	2452.67	13.7367	23.5667	13.7066	13.5877	12.9443	10.8871	17.0033	12.473	0.334289	0.113096
169250		0.753614	0.347549	1990.5	4163	2871	2274.5	2539	2400.5	1927.5	4042.5	2803	2192.5	2466.5	2327.5	2924.33	2328.83	10.2527	22.4583	14.301	12.2145	12.4886	10.7258	15.6707	11.8096	0.396731	0.0803222
169398	hsa-miR-5096	0.748362	N/A	77.5	118.5	74	89	70	68	11	-5.5	7.5	6.5	-1.5	-1	4.33333	1.33333	0.0585106	N/A	0.0382653	0.0362117	N/A	N/A	0.048388	0.0362117	0.295851	N/A
169386	hsa-miR-4427	N/A	N/A	68	105	64	89.5	62.5	61	4.5	-24.5	-7.5	0	-12	-8.5	-9.16667	-6.83333	0.0239362	N/A	N/A	N/A	N/A	N/A	0.0239362	N/A	N/A	N/A
168607		0.794918	0.270995	807.5	1337	1027.5	888	911.5	906.5	745.5	1216	956.5	793	810	842.5	972.667	815.167	3.96543	6.75556	4.8801	4.41783	4.10127	3.88249	5.20036	4.13386	0.273513	0.0651095
168813		0.716077	0.547379	92.5	168.5	84	120.5	90.5	85	31	50	10.5	32	19.5	17	30.5	22.8333	0.164894	0.277778	0.0535714	0.178273	0.0987342	0.078341	0.165414	0.118449	0.677717	0.445782
28019	hsa-miR-10a-3p	1.0355	0.914979	157.5	179	160.5	217	144	137.5	91.5	53	91.5	118.5	62.5	68.5	78.6667	83.1667	0.486702	0.294444	0.466837	0.660167	0.316456	0.315668	0.415994	0.430764	0.254169	0.461203
28191	hsa-miR-30e-5p	1.5371	0.24007	533.5	232	691	571.5	811	817	465	115.5	619	466.5	719	738.5	399.833	641.333	2.4734	0.641667	3.15816	2.59889	3.64051	3.40323	2.09108	3.21421	0.622207	0.169849
42938		0.599694	0.595695	90	201.5	90	167	84	77	22	88	18.5	61	9	7.5	42.8333	25.8333	0.117021	0.488889	0.0943878	0.339833	0.0455696	0.0345622	0.233433	0.139988	0.948971	1.23695
42959	hsa-miR-514a-3p	0.941604	0.939736	135	128	106.5	186	84.5	94.5	70.5	14	35	80.5	12	18.5	39.8333	37	0.375	0.0777778	0.178571	0.448468	0.0607595	0.0852535	0.21045	0.19816	0.718241	1.09567
17411		1.80133	0.552587	98.5	132	94	192	91.5	85	30.5	13	19.5	84.5	14	13	21	37.1667	0.162234	0.0722222	0.0994898	0.470752	0.0708861	0.0599078	0.111315	0.200515	0.414646	1.16747
42678		47.1022	N/A	69.5	112	74	174	67.5	64.5	2.5	-3	0.5	67	-8	-10.5	0	16.1667	0.0132979	N/A	0.00255102	0.373259	N/A	N/A	0.00792445	0.373259	0.958953	N/A
46415	hsa-miR-548l	1.93333	0.600544	89.5	135.5	89	190	87.5	94.5	24.5	9.5	18	85	11	0.5	17.3333	32.1667	0.130319	0.0527778	0.0918367	0.473538	0.0556962	0.00230415	0.0916446	0.177179	0.423059	1.45637
42877		N/A	N/A	76.5	126.5	82	80	73.5	82	11.5	1.5	10.5	-2	-2.5	-22.5	7.83333	-9	0.0611702	0.00833333	0.0535714	N/A	N/A	N/A	0.041025	N/A	0.696298	N/A
42770		1.17565	0.645615	713.5	265	769	656.5	751	740.5	645.5	149.5	694.5	578	669	558	496.5	601.667	3.43351	0.830556	3.54337	3.22006	3.38734	2.57143	2.60248	3.05961	0.590019	0.140858
46558	hsa-miR-1268a/hsa-miR-1268b	0.600083	0.00697628	101	143	99.5	94.5	90	109.5	29.5	25	26.5	15.5	17	-31.5	27	0.333333	0.156915	0.138889	0.135204	0.086351	0.0860759	N/A	0.143669	0.0862135	0.0808666	0.00225571
42756	hsa-miR-548d-5p	0.442305	N/A	81	113.5	81.5	77.5	78.5	99.5	16	-5	8	-2	5.5	-43	6.33333	-13.1667	0.0851064	N/A	0.0408163	N/A	0.0278481	N/A	0.0629614	0.0278481	0.497413	N/A
42539		1.05988	0.869533	32933	7838.5	27496	26428	23215.5	25307.5	32864.5	7721.5	27422.5	26351	23136	24973.5	22669.5	24820.2	174.811	42.8972	139.911	146.802	117.144	115.085	119.206	126.344	0.573382	0.140468
17419	kshv-miR-K12-9-3p	N/A	N/A	67.5	112	74	75	66.5	92.5	1.5	-5	0.5	-2	-4.5	-71.5	-1	-26	0.00797872	N/A	0.00255102	N/A	N/A	N/A	0.00526487	N/A	0.728976	N/A
11260	hsa-miR-151a-5p	0.580976	0.0920451	295	419	434	275	314	278	231.5	309.5	362	198.5	242	99	301	179.833	1.23138	1.71944	1.84694	1.10585	1.22532	0.456221	1.59926	0.929129	0.203158	0.445453
31388		0.588538	0.197326	161.5	267	178	171	161	204	92.5	150	103.5	92	91	25.5	115.333	69.5	0.492021	0.833333	0.528061	0.512535	0.460759	0.117512	0.617805	0.363602	0.303527	0.590445
45985		0.324407	0.0878391	74	126.5	81	79	76.5	96	10	13	8	1	6	-66.5	10.3333	-19.8333	0.0531915	0.0722222	0.0408163	0.00557103	0.0303797	N/A	0.05541	0.0179754	0.285509	0.975913
28346		0.434128	0.345091	76	135.5	80.5	85	78	96.5	13.5	26	7	9	4.5	-59.5	15.5	-15.3333	0.0718085	0.144444	0.0357143	0.0501393	0.0227848	N/A	0.0839891	0.036462	0.65936	0.530484
42598	hsa-miR-452-3p	0.461216	0.0478435	75	106	80	79.5	76	102.5	12.5	-1.5	11.5	4	7	-55	7.5	-14.6667	0.0664894	N/A	0.0586735	0.0222841	0.035443	N/A	0.0625814	0.0288636	0.0883117	0.32237
31517	hsa-miR-561-3p	0.130012	N/A	76.5	113.5	78	69	70	86.5	15	8	10	-6	1.5	-64	11	-22.8333	0.0797872	0.0444444	0.0510204	N/A	0.00759494	N/A	0.0584174	0.00759494	0.321765	N/A
11113	hsa-miR-448	0.0486349	N/A	75	114.5	78	74	68.5	88	13.5	6	10	-3.5	0.5	-54	9.83333	-19	0.0718085	0.0333333	0.0510204	N/A	0.00253165	N/A	0.0520541	0.00253165	0.369969	N/A
14313	hsa-miR-499a-5p	0.861962	0.83503	88.5	156.5	90	150	84	72.5	23.5	38.5	18.5	51.5	13	4.5	26.8333	23	0.125	0.213889	0.0943878	0.286908	0.0658228	0.0207373	0.144426	0.124489	0.429797	1.1443
11181	hsa-miR-95-3p	2.67075	N/A	73.5	104.5	70.5	136.5	68	63.5	10	-18	-1	25.5	-6.5	-11	-3	2.66667	0.0531915	N/A	N/A	0.142061	N/A	N/A	0.0531915	0.142061	N/A	N/A
46510		1.09628	0.910241	87	153.5	91	170	81.5	79.5	24	33.5	21	67	11.5	6.5	26.1667	28.3333	0.12766	0.186111	0.107143	0.373259	0.0582278	0.0299539	0.140305	0.153814	0.29204	1.23897
17470	kshv-miR-K12-2-5p	1.70848	0.51034	94.5	151.5	86	191	92	99.5	31.5	32	13	88.5	16.5	27.5	25.5	44.1667	0.167553	0.177778	0.0663265	0.493036	0.0835443	0.126728	0.137219	0.234436	0.44897	0.959718
42811	hsa-miR-542-5p	1.38691	0.395363	369.5	170.5	399.5	475.5	408	360	304.5	55.5	326.5	360	328	286	228.833	324.667	1.61968	0.308333	1.66582	2.00557	1.66076	1.31797	1.19794	1.66143	0.643411	0.20693
46796	hsa-miR-1302	2.43728	0.483095	79	123.5	83	159	72	68.5	14	7	9	46	0.5	-9	10	12.5	0.0744681	0.0388889	0.0459184	0.256267	0.00253165	N/A	0.0530918	0.1294	0.354916	1.38655
17289	hsa-miR-616-5p	0.348383	0.125019	93	145	84	116.5	87	90.5	28	35	11.5	12.5	13	1	24.8333	8.83333	0.148936	0.194444	0.0586735	0.0696379	0.0658228	0.00460829	0.134018	0.0466897	0.515632	0.781617
42588		0.592961	0.0506979	92.5	148.5	97.5	94	101	109.5	27	30	24.5	15.5	23	12	27.1667	16.8333	0.143617	0.166667	0.125	0.086351	0.116456	0.0552995	0.145095	0.0860354	0.143855	0.355427
11208		1.23695	0.505312	15032.5	4053	11845	13499	12193.5	14052	14967	3936.5	11770	13422	12114	13822	10224.5	13119.3	79.6117	21.8694	60.051	74.7744	61.3367	63.6959	53.8441	66.6023	0.545414	0.107727
46620		0.846393	0.733452	3029.5	521	3674	1928	2437.5	2086.5	2960	401	3603.5	1839.5	2359	1862	2321.5	2020.17	15.7447	2.22778	18.3852	10.2479	11.9443	8.58065	12.1192	10.2576	0.715177	0.163961
10954	hsa-miR-147a	0.484699	0.165158	98.5	169.5	101	92	94.5	118.5	32.5	48	25.5	13.5	21.5	-39	35.3333	-1.33333	0.172872	0.266667	0.130102	0.0752089	0.108861	N/A	0.18988	0.0920348	0.367879	0.258548
11251		0.327742	0.0496079	103.5	168.5	103.5	91	89	124	40	48.5	29.5	13	13	-40	39.3333	-4.66667	0.212766	0.269444	0.15051	0.0724234	0.0658228	N/A	0.210907	0.0691231	0.282062	0.0675221
11227		0.65169	0.126363	139	206.5	139	118.5	131	168	74.5	89.5	66	40.5	61	-2	76.6667	33.1667	0.396277	0.497222	0.336735	0.225627	0.308861	N/A	0.410078	0.267244	0.197838	0.220231
46875	hsa-miR-2276-3p	0.239271	0.0921159	84.5	138	84.5	78	77	111	21	21.5	11	0.5	8.5	-59	17.8333	-16.6667	0.111702	0.119444	0.0561224	0.00278552	0.043038	N/A	0.0957563	0.0229117	0.360724	1.24228
11018	hsa-miR-218-5p	0.414625	0.075788	314	290	456.5	179	255.5	247.5	250.5	174	386	99.5	185	60.5	270.167	115	1.33245	0.966667	1.96939	0.554318	0.936709	0.278802	1.42283	0.589943	0.356637	0.56005
11077	hsa-miR-363-3p	0.508742	N/A	82.5	140	89.5	77.5	81	99	18	28.5	17.5	-0.5	11.5	-66.5	21.3333	-18.5	0.0957447	0.158333	0.0892857	N/A	0.0582278	N/A	0.114455	0.0582278	0.333207	N/A
46924	hsa-miR-1252-5p	1.04383	0.908924	133.5	134	147.5	133.5	131	136	72	25	76	60	59	-22	57.6667	32.3333	0.382979	0.138889	0.387755	0.334262	0.298734	N/A	0.303208	0.316498	0.469395	0.0793744
11205		1.20702	0.547915	3618	1363.5	4578	3326.5	4678.5	3961	3556	1255.5	4507.5	3249	4608	3814	3106.33	3890.33	18.9149	6.975	22.9974	18.1003	23.3316	17.576	16.2958	19.6693	0.510938	0.161799
46454	hsa-miR-520g-3p	0.323171	0.022308	83	129.5	83	81.5	77.5	97.5	19.5	18	16.5	2.5	9.5	-48.5	18	-12.1667	0.103723	0.1	0.0841837	0.0139276	0.0481013	N/A	0.095969	0.0310144	0.108106	0.779136
17422		0.753917	0.24841	151	207	142.5	153	145	194	87	96.5	74.5	78.5	78	45	86	67.1667	0.462766	0.536111	0.380102	0.437326	0.394937	0.207373	0.45966	0.346545	0.169802	0.353131
17517		1.13814	0.619185	137.5	162.5	132	166.5	149	182.5	74	54	63.5	92.5	81	50.5	63.8333	74.6667	0.393617	0.3	0.32398	0.51532	0.410127	0.232719	0.339199	0.386055	0.143364	0.369973
46453		0.59473	0.153387	120.5	182	111.5	148.5	97.5	98	59	64	44.5	52.5	22.5	27.5	55.8333	34.1667	0.31383	0.355556	0.227041	0.292479	0.113924	0.126728	0.298809	0.17771	0.219408	0.560454
42444		0.992605	0.992898	85.5	138.5	84	149.5	74.5	73.5	23	15.5	15.5	43.5	3.5	5.5	18	17.5	0.12234	0.0861111	0.0790816	0.24234	0.0177215	0.0253456	0.0958444	0.0951357	0.242204	1.34061
42686	hsa-miR-136-3p	1.55311	0.0105389	122.5	164.5	138	193	164.5	172	59.5	45.5	67.5	94	89	96.5	57.5	93.1667	0.316489	0.252778	0.344388	0.523677	0.450633	0.4447	0.304552	0.473003	0.154185	0.0929901
42558		8.49942	N/A	75.5	108	70	156	66.5	63	11.5	-2.5	1.5	52.5	-7.5	-6.5	3.5	12.8333	0.0611702	N/A	0.00765306	0.292479	N/A	N/A	0.0344116	0.292479	1.0997	N/A
17302	hsa-miR-578	0.909929	0.890645	103	169.5	92.5	176.5	90	83	38.5	53	22.5	74.5	17	12.5	38	34.6667	0.204787	0.294444	0.114796	0.415042	0.0860759	0.0576037	0.204676	0.18624	0.438861	1.06668
42932	hsa-miR-920	1.01614	0.958084	114.5	164.5	125	188	102.5	121.5	50.5	47.5	52.5	75.5	32.5	49.5	50.1667	52.5	0.268617	0.263889	0.267857	0.420613	0.164557	0.228111	0.266788	0.271093	0.009517	0.491822
17464		0.526659	0.119537	318.5	566.5	316.5	243	234	322	253.5	449	242.5	150	164.5	218.5	315	177.667	1.3484	2.49444	1.23724	0.835655	0.832911	1.00691	1.69336	0.891826	0.411003	0.111767
13485	hsa-miR-10a-5p	0.573005	0.111827	982	644	1244.5	653	626.5	508	917.5	527.5	1171.5	573.5	548	419	872.167	513.5	4.88032	2.93056	5.97704	3.19499	2.77468	1.93088	4.59597	2.63352	0.335733	0.244453
46791	hsa-miR-1204	0.447446	0.2644	98	184.5	102.5	100	95.5	105.5	33	69.5	30	21	19	-6	44.1667	11.3333	0.175532	0.386111	0.153061	0.116992	0.0962025	N/A	0.238235	0.106597	0.539621	0.137904
46976		0.313765	0.370316	91	216	97	99	91.5	120	26.5	100	26	17.5	15	-15.5	50.8333	5.66667	0.140957	0.555556	0.132653	0.097493	0.0759494	N/A	0.276389	0.0867212	0.874859	0.175663
42679		0.786478	0.492592	397	689.5	347	463	373.5	455	333	573	272.5	385.5	297	290.5	392.833	324.333	1.77128	3.18333	1.39031	2.14763	1.5038	1.33871	2.11497	1.66338	0.446641	0.256959
46750	hsa-miR-1254	0.198131	0.0751784	88	149	92	79.5	78.5	100	21.5	32	16	2.5	7	-85.5	23.1667	-25.3333	0.114362	0.177778	0.0816327	0.0139276	0.035443	N/A	0.124591	0.0246853	0.39234	0.616307
42503		0.588927	0.0648962	133.5	186.5	133.5	108	122.5	139.5	67	69.5	61	27	52	-50	65.8333	9.66667	0.356383	0.386111	0.311224	0.150418	0.263291	N/A	0.35124	0.206854	0.107355	0.385844
46624	hsa-miR-1236-3p	0.278684	0.24442	127.5	276.5	126.5	111.5	97	135.5	64.5	161.5	55	28	25	-56	93.6667	-1	0.343085	0.897222	0.280612	0.155989	0.126582	N/A	0.506973	0.141286	0.669475	0.147174
46917	hsa-miR-205-5p	0.659817	0.170331	133	179	116.5	120.5	108.5	158	71	65.5	46	43	37.5	-32.5	60.8333	16	0.37766	0.363889	0.234694	0.239554	0.189873	N/A	0.325414	0.214714	0.242359	0.163612
42769	hsa-let-7b-3p	0.600984	0.13229	246	227.5	245	188.5	202	232	181.5	113.5	172.5	110	131	46	155.833	95.6667	0.965426	0.630556	0.880102	0.612813	0.663291	0.211982	0.825361	0.496029	0.210837	0.498526
11240	hsa-miR-409-3p	0.770309	0.366141	183	213	164	163.5	187	220.5	119.5	98	93	86.5	116.5	44	103.5	82.3333	0.635638	0.544444	0.47449	0.481894	0.589873	0.202765	0.551524	0.424844	0.146516	0.470197
42964	hsa-miR-7-2-3p	0.602327	0.212244	86	138.5	88.5	83.5	89.5	123.5	24	24.5	18	7	20.5	-30	22.1667	-0.833333	0.12766	0.136111	0.0918367	0.0389972	0.103797	N/A	0.118536	0.0713973	0.198295	0.64177
46803	hsa-miR-503-5p	0.829811	0.764602	313	136.5	330.5	202.5	326.5	243	249.5	24	261	128.5	257.5	64.5	178.167	150.167	1.32713	0.133333	1.33163	0.715877	1.3038	0.297235	0.930698	0.772303	0.741961	0.654727
146105	hsa-miR-1539	0.188883	0.0247563	76.5	119.5	84	79.5	72	86.5	17	10	17.5	3.5	2	-47.5	14.8333	-14	0.0904255	0.0555556	0.0892857	0.0194986	0.0101266	N/A	0.0784223	0.0148126	0.252624	0.447391
146077	hsv2-miR-H3	0.235605	0.103229	94	165.5	97.5	87	81	98.5	30	58	31	8.5	10.5	-29	39.6667	-3.33333	0.159574	0.322222	0.158163	0.0473538	0.0531646	N/A	0.21332	0.0502592	0.442128	0.0817533
27953	spike_control_v2_28	0.876543	0.8128	2932.5	205	2367	1595.5	1774	1615	2869.5	91	2296	1500	1703.5	1542.5	1752.17	1582	15.2633	0.505556	11.7143	8.35655	8.62532	7.10829	9.16105	8.03005	0.840849	0.100809
146051		1.24821	0.790391	84.5	135.5	79.5	136.5	73	66	20	20	9.5	37	3	-5	16.5	11.6667	0.106383	0.111111	0.0484694	0.206128	0.0151899	N/A	0.0886545	0.110659	0.393455	1.22009
146038		0.616972	0.496207	106	223.5	92.5	176	92	89	42.5	97	26.5	66.5	21.5	16.5	55.3333	34.8333	0.226064	0.538889	0.135204	0.370474	0.108861	0.0760369	0.300052	0.185124	0.705773	0.871603
146146		0.632709	0.0380826	2068.5	2770.5	2104.5	1447.5	1686.5	1596.5	2007.5	2647.5	2034.5	1343	1611.5	1516.5	2229.83	1490.33	10.6782	14.7083	10.3801	7.48189	8.15949	6.98848	11.9222	7.54329	0.202769	0.077939
42838		0.918684	0.667003	184.5	224.5	185.5	235.5	154.5	178	120.5	103.5	113.5	135	82.5	104	112.5	107.167	0.640957	0.575	0.579082	0.752089	0.417722	0.479263	0.598346	0.549691	0.061768	0.323749
30293	spike_control_v2_49	0.596336	0.0476235	1395	904.5	1337.5	776.5	824	758.5	1332	784.5	1265	671	753	677.5	1127.17	700.5	7.08511	4.35833	6.45408	3.73816	3.81266	3.12212	5.96584	3.55765	0.23927	0.106534
145661	SNORD65	0.52965	0.21067	122.5	276	161.5	131.5	123	161	58	159	89	49.5	54	70	102	57.8333	0.308511	0.883333	0.454082	0.275766	0.273418	0.322581	0.548642	0.290588	0.544709	0.0954313
19605	SNORD6	0.495254	0.00874065	7991	8450.5	11317	3665.5	5646	5354.5	7925.5	8332	11245	3585.5	5571	5215.5	9167.5	4790.67	42.1569	46.2889	57.3724	19.9749	28.2076	24.0346	48.6061	24.0724	0.161872	0.171004
146097		0.373371	0.186825	119	241	118	122	110.5	122	55	123.5	45	44	37.5	3.5	74.5	28.3333	0.292553	0.686111	0.229592	0.245125	0.189873	0.016129	0.402752	0.150376	0.614292	0.794664
46436		1.01658	0.889716	4453	4023.5	5983.5	4829.5	5372.5	5132.5	4390	3916.5	5910	4745	5301	5042	4738.83	5029.33	23.3511	21.7583	30.1531	26.4345	26.8405	23.235	25.0875	25.5034	0.177723	0.0774366
146039		0.459036	0.237376	114	218	122	111.5	100	141.5	49.5	101.5	49.5	32.5	29.5	-25.5	66.8333	12.1667	0.263298	0.563889	0.252551	0.181058	0.149367	N/A	0.359913	0.165213	0.491037	0.135638
145994		0.825325	0.424525	282.5	334	332	298.5	321.5	307	217.5	215	260	220	250.5	117.5	230.833	196	1.15691	1.19444	1.32653	1.22563	1.26835	0.541475	1.22596	1.01182	0.0726713	0.403125
146050		0.471376	0.350154	132.5	305.5	153	129	129	191.5	67	190	80	49.5	58.5	-33	112.333	25	0.356383	1.05556	0.408163	0.275766	0.296203	N/A	0.606701	0.285984	0.642131	0.05053
13430	spike_control_v2_10	0.739616	0.54735	224	161.5	201	152.5	164.5	173.5	161	47	128.5	71.5	94	-32	112.167	44.5	0.856383	0.261111	0.655612	0.398329	0.475949	N/A	0.591035	0.437139	0.512396	0.125558
42831		0.68327	0.105145	377.5	452	507	312	416.5	378	314.5	339	435	233.5	345	195	362.833	257.833	1.67287	1.88333	2.21939	1.30084	1.74684	0.898618	1.9252	1.31543	0.143181	0.322554
146124		0.313781	0.194598	80	137.5	82	80.5	80.5	108	18.5	26.5	9.5	1.5	10.5	-58.5	18.1667	-15.5	0.0984043	0.147222	0.0484694	0.00835655	0.0531646	N/A	0.098032	0.0307606	0.503687	1.03002
146152	hsa-miR-3179	0.334538	0.164763	80	127.5	75	82	77	101.5	18.5	15.5	7	2	7.5	-44	13.6667	-11.5	0.0984043	0.0861111	0.0357143	0.0111421	0.0379747	N/A	0.0734099	0.0245584	0.452513	0.772589
145745	hsa-miR-335-3p	1.05551	0.759618	2276.5	3299.5	2173.5	2822	2881	2911	2214.5	3186.5	2105.5	2743.5	2811.5	2807.5	2502.17	2787.5	11.7793	17.7028	10.7423	15.2841	14.2354	12.9378	13.4081	14.1525	0.280072	0.0830504
145679		0.45152	N/A	85.5	141.5	84	76	80.5	92.5	24.5	28	16.5	-0.5	11	-41.5	23	-10.3333	0.130319	0.155556	0.0841837	N/A	0.0556962	N/A	0.123353	0.0556962	0.293405	N/A
145697	hsa-miR-367-5p	0.635351	N/A	71	112.5	77.5	80	69.5	81.5	11	3.5	10.5	5	-1.5	-53	8.33333	-16.5	0.0585106	0.0194444	0.0535714	0.0278552	N/A	N/A	0.0438422	0.0278552	0.485215	N/A
145701	hsa-miR-668-3p	0.573322	0.42322	209.5	803	323	277	280	349.5	148.5	688	253	185.5	209	280.5	363.167	225	0.789894	3.82222	1.29082	1.03343	1.05823	1.29263	1.96764	1.12809	0.826127	0.126788
145843	hsa-miR-330-5p	0.686272	0.460427	94	157	91.5	133	86.5	75.5	28	35.5	22	37.5	14.5	7	28.5	19.6667	0.148936	0.197222	0.112245	0.208914	0.0734177	0.0322581	0.152801	0.104863	0.278927	0.88144
145754	hsa-miR-523-3p	1.62703	0.672507	77	134.5	75.5	160	74	74.5	13.5	18	6.5	53	3	5	12.6667	20.3333	0.0718085	0.1	0.0331633	0.295265	0.0151899	0.0230415	0.0683239	0.111165	0.491107	1.43465
145696	hsa-miR-655-3p	1.07817	0.878253	83.5	131.5	88.5	132	86.5	76	19.5	13	17	31	15	7.5	16.5	17.8333	0.103723	0.0722222	0.0867347	0.172702	0.0759494	0.0345622	0.0875601	0.0944045	0.180068	0.75097
145638	hsa-miR-29a-5p	0.778893	0.120441	821.5	747.5	946.5	537.5	787.5	785	758.5	631.5	876.5	438	716.5	714	755.5	622.833	4.03457	3.50833	4.47194	2.44011	3.62785	3.29032	4.00495	3.11943	0.120472	0.1962
145741	hsa-miR-545-3p	1.33372	0.757468	84.5	132	90	153.5	77	74.5	20.5	10.5	17	50.5	5	7	16	20.8333	0.109043	0.0583333	0.0867347	0.281337	0.0253165	0.0322581	0.0847035	0.112971	0.300053	1.29105
146100		0.32368	0.0965756	116.5	232	122.5	110.5	96.5	98	53	112.5	51	29.5	28.5	15	72.1667	24.3333	0.281915	0.625	0.260204	0.164345	0.144304	0.0691244	0.38904	0.125925	0.526002	0.398657
147827	hsa-miR-3130-3p	0.222141	N/A	87.5	127.5	81	77	74	76	25	9.5	10.5	-0.5	3.5	-17.5	15	-4.83333	0.132979	0.0527778	0.0535714	N/A	0.0177215	N/A	0.079776	0.0177215	0.577575	N/A
147820	hsa-miR-3133	0.47509	0.17223	85.5	168	102	96	97.5	113	22	48	28	18.5	24.5	5	32.6667	16	0.117021	0.266667	0.142857	0.103064	0.124051	0.0230415	0.175515	0.0833854	0.455742	0.63923
147845	hsa-miR-3173-3p	0.201321	0.0119234	92.5	139	100.5	87	79.5	100	28	19.5	25	2	8	-30	24.1667	-6.66667	0.148936	0.108333	0.127551	0.0111421	0.0405063	N/A	0.128274	0.0258242	0.158342	0.804039
145897	hsa-miR-92b-3p	1.25262	0.125757	126	152	137.5	150.5	143.5	158	62	44.5	64	70	72	-7.5	56.8333	44.8333	0.329787	0.247222	0.326531	0.389972	0.364557	N/A	0.30118	0.377265	0.155247	0.0476357
147195	hsa-miR-18a-5p	1.07579	N/A	76.5	111	89.5	77	81.5	97	12.5	2	18	-1.5	12	-90	10.8333	-26.5	0.0664894	0.0111111	0.0918367	N/A	0.0607595	N/A	0.0564791	0.0607595	0.730949	N/A
147203	hsa-miR-302a-3p	0.269831	0.348277	183.5	1157.5	253.5	221	240.5	297.5	119.5	1044	179	142	168.5	73.5	447.5	128	0.635638	5.8	0.913265	0.791086	0.853165	0.33871	2.44963	0.660987	1.18582	0.424851
148008		0.344641	0.290413	560	2347.5	640	485.5	476	587	496.5	2234.5	565.5	404	408	405	1098.83	405.667	2.64096	12.4139	2.8852	2.2507	2.06582	1.86636	5.98002	2.06096	0.931976	0.0932646
147865	hsa-miR-4330	N/A	N/A	75.5	118	78	70.5	67.5	102	12	4	6	-9	-1.5	-79	7.33333	-29.8333	0.0638298	0.0222222	0.0306122	N/A	N/A	N/A	0.0388881	N/A	0.565822	N/A
147870	hsa-miR-548s	N/A	N/A	74	109.5	77	73	66.5	98.5	13.5	0	5	-2.5	-3.5	-70	6.16667	-25.3333	0.0718085	N/A	0.0255102	N/A	N/A	N/A	0.0486594	N/A	0.672797	N/A
147919	kshv-miR-K12-12-3p	0.430324	0.0568041	121.5	177	112	99.5	95	135.5	60	62	40.5	23	24	-33.5	54.1667	4.5	0.319149	0.344444	0.206633	0.128134	0.121519	N/A	0.290075	0.124826	0.252907	0.0374705
147754		0.572452	0.0323513	84	135	89.5	92	80.5	100.5	21	21	20	14	9.5	-47.5	20.6667	-8	0.111702	0.116667	0.102041	0.0779944	0.0481013	N/A	0.110137	0.0630478	0.0675303	0.335264
147837	hsa-miR-3119	0.200145	0.0230134	77	131.5	82.5	79	74.5	96	16	17.5	11.5	3.5	2.5	-49.5	15	-14.5	0.0851064	0.0972222	0.0586735	0.0194986	0.0126582	N/A	0.080334	0.0160784	0.245382	0.300831
147981	hsa-miR-4325	0.66293	0.123125	117	159	109.5	100.5	112.5	123.5	54.5	51	43.5	24	43	-17.5	49.6667	16.5	0.289894	0.283333	0.221939	0.133705	0.217722	N/A	0.265055	0.175713	0.141419	0.338101
147789		0.558815	0.483321	289	973	218.5	359.5	244	427	226	864.5	152.5	279.5	173.5	294	414.333	249	1.20213	4.80278	0.778061	1.5571	0.878481	1.35484	2.26099	1.26347	0.978086	0.275759
147562	hsa-miR-4253	0.608278	0.398701	89	155.5	86	125.5	81.5	72.5	23.5	38.5	16	30.5	11.5	6	26	16	0.125	0.213889	0.0816327	0.169916	0.0582278	0.0276498	0.140174	0.0852647	0.480982	0.878299
147846	hsa-miR-4313	0.174383	0.225246	83.5	204	89	103	78.5	72.5	21.5	85.5	15	12	7	3	40.6667	7.33333	0.114362	0.475	0.0765306	0.0668524	0.035443	0.0138249	0.221964	0.0387068	0.990928	0.688871
147748	hsv1-miR-H12	5.12439	N/A	77.5	120	81	140.5	70.5	63.5	14.5	1.5	8.5	39.5	0	-4.5	8.16667	11.6667	0.0771277	0.00833333	0.0433673	0.220056	N/A	N/A	0.0429428	0.220056	0.801046	N/A
148430	hsa-miR-374c-5p	1.24653	0.581598	400.5	207	631	476	555	489.5	334.5	87.5	559	359.5	482.5	419.5	327	420.5	1.77926	0.486111	2.85204	2.00279	2.44304	1.93318	1.7058	2.12633	0.694497	0.130023
148495	hsa-miR-3915	0.960256	0.878047	430.5	271	442	354	420.5	362.5	365.5	154.5	372	258	350	283	297.333	297	1.94415	0.858333	1.89796	1.43733	1.77215	1.30415	1.56681	1.50454	0.391876	0.160271
148335	hsa-miR-3606-5p	0.867754	0.809995	108	184	96	172	91.5	93	44.5	64.5	26.5	76.5	20.5	22.5	45.1667	39.8333	0.236702	0.358333	0.135204	0.426184	0.103797	0.103687	0.243413	0.211223	0.458956	0.881354
148208	hsa-miR-3610	7.29359	N/A	73.5	109	71.5	124.5	67	68	5.5	-15	2.5	27.5	-3.5	-4.5	-2.33333	6.5	0.0292553	N/A	0.0127551	0.153203	N/A	N/A	0.0210052	0.153203	0.555453	N/A
148562	hsa-miR-128-1-5p	0.566138	N/A	84	137.5	88	79	79	71	18	20.5	11.5	-4	10	-7.5	16.6667	-0.5	0.0957447	0.113889	0.0586735	N/A	0.0506329	N/A	0.0894357	0.0506329	0.314675	N/A
147715	hsa-miR-4251	0.598934	0.136983	174	174	147	116.5	134.5	141	111	54	74	42	61	47	79.6667	50	0.590426	0.3	0.377551	0.233983	0.308861	0.21659	0.422659	0.253145	0.355785	0.19368
148042	hsa-miR-3662	0.575432	N/A	91.5	138.5	85.5	78	82	87.5	26.5	12.5	10.5	-1	10	-11.5	16.5	-0.833333	0.140957	0.0694444	0.0535714	N/A	0.0506329	N/A	0.0879911	0.0506329	0.52905	N/A
148332	hsa-miR-3692-5p	0.29599	N/A	79.5	119.5	78	73.5	76	72.5	14.5	-1.5	5	-4	3	-49	6	-16.6667	0.0771277	N/A	0.0255102	N/A	0.0151899	N/A	0.0513189	0.0151899	0.71122	N/A
147334	hsa-miR-3613-5p	0.969356	0.912723	109.5	155.5	118.5	109	130.5	149	46.5	37	45	26	58.5	-0.5	42.8333	28	0.24734	0.205556	0.229592	0.144847	0.296203	N/A	0.227496	0.220525	0.0921825	0.485318
147722	hsa-miR-4306	0.667147	0.0876574	1340.5	863	1287	860	785.5	870	1277.5	746.5	1214	779	715	753.5	1079.33	749.167	6.79521	4.14722	6.19388	4.33983	3.62025	3.47235	5.7121	3.81081	0.243024	0.121779
147718	hsv1-miR-H3-5p	0.312106	0.0111835	285.5	286	289.5	165	165.5	193.5	220.5	166	215	85	95.5	8.5	200.5	63	1.17287	0.922222	1.09694	0.473538	0.483544	0.0391705	1.06401	0.332084	0.120796	0.764023
148642		0.903906	0.609627	5084	5356	6299.5	5279.5	6627.5	3858	5015.5	5246	6227.5	5201.5	6558	3688	5496.33	5149.17	26.6782	29.1444	31.773	28.9777	33.2051	16.9954	29.1985	26.3927	0.0872583	0.318585
148040	hsa-miR-1247-3p	0.487144	0.472138	117	129	87	88	83.5	108	52.5	13.5	14	13	13	-68	26.6667	-14	0.279255	0.075	0.0714286	0.0724234	0.0658228	N/A	0.141895	0.0691231	0.838448	0.0675221
147595	hsa-miR-3178	1.09166	0.837828	1271.5	278.5	1535.5	1005	1295.5	1204	1208.5	166.5	1464	927	1227	1042.5	946.333	1065.5	6.42819	0.925	7.46939	5.16435	6.21266	4.80415	4.94086	5.39372	0.711735	0.135664
147712	hsv1-miR-H1-5p	0.402687	0.301718	84.5	158.5	81.5	86.5	80.5	119	19.5	43	14	9.5	11.5	-47	25.5	-8.66667	0.103723	0.238889	0.0714286	0.0529248	0.0582278	N/A	0.138014	0.0555763	0.643707	0.0674717
148170		N/A	N/A	70.5	107	69.5	66.5	64	86	3.5	-3	0.5	-10	-7	-76.5	0.333333	-31.1667	0.018617	N/A	0.00255102	N/A	N/A	N/A	0.010584	N/A	1.07335	N/A
148580	hsa-miR-134-3p	0.167119	N/A	75	112.5	75.5	78	70.5	83.5	11	1.5	6.5	1	0	-72.5	6.33333	-23.8333	0.0585106	0.00833333	0.0331633	0.00557103	N/A	N/A	0.0333357	0.00557103	0.752618	N/A
148110		0.222204	0.0943379	89.5	138	82	77	75.5	86	21.5	27	12.5	1	8.5	-72.5	20.3333	-21	0.114362	0.15	0.0637755	0.00557103	0.043038	N/A	0.109379	0.0243045	0.396124	1.09005
148538		0.0848381	N/A	78	115.5	77	75.5	70.5	87.5	15.5	10.5	7.5	-5	1	-59.5	11.1667	-21.1667	0.0824468	0.0583333	0.0382653	N/A	0.00506329	N/A	0.0596818	0.00506329	0.370659	N/A
148091		0.733484	0.607463	82.5	129.5	80.5	113	75.5	70	14	11	11	19	5.5	1.5	12	8.66667	0.0744681	0.0611111	0.0561224	0.10585	0.0278481	0.00691244	0.0639005	0.04687	0.148443	1.11242
148016		0.673648	0.453439	81.5	148	86.5	120	78	72	16	28	21	28.5	9	6.5	21.6667	14.6667	0.0851064	0.155556	0.107143	0.158774	0.0455696	0.0299539	0.115935	0.0780993	0.310848	0.900156
148459		1.27676	0.499748	129	170.5	141.5	214	141	126	61	52	70.5	115.5	70.5	52.5	61.1667	79.5	0.324468	0.288889	0.359694	0.643454	0.356962	0.241935	0.32435	0.414117	0.109149	0.499306
148612		1.40179	0.682889	84	128.5	76	124.5	71.5	68	17	12.5	7	29.5	-1	4	12.1667	10.8333	0.0904255	0.0694444	0.0357143	0.164345	N/A	0.0184332	0.0651948	0.0913893	0.423379	1.12897
148511		0.956023	0.946945	97	144.5	82.5	140	81.5	74.5	22.5	26	14	42.5	12.5	4.5	20.8333	19.8333	0.119681	0.144444	0.0714286	0.236769	0.0632911	0.0207373	0.111851	0.106932	0.331979	1.07018
148453	hsa-miR-3074-5p	0.969116	0.963369	99.5	138	85.5	145	84	79	31.5	20	16.5	47	10	8.5	22.6667	21.8333	0.167553	0.111111	0.0841837	0.261838	0.0506329	0.0391705	0.120949	0.117214	0.351772	1.06966
148212		0.845223	0.465692	348.5	548.5	332.5	357	360.5	409	282.5	435.5	263	257.5	290.5	335	327	294.333	1.50266	2.41944	1.34184	1.43454	1.47089	1.54378	1.75465	1.48307	0.331303	0.0375093
148530		0.539722	0.320567	85.5	165	95.5	120	81.5	84.5	22.5	42.5	20.5	31.5	8.5	6.5	28.5	15.5	0.119681	0.236111	0.104592	0.175487	0.043038	0.0299539	0.153461	0.0828265	0.469	0.972069
148517		0.121175	0.0138322	96.5	145	92	83	74	84.5	28	27.5	19.5	4	2	-1.5	25	1.5	0.148936	0.152778	0.0994898	0.0222841	0.0101266	N/A	0.133735	0.0162054	0.222224	0.530484
148267		0.742588	0.165721	358	562.5	431	305	409.5	421.5	295	442	358	225	338	299.5	365	287.5	1.56915	2.45556	1.82653	1.25348	1.71139	1.38018	1.95041	1.44835	0.233799	0.16325
148134		0.237653	0.143144	102.5	169.5	92	86	85.5	92	35	51.5	18	6.5	10.5	-23.5	34.8333	-2.16667	0.18617	0.286111	0.0918367	0.0362117	0.0531646	N/A	0.188039	0.0446881	0.516651	0.268248
148389		0.908135	0.886406	1140.5	5438.5	1789.5	1586	1814.5	5189.5	1077.5	5319	1714	1504	1740.5	4945.5	2703.5	2730	5.73138	29.55	8.7449	8.37883	8.81266	22.7903	14.6754	13.3273	0.883762	0.615138
148484		0.506191	0.0314023	4129.5	6323	6013.5	2206	3807.5	2972.5	4066.5	6210.5	5939	2126.5	3737	2817.5	5405.33	2893.67	21.6303	34.5028	30.301	11.8468	18.9215	12.9839	28.8114	14.5841	0.227835	0.260499
148576		0.920578	0.878976	116	129.5	99	101.5	98.5	123	47.5	12	24.5	23.5	28	-34.5	28	5.66667	0.25266	0.0666667	0.125	0.130919	0.141772	N/A	0.148109	0.136346	0.642268	0.0562847
148435		1.12348	0.645633	218.5	241	176.5	247.5	252.5	288.5	155.5	133	104	171.5	180.5	105.5	130.833	152.5	0.827128	0.738889	0.530612	0.955432	0.913924	0.486175	0.698876	0.785177	0.217855	0.330847
148329		N/A	N/A	73.5	108	80	74	69	97	8.5	-5.5	9.5	-2.5	0	-78	4.16667	-26.8333	0.0452128	N/A	0.0484694	N/A	N/A	N/A	0.0468411	N/A	0.0491615	N/A
148600		1.47162	0.526381	82	115.5	89	95.5	92	137	19	0.5	19	14	23.5	-42	12.8333	-1.5	0.101064	0.00277778	0.0969388	0.0779944	0.118987	N/A	0.0669268	0.0984909	0.830653	0.294305
148028		0.191776	N/A	83.5	136	82	76	75.5	95.5	16.5	24	11	-0.5	3.5	-84.5	17.1667	-27.1667	0.087766	0.133333	0.0561224	N/A	0.0177215	N/A	0.0924072	0.0177215	0.420033	N/A
148555		N/A	N/A	70	115.5	79.5	71.5	71	101	5.5	7	9	-6.5	-0.5	-84.5	7.16667	-30.5	0.0292553	0.0388889	0.0459184	N/A	N/A	N/A	0.0380209	N/A	0.220021	N/A
148153		N/A	N/A	65	112.5	64	71	65	83.5	-1	2	-4	-7.5	-3	-98.5	-1	-36.3333	N/A	0.0111111	N/A	N/A	N/A	N/A	0.0111111	N/A	N/A	N/A
148392		N/A	N/A	70.5	108.5	71.5	71	66.5	85.5	7	3	3.5	-7	-4	-79.5	4.5	-30.1667	0.037234	0.0166667	0.0178571	N/A	N/A	N/A	0.0239193	N/A	0.482718	N/A
148636		0.596223	0.135915	186.5	311	221.5	189	189.5	210	124	205	151	114	122	60.5	160	98.8333	0.659574	1.13889	0.770408	0.635097	0.617722	0.278802	0.856291	0.51054	0.293047	0.393464
148301		4.18942	N/A	68.5	113	69	104.5	70	61.5	3.5	-4	-2	14	-2	-6	-0.833333	2	0.018617	N/A	N/A	0.0779944	N/A	N/A	0.018617	0.0779944	N/A	N/A
146094	hsa-miR-1911-3p	2.43418	N/A	76.5	121.5	74	102.5	65	64.5	7.5	3.5	2.5	10.5	-2.5	-4.5	4.5	1.16667	0.0398936	0.0194444	0.0127551	0.0584958	N/A	N/A	0.0240311	0.0584958	0.588351	N/A
11039		0.842596	0.25557	21975	17993	25820	14220.5	22454.5	21910	21912	17875	25745	14105	22382.5	21841	21844	19442.8	116.553	99.3056	131.352	78.5794	113.329	100.65	115.737	97.5194	0.13858	0.180324
46592	hsa-miR-548j-5p	1.90861	N/A	81.5	128	77.5	109	71.5	70	12	7.5	8.5	17	-2	-0.5	9.33333	4.83333	0.0638298	0.0416667	0.0433673	0.0947075	N/A	N/A	0.0496213	0.0947075	0.248569	N/A
27565	hsa-miR-423-5p	0.939521	0.844749	1149	468	1063.5	887.5	911	774	1084	351.5	992.5	809	841	704	809.333	784.667	5.76596	1.95278	5.06378	4.50696	4.25823	3.24424	4.26084	4.00314	0.4763	0.167092
146147		0.551197	0.108602	880.5	1568	948	675	715.5	680.5	814.5	1450.5	878.5	576	646.5	611.5	1047.83	611.333	4.33245	8.05833	4.48214	3.20891	3.27342	2.81797	5.62431	3.1001	0.375025	0.0794975
168805	hsa-miR-4478	0.84936	0.29186	211.5	276	198	231.5	182.5	204	138.5	160.5	128	138.5	112	130	142.333	126.833	0.736702	0.891667	0.653061	0.771588	0.567089	0.599078	0.760477	0.645918	0.159198	0.170303
168648	hsa-miR-4687-5p	0.564738	0.101927	145.5	243	153	131	140	130	71.5	124	84.5	50.5	69	47	93.3333	55.5	0.380319	0.688889	0.431122	0.281337	0.349367	0.21659	0.50011	0.282431	0.330825	0.235085
46474	hsa-miR-766-5p	0.486284	0.0778839	129	240.5	152.5	123.5	121	149.5	64	124.5	84	44.5	49	46.5	90.8333	46.6667	0.340426	0.691667	0.428571	0.247911	0.248101	0.214286	0.486888	0.236766	0.375319	0.0822276
168799	hsa-miR-4710	1.46359	0.470609	82.5	123	79	87	91	103.5	13	7	7	7	20	-10.5	9	5.5	0.0691489	0.0388889	0.0357143	0.0389972	0.101266	N/A	0.0479174	0.0701315	0.385152	0.627828
168591	hsa-miR-4789-3p	0.250954	0.0740236	86	131	85.5	82	77.5	93.5	21	13	12	1	7	-27.5	15.3333	-6.5	0.111702	0.0722222	0.0612245	0.00557103	0.035443	N/A	0.0817163	0.020507	0.324835	1.03002
168675	hsa-miR-4433-3p	0.439073	0.0458286	100.5	110.5	98.5	91.5	86	109.5	35	-10	28.5	12.5	15	-23.5	17.8333	1.33333	0.18617	N/A	0.145408	0.0696379	0.0759494	N/A	0.165789	0.0727936	0.173854	0.0613088
168885	hsa-miR-5194	0.524135	0.214854	74	121	80.5	80	74	89	8.5	3.5	6.5	2.5	4	-56.5	6.16667	-16.6667	0.0452128	0.0194444	0.0331633	0.0139276	0.0202532	N/A	0.0326068	0.0170904	0.395413	0.261718
168673	hsa-miR-4656	0.19172	0.342841	79.5	118.5	78	79	76	90	15	0.5	7.5	0.5	2.5	-66.5	7.66667	-21.1667	0.0797872	0.00277778	0.0382653	0.00278552	0.0126582	N/A	0.0402768	0.00772187	0.956981	0.904063
168814	hsa-miR-4463	2.33464	0.0332536	129	136.5	134.5	192.5	216.5	270.5	65.5	21	64	115	147	100.5	50.1667	120.833	0.348404	0.116667	0.326531	0.640669	0.744304	0.463134	0.263867	0.616035	0.484894	0.230822
168744	hsa-miR-4746-5p	N/A	N/A	71	103	65.5	72	65.5	96.5	7	-8	-5	-6	-6.5	-83.5	-2	-32	0.037234	N/A	N/A	N/A	N/A	N/A	0.037234	N/A	N/A	N/A
168628	hsa-miR-5695	N/A	N/A	58.5	91	57	63	57	106.5	-5	-18	-14	-15.5	-14	-82.5	-12.3333	-37.3333	N/A	N/A	N/A	N/A	N/A	N/A	N/A	N/A	N/A	N/A
168742	hsa-miR-4722-3p	0.272942	N/A	71.5	124.5	83	77	72	98.5	6	16	14.5	-4	3.5	-83	12.1667	-27.8333	0.0319149	0.0888889	0.0739796	N/A	0.0177215	N/A	0.0649278	0.0177215	0.455058	N/A
168933	hsa-miR-5581-3p	1.43105	0.271824	9502.5	2594.5	10275.5	11457	10490.5	11074.5	9439	2484.5	10211	11365	10421	10866.5	7378.17	10884.2	50.2074	13.8028	52.0969	63.3148	52.7646	50.076	38.7024	55.3851	0.557702	0.126344
168619	hsa-miR-1260b	1.30339	0.430969	51875	13533.5	53478.5	54167.5	58272.5	46943.5	51811	13424	53411	54078	58202.5	46789	39548.7	53023.2	275.59	74.5778	272.505	301.27	294.696	215.618	207.558	270.528	0.554903	0.176201
168568	hsa-miR-1290	1.12626	0.806535	441	152.5	551.5	460	499	390.5	377.5	43	484	369	426	238.5	301.5	344.5	2.00798	0.238889	2.46939	2.05571	2.15696	1.09908	1.57209	1.77058	0.748945	0.329688
168620	hsa-miR-548au-3p	2.30882	N/A	72	116	72	108.5	71.5	64	5	-3	-4	17.5	5	-4	-0.666667	6.16667	0.0265957	N/A	N/A	0.097493	0.0253165	N/A	0.0265957	0.0614047	N/A	0.83115
168954	hsa-miR-5580-5p	2.01123	0.00026976	278	318	320	531.5	516.5	546	206	199.5	245.5	445	447	479.5	217	457.167	1.09574	1.10833	1.25255	2.47911	2.26329	2.20968	1.15221	2.31736	0.0756163	0.0615447
168811	hsa-miR-1255b-2-3p	1.05261	0.901443	193	451	196	311.5	251.5	306	117.5	329.5	124	222	182.5	236.5	190.333	213.667	0.625	1.83056	0.632653	1.23677	0.924051	1.08986	1.0294	1.08356	0.674011	0.144389
168801	hsa-miR-4477b	13.846	N/A	71.5	125	68.5	115	72.5	66.5	3	-2	0.5	23	-5.5	-5.5	0.5	4	0.0159574	N/A	0.00255102	0.128134	N/A	N/A	0.00925423	0.128134	1.02437	N/A
168697	hsa-miR-3189-5p	0.410029	0.3822	82	180.5	85.5	121	81.5	73	13.5	60	15.5	27.5	8.5	0.5	29.6667	12.1667	0.0718085	0.333333	0.0790816	0.153203	0.043038	0.00230415	0.161408	0.0661818	0.922733	1.17958
169333	hsa-miR-3194-3p	1.06201	0.948963	79.5	123	73.5	113.5	72.5	72.5	12.5	5.5	2.5	17.5	1.5	2.5	6.83333	7.16667	0.0664894	0.0305556	0.0127551	0.097493	0.00759494	0.0115207	0.0366	0.0388696	0.747878	1.30712
169279	hsa-miR-499b-3p	N/A	N/A	66	96.5	62.5	103	63	57.5	-0.5	-25	-10	5	-9	-11.5	-11.8333	-5.16667	N/A	N/A	N/A	0.0278552	N/A	N/A	N/A	0.0278552	N/A	N/A
169117	hsa-miR-4759	13.6156	N/A	70	113.5	68	117.5	61.5	61.5	1.5	-8	-6	19.5	-11.5	-10	-4.16667	-0.666667	0.00797872	N/A	N/A	0.108635	N/A	N/A	0.00797872	0.108635	N/A	N/A
169195	hsa-miR-4798-3p	N/A	N/A	63.5	87	60	84.5	62.5	59	-5.5	-33.5	-11.5	-2.5	-12.5	-23	-16.8333	-12.6667	N/A	N/A	N/A	N/A	N/A	N/A	N/A	N/A	N/A	N/A
168988	hsa-miR-4799-5p	N/A	N/A	65	99	68.5	63.5	62	66	-5.5	-23.5	-3	-19.5	-11.5	-28.5	-10.6667	-19.8333	N/A	N/A	N/A	N/A	N/A	N/A	N/A	N/A	N/A	N/A
169151	hsa-miR-4526	0.236407	N/A	78.5	114	80	78	77.5	81	11.5	-1.5	9	-2	2.5	-24.5	6.33333	-8	0.0611702	N/A	0.0459184	N/A	0.0126582	N/A	0.0535443	0.0126582	0.201416	N/A
169147	hsa-miR-548am-5p/hsa-miR-548au-5p/hsa-miR-548c-5p/hsa-miR-548o-5p	N/A	N/A	67	104	69	72.5	66	72	0.5	-9.5	-3.5	-6.5	-4.5	-40	-4.16667	-17	0.00265957	N/A	N/A	N/A	N/A	N/A	0.00265957	N/A	N/A	N/A
169174	hsa-miR-4709-5p	N/A	N/A	69.5	115	79	72.5	60	77	2	-1.5	8.5	-4.5	-11.5	-47	3	-21	0.0106383	N/A	0.0433673	N/A	N/A	N/A	0.0270028	N/A	0.857056	N/A
169241	hsa-miR-5571-3p	N/A	N/A	74	124	76.5	76.5	71.5	83.5	7.5	8.5	5	-2	0	-57	7	-19.6667	0.0398936	0.0472222	0.0255102	N/A	N/A	N/A	0.037542	N/A	0.294214	N/A
169211	hsa-miR-5704	0.664111	0.0462394	767.5	788	610.5	548	524.5	576.5	704	669	537.5	471.5	455.5	400	636.833	442.333	3.74468	3.71667	2.74235	2.62674	2.30633	1.84332	3.40123	2.2588	0.167816	0.174371
169188	hsa-miR-4443	0.390268	0.346566	3686.5	19405	4702	3669	4134.5	4063.5	3622.5	19292.5	4629.5	3592	4063	3902.5	9181.5	3852.5	19.2686	107.181	23.6199	20.0111	20.5722	17.9839	50.023	19.5224	0.990497	0.0697457
169336	hsa-miR-17-5p	1.02991	0.958003	144	186.5	190.5	188.5	234.5	180	80	71	118.5	110.5	165	3.5	89.8333	93	0.425532	0.394444	0.604592	0.615599	0.835443	0.016129	0.474856	0.489057	0.238861	0.867101
169354	hsa-miR-4493	N/A	N/A	75.5	119.5	79.5	70.5	68	98	9.5	7.5	14	-6	-1	-79	10.3333	-28.6667	0.0505319	0.0416667	0.0714286	N/A	N/A	N/A	0.0545424	N/A	0.280165	N/A
169090	hsa-miR-5186	N/A	N/A	67	114	67	70	61.5	89.5	2.5	6.5	-1.5	-5	-9	-75.5	2.5	-29.8333	0.0132979	0.0361111	N/A	N/A	N/A	N/A	0.0247045	N/A	0.652974	N/A
169222	hsa-miR-4760-5p	0.104357	0.0541572	72	126.5	77.5	73.5	70.5	97	8	16.5	11.5	1.5	1	-64	12	-20.5	0.0425532	0.0916667	0.0586735	0.00835655	0.00506329	N/A	0.0642978	0.00670992	0.389362	0.347051
169176	hsa-miR-5587-5p	0.563684	0.625766	72	138	73	84.5	70.5	108	7	25.5	3.5	11	2.5	-45	12	-10.5	0.037234	0.141667	0.0178571	0.0612813	0.0126582	N/A	0.065586	0.0369698	1.01541	0.929995
169353	hsa-miR-5582-3p	N/A	N/A	68.5	107.5	65	71	66.5	89.5	6	-1.5	-7	-4.5	-2.5	-52.5	-0.833333	-19.8333	0.0319149	N/A	N/A	N/A	N/A	N/A	0.0319149	N/A	N/A	N/A
169193	hsa-miR-4725-5p	0.818295	0.40426	90	116.5	108.5	119.5	99	88	23.5	0	34	26	26	19.5	19.1667	23.8333	0.125	N/A	0.173469	0.144847	0.131646	0.0898618	0.149235	0.122118	0.229659	0.235051
169317	hsa-miR-3614-5p	N/A	N/A	64	83.5	51	83	68.5	54	-1	-40	-19.5	-14	-4	-13	-20.1667	-10.3333	N/A	N/A	N/A	N/A	N/A	N/A	N/A	N/A	N/A	N/A
169032	hsa-miR-4737	N/A	N/A	65.5	108	65.5	102.5	63.5	59.5	-0.5	-11	-5.5	13.5	-9.5	-8	-5.66667	-1.33333	N/A	N/A	N/A	0.0752089	N/A	N/A	N/A	0.0752089	N/A	N/A
168966		0.862305	0.359376	360	484.5	557.5	384	419	471.5	296.5	367	487	292.5	349	404.5	383.5	348.667	1.57713	2.03889	2.48469	1.62953	1.76709	1.86406	2.03357	1.75356	0.223158	0.0672054
168828		0.445677	0.443415	219	1080	231.5	280	248.5	332	153	962.5	158.5	187	167	264.5	424.667	206.167	0.81383	5.34722	0.808673	1.04178	0.84557	1.21889	2.32324	1.03542	1.12724	0.180356
169190		1.09719	0.917339	87.5	137	76.5	122	72	75	18.5	15.5	4.5	26	-0.5	1.5	12.8333	9	0.0984043	0.0861111	0.0229592	0.144847	N/A	0.00691244	0.0691582	0.0758796	0.585309	1.28538
168830		N/A	N/A	67	102	66	107	64.5	61	-0.5	-13	-7	10.5	-10.5	-14.5	-6.83333	-4.83333	N/A	N/A	N/A	0.0584958	N/A	N/A	N/A	0.0584958	N/A	N/A
169175		0.513197	0.130435	80	111	79	98.5	79.5	73.5	12.5	-7	9.5	6.5	4.5	-1	5	3.33333	0.0664894	N/A	0.0484694	0.0362117	0.0227848	N/A	0.0574794	0.0294983	0.22168	0.321858
168845		N/A	N/A	66	103	63	61.5	63	66	0.5	-16.5	-11	-19.5	-12	-21.5	-9	-17.6667	0.00265957	N/A	N/A	N/A	N/A	N/A	0.00265957	N/A	N/A	N/A
168694		0.225708	0.251751	100	253	96.5	92.5	84.5	121.5	34	133.5	22	16.5	12.5	17	63.1667	15.3333	0.180851	0.741667	0.112245	0.091922	0.0632911	0.078341	0.344921	0.0778514	1.0011	0.183962
168752		0.580048	0.108958	118	167.5	125	104	125.5	125	55	51	51.5	25.5	53	16.5	52.5	31.6667	0.292553	0.283333	0.262755	0.142061	0.268354	0.0760369	0.279547	0.162151	0.0545724	0.602649
169412	hsa-miR-1260a	1.47797	0.409195	7339	889	8509.5	7711.5	11324.5	6203	7278.5	776	8435.5	7634.5	11255	6007	5496.67	8298.83	38.7154	4.31111	43.0383	42.532	56.9873	27.682	28.6883	42.4005	0.739731	0.345588
17608	hsa-miR-425-5p	0.850429	0.609911	251	185.5	302.5	214	232.5	236.5	191	77.5	233	138.5	166	136.5	167.167	147	1.01596	0.430556	1.18878	0.771588	0.840506	0.629032	0.87843	0.747042	0.452374	0.144373
30787	hsa-miR-125b-5p	0.851805	0.158303	42009	33749	49204.5	32438	38126.5	41292.5	41950.5	33646.5	49135.5	32355	38057	41206.5	41577.5	37206.2	223.141	186.925	250.691	180.251	192.694	189.892	220.252	187.612	0.145202	0.0347911
11159	hsa-miR-518e-3p	N/A	N/A	66	99.5	69	67.5	61.5	69	7	-5	0.5	-17	-9.5	-6	0.833333	-10.8333	0.037234	N/A	0.00255102	N/A	N/A	N/A	0.0198925	N/A	1.23285	N/A
11218		0.578805	0.0532251	103	140	94	101.5	87.5	85.5	37	33.5	23	18	21	18	31.1667	19	0.196809	0.186111	0.117347	0.100279	0.106329	0.0829493	0.166756	0.096519	0.258595	0.125725
46572		0.12162	N/A	76.5	115.5	69.5	82	65	66.5	17	8	0.5	1	-1	-2.5	8.5	-0.833333	0.0904255	0.0444444	0.00255102	0.00557103	N/A	N/A	0.045807	0.00557103	0.959528	N/A
42613	ebv-miR-BART19-5p	0.255927	0.0480343	95	168	99.5	95.5	81	79	35	64	31.5	14	11	10	43.5	11.6667	0.18617	0.355556	0.160714	0.0779944	0.0556962	0.0460829	0.234147	0.0599245	0.452326	0.273186
42511		0.380753	0.157073	89	112	84	86.5	74	72.5	24	8	15.5	12	2.5	3.5	15.8333	6	0.12766	0.0444444	0.0790816	0.0668524	0.0126582	0.016129	0.0837286	0.0318799	0.499253	0.951595
11217		0.379622	0.0213379	81	118	79	82	76	75.5	18	15.5	11	7	6.5	4	14.8333	5.83333	0.0957447	0.0861111	0.0561224	0.0389972	0.0329114	0.0184332	0.0793261	0.0301139	0.260497	0.350787
46712		0.472026	0.020419	754	802.5	1171.5	435	496	525	691.5	698	1104	352.5	423	460	831.167	411.833	3.67819	3.87778	5.63265	1.96379	2.14177	2.11982	4.39621	2.07513	0.244628	0.0467652
17541	ebv-miR-BART1-5p	0.403948	0.239174	78	134	76	83	71.5	75	16	20.5	6.5	7.5	0	4.5	14.3333	4	0.0851064	0.113889	0.0331633	0.0417827	N/A	0.0207373	0.0773862	0.03126	0.528684	0.47605
17596		1.12356	0.556717	562.5	373	490.5	567.5	545	494.5	496.5	263.5	423	482.5	473	424	394.333	459.833	2.64096	1.46389	2.15816	2.68802	2.39494	1.95392	2.08767	2.34563	0.283422	0.157539
28250		0.24835	0.152106	73.5	108.5	81.5	81	73	68.5	14.5	4	12	2.5	2.5	-1.5	10.1667	1.16667	0.0771277	0.0222222	0.0612245	0.0139276	0.0126582	N/A	0.0535248	0.0132929	0.52781	0.0675221
11084	hsa-miR-372-3p	0.567128	0.329861	100	119.5	84	90	93	78	40	14.5	14	12.5	18	10	22.8333	13.5	0.212766	0.0805556	0.0714286	0.0696379	0.0911392	0.0460829	0.121583	0.0689534	0.650568	0.326829
17358	ebv-miR-BART16	0.568181	0.183356	91.5	159.5	93.5	98	93.5	89	30.5	54	25.5	23.5	21.5	21	36.6667	22	0.162234	0.3	0.130102	0.130919	0.108861	0.0967742	0.197445	0.112185	0.457121	0.15433
17312	hsa-miR-592	0.406246	0.0328994	85.5	135	83	88.5	76.5	75	19.5	25.5	15	10	8	7.5	20	8.5	0.103723	0.141667	0.0765306	0.0557103	0.0405063	0.0345622	0.107307	0.0435929	0.304878	0.250194
11171	hsa-miR-521	0.398446	N/A	72.5	103.5	74.5	76	72	69	10	-3.5	9.5	-3	4	-0.5	5.33333	0.166667	0.0531915	N/A	0.0484694	N/A	0.0202532	N/A	0.0508304	0.0202532	0.0656896	N/A
42803		0.543546	0.142503	117.5	218	135	113.5	109	132	58.5	113	66.5	35.5	39	65	79.3333	46.5	0.31117	0.627778	0.339286	0.197772	0.197468	0.299539	0.426078	0.231593	0.411291	0.25408
46301	hsa-miR-621	N/A	N/A	61.5	101.5	65	73	63.5	62.5	1.5	-6	-2	-2.5	-3.5	-4	-2.16667	-3.33333	0.00797872	N/A	N/A	N/A	N/A	N/A	0.00797872	N/A	N/A	N/A
14289		1.42163	0.467459	78	124.5	80.5	105.5	80	85.5	16.5	18	6.5	30.5	13	17	13.6667	20.1667	0.087766	0.1	0.0331633	0.169916	0.0658228	0.078341	0.0736431	0.104693	0.483226	0.542828
42524	hsa-miR-21-3p	0.964415	0.700738	273.5	283.5	292	281.5	250.5	315	215.5	175.5	226	199	179	248	205.667	208.667	1.14628	0.975	1.15306	1.10864	0.906329	1.14286	1.09145	1.05261	0.0924482	0.121442
14301	hsa-miR-361-5p	0.762222	0.286018	662	1093	720	571.5	746.5	722.5	601	990.5	652.5	491	678.5	650.5	748	606.667	3.19681	5.50278	3.32908	2.73538	3.43544	2.9977	4.00956	3.05617	0.322943	0.115726
46689	hsa-miR-1229-3p	0.511658	0.0691645	95	147	97	95	91	86	29	40.5	30	20.5	23.5	8.5	33.1667	17.5	0.154255	0.225	0.153061	0.114206	0.118987	0.0391705	0.177439	0.090788	0.232156	0.493082
46647	hsa-miR-1324	N/A	N/A	70	109.5	70.5	70	65.5	63.5	9.5	4	2.5	-4	-3	-9.5	5.33333	-5.5	0.0505319	0.0222222	0.0127551	N/A	N/A	N/A	0.0285031	N/A	0.68961	N/A
23524		0.33947	0.000560933	83.5	135.5	88.5	86	77	79.5	24	22.5	21	7.5	9.5	7	22.5	8	0.12766	0.125	0.107143	0.0417827	0.0481013	0.0322581	0.119934	0.040714	0.093027	0.19589
42611		0.537627	N/A	70.5	106.5	73	85.5	68.5	67.5	10	4.5	6	3.5	0	-0.5	6.83333	1	0.0531915	0.025	0.0306122	0.0194986	N/A	N/A	0.0362679	0.0194986	0.411451	N/A
42970	hsa-miR-744-3p	0.562429	0.0767586	81	131.5	90	91.5	88.5	82.5	20.5	26.5	20.5	7.5	20	13	22.5	13.5	0.109043	0.147222	0.104592	0.0417827	0.101266	0.0599078	0.120286	0.0676521	0.194818	0.450664
27740	hsa-miR-574-5p	1.14545	0.136086	297.5	300	325	316.5	335	391	233	192	256	233.5	264	325.5	227	274.333	1.23936	1.06667	1.30612	1.30084	1.33671	1.5	1.20405	1.37918	0.10263	0.0769719
46228		0.498071	0.345522	688.5	2299.5	716	652.5	645.5	785	628	2191.5	651.5	568	572.5	720.5	1157	620.333	3.34043	12.175	3.32398	3.16435	2.89873	3.32028	6.2798	3.12779	0.812987	0.0681428
11215		0.407885	0.0822875	125.5	230.5	128.5	115	106	101	65.5	122	63	36.5	37	34.5	83.5	36	0.348404	0.677778	0.321429	0.203343	0.187342	0.158986	0.449204	0.183224	0.441693	0.1226
11246		0.456521	0.463735	101	351.5	98.5	127.5	116	121.5	42	243	31	55.5	45	55	105.333	51.8333	0.223404	1.35	0.158163	0.309192	0.227848	0.253456	0.577189	0.263499	1.16092	0.157843
17904		0.624319	0.222616	444.5	761	372	388	371.5	355	385	650.5	307	304.5	295	287	447.5	295.5	2.04787	3.61389	1.56633	1.69638	1.49367	1.32258	2.40936	1.50421	0.44434	0.124399
11273		1.10061	0.716967	470.5	345.5	560	391	650	490	401.5	237.5	493.5	304	577.5	424.5	377.5	435.333	2.13564	1.31944	2.51786	1.69359	2.92405	1.95622	1.99098	2.19129	0.307468	0.295732
19583		0.537696	0.115423	195.5	318	177	162.5	165	156	136	213.5	110.5	89.5	90	81.5	153.333	87	0.723404	1.18611	0.563776	0.498607	0.455696	0.375576	0.82443	0.443293	0.392069	0.140869
11141	hsa-miR-509-3p	0.329565	0.00320536	96.5	150.5	98.5	88	84	84.5	38	43.5	33	11	15	14	38.1667	13.3333	0.202128	0.241667	0.168367	0.0612813	0.0759494	0.0645161	0.204054	0.0672489	0.179794	0.114595
42766	hsa-miR-554	0.74974	0.641013	93.5	154	73	107	89	86.5	33.5	49	4	30.5	17.5	20.5	28.8333	22.8333	0.178191	0.272222	0.0204082	0.169916	0.0886076	0.09447	0.156941	0.117665	0.810784	0.385385
17896		0.725967	0.23039	659	995.5	601	601	516.5	664.5	598	888	533	513.5	444.5	597.5	673	518.5	3.18085	4.93333	2.71939	2.86072	2.25063	2.75346	3.61119	2.6216	0.323446	0.124243
46501	hsa-miR-1305	0.359101	0.0802361	74.5	130	82	87	74.5	69	16	25.5	13.5	11	7.5	1.5	18.3333	6.66667	0.0851064	0.141667	0.0688776	0.0612813	0.0379747	0.00691244	0.0985502	0.0353895	0.387736	0.770751
17272	hsa-miR-551a	1.20559	0.100888	161	197	151	183.5	193	183	96	94	83.5	109	125.5	112	91.1667	115.5	0.510638	0.522222	0.42602	0.607242	0.635443	0.516129	0.486294	0.586271	0.107998	0.106367
42479		0.46588	0.0878547	113.5	203	129.5	106	103	111.5	53.5	99.5	56.5	32	31.5	40.5	69.8333	34.6667	0.284574	0.552778	0.288265	0.178273	0.159494	0.186636	0.375206	0.174801	0.409889	0.0795206
42965	hsa-miR-424-5p	1.42357	0.405135	4810	1135.5	8168.5	5179.5	8246	7247	4743.5	1028.5	8101	5098.5	8175.5	7181	4624.33	6818.33	25.2314	5.71389	41.3316	28.4039	41.3949	33.0922	24.0923	34.297	0.740327	0.191818
42913		0.51039	0.113495	93.5	148	100.5	103.5	84.5	76.5	28.5	38	26	26	14.5	7.5	30.8333	16	0.151596	0.211111	0.132653	0.144847	0.0734177	0.0345622	0.16512	0.0842756	0.247942	0.663754
42683	hsa-miR-922	0.214098	0.03385	79	140	89	83	79.5	81.5	16.5	32	20.5	1	10	5	23	5.33333	0.087766	0.177778	0.104592	0.00557103	0.0506329	0.0230415	0.123379	0.0264151	0.387883	0.860097
28450		0.659288	0.224132	161.5	279	158	157.5	162.5	159	101.5	173	92	80	93	83	122.167	85.3333	0.539894	0.961111	0.469388	0.445682	0.470886	0.382488	0.656797	0.433019	0.404829	0.105166
28684	spike_control_v2_37	0.497055	0.0359094	2451	2939.5	1808	1312.5	1279	1246.5	2386	2813	1737	1241.5	1211	1179	2312	1210.5	12.6915	15.6278	8.86224	6.91643	6.13165	5.43318	12.3938	6.16042	0.273731	0.120454
46514		0.69981	0.398112	5845	13777.5	7205.5	6556.5	8148.5	5124	5785.5	13670	7139.5	6470	8078	5040.5	8865	6529.5	30.7739	75.9444	36.426	36.0446	40.9013	23.2281	47.7148	33.3913	0.515781	0.273438
42865	hsa-miR-181a-5p	1.54098	0.213271	1697	425	1826.5	1845	2144	2158	1637.5	319	1758	1772.5	2073.5	2083.5	1238.17	1976.5	8.71011	1.77222	8.96939	9.87465	10.4987	9.60138	6.48391	9.99159	0.629635	0.046035
42894		0.415717	0.213738	98.5	210	105	107	93	97.5	36.5	100.5	36.5	29	21.5	26	57.8333	25.5	0.194149	0.558333	0.186224	0.16156	0.108861	0.119816	0.312902	0.130079	0.679402	0.21378
42667	hsa-miR-302b-5p	0.524371	0.360299	83	123	70.5	83.5	77	70	16	17	1.5	7	8.5	3.5	11.5	6.33333	0.0851064	0.0944444	0.00765306	0.0389972	0.043038	0.016129	0.0624013	0.0327214	0.763489	0.443464
10138	hsa-miR-130a-3p	0.923497	0.573743	1823	2138.5	2752	1746.5	2382.5	2399.5	1763	2034.5	2681	1664	2313	2332.5	2159.5	2103.17	9.37766	11.3028	13.6786	9.27019	11.7114	10.7488	11.453	10.5768	0.188107	0.11626
30681		1.09753	0.349333	241	344.5	302.5	298	337	342	182.5	231	235	211	266.5	274.5	216.167	250.667	0.970745	1.28333	1.19898	1.17549	1.34937	1.26498	1.15102	1.26328	0.140501	0.0688307
30831		0.923475	0.840522	468	945.5	373.5	583	461	714	405.5	837	305	499	391.5	642.5	515.833	511	2.15691	4.65	1.55612	2.77994	1.98228	2.96083	2.78768	2.57435	0.588502	0.202251
46381	hsa-miR-1298-5p	1.06382	0.686016	273.5	269.5	219.5	295	251.5	255.5	204.5	164.5	151.5	212.5	178.5	187.5	173.5	192.833	1.08777	0.913889	0.772959	1.18384	0.903797	0.864055	0.924871	0.983899	0.1705	0.177146
42523	hsa-miR-26b-3p	0.628656	0.0539371	101	151.5	98.5	102.5	99	88	33	42	31.5	21	28.5	21	35.5	23.5	0.175532	0.233333	0.160714	0.116992	0.144304	0.0967742	0.18986	0.119357	0.202103	0.199846
42892	hsa-miR-450b-3p	0.47315	0.0296898	100.5	156	100	101.5	90	88	37.5	49.5	32.5	19	23	17.5	39.8333	19.8333	0.199468	0.275	0.165816	0.10585	0.116456	0.0806452	0.213428	0.100983	0.261983	0.182154
42824	ebv-miR-BART9-5p	0.687135	0.464292	134.5	300	135	151.5	143.5	167.5	75.5	192.5	67.5	77	72	98.5	111.833	82.5	0.401596	1.06944	0.344388	0.428969	0.364557	0.453917	0.605143	0.415814	0.666146	0.11089
17606	kshv-miR-K12-4-5p	0.425254	0.154672	75.5	116	84	91.5	69	69	15.5	8.5	18	9	2.5	-0.5	14	3.66667	0.0824468	0.0472222	0.0918367	0.0501393	0.0126582	N/A	0.0738353	0.0313988	0.318559	0.844081
42927		0.684549	0.144276	148	163	120.5	135.5	109	117	87	57	55	52.5	40.5	49.5	66.3333	47.5	0.462766	0.316667	0.280612	0.292479	0.205063	0.228111	0.353348	0.241884	0.272983	0.187306
42861		0.115937	0.251951	76	180.5	78.5	84.5	74	76	11.5	69	10	2.5	4.5	4.5	30.1667	3.83333	0.0611702	0.383333	0.0510204	0.0139276	0.0227848	0.0207373	0.165175	0.0191499	1.14424	0.242147
46925	hsa-miR-1277-3p	0.714548	0.572584	76.5	118.5	85	96	72.5	67.5	18.5	9.5	8.5	13	4	-1	12.1667	5.33333	0.0984043	0.0527778	0.0433673	0.0724234	0.0202532	N/A	0.0648498	0.0463383	0.453933	0.7961
46832	hsa-miR-1202	0.30267	0.0603366	90.5	148.5	88.5	91.5	80	74.5	28.5	40.5	17.5	12.5	10	4.5	28.8333	9	0.151596	0.225	0.0892857	0.0696379	0.0506329	0.0207373	0.155294	0.0470027	0.437446	0.524471
42614		0.636308	0.0106733	99	134	110.5	96	89.5	94.5	31	30.5	40.5	19.5	21.5	27.5	34	22.8333	0.164894	0.169444	0.206633	0.108635	0.108861	0.126728	0.180324	0.114741	0.126981	0.0904772
146064	hsa-miR-718	0.659558	0.13411	151	223.5	141	140	129.5	141	85.5	117	69	54.5	62	74.5	90.5	63.6667	0.454787	0.65	0.352041	0.303621	0.313924	0.343318	0.485609	0.320288	0.311674	0.064315
146091	hsa-miR-1914-5p	0.297611	0.00266345	219.5	286.5	276	117.5	131	126.5	137	178.5	199	40	64	58	171.5	54	0.728723	0.991667	1.01531	0.222841	0.324051	0.267281	0.911899	0.271391	0.174443	0.186925
42780	hsa-miR-1307-5p	0.608251	0.0838438	96.5	137.5	89.5	90	91.5	96	34.5	28.5	22.5	11.5	24	20	28.5	18.5	0.183511	0.158333	0.114796	0.0640669	0.121519	0.0921659	0.152213	0.0925839	0.228388	0.310295
145866		N/A	N/A	64.5	101	65	68	60	61.5	2.5	-8.5	-3	-6.5	-7.5	-10.5	-3	-8.16667	0.0132979	N/A	N/A	N/A	N/A	N/A	0.0132979	N/A	N/A	N/A
46205	SNORD48	0.489717	0.37453	472	2566.5	1016	461	853	944.5	413.5	2463	946	386.5	785	871	1274.17	680.833	2.19947	13.6833	4.82653	2.1532	3.97468	4.01382	6.90311	3.38057	0.871632	0.314477
29138	spike_control_v2_42	0.572302	0.0264858	6729	7108.5	5083.5	3777.5	3964.5	3736	6668	7003	5015	3704.5	3895.5	3655.5	6228.67	3751.83	35.4681	38.9056	25.5867	20.6379	19.7241	16.8456	33.3201	19.0692	0.207512	0.103787
146192		0.103061	0.369538	144.5	2209.5	165.5	132.5	147.5	191.5	84	2100	97.5	59.5	77	125.5	760.5	87.3333	0.446809	11.6667	0.497449	0.331476	0.389873	0.578341	4.20364	0.43323	1.53753	0.297803
42802		0.626907	0.0310262	115.5	157.5	120.5	113	108	92.5	53.5	49	52.5	37.5	39	24	51.6667	33.5	0.284574	0.272222	0.267857	0.208914	0.197468	0.110599	0.274885	0.172327	0.0315436	0.311985
145872		0.134242	0.189689	75	118.5	68.5	79	69	64.5	16.5	14.5	2.5	2	1	-2.5	11.1667	0.166667	0.087766	0.0805556	0.0127551	0.0111421	0.00506329	N/A	0.0603589	0.00810268	0.685623	0.530484
146036		0.61172	0.437431	81	129	78	99.5	73	74	17.5	17.5	8.5	19	0.5	7.5	14.5	9	0.0930851	0.0972222	0.0433673	0.10585	0.00253165	0.0345622	0.0778916	0.0476478	0.38477	1.10996
146017		0.717942	0.245145	89.5	137.5	83.5	107	86.5	91.5	30.5	30	18.5	24	14.5	21	26.3333	19.8333	0.162234	0.166667	0.0943878	0.133705	0.0734177	0.0967742	0.141096	0.101299	0.287119	0.300074
28488	spike_control_v2_34	0.81514	0.729949	3294.5	207.5	2509.5	1843	1580.5	1624	3236	96	2442.5	1760	1510.5	1556	1924.83	1608.83	17.2128	0.533333	12.4617	9.80501	7.6481	7.17051	10.0693	8.20787	0.853412	0.17101
145934		0.518101	0.29772	110.5	203	94	116.5	98.5	91.5	43.5	90.5	24	33	29.5	24	52.6667	28.8333	0.231383	0.502778	0.122449	0.183844	0.149367	0.110599	0.285537	0.147937	0.685944	0.247697
146020	hsa-miR-449c-3p	0.257002	0.0564137	77.5	141	81.5	83.5	79	73	17	31	14	4.5	7	5.5	20.6667	5.66667	0.0904255	0.172222	0.0714286	0.0250696	0.035443	0.0253456	0.111359	0.0286194	0.480953	0.206539
28098	spike_control_v2_31	0.574541	0.18919	2175	3850.5	1848	1787.5	1457	1615.5	2114	3745	1779.5	1702	1385	1548.5	2546.17	1545.17	11.2447	20.8056	9.07908	9.48189	7.01266	7.13594	13.7098	7.87683	0.455135	0.176643
14258	hsa_negative_control_1	0.701391	0.254924	100	160.5	97.5	111.5	101.5	102	40	57.5	29.5	33.5	29.5	31	42.3333	31.3333	0.212766	0.319444	0.15051	0.18663	0.149367	0.142857	0.227574	0.159618	0.375417	0.147967
145660		0.624963	0.0170283	671.5	727.5	562.5	447	414	499	607	622	495.5	363	344.5	432	574.833	379.833	3.22872	3.45556	2.52806	2.02228	1.7443	1.99078	3.07078	1.91912	0.157451	0.0793152
145990	ebv-miR-BART21-3p	0.294773	0.163996	91.5	198.5	105.5	91.5	87	84.5	29	89	32	12.5	18.5	16.5	50	15.8333	0.154255	0.494444	0.163265	0.0696379	0.0936709	0.0760369	0.270655	0.0797819	0.716261	0.156006
146003		0.377316	0.095565	85.5	145	88.5	84.5	83	79	21	39	17.5	7	12.5	12	25.8333	10.5	0.111702	0.216667	0.0892857	0.0389972	0.0632911	0.0552995	0.139218	0.0525293	0.488459	0.235709
145717	hsa-miR-516a-3p/hsa-miR-516b-3p	0.353823	0.0444541	91.5	141	92	86	79	77.5	24.5	35.5	18.5	12	9	8	26.1667	9.66667	0.130319	0.197222	0.0943878	0.0668524	0.0455696	0.0368664	0.140643	0.0497628	0.371073	0.310001
145944		1.47937	0.311557	2052.5	717.5	3550	2388.5	3542.5	3659	1993	612.5	3479.5	2306	3472	3592	2028.33	3123.33	10.6011	3.40278	17.7526	12.8468	17.5797	16.553	10.5855	15.6598	0.677807	0.158985
145984	ebv-miR-BART2-3p	0.481905	0.539263	211	1209.5	172	331.5	211.5	364	129.5	1099	85	246.5	145.5	298	437.833	230	0.68883	6.10556	0.433673	1.37326	0.736709	1.37327	2.40935	1.16108	1.32963	0.31653
145760		0.802693	0.435657	333.5	544	441	237.5	476	468.5	269.5	432.5	373.5	164.5	408	353	358.5	308.5	1.43351	2.40278	1.90561	0.916435	2.06582	1.62673	1.91397	1.53633	0.253237	0.377525
146009	hsa-miR-376a-3p	1.39124	0.492587	295	114.5	384.5	331	383.5	318	232.5	8.5	315.5	250.5	316.5	223	185.5	263.333	1.2367	0.0472222	1.60969	1.39554	1.60253	1.02765	0.964539	1.34191	0.846017	0.216982
145785	hsa-miR-526b-3p	N/A	N/A	75.5	112	71.5	73	65.5	71.5	9.5	8.5	2	-5	-1.5	-5.5	6.66667	-4	0.0505319	0.0472222	0.0102041	N/A	N/A	N/A	0.0359861	N/A	0.62216	N/A
145641	hsa-miR-369-5p	0.912813	0.582372	131	173.5	171.5	140.5	149.5	154	65.5	67.5	105	68.5	82	76.5	79.3333	75.6667	0.348404	0.375	0.535714	0.381616	0.41519	0.352535	0.419706	0.383113	0.24146	0.0818413
145842	hsa-miR-658	0.335357	0.229272	80	138.5	73.5	85	73	73	16.5	29.5	9.5	7.5	5	0	18.5	4.16667	0.087766	0.163889	0.0484694	0.0417827	0.0253165	N/A	0.100041	0.0335496	0.586565	0.347051
146086	hsa-miR-30a-5p	2.08751	0.0296238	645	308	824.5	979	1207.5	1411	583	204	757.5	892	1139.5	1338.5	514.833	1123.33	3.10106	1.13333	3.8648	4.96936	5.76962	6.1682	2.69973	5.63573	0.522001	0.108333
145905	hsa-miR-518a-5p/hsa-miR-527	0.760456	0.440336	104	137	93	115.5	92.5	85.5	44	34.5	24	38	25.5	16.5	34.1667	26.6667	0.234043	0.191667	0.122449	0.211699	0.129114	0.0760369	0.182719	0.13895	0.308299	0.492004
147854	hsa-miR-548u	0.211533	N/A	71.5	106	69	69	70	60.5	9	-1	0	-8	2	-10.5	2.66667	-5.5	0.0478723	N/A	N/A	N/A	0.0101266	N/A	0.0478723	0.0101266	N/A	N/A
147835	hsa-miR-3143	N/A	N/A	63.5	99.5	63.5	65.5	66	62	4.5	-9	-3	-9.5	-6	-6.5	-2.5	-7.33333	0.0239362	N/A	N/A	N/A	N/A	N/A	0.0239362	N/A	N/A	N/A
147510		N/A	N/A	75.5	129	71.5	71.5	69.5	66	13.5	17	6	-3	0	0	12.1667	-1	0.0718085	0.0944444	0.0306122	N/A	N/A	N/A	0.0656217	N/A	0.493171	N/A
147796	hsa-miR-4327	0.181958	0.00825943	86	133	88.5	79	78	70.5	18.5	29	21	4	6.5	2.5	22.8333	4.33333	0.0984043	0.161111	0.107143	0.0222841	0.0329114	0.0115207	0.122219	0.0222388	0.277889	0.480935
147776	hsa-miR-4317	1.05854	0.832226	986	727	1394.5	771	1437.5	1223.5	925	622.5	1329	687	1363	1154	958.833	1068	4.92021	3.45833	6.78061	3.8273	6.90127	5.31797	5.05305	5.34885	0.329527	0.287392
147840	hsv2-miR-H9-3p	0.735892	0.431181	125.5	230	121.5	138	144.5	123	63	124	55.5	64.5	68.5	55.5	80.8333	62.8333	0.335106	0.688889	0.283163	0.359331	0.346835	0.25576	0.43572	0.320642	0.506711	0.17632
147901	kshv-miR-K12-7-5p	0.67315	0.576692	92	134.5	78	113.5	81.5	73	33	26	11.5	36	8	3	23.5	15.6667	0.175532	0.144444	0.0586735	0.200557	0.0405063	0.0138249	0.126217	0.0849628	0.479525	1.18867
147941	hsa-miR-3160-3p	0.798759	0.739319	78	122	70	93.5	72	75.5	18.5	12	2	15	2.5	9.5	10.8333	9	0.0984043	0.0666667	0.0102041	0.0835655	0.0126582	0.0437788	0.058425	0.0466675	0.764637	0.761596
147767	hsa-miR-4279	0.683094	0.280466	939	1871.5	1073.5	938.5	894	1028	877	1764.5	996	854	824.5	959.5	1212.5	879.333	4.66489	9.80278	5.08163	4.75766	4.17468	4.42166	6.51643	4.45133	0.43792	0.0657374
147832	hsa-miR-4326	0.436824	0.109721	88.5	135	89	93.5	74.5	73	20	28.5	13.5	14.5	6	7.5	20.6667	9.33333	0.106383	0.158333	0.0688776	0.0807799	0.0303797	0.0345622	0.111198	0.048574	0.403981	0.575812
147851	hsa-miR-3201	0.921075	0.67243	207	187	190.5	185.5	182.5	150	121	75	116.5	103	113.5	81.5	104.167	99.3333	0.643617	0.416667	0.594388	0.573816	0.574684	0.375576	0.551557	0.508025	0.216448	0.225786
147706	hsa-miR-4255	0.368605	0.218082	88	164.5	91	100	80.5	77.5	26.5	60.5	14.5	16	12.5	11	33.8333	13.1667	0.140957	0.336111	0.0739796	0.0891365	0.0632911	0.0506912	0.183683	0.0677063	0.741434	0.289474
147821	hsa-miR-3169	0.519582	0.197603	92.5	150	95.5	106	79.5	81	24.5	43.5	20	23.5	10.5	13.5	29.3333	15.8333	0.130319	0.241667	0.102041	0.130919	0.0531646	0.062212	0.158009	0.0820986	0.467167	0.517929
147654	hsa-miR-3138	0.380723	0.141239	81	137.5	82.5	91.5	79.5	72	19.5	34.5	11.5	7.5	12	7	21.8333	8.83333	0.103723	0.191667	0.0586735	0.0417827	0.0607595	0.0322581	0.118021	0.0449334	0.573114	0.322913
147623	hsa-miR-4304	0.72255	N/A	78.5	115	74.5	82.5	68	85	16.5	9	7	7.5	-3	-11.5	10.8333	-2.33333	0.087766	0.05	0.0357143	0.0417827	N/A	N/A	0.0578267	0.0417827	0.465079	N/A
147836	hsv2-miR-H7-5p	0.698002	0.432998	222.5	432.5	194.5	254	169.5	289.5	156	322	126.5	165.5	99.5	185	201.5	150	0.829787	1.78889	0.645408	0.922006	0.503797	0.852535	1.08803	0.759446	0.564254	0.295092
148683	hsa-miR-888-3p	0.432387	0.337744	78.5	130.5	75	88.5	72	72	15.5	22.5	6	10.5	2	-8.5	14.6667	1.33333	0.0824468	0.125	0.0306122	0.0584958	0.0101266	N/A	0.079353	0.0343112	0.595691	0.996824
148467	hsa-miR-3939	0.0668234	N/A	73.5	109.5	75	80	62.5	74	8	-4.5	8	0.5	-6	-9	3.83333	-4.83333	0.0425532	N/A	0.0408163	0.00278552	N/A	N/A	0.0416848	0.00278552	0.0294628	N/A
14261	spike_control_v1_a	0.80261	0.640934	84.5	123.5	73	95.5	81	89.5	24.5	19	6.5	19.5	13	9	16.6667	13.8333	0.130319	0.105556	0.0331633	0.108635	0.0658228	0.0414747	0.0896793	0.0719775	0.562964	0.472378
147986		0.687252	0.241053	1047	792.5	543.5	662.5	491.5	640	984	679.5	475	573.5	427	542.5	712.833	514.333	5.23404	3.775	2.42347	3.19499	2.16203	2.5	3.81084	2.619	0.368851	0.201093
148319		0.374413	0.0731964	116	216	193.5	99.5	110	133.5	47.5	111	123.5	20	42	51.5	94	37.8333	0.25266	0.616667	0.630102	0.111421	0.212658	0.237327	0.499809	0.187135	0.42845	0.356538
148387	hsa-miR-3942-5p	0.0744829	N/A	108	114.5	75.5	69	69	62.5	40	8.5	9	-4	1.5	-4.5	19.1667	-2.33333	0.212766	0.0472222	0.0459184	N/A	0.00759494	N/A	0.101969	0.00759494	0.941026	N/A
148658		0.67627	N/A	73	115.5	78	72	74	66	10	5.5	10	0	6	-4.5	8.5	0.5	0.0531915	0.0305556	0.0510204	N/A	0.0303797	N/A	0.0449225	0.0303797	0.278021	N/A
148004		0.407691	0.0483865	100.5	132	90	82.5	83	82	35.5	25	19.5	7.5	17.5	9.5	26.6667	11.5	0.18883	0.138889	0.0994898	0.0417827	0.0886076	0.0437788	0.142403	0.0580564	0.314415	0.456056
148671		0.530808	0.0163893	473	669	652.5	303	413	378.5	411	563.5	585	222.5	341.5	312	519.833	292	2.18617	3.13056	2.98469	1.23955	1.72911	1.43779	2.76714	1.46882	0.183725	0.167652
148285	hsa-miR-3941	0.243051	0.347409	143.5	771.5	155	132	134.5	167	82	662	86.5	60	63	98.5	276.833	73.8333	0.43617	3.67778	0.441327	0.334262	0.318987	0.453917	1.51842	0.369055	1.23158	0.200209
148466	hsa-miR-3937	0.52487	0.138047	88.5	124.5	89	98.5	81	74	24	16.5	22.5	19	11	3	21	11	0.12766	0.0916667	0.114796	0.10585	0.0556962	0.0138249	0.111374	0.0584569	0.163762	0.788178
148682	hsa-miR-483-3p	0.610886	0.313489	1514	3634	1597	1408.5	1495	1562	1444.5	3526.5	1531.5	1325.5	1418.5	1490.5	2167.5	1411.5	7.68351	19.5917	7.81378	7.3844	7.18228	6.86866	11.6963	7.14511	0.584618	0.0363702
148264	hsa-miR-3665	1.09489	0.786279	120.5	137.5	108	139.5	121.5	103	58	23.5	41.5	55	52	31	41	46	0.308511	0.130556	0.211735	0.306407	0.263291	0.142857	0.216934	0.237518	0.410685	0.356882
148640	hsa-miR-34b-3p	0.573233	0.386628	88	187.5	90.5	108.5	93	96	28	79	22.5	26	25	28.5	43.1667	26.5	0.148936	0.438889	0.114796	0.144847	0.126582	0.131336	0.234207	0.134255	0.760352	0.0705792
148327	hsa-miR-3651	1.40374	0.231834	588.5	309.5	744.5	708.5	692	861	519.5	203.5	674	628	622	791	465.667	680.333	2.7633	1.13056	3.43878	3.49861	3.14937	3.64516	2.44421	3.43105	0.485528	0.0742364
147555	hsv2-miR-H19	0.296969	0.090523	86	127	78.5	92.5	72	73	22	22.5	8.5	10.5	2	3.5	17.6667	5.33333	0.117021	0.125	0.0433673	0.0584958	0.0101266	0.016129	0.0951295	0.0282505	0.473087	0.933245
148486		0.394736	0.318604	76.5	122.5	75	90.5	70.5	69	11	19.5	6	8.5	0	1	12.1667	3.16667	0.0585106	0.108333	0.0306122	0.0473538	N/A	0.00460829	0.0658187	0.025981	0.598197	1.16337
148279		2.72743	N/A	69.5	107.5	73	89	66.5	60	6.5	1.5	3	9.5	-4	-5	3.66667	0.166667	0.0345745	0.00833333	0.0153061	0.0529248	N/A	N/A	0.0194046	0.0529248	0.700461	N/A
148035		0.357319	0.437901	145	952	200.5	188.5	209	225	61.5	847.5	125	108.5	139	156	344.667	134.5	0.327128	4.70833	0.637755	0.604457	0.703797	0.718894	1.89107	0.675716	1.29279	0.0920094
148158		2.09486	0.000254397	426	422	477	857.5	855	892.5	365.5	318	406	775	786	828	363.167	796.333	1.94415	1.76667	2.07143	4.31755	3.97975	3.81567	1.92741	4.03765	0.0794165	0.063379
148611		0.230924	N/A	86	112.5	80	77.5	67.5	92.5	23	6.5	11.5	3	-1.5	-11.5	13.6667	-3.33333	0.12234	0.0361111	0.0586735	0.0167131	N/A	N/A	0.072375	0.0167131	0.617861	N/A
148615		0.0688447	N/A	72.5	108	73.5	75.5	68	71.5	11.5	1.5	8	-3.5	0.5	-16.5	7	-6.5	0.0611702	0.00833333	0.0408163	N/A	0.00253165	N/A	0.0367733	0.00253165	0.724696	N/A
148012	hsa-miR-203b-3p	0.259493	0.38267	87.5	112.5	73	84	71	83	25	5	5.5	4.5	1.5	-1.5	11.8333	1.5	0.132979	0.0277778	0.0280612	0.0250696	0.00759494	N/A	0.0629392	0.0163323	0.963725	0.756568
148070		N/A	N/A	71.5	103.5	71.5	70.5	65	73.5	5.5	-0.5	4	-11.5	-3.5	-7.5	3	-7.5	0.0292553	N/A	0.0204082	N/A	N/A	N/A	0.0248317	N/A	0.251931	N/A
148582		0.418756	0.133132	86	138	84.5	89	76.5	80	20	31	16.5	10	9	-4.5	22.5	4.83333	0.106383	0.172222	0.0841837	0.0557103	0.0455696	N/A	0.12093	0.05064	0.378621	0.141599
148528		0.97883	0.940692	285	519	279	382.5	357.5	387.5	220.5	416	210	293.5	291.5	292.5	282.167	292.5	1.17287	2.31111	1.07143	1.6351	1.47595	1.34793	1.51847	1.48632	0.453297	0.0967934
148578		0.488932	0.247656	349	791.5	306	299	260.5	290	281.5	685.5	240.5	219.5	195	213.5	402.5	209.333	1.49734	3.80833	1.22704	1.22284	0.987342	0.983871	2.17757	1.06468	0.651521	0.128656
148130		0.206038	N/A	78.5	117	87	80.5	71.5	70.5	15	8	19	-1.5	3	-3	14	-0.5	0.0797872	0.0444444	0.0969388	N/A	0.0151899	N/A	0.0737235	0.0151899	0.363078	N/A
148258		0.215019	0.0780215	99.5	143	81	83.5	80.5	74	36	35	11.5	1.5	14.5	3	27.5	6.33333	0.191489	0.194444	0.0586735	0.00835655	0.0734177	0.0138249	0.148202	0.0318664	0.52326	1.13249
148283		0.206838	0.165485	123	134	76	90	75	72.5	60	30	8	11	8.5	1	32.6667	6.83333	0.319149	0.166667	0.0408163	0.0612813	0.043038	0.00460829	0.175544	0.0363092	0.793981	0.796754
148067		0.163984	N/A	78.5	117.5	74.5	84.5	65.5	63	13.5	15.5	9	2	-2	-4	12.6667	-1.33333	0.0718085	0.0861111	0.0459184	0.0111421	N/A	N/A	0.067946	0.0111421	0.299839	N/A
148172	hsa-miR-216a-3p	0.969629	0.915886	110.5	148.5	92	128	99.5	98	44	38	25.5	48	30.5	29.5	35.8333	36	0.234043	0.211111	0.130102	0.267409	0.15443	0.135945	0.191752	0.185928	0.284783	0.382769
148689		0.258719	0.296808	100.5	272	94.5	113.5	84.5	85	35	169	28	33.5	12	17.5	77.3333	21	0.18617	0.938889	0.142857	0.18663	0.0607595	0.0806452	0.422639	0.109345	1.05908	0.618824
148191		0.16996	0.366884	90	370.5	85	109	87.5	87.5	22.5	258.5	16	23.5	15	15.5	99	18	0.119681	1.43611	0.0816327	0.130919	0.0759494	0.0714286	0.545808	0.0927657	1.41306	0.357019
148094		0.564997	0.490134	165.5	583.5	162	218	195.5	213.5	107	469.5	92.5	134	126	147	223	135.667	0.569149	2.60833	0.471939	0.746518	0.637975	0.677419	1.21647	0.687304	0.99169	0.0799394
148419		0.232943	0.182881	77	160	83	94	71.5	70.5	14.5	49.5	14.5	10.5	3.5	5	26.1667	6.33333	0.0771277	0.275	0.0739796	0.0584958	0.0177215	0.0230415	0.142036	0.0330863	0.81079	0.66993
148503		0.55312	0.147283	73.5	115	80	90	68.5	68	9.5	8	6.5	6	-3	3	8	2	0.0505319	0.0444444	0.0331633	0.0334262	N/A	0.0138249	0.0427132	0.0236255	0.206325	0.586662
148605		0.647948	0.440322	77.5	109	80	87	73	65.5	10.5	3	7.5	4.5	4.5	-1	7	2.66667	0.0558511	0.0166667	0.0382653	0.0250696	0.0227848	N/A	0.0369277	0.0239272	0.531483	0.0675221
148025		3.39813	N/A	75.5	116	78	105.5	71	66	6	9.5	7.5	25	-1	-1.5	7.66667	7.5	0.0319149	0.0527778	0.0382653	0.139276	N/A	N/A	0.040986	0.139276	0.260924	N/A
148661	hsa-miR-486-3p	0.620424	0.175444	84	130.5	87	100	79	74.5	22	23.5	16.5	20	10	9.5	20.6667	13.1667	0.117021	0.130556	0.0841837	0.111421	0.0506329	0.0437788	0.110587	0.0686108	0.215633	0.542662
148429		1.04647	0.853314	143.5	220.5	145	190.5	158	147	82	113	70	115	93	81.5	88.3333	96.5	0.43617	0.627778	0.357143	0.640669	0.470886	0.375576	0.473697	0.49571	0.293786	0.270881
148407		0.402945	0.129439	82.5	121.5	85	90	70	66.5	17	15.5	9	8	3	-1.5	13.8333	3.16667	0.0904255	0.0861111	0.0459184	0.0445682	0.0151899	N/A	0.0741517	0.0298791	0.331021	0.695258
148442		0.159638	N/A	81.5	121.5	76	71	72	77	12	14.5	9	-2	2	-27	11.8333	-9	0.0638298	0.0805556	0.0459184	N/A	0.0101266	N/A	0.0634346	0.0101266	0.273068	N/A
42499		0.369099	0.11839	117.5	207	116	104.5	105	98.5	47	98	50	29.5	39.5	5	65	24.6667	0.25	0.544444	0.255102	0.164345	0.2	0.0230415	0.349849	0.129129	0.481763	0.724764
145759	hsa-miR-181c-3p	0.412763	0.0732379	88	121.5	88.5	91	79.5	84.5	26.5	13	22	12.5	10.5	2.5	20.5	8.5	0.140957	0.0722222	0.112245	0.0696379	0.0531646	0.0115207	0.108475	0.0447744	0.318252	0.668982
17835	hsa-miR-450a-5p	0.892686	0.743636	175.5	141	160.5	155	147.5	141.5	108.5	34	90.5	76.5	79.5	58	77.6667	71.3333	0.577128	0.188889	0.461735	0.426184	0.402532	0.267281	0.40925	0.365332	0.487158	0.234675
42732	hsa-miR-532-3p	0.587758	0.0174424	108.5	143	108.5	101.5	96	101	38.5	40	36	25	27	18	38.1667	23.3333	0.204787	0.222222	0.183673	0.139276	0.136709	0.0829493	0.203561	0.119645	0.0948296	0.265829
145734	hsa-miR-33b-3p	0.0647833	N/A	75	115	74.5	79	70	71	11.5	5.5	5	-3	0.5	0	7.33333	-0.833333	0.0611702	0.0305556	0.0255102	N/A	0.00253165	N/A	0.0390787	0.00253165	0.49381	N/A
42493	hsa-miR-892b	0.215189	0.015458	94	140.5	86.5	84.5	74.5	76.5	30	32	17.5	3.5	7	8	26.5	6.16667	0.159574	0.177778	0.0892857	0.0194986	0.035443	0.0368664	0.142213	0.0306027	0.328599	0.315093
168878	hsa-miR-5100	0.95411	0.470373	65535	65535	65535	65535	65535	65535	65469	65427	65466.5	65451.5	65466.5	65455.5	65454.2	65457.8	348.239	363.483	334.013	364.632	331.476	301.638	348.578	332.582	0.0422809	0.0947483
168605	hsa-miR-4653-3p	0.578908	0.46148	258	759.5	209	295.5	211	328.5	193.5	649.5	143.5	212.5	143.5	260	328.833	205.333	1.02926	3.60833	0.732143	1.18384	0.726582	1.19816	1.78991	1.03619	0.883727	0.258858
168856	hsa-miR-4494	N/A	N/A	71.5	106.5	65.5	79.5	63	61.5	5	1	-2	-2	-5.5	-6.5	1.33333	-4.66667	0.0265957	0.00555556	N/A	N/A	N/A	N/A	0.0160757	N/A	0.925478	N/A
168558	hsa-miR-5585-3p	0.958264	N/A	70.5	97	70	85.5	69.5	62	6	-6	4	4.5	-5.5	-7	1.33333	-2.66667	0.0319149	N/A	0.0204082	0.0250696	N/A	N/A	0.0261615	0.0250696	0.31101	N/A
168700	hsa-miR-5696	0.803404	0.398461	98	131	97	109.5	92.5	91	34.5	20.5	30.5	29	24.5	17	28.5	23.5	0.183511	0.113889	0.155612	0.16156	0.124051	0.078341	0.151004	0.121317	0.23204	0.343535
168829	hsa-miR-4794	0.0942618	N/A	70	106	64.5	81.5	64	60.5	8.5	2.5	-2	0.5	-3	-6	3	-2.83333	0.0452128	0.0138889	N/A	0.00278552	N/A	N/A	0.0295508	0.00278552	0.749533	N/A
168602	hsa-miR-4666a-3p	N/A	N/A	63	98	64.5	76.5	62.5	56.5	-0.5	-10.5	-5.5	-3.5	-12	-11	-5.5	-8.83333	N/A	N/A	N/A	N/A	N/A	N/A	N/A	N/A	N/A	N/A
168894	hsa-miR-3978	N/A	N/A	67	102	66.5	80	59	56.5	8	-14	-3	-0.5	-8.5	-15	-3	-8	0.0425532	N/A	N/A	N/A	N/A	N/A	0.0425532	N/A	N/A	N/A
168918	hsa-miR-4491	0.478274	0.373907	112.5	116	104	103.5	78.5	77.5	47.5	5	24	20	11.5	5	25.5	12.1667	0.25266	0.0277778	0.122449	0.111421	0.0582278	0.0230415	0.134295	0.06423	0.840743	0.692733
168704	hsa-miR-506-5p	0.517926	0.66158	73.5	152	73	95.5	71	67	8	40	1	14	3	-1.5	16.3333	5.16667	0.0425532	0.222222	0.00510204	0.0779944	0.0151899	N/A	0.0899592	0.0465922	1.29018	0.953155
168708	hsa-miR-296-5p	0.375147	0.103119	105	174.5	108	108.5	85	76	34	69.5	37	27.5	18	8.5	46.8333	18	0.180851	0.386111	0.188776	0.153203	0.0911392	0.0391705	0.251913	0.0945044	0.461616	0.604108
168621	hsa-miR-4796-5p	1.77324	N/A	75	107	71	92.5	61.5	60	6	5	-7.5	9.5	-5.5	-9.5	1.16667	-1.83333	0.0319149	0.0277778	N/A	0.0529248	N/A	N/A	0.0298463	0.0529248	0.0980148	N/A
168670	hsa-miR-4694-5p	0.459407	0.518241	84	160	81.5	95.5	67	77	14	52.5	8.5	13	-2	11.5	25	7.5	0.0744681	0.291667	0.0433673	0.0724234	N/A	0.0529954	0.136501	0.0627094	0.991016	0.219069
168767	hsa-miR-4681	N/A	N/A	72.5	103	67.5	82	66.5	64	3	-5.5	-7	-2	-3.5	-5	-3.16667	-3.5	0.0159574	N/A	N/A	N/A	N/A	N/A	0.0159574	N/A	N/A	N/A
168594	hsa-miR-3150b-5p	0.132715	0.100568	81	145	93.5	88.5	68.5	71	14	38.5	0	6.5	1	3.5	17.5	3.66667	0.0744681	0.213889	N/A	0.0362117	0.00506329	0.016129	0.144178	0.0191347	0.683773	0.825215
168844	hsa-miR-4532	0.862813	0.663143	14647.5	4735.5	12273	10348.5	8331.5	9622.5	14585	4624	12206	10254	8261.5	9521.5	10471.7	9345.67	77.5798	25.6889	62.2755	57.1253	41.8304	43.8779	55.1814	47.6112	0.483187	0.174389
168975	hsa-miR-4528	N/A	N/A	68	97	60.5	65	59	72.5	7	-10	-4	-6	-8	-20	-2.33333	-11.3333	0.037234	N/A	N/A	N/A	N/A	N/A	0.037234	N/A	N/A	N/A
168570	hsa-miR-2682-3p	0.339047	0.26475	101.5	225	90	93	92	102	38	117	23.5	22	24.5	18	59.5	21.5	0.202128	0.65	0.119898	0.122563	0.124051	0.0829493	0.324009	0.109854	0.880517	0.21221
168649	hsa-miR-3129-3p	N/A	N/A	69	103	68	65	60.5	60.5	6	-4.5	2	-7.5	-5	-17	1.16667	-9.83333	0.0319149	N/A	0.0102041	N/A	N/A	N/A	0.0210595	N/A	0.728976	N/A
168786	hsa-miR-3618	0.0280147	N/A	73.5	139	76.5	73.5	68.5	76.5	10	30.5	9.5	-3	0.5	-6.5	16.6667	-3	0.0531915	0.169444	0.0484694	N/A	0.00253165	N/A	0.0903684	0.00253165	0.758257	N/A
169074	hsa-miR-3972	0.0859299	N/A	82	149	77	76	67	79.5	18.5	44.5	8.5	2	-1	-1.5	23.8333	-0.166667	0.0984043	0.247222	0.0433673	0.0111421	N/A	N/A	0.129665	0.0111421	0.81334	N/A
169106	hsa-miR-4783-3p	1.13842	0.46006	184.5	247.5	162.5	226.5	184.5	236.5	119	138	95.5	143	114	168	117.5	141.667	0.632979	0.766667	0.487245	0.796657	0.577215	0.774194	0.628963	0.716022	0.222198	0.168618
169071	hsa-miR-4639-5p	1.60192	N/A	73	118	72.5	98	69.5	61.5	8.5	14	3.5	13.5	-2	-9.5	8.66667	0.666667	0.0452128	0.0777778	0.0178571	0.0752089	N/A	N/A	0.0469492	0.0752089	0.638946	N/A
168984	hsa-miR-4637	N/A	N/A	61	90	60.5	78	58.5	59	-0.5	-16	-6	-2.5	-10.5	-8.5	-7.5	-7.16667	N/A	N/A	N/A	N/A	N/A	N/A	N/A	N/A	N/A	N/A
169265	hsa-miR-4733-3p	0.55478	0.269702	80.5	130.5	77	93	82.5	74.5	11.5	25	11.5	12.5	10.5	4.5	16	9.16667	0.0611702	0.138889	0.0586735	0.0696379	0.0531646	0.0207373	0.0862442	0.0478466	0.528833	0.52
169099	hsa-miR-4790-3p	2.70857	N/A	72	100.5	74	100	71	65.5	7.5	-7.5	7.5	19	-2	-1.5	2.5	5.16667	0.0398936	N/A	0.0382653	0.10585	N/A	N/A	0.0390795	0.10585	0.0294628	N/A
169201	hsa-miR-5047	N/A	N/A	70.5	115	65.5	80	66.5	63	6.5	10	-1	0	-4.5	-7	5.16667	-3.83333	0.0345745	0.0555556	N/A	N/A	N/A	N/A	0.045065	N/A	0.32921	N/A
169132	hsa-miR-382-3p	1.08854	0.763398	878.5	1630.5	794.5	1189	1308	1273	820	1524	720.5	1103	1237	1206	1021.5	1182	4.3617	8.46667	3.67602	6.14485	6.26329	5.5576	5.50146	5.98858	0.470916	0.0631045
169122	hsa-miR-5687	N/A	N/A	68	106	70.5	79	65	58	7	0.5	-1.5	-2	-4	-8.5	2	-4.83333	0.037234	0.00277778	N/A	N/A	N/A	N/A	0.0200059	N/A	1.21785	N/A
169227	hsa-miR-3064-5p	0.519199	0.309099	84.5	152.5	90	106	78	82	24	44	11.5	22	9.5	11.5	26.5	14.3333	0.12766	0.244444	0.0586735	0.122563	0.0481013	0.0529954	0.143592	0.0745531	0.653967	0.558655
169289	hsa-miR-4692	1.51092	0.552252	82.5	118	81.5	99.5	77.5	66.5	16	8.5	2	18.5	8	-3	8.83333	7.83333	0.0851064	0.0472222	0.0102041	0.103064	0.0405063	N/A	0.0475109	0.0717852	0.788282	0.616213
169308	hsa-miR-4503	0.266619	0.394898	82.5	192	74	104	73	68	17.5	88	2.5	24	4	1	36	9.66667	0.0930851	0.488889	0.0127551	0.133705	0.0202532	0.00460829	0.198243	0.0528554	1.28575	1.33294
169282	hsa-miR-4290	0.70335	0.0603901	662	926.5	764	550	615	614	595.5	821.5	687	470.5	549	543	701.333	520.833	3.16755	4.56389	3.5051	2.62117	2.77975	2.5023	3.74551	2.63441	0.194513	0.052837
169172	hsa-miR-4445-3p	0.723713	0.669503	90	153.5	78	116	81.5	70	23.5	43	3.5	30.5	16	5.5	23.3333	17.3333	0.125	0.238889	0.0178571	0.169916	0.0810127	0.0253456	0.127249	0.0920916	0.868638	0.791814
169199	hsa-miR-4518	0.813862	0.331847	371	311	396.5	281.5	254	400	293.5	201.5	330	196.5	184.5	330.5	275	237.167	1.56117	1.11944	1.68367	1.09471	0.934177	1.52304	1.45476	1.18398	0.204008	0.25711
169034	hsa-miR-642b-5p	0.733649	0.482744	980.5	2199.5	937.5	1120	1033	1059	898	2090	852	1039	961.5	988.5	1280	996.333	4.7766	11.6111	4.34694	5.7883	4.86835	4.5553	6.91155	5.07065	0.589681	0.126396
169173	hsa-miR-5590-3p	2.09471	N/A	67	107.5	84.5	88	62	62.5	3.5	-1	-25	7	-6	-3.5	-7.5	-0.833333	0.018617	N/A	N/A	0.0389972	N/A	N/A	0.018617	0.0389972	N/A	N/A
169231	hsa-miR-4766-3p	N/A	N/A	69.5	97.5	67.5	74.5	60	70	3	-5	-0.5	-1	-8.5	-30	-0.833333	-13.1667	0.0159574	N/A	N/A	N/A	N/A	N/A	0.0159574	N/A	N/A	N/A
169315	hsa-miR-4676-3p	N/A	N/A	70.5	107	67	70.5	65	66	8	-0.5	1	-1	-1	-21	2.83333	-7.66667	0.0425532	N/A	0.00510204	N/A	N/A	N/A	0.0238276	N/A	1.1114	N/A
169005	hsa-miR-520b/hsa-miR-520c-3p	0.326086	0.0170568	82	126	82.5	85	80	81	21	16.5	18	6	11.5	1	18.5	6.16667	0.111702	0.0916667	0.0918367	0.0334262	0.0582278	0.00460829	0.0984018	0.0320874	0.117058	0.836303
168580		0.615734	0.0546986	104.5	148	102	93.5	100.5	106	39.5	39.5	36	14.5	34.5	26.5	38.3333	25.1667	0.210106	0.219444	0.183673	0.0807799	0.174684	0.12212	0.204408	0.125861	0.0907684	0.373932
169246		0.506218	0.394684	79	146	76	103	75	85	18	44	8.5	21.5	6.5	9	23.5	12.3333	0.0957447	0.244444	0.0433673	0.119777	0.0329114	0.0414747	0.127852	0.0647211	0.815886	0.739664
169291		1.519	0.315196	251.5	121.5	235	275.5	276.5	248.5	182.5	16.5	167.5	191	207.5	173	122.167	190.5	0.970745	0.0916667	0.854592	1.06407	1.05063	0.797235	0.639001	0.970645	0.747338	0.154874
168888		0.856926	N/A	71.5	99	64	82.5	62.5	57	5.5	-3	-2	4.5	-8	-15.5	0.166667	-6.33333	0.0292553	N/A	N/A	0.0250696	N/A	N/A	0.0292553	0.0250696	N/A	N/A
169416		0.219075	0.398001	105.5	974.5	159.5	136.5	124.5	200.5	35	873	91	56.5	52.5	135.5	333	81.5	0.18617	4.85	0.464286	0.314763	0.265823	0.624424	1.83349	0.40167	1.42683	0.48412
168913		1.06823	0.581336	260	237	264	276.5	255	272.5	190	132	197.5	193.5	181.5	204.5	173.167	193.167	1.01064	0.733333	1.00765	1.07799	0.918987	0.942396	0.917208	0.979793	0.173622	0.0876174
169060		0.662166	0.385785	417	1156	607	517.5	537.5	527	349.5	1046.5	535	435.5	468.5	453.5	643.667	452.5	1.85904	5.81389	2.72959	2.42618	2.37215	2.08986	3.46751	2.29607	0.599313	0.0786606
169051		1.10693	0.746615	143.5	201.5	119.5	185.5	140.5	147.5	73	94.5	46.5	106.5	67	74	71.3333	82.5	0.388298	0.525	0.237245	0.593315	0.339241	0.341014	0.383514	0.424523	0.375311	0.344341
168604		0.0654596	N/A	72	100.5	72.5	80	62.5	65.5	8	-4.5	-2	0.5	-8.5	-7	0.5	-5	0.0425532	N/A	N/A	0.00278552	N/A	N/A	0.0425532	0.00278552	N/A	N/A
28161		0.365202	N/A	79	124.5	75.5	79	71	63	16.5	2.5	2.5	2.5	-3.5	-1.5	7.16667	-0.833333	0.087766	0.0138889	0.0127551	0.0139276	N/A	N/A	0.0381366	0.0139276	1.1271	N/A
13170	hsa-miR-380-5p	N/A	N/A	68.5	114	68.5	78	64.5	56.5	4.5	-10.5	2.5	-1.5	-6	-8	-1.16667	-5.16667	0.0239362	N/A	0.0127551	N/A	N/A	N/A	0.0183456	N/A	0.430959	N/A
46324	hsa-miR-320b	1.29597	0.176191	1276.5	756.5	1155	1371.5	1422	1384	1213.5	631.5	1089	1293	1350	1318	978	1320.33	6.45479	3.50833	5.55612	7.20334	6.83544	6.07373	5.17308	6.70417	0.291917	0.0859364
17433		0.322952	0.0427073	94	171.5	90.5	90.5	79	78	31	44.5	22	12	7.5	14	32.5	11.1667	0.164894	0.247222	0.112245	0.0668524	0.0379747	0.0645161	0.174787	0.0564477	0.389219	0.284169
11202		0.4983	0.153108	88.5	160.5	86	89	86	72	25.5	37.5	16	16	17	8	26.3333	13.6667	0.135638	0.208333	0.0816327	0.0891365	0.0860759	0.0368664	0.141868	0.0706929	0.44816	0.414958
42939		1.37298	0.178183	1735.5	1191	2432	2649	2184	2660	1674	1074.5	2363.5	2570	2114	2594.5	1704	2426.17	8.90426	5.96944	12.0587	14.3175	10.7038	11.9562	8.97746	12.3259	0.339213	0.148875
17676	hsa-miR-152-3p	0.89792	0.826559	866.5	263	1371.5	658	770.5	882	804.5	144	1304	579	699.5	817.5	750.833	698.667	4.27926	0.8	6.65306	3.22563	3.54177	3.76728	3.91077	3.51156	0.752761	0.0774835
17593	hsa-miR-650	0.611517	0.307069	87	173.5	92	95	89	93.5	24	50.5	20.5	19	16	27.5	31.6667	20.8333	0.12766	0.280556	0.104592	0.10585	0.0810127	0.126728	0.170936	0.10453	0.55946	0.218944
46483	hsa-miR-27a-3p	1.64016	0.324251	3789	274	7217	5029	7597.5	6140	3726	151	7148.5	4952	7528.5	6075	3675.17	6185.17	19.8191	0.838889	36.4719	27.5877	38.119	27.9954	19.0433	31.234	0.936243	0.19101
46438	hsa-let-7g-5p	0.968681	0.906726	2016.5	1440.5	3111.5	1743	2755	2101	1954.5	1320	3043	1660.5	2683.5	2034.5	2105.83	2126.17	10.3963	7.33333	15.5255	9.2507	13.5873	9.37558	11.085	10.7379	0.373412	0.229888
42703	hsa-miR-490-3p	1.29846	0.35938	101	186	118	153	115.5	161	38.5	64.5	51	72	45	95.5	51.3333	70.8333	0.204787	0.358333	0.260204	0.401114	0.227848	0.440092	0.274442	0.356351	0.283328	0.317049
28054		0.382829	0.00733209	85.5	147.5	85	84.5	78.5	74.5	22	26.5	19	7.5	9.5	10.5	22.5	9.16667	0.117021	0.147222	0.0969388	0.0417827	0.0481013	0.0483871	0.120394	0.0460904	0.210233	0.0809987
14302		1.35845	0.551425	210	124	337.5	245	264.5	284.5	146	1	269	167	195	219	138.667	193.667	0.776596	0.00555556	1.37245	0.930362	0.987342	1.00922	0.7182	0.97564	0.954212	0.0417252
17625	hsa-miR-627-5p	0.611496	0.206529	88	134	95.5	92	84.5	75	26.5	10	23	13	14.5	10	19.8333	12.5	0.140957	0.0555556	0.117347	0.0724234	0.0734177	0.0460829	0.10462	0.0639747	0.42153	0.242325
27568	hsa-miR-744-5p	1.04105	0.902466	365.5	210	428.5	327.5	349.5	354.5	304.5	89.5	357	241.5	281	289	250.333	270.5	1.61968	0.497222	1.82143	1.3454	1.42278	1.3318	1.31278	1.36666	0.543473	0.0359106
42478	hsa-miR-593-5p	0.777605	0.245914	77	117.5	82.5	89.5	82	76.5	13	-5.5	17	13.5	11.5	10.5	8.16667	11.8333	0.0691489	N/A	0.0867347	0.0752089	0.0582278	0.0483871	0.0779418	0.060608	0.159542	0.223871
42457	hsa-miR-323a-5p	0.568537	0.147951	81.5	137	78	92.5	79	69	19	18.5	12.5	14.5	10	4.5	16.6667	9.66667	0.101064	0.102778	0.0637755	0.0807799	0.0506329	0.0207373	0.0892057	0.0507167	0.247068	0.591943
17589	ebv-miR-BART3-3p	1.92246	0.0228924	141	154.5	130.5	197.5	171.5	188	78	35.5	62	124	105.5	121.5	58.5	117	0.414894	0.197222	0.316327	0.690808	0.534177	0.559908	0.309481	0.594964	0.352193	0.141175
42832	hsa-miR-638	1.48369	0.0808776	265.5	222.5	231	310	275	354	203	103	161.5	233.5	206.5	288	155.833	242.667	1.07979	0.572222	0.82398	1.30084	1.04557	1.32719	0.82533	1.22453	0.307496	0.127024
42712		0.405632	0.0507403	85	148	83.5	90.5	76	67.5	21.5	18.5	13	12	4.5	5.5	17.6667	7.33333	0.114362	0.102778	0.0663265	0.0668524	0.0227848	0.0253456	0.0944887	0.0383276	0.265296	0.645392
42748		0.297159	0.0787862	99.5	169.5	88	89.5	82	72.5	33.5	45.5	15.5	11.5	10	8	31.5	9.83333	0.178191	0.252778	0.0790816	0.0640669	0.0506329	0.0368664	0.170017	0.050522	0.512514	0.269201
42807		1.17052	0.235116	177	212.5	200	213.5	190	216	115.5	85.5	123.5	134	114	149.5	108.167	132.5	0.614362	0.475	0.630102	0.746518	0.577215	0.68894	0.573155	0.670891	0.148944	0.128311
46462	hsa-miR-1224-5p	0.355484	0.0390306	110	186.5	99	99.5	88.5	82	47.5	60.5	30.5	16.5	20	15.5	46.1667	17.3333	0.25266	0.336111	0.155612	0.091922	0.101266	0.0714286	0.248128	0.0882055	0.364066	0.173026
46822	hsa-miR-1178-3p	0.358496	0.02732	95.5	170	96.5	90.5	85.5	75.5	32	43.5	26.5	14.5	15.5	8	34	12.6667	0.170213	0.241667	0.135204	0.0807799	0.078481	0.0368664	0.182361	0.0653758	0.297547	0.37807
28759	hsa-miR-758-3p	0.557157	0.115747	98	183.5	100.5	102	92.5	86	35	54	29.5	23.5	26	20	39.5	23.1667	0.18617	0.3	0.15051	0.130919	0.131646	0.0921659	0.212227	0.118244	0.367894	0.19102
17527		0.389943	0.0756244	81.5	142.5	76	82.5	77.5	66	18.5	17	10.5	6.5	5.5	0	15.3333	4	0.0984043	0.0944444	0.0535714	0.0362117	0.0278481	N/A	0.08214	0.0320299	0.30217	0.184639
42496	hsa-miR-181c-5p	0.895151	0.594186	104.5	145.5	105.5	103.5	102.5	98.5	42	21	35	26.5	32.5	33	32.6667	30.6667	0.223404	0.116667	0.178571	0.147632	0.164557	0.152074	0.172881	0.154754	0.310016	0.0567026
10306	hsa-miR-146b-5p	1.24816	0.258595	134.5	239.5	146	183.5	186	195	72.5	118	76	104.5	118.5	130.5	88.8333	117.833	0.385638	0.655556	0.387755	0.582173	0.6	0.601382	0.476316	0.594518	0.325895	0.0180213
46982		0.332113	0.0577152	86.5	143.5	83.5	84	71.5	73	24	21	12.5	12	2	5.5	19.1667	6.5	0.12766	0.116667	0.0637755	0.0668524	0.0101266	0.0253456	0.102701	0.0341082	0.332571	0.860806
46538		0.146892	0.369753	760.5	15386.5	1262.5	888.5	1005.5	1082.5	697.5	15260.5	1193	806.5	934	1013.5	5717	918	3.71011	84.7806	6.08673	4.49304	4.72911	4.67051	31.5258	4.63089	1.46341	0.0265446
17882	hsa-miR-20b-3p	0.952365	0.681644	153	205	178	163.5	152	183.5	89	79	106	79	79	118	91.3333	92	0.473404	0.438889	0.540816	0.440111	0.4	0.543779	0.48437	0.461297	0.107028	0.160837
42765		1.13671	0.448444	114	156	106.5	129.5	113.5	127.5	52.5	34	41.5	51	41	61	42.6667	51	0.279255	0.188889	0.211735	0.284123	0.207595	0.281106	0.226626	0.257608	0.207336	0.168235
46921		1.1872	0.641207	2453.5	1162	3064	3196	3118.5	1650.5	2391	1042	2994.5	3116.5	3050.5	1584.5	2142.5	2583.83	12.7181	5.78889	15.2781	17.3621	15.4456	7.30184	11.2617	13.3698	0.435936	0.399533
27551	hsa-miR-612	1.03873	0.832754	128.5	183	113.5	127	134.5	120.5	65.5	58	39	55.5	65	57.5	54.1667	59.3333	0.348404	0.322222	0.19898	0.309192	0.329114	0.264977	0.289869	0.301094	0.275274	0.109023
42481		0.605153	0.268685	101	141.5	90.5	105	81.5	76.5	37	19	20	24.5	10	12.5	25.3333	15.6667	0.196809	0.105556	0.102041	0.13649	0.0506329	0.0576037	0.134802	0.0815756	0.398573	0.58455
42864		1.09766	0.579266	164	261.5	171.5	207.5	182.5	220.5	98.5	139.5	102	128.5	111.5	155.5	113.333	131.833	0.523936	0.775	0.520408	0.715877	0.564557	0.71659	0.606448	0.665675	0.240715	0.131553
42504	hsa-miR-593-3p	0.491055	0.0551282	110.5	187.5	106.5	104	94	95.5	48	67	38.5	26	24	30	51.1667	26.6667	0.255319	0.372222	0.196429	0.144847	0.121519	0.138249	0.274657	0.134872	0.325781	0.0891591
42897	ebv-miR-BART15	0.412888	0.111586	99.5	177	92.5	99.5	87	78	35.5	54	22.5	22.5	14	11.5	37.3333	16	0.18883	0.3	0.114796	0.125348	0.0708861	0.0529954	0.201209	0.0830766	0.463303	0.453622
42874	hsa-miR-16-2-3p	0.728196	0.0182845	117	161	118	115	109	103	54.5	44	48.5	37.5	37.5	37	49	37.3333	0.289894	0.244444	0.247449	0.208914	0.189873	0.170507	0.260596	0.189765	0.097535	0.101197
42742		1.07683	0.740496	119.5	145	144.5	134	127	133.5	54.5	30.5	74	54	58.5	66	53	59.5	0.289894	0.169444	0.377551	0.300836	0.296203	0.304147	0.278963	0.300395	0.374541	0.013285
17490	hsa-miR-571	0.336651	0.0707821	104	194.5	97.5	95	87.5	81.5	41	70.5	31.5	17.5	16.5	17	47.6667	17	0.218085	0.391667	0.160714	0.097493	0.0835443	0.078341	0.256822	0.0864595	0.468225	0.114542
46565	hsa-miR-1207-5p	0.403142	0.0596094	96	175	96	97.5	87	80	32.5	50.5	26.5	18	12.5	16	36.5	15.5	0.172872	0.280556	0.135204	0.100279	0.0632911	0.0737327	0.196211	0.0791008	0.384454	0.241073
15619	hsa-miR-649	0.238273	0.00245036	84.5	142	81.5	83	79.5	70	21.5	19.5	16.5	3	7.5	4	19.1667	4.83333	0.114362	0.108333	0.0841837	0.0167131	0.0379747	0.0184332	0.102293	0.0243737	0.156121	0.484548
10943	hsa-miR-136-5p	1.56531	0.333814	432	175.5	549	356.5	621	728	371	50.5	481.5	275.5	552	660.5	301	496	1.9734	0.280556	2.45663	1.53482	2.79494	3.04378	1.5702	2.45784	0.727742	0.329146
42706		0.495193	0.472505	300	1538	322.5	453.5	345.5	433.5	236	1412	249	369.5	275	365.5	632.333	336.667	1.25532	7.84444	1.27041	2.0585	1.39241	1.68433	3.45672	1.71174	1.09927	0.195059
10977	hsa-miR-183-5p	0.584892	0.467311	126.5	387.5	152.5	149	141	189.5	61.5	265.5	77	70	65.5	122	134.667	85.8333	0.327128	1.475	0.392857	0.389972	0.331646	0.562212	0.731662	0.427943	0.880992	0.280134
42530	hsa-let-7a-2-3p	1.40879	0.112339	155	259	162.5	245.5	207	235.5	91.5	135.5	92	167	137	170	106.333	158	0.486702	0.752778	0.469388	0.930362	0.693671	0.78341	0.569623	0.802481	0.278874	0.148904
42569		0.465603	0.0301326	99.5	159.5	93.5	95	91	78	36.5	39	25.5	14.5	21.5	13.5	33.6667	16.5	0.194149	0.216667	0.130102	0.0807799	0.108861	0.062212	0.180306	0.0839509	0.249087	0.279753
46639		0.527362	0.185052	109	241.5	135	115	104	117.5	48	117.5	65.5	40.5	37.5	52	77	43.3333	0.255319	0.652778	0.334184	0.225627	0.189873	0.239631	0.414094	0.218377	0.50818	0.117498
10990	hsa-miR-196a-5p	0.353447	0.0905951	99	183	96	94	82.5	78	36.5	57	23.5	21	10	12	39	14.3333	0.194149	0.316667	0.119898	0.116992	0.0506329	0.0552995	0.210238	0.074308	0.472637	0.498448
14285	hsa-miR-487b-3p	1.30851	0.0916879	4753.5	2941.5	4282	5089	5645.5	5512.5	4689	2816.5	4213	5008.5	5577	5446	3906.17	5343.83	24.9415	15.6472	21.4949	27.9025	28.238	25.0968	20.6945	27.0791	0.227043	0.0636988
27546	hsa-miR-380-3p	0.474932	0.0430515	86.5	146.5	87	89.5	79	70.5	22	24	16	14	8	8.5	20.6667	10.1667	0.117021	0.133333	0.0816327	0.0779944	0.0405063	0.0391705	0.110662	0.0525571	0.238838	0.419344
31026	hsa-miR-101-3p	1.36785	0.243495	656.5	556	932.5	680.5	966	1308.5	595.5	434.5	860	603.5	896.5	1244.5	630	914.833	3.16755	2.41389	4.38776	3.36212	4.53924	5.73502	3.32307	4.54546	0.299747	0.261022
11040	hsa-miR-29b-3p	1.50571	0.458427	1143.5	185	2313	1157.5	2401	1938	1081	66	2244.5	1079	2332.5	1873	1130.5	1761.5	5.75	0.366667	11.4515	6.01114	11.8101	8.63134	5.85607	8.81754	0.946573	0.329341
13130	hsa-miR-517-5p	0.412215	0.292841	78.5	138	71	79.5	66.5	71	15	14.5	3.5	3	-1.5	7	11	2.83333	0.0797872	0.0805556	0.0178571	0.0167131	N/A	0.0322581	0.0594	0.0244856	0.605711	0.448915
46461		0.507844	0.0223463	99.5	166	99	99.5	91	78.5	35	40.5	30.5	21	21	14	35.3333	18.6667	0.18617	0.225	0.155612	0.116992	0.106329	0.0645161	0.188927	0.0959456	0.18407	0.28908
11138	hsa-miR-506-3p	0.616656	0.119207	98	143.5	90.5	93	91	78.5	32	19	21.5	12	21	14	24.1667	15.6667	0.170213	0.105556	0.109694	0.0668524	0.106329	0.0645161	0.128487	0.0792325	0.281696	0.296537
46293		0.299001	0.0174103	83	138	81.5	86	76	67.5	18.5	15.5	12.5	7.5	5.5	1	15.5	4.66667	0.0984043	0.0861111	0.0637755	0.0417827	0.0278481	0.00460829	0.0827636	0.0247464	0.212115	0.758912
28547		0.327949	0.056479	102.5	181.5	100	102.5	80.5	76.5	43	64.5	31	22.5	13.5	11	46.1667	15.6667	0.228723	0.358333	0.158163	0.125348	0.0683544	0.0506912	0.248407	0.0814646	0.40871	0.478944
146101		0.964423	0.839968	99	157	98.5	106	107	104	37	36.5	28.5	23.5	42	39.5	34	35	0.196809	0.202778	0.145408	0.130919	0.212658	0.182028	0.181665	0.175202	0.17362	0.235699
145998		1.48759	0.123949	331.5	246.5	362.5	429.5	465	381	268.5	130.5	295	356	395.5	316	231.333	355.833	1.42819	0.725	1.5051	1.98329	2.00253	1.45622	1.21943	1.81401	0.352552	0.170895
146118		0.576266	0.153661	121.5	219.5	123	126.5	122	96	59	97.5	53	45.5	48.5	32.5	69.8333	42.1667	0.31383	0.541667	0.270408	0.253482	0.24557	0.14977	0.375302	0.216274	0.388229	0.26693
146045	hsv2-miR-H4-5p	0.300025	0.246319	85.5	144	72.5	79.5	78	68.5	23.5	17.5	4.5	0	6.5	3.5	15.1667	3.33333	0.125	0.0972222	0.0229592	N/A	0.0329114	0.016129	0.0817271	0.0245202	0.645509	0.483965
13146		0.394232	0.00922605	88	143.5	90	88	78.5	74	26	16.5	20.5	9	7.5	9.5	21	8.66667	0.138298	0.0916667	0.104592	0.0501393	0.0379747	0.0437788	0.111519	0.0439643	0.215883	0.138395
145987	hsa-miR-2054	0.153527	0.0691342	88.5	146	84.5	80.5	74	66.5	24.5	19	10.5	3.5	2	-0.5	18	1.66667	0.130319	0.105556	0.0535714	0.0194986	0.0101266	N/A	0.096482	0.0148126	0.405984	0.447391
146111	hsa-miR-767-5p	1.06172	0.749768	2257.5	2191	1627.5	2564.5	1982	2120	2194.5	2065	1557	2487	1910.5	2057	1938.83	2151.5	11.6729	11.4722	7.94388	13.8552	9.67342	9.47926	10.363	11.0026	0.202395	0.224699
145933	hsa-miR-652-5p	0.841693	0.326577	147	178	144.5	140	134.5	122	83	51	70.5	58	65.5	56	68.1667	59.8333	0.441489	0.283333	0.359694	0.32312	0.331646	0.258065	0.361506	0.304277	0.218789	0.132272
146058	hsv1-miR-H3-3p	0.394426	0.0609836	109	188.5	101	95.5	92	80.5	42.5	61.5	30.5	21	20.5	14	44.8333	18.5	0.226064	0.341667	0.155612	0.116992	0.103797	0.0645161	0.241114	0.0951017	0.389591	0.28703
145666	SNORD110	0.490424	0.266334	158	508	274.5	161.5	196	224	94.5	388.5	210.5	83.5	127	157	231.167	122.5	0.50266	2.15833	1.07398	0.465181	0.643038	0.723502	1.24499	0.610574	0.675491	0.216493
146206		0.913669	0.792441	145	289	151.5	153	199.5	172.5	81.5	165.5	78.5	80.5	130	107.5	108.5	106	0.433511	0.919444	0.40051	0.448468	0.658228	0.495392	0.584488	0.534029	0.4971	0.206147
146026		0.336934	0.073719	91.5	162	85.5	85.5	78	72.5	26.5	39.5	16.5	13	8	8	27.5	9.66667	0.140957	0.219444	0.0841837	0.0724234	0.0405063	0.0368664	0.148195	0.049932	0.458316	0.391791
146098	hsv1-miR-H5-3p	0.539601	0.253146	77.5	154.5	86.5	85.5	80	83.5	14.5	37	17.5	13	8.5	18.5	23	13.3333	0.0771277	0.205556	0.0892857	0.0724234	0.043038	0.0852535	0.12399	0.0669049	0.571816	0.323474
146004		0.567399	0.239381	131.5	244	112	119	116	110	67.5	117	42.5	44.5	47	45.5	75.6667	45.6667	0.359043	0.65	0.216837	0.247911	0.237975	0.209677	0.408626	0.231854	0.540341	0.085562
146161	hsa-miR-2115-3p	1.03332	0.893705	137.5	237	171	159.5	155.5	224.5	74	121	101	84	86	158.5	98.6667	109.5	0.393617	0.672222	0.515306	0.467967	0.435443	0.730415	0.527048	0.544608	0.26501	0.296971
146168	hsa-miR-1912	0.326874	0.0849623	92.5	154	83.5	87.5	82.5	69.5	26.5	39	14.5	9	12.5	6	26.6667	9.16667	0.140957	0.216667	0.0739796	0.0501393	0.0632911	0.0276498	0.143868	0.0470267	0.496206	0.383259
146133		0.65372	0.0611322	90	136.5	95	96	82.5	86	28	17.5	27	14.5	14.5	21	24.1667	16.6667	0.148936	0.0972222	0.137755	0.0807799	0.0734177	0.0967742	0.127971	0.0836573	0.212625	0.142739
146090	hsv1-miR-H7-3p	0.920576	0.745221	299.5	255	378.5	281	329	257.5	237	134.5	309	198	260	191	226.833	216.333	1.26064	0.747222	1.57653	1.10306	1.31646	0.880184	1.1948	1.0999	0.350316	0.198339
29837	spike_control_v2_46	0.830481	0.373913	324.5	263.5	311.5	267.5	265.5	239	259.5	141.5	241	186	194	174	214	184.667	1.38032	0.786111	1.22959	1.03621	0.982278	0.801843	1.13201	0.940111	0.272869	0.130562
145870		0.209907	N/A	76.5	124.5	71.5	80	70.5	58.5	13	4	5.5	1.5	-0.5	-6	7.5	-1.66667	0.0691489	0.0222222	0.0280612	0.00835655	N/A	N/A	0.0398108	0.00835655	0.642408	N/A
145736	hsa-miR-605-5p	1.26662	0.175718	167	177.5	165.5	188.5	175	188	104.5	57.5	95	111	107.5	121.5	85.6667	113.333	0.555851	0.319444	0.484694	0.618384	0.544304	0.559908	0.45333	0.574199	0.26754	0.0680135
145721	hsa-miR-875-5p	N/A	N/A	71.5	122.5	70.5	74	65.5	60	8.5	1	1	-4.5	-0.5	-6	3.5	-3.66667	0.0452128	0.00555556	0.00510204	N/A	N/A	N/A	0.0186235	N/A	1.23651	N/A
145693	hsa-miR-92a-3p	1.7972	0.0727754	219	162.5	248	284.5	307.5	330.5	154	42	179.5	199	238.5	265	125.167	234.167	0.819149	0.233333	0.915816	1.10864	1.20759	1.2212	0.6561	1.17914	0.562876	0.0521048
145962	hsa-miR-639	0.427288	0.0757298	114	204	111	104.5	93.5	95	53	82.5	40	27	24.5	28	58.5	26.5	0.281915	0.458333	0.204082	0.150418	0.124051	0.129032	0.314777	0.1345	0.413857	0.10415
145705	hsa-miR-431-5p	0.812712	0.148187	142.5	212	136.5	136	132	134.5	79.5	82.5	62.5	59	64	70	74.8333	64.3333	0.422872	0.458333	0.318878	0.328691	0.324051	0.322581	0.400028	0.325107	0.181188	0.0098097
145878		0.874855	0.67348	87.5	137	86	91.5	91.5	86.5	26.5	9.5	20.5	12.5	20.5	19	18.8333	17.3333	0.140957	0.0527778	0.104592	0.0696379	0.103797	0.0875576	0.0994424	0.0869977	0.445633	0.196404
145727	hsa-miR-501-3p	0.389138	0.00218982	89	155	98	87.5	85	81.5	25.5	31.5	28.5	8.5	12.5	14.5	28.5	11.8333	0.135638	0.175	0.145408	0.0473538	0.0632911	0.0668203	0.152015	0.0591551	0.134827	0.175326
145637	hsa-miR-187-3p	0.299598	0.0278808	86	153.5	84	84.5	79	73	23.5	27.5	14	7	7.5	6	21.6667	6.83333	0.125	0.152778	0.0714286	0.0389972	0.0379747	0.0276498	0.116402	0.0348739	0.355239	0.179995
145748	hsa-miR-518f-3p	N/A	N/A	66.5	114	65	69.5	63	60	4	-11	-7.5	-4.5	-6	-7	-4.83333	-5.83333	0.0212766	N/A	N/A	N/A	N/A	N/A	0.0212766	N/A	N/A	N/A
145917		1.058	0.886536	750.5	455	1407	647.5	1001.5	1180	685.5	335.5	1335	568	933.5	1116.5	785.333	872.667	3.64628	1.86389	6.81122	3.16435	4.72658	5.14516	4.10713	4.34536	0.610075	0.240253
147193	hsa-miR-572	0.18088	0.0121811	77	133	76.5	76.5	76	62.5	12.5	9	10.5	0.5	3.5	-1.5	10.6667	0.833333	0.0664894	0.05	0.0535714	0.00278552	0.0177215	N/A	0.0566869	0.0102535	0.153032	1.03002
147608	hsa-miR-4307	0.30255	0.0302032	88.5	153	83	81.5	76	71.5	25.5	28	14	7.5	7.5	6.5	22.5	7.16667	0.135638	0.155556	0.0714286	0.0417827	0.0379747	0.0299539	0.120874	0.0365704	0.363716	0.16511
147872	hsv2-miR-H13	0.461109	0.158991	79.5	142.5	78	82	72.5	65.5	15.5	19	9	7	6.5	-1.5	14.5	4	0.0824468	0.105556	0.0459184	0.0389972	0.0329114	N/A	0.0779736	0.0359543	0.385633	0.119689
147938	hsa-miR-4287	1.17754	0.438776	116	162.5	97.5	138.5	124.5	112	53.5	42.5	31	54.5	56.5	45.5	42.3333	52.1667	0.284574	0.236111	0.158163	0.303621	0.286076	0.209677	0.226283	0.266458	0.281842	0.187459
147814	hsa-miR-3159	N/A	N/A	81.5	118.5	70	72	68	62	17.5	-1.5	2	-1.5	-1	-1	6	-1.16667	0.0930851	N/A	0.0102041	N/A	N/A	N/A	0.0516446	N/A	1.13479	N/A
147807		0.739184	0.124147	247	357	247.5	245	204	235	185	236	176	163	133	169	199	155	0.984043	1.31111	0.897959	0.908078	0.673418	0.778802	1.06437	0.786766	0.204792	0.149387
147924		0.830924	N/A	73	126.5	73.5	79.5	68	64.5	11.5	2.5	5	5	-2	-0.5	6.33333	0.833333	0.0611702	0.0138889	0.0255102	0.0278552	N/A	N/A	0.0335231	0.0278552	0.734959	N/A
147760	hsa-miR-4316	0.229226	0.033951	82.5	141.5	82.5	80.5	76.5	72.5	20.5	28	13	2	5.5	8	20.5	5.16667	0.109043	0.155556	0.0663265	0.0111421	0.0278481	0.0368664	0.110308	0.0252855	0.404575	0.516193
147544	hsa-miR-4314	0.5212	0.0258923	90	139.5	89	95	84	74	26.5	19.5	21	14.5	13	8.5	22.3333	12	0.140957	0.108333	0.107143	0.0807799	0.0658228	0.0391705	0.118811	0.0619244	0.161504	0.340364
147791		1.39363	0.263357	36805	13325.5	40540	44280	47265.5	38502	36742.5	13204.5	40468	44203	47194.5	38437	30138.3	43278.2	195.439	73.3583	206.469	246.256	238.959	177.129	158.422	220.782	0.466309	0.172025
147810		0.571176	0.144323	82.5	134	83.5	83	81.5	75	20.5	18.5	10.5	7	14.5	8.5	16.5	10	0.109043	0.102778	0.0535714	0.0389972	0.0734177	0.0391705	0.0884639	0.0505285	0.343413	0.39231
147737		0.663518	0.0230906	127.5	166.5	126	115	111.5	110.5	66	45.5	60	36	40.5	43	57.1667	39.8333	0.351064	0.252778	0.306122	0.200557	0.205063	0.198157	0.303321	0.201259	0.162214	0.0174223
147830	hsv1-miR-H18	1.23656	0.55063	448	236.5	583	446.5	594.5	474	383.5	113.5	517	363	527	406.5	338	432.167	2.03989	0.630556	2.63776	2.02228	2.66835	1.87327	1.7694	2.18797	0.582443	0.193167
147671	hsa-miR-4323	0.42391	0.180799	103.5	218.5	108	94.5	105.5	91	41.5	98	40.5	16.5	40	25.5	60	27.3333	0.220745	0.544444	0.206633	0.091922	0.202532	0.117512	0.323941	0.137322	0.589899	0.421672
147802		0.893601	0.78237	792	2169.5	969	1121	1239	1368	729	2046.5	904.5	1046.5	1168	1303	1226.67	1172.5	3.87766	11.3694	4.6148	5.83008	5.91392	6.00461	6.62063	5.91621	0.623667	0.0147535
147897	hsa-miR-3136-5p	0.324669	0.0723886	108.5	173.5	89.5	87.5	87.5	75	46	49.5	19	7.5	19	13.5	38.1667	13.3333	0.244681	0.275	0.0969388	0.0417827	0.0962025	0.062212	0.20554	0.0667324	0.463488	0.411945
147698	hsv2-miR-H22	0.388606	0.119232	95	184.5	88.5	87.5	86	77.5	32.5	55	20	13.5	16.5	14.5	35.8333	14.8333	0.172872	0.305556	0.102041	0.0752089	0.0835443	0.0668203	0.19349	0.0751912	0.533941	0.11121
148627	hsa-miR-615-5p	0.272867	0.0401702	86	164	91.5	82.5	84.5	73	22.5	39.5	21.5	4.5	11.5	8.5	27.8333	8.16667	0.119681	0.219444	0.109694	0.0250696	0.0582278	0.0391705	0.149606	0.0408227	0.405647	0.407635
148669	hsa-miR-185-3p	0.402591	0.0281244	100	148.5	88.5	88.5	85	76.5	35.5	23.5	21	9	14	11	26.6667	11.3333	0.18883	0.130556	0.107143	0.0501393	0.0708861	0.0506912	0.142176	0.0572389	0.295866	0.206539
148687	hsa-miR-1908-5p	1.58999	0.124177	658	309.5	623	820	704	893	593.5	187.5	552.5	743	633	827.5	444.5	734.5	3.15691	1.04167	2.81888	4.13928	3.20506	3.81336	2.33915	3.71923	0.485773	0.12749
10905	spike_control_v1_g	N/A	N/A	73.5	119.5	71.5	73	67.5	60	6	-5	2	-1.5	-3	-6	1	-3.5	0.0319149	N/A	0.0102041	N/A	N/A	N/A	0.0210595	N/A	0.728976	N/A
148234	hsa-miR-3667-5p	0.684254	0.290485	127	260.5	241.5	146	166	170.5	63.5	137.5	175.5	68	99.5	105	125.5	90.8333	0.337766	0.763889	0.895408	0.37883	0.503797	0.483871	0.665688	0.4555	0.437897	0.147401
148677	hsa-miR-637	0.204582	0.0402347	83.5	147.5	78.5	81	76	65.5	20.5	24.5	10	6	4	1.5	18.3333	3.83333	0.109043	0.136111	0.0510204	0.0334262	0.0202532	0.00691244	0.0987247	0.0201973	0.440351	0.656374
148654	hsa-miR-184	0.53131	0.0984245	90.5	163.5	85.5	90	89.5	80	26.5	39.5	21	14.5	19	15.5	29	16.3333	0.140957	0.219444	0.107143	0.0807799	0.0962025	0.0714286	0.155848	0.0828037	0.369671	0.151084
148079	hsa-miR-3673	0.483435	0.290583	72.5	128.5	80	77	73	63	12	4	7	2.5	5	-2	7.66667	1.83333	0.0638298	0.0222222	0.0357143	0.0139276	0.0253165	N/A	0.0405888	0.019622	0.522996	0.410414
148474	hsa-miR-3622a-5p	0.360217	0.0977594	80.5	158.5	83	86	76	71	18.5	35	15	9.5	9	7.5	22.8333	8.66667	0.0984043	0.194444	0.0765306	0.0529248	0.0455696	0.0345622	0.123126	0.0443522	0.509428	0.208369
148625	hsa-miR-941	0.317173	0.145532	101	195	93	87.5	85.5	82.5	36	75.5	22.5	13.5	16.5	15.5	44.6667	15.1667	0.191489	0.419444	0.114796	0.0752089	0.0835443	0.0714286	0.24191	0.0767273	0.655034	0.0807918
147640	kshv-miR-K12-10a-5p	1.29952	0.20081	152	177.5	128.5	175.5	153	162.5	89.5	53.5	61	99	82.5	95.5	68	92.3333	0.476064	0.297222	0.311224	0.551532	0.417722	0.440092	0.361504	0.469782	0.275126	0.152573
147599		0.186864	0.317002	75	116	72.5	78.5	68.5	66	12	-3.5	3	1	-5	2	3.83333	-0.666667	0.0638298	N/A	0.0153061	0.00557103	N/A	0.00921659	0.039568	0.00739381	0.867152	0.348643
147318	hsa-miR-3660	0.89178	0.654246	116	197.5	109	130	121.5	118.5	53	76.5	39	53	53	53	56.1667	53	0.281915	0.425	0.19898	0.295265	0.268354	0.24424	0.301965	0.269286	0.378641	0.0947886
147666	hsa-miR-4277	0.42379	0.0352868	85.5	135	82.5	81	75.5	73.5	19.5	13	11.5	4	7.5	8.5	14.6667	6.66667	0.103723	0.0722222	0.0586735	0.0222841	0.0379747	0.0391705	0.0782064	0.0331431	0.295544	0.284317
148186		0.194899	0.0263886	78.5	134	77.5	82	70	68.5	15	12.5	6.5	2	3	2	11.3333	2.33333	0.0797872	0.0694444	0.0331633	0.0111421	0.0151899	0.00921659	0.0607983	0.0118495	0.402725	0.257296
148021		0.918015	0.568163	87.5	146.5	88.5	100.5	92	88	22.5	27	19.5	19.5	25	22.5	23	22.3333	0.119681	0.15	0.0994898	0.108635	0.126582	0.103687	0.123057	0.112968	0.206602	0.106642
148131		0.597777	N/A	78.5	134.5	75.5	75.5	76.5	64	13.5	14.5	5	-3.5	7	0	11	1.16667	0.0718085	0.0805556	0.0255102	N/A	0.035443	N/A	0.0592914	0.035443	0.4989	N/A
148573		0.659007	N/A	71	120	64	72	71	63	6.5	-1.5	-3	-4.5	4.5	-1.5	0.666667	-0.5	0.0345745	N/A	N/A	N/A	0.0227848	N/A	0.0345745	0.0227848	N/A	N/A
148569		1.52542	0.500645	126	153.5	81	164	105	99	60.5	28	12.5	86.5	36	35	33.6667	52.5	0.321809	0.155556	0.0637755	0.481894	0.182278	0.16129	0.18038	0.275154	0.725111	0.651813
148137		0.326832	0.0619853	84.5	146.5	78.5	78	80.5	71	20	24	10	3.5	9	6.5	18	6.33333	0.106383	0.133333	0.0510204	0.0194986	0.0455696	0.0299539	0.0969122	0.031674	0.433029	0.41423
148359		0.680689	0.298378	118	189	99.5	120	107	90.5	54	64.5	28.5	42.5	35	27	49	34.8333	0.287234	0.358333	0.145408	0.236769	0.177215	0.124424	0.263659	0.179469	0.411148	0.313181
148315		0.6353	0.241201	99.5	171.5	91	100	94	81	34.5	45.5	20	27	21	18.5	33.3333	22.1667	0.183511	0.252778	0.102041	0.150418	0.106329	0.0852535	0.179443	0.114	0.420472	0.291689
148044		0.908522	0.804827	303.5	734.5	341	439	409	440	239	610	269.5	365.5	339	375.5	372.833	360	1.27128	3.38889	1.375	2.03621	1.71646	1.73041	2.01172	1.82769	0.593416	0.0988767
148431		0.142787	0.0751909	83.5	142.5	80	76	71	69.5	17.5	16	7.5	0	0.5	4	13.6667	1.5	0.0930851	0.0888889	0.0382653	N/A	0.00253165	0.0184332	0.0734131	0.0104824	0.415608	1.07266
148056		0.303819	0.103303	82.5	151.5	78.5	80.5	79.5	71.5	17.5	31	11	6	9.5	3.5	19.8333	6.33333	0.0930851	0.172222	0.0561224	0.0334262	0.0481013	0.016129	0.107143	0.0325522	0.553584	0.491643
148653		0.670077	0.186684	160.5	271	156	148.5	141	158	96	145.5	81.5	71.5	69	90	107.667	76.8333	0.510638	0.808333	0.415816	0.398329	0.349367	0.414747	0.578263	0.387481	0.354182	0.0877795
148367		0.507589	0.0516945	82	133.5	84.5	83	76.5	72.5	19	10.5	16.5	10	7.5	6.5	15.3333	8	0.101064	0.0583333	0.0841837	0.0557103	0.0379747	0.0299539	0.0811936	0.041213	0.265065	0.319803
148475		0.376225	0.162386	79.5	133	79.5	75.5	80.5	67	18	11	11	0.5	10	-0.5	13.3333	3.33333	0.0957447	0.0611111	0.0561224	0.00278552	0.0506329	N/A	0.0709927	0.0267092	0.303981	1.26672
148112		0.102553	N/A	77	136	74.5	69	72	61	13	11	3.5	-4.5	1	-5	9.16667	-2.83333	0.0691489	0.0611111	0.0178571	N/A	0.00506329	N/A	0.0493724	0.00506329	0.55876	N/A
148181	hsa-miR-203b-5p	1.08294	0.700309	89.5	144.5	89.5	100	103.5	90.5	30	25	20	24	36.5	25	25	28.5	0.159574	0.138889	0.102041	0.133705	0.18481	0.115207	0.133501	0.144574	0.218295	0.249367
148076		0.665737	0.248728	93	134.5	90.5	88.5	89.5	76.5	30	15.5	19.5	10.5	22	13	21.6667	15.1667	0.159574	0.0861111	0.0994898	0.0584958	0.111392	0.0599078	0.115058	0.0765987	0.340071	0.393486
148457		0.379255	0.0511841	96	159	92	94	84	76	32	44	21.5	13.5	13.5	12	32.5	13	0.170213	0.244444	0.109694	0.0752089	0.0683544	0.0552995	0.174784	0.0662876	0.386143	0.152582
148060		0.107093	0.0392025	76	138.5	76.5	78	70	64	12.5	20	7.5	2	1	1.5	13.3333	1.5	0.0664894	0.111111	0.0382653	0.0111421	0.00506329	0.00691244	0.0719553	0.00770593	0.510445	0.404377
148464		0.185451	0.0344696	81	138	74	78.5	72.5	68	18	18	7.5	2.5	4	2	14.5	2.83333	0.0957447	0.1	0.0382653	0.0139276	0.0202532	0.00921659	0.0780033	0.0144658	0.44203	0.38283
148141		0.457426	N/A	71	125.5	72.5	78.5	68	61.5	8.5	7	5	3	-1	-2.5	6.83333	-0.166667	0.0452128	0.0388889	0.0255102	0.0167131	N/A	N/A	0.0365373	0.0167131	0.275324	N/A
148194		0.725886	N/A	73	132	71	87	68.5	64	11	15.5	5.5	7.5	-2	-2	10.6667	1.16667	0.0585106	0.0861111	0.0280612	0.0417827	N/A	N/A	0.057561	0.0417827	0.504449	N/A
148646		0.394081	0.354978	130.5	499	161	141	137.5	160.5	68.5	380.5	90.5	67.5	69	94	179.833	76.8333	0.364362	2.11389	0.461735	0.376045	0.349367	0.43318	0.979995	0.386197	1.00326	0.110873
148386	hsa-miR-219b-5p	0.593873	0.553667	90.5	229	83	105	92	110.5	27.5	110	12.5	28.5	24	45	50	32.5	0.146277	0.611111	0.0637755	0.158774	0.121519	0.207373	0.273721	0.162556	1.07805	0.264844
148520		0.37522	0.237845	86.5	169	79.5	86.5	75.5	79.5	24	52	10	9.5	11	14.5	28.6667	11.6667	0.12766	0.288889	0.0510204	0.0529248	0.0556962	0.0668203	0.155856	0.0584804	0.77902	0.125756
148284	hsa-miR-208b-3p	0.76124	0.604257	87.5	124.5	77	86.5	79.5	76	25.5	9	7	9	12	12.5	13.8333	11.1667	0.135638	0.05	0.0357143	0.0501393	0.0607595	0.0576037	0.0737842	0.0561675	0.732425	0.0970994
148537		0.215538	0.176178	81	149	79.5	80.5	65.5	66.5	17.5	29	9	6.5	-0.5	1.5	18.5	2.5	0.0930851	0.161111	0.0459184	0.0362117	N/A	0.00691244	0.100038	0.0215621	0.578882	0.96084
11255		0.303558	0.0701886	93.5	168.5	85	85	80	71.5	32	41.5	15.5	8.5	13.5	6.5	29.6667	9.5	0.170213	0.230556	0.0790816	0.0473538	0.0683544	0.0299539	0.15995	0.048554	0.476753	0.39602
42962		0.545152	0.37122	141	349	133.5	138	123.5	159	77.5	222.5	62	65.5	53	95	120.667	71.1667	0.412234	1.23611	0.316327	0.364903	0.268354	0.437788	0.654891	0.357015	0.772085	0.238062
29650		0.958357	0.561262	127	179.5	124.5	133.5	130.5	123.5	61.5	56.5	54.5	57	58	58.5	57.5	57.8333	0.327128	0.313889	0.278061	0.317549	0.293671	0.269585	0.306359	0.293602	0.0828604	0.0816815
11164	hsa-miR-519e-3p	1.04288	0.90595	406.5	689.5	320	611.5	355.5	511.5	344	561	251.5	539	285.5	444.5	385.5	423	1.82979	3.11667	1.28316	3.00279	1.44557	2.04839	2.07654	2.16558	0.453316	0.362579
17886	hsa-miR-301b	0.275301	0.00312737	88.5	138.5	93	81	83	74.5	26	18.5	23.5	3	9.5	7.5	22.6667	6.66667	0.138298	0.102778	0.119898	0.0167131	0.0481013	0.0345622	0.120325	0.0331255	0.147633	0.475263
168684	hsa-miR-5010-5p	0.839723	0.506159	86.5	140	85.5	91.5	84.5	79	23	13.5	16	17.5	17	11	17.5	15.1667	0.12234	0.075	0.0816327	0.097493	0.0860759	0.0506912	0.092991	0.0780867	0.275648	0.312503
168679	hsa-miR-4763-3p	0.252164	0.0794454	84.5	142.5	78	75	73.5	70.5	20.5	20.5	10	-1.5	5	4.5	17	2.66667	0.109043	0.113889	0.0510204	N/A	0.0253165	0.0207373	0.0913173	0.0230269	0.383083	0.140615
168718	hsa-miR-4684-3p	N/A	N/A	69.5	117.5	66.5	71	62	62	6.5	-7	0.5	-1.5	-7	-3.5	0	-4	0.0345745	N/A	0.00255102	N/A	N/A	N/A	0.0185627	N/A	1.21986	N/A
168945	hsa-miR-326	0.121166	0.0296832	81	130	76.5	75	71	68	18.5	9.5	8.5	2	2	0.5	12.1667	1.5	0.0984043	0.0527778	0.0433673	0.0111421	0.0101266	0.00230415	0.0648498	0.0078576	0.453933	0.615475
168964	hsa-miR-4450	0.288106	0.247117	92	242.5	102	97.5	86	88.5	31	128.5	32.5	20	16.5	23	64	19.8333	0.164894	0.713889	0.165816	0.111421	0.0835443	0.105991	0.3482	0.100319	0.909526	0.147315
168932	hsa-miR-5094	0.17457	0.19586	80	129	67	74.5	72	62.5	17.5	7	-1.5	0.5	4	-2	7.66667	0.833333	0.0930851	0.0388889	N/A	0.00278552	0.0202532	N/A	0.065987	0.0115193	0.580759	1.07224
168934	hsa-miR-4999-5p	0.514456	0.427245	80	126	74.5	78.5	74.5	61	16	6	5	2.5	7	-2	9	2.5	0.0851064	0.0333333	0.0255102	0.0139276	0.035443	N/A	0.0479833	0.0246853	0.674956	0.616307
168600		0.848014	0.549648	1161.5	1916.5	1014.5	1127	1130.5	1423	1097.5	1798	943.5	1052	1063	1358.5	1279.67	1157.83	5.83777	9.98889	4.81378	5.86072	5.38228	6.26037	6.88014	5.83446	0.398321	0.0753513
168726		0.880596	0.445475	110	194.5	133	121.5	132	127.5	47.5	72.5	64	47.5	63	61	61.3333	57.1667	0.25266	0.402778	0.326531	0.264624	0.318987	0.281106	0.327323	0.288239	0.229322	0.0967073
168795	hsa-miR-4706	0.659665	0.436089	77.5	121.5	83	84.5	75	64	13	-2	11.5	11.5	4	0	7.5	5.16667	0.0691489	N/A	0.0586735	0.0640669	0.0202532	N/A	0.0639112	0.04216	0.115899	0.734842
168755	hsa-miR-4479	N/A	N/A	62.5	98.5	61.5	68	58	55	0	-21	-7.5	-7	-9	-10	-9.5	-8.66667	N/A	N/A	N/A	N/A	N/A	N/A	N/A	N/A	N/A	N/A
168577		0.0679928	N/A	70	112.5	63	69	70	62	7	-11	-7	-7.5	0.5	-3.5	-3.66667	-3.5	0.037234	N/A	N/A	N/A	0.00253165	N/A	0.037234	0.00253165	N/A	N/A
168827	hsa-miR-548ac	N/A	N/A	65	107.5	63	61.5	59.5	54.5	3	-15	-4.5	-14	-11	-11	-5.5	-12	0.0159574	N/A	N/A	N/A	N/A	N/A	0.0159574	N/A	N/A	N/A
168676	hsa-miR-499b-5p	0.239195	N/A	73	119	68.5	77	67	58	10.5	-1	1.5	-2.5	1.5	-6	3.66667	-2.33333	0.0558511	N/A	0.00765306	N/A	0.00759494	N/A	0.0317521	0.00759494	1.07335	N/A
168852	hsa-miR-4764-5p	0.687342	0.153538	83	150	98.5	89.5	87.5	91	20.5	35.5	32	17.5	19	28	29.3333	21.5	0.109043	0.197222	0.163265	0.097493	0.0962025	0.129032	0.15651	0.107576	0.284175	0.172835
168611	hsa-miR-4753-3p	0.429775	0.0475035	84	148	79.5	83	76	76	22	22	12	9	6.5	10	18.6667	8.5	0.117021	0.122222	0.0612245	0.0501393	0.0329114	0.0460829	0.100156	0.0430445	0.337631	0.209246
168572	hsa-miR-4507	0.853198	0.0493692	130.5	186	130.5	133	123.5	126.5	68.5	60	63	56.5	54.5	60.5	63.8333	57.1667	0.364362	0.333333	0.321429	0.314763	0.275949	0.278802	0.339708	0.289838	0.0652474	0.0746376
168743	hsa-miR-548ad	N/A	N/A	65.5	109	62.5	71	59.5	56.5	2	-15	-7	-5	-10	-7.5	-6.66667	-7.5	0.0106383	N/A	N/A	N/A	N/A	N/A	0.0106383	N/A	N/A	N/A
168647		1.0117	0.848575	1143	1282.5	1145	1217.5	1192.5	1338	1078.5	1159	1078.5	1135	1123.5	1274.5	1105.33	1177.67	5.7367	6.43889	5.50255	6.32312	5.68861	5.87327	5.89271	5.96167	0.0826911	0.0547433
168812	hsa-miR-875-3p	1.1937	0.754579	140	167.5	86	168	100.5	109.5	75	43.5	18	91.5	31.5	44.5	45.5	55.8333	0.398936	0.241667	0.0918367	0.509749	0.159494	0.205069	0.244147	0.291437	0.628986	0.653424
169186	hsa-miR-4520a-3p	0.951636	0.955685	81.5	131	71.5	101.5	75	72.5	18.5	6.5	-1.5	25	4.5	6.5	7.83333	12	0.0984043	0.0361111	N/A	0.139276	0.0227848	0.0299539	0.0672577	0.0640048	0.654913	1.02
169118	hsa-miR-5009-3p	1.73449	0.132464	350.5	330.5	198	546	372.5	410.5	288	204	132	474	305	348.5	208	375.833	1.53191	1.13333	0.673469	2.64067	1.5443	1.60599	1.11291	1.93032	0.386005	0.319093
169320	hsa-miR-4468	0.685871	0.345283	107.5	251.5	192	126.5	135.5	160	42.5	123	126	52	67.5	94	97.1667	71.1667	0.226064	0.683333	0.642857	0.289694	0.341772	0.43318	0.517418	0.354882	0.489219	0.204676
169321	hsa-miR-4691-3p	1.09587	0.891602	85.5	131.5	69.5	93	79	71.5	20.5	5	3	15.5	9.5	7	9.5	10.6667	0.109043	0.0277778	0.0153061	0.086351	0.0481013	0.0322581	0.0507088	0.0555701	1.00381	0.500434
169070	hsa-miR-4695-3p	1.68087	0.0723578	10092	5068.5	10520	16815	13584	13915	10028.5	4951.5	10451	16741	13515	13851.5	8477	14702.5	53.3431	27.5083	53.3214	93.2646	68.4304	63.8318	44.7243	75.1756	0.333364	0.210619
169113	hsa-miR-4755-5p	0.404942	0.364614	80.5	179.5	75.5	94.5	78.5	71.5	19	60.5	8.5	21	8.5	7.5	29.3333	12.3333	0.101064	0.336111	0.0433673	0.116992	0.043038	0.0345622	0.160181	0.0648639	0.968076	0.699038
169182	hsa-miR-4728-3p	0.829607	0.0344906	190.5	260	220.5	195	184	205	129	138.5	157.5	118.5	116	136	141.667	123.5	0.68617	0.769444	0.803571	0.660167	0.587342	0.626728	0.753062	0.624746	0.0801937	0.0583488
169036	hsa-miR-4745-3p	0.0500999	N/A	71.5	117	66.5	68	69	57.5	9.5	-1.5	0	-6	0.5	-4	2.66667	-3.16667	0.0505319	N/A	N/A	N/A	0.00253165	N/A	0.0505319	0.00253165	N/A	N/A
169230	hsa-miR-4747-3p	N/A	N/A	72.5	131.5	70.5	68.5	66	62	10	9	-0.5	-8.5	-5.5	-3.5	6.16667	-5.83333	0.0531915	0.05	N/A	N/A	N/A	N/A	0.0515957	N/A	0.0437386	N/A
169157	hsa-miR-4755-3p	0.671361	0.348699	83.5	134	77.5	83.5	79	79.5	19	17	7	5.5	10.5	15.5	14.3333	10.5	0.101064	0.0944444	0.0357143	0.0306407	0.0531646	0.0714286	0.0770742	0.0517446	0.46671	0.394843
169000	hsa-miR-5707	N/A	N/A	66.5	103	59.5	65	55	52.5	3	-9.5	-10.5	-9	-11.5	-13	-5.66667	-11.1667	0.0159574	N/A	N/A	N/A	N/A	N/A	0.0159574	N/A	N/A	N/A
169319	hsa-miR-3136-3p	0.869064	0.64122	115	234	150.5	132	151.5	159	51.5	118	81.5	57.5	83	93	83.6667	77.8333	0.273936	0.655556	0.415816	0.320334	0.420253	0.428571	0.448436	0.38972	0.430138	0.154555
168996	hsa-miR-4524a-3p	0.0414366	N/A	77.5	129.5	83	72.5	68.5	66.5	13.5	7	11	-3	-1	0.5	10.5	-1.16667	0.0718085	0.0388889	0.0561224	N/A	N/A	0.00230415	0.0556066	0.00230415	0.296114	N/A
169064	hsa-miR-4778-3p	0.38779	0.301456	70.5	119	71	75	64	64.5	5.5	1	6.5	1.5	-4.5	2	4.33333	-0.333333	0.0292553	0.00555556	0.0331633	0.00835655	N/A	0.00921659	0.022658	0.00878657	0.659347	0.0692128
169112	hsa-miR-4727-3p	0.142071	0.0486668	78	141	74	78.5	74.5	67	17.5	21.5	7	1	4.5	1.5	15.3333	2.33333	0.0930851	0.119444	0.0357143	0.00557103	0.0227848	0.00691244	0.0827479	0.0117561	0.517373	0.814443
169169	hsa-miR-5684	1.29279	0.388928	2821	2035	5600	3889.5	4664.5	5426	2759	1915.5	5532	3813	4596	5361	3402.17	4590	14.6755	10.6417	28.2245	21.2423	23.2709	24.7051	17.8472	23.0728	0.516076	0.0754069
168987	hsa-miR-4523	0.226283	N/A	71.5	119	67	77	67.5	64.5	7.5	-5.5	-1.5	2	-2	1.5	0.166667	0.5	0.0398936	N/A	N/A	0.0111421	N/A	0.00691244	0.0398936	0.00902725	N/A	0.331307
169365	hsa-miR-3974	N/A	N/A	73	124	65.5	69	65.5	61.5	9	-3	-3	-4.5	-1.5	-5	1	-3.66667	0.0478723	N/A	N/A	N/A	N/A	N/A	0.0478723	N/A	N/A	N/A
169160	hsa-miR-4633-3p	N/A	N/A	69	122	64.5	66.5	63	58.5	6.5	-4	-2.5	-10.5	-5.5	-6.5	0	-7.5	0.0345745	N/A	N/A	N/A	N/A	N/A	0.0345745	N/A	N/A	N/A
168992	hsa-miR-5092	N/A	N/A	69.5	115	68	65.5	60.5	56.5	6	-7.5	0	-9	-9	-10	-0.5	-9.33333	0.0319149	N/A	N/A	N/A	N/A	N/A	0.0319149	N/A	N/A	N/A
168654		N/A	N/A	72	119	68	75.5	64.5	64	9.5	-1.5	0	-1	-3	-0.5	2.66667	-1.5	0.0505319	N/A	N/A	N/A	N/A	N/A	0.0505319	N/A	N/A	N/A
168713		0.370856	0.00291937	83	145.5	81	86.5	80.5	71	21	22	17.5	8	8.5	7	20.1667	7.83333	0.111702	0.122222	0.0892857	0.0445682	0.043038	0.0322581	0.107737	0.0399548	0.156145	0.167923
168957		N/A	N/A	65.5	104	62.5	65	62.5	58	2	-23	-6.5	-14.5	-6.5	-6	-9.16667	-9	0.0106383	N/A	N/A	N/A	N/A	N/A	0.0106383	N/A	N/A	N/A
168706		0.517617	0.0223886	90.5	157	89	86.5	83.5	81.5	26	33.5	23.5	14	15	16.5	27.6667	15.1667	0.138298	0.186111	0.119898	0.0779944	0.0759494	0.0760369	0.148102	0.0766602	0.230773	0.0150833
168761		0.163204	0.035542	78	136	77	71	70.5	67	14.5	14.5	8.5	-4.5	2.5	2	12.5	0	0.0771277	0.0805556	0.0433673	N/A	0.0126582	0.00921659	0.0670169	0.0109374	0.306679	0.222503
168842		1.05669	0.708547	338	331	435	354.5	366	436.5	274	211.5	368	278.5	298.5	369.5	284.5	315.5	1.45745	1.175	1.87755	1.55153	1.51139	1.70276	1.50333	1.58856	0.235155	0.0635275
169268		0.694663	0.535755	270.5	610	186	334	210	270.5	208.5	489	120	254	141	207	272.5	200.667	1.10904	2.71667	0.612245	1.41504	0.713924	0.953917	1.47932	1.02763	0.743578	0.346744
168936		0.966426	0.791554	269.5	407.5	343	326.5	334.5	321.5	206	288.5	274	255.5	265.5	258.5	256.167	259.833	1.09574	1.60278	1.39796	1.4234	1.3443	1.19124	1.36549	1.31965	0.186798	0.0894363
46839		N/A	N/A	73.5	119.5	76	72	71	61	9.5	2	6.5	-5.5	-0.5	-6.5	6	-4.16667	0.0505319	0.0111111	0.0331633	N/A	N/A	N/A	0.0316021	N/A	0.625171	N/A
28769		0.124732	0.00687201	87.5	139	85	81	77	66.5	25.5	25	15.5	3	4.5	1	22	2.83333	0.135638	0.138889	0.0790816	0.0167131	0.0227848	0.00460829	0.11787	0.0147021	0.285321	0.62941
42664		0.203902	0.0241015	74.5	125.5	78.5	85	71	71.5	11.5	5.5	9.5	0.5	1	4.5	8.83333	2	0.0611702	0.0305556	0.0484694	0.00278552	0.00506329	0.0207373	0.0467317	0.00952871	0.329137	1.02569
46340	hsa-miR-1289	0.252763	N/A	76.5	128	76.5	88.5	71.5	64.5	12	10	9	2.5	-0.5	-2.5	10.3333	-0.166667	0.0638298	0.0555556	0.0459184	0.0139276	N/A	N/A	0.0551012	0.0139276	0.162689	N/A
46627	hsa-miR-1271-5p	0.537938	0.168059	78.5	129	94.5	97.5	83.5	74.5	15.5	8.5	22.5	6	13	7	15.5	8.66667	0.0824468	0.0472222	0.114796	0.0334262	0.0658228	0.0322581	0.0814883	0.0438357	0.414747	0.434585
42750	hsa-miR-636	0.67949	0.232894	121	149	112.5	114.5	93	108	58	32	35	29	20	41	41.6667	30	0.308511	0.177778	0.178571	0.16156	0.101266	0.18894	0.22162	0.150589	0.339548	0.297865
42717	hsa-miR-92b-5p	0.668463	0.517047	103.5	116.5	87.5	113.5	94.5	91	40.5	-2	12.5	9	24	23.5	17	18.8333	0.215426	N/A	0.0637755	0.0501393	0.121519	0.108295	0.139601	0.0933177	0.76814	0.406929
11045	hsa-miR-302c-5p	1.24474	0.514953	518.5	226	410.5	486.5	461.5	462.5	457	106.5	335.5	377	390	394.5	299.667	387.167	2.43085	0.591667	1.71173	2.10028	1.97468	1.81797	1.57808	1.96431	0.587325	0.0720042
11274		0.104408	0.288637	80.5	120	82	98.5	74	67.5	15	2	5	1	0.5	-1	7.33333	0.166667	0.0797872	0.0111111	0.0255102	0.00557103	0.00253165	N/A	0.0388028	0.00405134	0.933342	0.530484
42640	hsa-miR-20b-5p	1.77331	0.0763578	116	126.5	141	166	170	157.5	50.5	18.5	69.5	71.5	95.5	88	46.1667	85	0.268617	0.102778	0.354592	0.398329	0.483544	0.40553	0.241996	0.429134	0.528937	0.110124
17562	ebv-miR-BHRF1-2-5p	1.36249	N/A	69	108	75.5	91	64	62.5	5	-8	2	4.5	-7	-8	-0.333333	-3.5	0.0265957	N/A	0.0102041	0.0250696	N/A	N/A	0.0183999	0.0250696	0.62993	N/A
14189		0.567243	0.224188	86.5	141	87.5	97	80	79	22	25	10	16	9.5	8	19	11.1667	0.117021	0.138889	0.0510204	0.0891365	0.0481013	0.0368664	0.10231	0.0580347	0.447113	0.474104
10937	hsa-miR-132-3p	0.321009	0.0980539	135	135	183.5	90.5	97.5	102	72.5	23.5	92.5	13	26.5	24	62.8333	21.1667	0.385638	0.130556	0.471939	0.0724234	0.134177	0.110599	0.329378	0.105733	0.538924	0.294734
32731	hsa-miR-190b	0.318551	0.00959407	86	144	90.5	100	78.5	80	24.5	27.5	18	8.5	6.5	8.5	23.3333	7.83333	0.130319	0.152778	0.0918367	0.0473538	0.0329114	0.0391705	0.124978	0.0398119	0.246601	0.181918
46239		0.160014	0.0644587	80	125.5	87	83.5	70.5	65	18	8	13	3.5	0.5	-4	13	0	0.0957447	0.0444444	0.0663265	0.0194986	0.00253165	N/A	0.0688386	0.0110151	0.37395	1.08918
17359	ebv-miR-BART4-5p	0.525017	0.217114	86	159.5	97.5	94.5	81.5	94	21.5	46	20.5	14	11.5	24.5	29.3333	16.6667	0.114362	0.255556	0.104592	0.0779944	0.0582278	0.112903	0.15817	0.0830418	0.53411	0.333386
19016	hsa-miR-217	N/A	N/A	68	113.5	72.5	73.5	68.5	63.5	8	-4.5	0	-7.5	-2	-4	1.16667	-4.5	0.0425532	N/A	N/A	N/A	N/A	N/A	0.0425532	N/A	N/A	N/A
46684	hsa-miR-1225-3p	0.481767	0.38262	79	136	82	83.5	79.5	69.5	14	25.5	6	6.5	8.5	0	15.1667	5	0.0744681	0.141667	0.0306122	0.0362117	0.043038	N/A	0.082249	0.0396248	0.680064	0.121815
46531	hsa-miR-1231	0.543902	0.0233797	80	130.5	93	93	81	76	18	20	21	14	11.5	7.5	19.6667	11	0.0957447	0.111111	0.107143	0.0779944	0.0582278	0.0345622	0.104666	0.0569282	0.0762135	0.381977
17571	kshv-miR-K12-11-3p	0.486441	0.0733081	88	128	96	79.5	78.5	83.5	25	15	24	-0.5	8.5	14.5	21.3333	7.5	0.132979	0.0833333	0.122449	N/A	0.043038	0.0668203	0.11292	0.0549291	0.231654	0.306151
11268		0.893202	0.592547	144	203.5	136.5	132	131.5	171.5	83	75.5	66	47	64	105	74.8333	72	0.441489	0.419444	0.336735	0.261838	0.324051	0.483871	0.399223	0.356587	0.138337	0.321202
17691		0.297443	0.0361063	93	152	86.5	79.5	78.5	75	30	33.5	16	5	10.5	10	26.5	8.5	0.159574	0.186111	0.0816327	0.0278552	0.0531646	0.0460829	0.142439	0.0423676	0.381257	0.308192
46556	hsa-miR-623	0.3327	0.0275727	108	175.5	99.5	95	90	81	45.5	59	32.5	15	20	13	45.6667	16	0.242021	0.327778	0.165816	0.0835655	0.101266	0.0599078	0.245205	0.0815797	0.330448	0.254357
27838	hsa-miR-302d-3p	0.278406	0.00763312	103	161	99.5	94	85	77.5	39	42.5	28	10.5	12.5	9	36.5	10.6667	0.207447	0.236111	0.142857	0.0584958	0.0632911	0.0414747	0.195472	0.0544205	0.244365	0.210674
42700	hsa-miR-631	0.762453	0.0938539	95.5	140.5	95.5	103	90.5	92.5	29.5	25	23	20	17	25.5	25.8333	20.8333	0.156915	0.138889	0.117347	0.111421	0.0860759	0.117512	0.137717	0.105003	0.143846	0.158773
46879		1.03359	0.906928	212	168	200.5	184	193.5	211	151.5	53.5	123	91.5	122	143.5	109.333	119	0.805851	0.297222	0.627551	0.509749	0.617722	0.66129	0.576875	0.596254	0.447365	0.130847
17508	hcmv-miR-UL112-3p	0.63965	0.0525728	107.5	150	102	112.5	98	94	42	32	29	17.5	26	26.5	34.3333	23.3333	0.223404	0.177778	0.147959	0.097493	0.131646	0.12212	0.183047	0.117086	0.207583	0.150521
42778	hsa-let-7g-3p	0.453622	0.0764644	86	135	92.5	94.5	79	74.5	20	14	13	-2	9.5	6	15.6667	4.5	0.106383	0.0777778	0.0663265	N/A	0.0481013	0.0276498	0.0834958	0.0378755	0.247094	0.381814
42536		0.198167	0.184802	84.5	124.5	82	99	76.5	66.5	20	6	9.5	-3	4	1	11.8333	0.666667	0.106383	0.0333333	0.0484694	N/A	0.0202532	0.00460829	0.0627286	0.0124307	0.614646	0.889939
46835		0.338408	0.0812846	87.5	153	91	102.5	75.5	79	23	36.5	15	11.5	6	9	24.8333	8.83333	0.12234	0.202778	0.0765306	0.0640669	0.0303797	0.0414747	0.133883	0.0453071	0.477359	0.378913
17463	hsa-miR-151a-3p	0.73909	0.223744	467	343	449.5	262.5	341	416.5	402	226.5	378	175	268.5	347.5	335.5	263.667	2.1383	1.25833	1.92857	0.97493	1.35949	1.60138	1.77507	1.31194	0.258935	0.240806
46944	hsa-miR-1297	1.36424	0.437382	229	158.5	330	283	330	253.5	165	41.5	254	201.5	259.5	183	153.5	214.667	0.87766	0.230556	1.29592	1.12256	1.31392	0.843318	0.801378	1.09327	0.669799	0.216476
46860	hsa-miR-1205	0.317322	0.0189416	94	158.5	97.5	88	85	80.5	30.5	37.5	22	7	13	10.5	30	10.1667	0.162234	0.208333	0.112245	0.0389972	0.0658228	0.0483871	0.160937	0.051069	0.298609	0.266549
42862		0.310873	0.242706	86.5	135.5	82.5	79.5	77.5	76.5	20.5	16.5	4	-2	4.5	5	13.6667	2.5	0.109043	0.0916667	0.0204082	N/A	0.0227848	0.0230415	0.0737058	0.0229131	0.637231	0.00792075
42822		N/A	N/A	69.5	108.5	79	77.5	69.5	65	5.5	-5	0	-3.5	-0.5	-5.5	0.166667	-3.16667	0.0292553	N/A	N/A	N/A	N/A	N/A	0.0292553	N/A	N/A	N/A
46661	hsa-miR-1294	0.410159	0.0151442	104.5	154	105	94.5	88	86.5	38	41	27.5	14	18.5	13.5	35.5	15.3333	0.202128	0.227778	0.140306	0.0779944	0.0936709	0.062212	0.190071	0.0779591	0.23657	0.201766
42541	hsa-miR-302a-5p	0.286475	0.109933	78	131.5	83	86.5	71.5	67.5	11.5	17	9	6	1	-6	12.5	0.333333	0.0611702	0.0944444	0.0459184	0.0334262	0.00506329	N/A	0.0671777	0.0192447	0.369387	1.04213
17749		1.05759	0.646735	17086	17844	16940.5	15170.5	17875	25405.5	17021.5	17732.5	16873	15090	17806	25337.5	17209	19411.2	90.5399	98.5139	86.0867	84.0669	90.157	116.763	91.7135	96.9955	0.0686502	0.179262
46787		0.423388	0.202263	76.5	127.5	80.5	83	77	68	13.5	13	5	4.5	4.5	-0.5	10.5	2.83333	0.0718085	0.0722222	0.0255102	0.0250696	0.0227848	N/A	0.0565136	0.0239272	0.475116	0.0675221
27540		0.734969	0.186495	341.5	265.5	313.5	245.5	226	267	279.5	154.5	206.5	161	156	176	213.5	164.333	1.4867	0.858333	1.05357	0.896936	0.789873	0.81106	1.13287	0.832623	0.283883	0.068092
11058	hsa-miR-325	0.416994	0.0706979	94	161.5	105	93.5	87	81.5	30	51	27.5	16.5	18.5	12.5	36.1667	15.8333	0.159574	0.283333	0.140306	0.091922	0.0936709	0.0576037	0.194405	0.0810655	0.399243	0.250876
46422		0.411963	0.0570651	117	184	102.5	112	88	86.5	55	69	35	29	18.5	21	53	22.8333	0.292553	0.383333	0.178571	0.16156	0.0936709	0.0967742	0.284819	0.117335	0.360228	0.326683
42744	hsa-miR-23a-3p	1.06534	0.718107	21538.5	12767.5	24641	18236.5	22973	24591	21476	12650	24571.5	18154.5	22904	24524.5	19565.8	21861	114.234	70.2778	125.365	101.139	115.97	113.016	103.292	110.042	0.281996	0.0713353
33163		0.337953	0.00886671	89.5	156.5	92	88	80	75	26	32	22	8.5	11.5	8.5	26.6667	9.5	0.138298	0.177778	0.112245	0.0473538	0.0582278	0.0391705	0.142774	0.0482507	0.2311	0.198138
14271	hsa-miR-539-5p	0.622818	0.0375714	151	185.5	135.5	119.5	128	116	87.5	66	66.5	38	59.5	47	73.3333	48.1667	0.465426	0.366667	0.339286	0.211699	0.301266	0.21659	0.390459	0.243185	0.169929	0.207081
42971	hsa-miR-96-3p	N/A	N/A	77	117	72	76.5	69.5	64	10	-0.5	-0.5	-4.5	-2	-3	3	-3.16667	0.0531915	N/A	N/A	N/A	N/A	N/A	0.0531915	N/A	N/A	N/A
42502	hsa-miR-204-3p	0.954172	0.893302	1668.5	530.5	1382	1075	1303	1156	1607.5	419	1304	984	1229.5	1089.5	1110.17	1101	8.55053	2.32778	6.65306	5.48189	6.22532	5.02074	5.84379	5.57598	0.545765	0.108999
29872	hsa-miR-340-5p	1.04662	0.65239	446	396.5	485	458.5	446	495	378.5	276	411	367	375.5	425.5	355.167	389.333	2.0133	1.53333	2.09694	2.04457	1.90127	1.96083	1.88119	1.96889	0.161675	0.0365639
46744	hsa-miR-526b-5p	0.24452	0.0543297	98.5	153	90.5	95.5	85.5	78	33	39.5	16	0.5	12	11.5	29.5	8	0.175532	0.219444	0.0816327	0.00278552	0.0607595	0.0529954	0.15887	0.0388468	0.443134	0.810114
17540		0.437292	0.141187	83	133.5	88.5	97	80.5	68.5	18	17.5	9.5	4	9.5	-1.5	15	4	0.0957447	0.0972222	0.0484694	0.0222841	0.0481013	N/A	0.0804788	0.0351927	0.344573	0.518729
11074	hsa-miR-34c-5p	0.893405	0.498265	200.5	249.5	218.5	172.5	203.5	242.5	132.5	130.5	144.5	82.5	130.5	177	135.833	130	0.704787	0.725	0.737245	0.45961	0.660759	0.815668	0.722344	0.645346	0.0226914	0.276641
46416	hsa-miR-1293	1.01615	0.918958	114	161	118	124.5	121.5	120.5	51.5	46	32	41	47.5	51	43.1667	46.5	0.273936	0.255556	0.163265	0.228412	0.240506	0.235023	0.230919	0.234647	0.256827	0.0258081
46789	hsa-miR-513b-5p	0.695419	0.166524	123	187	121	112	116.5	125.5	58.5	71.5	42.5	31.5	46	51	57.5	42.8333	0.31117	0.397222	0.216837	0.175487	0.232911	0.235023	0.30841	0.214474	0.292547	0.157501
4390		0.471496	0.0626104	98.5	171	114.5	110	89.5	90.5	34	53.5	33.5	25	17	17.5	40.3333	19.8333	0.180851	0.297222	0.170918	0.139276	0.0860759	0.0806452	0.216331	0.101999	0.324642	0.317618
42787		0.489303	0.102527	97.5	155	90.5	95.5	87	88.5	34	35.5	16.5	17	15.5	11.5	28.6667	14.6667	0.180851	0.197222	0.0841837	0.0947075	0.078481	0.0529954	0.154086	0.0753946	0.396453	0.278888
46331		0.0479775	0.0255772	76	126	77	83.5	71.5	66.5	13	17	0	0.5	1	-8	10	-2.16667	0.0691489	0.0944444	N/A	0.00278552	0.00506329	N/A	0.0817967	0.0039244	0.218672	0.410414
42522	ebv-miR-BART19-3p	0.704567	0.0318659	1060	993.5	897	744.5	620	896.5	998.5	881	823	660	551.5	798.5	900.833	670	5.31117	4.89444	4.19898	3.67688	2.79241	3.67972	4.80153	3.383	0.117022	0.15119
17528		0.161255	0.216227	73	131	79.5	80.5	69.5	71.5	13.5	21	3.5	1.5	-2	3	12.6667	0.833333	0.0718085	0.116667	0.0178571	0.00835655	N/A	0.0138249	0.0687774	0.0110907	0.719341	0.348643
46622	hsa-miR-518f-5p	0.616016	0.507943	83	118.5	83.5	87	76	73	16	1	9.5	6.5	7.5	2.5	8.83333	5.5	0.0851064	0.00555556	0.0484694	0.0362117	0.0379747	0.0115207	0.0463771	0.028569	0.858541	0.517713
17612	hsa-miR-555	0.488729	0.455853	77.5	119	76.5	83.5	69.5	67	13.5	-0.5	4	4	4.5	-2	5.66667	2.16667	0.0718085	N/A	0.0204082	0.0222841	0.0227848	N/A	0.0461083	0.0225345	0.788264	0.015711
46616		1.02355	0.947229	144	139	138	129	135	115.5	79.5	23	55	52.5	67.5	47	52.5	55.6667	0.422872	0.127778	0.280612	0.292479	0.341772	0.21659	0.277087	0.283614	0.532607	0.222346
146075		0.497731	0.0495031	82.5	127	86.5	83	83	74	22.5	19	14.5	9.5	13.5	6	18.6667	9.66667	0.119681	0.105556	0.0739796	0.0529248	0.0683544	0.0276498	0.0997387	0.049643	0.234606	0.413952
146181		N/A	N/A	72	116	69.5	79.5	72.5	64	9	-4	-3	-3	0	-2	0.666667	-1.66667	0.0478723	N/A	N/A	N/A	N/A	N/A	0.0478723	N/A	N/A	N/A
146145		0.550346	0.0201562	146	178.5	138	114	115	109	83.5	57.5	63	32	44.5	42	68	39.5	0.444149	0.319444	0.321429	0.178273	0.225316	0.193548	0.361674	0.199046	0.197505	0.120569
24226	spike_control_v2_16	0.761427	0.614194	423	150	369.5	240.5	261.5	272.5	360	32	300	153	189.5	205.5	230.667	182.667	1.91489	0.177778	1.53061	0.852368	0.959494	0.947005	1.20776	0.919622	0.75549	0.0636976
146150		0.396038	0.307593	80	122.5	74	86	75.5	71.5	14	6	4	-0.5	3.5	3.5	8	2.16667	0.0744681	0.0333333	0.0204082	N/A	0.0177215	0.016129	0.0427365	0.0169253	0.660559	0.0665312
42650		1.41617	0.124736	238.5	241	285	267.5	362	371	174.5	125	216.5	176	292	304.5	172	257.5	0.928191	0.694444	1.10459	0.980501	1.47848	1.40323	0.909076	1.2874	0.226319	0.208509
10991		0.349057	0.00956986	92.5	145	96	87	82.5	71	28	28	21.5	10	13	5	25.8333	9.33333	0.148936	0.155556	0.109694	0.0557103	0.0658228	0.0230415	0.138062	0.0481915	0.179552	0.463977
146005	hsa-miR-3129-5p	0.357555	0.0701491	96	164.5	98.5	89.5	89.5	83	33	48	23	4.5	20	16	34.6667	13.5	0.175532	0.266667	0.117347	0.0250696	0.101266	0.0737327	0.186515	0.0666894	0.403524	0.578552
146128		0.426314	0.160693	91	159	99	87.5	85.5	83.5	25.5	42.5	14.5	6	15	17.5	27.5	12.8333	0.135638	0.236111	0.0739796	0.0334262	0.0759494	0.0806452	0.148576	0.0633402	0.550804	0.410679
146007		0.487211	0.182813	97	139.5	87	85	87	79	30	25	9.5	5.5	15.5	13	21.5	11.3333	0.159574	0.138889	0.0484694	0.0306407	0.078481	0.0599078	0.115644	0.0563432	0.510941	0.428065
145659	RNU1	0.348948	0.344935	299.5	1998	581.5	323	433.5	460	234.5	1884.5	495.5	236	363	394.5	871.5	331.167	1.24734	10.4694	2.52806	1.31476	1.83797	1.81797	4.74828	1.6569	1.05215	0.178931
17858		0.455375	0.112603	144.5	262	154	129	117.5	128	79.5	152.5	76	48	43.5	58	102.667	49.8333	0.422872	0.847222	0.387755	0.267409	0.220253	0.267281	0.552617	0.251648	0.462779	0.108043
146085	hsa-miR-3170	0.495981	0.190971	95.5	164.5	99	101.5	88.5	83.5	31.5	46	17	22	18	8.5	31.5	16.1667	0.167553	0.255556	0.0867347	0.122563	0.0911392	0.0391705	0.169948	0.0842908	0.496834	0.499649
146188		1.05494	0.728049	65535	42353.5	65535	65535	65535	58903	65469.5	42235	65456	65452	65463.5	58831.5	57720.2	63249	348.242	234.639	333.959	364.635	331.461	271.113	305.613	322.403	0.202475	0.147066
146170		1.22669	0.649109	1778	589.5	689.5	888	1594.5	1397	1714	471.5	612.5	804	1524.5	1309	932.667	1212.5	9.11702	2.61944	3.125	4.47911	7.71899	6.03226	4.95382	6.07678	0.729596	0.266654
146082		0.582558	0.05967	111.5	149.5	114.5	109	103.5	87	49.5	39.5	36	26.5	32.5	16.5	41.6667	25.1667	0.263298	0.219444	0.183673	0.147632	0.164557	0.0760369	0.222139	0.129409	0.17953	0.36311
46435		1.06769	0.534298	17129	20115.5	23460.5	18429	24631	25328.5	17068	20005	23389	18350	24560.5	25262.5	20154	22724.3	90.7872	111.139	119.332	102.228	124.357	116.417	107.086	114.334	0.137249	0.0980491
146218		0.907621	0.688473	91	138.5	92	102	86.5	89.5	25	21.5	15.5	24	18	16.5	20.6667	19.5	0.132979	0.119444	0.0790816	0.133705	0.0911392	0.0760369	0.110502	0.100294	0.253746	0.298164
146116	hsa-miR-2116-3p	0.572765	0.0105294	112.5	162	112.5	100.5	104.5	93.5	49	48	41.5	27.5	31.5	24	46.1667	27.6667	0.260638	0.266667	0.211735	0.153203	0.159494	0.110599	0.246347	0.141099	0.122291	0.188521
145980	hsa-miR-939-5p	0.376527	0.100626	89	143	89	83	80.5	82	24	29	10	8.5	10	6.5	21	8.33333	0.12766	0.161111	0.0510204	0.0473538	0.0506329	0.0299539	0.113264	0.0426469	0.498302	0.260606
145973	hsa-miR-664a-3p	0.589058	0.399245	260	721	296.5	277	294	287.5	189.5	613.5	206	196.5	226	213	336.333	211.833	1.00798	3.40833	1.05102	1.09471	1.1443	0.981567	1.82244	1.07353	0.753707	0.0776978
145965	hsa-miR-518d-3p	N/A	N/A	70.5	113.5	77	69.5	61.5	64	9	5.5	1.5	-5.5	-5.5	-6.5	5.33333	-5.83333	0.0478723	0.0305556	0.00765306	N/A	N/A	N/A	0.0286937	N/A	0.703089	N/A
145687	hsa-miR-384	0.148384	0.254935	83	133	74.5	88.5	72	65	19	9	2.5	2	1	0	10.1667	1	0.101064	0.05	0.0127551	0.0111421	0.00506329	N/A	0.0546063	0.00810268	0.811888	0.530484
145651	hsa-miR-99a-3p	0.730277	0.157266	99.5	138	95.5	97	94	93	33.5	21	26.5	14.5	21.5	27	27	21	0.178191	0.116667	0.135204	0.0807799	0.108861	0.124424	0.143354	0.104688	0.220166	0.211286
145677	hsa-miR-139-5p	0.970984	0.924681	130	183	105.5	149.5	104.5	142	67	67	35	66	34	74	56.3333	58	0.356383	0.372222	0.178571	0.367688	0.172152	0.341014	0.302392	0.293618	0.355578	0.361132
145633	hsa-let-7d-3p	0.957938	0.873852	490	286.5	490	382	474.5	385.5	426.5	175.5	417	295	404	316	339.667	338.333	2.26862	0.975	2.12755	1.64345	2.04557	1.45622	1.79039	1.71508	0.396373	0.175579
146008	hsa-miR-26b-5p	1.21653	0.604581	1495.5	538.5	2343	1493	2070.5	1848.5	1431.5	420	2269.5	1412	1998.5	1780	1373.67	1730.17	7.61436	2.33333	11.5791	7.8663	10.119	8.20276	7.17559	8.72935	0.646423	0.139204
145720		0.672816	0.163274	90.5	145	96	111.5	86.5	77.5	25.5	24	19	21.5	14.5	11.5	22.8333	15.8333	0.135638	0.133333	0.0969388	0.119777	0.0734177	0.0529954	0.12197	0.0820634	0.177981	0.416995
145643	hsa-miR-382-5p	1.16861	0.431713	282.5	249	265.5	237.5	300	351	217.5	129	192.5	154	233	282	179.667	223	1.15691	0.716667	0.982143	0.857939	1.17975	1.29954	0.951908	1.11241	0.232875	0.205295
147539		0.172223	N/A	86	127.5	83	79	70.5	66	19.5	8	9	2	-0.5	-1	12.1667	0.166667	0.103723	0.0444444	0.0459184	0.0111421	N/A	N/A	0.0646954	0.0111421	0.522561	N/A
147861		1.14461	0.734215	9168	2799.5	15625	8642	11388	12704.5	9104	2685	15527	8552	11317.5	12636	9105.33	10835.2	48.4255	14.9167	79.2194	47.6435	57.3038	58.2304	47.5205	54.3926	0.676779	0.107795
147910		0.688503	0.110335	94	145.5	102.5	99.5	92.5	89	28	28.5	18.5	15	19	21	25	18.3333	0.148936	0.158333	0.0943878	0.0835655	0.0962025	0.0967742	0.133886	0.0921807	0.257887	0.0809987
147864	hsv2-miR-H24	0.364143	0.0855457	115.5	221	135.5	110.5	104.5	92	52	108.5	56	28.5	31.5	23	72.1667	27.6667	0.276596	0.602778	0.285714	0.158774	0.159494	0.105991	0.388363	0.14142	0.478277	0.216974
147895	kshv-miR-K12-2-3p	0.211852	0.24473	74.5	119.5	72	81	72	63	10.5	3.5	-5.5	1.5	1.5	-6.5	2.83333	-1.16667	0.0558511	0.0194444	N/A	0.00835655	0.00759494	N/A	0.0376478	0.00797574	0.683796	0.0675221
147953	hsa-miR-491-5p	0.47528	0.00426063	126	177.5	132.5	96	101	112	63	57.5	56	18.5	31.5	40	58.8333	30	0.335106	0.319444	0.285714	0.103064	0.159494	0.184332	0.313422	0.148963	0.0805332	0.279564
147817	hsa-miR-3196	1.70781	0.191945	374.5	144	425.5	406	477.5	553	313	26	346	326.5	405.5	484.5	228.333	405.5	1.66489	0.144444	1.76531	1.81894	2.05316	2.23272	1.19155	2.03494	0.762208	0.101963
147831	kshv-miR-K12-1-3p	0.373294	0.463751	88	269.5	87.5	108.5	89.5	99.5	22	157.5	8	27	20.5	28.5	62.5	25.3333	0.117021	0.875	0.0408163	0.150418	0.103797	0.131336	0.344279	0.128517	1.33959	0.18237
147629		0.982227	0.9137	990.5	868.5	757.5	975	884.5	790.5	927.5	756.5	682	894.5	816.5	710.5	788.667	807.167	4.93351	4.20278	3.47959	4.98329	4.13418	3.27419	4.20529	4.13055	0.172868	0.206886
147898	hsa-miR-2861	0.276823	0.049837	91.5	146	99	88.5	76.5	77	22.5	33.5	14.5	8	6.5	6	23.5	6.83333	0.119681	0.186111	0.0739796	0.0445682	0.0329114	0.0276498	0.126591	0.0350431	0.445406	0.247077
147833		0.452906	0.0869118	83.5	132.5	84.5	84	77	73.5	20.5	13.5	11	7.5	10.5	3	15	7	0.109043	0.075	0.0561224	0.0417827	0.0531646	0.0138249	0.080055	0.0362574	0.335017	0.558328
147743	hsa-miR-4275	1.94954	0.00996745	660.5	770	515.5	1056	1115	1507	590	656	419.5	979.5	1046	1441.5	555.167	1155.67	3.1383	3.64444	2.14031	5.45682	5.2962	6.64286	2.97435	5.79863	0.257318	0.126844
147799	hsa-miR-3156-5p	0.668254	0.439285	98	146	83	99.5	86	88.5	36.5	34.5	7	22	15.5	17.5	26	18.3333	0.194149	0.191667	0.0357143	0.122563	0.078481	0.0806452	0.14051	0.0938963	0.645963	0.264647
147763	hsa-miR-4272	N/A	N/A	71.5	115.5	71	71.5	68.5	63.5	8	1.5	-1	-3.5	-0.5	-3.5	2.83333	-2.5	0.0425532	0.00833333	N/A	N/A	N/A	N/A	0.0254433	N/A	0.951022	N/A
147921	hsa-miR-3131	0.263143	0.0832599	84.5	128.5	82	80	74.5	67.5	19.5	13	9.5	-4.5	5.5	2.5	14	1.16667	0.103723	0.0722222	0.0484694	N/A	0.0278481	0.0115207	0.074805	0.0196844	0.370529	0.586514
148002		0.55989	0.0598666	315	478	545	285.5	302	266.5	250.5	365	473.5	203	231.5	202	363	212.167	1.33245	2.02778	2.41582	1.13092	1.17215	0.930876	1.92535	1.07798	0.285092	0.119719
148593	hsa-miR-3605-3p	1.96492	0.0472259	139	147.5	115	165.5	173.5	182.5	77.5	25	41	80	101	116.5	47.8333	99.1667	0.412234	0.138889	0.209184	0.445682	0.511392	0.536866	0.253436	0.49798	0.560079	0.0944781
147625		0.118987	N/A	70.5	103	70	70.5	70.5	58.5	8	-18	-1.5	-6	1	-10	-3.83333	-5	0.0425532	N/A	N/A	N/A	0.00506329	N/A	0.0425532	0.00506329	N/A	N/A
148058	hsa-miR-3672	N/A	N/A	66.5	109.5	73	69	65.5	58	4.5	-7	3	-10	-5.5	-8.5	0.166667	-8	0.0239362	N/A	0.0153061	N/A	N/A	N/A	0.0196211	N/A	0.31101	N/A
148420	hsa-miR-3607-3p	0.695012	0.253677	3587.5	1702	3538	1510	2194.5	2846	3523.5	1587.5	3468	1418	2122.5	2779	2859.67	2106.5	18.742	8.81944	17.6939	7.89972	10.7468	12.8065	15.0851	10.4843	0.361381	0.235005
148434	hsa-miR-3692-3p	0.402784	0.0873065	82	128.5	81.5	96.5	80	73.5	19	13	8	2.5	7	8	13.3333	5.83333	0.101064	0.0722222	0.0408163	0.0139276	0.035443	0.0368664	0.0713675	0.0287457	0.422221	0.447113
14264	spike_control_v1_c	0.322531	0.401334	80	123.5	75.5	85.5	76	63.5	16	7.5	1	1	4.5	-4	8.16667	0.5	0.0851064	0.0416667	0.00510204	0.00557103	0.0227848	N/A	0.0439584	0.0141779	0.911121	0.858517
148063	hsa-miR-3713	0.648051	0.247938	88.5	139	95.5	115	84	74.5	24.5	23	16	21.5	13	7.5	21.1667	14	0.130319	0.127778	0.0816327	0.119777	0.0658228	0.0345622	0.113243	0.0733874	0.242001	0.587406
148679		0.820521	0.298063	47905	65535	45902	46776.5	44699	46221.5	47840	65414	45803	46682	44628	46155.5	53019	45821.8	254.468	363.411	233.689	260.067	225.965	212.698	283.856	232.91	0.245462	0.104917
148382	hsa-miR-3609	0.308803	0.220747	81	133	86.5	84.5	76	69	13	19	5	-3	4.5	4	12.3333	1.83333	0.0691489	0.105556	0.0255102	N/A	0.0227848	0.0184332	0.0667382	0.020609	0.600512	0.149307
148465	hsa-miR-3611	0.785904	0.489239	376	217	376.5	235	302.5	274	315	104	303.5	157	228.5	207.5	240.833	197.667	1.67553	0.577778	1.54847	0.874652	1.15696	0.956221	1.26726	0.995945	0.473841	0.145878
147589	hsa-miR-1193	0.345171	0.0512384	83	142	95.5	89	81.5	72	22	27.5	13.5	9	10	3.5	21	7.5	0.117021	0.152778	0.0688776	0.0501393	0.0506329	0.016129	0.112892	0.0389671	0.372942	0.507605
147621	hsa-miR-4278	0.301596	0.100967	80	142	85.5	85.5	73	69.5	18.5	24	7.5	8.5	4	3	16.6667	5.16667	0.0984043	0.133333	0.0382653	0.0473538	0.0202532	0.0138249	0.090001	0.0271439	0.534304	0.655575
147633	hsa-miR-3163	N/A	N/A	74.5	113.5	70	71	65	61.5	9	-6.5	-8.5	-7.5	-5.5	-8	-2	-7	0.0478723	N/A	N/A	N/A	N/A	N/A	0.0478723	N/A	N/A	N/A
147957	hsa-miR-412-5p	0.50016	0.159456	91.5	138	93	83	86	81	20.5	26	12	3	15.5	13.5	19.5	10.6667	0.109043	0.144444	0.0612245	0.0167131	0.078481	0.062212	0.104904	0.0524687	0.398118	0.61019
148380	hsa-miR-3913-5p	0.506094	0.339574	84	129	89	85	81.5	73.5	20.5	19.5	2	6.5	11.5	4.5	14	7.5	0.109043	0.108333	0.0102041	0.0362117	0.0582278	0.0207373	0.07586	0.0383923	0.749549	0.490727
148080	hsa-miR-3921	0.391595	N/A	80.5	127	86	78.5	73.5	68.5	11	14	7.5	-1	4.5	-1.5	10.8333	0.666667	0.0585106	0.0777778	0.0382653	N/A	0.0227848	N/A	0.0581846	0.0227848	0.339579	N/A
148403		0.464978	0.10146	83.5	140	90.5	83	80	74	18	17.5	9	7.5	10.5	3.5	14.8333	7.16667	0.0957447	0.0972222	0.0459184	0.0417827	0.0531646	0.016129	0.0796284	0.0370254	0.366742	0.512365
148595	hsa-miR-34a-3p	0.663973	0.147073	96	132	114.5	90	94	89.5	32.5	18.5	37	16.5	25	19.5	29.3333	20.3333	0.172872	0.102778	0.188776	0.091922	0.126582	0.0898618	0.154809	0.102789	0.295566	0.200719
148581		0.167553	0.0975866	84.5	123.5	83.5	78.5	71.5	73.5	21.5	14.5	8	2	3	0	14.6667	1.66667	0.114362	0.0805556	0.0408163	0.0111421	0.0151899	N/A	0.0785779	0.013166	0.468485	0.217397
148292		N/A	N/A	66.5	121.5	75	69	65.5	63	7	9.5	0.5	-8	0	-6	5.66667	-4.66667	0.037234	0.0527778	0.00255102	N/A	N/A	N/A	0.0308543	N/A	0.8334	N/A
148480	hsa-miR-494-5p	0.590029	0.0637226	132	183	111	121	107.5	112	69.5	68	43.5	30	39	45	60.3333	38	0.369681	0.377778	0.221939	0.167131	0.197468	0.207373	0.323132	0.190658	0.271498	0.109977
148373		0.547092	0.263388	103	140.5	83	83	90	80.5	37	19	14	6	21.5	13.5	23.3333	13.6667	0.196809	0.105556	0.0714286	0.0334262	0.108861	0.062212	0.124598	0.0681663	0.520257	0.55846
148089	hsa-miR-208a-3p	N/A	N/A	71	111	67	68.5	68	63.5	8.5	-10	-2.5	-6.5	-3.5	-1	-1.33333	-3.66667	0.0452128	N/A	N/A	N/A	N/A	N/A	0.0452128	N/A	N/A	N/A
148174		0.372192	0.0231037	88	140.5	85	87	85	73	24	23	16	4.5	13	7.5	21	8.33333	0.12766	0.127778	0.0816327	0.0250696	0.0658228	0.0345622	0.112357	0.0418182	0.236816	0.50991
148213		0.257794	0.0169545	84	134	83	83	77	72	20.5	16.5	12.5	0.5	7	6.5	16.5	4.66667	0.109043	0.0916667	0.0637755	0.00278552	0.035443	0.0299539	0.0881616	0.0227275	0.259026	0.76942
148545		0.320963	0.0198616	86.5	135	87	95	76	71	24	18	13.5	7	7	4.5	18.5	6.16667	0.12766	0.1	0.0688776	0.0389972	0.035443	0.0207373	0.0988457	0.0317259	0.297514	0.305141
148271		0.523886	0.0460231	114.5	171	115	114	94	103	50	54	34.5	20	22	36	46.1667	26	0.265957	0.3	0.17602	0.111421	0.111392	0.165899	0.247326	0.129571	0.258992	0.24281
148342		0.60653	0.193099	106	131.5	106	108	90.5	88	41	16.5	27	14	20	20	28.1667	18	0.218085	0.0916667	0.137755	0.0779944	0.101266	0.0921659	0.149169	0.0904754	0.428892	0.12962
148053		0.66539	0.448493	110	195.5	103	117.5	101	120	43.5	80.5	21.5	23.5	29.5	53	48.5	35.3333	0.231383	0.447222	0.109694	0.130919	0.149367	0.24424	0.262766	0.174842	0.650535	0.347765
148297		0.232017	0.0280459	84.5	132	88	97	74.5	74	19.5	12.5	9.5	1.5	3.5	5.5	13.8333	3.5	0.103723	0.0694444	0.0484694	0.00835655	0.0177215	0.0253456	0.0738791	0.0171412	0.377545	0.496428
148075		0.219165	0.0234378	80.5	137	86	95	74.5	70	17	23	-1	8	4	1.5	13	4.5	0.0904255	0.127778	N/A	0.0445682	0.0202532	0.00691244	0.109102	0.0239113	0.242086	0.798475
148175		1.05245	0.826885	279.5	223.5	314	236.5	261.5	342	213.5	109.5	237.5	159	190.5	273.5	186.833	207.667	1.13564	0.608333	1.21173	0.885794	0.964557	1.26037	0.985235	1.03691	0.333541	0.190461
148083		0.366746	0.403204	78.5	122	85	76.5	71	74.5	14.5	6.5	2	-1	0.5	6	7.66667	1.83333	0.0771277	0.0361111	0.0102041	N/A	0.00253165	0.0276498	0.0411476	0.0150907	0.820093	1.17696
148337		0.613362	0.410403	90.5	149	93.5	94	84.5	77.5	26.5	33.5	5	16.5	15	10.5	21.6667	14	0.140957	0.186111	0.0255102	0.091922	0.0759494	0.0483871	0.117526	0.0720862	0.704733	0.30551
148633		0.8803	0.529485	767.5	1232.5	900.5	901	906	848.5	705	1117.5	807.5	819.5	836.5	779.5	876.667	811.833	3.75	6.20833	4.1199	4.56546	4.23544	3.59217	4.69274	4.13102	0.282459	0.11982
148564		0.279397	0.211956	91	193.5	112	88.5	83.5	78	25	77.5	18.5	12	14	10	40.3333	12	0.132979	0.430556	0.0943878	0.0668524	0.0708861	0.0460829	0.219307	0.0612738	0.838828	0.217211
148066		0.245828	N/A	70	131	88	75	73	63	6	16.5	-5	-1.5	3	-2.5	5.83333	-0.333333	0.0319149	0.0916667	N/A	N/A	0.0151899	N/A	0.0617908	0.0151899	0.683773	N/A
148294		0.200001	0.00956977	78	124.5	82.5	76	74	73	14.5	11	-7.5	0.5	4	4	6	2.83333	0.0771277	0.0611111	N/A	0.00278552	0.0202532	0.0184332	0.0691194	0.013824	0.163853	0.694648
148119		0.0993077	0.00746781	79.5	126.5	88	73.5	70.5	68.5	14.5	12	-8	-2.5	1	2	6.16667	0.166667	0.0771277	0.0666667	N/A	N/A	0.00506329	0.00921659	0.0718972	0.00713994	0.102884	0.411324
148468		0.68787	0.0169223	736	680	662.5	527.5	514	469	661.5	569	578	451	446	402	602.833	433	3.51862	3.16111	2.94898	2.51253	2.25823	1.85253	3.20957	2.20777	0.0896986	0.150777
148215	hsa-miR-3591-3p	0.657014	0.561896	125.5	274.5	116.5	125.5	128.5	126.5	62	164	19	52	59.5	62.5	81.6667	58	0.329787	0.911111	0.0969388	0.289694	0.301266	0.288018	0.445946	0.292993	0.940319	0.0246204
148570		0.864084	0.225682	95.5	148	117.5	101.5	97	106	37.5	36	30	27	30	38	34.5	31.6667	0.199468	0.2	0.153061	0.150418	0.151899	0.175115	0.184176	0.159144	0.146316	0.0870366
148395		0.053196	N/A	79.5	122	70.5	75	67.5	65.5	16.5	3	5	-1.5	-2.5	0.5	8.16667	-1.16667	0.087766	0.0166667	0.0255102	N/A	N/A	0.00230415	0.0433143	0.00230415	0.89461	N/A
19599		1.87413	0.150062	204.5	142.5	268	231.5	348.5	347.5	141.5	23.5	200	154.5	277.5	282.5	121.667	238.167	0.75266	0.130556	1.02041	0.860724	1.40506	1.30184	0.634541	1.18921	0.719471	0.24312
13132	hsa-miR-519e-5p	1.10205	0.657505	766	727.5	579.5	900.5	561	858.5	702	611	506.5	819.5	491.5	792	606.5	701	3.73404	3.39444	2.58418	4.56546	2.48861	3.64977	3.23756	3.56795	0.182473	0.29172
46491		1.26266	0.495967	87.5	123.5	89	103.5	94.5	85.5	22.5	5	22	21	23	20.5	16.5	21.5	0.119681	0.0277778	0.112245	0.116992	0.116456	0.09447	0.0865678	0.109306	0.589702	0.117569
32711	hsa-miR-633	0.227646	N/A	75.5	120	72.5	85.5	70	61	11.5	1	-1.5	-3	1.5	-6	3.66667	-2.5	0.0611702	0.00555556	N/A	N/A	0.00759494	N/A	0.0333629	0.00759494	1.17872	N/A
42629	hsa-miR-376c-3p	1.40146	0.299607	386	288.5	580	411	664	628.5	322	171.5	506	320	591.5	559	333.167	490.167	1.71277	0.952778	2.58163	1.78273	2.99494	2.57604	1.74906	2.45123	0.465984	0.251165
168734	hsa-miR-4465	N/A	N/A	68	102.5	65.5	88	61	56.5	4.5	-12.5	-10	-6.5	-9.5	-11.5	-6	-9.16667	0.0239362	N/A	N/A	N/A	N/A	N/A	0.0239362	N/A	N/A	N/A
46863	hsa-miR-3157-3p	0.144349	N/A	77	159	79	92	72	63.5	13	43	1.5	-5	3	-3	19.1667	-1.66667	0.0691489	0.238889	0.00765306	N/A	0.0151899	N/A	0.10523	0.0151899	1.13813	N/A
168730	hsa-miR-4464	N/A	N/A	70.5	109	72	91	66.5	61.5	7.5	-5.5	-5	-6.5	-4.5	-6	-1	-5.66667	0.0398936	N/A	N/A	N/A	N/A	N/A	0.0398936	N/A	N/A	N/A
168644	hsa-miR-4775	2.09747	0.0109369	210	196.5	156.5	291	294	301.5	147	82	70	204.5	223.5	233	99.6667	220.333	0.781915	0.455556	0.357143	1.13928	1.13165	1.07373	0.531538	1.11488	0.418307	0.0321489
168770	hsa-miR-4699-3p	0.388953	0.179003	73	131	93	77	76.5	72	9	16	-4.5	-3.5	5.5	5.5	6.83333	2.5	0.0478723	0.0888889	N/A	N/A	0.0278481	0.0253456	0.0683806	0.0265969	0.424142	0.0665312
168890	hsa-miR-1306-5p	0.332514	0.265859	90	158.5	99	86	78.5	78.5	25	44	2.5	7	7	12	23.8333	8.66667	0.132979	0.244444	0.0127551	0.0389972	0.035443	0.0552995	0.130059	0.0432466	0.890918	0.244837
168877	hsa-miR-5583-5p	N/A	N/A	60.5	97.5	81	75.5	57.5	61.5	-2.5	-17.5	-17.5	-4.5	-12	-6	-12.5	-7.5	N/A	N/A	N/A	N/A	N/A	N/A	N/A	N/A	N/A	N/A
168618	hsa-miR-4783-5p	N/A	N/A	67.5	106.5	79	69.5	62.5	57	1.5	-3	-21	-7	-8.5	-13	-7.5	-9.5	0.00797872	N/A	N/A	N/A	N/A	N/A	0.00797872	N/A	N/A	N/A
168855	hsa-miR-4675	N/A	N/A	74	107.5	78.5	72.5	67.5	60.5	4.5	-7	-26	-5	-3	-7.5	-9.5	-5.16667	0.0239362	N/A	N/A	N/A	N/A	N/A	0.0239362	N/A	N/A	N/A
168919	hsa-miR-4456	0.353777	0.374877	6461.5	56019	12363	7778	9556.5	11591	6385.5	55902.5	12252.5	7694	9485.5	11525.5	24846.8	9568.33	33.9654	310.569	62.5128	42.8635	48.0278	53.1129	135.683	48.0014	1.1212	0.106762
168560	hsa-miR-4676-5p	1.35154	0.536707	96.5	120.5	106	97.5	81.5	97	27	7.5	9	19.5	12.5	30.5	14.5	20.8333	0.143617	0.0416667	0.0459184	0.108635	0.0632911	0.140553	0.0770674	0.10416	0.748344	0.372743
168963	hsa-miR-664b-5p	0.162623	0.381222	100.5	692.5	136	88.5	95.5	147	34.5	580.5	35	13.5	28	79.5	216.667	40.3333	0.183511	3.225	0.178571	0.0752089	0.141772	0.366359	1.19569	0.194447	1.4698	0.784561
168671	hsa-miR-3140-5p	N/A	N/A	63	97.5	73	73.5	63.5	61	2	-15.5	-24.5	-3.5	-8	-7.5	-12.6667	-6.33333	0.0106383	N/A	N/A	N/A	N/A	N/A	0.0106383	N/A	N/A	N/A
168745	hsa-miR-4667-3p	0.158935	0.182257	90	246.5	92	85	85.5	83.5	29.5	134	-1.5	11.5	17.5	13.5	54	14.1667	0.156915	0.744444	N/A	0.0640669	0.0886076	0.062212	0.45068	0.0716288	0.921821	0.205689
168668	hsa-miR-4732-3p	0.890762	0.697042	185	348.5	226.5	244.5	206	233	122.5	234	127.5	162.5	137	156	161.333	151.833	0.651596	1.3	0.65051	0.905292	0.693671	0.718894	0.867369	0.772619	0.431962	0.149606
168839	hsa-miR-4774-3p	N/A	N/A	70	109	68.5	70	67	63	7.5	-8.5	-0.5	-7.5	-2.5	-3	-0.5	-4.33333	0.0398936	N/A	N/A	N/A	N/A	N/A	0.0398936	N/A	N/A	N/A
168917	hsa-miR-4511	0.950996	0.902993	128	135	150.5	145	120	117.5	67	15.5	84.5	61.5	50	51	55.6667	54.1667	0.356383	0.0861111	0.431122	0.342618	0.253165	0.235023	0.291206	0.276935	0.62329	0.207998
168661	hsa-miR-4531	0.318087	0.0598611	848.5	1201.5	505.5	309.5	342.5	359.5	786.5	1083	441.5	223.5	272	290.5	770.333	262	4.18351	6.01667	2.25255	1.24513	1.37722	1.33871	4.15091	1.32035	0.45346	0.0514499
168776	hsa-miR-4795-3p	1.03642	0.890288	278	557	340.5	430.5	375	427.5	214	436.5	274.5	348.5	304.5	360.5	308.333	337.833	1.1383	2.425	1.40051	1.9415	1.54177	1.66129	1.6546	1.71486	0.410941	0.119648
168576	hsa-miR-4693-3p	N/A	N/A	70	104.5	70.5	74.5	67.5	61	6	-7.5	1.5	-7	-2	-4	0	-4.33333	0.0319149	N/A	0.00765306	N/A	N/A	N/A	0.019784	N/A	0.867152	N/A
169098	hsa-miR-3691-3p	N/A	N/A	66.5	117.5	69	79.5	61	60	1	1.5	-4	-12	-9	-6	-0.5	-9	0.00531915	0.00833333	N/A	N/A	N/A	N/A	0.00682624	N/A	0.312229	N/A
169107	hsa-miR-4782-5p	0.119498	N/A	79.5	103	75	85.5	68	68	14.5	-16.5	-4	-5	-3.5	2	-2	-2.16667	0.0771277	N/A	N/A	N/A	N/A	0.00921659	0.0771277	0.00921659	N/A	N/A
169272	hsa-miR-4419b	1.09731	0.700512	1651	796	1653	1242.5	1664	1768	1587	679	1578	1138	1591.5	1701	1281.33	1476.83	8.44149	3.77222	8.05102	6.33983	8.05823	7.83871	6.75491	7.41226	0.383492	0.126171
169159	hsa-miR-4521	1.10797	0.659503	211	315.5	243.5	210	260.5	357.5	147.5	200.5	166	131	189.5	293.5	171.333	204.667	0.784574	1.11389	0.846939	0.729805	0.959494	1.35253	0.915134	1.01394	0.191151	0.310584
169023	hsa-miR-4712-3p	0.818467	0.554316	814	367	687	547	570.5	476	750	248.5	612	453.5	502	408.5	536.833	454.667	3.98936	1.38056	3.12245	2.52646	2.54177	1.88249	2.83079	2.31691	0.469351	0.162413
169242		0.209092	N/A	79	114.5	83	85	73	65.5	14	-2.5	-8	1.5	4.5	-2	1.16667	1.33333	0.0744681	N/A	N/A	0.00835655	0.0227848	N/A	0.0744681	0.0155707	N/A	0.655227
169194	hsa-miR-4513	1.04238	0.873747	132	141	137.5	131.5	125	124.5	70	27	49	47	54.5	58	48.6667	53.1667	0.37234	0.15	0.25	0.261838	0.275949	0.267281	0.257447	0.268356	0.432544	0.0265194
169311	hsa-miR-4714-5p	0.959489	0.877982	2552.5	1194	2944.5	1796.5	2523.5	2320	2490	1079	2846.5	1720	2453.5	2254.5	2138.5	2142.67	13.2447	5.99444	14.523	9.58217	12.4228	10.3894	11.254	10.7981	0.408703	0.135556
169156	hsa-miR-4515	N/A	N/A	67.5	105.5	71.5	67.5	64	59.5	2.5	-9	-26.5	-9.5	-2.5	-6	-11	-6	0.0132979	N/A	N/A	N/A	N/A	N/A	0.0132979	N/A	N/A	N/A
169309	hsa-miR-4802-5p	N/A	N/A	73	109.5	77.5	74.5	66	64	9	-2.5	-19	-2	-4	-3.5	-4.16667	-3.16667	0.0478723	N/A	N/A	N/A	N/A	N/A	0.0478723	N/A	N/A	N/A
169126	hsa-miR-4486	1.00147	0.997224	115.5	144.5	117	101.5	105.5	99.5	49	32	8.5	27.5	35	33	29.8333	31.8333	0.260638	0.177778	0.0433673	0.153203	0.177215	0.152074	0.160594	0.160831	0.682775	0.0882951
169083	hsa-miR-371b-3p	1.2932	0.258743	286.5	348	263	361	404	294	224.5	237.5	160.5	280.5	335	228	207.5	281.167	1.19415	1.31944	0.818878	1.56267	1.6962	1.05069	1.11082	1.43652	0.234491	0.237201
169247	hsa-miR-4477a	N/A	N/A	67.5	106.5	77	74.5	67.5	63.5	2.5	-6.5	-28.5	-5.5	-3	-3	-10.8333	-3.83333	0.0132979	N/A	N/A	N/A	N/A	N/A	0.0132979	N/A	N/A	N/A
169297	hsa-miR-4777-3p	N/A	N/A	65.5	113	77.5	76	59	62.5	5	-1.5	-19	-0.5	-10	-5	-5.16667	-5.16667	0.0265957	N/A	N/A	N/A	N/A	N/A	0.0265957	N/A	N/A	N/A
168989	hsa-miR-4447	0.782988	0.46636	128.5	190	124	125	105.5	135.5	68	73.5	31.5	43.5	36	66	57.6667	48.5	0.361702	0.408333	0.160714	0.24234	0.182278	0.304147	0.31025	0.242922	0.424122	0.250848
169092	hsa-miR-548am-3p	N/A	N/A	69	116	78.5	70	65	63	9	6	-21	-3	-3	-6	-2	-4	0.0478723	0.0333333	N/A	N/A	N/A	N/A	0.0406028	N/A	0.2532	N/A
169120	hsa-miR-4787-3p	0.434663	0.269184	111	224.5	122	102.5	104.5	92	51	113	24.5	26.5	36	25	62.8333	29.1667	0.271277	0.627778	0.125	0.147632	0.182278	0.115207	0.341351	0.148373	0.757607	0.226064
169256	hsa-miR-4666a-5p	N/A	N/A	63.5	110	64.5	71	57	60.5	0.5	-5.5	-2	-7.5	-11	-6	-2.33333	-8.16667	0.00265957	N/A	N/A	N/A	N/A	N/A	0.00265957	N/A	N/A	N/A
168998	hsa-miR-4508	0.775594	0.490912	277	179	247	199.5	184.5	198.5	213.5	62.5	174.5	118.5	113	132	150.167	121.167	1.13564	0.347222	0.890306	0.660167	0.572152	0.608295	0.791056	0.613538	0.51004	0.0721084
168982	hsa-miR-4757-3p	N/A	N/A	74	115.5	68.5	78	68.5	64.5	12	-4	2	-8.5	-4	-4.5	3.33333	-5.66667	0.0638298	N/A	0.0102041	N/A	N/A	N/A	0.0370169	N/A	1.02437	N/A
169419	hsa-miR-300	N/A	N/A	68	96.5	65	76	66.5	62.5	4	-21.5	-4	-3.5	-1	-4	-7.16667	-2.83333	0.0212766	N/A	N/A	N/A	N/A	N/A	0.0212766	N/A	N/A	N/A
168596		0.214223	0.194824	101.5	224.5	89	94.5	86	83	38.5	105.5	19	5	17.5	16	54.3333	12.8333	0.204787	0.586111	0.0969388	0.0278552	0.0886076	0.0737327	0.295946	0.0633985	0.868441	0.499495
168662		0.320954	0.378651	81	123	80	86	75.5	72	17	4	-0.5	0	3.5	4	6.83333	2.5	0.0904255	0.0222222	N/A	N/A	0.0177215	0.0184332	0.0563239	0.0180773	0.856245	0.0278371
168617		0.440248	0.450818	96.5	242.5	93.5	110.5	105.5	84	32.5	124	7	26	33.5	17.5	54.5	25.6667	0.172872	0.688889	0.0357143	0.144847	0.16962	0.0806452	0.299159	0.131704	1.15127	0.348664
169153		0.704304	0.481135	687.5	1875	801.5	752	895	889	623.5	1760	699.5	677	823	824	1027.67	774.667	3.31649	9.77778	3.56888	3.77159	4.16709	3.79724	5.55438	3.91197	0.658893	0.0565727
169415	hsa-miR-187-5p	N/A	N/A	65	101	69	82	67	60	1.5	-12	-24.5	-7	-4.5	-6	-11.6667	-5.83333	0.00797872	N/A	N/A	N/A	N/A	N/A	0.00797872	N/A	N/A	N/A
169392		0.745127	0.425061	81	124.5	90	86	79	83.5	17	10	-6	7.5	8.5	17	7	11	0.0904255	0.0555556	N/A	0.0417827	0.043038	0.078341	0.0729905	0.0543872	0.337808	0.381598
168751		0.832901	0.622453	110	127	127.5	101	105	87.5	46	16	30.5	23.5	35.5	21	30.8333	26.6667	0.244681	0.0888889	0.155612	0.130919	0.179747	0.0967742	0.163061	0.135813	0.479347	0.307056
169407	hsa-miR-4301	1.16697	0.724203	12037	2529	19875	10964.5	16227.5	14227.5	11974	2408.5	19775	10881	16157	14160	11385.8	13732.7	63.6915	13.3806	100.893	60.6184	81.8076	65.2535	59.3216	69.2265	0.740362	0.160911
42843	hsa-miR-654-5p	0.783482	0.507699	104.5	148.5	93.5	111	97	119.5	43.5	39.5	22.5	39.5	29.5	16	35.1667	28.3333	0.231383	0.219444	0.114796	0.220056	0.149367	0.0737327	0.188541	0.147719	0.34021	0.495371
46617	hsa-miR-1197	N/A	N/A	70.5	122	68.5	75	68	83.5	4.5	9.5	-0.5	-0.5	0	-32	4.5	-10.8333	0.0239362	0.0527778	N/A	N/A	N/A	N/A	0.038357	N/A	0.531692	N/A
17438		0.466985	N/A	73.5	110	74	84	69	89	10.5	-1	-1	8	1.5	-24.5	2.83333	-5	0.0558511	N/A	N/A	0.0445682	0.00759494	N/A	0.0558511	0.0260816	N/A	1.0024
17626	hsa-miR-575	0.672099	0.571359	71.5	117.5	74	85.5	71.5	97.5	14	14	3.5	10.5	3.5	-10.5	10.5	1.16667	0.0744681	0.0777778	0.0178571	0.0584958	0.0177215	N/A	0.056701	0.0381087	0.594001	0.756568
42926	hsa-miR-92a-1-5p	0.740064	0.672503	73	114.5	84.5	81	73	88	13.5	7.5	2	5.5	6	-11.5	7.66667	0	0.0718085	0.0416667	0.0102041	0.0306407	0.0303797	N/A	0.0412264	0.0305102	0.747205	0.00604714
10928	hsa-miR-125a-5p	0.824605	0.217885	4159.5	5362	4072.5	3804.5	3648.5	4420.5	4099.5	5256.5	3983.5	3728	3579	4325	4446.5	3877.33	21.8059	29.2028	20.324	20.7688	18.1215	19.9309	23.7775	19.6071	0.20004	0.0690068
11154	hsa-miR-517c-3p	0.313484	0.120841	75.5	125.5	94.5	81.5	75.5	84	15	23	-9	3.5	9	-10	9.66667	0.833333	0.0797872	0.127778	N/A	0.0194986	0.0455696	N/A	0.103783	0.0325341	0.326976	0.566636
42953		0.5757	0.0240819	97	143	125.5	94	90.5	120	32	36.5	27	15	22	21.5	31.8333	19.5	0.170213	0.202778	0.137755	0.0835655	0.111392	0.0990783	0.170249	0.0980121	0.190964	0.142269
42746	hsa-miR-647	0.28198	0.199746	112	287.5	123.5	117	104.5	129.5	49.5	181	-3.5	39.5	32.5	33	75.6667	35	0.263298	1.00556	N/A	0.220056	0.164557	0.152074	0.634427	0.178895	0.827291	0.202287
29529	hsa-miR-369-3p	1.19361	0.570681	139	233	185.5	162	200	206.5	80	124	48.5	85	131.5	105.5	84.1667	107.333	0.425532	0.688889	0.247449	0.473538	0.665823	0.486175	0.453957	0.541845	0.489228	0.198495
42782	hcmv-miR-UL148D	0.860428	0.684648	165.5	245.5	179.5	171	177.5	166.5	105	135.5	48.5	87	110	65	96.3333	87.3333	0.558511	0.752778	0.247449	0.48468	0.556962	0.299539	0.519579	0.44706	0.490597	0.296986
11229		1.18619	0.620299	138	157.5	157	154.5	136	141.5	75	51	23.5	69	66.5	50	49.8333	61.8333	0.398936	0.283333	0.119898	0.384401	0.336709	0.230415	0.267389	0.317175	0.524332	0.248537
28251	hsa-miR-770-5p	N/A	N/A	70	114.5	96	77	66.5	81	9	5.5	-39	-1.5	-2	-13	-8.16667	-5.5	0.0478723	0.0305556	N/A	N/A	N/A	N/A	0.0392139	N/A	0.312257	N/A
33902	hsa-miR-128-3p	1.21921	0.713956	106	135	122	107.5	106.5	119	46	26.5	0.5	29	38.5	27	24.3333	31.5	0.244681	0.147222	0.00255102	0.16156	0.194937	0.124424	0.131485	0.160307	0.926569	0.220035
42940	hsa-miR-876-5p	0.399661	0.0111263	76	122	104	85	76.5	76.5	16.5	17.5	0	6	8	-8.5	11.3333	1.83333	0.087766	0.0972222	N/A	0.0334262	0.0405063	N/A	0.0924941	0.0369663	0.0722921	0.135432
42568		0.712587	0.576059	69	119.5	94	85	72	72	11	13	3	7	6	-9.5	9	1.16667	0.0585106	0.0722222	0.0153061	0.0389972	0.0303797	N/A	0.0486797	0.0346885	0.6102	0.175663
46336	hsa-miR-1284	0.213977	0.337764	95.5	391.5	116	104	95.5	112.5	36	281	32	22	29	30.5	116.333	27.1667	0.191489	1.56111	0.163265	0.122563	0.146835	0.140553	0.638622	0.13665	1.25117	0.092193
42791	hsa-miR-548b-5p	0.675203	0.618085	70	114	76	85	71	69.5	9.5	4	-2	7	2	-9	3.83333	0	0.0505319	0.0222222	N/A	0.0389972	0.0101266	N/A	0.0363771	0.0245619	0.550291	0.83115
17445	hsa-miR-610	0.406107	0.369176	68	127	77	85.5	66.5	70	10	19	5	8.5	0.5	-2.5	11.3333	2.16667	0.0531915	0.105556	0.0255102	0.0473538	0.00253165	N/A	0.0614191	0.0249427	0.661879	1.27067
11083	hsa-miR-371a-3p	0.594457	0.415765	72.5	130.5	81.5	86.5	75	72	15.5	26	8.5	11.5	8.5	-1	16.6667	6.33333	0.0824468	0.144444	0.0433673	0.0640669	0.043038	N/A	0.0900862	0.0535524	0.565789	0.277666
32608	hsa-miR-761	0.380849	0.162832	82.5	135	83	84.5	76.5	79.5	10.5	26	12.5	9.5	8.5	1	16.3333	6.33333	0.0558511	0.144444	0.0637755	0.0529248	0.043038	0.00460829	0.0880237	0.0335237	0.556921	0.761394
46615		0.304971	0.0653731	87	131	86	80	74.5	83	23.5	22.5	13	7	5	-28.5	19.6667	-5.5	0.125	0.125	0.0663265	0.0389972	0.0253165	N/A	0.105442	0.0321568	0.321267	0.300831
42947		N/A	N/A	66.5	105	66.5	70	63.5	81.5	6	-2.5	-6.5	-3	-4	-35	-1	-14	0.0319149	N/A	N/A	N/A	N/A	N/A	0.0319149	N/A	N/A	N/A
42615	hsa-miR-135b-3p	0.426691	0.126032	78.5	129.5	88.5	82.5	77.5	93	19.5	23.5	12	6	10	-24.5	18.3333	-2.83333	0.103723	0.130556	0.0612245	0.0334262	0.0506329	N/A	0.0985011	0.0420295	0.354913	0.289487
46818	ebv-miR-BART17-5p	0.145274	0.00181545	76.5	121.5	89	77	72.5	77	17.5	16.5	-2.5	3	2	-29	10.5	-8	0.0930851	0.0916667	N/A	0.0167131	0.0101266	N/A	0.0923759	0.0134198	0.0108577	0.347051
11000		0.137841	0.104491	76.5	137.5	96.5	79	71.5	76.5	16.5	29.5	-9	3.5	3	-26	12.3333	-6.5	0.087766	0.163889	N/A	0.0194986	0.0151899	N/A	0.125827	0.0173442	0.427785	0.175663
46703	hsa-miR-548e-3p	0.479132	0.179809	453	208.5	458.5	208.5	227	236	395	100	341.5	125.5	158.5	131.5	278.833	138.5	2.10106	0.555556	1.74235	0.699164	0.802532	0.605991	1.46632	0.702562	0.551641	0.139937
17415	ebv-miR-BART10-3p	0.17881	0.0595824	90	163	125.5	91.5	80	102.5	28	57	-3.5	12	6	6	27.1667	8	0.148936	0.316667	N/A	0.0668524	0.0303797	0.0276498	0.232801	0.0416273	0.509462	0.525813
46385		0.35504	0.450415	82	150.5	118.5	87	73.5	96.5	21.5	42.5	0.5	10	5.5	-1.5	21.5	4.66667	0.114362	0.236111	0.00255102	0.0557103	0.0278481	N/A	0.117675	0.0417792	0.992697	0.471564
28009		0.573181	0.321586	147.5	164	133	148.5	108	113	88	51.5	-2	68.5	39.5	14.5	45.8333	40.8333	0.468085	0.286111	N/A	0.381616	0.2	0.0668203	0.377098	0.216145	0.341224	0.731071
17315	kshv-miR-K12-3-3p	0.540626	0.0551013	83.5	143	102.5	96	83.5	90.5	25	28.5	-24.5	16	13.5	-6.5	9.66667	7.66667	0.132979	0.158333	N/A	0.0891365	0.0683544	N/A	0.145656	0.0787455	0.123087	0.186616
17273		0.428065	0.316284	104.5	177	129	109	89.5	100.5	44.5	67.5	6	27	20.5	4.5	39.3333	17.3333	0.236702	0.375	0.0306122	0.150418	0.103797	0.0207373	0.214105	0.0916509	0.809428	0.71672
42687		0.285891	0.338204	178.5	779.5	199	165.5	161.5	193.5	120.5	674	92.5	85	92	97.5	295.667	91.5	0.640957	3.74444	0.471939	0.473538	0.465823	0.449309	1.61911	0.46289	1.13799	0.0267404
42850	hsa-miR-150-3p	0.163046	0.0545911	71	125.5	73	83	71	75.5	13.5	19.5	-7	3	2.5	-17	8.66667	-3.83333	0.0718085	0.108333	N/A	0.0167131	0.0126582	N/A	0.0900709	0.0146857	0.28674	0.19524
46300	hiv1-miR-TAR-3p	1.20309	0.797835	88.5	125	82.5	107	80.5	81.5	28	18	3	28.5	10.5	-11	16.3333	9.33333	0.148936	0.1	0.0153061	0.158774	0.0531646	N/A	0.0880808	0.105969	0.767565	0.704707
46243		0.574721	0.255108	80.5	131	83.5	91.5	79	81	22.5	24.5	11	11	11.5	-10.5	19.3333	4	0.119681	0.136111	0.0561224	0.0612813	0.0582278	N/A	0.103971	0.0597546	0.406313	0.0361335
46724		0.614542	0.554731	69	121	72	80.5	72	71	9.5	14	1.5	5	5.5	-11.5	8.33333	-0.333333	0.0505319	0.0777778	0.00765306	0.0278552	0.0278481	N/A	0.0453209	0.0278516	0.780028	0.000179037
31038	hiv1-miR-N367	0.430854	0.0342144	79	131	88	87	75	84.5	18.5	22	14.5	11.5	6.5	6.5	18.3333	8.16667	0.0984043	0.122222	0.0739796	0.0640669	0.0329114	0.0299539	0.098202	0.0423107	0.245636	0.446679
46450	hsa-miR-548o-3p	0.360336	0.0546978	77	124.5	91.5	86	70.5	72	19	13	15	8.5	2.5	-6	15.6667	1.66667	0.101064	0.0722222	0.0765306	0.0473538	0.0126582	N/A	0.0832722	0.030006	0.186831	0.817618
46695	hsa-miR-1228-3p	0.510872	0.0209895	100	158.5	116.5	105	93.5	100.5	42.5	52.5	37	23	25.5	22.5	44	23.6667	0.226064	0.291667	0.188776	0.128134	0.129114	0.103687	0.235502	0.120311	0.221191	0.119738
17624	hsa-miR-532-5p	1.02324	0.840955	108.5	141	123	124	113.5	134.5	50.5	36.5	42	46	47	45	43	46	0.268617	0.202778	0.214286	0.256267	0.237975	0.207373	0.22856	0.233872	0.153851	0.10563
11142		0.480722	0.0600252	219	336	202.5	163.5	154.5	154.5	142	220.5	130	82	87.5	80.5	164.167	83.3333	0.755319	1.225	0.663265	0.456825	0.443038	0.370968	0.881195	0.42361	0.3419	0.108845
42666	hsa-miR-26a-2-3p	0.777469	0.393949	114.5	153.5	119.5	107.5	118.5	104	49.5	43	40	36	52	18.5	44.1667	35.5	0.263298	0.238889	0.204082	0.200557	0.263291	0.0852535	0.235423	0.183034	0.12641	0.493368
42684		0.335787	0.0776477	75	120	83.5	78.5	69.5	76.5	10	13.5	-6	5	3	-28.5	5.83333	-6.83333	0.0531915	0.075	N/A	0.0278552	0.0151899	N/A	0.0640957	0.0215225	0.240592	0.416109
42581	hsa-miR-513a-5p	0.586381	0.456167	158	536	226.5	186.5	210.5	288	98	430.5	133	110	142	168	220.5	140	0.521277	2.39167	0.678571	0.612813	0.718987	0.774194	1.19717	0.701998	0.866583	0.116839
46223	hsa-miR-1306-3p	0.484679	0.091483	83.5	132	103	87.5	79	90	19	24.5	-4.5	12	9.5	-15.5	13	2	0.101064	0.136111	N/A	0.0668524	0.0481013	N/A	0.118587	0.0574768	0.208978	0.230685
17299	hcmv-miR-UL22A-3p	0.376964	0.082554	83	133.5	103.5	88	77	84	24.5	29.5	-12	14	6.5	-16.5	14	1.33333	0.130319	0.163889	N/A	0.0779944	0.0329114	N/A	0.147104	0.0554529	0.161365	0.574876
46347		0.359911	0.251039	76.5	138	96	90	77	88	14	27.5	-22.5	11.5	3.5	-9	6.33333	2	0.0744681	0.152778	N/A	0.0640669	0.0177215	N/A	0.113623	0.0408942	0.487343	0.801363
19585	hsa-miR-148b-3p	0.835409	0.592148	274.5	551.5	357.5	312.5	374.5	355.5	213	445	233	231	307	252.5	297	263.5	1.13298	2.47222	1.18878	1.28691	1.55443	1.16359	1.59799	1.33498	0.474107	0.149668
46485		0.26409	0.394059	117.5	529	144	139	116.5	137	58.5	420	23	59.5	44	38	167.167	47.1667	0.31117	2.33333	0.117347	0.331476	0.222785	0.175115	0.920617	0.243125	1.33311	0.329626
14272	hsa-miR-542-3p	0.645826	0.398704	618.5	1792.5	848.5	651.5	735	955.5	560.5	1682.5	738	573.5	665	831.5	993.667	690	2.98138	9.34722	3.76531	3.19499	3.36709	3.8318	5.36464	3.46462	0.647056	0.0950808
42651		0.300017	0.113712	67	120.5	89.5	81.5	73.5	79.5	8	13	-12	3	3.5	-20	3	-4.5	0.0425532	0.0722222	N/A	0.0167131	0.0177215	N/A	0.0573877	0.0172173	0.365569	0.0414156
11235		0.681297	0.0307723	671.5	710	635	548.5	472	482	613	599	548.5	469	403	378	586.833	416.667	3.26064	3.32778	2.79847	2.61281	2.04051	1.74194	3.12896	2.13175	0.0920998	0.2076
42772	hsa-miR-566	N/A	N/A	69.5	112	72.5	74.5	67	75.5	10	4	3	-3.5	-4.5	-22.5	5.66667	-10.1667	0.0531915	0.0222222	0.0153061	N/A	N/A	N/A	0.0302399	N/A	0.66717	N/A
46326	hsa-miR-1233-3p	0.434331	0.123466	81	138.5	92	94.5	77.5	84.5	20	29.5	18.5	13.5	6	-13.5	22.6667	2	0.106383	0.163889	0.0943878	0.0752089	0.0303797	N/A	0.121553	0.0527943	0.305636	0.600424
42773	ebv-miR-BART17-3p	0.455334	0.354017	90.5	169.5	91	95	84.5	88.5	30.5	60	16	16	17	-13.5	35.5	6.5	0.162234	0.333333	0.0816327	0.0891365	0.0860759	N/A	0.1924	0.0876062	0.668052	0.0247029
27541	hcmv-miR-UL70-3p	0.983412	0.95426	85.5	142.5	91.5	104.5	91.5	96.5	26	31	16.5	26	22.5	-3.5	24.5	15	0.138298	0.172222	0.0841837	0.144847	0.113924	N/A	0.131568	0.129385	0.337494	0.168996
10964	hsa-miR-155-5p	0.735908	0.492546	224	559	283	296.5	307	291	163.5	451	217	219	238.5	189	277.167	215.5	0.869681	2.50556	1.10714	1.22006	1.20759	0.870968	1.49413	1.09954	0.591606	0.180118
17332	ebv-miR-BART9-3p	0.464245	0.182268	81.5	140.5	84.5	88	82	95.5	22.5	35	17	10	13.5	-11.5	24.8333	4	0.119681	0.194444	0.0867347	0.0557103	0.0683544	N/A	0.13362	0.0620324	0.413046	0.14413
42507	hsa-miR-202-5p	0.635493	0.509351	78.5	117	78	90	75.5	82.5	20.5	14	4.5	10.5	6	-14	13	0.833333	0.109043	0.0777778	0.0229592	0.0584958	0.0303797	N/A	0.0699265	0.0444378	0.62316	0.447391
19011	SNORD10	0.75702	0.229805	4625	7864	6125	4933.5	4827	5140	4567	7755.5	6057	4855.5	4757	5048.5	6126.5	4887	24.2926	43.0861	30.9031	27.0501	24.0861	23.265	32.7606	24.8004	0.291005	0.0802858
146057		0.476416	0.254707	93	160.5	87.5	104	87	89.5	36	51	13.5	26	18	5	33.5	16.3333	0.191489	0.283333	0.0688776	0.144847	0.0911392	0.0230415	0.181233	0.0863425	0.593683	0.707
26160	spike_control_v2_21	0.69013	0.06534	3401	2297.5	3266	2164.5	2306	1983.5	3324.5	2184.5	3194.5	2091.5	2239.5	1917.5	2901.17	2082.83	17.6835	12.1361	16.2985	11.6518	11.3392	8.83641	15.3727	10.6092	0.187817	0.145457
24127	spike_control_v2_11	0.613475	0.193983	1163	2009	1064	899	1018	869.5	1086.5	1901.5	986	826	950	803	1324.67	859.667	5.77926	10.5639	5.03061	4.60167	4.81013	3.70046	7.12459	4.37075	0.421351	0.134936
146219		0.236565	0.355575	113.5	611.5	151	113	126.5	157.5	54.5	495.5	61	38.5	57	63	203.667	52.8333	0.289894	2.75278	0.311224	0.214485	0.288608	0.290323	1.11797	0.264472	1.26643	0.163717
17848		0.73701	0.107677	1434	1961.5	1524	1214.5	1150	1496.5	1375.5	1851.5	1414.5	1141.5	1083	1399.5	1547.17	1208	7.31649	10.2861	7.21684	6.35933	5.48354	6.44931	8.27315	6.09739	0.210801	0.0874981
42492		0.641777	0.54886	98	156	123	93	89	92	32.5	47	7.5	19	19	-9	29	9.66667	0.172872	0.261111	0.0382653	0.10585	0.0962025	N/A	0.157416	0.101026	0.712913	0.0675221
146006	hsa-miR-670-5p	0.357796	0.131844	87.5	148	112.5	89	78.5	90.5	25	39.5	-15	14	9.5	-11.5	16.5	4	0.132979	0.219444	N/A	0.0779944	0.0481013	N/A	0.176212	0.0630478	0.346972	0.335264
146198		0.130732	0.34715	225	2303	279.5	187	196	234	165.5	2193.5	160	106.5	127.5	125	839.667	119.667	0.880319	12.1861	0.816327	0.593315	0.64557	0.576037	4.62759	0.604974	1.41455	0.0598421
146078		0.333855	0.0503991	79.5	126.5	108	84.5	81	83.5	20.5	14.5	-8	5	7	-10.5	9	0.5	0.109043	0.0805556	N/A	0.0278552	0.035443	N/A	0.0947991	0.0316491	0.212485	0.169529
146166		0.104989	N/A	73.5	115.5	89	76	71.5	75	15	3	-33.5	-3	1	-24	-5.16667	-8.66667	0.0797872	0.0166667	N/A	N/A	0.00506329	N/A	0.048227	0.00506329	0.925478	N/A
146164		0.447031	0.0139683	141	194	171	113	113.5	132	81	84	61.5	34.5	43.5	28	75.5	35.3333	0.430851	0.466667	0.313776	0.192201	0.220253	0.129032	0.403764	0.180495	0.198045	0.258862
17748		0.818096	0.596737	12376.5	30842.5	15369.5	15449.5	16883	18799.5	12317	30736	15284.5	15373	16811	18733	19445.8	16972.3	65.516	170.756	77.9821	85.6435	85.119	86.3272	104.751	85.6965	0.548922	0.00706969
146089	hsv1-miR-H8-5p	0.544495	0.181484	96	158.5	99	107.5	91.5	112	35.5	51	23.5	26.5	24.5	11	36.6667	20.6667	0.18883	0.283333	0.119898	0.147632	0.124051	0.0506912	0.197354	0.107458	0.415753	0.470469
13421	spike_control_v2_9	0.57925	0.0152329	17928	21348	18426.5	12882.5	11796	10295	17869.5	21242	18358	12803	11726	10193	19156.5	11574	95.0505	118.011	93.6633	71.3259	59.3722	46.9724	102.242	59.2235	0.133746	0.205619
146144		0.447371	0.217393	82	137	85.5	83	80	88.5	21.5	31.5	13.5	6	14.5	-15	22.1667	1.83333	0.114362	0.175	0.0688776	0.0334262	0.0734177	N/A	0.119413	0.053422	0.445858	0.529338
146154		0.512635	0.201661	88.5	151.5	93.5	92	84	97.5	31	42.5	20	14.5	18	-8.5	31.1667	8	0.164894	0.236111	0.102041	0.0807799	0.0911392	N/A	0.167682	0.0859596	0.400035	0.085216
13388	spike_control_v2_5	0.677785	0.48494	150.5	144.5	160	163	111	119	90.5	36.5	72.5	82.5	43.5	7.5	66.5	44.5	0.481383	0.202778	0.369898	0.45961	0.220253	0.0345622	0.351353	0.238142	0.399101	0.894794
146071		0.899027	0.711083	137	203	136	158.5	163.5	161	78.5	93.5	59.5	77.5	94.5	44.5	77.1667	72.1667	0.417553	0.519444	0.303571	0.431755	0.478481	0.205069	0.413523	0.371768	0.261153	0.393374
145844	hsa-miR-374a-5p	1.17274	0.588782	426.5	285.5	630	456.5	591.5	582	369	179.5	563.5	379.5	523	451.5	370.667	451.333	1.96277	0.997222	2.875	2.11421	2.6481	2.08065	1.945	2.28098	0.482785	0.139578
145725		0.264338	0.116811	122.5	263	133	118.5	97.5	113	63.5	153.5	62.5	41.5	29.5	4	93.1667	25	0.337766	0.852778	0.318878	0.231198	0.149367	0.0184332	0.50314	0.132999	0.602102	0.80694
145859	hsa-miR-33a-5p	0.255662	0.196221	93	216	112.5	93.5	95	113	32.5	111	32	16	25.5	5.5	58.5	15.6667	0.172872	0.616667	0.163265	0.0891365	0.129114	0.0253456	0.317601	0.0811987	0.815622	0.644562
105441	hsa-miR-518c-3p	N/A	N/A	69.5	110	78.5	69	65	63	1.5	2.5	-8	-5.5	-4	-12	-1.33333	-7.16667	0.00797872	0.0138889	N/A	N/A	N/A	N/A	0.0109338	N/A	0.38222	N/A
145827	hsa-miR-200a-5p	0.265149	0.0501972	84	128	92	79	74.5	72.5	16.5	21.5	-8.5	3.5	7	-4	9.83333	2.16667	0.087766	0.119444	N/A	0.0194986	0.035443	N/A	0.103605	0.0274708	0.216206	0.410414
145950	hsa-miR-33b-5p	0.156372	0.135158	75	132.5	86.5	77	73.5	79	14.5	27.5	-7	1	6	-6.5	11.6667	0.166667	0.0771277	0.152778	N/A	0.00557103	0.0303797	N/A	0.114953	0.0179754	0.465345	0.975913
145732	hsa-miR-346	0.684417	0.372946	77.5	129.5	102.5	86	83.5	84.5	13.5	22.5	-5	11	14.5	-4	10.3333	7.16667	0.0718085	0.125	N/A	0.0612813	0.0734177	N/A	0.0984043	0.0673495	0.38222	0.127421
145821	hsa-miR-518c-5p	0.451231	0.101035	84	130	97	82.5	81.5	86	25.5	17.5	-19	7.5	12.5	-9	8	3.66667	0.135638	0.0972222	N/A	0.0417827	0.0632911	N/A	0.11643	0.0525369	0.233309	0.289487
145889	hsa-miR-196b-5p	0.436707	0.0461231	77	123.5	101.5	82.5	79.5	82.5	18	19.5	-18.5	6	11	-11	6.33333	2	0.0957447	0.108333	N/A	0.0334262	0.0556962	N/A	0.102039	0.0445612	0.0872365	0.353386
145832		0.71279	0.177738	246.5	330	243	186.5	219	233.5	186	222	131.5	114	154.5	140	179.833	136.167	0.989362	1.23333	0.670918	0.635097	0.782278	0.645161	0.964538	0.687512	0.292397	0.119596
147794	kshv-miR-K12-8-3p	0.599016	0.422112	140	218.5	128	125.5	112.5	126	80	109.5	11.5	47	42.5	38.5	67	42.6667	0.425532	0.608333	0.0586735	0.261838	0.21519	0.177419	0.36418	0.218149	0.768629	0.193846
147863	hsa-miR-3155a	0.394019	N/A	73	126.5	99	76.5	75.5	82.5	14.5	18.5	-12	-0.5	7	-18.5	7	-4	0.0771277	0.102778	N/A	N/A	0.035443	N/A	0.0899527	0.035443	0.201632	N/A
147793	hsa-miR-4252	0.276556	0.284003	79	165	87	92	78	100	20.5	57.5	-6	14	8	-1	24	7	0.109043	0.319444	N/A	0.0779944	0.0405063	N/A	0.214243	0.0592504	0.694428	0.447391
147508		0.799103	0.329254	88	125.5	96.5	91.5	94	97.5	31	19.5	26	17	24	-8	25.5	11	0.164894	0.108333	0.132653	0.0947075	0.121519	N/A	0.135293	0.108113	0.20971	0.175358
147829		0.671896	0.600896	176	585.5	165	264.5	237	237.5	117.5	477.5	87.5	186	168.5	133	227.5	162.5	0.625	2.65278	0.446429	1.03621	0.853165	0.612903	1.2414	0.834093	0.987226	0.254525
147801	hsv1-miR-H11/hsv2-miR-H11-3p	0.146099	0.163202	70.5	113.5	75.5	79.5	70.5	83.5	12	4.5	4.5	1.5	0.5	-22	7	-6.66667	0.0638298	0.025	0.0229592	0.00835655	0.00253165	N/A	0.037263	0.0054441	0.618043	0.756568
147554	hsa-miR-4273	0.700746	0.561241	83.5	137.5	83	88.5	89	102.5	24.5	26.5	7	9	19	-12	19.3333	5.33333	0.130319	0.147222	0.0357143	0.0501393	0.0962025	N/A	0.104419	0.0731709	0.575538	0.445145
147826	hsa-miR-3153	0.176326	0.0828656	73	133	76.5	80	72.5	86	15	21.5	9.5	2.5	3	-18	15.3333	-4.16667	0.0797872	0.119444	0.0484694	0.0139276	0.0151899	N/A	0.082567	0.0145587	0.430791	0.0613088
147803	hsv2-miR-H10	0.939474	0.878856	346	167.5	393.5	301.5	296	292	287	58.5	323	222	228.5	194	222.833	214.833	1.5266	0.325	1.64796	1.23677	1.15696	0.894009	1.16652	1.09591	0.626907	0.163653
147537	hsa-miR-4264	0.406253	0.427504	70.5	135.5	78	83.5	73.5	89	11.5	30	5	5.5	7.5	-25.5	15.5	-4.16667	0.0611702	0.166667	0.0255102	0.0306407	0.0379747	N/A	0.084449	0.0343077	0.869176	0.15116
147859		0.356741	0.287466	143.5	396	139.5	156.5	134	136	85.5	288	64	76	65.5	20.5	145.833	54	0.454787	1.6	0.326531	0.423398	0.331646	0.09447	0.793773	0.283171	0.883316	0.599416
147795	hsa-miR-3186-3p	0.727848	0.678624	95	186	88.5	119	91	109	37	78	16	42	22	-8.5	43.6667	18.5	0.196809	0.433333	0.0816327	0.233983	0.111392	N/A	0.237258	0.172688	0.75574	0.501974
147673	hsa-miR-4262	0.958566	0.778344	126	182	145	134	156.5	183	69	75.5	65	54.5	88	70	69.8333	70.8333	0.367021	0.419444	0.331633	0.303621	0.44557	0.322581	0.372699	0.357257	0.118542	0.215716
147884	hsv2-miR-H25	1.03196	0.921227	640.5	377.5	417	612	483	444	582.5	271	350	533	415.5	330	401.167	426.167	3.0984	1.50556	1.78571	2.96936	2.1038	1.52074	2.12989	2.19796	0.399257	0.331619
147929	hsa-miR-1273c	0.886995	0.861071	78.5	153.5	95.5	99.5	90.5	88.5	15.5	46.5	4	22.5	23.5	16.5	22	20.8333	0.0824468	0.258333	0.0204082	0.125348	0.118987	0.0760369	0.120396	0.106791	1.02511	0.251172
147834		0.436453	0.386552	97	197.5	109	97.5	90	92	33	90.5	7.5	22	23	16	43.6667	20.3333	0.175532	0.502778	0.0382653	0.122563	0.116456	0.0737327	0.238858	0.10425	0.9991	0.255202
148239	hsa-miR-3916	0.254851	0.170547	71.5	115	81.5	74.5	68.5	74	12	5.5	-17	2.5	2	-9.5	0.166667	-1.66667	0.0638298	0.0305556	N/A	0.0139276	0.0101266	N/A	0.0471927	0.0120271	0.498561	0.223471
148691	hsa-miR-602	0.2565	N/A	70.5	114	84	71.5	69	75.5	8	3	-20.5	-1.5	1.5	-8.5	-3.16667	-2.83333	0.0425532	0.0166667	N/A	N/A	0.00759494	N/A	0.0296099	0.00759494	0.618189	N/A
147376	hsa-miR-3679-5p	0.516059	0.206712	78.5	141	106.5	87	81	84	19	31	-7.5	13.5	13	-2.5	14.1667	8	0.101064	0.172222	N/A	0.0752089	0.0658228	N/A	0.136643	0.0705158	0.368234	0.0941206
147572	hsa-miR-3120-3p	0.554953	N/A	66.5	116.5	87	71	70.5	76	8.5	5	-21	-3	4	-15	-2.5	-4.66667	0.0452128	0.0277778	N/A	N/A	0.0202532	N/A	0.0364953	0.0202532	0.337808	N/A
148398	hsa-miR-3908	0.0853296	N/A	69	112.5	93.5	75.5	68	75	7.5	3.5	-24.5	0	0.5	-17.5	-4.5	-5.66667	0.0398936	0.0194444	N/A	N/A	0.00253165	N/A	0.029669	0.00253165	0.487368	N/A
148241	hsa-miR-3649	0.35292	0.241754	80.5	179	112	101.5	88	104	20	71	-3.5	23	17.5	10.5	29.1667	17	0.106383	0.394444	N/A	0.128134	0.0886076	0.0483871	0.250414	0.0883761	0.813415	0.451183
148147	hsa-miR-181b-3p	0.877316	0.0505185	78.5	125.5	108.5	88.5	87.5	89.5	18	17	-2.5	14.5	17	-4	10.8333	9.16667	0.0957447	0.0944444	N/A	0.0807799	0.0860759	N/A	0.0950946	0.0834279	0.00966833	0.0448871
148616		0.939936	0.423285	65535	65535	65535	65318.5	65535	62579	65476	65425	65448.5	65242.5	65466	62479	65449.8	64395.8	348.277	363.472	333.921	363.468	331.473	287.922	348.557	327.621	0.0423967	0.115744
148289	hsa-miR-3675-5p	0.367818	0.0036222	73	124.5	77	82.5	75.5	78.5	15	15.5	0	5.5	6	-17.5	10.1667	-2	0.0797872	0.0861111	N/A	0.0306407	0.0303797	N/A	0.0829492	0.0305102	0.0539084	0.00604714
147964		0.654012	0.550592	80	140	93	98	74.5	84.5	19.5	31.5	9	19.5	6.5	-14.5	20	3.83333	0.103723	0.175	0.0459184	0.108635	0.0329114	N/A	0.108214	0.0707732	0.5975	0.756568
148489	hsa-miR-3674	N/A	N/A	70	111.5	78.5	75	62.5	76.5	10.5	5	1.5	-2	-6	-21.5	5.66667	-9.83333	0.0558511	0.0277778	0.00765306	N/A	N/A	N/A	0.0304273	N/A	0.795601	N/A
148038	hsa-miR-3679-3p	0.673201	0.185397	276.5	473	329.5	281	263.5	287	219	368	230	197	193.5	189.5	272.333	193.333	1.16489	2.04444	1.17347	1.09749	0.979747	0.873272	1.46094	0.983504	0.345909	0.114039
148637	hsa-miR-198	0.414061	0.167317	77.5	133.5	81.5	86	74	93	19.5	23	10	9	5.5	-16	17.5	-0.5	0.103723	0.127778	0.0510204	0.0501393	0.0278481	N/A	0.0941739	0.0389937	0.416885	0.404225
148388	hsa-miR-3677-3p	0.572472	0.505909	70.5	117	76.5	81	72	86	11	11	1	4	5	-25.5	7.66667	-5.5	0.0585106	0.0611111	0.00510204	0.0222841	0.0253165	N/A	0.0415746	0.0238003	0.76039	0.0900906
147602	hsa-miR-2682-5p	0.738053	N/A	70	112.5	72.5	72.5	73.5	85	10.5	6	-4.5	-3	6.5	-23	4	-6.5	0.0558511	0.0333333	N/A	N/A	0.0329114	N/A	0.0445922	0.0329114	0.357068	N/A
148534		0.360467	0.405915	94	227	100.5	96	94	110.5	37	122	26	18	28	0	61.6667	15.3333	0.196809	0.677778	0.132653	0.100279	0.141772	N/A	0.335746	0.121025	0.887395	0.242432
148143		0.347179	0.445841	87.5	217.5	92.5	104	82.5	111	29	113.5	19	23	15	0	53.8333	12.6667	0.154255	0.630556	0.0969388	0.128134	0.0759494	N/A	0.293917	0.102042	0.996688	0.361616
148381		0.709874	N/A	69	115.5	73	84	69	84	10.5	10.5	3	5.5	0	-24.5	8	-6.33333	0.0558511	0.0583333	0.0153061	0.0306407	N/A	N/A	0.0431635	0.0306407	0.559665	N/A
148602		0.208846	0.215144	67.5	101.5	71.5	80	69	79.5	10.5	-5.5	4.5	2.5	0.5	-29	3.16667	-8.66667	0.0558511	N/A	0.0229592	0.0139276	0.00253165	N/A	0.0394051	0.00822961	0.59023	0.979164
148047		0.729747	0.141844	93	139	100.5	101.5	95.5	91	31.5	31	-1.5	27	26	19.5	20.3333	24.1667	0.167553	0.172222	N/A	0.150418	0.131646	0.0898618	0.169888	0.123975	0.0194334	0.250036
148291		0.232348	0.19154	76.5	142	101	84	76.5	72.5	15.5	34	-2.5	4.5	7.5	-0.5	15.6667	3.83333	0.0824468	0.188889	N/A	0.0250696	0.0379747	N/A	0.135668	0.0315222	0.554781	0.289487
148146		0.495393	0.365495	87.5	160.5	102	89.5	88	91.5	27	50	5	13	18.5	12	27.3333	14.5	0.143617	0.277778	0.0255102	0.0724234	0.0936709	0.0552995	0.148968	0.0737979	0.847287	0.260476
148631		0.635211	0.513011	91.5	155.5	105	96	86.5	95	31.5	44	2	19.5	21.5	11	25.8333	17.3333	0.167553	0.244444	0.0102041	0.108635	0.108861	0.0506912	0.140734	0.0893957	0.848417	0.374954
148286		0.992169	0.990866	133	337.5	122	152	182.5	233	73	228.5	12	77.5	115.5	149.5	104.5	114.167	0.388298	1.26944	0.0612245	0.431755	0.58481	0.68894	0.572989	0.568502	1.09064	0.227556
148542		0.133305	N/A	69.5	120.5	93.5	74.5	69.5	73.5	11.5	9.5	-23.5	0	1.5	-14.5	-0.833333	-4.33333	0.0611702	0.0527778	N/A	N/A	0.00759494	N/A	0.056974	0.00759494	0.104159	N/A
148556		0.273604	0.200075	70.5	117	98.5	77.5	74	79	12	5.5	-12	1	4	-9	1.83333	-1.33333	0.0638298	0.0305556	N/A	0.00557103	0.0202532	N/A	0.0471927	0.0129121	0.498561	0.804039
148252		0.320509	0.3337	74	151.5	93	81	84.5	79.5	15	45.5	-10	5.5	15	-13	16.8333	2.5	0.0797872	0.252778	N/A	0.0306407	0.0759494	N/A	0.166283	0.053295	0.735632	0.601146
148463		0.331613	0.148253	76.5	142	94	83	75	97.5	18.5	35	10.5	10	8.5	3.5	21.3333	7.33333	0.0984043	0.194444	0.0535714	0.0557103	0.043038	0.016129	0.115473	0.0382924	0.623269	0.527855
148529		0.315239	0.332139	71.5	129	81	77	72.5	83	10	24	5	3	5.5	-18	13	-3.16667	0.0531915	0.133333	0.0255102	0.0167131	0.0278481	N/A	0.0706783	0.0222806	0.792297	0.353386
148462		0.448835	0.0959085	82	132.5	82	82.5	80	85.5	21	24	14	7	11	-16	19.6667	0.666667	0.111702	0.133333	0.0714286	0.0389972	0.0556962	N/A	0.105488	0.0473467	0.297823	0.249394
148304		0.364292	0.0896556	88	146.5	94	89	79.5	87	27.5	40	23	13	9	-12.5	30.1667	3.16667	0.146277	0.222222	0.117347	0.0724234	0.0455696	N/A	0.161949	0.0589965	0.334462	0.321858
148501		0.955262	0.898919	144	158.5	126	156	132	134	84.5	49	46.5	79.5	62.5	34	60	58.6667	0.449468	0.272222	0.237245	0.442897	0.316456	0.156682	0.319645	0.305345	0.355964	0.469733
148614		1.47818	0.0813003	438	419.5	336.5	618.5	568.5	541.5	379.5	313	266.5	544	499	435.5	319.667	492.833	2.01862	1.73889	1.35969	3.03064	2.52658	2.00691	1.70573	2.52138	0.193882	0.203017
148073		0.762982	0.132968	72.5	120.5	87	87	81	82	14.5	12	16.5	9	13	-18	14.3333	1.33333	0.0771277	0.0666667	0.0841837	0.0501393	0.0658228	N/A	0.0759927	0.057981	0.115978	0.191268
148563		0.467611	N/A	61.5	96	67.5	77	63	75.5	4	-11	0.5	1	-7.5	-31	-2.16667	-12.5	0.0212766	N/A	0.00255102	0.00557103	N/A	N/A	0.0119138	0.00557103	1.1114	N/A
148114		0.560114	0.288144	133	207.5	106	136	115.5	127.5	74	98.5	36.5	61.5	47	11	69.6667	39.8333	0.393617	0.547222	0.186224	0.342618	0.237975	0.0506912	0.375688	0.210428	0.482223	0.702854
148521		0.790091	0.483194	79.5	137.5	95.5	95	87	98	19	30	18	19	16.5	-16.5	22.3333	6.33333	0.101064	0.166667	0.0918367	0.10585	0.0835443	N/A	0.119856	0.0946969	0.340419	0.166555
148436		0.856528	0.728278	97	128.5	95.5	98	91.5	108.5	37	18.5	15.5	17	24	-6	23.6667	11.6667	0.196809	0.102778	0.0790816	0.0947075	0.121519	N/A	0.126223	0.108113	0.493309	0.175358
148460		0.452828	0.158794	89	149.5	93	96	82.5	101.5	31.5	44	21.5	16	13.5	-14	32.3333	5.16667	0.167553	0.244444	0.109694	0.0891365	0.0683544	N/A	0.173897	0.0787455	0.388729	0.186616
148507		1.9621	0.379641	1063	529.5	212.5	1931.5	782	753.5	1006.5	425.5	146	1848.5	713.5	584.5	526	1048.83	5.35372	2.36389	0.744898	10.2981	3.61266	2.69355	2.82084	5.53475	0.828883	0.749926
148099		0.23846	0.360783	152.5	1069	188	175	164.5	227	96	963.5	121.5	96	95.5	114.5	393.667	102	0.510638	5.35278	0.619898	0.534819	0.483544	0.52765	2.1611	0.515338	1.27926	0.0538797
148200		1.09997	0.72321	472	295	586	464	556.5	417.5	411	188	484.5	390.5	487	354	361.167	410.5	2.18617	1.04444	2.47194	2.17549	2.46582	1.63134	1.90085	2.09088	0.397353	0.202607
146158	hsa-miR-3202	0.613058	0.358975	449	207.5	306.5	206	241	208	390	96	208.5	130.5	174	139.5	231.5	148	2.07447	0.533333	1.06378	0.727019	0.881013	0.642857	1.22386	0.750296	0.63973	0.160966
42461		0.582007	0.476827	97.5	237.5	128.5	110	107	119	35.5	125	25	35	39	42.5	61.8333	38.8333	0.18883	0.694444	0.127551	0.194986	0.197468	0.195853	0.336942	0.196102	0.923361	0.00642446
11155	hsa-miR-518a-3p	0.144959	N/A	67	112.5	86	72.5	66	72	5	1.5	-20.5	-1	0.5	-7	-4.66667	-2.5	0.0265957	0.00833333	N/A	N/A	0.00253165	N/A	0.0174645	0.00253165	0.739411	N/A
46974		N/A	N/A	65	110.5	86.5	71.5	66	72	6	1	-19.5	-2	-1	-7.5	-4.16667	-3.5	0.0319149	0.00555556	N/A	N/A	N/A	N/A	0.0187352	N/A	0.994857	N/A
42755	hcmv-miR-US33-3p	0.496787	0.122763	72	117.5	86	82.5	71.5	78	12.5	9.5	-16	7	4	-4	2	2.33333	0.0664894	0.0527778	N/A	0.0389972	0.0202532	N/A	0.0596336	0.0296252	0.162586	0.447391
46610		0.290285	0.0203561	73.5	121	91.5	80.5	73	72.5	14	12.5	-11	2.5	5.5	-12	5.16667	-1.33333	0.0744681	0.0694444	N/A	0.0139276	0.0278481	N/A	0.0719563	0.0208878	0.0493668	0.471245
168579	hsa-miR-5706	0.283603	N/A	69	101	80.5	77	73.5	72.5	12	-4	-1.5	1.5	5.5	-19	2.16667	-4	0.0638298	N/A	N/A	0.00835655	0.0278481	N/A	0.0638298	0.0181023	N/A	0.761372
168690	hsa-miR-4466	0.762191	0.579669	93	122	91.5	90	94.5	101	33	17.5	14	18	27	5.5	21.5	16.8333	0.175532	0.0972222	0.0714286	0.100279	0.136709	0.0253456	0.114728	0.0874443	0.472549	0.649329
168698	hsa-miR-3127-3p	0.21187	0.387864	90.5	232.5	92.5	86.5	81.5	94.5	30	132.5	20.5	14	12.5	-5.5	61	7	0.159574	0.736111	0.104592	0.0779944	0.0632911	N/A	0.333426	0.0706428	1.04916	0.147174
46808	hsa-miR-4485	0.569057	0.143323	95	106.5	101.5	86	90.5	86	34.5	-2.5	29	12.5	23.5	-15.5	20.3333	6.83333	0.183511	N/A	0.147959	0.0696379	0.118987	N/A	0.165735	0.0943126	0.15168	0.369997
168843	hsa-miR-5694	0.140329	N/A	70.5	108.5	69	75	69	75	12	1.5	-1	0	1	-25	4.16667	-8	0.0638298	0.00833333	N/A	N/A	0.00506329	N/A	0.0360816	0.00506329	1.08759	N/A
168732	hsa-miR-5011-5p	N/A	N/A	56.5	94.5	61	65.5	59	75	-2	-13.5	-15	-8	-10	-34	-10.1667	-17.3333	N/A	N/A	N/A	N/A	N/A	N/A	N/A	N/A	N/A	N/A
168674	hsa-miR-4716-5p	0.630469	0.299798	110.5	215	136.5	128.5	129.5	129	50.5	101.5	55	52	60	23.5	69	45.1667	0.268617	0.563889	0.280612	0.289694	0.303797	0.108295	0.371039	0.233929	0.450411	0.466084
168575	hsa-miR-4763-5p	0.569251	0.518417	75	132	82	85.5	78.5	89.5	16	26	3	8.5	9	-13	15	1.5	0.0851064	0.144444	0.0153061	0.0473538	0.0455696	N/A	0.081619	0.0464617	0.79197	0.0271531
168756	hsa-miR-548al	N/A	N/A	64	101.5	70	74	67	81.5	6.5	-6.5	0.5	-3.5	-3	-26.5	0.166667	-11	0.0345745	N/A	0.00255102	N/A	N/A	N/A	0.0185627	N/A	1.21986	N/A
168665	hsa-miR-3619-3p	0.881737	N/A	72.5	116.5	69	87	69	81	14.5	10	-2	10.5	-0.5	-28	7.5	-6	0.0771277	0.0555556	N/A	0.0584958	N/A	N/A	0.0663416	0.0584958	0.229928	N/A
168862	hsa-miR-1343-3p	0.259523	0.154192	70	114.5	73.5	75	68	83.5	9	4.5	3.5	1	2	-32	5.66667	-9.66667	0.0478723	0.025	0.0178571	0.00557103	0.0101266	N/A	0.0302432	0.00784881	0.518447	0.410414
168943	hsa-miR-4769-3p	0.539915	0.134347	148.5	241.5	155.5	145	135	163.5	91	135.5	76	70	68	31	100.833	56.3333	0.484043	0.752778	0.387755	0.389972	0.344304	0.142857	0.541525	0.292378	0.349344	0.449714
168598	hsa-miR-5007-3p	0.32817	0.451803	99.5	297	109.5	110.5	91.5	123	38	191	35.5	34	25	-19.5	88.1667	13.1667	0.202128	1.06111	0.181122	0.189415	0.126582	N/A	0.481454	0.157999	1.0429	0.281202
168940	hsa-miR-5579-5p	N/A	N/A	55.5	90	58	69	59	72	-2	-14.5	-12	-9	-11	-58	-9.5	-26	N/A	N/A	N/A	N/A	N/A	N/A	N/A	N/A	N/A	N/A
168735	hsa-miR-5586-3p	0.665344	0.687219	71	135.5	70.5	89.5	74.5	88	14.5	28	1.5	15.5	4	-27	14.6667	-2.5	0.0771277	0.155556	0.00765306	0.086351	0.0202532	N/A	0.0801121	0.0533021	0.923661	0.876855
46762	hsa-miR-3928-3p	0.184827	N/A	69	107	80	76.5	61.5	69.5	8.5	-4	-26.5	1.5	-8	-4.5	-7.33333	-3.66667	0.0452128	N/A	N/A	0.00835655	N/A	N/A	0.0452128	0.00835655	N/A	N/A
168642	hsa-miR-642b-3p	1.36032	0.496017	337	154	419.5	286.5	495	348	276	45.5	322.5	211	426.5	270	214.667	302.5	1.46809	0.252778	1.64541	1.17549	2.15949	1.24424	1.12209	1.52641	0.675569	0.359895
168909	hsa-miR-3152-5p	0.243937	0.417981	87.5	378.5	103.5	106.5	87	107	30	268	5	32	19.5	28.5	101	26.6667	0.159574	1.48889	0.0255102	0.178273	0.0987342	0.131336	0.557991	0.136115	1.44978	0.293753
168872	hsa-miR-24-1-5p	0.79696	0.482098	185.5	353	239.5	173.5	233	236	125.5	243	138.5	99	166.5	168.5	169	144.667	0.667553	1.35	0.706633	0.551532	0.843038	0.776498	0.908062	0.723689	0.422029	0.211084
168763		0.405596	0.377857	1357.5	7789.5	1840.5	1397	1857	1663.5	1298.5	7676.5	1701	1321.5	1790	1561	3558.67	1557.5	6.90691	42.6472	8.67857	7.36212	9.06329	7.19355	19.4109	7.87299	1.0377	0.13137
169192	hsa-miR-4437	0.238035	N/A	69	108	85.5	77	64.5	69	11	-0.5	-9	2.5	-4.5	-9	0.5	-3.66667	0.0585106	N/A	N/A	0.0139276	N/A	N/A	0.0585106	0.0139276	N/A	N/A
169019	hsa-miR-4524a-5p	0.223976	N/A	67.5	112	73.5	70	70.5	73	8.5	-1	-7	-7.5	2	-11.5	0.166667	-5.66667	0.0452128	N/A	N/A	N/A	0.0101266	N/A	0.0452128	0.0101266	N/A	N/A
169312	hsa-miR-548an	0.520813	0.497938	167.5	825.5	214.5	238	195	348.5	109.5	720	137	157	127.5	267	322.167	183.833	0.582447	4	0.69898	0.874652	0.64557	1.23041	1.76048	0.916879	1.10218	0.321417
169299	hsa-miR-4538	0.704745	0.359686	68	121	81	83.5	73	79.5	8	10.5	6	7	4.5	-13.5	8.16667	-0.666667	0.0425532	0.0583333	0.0306122	0.0389972	0.0227848	N/A	0.0438329	0.030891	0.317222	0.371108
169066	hsa-miR-4802-3p	N/A	N/A	56	88	55	63	57	75	-6	-16.5	-20	-11.5	-12.5	-22.5	-14.1667	-15.5	N/A	N/A	N/A	N/A	N/A	N/A	N/A	N/A	N/A	N/A
169109	hsa-miR-5003-5p	0.518444	0.0301377	70	118	71	81.5	76.5	82.5	11	12.5	-0.5	6	6.5	-18.5	7.66667	-2	0.0585106	0.0694444	N/A	0.0334262	0.0329114	N/A	0.0639775	0.0331688	0.120845	0.0109745
169006	hsa-miR-4527	N/A	N/A	68.5	111.5	67.5	68	65	73	10	6	-6.5	-2.5	-2	-29.5	3.16667	-11.3333	0.0531915	0.0333333	N/A	N/A	N/A	N/A	0.0432624	N/A	0.324574	N/A
169018	hsa-miR-4640-5p	0.713182	0.539901	111	160	89.5	110	93.5	105.5	52.5	53.5	15.5	30.5	28	-5	40.5	17.8333	0.279255	0.297222	0.0790816	0.169916	0.141772	N/A	0.21852	0.155844	0.55414	0.127698
169009	hsa-miR-548ap-5p/hsa-miR-548j-5p	0.71184	0.4705	403.5	839	338	396.5	405.5	445	345	724.5	239	319	338.5	336	436.167	331.167	1.83511	4.025	1.21939	1.77716	1.71392	1.54839	2.35983	1.67982	0.624864	0.0703268
169142	hsa-miR-550a-5p	0.476854	0.126377	187.5	157	152.5	115.5	130.5	137	129.5	55	80	40.5	62.5	27.5	88.1667	43.5	0.68883	0.305556	0.408163	0.225627	0.316456	0.126728	0.467516	0.222937	0.424394	0.425647
169295	hsa-miR-4725-3p	1.12299	0.749191	185.5	141.5	195.5	184	200.5	196	126.5	33.5	120.5	108	132.5	83	93.5	107.833	0.672872	0.186111	0.614796	0.601671	0.670886	0.382488	0.49126	0.551682	0.541174	0.272906
169370	hsa-miR-4693-5p	N/A	N/A	61.5	95	65.5	71	60.5	74	3.5	-11.5	-6	-9.5	-6.5	-37.5	-4.66667	-17.8333	0.018617	N/A	N/A	N/A	N/A	N/A	0.018617	N/A	N/A	N/A
168995	hsa-miR-4791	0.611072	0.194479	520.5	1016.5	1232.5	445.5	612	851.5	460.5	907.5	1168	369	546.5	737	845.333	550.833	2.44947	5.04167	5.95918	2.05571	2.76709	3.39631	4.48344	2.7397	0.40599	0.244815
168976	hsa-miR-3135b	0.572715	0.485633	99	179.5	94	107	88.5	118	39.5	74	15.5	28	22	-21.5	43	9.5	0.210106	0.411111	0.0790816	0.155989	0.111392	N/A	0.233433	0.133691	0.716434	0.235876
169016	hsa-miR-4743-5p	1.98192	0.368044	71.5	114	72.5	87.5	76	79	13.5	3	0.5	12.5	10	-74.5	5.66667	-17.3333	0.0718085	0.0166667	0.00255102	0.0696379	0.0506329	N/A	0.0303421	0.0601354	1.20618	0.223471
169154	hsa-miR-4803	N/A	N/A	68	109.5	78.5	76	66	85	8.5	7	9.5	-2	-2	-41.5	8.33333	-15.1667	0.0452128	0.0388889	0.0484694	N/A	N/A	N/A	0.0441903	N/A	0.110237	N/A
169050	hsa-miR-4787-5p	0.807562	0.165991	5908.5	7471.5	6193.5	5453	6000.5	5148	5848.5	7363.5	6129.5	5379.5	5933.5	5078	6447.17	5463.67	31.109	40.9083	31.273	29.9694	30.043	23.4009	34.4301	27.8044	0.162965	0.137163
169372	hsa-miR-5011-3p	N/A	N/A	61	107	78	64	61.5	63.5	2	-1	-13.5	-8.5	-5.5	-10	-4.16667	-8	0.0106383	N/A	N/A	N/A	N/A	N/A	0.0106383	N/A	N/A	N/A
169133	hsa-miR-4537	0.218199	N/A	72.5	104	82.5	74	66	68.5	12	-4.5	-13	2.5	-1	-8.5	-1.83333	-2.33333	0.0638298	N/A	N/A	0.0139276	N/A	N/A	0.0638298	0.0139276	N/A	N/A
169339	hsa-miR-5579-3p	N/A	N/A	61.5	104	72.5	67.5	59	63.5	2	-2.5	-11.5	-4.5	-7.5	-12.5	-4	-8.16667	0.0106383	N/A	N/A	N/A	N/A	N/A	0.0106383	N/A	N/A	N/A
169148		1.09855	0.781842	123.5	133	118	118.5	121	128	65.5	25	30.5	42.5	54.5	42	40.3333	46.3333	0.348404	0.138889	0.155612	0.236769	0.275949	0.193548	0.214302	0.235422	0.543331	0.175077
168865		0.400607	0.164513	84	106	98	81.5	79.5	81	24	-2	13	7	13.5	2	11.6667	7.5	0.12766	N/A	0.0663265	0.0389972	0.0683544	0.00921659	0.0969931	0.0388561	0.447135	0.760992
169352		0.359043	0.0442828	77	128.5	84	79	77.5	86	17.5	23	11.5	4.5	8.5	7	17.3333	6.66667	0.0930851	0.127778	0.0586735	0.0250696	0.043038	0.0322581	0.0931788	0.0334552	0.370817	0.270325
169397	hsa-miR-3184-5p	0.403566	0.0119303	66.5	120	71.5	82	71	77	9	9	-3.5	3	4.5	-13	4.83333	-1.83333	0.0478723	0.05	N/A	0.0167131	0.0227848	N/A	0.0489362	0.019749	0.0307438	0.217397
168566		0.770605	0.190904	75.5	125.5	67	90.5	77.5	84.5	16	16.5	-6	14	11.5	-5	8.83333	6.83333	0.0851064	0.0916667	N/A	0.0779944	0.0582278	N/A	0.0883865	0.0681111	0.0524834	0.20521
169405		0.176044	0.39264	750	21800.5	1795.5	1023	1414	2573.5	690.5	21689	1728.5	945.5	1344.5	2460	8036	1583.33	3.67287	120.494	8.81888	5.26741	6.80759	11.3364	44.3287	7.8038	1.48914	0.404259
169300		0.783108	N/A	68.5	109	74.5	77.5	67.5	80	11	4	3	4.5	-0.5	-10.5	6	-2.16667	0.0585106	0.0222222	0.0153061	0.0250696	N/A	N/A	0.032013	0.0250696	0.724916	N/A
168554		0.691667	0.616836	71.5	127	80	85.5	75	88	12	22	4	8	10	-2.5	12.6667	5.16667	0.0638298	0.122222	0.0204082	0.0445682	0.0506329	N/A	0.0688201	0.0476006	0.742373	0.0900906
168780		0.45217	0.381744	69.5	118	72.5	81	72	93	11.5	11.5	1.5	4	3.5	-12.5	8.16667	-1.66667	0.0611702	0.0638889	0.00765306	0.0222841	0.0177215	N/A	0.0442374	0.0200028	0.716862	0.16129
46210	hsa-miR-1249	0.408603	0.112695	158.5	302	150	131.5	127.5	107	93	180	82	55.5	56	41	118.333	50.8333	0.494681	1	0.418367	0.309192	0.283544	0.18894	0.637683	0.260559	0.495681	0.243076
42543	hsa-miR-608	0.714008	0.272551	85.5	155	84.5	94.5	84	80	21	30.5	16.5	19.5	15.5	16	22.6667	17	0.111702	0.169444	0.0841837	0.108635	0.078481	0.0737327	0.121777	0.0869496	0.357326	0.217708
17431		0.309934	0.302461	139	423	117.5	120.5	111	110.5	72	299	51	48.5	44	48	140.667	46.8333	0.382979	1.66111	0.260204	0.270195	0.222785	0.221198	0.768098	0.238059	1.01003	0.116952
42923	hsa-miR-30c-5p	0.950437	0.811127	961.5	1664.5	1133	1062.5	1211.5	1483	897.5	1544	1063.5	988	1143.5	1422	1168.33	1184.5	4.77394	8.57778	5.42602	5.50418	5.78987	6.553	6.25924	5.94902	0.324992	0.0911439
11231		0.257289	0.268891	82	216	90.5	89	80.5	80	18	93.5	21	10.5	11.5	15	44.1667	12.3333	0.0957447	0.519444	0.107143	0.0584958	0.0582278	0.0691244	0.240777	0.0619494	1.00259	0.100328
42633	hsa-miR-885-3p	0.634541	0.400485	79	146	74	85	77	74.5	15	28	7	10	12.5	11.5	16.6667	11.3333	0.0797872	0.155556	0.0357143	0.0557103	0.0632911	0.0529954	0.0903524	0.0573323	0.670875	0.0930728
42808	hsa-miR-874-3p	1.32707	0.0137649	562	627	724.5	785	804.5	931	498	504.5	657.5	709	738	868	553.333	771.667	2.64894	2.80278	3.35459	3.94986	3.73671	4	2.93544	3.89552	0.126407	0.0358882
45775	hsa-miR-1279	0.295904	0.0261021	94	150.5	85	80.5	81.5	70	28.5	29	18	5	14.5	4	25.1667	7.83333	0.151596	0.161111	0.0918367	0.0278552	0.0734177	0.0184332	0.134848	0.039902	0.278472	0.736937
42967		0.890004	0.669426	124.5	141.5	119	110	110.5	118	60	23.5	56.5	37	43.5	50	46.6667	43.5	0.319149	0.130556	0.288265	0.206128	0.220253	0.230415	0.24599	0.218932	0.411215	0.0557118
42518		0.765344	0.456798	236	549	334.5	307	263	339.5	175	428	263	235	195	274	288.667	234.667	0.930851	2.37778	1.34184	1.30919	0.987342	1.26267	1.55016	1.1864	0.480996	0.146623
17810	hsa-miR-29b-1-5p	0.460239	0.236799	217.5	556.5	233	174.5	186.5	220	154	432.5	165	101.5	118	153.5	250.5	124.333	0.819149	2.40278	0.841837	0.56546	0.597468	0.707373	1.35459	0.623434	0.670189	0.119395
17353	hsa-miR-609	0.294363	0.0925516	92	156.5	78	83	82	68.5	29.5	32	10.5	7.5	12.5	2	24	7.33333	0.156915	0.177778	0.0535714	0.0417827	0.0632911	0.00921659	0.129421	0.0380968	0.513911	0.714628
42584	hsa-miR-432-3p	0.662287	0.30571	90.5	168	89.5	99	91	90.5	28.5	48.5	20	22.5	20	26	32.3333	22.8333	0.151596	0.269444	0.102041	0.125348	0.101266	0.119816	0.17436	0.115477	0.493187	0.109234
42446	hsa-miR-576-5p	0.822649	0.634932	150.5	333	174	169.5	165	235	87.5	214.5	102.5	94.5	95.5	170	134.833	120	0.465426	1.19167	0.522959	0.526462	0.483544	0.78341	0.726684	0.597806	0.555556	0.271266
42608		0.292558	0.0867917	102	174	88	88	80	72.5	37.5	56	18.5	13.5	11	10	37.3333	11.5	0.199468	0.311111	0.0943878	0.0752089	0.0556962	0.0460829	0.201656	0.058996	0.537442	0.251555
46434		0.310565	0.0373598	83	143.5	77	82	73.5	68	19	24.5	12	7.5	5.5	5	18.5	6	0.101064	0.136111	0.0612245	0.0417827	0.0278481	0.0230415	0.0994665	0.0308908	0.376698	0.315112
10975	hsa-miR-182-5p	0.244818	0.181864	75.5	117.5	67.5	75.5	71.5	66.5	10.5	-5	3	2.5	1.5	1	2.83333	1.66667	0.0558511	N/A	0.0153061	0.0139276	0.00759494	0.00460829	0.0355786	0.00871027	0.80581	0.546332
17437	kshv-miR-K12-7-3p	N/A	N/A	79	129.5	72.5	69.5	65.5	62.5	18	8.5	8	-4	-2	-1.5	11.5	-2.5	0.0957447	0.0472222	0.0408163	N/A	N/A	N/A	0.0612611	N/A	0.490278	N/A
19601		0.212955	0.187614	103	236.5	91.5	91.5	82.5	75.5	40	117.5	24.5	16	14.5	10.5	60.6667	13.6667	0.212766	0.652778	0.125	0.0891365	0.0734177	0.0483871	0.330181	0.0703138	0.856506	0.292279
46356	hsa-miR-30b-3p	0.577205	0.135568	113.5	145	96	91.5	95.5	85.5	48	25.5	28.5	13.5	26.5	22.5	34	20.8333	0.255319	0.141667	0.145408	0.0752089	0.134177	0.103687	0.180798	0.104358	0.357108	0.282585
33596	hsa-miR-126-5p	0.309632	0.0235281	100	164	89	82	83.5	77.5	36	37.5	21.5	6	15	10.5	31.6667	10.5	0.191489	0.208333	0.109694	0.0334262	0.0759494	0.0483871	0.169839	0.0525875	0.310668	0.410183
29190	hsa-miR-708-5p	0.253545	0.0519541	241	514	288	133.5	147.5	138.5	175	388.5	219	60	75	76.5	260.833	70.5	0.930851	2.15833	1.11735	0.334262	0.379747	0.352535	1.40218	0.355514	0.471735	0.0643812
33116		0.869466	0.40469	169	267.5	170.5	180.5	170	179.5	103.5	141	102	104	97.5	117	115.5	106.167	0.550532	0.783333	0.520408	0.579387	0.493671	0.539171	0.618091	0.53741	0.232804	0.0798
14962	hsa-miR-581	0.326446	0.0119262	104	165	95	84	84.5	74.5	39	40	26	11.5	14.5	10	35	12	0.207447	0.222222	0.132653	0.0640669	0.0734177	0.0460829	0.187441	0.0611892	0.256183	0.227046
17946	hsa-miR-192-3p	0.397735	0.0916489	101.5	149.5	81.5	86	79	73	37.5	24	14.5	8.5	13.5	10	25.3333	10.6667	0.199468	0.133333	0.0739796	0.0473538	0.0683544	0.0460829	0.135594	0.0539304	0.462962	0.231924
42709		0.374086	0.094554	91	163.5	83	85	76.5	76	26.5	40	15.5	12.5	8	12	27.3333	10.8333	0.140957	0.222222	0.0790816	0.0696379	0.0405063	0.0552995	0.14742	0.0551479	0.486967	0.264133
17563	hsa-miR-644a	0.252882	0.0125233	89	158.5	89	85.5	78	70.5	26	34.5	21.5	9.5	6.5	5.5	27.3333	7.16667	0.138298	0.191667	0.109694	0.0529248	0.0329114	0.0253456	0.146553	0.0370606	0.283892	0.384507
17623	ebv-miR-BART14-3p	0.416172	0.0931893	99	172	88	87.5	89	73	35.5	48	21	15.5	21	9	34.8333	15.1667	0.18883	0.266667	0.107143	0.086351	0.106329	0.0414747	0.187546	0.0780516	0.425333	0.425542
17465		0.47589	0.0116816	129	200	124	106	105.5	102	66.5	78.5	56.5	31	34	36.5	67.1667	33.8333	0.353723	0.436111	0.288265	0.172702	0.172152	0.168203	0.359367	0.171019	0.206152	0.0143509
42456		0.341281	0.0442535	102.5	168	90	83	87.5	80.5	39	45	22	7	17.5	14.5	35.3333	13	0.207447	0.25	0.112245	0.0389972	0.0886076	0.0668203	0.189897	0.0648084	0.371435	0.38369
11121	hsa-miR-489-3p	0.791069	0.240561	164	212.5	127	131.5	145	150	98.5	90	62	57.5	71.5	82	83.5	70.3333	0.523936	0.5	0.316327	0.320334	0.362025	0.37788	0.446754	0.353413	0.254247	0.0841052
46929	hsa-miR-548n	0.220825	0.0488848	97	163	84.5	78.5	82	72.5	32	44	17	4.5	11	6.5	31	7.33333	0.170213	0.244444	0.0867347	0.0250696	0.0556962	0.0299539	0.167131	0.0369066	0.472086	0.445842
42663	hsa-miR-20a-3p	0.579243	0.266057	86.5	129.5	80.5	78.5	83	78.5	21	11	11.5	1.5	13	13	14.5	9.16667	0.111702	0.0611111	0.0586735	0.00835655	0.0658228	0.0599078	0.0771622	0.0446957	0.387978	0.707211
42883		0.671056	0.42036	117.5	132	136	99	104	104	53.5	12.5	69	23.5	34.5	36.5	45	31.5	0.284574	0.0694444	0.352041	0.130919	0.174684	0.168203	0.235353	0.157935	0.627092	0.149554
10988	hsa-miR-194-5p	0.325771	0.00435572	90	140.5	102.5	81.5	79	71.5	26.5	20.5	31	7	12.5	7	26	8.83333	0.140957	0.113889	0.158163	0.0389972	0.0632911	0.0322581	0.13767	0.0448488	0.162124	0.363959
14854	hsa-miR-569	0.215258	0.0536071	77	132	75	75.5	69.5	68	12.5	14.5	5	1.5	2.5	3.5	10.6667	2.5	0.0664894	0.0805556	0.0255102	0.00835655	0.0126582	0.016129	0.0575184	0.0123813	0.497201	0.314478
42816		0.517016	0.124441	101	153	82	93.5	82	80.5	36	33.5	15.5	17	12	17.5	28.3333	15.5	0.191489	0.186111	0.0790816	0.0947075	0.0607595	0.0806452	0.152227	0.0787041	0.416503	0.216724
32946	hsa-miR-486-5p	0.262788	0.0924983	129.5	256	118.5	97	95	89.5	65.5	137	52	20.5	26.5	24.5	84.8333	23.8333	0.348404	0.761111	0.265306	0.114206	0.134177	0.112903	0.458274	0.120429	0.579426	0.0990148
46322		0.17786	N/A	82.5	132.5	73.5	72	70.5	67	18.5	9	9	-3	0	2.5	12.1667	-0.166667	0.0984043	0.05	0.0459184	N/A	N/A	0.0115207	0.0647742	0.0115207	0.450733	N/A
46698		1.31948	0.622161	5786.5	263.5	8180.5	6411	8713	3706	5724	143.5	8114.5	6336	8643.5	3643.5	4660.67	6207.67	30.4468	0.797222	41.4005	35.2981	43.7646	16.7903	24.2148	31.951	0.867516	0.431758
46735	hsa-miR-1179	0.308728	0.0617114	89.5	142	77.5	78	77.5	74.5	24.5	20.5	10.5	1	7.5	10.5	18.5	6.33333	0.130319	0.113889	0.0535714	0.00557103	0.0379747	0.0483871	0.0992598	0.0306443	0.407125	0.728667
46479	hsa-miR-1304-5p	0.458875	0.000119813	148	209	148	109.5	112	106.5	83.5	81	86	32	46	43.5	83.5	40.5	0.444149	0.45	0.438776	0.178273	0.232911	0.200461	0.444308	0.203882	0.0126352	0.134781
28979		0.351146	0.0741923	105.5	185.5	93	91.5	84	80.5	41	59.5	24	12	16.5	18.5	41.5	15.6667	0.218085	0.330556	0.122449	0.0668524	0.0835443	0.0852535	0.223697	0.07855	0.465661	0.129427
31076	hsa-miR-559	1.23659	0.429132	119.5	193.5	99.5	149	137	135	57	72	30	73	66	69	53	69.3333	0.303191	0.4	0.153061	0.406685	0.334177	0.317972	0.285418	0.352945	0.435941	0.133847
42557	hsa-miR-624-5p	0.446804	0.0839855	172	296.5	153	136	130.5	117.5	109	173.5	86	60.5	61.5	51.5	122.833	57.8333	0.579787	0.963889	0.438776	0.337047	0.311392	0.237327	0.660817	0.295256	0.411268	0.175379
27537	ebv-miR-BART13-3p	1.09249	0.689444	538	940	571	772.5	710.5	796.5	473	816	503	694	644	733	597.333	690.333	2.51596	4.53333	2.56633	3.8663	3.26076	3.37788	3.20521	3.50164	0.358937	0.0917226
42631		0.155127	0.235407	89	218	74.5	84	76	69.5	25	92.5	11	8.5	9	3.5	42.8333	7	0.132979	0.513889	0.0561224	0.0473538	0.0455696	0.016129	0.23433	0.0363508	1.04611	0.48239
17525		0.247087	N/A	83.5	131	78.5	73.5	72.5	64.5	20.5	9	11	0	3.5	-3	13.5	0.166667	0.109043	0.05	0.0561224	N/A	0.0177215	N/A	0.0717217	0.0177215	0.452659	N/A
11225		0.206152	0.0766553	77.5	127.5	75.5	74.5	69	62	13.5	6	9	1	3	-2	9.5	0.666667	0.0718085	0.0333333	0.0459184	0.00557103	0.0151899	N/A	0.0503534	0.0103805	0.389592	0.655227
42553	hsa-miR-216a-5p	0.492987	0.0459955	92.5	148	85.5	90	85.5	75	27	26	17.5	15	12.5	8.5	23.5	12	0.143617	0.144444	0.0892857	0.0835655	0.0632911	0.0391705	0.125782	0.062009	0.251305	0.358419
42546		0.224242	0.0370197	101	166.5	87	85	76	71	36.5	45	19	10	7.5	6	33.5	7.83333	0.194149	0.25	0.0969388	0.0557103	0.0379747	0.0276498	0.180363	0.0404449	0.429448	0.350908
42544		0.149569	0.232754	85	209	80.5	84.5	73.5	69	21.5	90	13	6	8.5	5.5	41.5	6.66667	0.114362	0.5	0.0663265	0.0334262	0.043038	0.0253456	0.226896	0.0339366	1.04775	0.260993
11253		0.501863	0.0304262	99	145	91.5	90.5	85	83	35.5	23.5	23.5	12	13.5	18.5	27.5	14.6667	0.18883	0.130556	0.119898	0.0668524	0.0683544	0.0852535	0.146428	0.0734868	0.253407	0.139044
42595		0.883864	0.767253	284	543	220	354	232.5	370	219.5	421.5	149.5	276.5	163	306	263.5	248.5	1.16755	2.34167	0.762755	1.54039	0.825316	1.41014	1.42399	1.25861	0.575915	0.3026
32891	hsa-miR-769-5p	0.447223	0.0181482	134.5	207	126	107	103	106.5	70	89.5	60	32.5	33.5	38	73.1667	34.6667	0.37234	0.497222	0.306122	0.181058	0.16962	0.175115	0.391895	0.175265	0.247615	0.0326397
42763		1.12135	0.419664	529.5	458.5	473	569.5	554	496.5	466	338.5	406.5	497.5	486	430	403.667	471.167	2.47872	1.88056	2.07398	2.77159	2.46076	1.98157	2.14442	2.40464	0.142342	0.165509
11249		0.239198	0.0591958	95.5	167	86	83	78	71	31	48.5	18.5	6.5	11	7.5	32.6667	8.33333	0.164894	0.269444	0.0943878	0.0362117	0.0556962	0.0345622	0.176242	0.0421567	0.499758	0.278829
11245	hsa-miR-433-5p	1.08238	0.543098	1627	1517.5	2112	1878	1670	2360.5	1563	1403.5	2043	1800.5	1602	2295.5	1669.83	1899.33	8.31383	7.79722	10.4235	10.0306	8.11139	10.5783	8.84484	9.57346	0.157303	0.135318
42836		0.579535	0.0133127	92	145	90	97	86	78	28	24	23.5	16.5	16.5	12.5	25.1667	15.1667	0.148936	0.133333	0.119898	0.091922	0.0835443	0.0576037	0.134056	0.07769	0.108407	0.230306
31867	hsa-miR-145-3p	0.573218	0.432682	158.5	470.5	165	175	161.5	213.5	95	350.5	100.5	97	92	150.5	182	113.167	0.505319	1.94722	0.512755	0.54039	0.465823	0.693548	0.988432	0.566587	0.840063	0.204913
27821	spike_control_v2_26	0.784516	0.69514	1930.5	190	1275	1009.5	892.5	844	1866.5	72	1207.5	932.5	823	775.5	1048.67	843.667	9.92819	0.4	6.16071	5.19499	4.16709	3.57373	5.4963	4.31194	0.873081	0.190234
27291	spike_control_v2_22	0.763653	0.283803	4418.5	2709.5	2624	2493.5	2732.5	2601	4353	2590.5	2558.5	2417.5	2663	2536.5	3167.33	2539	23.1543	14.3917	13.0536	13.468	13.4835	11.6889	16.8665	12.8802	0.325278	0.0800959
146165	hsa-miR-1973	0.695135	0.240081	209	213	275.5	173.5	180	167.5	144	86.5	208	101	111.5	103.5	146.167	105.333	0.765957	0.480556	1.06122	0.562674	0.564557	0.476959	0.769246	0.53473	0.377446	0.0935805
146130		0.690991	0.10942	89.5	140.5	89.5	90	82	76	24.5	15	20.5	15.5	15	12.5	20	14.3333	0.130319	0.0833333	0.104592	0.086351	0.0759494	0.0576037	0.106081	0.0733013	0.221795	0.19857
145996		0.302101	0.392083	561	5929	984.5	606.5	647.5	1373	497	5802	915.5	531.5	583	1309.5	2404.83	808	2.64362	32.2333	4.67092	2.961	2.9519	6.03456	13.1826	3.98249	1.25389	0.446242
146119		0.390819	0.00818757	93.5	150	89.5	85.5	79.5	72.5	29.5	22.5	22	10.5	12.5	7	24.6667	10	0.156915	0.125	0.112245	0.0584958	0.0632911	0.0322581	0.131387	0.0513483	0.175129	0.325339
13367	spike_control_v2_3	1.11428	0.782113	359	182	270	313.5	267	272	294	59	201	235.5	194	207.5	184.667	212.333	1.56383	0.327778	1.02551	1.31198	0.982278	0.956221	0.972373	1.08349	0.637345	0.183022
146012		1.12842	0.767976	207.5	150.5	263	211	199.5	223.5	143.5	24.5	192.5	134	129	157	120.167	140	0.763298	0.136111	0.982143	0.746518	0.653165	0.723502	0.627184	0.707728	0.700166	0.0687195
146210		0.648183	0.24065	89.5	148	78	86.5	84.5	81.5	26.5	26	11	12	15.5	16.5	21.1667	14.6667	0.140957	0.144444	0.0561224	0.0668524	0.078481	0.0760369	0.113841	0.0737901	0.439352	0.0830906
146096	hsa-miR-764	0.63206	0.0871922	91.5	160.5	89	91	81.5	89	28.5	33	21.5	17	14.5	24.5	27.6667	18.6667	0.151596	0.183333	0.109694	0.0947075	0.0734177	0.112903	0.148208	0.0936762	0.249221	0.210971
13186	spike_control_v2_2	1.04763	0.922014	274	145.5	358	274	250.5	254	211.5	22	295	199.5	177.5	189.5	176.167	188.833	1.125	0.122222	1.5051	1.11142	0.898734	0.873272	0.917441	0.961142	0.778712	0.136053
146223		0.403898	0.0191411	120.5	187.5	102.5	90	95.5	91.5	55	61.5	39.5	15	26.5	26	52	22.5	0.292553	0.341667	0.201531	0.0835655	0.134177	0.119816	0.278583	0.112519	0.255237	0.231807
146151	hsa-miR-449c-5p	0.482897	N/A	83.5	131.5	80.5	78.5	77	63	20	10	14.5	-1	7.5	-0.5	14.8333	2	0.106383	0.0555556	0.0739796	N/A	0.0379747	N/A	0.0786394	0.0379747	0.327217	N/A
145868		N/A	N/A	73	122.5	61.5	68.5	67	62	10.5	1	-5.5	-8.5	-3	-2.5	2	-4.66667	0.0558511	0.00555556	N/A	N/A	N/A	N/A	0.0307033	N/A	1.15832	N/A
146173	hsa-miR-2114-3p	0.285151	0.0542416	83.5	159	85.5	78.5	81.5	71.5	20.5	34	15.5	4.5	9	8	23.3333	7.16667	0.109043	0.188889	0.0790816	0.0250696	0.0455696	0.0368664	0.125671	0.0358352	0.451662	0.287115
29544	spike_control_v2_44	1.00649	0.983852	733.5	323.5	636.5	609.5	546.5	553	671.5	202	568	533.5	478	488	480.5	499.833	3.57181	1.12222	2.89796	2.97214	2.42025	2.24885	2.53066	2.54708	0.500036	0.148389
17932	hsa-miR-381-5p	0.599536	0.00142036	140.5	193.5	154	120.5	128	113.5	79	77.5	86.5	47.5	57.5	47.5	81	50.8333	0.420213	0.430556	0.441327	0.264624	0.291139	0.218894	0.430698	0.258219	0.0245128	0.141531
146018		0.142764	0.0106622	91	146	79	81.5	73.5	67	27	23.5	14.5	4.5	3.5	1.5	21.6667	3.16667	0.143617	0.130556	0.0739796	0.0250696	0.0177215	0.00691244	0.116051	0.0165679	0.318958	0.551272
146155		1.24953	0.479025	5219	1800.5	5705	5709.5	5849	4665	5155.5	1681.5	5635.5	5632.5	5784	4600.5	4157.5	5339	27.4229	9.34167	28.7526	31.3788	29.2861	21.2005	21.839	27.2885	0.496516	0.196977
146047		0.492791	0.00476748	93	147	88	92.5	83.5	76.5	29	27	25	16	13.5	12	27	13.8333	0.154255	0.15	0.127551	0.0891365	0.0683544	0.0552995	0.143935	0.0709302	0.0996833	0.240587
146136	hsa-miR-518d-5p/hsa-miR-520c-5p/hsa-miR-526a	1.08258	0.813758	144.5	150	149	162	134.5	126	82	26.5	85	85.5	66.5	62.5	64.5	71.5	0.43617	0.147222	0.433673	0.476323	0.336709	0.288018	0.339022	0.367017	0.489963	0.266316
145852	hsa-miR-210-3p	1.05486	0.657797	1493.5	1145.5	1646.5	1314.5	1690.5	1677	1431	1025.5	1578.5	1237	1621	1613.5	1345	1490.5	7.6117	5.69722	8.05357	6.89136	8.20759	7.43548	7.12083	7.51148	0.175895	0.0880516
145644		1.09095	0.611788	232.5	218.5	195.5	203	212	251	169.5	95.5	130	128.5	144	182.5	131.667	151.667	0.901596	0.530556	0.663265	0.715877	0.729114	0.841014	0.698472	0.762002	0.269172	0.0902174
145742	hsa-miR-935	0.458615	0.0606037	98.5	158.5	84.5	90.5	78.5	80	34	33	19	17	8.5	16	28.6667	13.8333	0.180851	0.183333	0.0969388	0.0947075	0.043038	0.0737327	0.153708	0.0704927	0.319951	0.368644
145928		1.27414	0.200158	6928	5575	10420.5	9858.5	10253	10116	6863	5451.5	10352	9784.5	10184	10052	7555.5	10006.8	36.5053	30.2861	52.8163	54.5097	51.5646	46.3226	39.8693	50.799	0.291847	0.0816342
145915		0.306573	0.0812541	96.5	173	86	87	85	73.5	33.5	47.5	17.5	8	17	7	32.8333	10.6667	0.178191	0.263889	0.0892857	0.0445682	0.0860759	0.0322581	0.177122	0.0543008	0.492917	0.519295
145750	hsa-miR-614	0.98824	0.984837	132.5	174.5	79	146.5	87	103	68	51	8.5	73	19	38.5	42.5	43.5	0.361702	0.283333	0.0433673	0.406685	0.0962025	0.177419	0.229468	0.226769	0.722815	0.710048
145981	hsa-miR-1285-3p	1.07558	0.753539	398.5	604.5	783	602.5	732.5	585	335	479	715	525.5	665	522.5	509.667	571	1.78191	2.66111	3.64796	2.92758	3.36709	2.40783	2.697	2.90083	0.346141	0.165534
145634	hsa-miR-132-5p	0.377775	0.0414665	241	342.5	180	146	129.5	136	178	218.5	110	69	63	70.5	168.833	67.5	0.946809	1.21389	0.561224	0.384401	0.318987	0.324885	0.907307	0.342758	0.361642	0.105569
145847	hsa-miR-766-3p	0.397102	0.0502554	86	159	83	83	82.5	75	21	31.5	18.5	6.5	15	8.5	23.6667	10	0.111702	0.175	0.0943878	0.0362117	0.0759494	0.0391705	0.12703	0.0504439	0.334061	0.438862
147954	hsa-miR-4318	0.865467	0.777734	86	132	78	81.5	80.5	72	20.5	6.5	6	8.5	12.5	9	11	10	0.109043	0.0361111	0.0306122	0.0473538	0.0632911	0.0414747	0.0585886	0.0507065	0.747257	0.222616
147902	hsa-miR-3193	1.04859	0.905459	117	150.5	85.5	123	101.5	91.5	53.5	28	18.5	47	33.5	28	33.3333	36.1667	0.284574	0.155556	0.0943878	0.261838	0.16962	0.129032	0.178173	0.18683	0.544919	0.364262
147994		0.54078	0.113133	110.5	210	124	104	110.5	103.5	46	88	55	29.5	39	40.5	63	36.3333	0.244681	0.488889	0.280612	0.164345	0.197468	0.186636	0.338061	0.182817	0.390021	0.0923798
147751	hsa-miR-4274	0.518965	0.0444355	149.5	242.5	142.5	118.5	121.5	114	85	114.5	71.5	45	53	51	90.3333	49.6667	0.452128	0.636111	0.364796	0.250696	0.268354	0.235023	0.484345	0.251358	0.285947	0.0663418
147825		0.649022	0.290027	1308	517	1271	749.5	642	729	1243.5	391	1206.5	673	570.5	664	947	635.833	6.61436	2.17222	6.15561	3.7493	2.88861	3.05991	4.98073	3.23261	0.490497	0.140938
147979	hsa-miR-3150a-3p	0.136583	0.00555812	99	142	90.5	79	77	67.5	33	21	21.5	2	5	4	25.1667	3.66667	0.175532	0.116667	0.109694	0.0111421	0.0253165	0.0184332	0.133964	0.0182972	0.269976	0.387391
147532		1.22182	0.0809751	2199	1816	2344.5	2662	2706.5	2629	2134.5	1692.5	2283	2587.5	2638.5	2564.5	2036.67	2596.83	11.3537	9.40278	11.648	14.415	13.3595	11.818	10.8015	13.1975	0.112968	0.098965
147808		0.499449	0.109505	81	132.5	78	79.5	78.5	76.5	18.5	17	10.5	2.5	12	10.5	15.3333	8.33333	0.0984043	0.0944444	0.0535714	0.0139276	0.0607595	0.0483871	0.08214	0.0410247	0.30217	0.591558
147540	hsa-miR-4310	N/A	N/A	80	129	66.5	74	62.5	64	18.5	6	6	-2.5	-1	-2	10.1667	-1.83333	0.0984043	0.0333333	0.0306122	N/A	N/A	N/A	0.0541166	N/A	0.709179	N/A
147828	hsa-miR-3121-3p	0.863663	0.62217	86	136.5	78.5	92.5	87	74.5	22.5	15.5	11.5	15.5	18.5	10.5	16.5	14.8333	0.119681	0.0861111	0.0586735	0.086351	0.0936709	0.0483871	0.0881551	0.0761363	0.346605	0.319278
147878		0.255143	0.0937063	87	157.5	78.5	83	74	71.5	23	39	12	7.5	6	6.5	24.6667	6.66667	0.12234	0.216667	0.0612245	0.0417827	0.0303797	0.0299539	0.133411	0.0340388	0.586986	0.197123
147564	hsa-miR-4266	0.359478	0.203415	77	136	72	78	71.5	65	12.5	9	4.5	1	5.5	-1	8.66667	1.83333	0.0664894	0.05	0.0229592	0.00557103	0.0278481	N/A	0.0464828	0.0167096	0.472802	0.94271
147614	hsa-miR-4299	1.11172	0.595262	369.5	302.5	453.5	355	438.5	432	306.5	181	388	282	370	366	291.833	339.333	1.63032	1.00556	1.97959	1.57103	1.87342	1.68664	1.53849	1.71036	0.320749	0.0892111
147822	hsv2-miR-H23-5p	0.143528	0.00973168	83	142	67	75.5	73	63	19	21.5	-1.5	2.5	3.5	0	13	2	0.101064	0.119444	N/A	0.0139276	0.0177215	N/A	0.110254	0.0158245	0.117883	0.169529
147780	hsa-miR-4267	0.257729	0.0869961	87	142.5	71.5	76	77	63.5	24.5	21.5	7	3	8.5	3	17.6667	4.83333	0.130319	0.119444	0.0357143	0.0167131	0.043038	0.0138249	0.0951593	0.0245253	0.544006	0.656356
148351	hsa-miR-3945	0.421901	0.0401592	114.5	170	93	92	85	83.5	51.5	43	26.5	17	18	19	40.3333	18	0.273936	0.238889	0.135204	0.0947075	0.0911392	0.0875576	0.21601	0.0911348	0.333968	0.0392272
148597		0.811563	0.646803	180.5	370.5	143	207	166.5	208.5	115.5	242	75.5	132	98.5	145	144.333	125.167	0.614362	1.34444	0.385204	0.735376	0.498734	0.668203	0.781337	0.634104	0.641139	0.192319
147511		0.923521	0.889157	94	136.5	80	82.5	89.5	78.5	28.5	4	11	11.5	17	13.5	14.5	14	0.151596	0.0222222	0.0561224	0.0640669	0.0860759	0.062212	0.0766468	0.0707849	0.87524	0.187538
148454	hsa-miR-3682-3p	0.343746	0.195237	93	162	75.5	78.5	81	66	26.5	35	12	4.5	13	0	24.5	5.83333	0.140957	0.194444	0.0612245	0.0250696	0.0658228	N/A	0.132209	0.0454462	0.507073	0.634086
147486		0.310259	0.065246	85.5	143	74	78	76	66.5	22	17	9	4.5	9	2	16	5.16667	0.117021	0.0944444	0.0459184	0.0250696	0.0455696	0.00921659	0.0857947	0.0266186	0.423477	0.684707
148282	hsa-miR-3714	0.278795	0.178326	114	235	91.5	94	93	78	51	110	22.5	17.5	22	15	61.1667	18.1667	0.271277	0.611111	0.114796	0.097493	0.111392	0.0691244	0.332395	0.09267	0.763368	0.232468
147949		0.0929798	0.127291	83	133	73	72.5	72	65.5	20.5	10.5	6.5	-1	2	0.5	12.5	0.5	0.109043	0.0583333	0.0331633	N/A	0.0101266	0.00230415	0.0668464	0.00621536	0.578181	0.889939
148039	hsa-miR-3925-5p	0.56791	0.381517	92.5	133	74.5	88.5	77.5	67.5	27.5	10.5	9	15	7.5	4.5	15.6667	9	0.146277	0.0583333	0.0459184	0.0835655	0.0379747	0.0207373	0.0835094	0.0474258	0.655151	0.684497
148601	hsa-miR-3617-5p	0.166441	N/A	77	124	70.5	71.5	69.5	59	12.5	4	0.5	-5	1	-5	5.66667	-3	0.0664894	0.0222222	0.00255102	N/A	0.00506329	N/A	0.0304209	0.00506329	1.0765	N/A
148471	hsa-miR-152-5p	0.362165	0.0169501	85.5	147	82.5	82.5	77.5	70	19.5	24	15.5	6.5	10	6	19.6667	7.5	0.103723	0.133333	0.0790816	0.0362117	0.0506329	0.0276498	0.105379	0.0381648	0.257771	0.304348
147638	hsv2-miR-H12	0.194187	0.0573474	88	129.5	81	79.5	71.5	68	21	7	12.5	4	2	2	13.5	2.66667	0.111702	0.0388889	0.0637755	0.0222841	0.0101266	0.00921659	0.0714555	0.0138758	0.517933	0.525813
147600	hsa-miR-4292	0.235157	0.328233	137	516	101.5	119	104	108.5	73	397	39	46.5	38.5	44	169.667	43	0.388298	2.20556	0.19898	0.259053	0.194937	0.202765	0.930944	0.218918	1.19008	0.159774
147707	hsa-miR-3154	0.378744	0.0893027	82.5	140.5	76	82	73.5	70.5	19.5	22.5	8.5	8	7	5	16.8333	6.66667	0.103723	0.125	0.0433673	0.0445682	0.035443	0.0230415	0.0906969	0.0343509	0.466903	0.314544
148371	hsa-miR-3620-3p	0.569766	0.182377	120.5	214	110	120	102	95	58.5	90.5	41	44.5	37.5	31.5	63.3333	37.8333	0.31117	0.502778	0.209184	0.247911	0.189873	0.145161	0.341044	0.194315	0.437068	0.265129
148061		0.281566	0.116633	92.5	144.5	79.5	80.5	77	62	29.5	20	12.5	3	9	0	20.6667	4	0.156915	0.111111	0.0637755	0.0167131	0.0455696	N/A	0.110601	0.0311414	0.421081	0.655227
148088		0.0515511	N/A	75.5	125.5	72	74.5	69	64	12.5	9.5	5.5	-1	0.5	-1	9.16667	-0.5	0.0664894	0.0527778	0.0280612	N/A	0.00253165	N/A	0.0491095	0.00253165	0.396562	N/A
148209		0.227461	0.0954113	77.5	130.5	74	78	71	65	14.5	10.5	6.5	0.5	4.5	0	10.5	1.66667	0.0771277	0.0583333	0.0331633	0.00278552	0.0227848	N/A	0.0562081	0.0127852	0.392454	1.1061
148227	hsa-miR-1251-3p	0.425486	0.0413554	87	149	83.5	86.5	79.5	75.5	24.5	28	15.5	7	12.5	11.5	22.6667	10.3333	0.130319	0.155556	0.0790816	0.0389972	0.0632911	0.0529954	0.121652	0.0517612	0.320313	0.23558
148280		0.142958	0.158623	81	194.5	82	78.5	73	69.5	19	67.5	17.5	5	5	6	34.6667	5.33333	0.101064	0.375	0.0892857	0.0278552	0.0253165	0.0276498	0.18845	0.0269405	0.857865	0.052344
148277		0.223465	0.0827865	83.5	141.5	75	74.5	75	65.5	22	14.5	6	2.5	5.5	2	14.1667	3.33333	0.117021	0.0805556	0.0306122	0.0139276	0.0278481	0.00921659	0.076063	0.0169974	0.570308	0.56995
148355		0.709427	0.366238	105	198.5	98	106.5	110.5	95	41.5	69.5	30	32.5	42.5	31	47	35.3333	0.220745	0.386111	0.153061	0.181058	0.21519	0.142857	0.253306	0.179702	0.473295	0.201364
148443		0.397135	0.094312	77	129	75.5	71.5	70.5	66	10.5	5	8.5	-2	3	4	8	1.66667	0.0558511	0.0277778	0.0433673	N/A	0.0151899	0.0184332	0.0423321	0.0168115	0.33226	0.136416
148548		0.662178	0.423853	82	148.5	75.5	88	81	73.5	16	24.5	6	11.5	13	8	15.5	10.8333	0.0851064	0.136111	0.0306122	0.0640669	0.0658228	0.0368664	0.0839432	0.0555853	0.628509	0.292071
148539		0.370183	0.0478041	80.5	137	76	77.5	73	64.5	15.5	13	9.5	4	5.5	-0.5	12.6667	3	0.0824468	0.0722222	0.0484694	0.0222841	0.0278481	N/A	0.0677128	0.0250661	0.257437	0.156958
148190		0.523585	0.504518	98.5	273	81.5	114.5	94.5	109.5	33	145.5	15.5	39.5	25.5	45	64.6667	36.6667	0.175532	0.808333	0.0790816	0.220056	0.129114	0.207373	0.354316	0.185514	1.11803	0.2655
148437		0.211226	N/A	88.5	152	76	74	74	68.5	25	29	6.5	-0.5	0	5	20.1667	1.5	0.132979	0.161111	0.0331633	N/A	N/A	0.0230415	0.109084	0.0230415	0.61638	N/A
148497		0.193025	0.00920169	94.5	149	89	79.5	82.5	69	31	22	18	3.5	6.5	4.5	23.6667	4.83333	0.164894	0.122222	0.0918367	0.0194986	0.0329114	0.0207373	0.126318	0.0243824	0.290539	0.303998
148400		0.219497	0.180493	75.5	131.5	73.5	72.5	72	67	12.5	4.5	5.5	-4.5	3	0.5	7.5	-0.333333	0.0664894	0.025	0.0280612	N/A	0.0151899	0.00230415	0.0398502	0.00874701	0.580196	1.04168
148248		0.921425	0.848673	94	167	151.5	104	111	145.5	29.5	40	83.5	27.5	43	80.5	51	50.3333	0.156915	0.222222	0.42602	0.153203	0.217722	0.370968	0.268386	0.247298	0.523003	0.452307
148163		0.271575	0.027469	87	142.5	79.5	79.5	78.5	66.5	21.5	19	12.5	3.5	10	1.5	17.6667	5	0.114362	0.105556	0.0637755	0.0194986	0.0506329	0.00691244	0.0945643	0.0256813	0.285784	0.876373
148045		0.571564	0.336803	81.5	137	71.5	75.5	72	76	19	11.5	7	-1	6	10	12.5	5	0.101064	0.0638889	0.0357143	N/A	0.0303797	0.0460829	0.066889	0.0382313	0.490034	0.290438
148192	hsa-miR-421	0.243304	0.000535145	81	119.5	82	79.5	74.5	70.5	16.5	-1	17.5	3	4	6	11	4.33333	0.087766	N/A	0.0892857	0.0167131	0.0202532	0.0276498	0.0885258	0.0215387	0.0121392	0.259093
148369		1.20806	0.64871	220.5	157	148.5	185.5	209	155	156	35	83	111	140	91.5	91.3333	114.167	0.829787	0.194444	0.423469	0.618384	0.708861	0.421659	0.482567	0.582968	0.666784	0.251883
148433		0.996654	0.987667	398.5	664.5	439.5	427	473.5	641	331.5	540	373	345	407	577.5	414.833	443.167	1.7633	3	1.90306	1.92201	2.06076	2.66129	2.22212	2.21469	0.30479	0.177427
148424		0.569259	0.162192	98	164	85	92	82	83	33	41	18	20.5	14	21	30.6667	18.5	0.175532	0.227778	0.0918367	0.114206	0.0708861	0.0967742	0.165049	0.0939555	0.415478	0.231994
148198		0.637646	0.190685	122	146	124.5	103	99.5	94.5	58	24	57	30	31.5	30.5	46.3333	30.6667	0.308511	0.133333	0.290816	0.167131	0.159494	0.140553	0.24422	0.155726	0.394879	0.0878705
148399		0.2004	N/A	73.5	122.5	64.5	68.5	67.5	55	9.5	0	-3	-7.5	2	-9	2.16667	-4.83333	0.0505319	N/A	N/A	N/A	0.0101266	N/A	0.0505319	0.0101266	N/A	N/A
148487		0.561082	0.0743289	95.5	156.5	88	92	88.5	80	33.5	35.5	21.5	16	22.5	15	30.1667	17.8333	0.178191	0.197222	0.109694	0.0891365	0.113924	0.0691244	0.161703	0.0907283	0.284689	0.247356
148629		0.302748	0.362544	568	3685	600	538.5	529.5	656.5	503.5	3565.5	532.5	460.5	461.5	592	1533.83	504.667	2.67819	19.8083	2.71684	2.56546	2.33671	2.72811	8.40112	2.54343	1.17591	0.0773087
148169		0.456739	0.0133671	122	177.5	112	92	98	95.5	59.5	56	44	16	31.5	30.5	53.1667	26	0.316489	0.311111	0.22449	0.0891365	0.159494	0.140553	0.28403	0.129728	0.181789	0.280637
148506		0.222258	0.0763612	85	135.5	77.5	71	71.5	67	22	10	14	-1	3.5	4	15.3333	2.16667	0.117021	0.0555556	0.0714286	N/A	0.0177215	0.0184332	0.0813351	0.0180773	0.392301	0.0278371
46264	hsa-miR-298	0.889767	0.511057	118	195.5	111.5	122.5	115.5	131	54.5	69.5	47	48.5	47.5	66	57	54	0.289894	0.386111	0.239796	0.270195	0.240506	0.304147	0.305267	0.271616	0.243587	0.11724
14312		N/A	N/A	71	115	64	62.5	64	55.5	4.5	-14.5	-2.5	-8.5	-7.5	-6.5	-4.16667	-7.5	0.0239362	N/A	N/A	N/A	N/A	N/A	0.0239362	N/A	N/A	N/A
17290		0.838225	0.207178	154.5	244	158	156	152.5	157	91	113.5	89.5	84.5	82.5	93	98	86.6667	0.484043	0.630556	0.456633	0.470752	0.417722	0.428571	0.523744	0.439015	0.178545	0.0638142
42619		0.760821	0.126907	279.5	273	310.5	232	230.5	228.5	215	147.5	243.5	158	159	163.5	202	160.167	1.14362	0.819444	1.24235	0.880223	0.805063	0.753456	1.06847	0.812914	0.207062	0.0784178
42738	hsa-miR-340-3p	0.775514	0.107071	143	215	146	140	124.5	149	80.5	90.5	75	65.5	54.5	82	82	67.3333	0.428191	0.502778	0.382653	0.364903	0.275949	0.37788	0.437874	0.339577	0.138498	0.163392
168631	hsa-miR-4723-5p	0.393772	0.00059826	169	238	180	122.5	114	118	106.5	116	111.5	48	36	54.5	111.333	46.1667	0.566489	0.644444	0.568878	0.267409	0.182278	0.251152	0.59327	0.233613	0.0747282	0.193458
168952	hsa-miR-4781-3p	N/A	N/A	72.5	133	62	68.5	66	58.5	8.5	9	-5	-5.5	-8	-5.5	4.16667	-6.33333	0.0452128	0.05	N/A	N/A	N/A	N/A	0.0476064	N/A	0.0711057	N/A
168564	hsa-miR-548at-5p	1.55054	0.53091	85.5	134.5	73	89.5	74.5	102	21.5	9	5	16	5.5	38.5	11.8333	20	0.114362	0.05	0.0255102	0.0891365	0.0278481	0.177419	0.0632906	0.0981346	0.725108	0.766198
168595	hsa-miR-1185-2-3p	0.988448	0.878858	278.5	285	265	251.5	265	275	212.5	161.5	189.5	177	200.5	208	187.833	195.167	1.13032	0.897222	0.966837	0.986072	1.01519	0.958525	0.998126	0.986596	0.119882	0.0287209
168622	hsa-miR-4652-5p	0.0954636	N/A	75	125	66.5	63	65	64	10	3	0.5	-13	-2.5	0.5	4.5	-5	0.0531915	0.0166667	0.00255102	N/A	N/A	0.00230415	0.0241364	0.00230415	1.08274	N/A
168571	hsa-miR-550b-2-5p	0.710232	0.467662	250.5	160.5	251.5	179	169	160	189	37	185.5	102.5	102	96.5	137.167	100.333	1.00532	0.205556	0.946429	0.571031	0.516456	0.4447	0.719101	0.510729	0.619825	0.124057
168727	hsa-miR-4426	0.681995	0.0556245	105	166.5	102.5	99	96.5	102	41	47.5	36.5	25	27	39	41.6667	30.3333	0.218085	0.263889	0.186224	0.139276	0.136709	0.179724	0.222733	0.151903	0.175278	0.158836
168951	hsa-miR-548as-3p	0.629425	0.344219	168	482	293	193.5	228	253	104	362	225.5	117	161.5	188.5	230.5	155.667	0.553191	2.01111	1.15051	0.651811	0.817722	0.868664	1.23827	0.779399	0.591883	0.145487
168800	hsa-miR-4724-5p	N/A	N/A	74	107.5	72.5	72.5	68.5	61.5	9	-14.5	7.5	-1.5	0	-2.5	0.666667	-1.33333	0.0478723	N/A	0.0382653	N/A	N/A	N/A	0.0430688	N/A	0.157729	N/A
168567	hsa-miR-3177-5p	N/A	N/A	67.5	116	69	69.5	65	61	3.5	-6	5	-4.5	-4	-5	0.833333	-4.5	0.018617	N/A	0.0255102	N/A	N/A	N/A	0.0220636	N/A	0.220917	N/A
168748	hsa-miR-320e	1.34917	0.508323	226	127	239.5	228	220.5	229.5	163	4.5	173.5	153	155.5	164.5	113.667	157.667	0.867021	0.025	0.885204	0.852368	0.787342	0.758065	0.592408	0.799258	0.829621	0.0603906
168655	hsa-miR-5588-5p	0.785771	0.736748	78.5	119	81	74	76	75	14.5	1	15.5	-0.5	9	8.5	10.3333	5.66667	0.0771277	0.00555556	0.0790816	N/A	0.0455696	0.0391705	0.0539216	0.0423701	0.77701	0.106794
168725	hsa-miR-4700-5p	0.327324	0.153874	83.5	128.5	79.5	75	73.5	71	20	5	11.5	0.5	6	6.5	12.1667	4.33333	0.106383	0.0277778	0.0586735	0.00278552	0.0303797	0.0299539	0.0642781	0.0210397	0.616091	0.751438
168691	hsa-miR-3677-5p	N/A	N/A	68.5	105	62.5	63	65	56	3.5	-14	-4	-11	-2.5	-8	-4.83333	-7.16667	0.018617	N/A	N/A	N/A	N/A	N/A	0.018617	N/A	N/A	N/A
168961		N/A	N/A	69.5	111.5	65.5	66	63.5	58.5	4	-6.5	-1	-10.5	-6	-8	-1.16667	-8.16667	0.0212766	N/A	N/A	N/A	N/A	N/A	0.0212766	N/A	N/A	N/A
168626	hsa-miR-4662a-5p	N/A	N/A	71	121.5	59	64	62	58.5	7.5	-4	-3	-13	-4.5	-5.5	0.166667	-7.66667	0.0398936	N/A	N/A	N/A	N/A	N/A	0.0398936	N/A	N/A	N/A
168900	hsa-miR-4721	0.249682	0.097193	87.5	137.5	77.5	79	74.5	68.5	24.5	10.5	8.5	3	4.5	4	14.5	3.83333	0.130319	0.0583333	0.0433673	0.0167131	0.0227848	0.0184332	0.0773399	0.0193104	0.601081	0.162061
168736	hsa-miR-4796-3p	0.391689	0.00916109	88.5	150	82	81.5	80.5	72.5	23	24	17	7.5	10.5	8.5	21.3333	8.83333	0.12234	0.133333	0.0867347	0.0417827	0.0531646	0.0391705	0.114136	0.0447059	0.213417	0.166441
168971	hsa-miR-4449	0.8099	0.0845314	183	222	207.5	163	172.5	177	118.5	96	139	87	101	113	117.833	100.333	0.630319	0.533333	0.709184	0.48468	0.511392	0.520737	0.624279	0.505603	0.141092	0.0370112
168875	hsa-miR-5091	N/A	N/A	76	119.5	69.5	73.5	69	62	11.5	-5	3	-3	-0.5	-1	3.16667	-1.5	0.0611702	N/A	0.0153061	N/A	N/A	N/A	0.0382382	N/A	0.848127	N/A
168999	hsa-miR-4749-3p	0.151901	0.218765	88.5	236	86.5	80.5	82	74	24.5	110	21	4	11.5	10.5	51.8333	8.66667	0.130319	0.611111	0.107143	0.0222841	0.0582278	0.0483871	0.282858	0.0429664	1.00585	0.432312
169139	hsa-miR-5192	0.519425	N/A	77	125.5	75	68	74	61.5	15.5	1.5	8	-6	4.5	-2	8.33333	-1.16667	0.0824468	0.00833333	0.0408163	N/A	0.0227848	N/A	0.0438655	0.0227848	0.846923	N/A
169218	hsa-miR-5189-5p	0.739752	0.623912	78.5	122	73.5	81.5	82.5	69	16.5	-1.5	6	8	13.5	4	7	8.5	0.087766	N/A	0.0306122	0.0445682	0.0683544	0.0184332	0.0591891	0.0437853	0.682791	0.570279
169101	hsa-miR-4469	0.259226	0.107783	74	132.5	69.5	75	70.5	61	11	6.5	5	1	3	-3.5	7.5	0.166667	0.0585106	0.0361111	0.0255102	0.00557103	0.0151899	N/A	0.040044	0.0103805	0.420739	0.655227
169119	hsa-miR-4786-3p	N/A	N/A	67	117.5	67	65.5	62	57.5	5	-9.5	-2	-7.5	-7.5	-6	-2.16667	-7	0.0265957	N/A	N/A	N/A	N/A	N/A	0.0265957	N/A	N/A	N/A
169367	hsa-miR-4444	0.561119	N/A	81	102.5	70.5	70.5	72.5	66	17	-22.5	3.5	-3	6	0	-0.666667	1	0.0904255	N/A	0.0178571	N/A	0.0303797	N/A	0.0541413	0.0303797	0.947771	N/A
169087	hsa-miR-149-3p	0.96431	0.894415	377	764.5	473	543	448.5	609.5	314	641.5	405.5	467.5	380	545.5	453.667	464.333	1.67021	3.56389	2.06888	2.60446	1.92405	2.51382	2.43433	2.34744	0.410106	0.157388
169081	hsa-miR-4707-3p	0.31207	0.0329353	87	155	86.5	79.5	78.5	75.5	22.5	32.5	17.5	4.5	9.5	10.5	24.1667	8.16667	0.119681	0.180556	0.0892857	0.0250696	0.0481013	0.0483871	0.129841	0.0405193	0.357942	0.330227
169033	hsa-miR-5680	N/A	N/A	72.5	116.5	65	69.5	64.5	59	9	0.5	-2	-5	-3	-3.5	2.5	-3.83333	0.0478723	0.00277778	N/A	N/A	N/A	N/A	0.0253251	N/A	1.2591	N/A
169027	hsa-miR-3973	N/A	N/A	61	100	55.5	61	56.5	56	-2.5	-19	-13	-16	-12	-8	-11.5	-12	N/A	N/A	N/A	N/A	N/A	N/A	N/A	N/A	N/A	N/A
169004	hsa-miR-4798-5p	N/A	N/A	75	120.5	66	64	64.5	59.5	11	1.5	-0.5	-8.5	-3.5	-5	4	-5.66667	0.0585106	0.00833333	N/A	N/A	N/A	N/A	0.033422	N/A	1.0616	N/A
169055	hsa-miR-3529-5p	0.343562	0.0359017	79.5	126	78.5	75.5	72.5	69.5	15	9	12	-3	5	4	12	2	0.0797872	0.05	0.0612245	N/A	0.0253165	0.0184332	0.0636706	0.0218748	0.236271	0.222503
169255	hsa-miR-4708-5p	N/A	N/A	73	119.5	66	72	65.5	57.5	7.5	0	3.5	-4.5	-4	-4	3.66667	-4.16667	0.0398936	N/A	0.0178571	N/A	N/A	N/A	0.0288754	N/A	0.539634	N/A
169359	hsa-miR-3160-5p	N/A	N/A	74	115.5	66.5	71	67.5	64	11.5	-5	0.5	-5.5	-1.5	-0.5	2.33333	-2.5	0.0611702	N/A	0.00255102	N/A	N/A	N/A	0.0318606	N/A	1.30098	N/A
169141	hsa-miR-4423-3p	0.663425	0.540135	78.5	128	78.5	76	77.5	70.5	16	3	12.5	0	9	6	10.5	5	0.0851064	0.0166667	0.0637755	N/A	0.0455696	0.0276498	0.0551829	0.0366097	0.634611	0.346117
169048	hsa-miR-4736	0.407957	N/A	75	118	68	74.5	69.5	62	10.5	-1	0	-1.5	4.5	-2.5	3.16667	0.166667	0.0558511	N/A	N/A	N/A	0.0227848	N/A	0.0558511	0.0227848	N/A	N/A
168997	hsa-miR-5584-5p	0.499327	0.363704	81.5	107	78	76.5	79.5	65	17	-13	10.5	2	12	-1.5	4.83333	4.16667	0.0904255	N/A	0.0535714	0.0111421	0.0607595	N/A	0.0719985	0.0359508	0.361949	0.975913
169273	hsa-miR-548ar-3p	N/A	N/A	67.5	117.5	65	69.5	60	59.5	5.5	-6	1.5	-5	-6	-6	0.333333	-5.66667	0.0292553	N/A	0.00765306	N/A	N/A	N/A	0.0184542	N/A	0.827731	N/A
169303	hsa-miR-378g	0.190989	0.0089063	101	116.5	95.5	77.5	74	75	37.5	-9.5	29.5	2	8.5	10	19.1667	6.83333	0.199468	N/A	0.15051	0.0111421	0.043038	0.0460829	0.174989	0.033421	0.197832	0.5791
169138	hsa-miR-4504	0.527782	0.207991	82.5	132	88	81	81.5	69	18	6.5	18	4	13	6.5	14.1667	7.83333	0.0957447	0.0361111	0.0918367	0.0222841	0.0658228	0.0299539	0.0745642	0.0393536	0.447381	0.590582
168556		0.559967	0.231156	324	508	797.5	238.5	303	488.5	261.5	386.5	730	163.5	236.5	425	459.333	275	1.39096	2.14722	3.72449	0.910864	1.19747	1.95853	2.42089	1.35562	0.4918	0.399404
169104		0.807004	0.620812	389.5	203.5	480.5	296	253.5	344	327	79.5	409	219	183.5	281	271.833	227.833	1.73936	0.441667	2.08673	1.22006	0.929114	1.29493	1.42259	1.14803	0.609506	0.168332
169290		3.21682	0.0177322	117	147.5	146	194.5	288	237.5	53.5	24.5	73.5	118.5	219.5	171	50.5	169.667	0.284574	0.136111	0.375	0.660167	1.11139	0.788018	0.265229	0.853193	0.454754	0.272583
169146		N/A	N/A	67.5	116.5	65	68	65.5	61	3.5	-6.5	0.5	-9	-1.5	-6.5	-0.833333	-5.66667	0.018617	N/A	0.00255102	N/A	N/A	N/A	0.010584	N/A	1.07335	N/A
169420	hsa-miR-193b-5p	0.851472	0.09856	150	204	138	147	134	142.5	87.5	80	76	72.5	67	78.5	81.1667	72.6667	0.465426	0.444444	0.387755	0.4039	0.339241	0.361751	0.432542	0.368297	0.0928927	0.0891206
169403		1.02736	0.915226	2562.5	4332	2442	3640.5	3164	3228.5	2497	4210	2374	3566	3095	3164	3027	3275	13.2819	23.3889	12.1122	19.8663	15.6709	14.5806	16.261	16.7059	0.381314	0.167049
169408	hsa-miR-181d-5p	0.884819	0.753323	263	615.5	284.5	309	348.5	408	200	490.5	213	234.5	280	345	301.167	286.5	1.06383	2.725	1.08673	1.30641	1.41772	1.58986	1.62519	1.438	0.586107	0.0993125
168762		1.0005	0.997929	83.5	149.5	87.5	98.5	85.5	90.5	17.5	25.5	17.5	19.5	18	27	20.1667	21.5	0.0930851	0.141667	0.0892857	0.108635	0.0911392	0.124424	0.108012	0.108066	0.270406	0.154069
17313		0.303493	0.0114893	83	141	82.5	76	72.5	73.5	18.5	20	16.5	-2.5	4	8.5	18.3333	3.33333	0.0984043	0.111111	0.0841837	N/A	0.0202532	0.0391705	0.0978997	0.0297118	0.137598	0.450211
42576	hsa-miR-342-5p	0.829689	0.630656	108.5	202	158	123	105	179	46	76.5	90.5	44.5	34.5	112	71	63.6667	0.244681	0.425	0.461735	0.247911	0.174684	0.516129	0.377139	0.312908	0.308038	0.574492
46869	hsa-miR-1258	1.36962	0.358955	189.5	147.5	179	204	199.5	187	127	26.5	110	122.5	129	121.5	87.8333	124.333	0.675532	0.147222	0.561224	0.682451	0.653165	0.559908	0.461326	0.631841	0.602527	0.101282
46429		0.30196	0.0485573	81	134	82	83	80	67.5	16	14	12	0	8	1	14	3	0.0851064	0.0777778	0.0612245	N/A	0.0405063	0.00460829	0.0747029	0.0225573	0.163772	1.1253
42933		0.490462	0.0041192	92.5	144	95.5	83.5	86.5	85	28.5	25	26.5	8.5	15.5	18	26.6667	14	0.151596	0.138889	0.135204	0.0473538	0.078481	0.0829493	0.141896	0.0695947	0.0606055	0.278618
11004	hsa-miR-203a	1.66004	0.246397	470	204	209	390.5	485	442.5	405.5	85	139	307	414.5	376	209.833	365.833	2.15691	0.472222	0.709184	1.71031	2.09873	1.73272	1.11277	1.84725	0.819557	0.118055
19588	hsa-miR-17-3p	1.21454	0.72927	96	131.5	101.5	88	101.5	113.5	31.5	4	32	9.5	31	47.5	22.5	29.3333	0.167553	0.0222222	0.163265	0.0529248	0.156962	0.218894	0.11768	0.142927	0.702725	0.586804
46732	hsa-miR-1264	1.87692	0.0389732	5859	2368.5	6180.5	9764	8736	9177	5791.5	2248.5	6108	9680	8658.5	9111.5	4716	9150	30.8059	12.4917	31.1633	53.9276	43.8405	41.9885	24.8203	46.5855	0.430228	0.137929
29328	hsa-miR-582-3p	N/A	N/A	73	113	66.5	69.5	65	59.5	5.5	-4	-9	-8	-9	-8.5	-2.5	-8.5	0.0292553	N/A	N/A	N/A	N/A	N/A	0.0292553	N/A	N/A	N/A
42574		0.465556	0.0481937	82.5	135.5	107.5	90.5	86	81.5	16	18	28.5	11	6	13.5	20.8333	10.1667	0.0851064	0.1	0.145408	0.0612813	0.0303797	0.062212	0.110172	0.051291	0.285113	0.353194
46802		0.916483	0.180809	59873.5	65535	65535	59798	59758	64317	59809.5	65418.5	65458.5	59718	59636.5	64249.5	63562.2	61201.3	318.136	363.436	333.972	332.691	301.957	296.081	338.515	310.243	0.0679124	0.063374
42622	hsa-miR-579-3p	N/A	N/A	76	120	74.5	74	70.5	64.5	10	-7	-3.5	-2.5	-6.5	-4.5	-0.166667	-4.5	0.0531915	N/A	N/A	N/A	N/A	N/A	0.0531915	N/A	N/A	N/A
42907		0.574996	0.63094	82	123	83	81.5	78	65.5	17	4	2	3	6	-3	7.66667	2	0.0904255	0.0222222	0.0102041	0.0167131	0.0303797	N/A	0.0409506	0.0235464	1.05654	0.410414
46404	hsa-miR-1244	0.247686	0.0293287	84.5	144	93.5	80.5	79	69	20	24.5	13	6.5	7.5	0.5	19.1667	4.83333	0.106383	0.136111	0.0663265	0.0362117	0.0379747	0.00230415	0.10294	0.0254968	0.340192	0.788521
17875	hsa-miR-500a-5p	0.803422	0.320088	148.5	186.5	140	118.5	127.5	158.5	84.5	69.5	61.5	44.5	51.5	90	71.8333	62	0.449468	0.386111	0.313776	0.247911	0.260759	0.414747	0.383118	0.307806	0.177219	0.301606
42835		0.377422	0.0875947	89	162	94.5	88	86	83.5	26	48.5	22.5	12.5	12	14.5	32.3333	13	0.138298	0.269444	0.114796	0.0696379	0.0607595	0.0668203	0.174179	0.0657392	0.478441	0.0690128
42916		0.846539	0.622517	82	143	86	86.5	93	99	20	29	18	9.5	20.5	32	22.3333	20.6667	0.106383	0.161111	0.0918367	0.0529248	0.103797	0.147465	0.119777	0.101396	0.304966	0.466647
42572	hsa-miR-154-3p	0.927639	0.78475	130	149.5	154.5	116	154.5	138.5	67	36.5	85	39	73	72.5	62.8333	61.5	0.356383	0.202778	0.433673	0.21727	0.36962	0.334101	0.330945	0.306997	0.355138	0.259642
33177		0.363727	0.0899464	80	146.5	86	82	84	74	16.5	34	17.5	5.5	12.5	8.5	22.6667	8.83333	0.087766	0.188889	0.0892857	0.0306407	0.0632911	0.0391705	0.12198	0.0443674	0.475074	0.381682
42646		2.72014	0.0108982	128.5	170	81	201	200.5	201.5	66	58	12.5	127	132	136.5	45.5	131.833	0.351064	0.322222	0.0637755	0.707521	0.668354	0.629032	0.245687	0.668303	0.643903	0.0587224
17378		0.258951	0.0321724	98	176	97	84	83.5	79	34.5	57	30.5	7.5	13	13.5	40.6667	11.3333	0.183511	0.316667	0.155612	0.0417827	0.0658228	0.062212	0.218597	0.0566058	0.393735	0.229014
29577	hsa-miR-374a-3p	0.462344	0.0789318	83.5	132.5	89	79	78	79	18	13	17	1.5	7.5	15.5	16	8.16667	0.0957447	0.0722222	0.0867347	0.00835655	0.0379747	0.0714286	0.0849005	0.0392533	0.139787	0.803893
46625	hsa-miR-1303	0.415603	0.00826607	84	139	87.5	81	79.5	72	20	14	19.5	5	10.5	8	17.8333	7.83333	0.106383	0.0777778	0.0994898	0.0278552	0.0531646	0.0368664	0.0945502	0.0392954	0.157891	0.32646
10995	hsa-miR-199a-3p/hsa-miR-199b-3p	0.894613	0.681553	6490	4984	10974.5	5113	7955	8001	6425.5	4866	10904.5	5033.5	7885	7935	7398.67	6951.17	34.1782	27.0333	55.6352	28.0418	39.9241	36.5668	38.9489	34.8442	0.382187	0.175799
42880		0.999935	0.999775	268	452	353	355	273.5	454.5	204	331	278.5	274	203	388.5	271.167	288.5	1.08511	1.83889	1.42092	1.52646	1.02785	1.79032	1.4483	1.44821	0.260744	0.267374
27549	hsa-miR-548d-3p	0.0609295	0.156234	82	130	77	80	75.5	66	19.5	7	6.5	-1	0.5	1	11	0.166667	0.103723	0.0388889	0.0331633	N/A	0.00253165	0.00460829	0.0585919	0.00356997	0.66886	0.411324
17552		0.84223	0.513569	133.5	202	140.5	127	117.5	170	66.5	83	66	47.5	46	102.5	71.8333	65.3333	0.353723	0.461111	0.336735	0.264624	0.232911	0.47235	0.383856	0.323295	0.175695	0.402281
42915		0.251173	0.0560711	79.5	145	86	80.5	75	72	12.5	21.5	14.5	-3.5	4.5	4.5	16.1667	1.83333	0.0664894	0.119444	0.0739796	N/A	0.0227848	0.0207373	0.0866378	0.0217611	0.33077	0.0665312
11182	hsa-miR-98-5p	1.13909	0.818579	874	310	2286.5	1425.5	1439	1059.5	808	189.5	2216	1341.5	1367.5	993	1071.17	1234	4.29787	1.05278	11.3061	7.47354	6.92405	4.57604	5.55226	6.32454	0.943851	0.243333
27536	hsa-miR-190a-5p	1.20887	0.515996	203	238.5	275.5	178.5	293	327	138	113	197	99	220	259.5	149.333	192.833	0.734043	0.627778	1.0051	0.551532	1.11392	1.19585	0.788974	0.95377	0.246608	0.367749
42837	hsa-miR-577	0.780682	0.644335	81.5	126.5	86.5	86	86.5	73.5	14.5	1.5	11.5	8.5	6.5	7	9.16667	7.33333	0.0771277	0.00833333	0.0586735	0.0473538	0.0329114	0.0322581	0.0480448	0.0375077	0.74113	0.227504
46788	hsa-miR-1299	0.583649	0.193479	150	261.5	146.5	135.5	129.5	132	84	141.5	63.5	57	58.5	64	96.3333	59.8333	0.446809	0.786111	0.32398	0.317549	0.296203	0.294931	0.518966	0.302894	0.461238	0.0419528
11061	hsa-miR-329-3p	0.719517	0.108254	132.5	177.5	155	115	126.5	142	70	57.5	87.5	37.5	54.5	72.5	71.6667	54.8333	0.37234	0.319444	0.446429	0.208914	0.275949	0.334101	0.379404	0.272988	0.168122	0.229484
17349	hsa-miR-595	0.374551	0.0307907	100	172.5	100	89	85.5	87.5	38	52	29.5	12.5	15.5	20	39.8333	16	0.202128	0.288889	0.15051	0.0696379	0.078481	0.0921659	0.213842	0.0800949	0.327013	0.141712
42647		1.06065	0.86408	130.5	137	141	136.5	139	119	67	18.5	73.5	58.5	63.5	51.5	53	57.8333	0.356383	0.102778	0.375	0.325905	0.321519	0.237327	0.278054	0.294917	0.546939	0.169277
16681		0.455321	0.0161131	117	176.5	115.5	98.5	101.5	95.5	53	65.5	46	21	31.5	27	54.8333	26.5	0.281915	0.363889	0.234694	0.116992	0.159494	0.124424	0.293499	0.133636	0.222733	0.169859
46766	hsa-miR-1208	0.18037	0.011725	80	122	80	77	77	65.5	15.5	10.5	14.5	1	4	-0.5	13.5	1.5	0.0824468	0.0583333	0.0739796	0.00557103	0.0202532	N/A	0.0715866	0.0129121	0.170892	0.804039
42642		0.529075	N/A	73	121.5	73.5	73	79.5	66.5	9	12	8.5	-2	5.5	-0.5	9.83333	1	0.0478723	0.0666667	0.0433673	N/A	0.0278481	N/A	0.0526355	0.0278481	0.234792	N/A
46320	hsa-miR-31-3p	0.619582	0.107156	410.5	440.5	645.5	265	393.5	377	347	331	578.5	189	321.5	310.5	418.833	273.667	1.84574	1.83889	2.95153	1.05292	1.62785	1.43088	2.21205	1.37055	0.289511	0.213178
11065	hsa-miR-335-5p	7.07509	0.00488153	104	167	117	299.5	438	531.5	41.5	50.5	47.5	223	371	464.5	46.5	352.833	0.220745	0.280556	0.242347	1.24234	1.87848	2.14055	0.247882	1.75379	0.122184	0.263376
10925	hsa-miR-10b-5p	0.911325	0.617253	993	688.5	1130	726	883	1069.5	933	572.5	1063.5	652.5	811.5	1003	856.333	822.333	4.96277	3.18056	5.42602	3.6351	4.10886	4.62212	4.52311	4.12203	0.262106	0.119757
42830		0.425162	0.0840728	88.5	142.5	76.5	86.5	79.5	72	26	19	11.5	8.5	11.5	5	18.8333	8.33333	0.138298	0.105556	0.0586735	0.0473538	0.0582278	0.0230415	0.100842	0.0428744	0.396866	0.4202
46872	hsa-miR-1262	0.383456	0.0613455	87.5	153.5	82.5	84	82	73.5	25.5	32.5	14.5	9	11	9.5	24.1667	9.83333	0.135638	0.180556	0.0739796	0.0501393	0.0556962	0.0437788	0.130058	0.0498714	0.411407	0.119572
21702	hsa-miR-219a-1-3p	0.452372	0.00399601	83.5	141.5	94	87.5	80.5	75.5	20	18	24	10.5	11	7.5	20.6667	9.66667	0.106383	0.1	0.122449	0.0584958	0.0556962	0.0345622	0.109611	0.0495847	0.105531	0.263891
46246	hsa-miR-1226-5p	0.284271	0.0569456	82	137.5	76.5	80.5	77.5	67	18	17	9	3	9.5	0.5	14.6667	4.33333	0.0957447	0.0944444	0.0459184	0.0167131	0.0481013	0.00230415	0.0787025	0.0223728	0.360844	1.04668
42594		0.291449	0.0414624	90	163	89	88.5	80	70	26	39	19.5	11.5	8.5	5.5	28.1667	8.5	0.138298	0.216667	0.0994898	0.0640669	0.043038	0.0253456	0.151485	0.0441501	0.39404	0.43906
42946		N/A	N/A	73	113.5	79	67.5	67.5	63	7	-9.5	7	-13	-4.5	-2.5	1.5	-6.66667	0.037234	N/A	0.0357143	N/A	N/A	N/A	0.0364742	N/A	0.0294628	N/A
46640	hsa-miR-1257	0.452301	0.0681979	82.5	131.5	83.5	76.5	79.5	71	13.5	9	9.5	-4	6.5	4	10.6667	2.16667	0.0718085	0.05	0.0484694	N/A	0.0329114	0.0184332	0.0567593	0.0256723	0.230014	0.398782
42670		0.613021	0.0489247	124.5	159.5	128.5	102	104.5	107.5	59	37.5	47	22.5	32	39	47.8333	31.1667	0.31383	0.208333	0.239796	0.125348	0.162025	0.179724	0.253986	0.155699	0.213243	0.178127
11022	hsa-miR-221-3p	0.98615	0.938571	13043.5	7966.5	15008.5	9842	13264	14166.5	12979	7841	14928	9762.5	13191.5	14098	11916	12350.7	69.0372	43.5611	76.1633	54.3872	66.7924	64.9677	62.9205	62.0491	0.27241	0.107944
30768		0.388616	0.0160587	99.5	161.5	99	89.5	88.5	81	30.5	37.5	24	10.5	14	13.5	30.6667	12.6667	0.162234	0.208333	0.122449	0.0584958	0.0708861	0.062212	0.164339	0.0638646	0.261538	0.0995591
42627	hsa-miR-212-3p	0.440945	0.00321377	108	167.5	119	94	90.5	95	44.5	43.5	39	15	17	28	42.3333	20	0.236702	0.241667	0.19898	0.0835655	0.0860759	0.129032	0.225783	0.0995579	0.103394	0.256699
45745	hsa-miR-302f	0.165857	0.00797336	83.5	144	82	81	77.5	70	19	23	14	1.5	5	3.5	18.6667	3.33333	0.101064	0.127778	0.0714286	0.00835655	0.0253165	0.016129	0.10009	0.0166007	0.281619	0.511412
10936	hsa-miR-130b-3p	0.780519	0.109722	230	273	262.5	177	206	251.5	165	151.5	191	99	137.5	185.5	169.167	140.667	0.87766	0.841667	0.97449	0.551532	0.696203	0.854839	0.897939	0.700858	0.0765024	0.216459
42555		1.29227	0.311041	146	165.5	115.5	161	154.5	136.5	82.5	46	46.5	84.5	82	69	58.3333	78.5	0.43883	0.255556	0.237245	0.470752	0.41519	0.317972	0.310543	0.401305	0.35897	0.192698
17851	hsa-miR-200c-5p	0.640324	0.162371	125.5	175	97.5	107.5	107.5	103.5	62	57.5	30.5	31	34	37	50	34	0.329787	0.319444	0.155612	0.172702	0.172152	0.170507	0.268281	0.171787	0.364212	0.00664851
42906	ebv-miR-BHRF1-1	0.609158	0.484363	240.5	799	251	335	286	269	177.5	683.5	185	257	216	203.5	348.667	225.5	0.944149	3.79722	0.943878	1.43175	1.09367	0.937788	1.89508	1.1544	0.86925	0.218746
42730	hsa-miR-423-3p	0.722646	0.054074	602.5	624.5	634.5	365.5	465	632.5	538.5	506.5	568	288	392	566	537.667	415.333	2.86436	2.81389	2.89796	1.60446	1.98481	2.60829	2.85874	2.06585	0.0148025	0.245324
42489		0.133447	N/A	80	127	78	75.5	72.5	66.5	18	9.5	11.5	0	-4	2	13	-0.666667	0.0957447	0.0527778	0.0586735	N/A	N/A	0.00921659	0.0690653	0.00921659	0.33725	N/A
17825	hsa-miR-338-5p	0.887713	0.808518	137.5	341	169.5	186	142	271.5	76	226	103.5	112	71.5	207.5	135.167	130.333	0.404255	1.25556	0.528061	0.623955	0.362025	0.956221	0.729291	0.647401	0.630672	0.459979
146027		0.41504	0.0705318	81.5	131.5	83.5	78	82	70	20.5	14.5	14	3	14	4.5	16.3333	7.16667	0.109043	0.0805556	0.0714286	0.0167131	0.0708861	0.0207373	0.0870089	0.0361122	0.225492	0.835791
146109	hsa-miR-1910-5p	0.308059	0.0212861	74	123	80	80.5	73	66	13	10	11.5	7	3	0.5	11.5	3.5	0.0691489	0.0555556	0.0586735	0.0389972	0.0151899	0.00230415	0.061126	0.0188304	0.116494	0.988585
19004		1.09633	0.182098	15570.5	17376.5	17783	17279.5	18504.5	22942.5	15507.5	17254.5	17713.5	17203	18435	22877.5	16825.2	19505.2	82.4867	95.8583	90.375	95.8384	93.3418	105.426	89.5733	98.2022	0.075042	0.0649638
146221		0.81212	0.563974	189	455	281	232	260.5	311.5	125.5	337.5	214.5	154.5	189	246.5	225.833	196.667	0.667553	1.875	1.09439	0.860724	0.956962	1.13594	1.21231	0.984544	0.505068	0.141861
11279	RNU6-1_RNU6-2	0.656042	0.263235	4097.5	10123	7109	4221.5	4830.5	5905.5	4032	10004	7041.5	4144	4760.5	5839.5	7025.83	4914.67	21.4468	55.5778	35.926	23.0864	24.1038	26.9101	37.6502	24.7001	0.454996	0.0801782
17955		0.91962	0.795869	510	295.5	668	451	434	501.5	445.5	175	603	371	363	433.5	407.833	389.167	2.36968	0.972222	3.07653	2.06685	1.83797	1.9977	2.13948	1.96751	0.500531	0.0596629
27833	spike_control_v2_27	0.702075	0.207631	2071	1058.5	1737	1038.5	1280	1299.5	2006.5	934	1668.5	953	1209	1233	1536.33	1131.67	10.6729	5.18889	8.51276	5.30919	6.12152	5.68203	8.12484	5.70425	0.340006	0.0712836
13389	spike_control_v2_6	1.04587	0.923054	350	151	314	289.5	305	228.5	288.5	31.5	243	209.5	234	159	187.667	200.833	1.53457	0.175	1.2398	1.16713	1.18481	0.732719	0.983123	1.02822	0.727485	0.249036
146104		0.262119	0.158011	86	134.5	88	76	75	71	18.5	19	6	-2	4	4.5	14.5	2.16667	0.0984043	0.105556	0.0306122	N/A	0.0202532	0.0207373	0.0781907	0.0204952	0.52895	0.0167041
24163	spike_control_v2_13	0.814201	0.370504	2342	1243.5	1968.5	1384	1689.5	1663.5	2275.5	1126	1891.5	1302.5	1617.5	1597	1764.33	1505.67	12.1037	6.25556	9.65051	7.25627	8.18987	7.35945	9.3366	7.60186	0.314536	0.0673307
29564	spike_control_v2_45	0.762485	0.273669	1854.5	999	1515	1012.5	1139.5	1364	1788	879	1439	930.5	1068.5	1297.5	1368.67	1098.83	9.51064	4.88333	7.34184	5.18384	5.41013	5.97926	7.24527	5.52441	0.319541	0.074187
146046	jcv-miR-J1-5p	0.388385	0.031177	85	136	83	84.5	78	73	19	13	11	5	8	4.5	14.3333	5.83333	0.101064	0.0722222	0.0561224	0.0278552	0.0405063	0.0207373	0.0764695	0.0296996	0.297762	0.337134
19606	SNORD12	0.604117	0.179326	117.5	234.5	188	113.5	129.5	152.5	52	114	114	40	57.5	84	93.3333	60.5	0.276596	0.633333	0.581633	0.222841	0.291139	0.387097	0.497187	0.300359	0.387739	0.274721
146196	hsa-miR-711	1.1508	0.752833	665.5	192	736	628.5	674.5	483.5	601.5	71.5	666	554.5	601.5	415.5	446.333	523.833	3.19947	0.397222	3.39796	3.08914	3.04557	1.91475	2.33155	2.68315	0.719742	0.248146
146015		0.4764	0.0419935	88.5	134.5	88	82	83	77.5	24	15	17	5	12.5	11	18.6667	9.5	0.12766	0.0833333	0.0867347	0.0278552	0.0632911	0.0506912	0.0992425	0.0472792	0.248569	0.379929
145991		0.58966	0.394163	1271	6282.5	3288.5	1798.5	2627	2477.5	1210	6159.5	3217	1722.5	2557	2410.5	3528.83	2230	6.43617	34.2194	16.4133	9.5961	12.9468	11.1083	19.023	11.2171	0.739858	0.149595
42839	hsa-miR-135a-5p	0.40929	0.0359314	98	152	91	89.5	84	80	35	38	21.5	16	12	12.5	31.5	13.5	0.18617	0.211111	0.109694	0.0891365	0.0607595	0.0576037	0.168992	0.0691666	0.312713	0.251079
146103	hsa-miR-1913	0.716942	0.0604893	209.5	288.5	212	180	204.5	179.5	146	176	139	105	130	113.5	153.667	116.167	0.776596	0.977778	0.709184	0.584958	0.658228	0.523041	0.821186	0.588743	0.170167	0.114944
28444	spike_control_v2_33	0.638879	0.0453806	7941	5373.5	5820.5	3850	4308	4782	7877	5259.5	5751.5	3773	4234.5	4714	6296	4240.5	41.8989	29.2194	29.3444	21.0195	21.4405	21.7235	33.4876	21.3945	0.217535	0.016558
146149	hsv2-miR-H2	0.170518	N/A	76.5	122	74.5	74	72	69	15.5	7	8	-1	-3	2	10.1667	-0.666667	0.0824468	0.0388889	0.0408163	N/A	N/A	0.00921659	0.0540507	0.00921659	0.455325	N/A
145686	hsa-miR-548c-3p	0.207342	N/A	74	120	72	70.5	71.5	58.5	14	7	6.5	-6.5	2	-7.5	9.16667	-4	0.0744681	0.0388889	0.0331633	N/A	0.0101266	N/A	0.0488401	0.0101266	0.458197	N/A
145819	hsa-miR-520c-3p	0.240917	0.229313	80.5	120	77.5	73	74.5	68.5	19.5	4	11	0	3.5	2.5	11.5	2	0.103723	0.0222222	0.0561224	N/A	0.0177215	0.0115207	0.0606894	0.0146211	0.674617	0.299882
146076		0.955354	0.6011	456.5	583	533	520	495.5	530	395.5	470.5	466.5	446.5	427	462.5	444.167	445.333	2.10372	2.61389	2.3801	2.48747	2.16203	2.13134	2.3659	2.26028	0.107941	0.0873121
145703		0.503564	0.0442184	80.5	139	81.5	84.5	77.5	77.5	16.5	23.5	15	9	8.5	12	18.3333	9.83333	0.087766	0.130556	0.0765306	0.0501393	0.043038	0.0552995	0.098284	0.0494923	0.290047	0.12439
145724	hsa-miR-887-3p	0.841681	0.662994	92.5	156	81	104.5	91.5	85	26.5	37	11.5	26	21	19.5	25	22.1667	0.140957	0.205556	0.0586735	0.144847	0.106329	0.0898618	0.135062	0.113679	0.54507	0.248241
145753	hsa-miR-484	0.439126	0.173114	123.5	236.5	108	111.5	98.5	102	56	114	41.5	33.5	29.5	36	70.5	33	0.297872	0.633333	0.211735	0.18663	0.149367	0.165899	0.38098	0.167298	0.58467	0.111601
145974	hsa-miR-200b-5p	0.410471	0.00440933	84	138.5	87.5	79	80.5	73	21	20	19	-1.5	10	8	20	5.5	0.111702	0.111111	0.0969388	N/A	0.0506329	0.0368664	0.106584	0.0437496	0.0784193	0.222503
145839	hsa-miR-662	0.649917	N/A	78.5	125	70	74	76.5	66	13.5	2.5	0	-3.5	5.5	-2	5.33333	0	0.0718085	0.0138889	N/A	N/A	0.0278481	N/A	0.0428487	0.0278481	0.955813	N/A
145826	hsa-miR-18b-3p	0.132493	0.304238	99	365	89	93	83.5	78	36.5	237	17.5	14	16	11.5	97	13.8333	0.194149	1.31667	0.0892857	0.0779944	0.0810127	0.0529954	0.533367	0.0706675	1.27563	0.217621
145976	hsa-miR-663b	0.943219	0.831055	89	133	96	96.5	81.5	86	22	9	20.5	18	13.5	19	17.1667	16.8333	0.117021	0.05	0.104592	0.100279	0.0683544	0.0875576	0.0905377	0.0853969	0.393786	0.188196
147998		N/A	N/A	70	108.5	71.5	71	68.5	58	3.5	-14	0.5	-8.5	-3	-9	-3.33333	-6.83333	0.018617	N/A	0.00255102	N/A	N/A	N/A	0.010584	N/A	1.07335	N/A
147816	hsa-miR-3162-5p	0.640399	0.0683692	85	139	89.5	94	84	77	19.5	19.5	14	12.5	13	10	17.6667	11.8333	0.103723	0.108333	0.0714286	0.0696379	0.0658228	0.0460829	0.0944951	0.0605145	0.212802	0.208923
147819	hsa-miR-3117-3p	0.538768	0.210238	83.5	123.5	81	86.5	81	72.5	18	5	13.5	6	7.5	7	12.1667	6.83333	0.0957447	0.0277778	0.0688776	0.0334262	0.0379747	0.0322581	0.0641333	0.034553	0.533746	0.0874106
147871	hsa-miR-3180-5p	0.31128	0.261086	95	229	97	95.5	96.5	86	30	109	24	15	23.5	16	54.3333	18.1667	0.159574	0.605556	0.122449	0.0835655	0.118987	0.0737327	0.29586	0.0920952	0.908695	0.258456
147683	hsa-miR-3188	0.427118	0.141636	85.5	139.5	86	72.5	83.5	73	20	23	14	-3	14	3.5	19	4.83333	0.106383	0.127778	0.0714286	N/A	0.0708861	0.016129	0.101863	0.0435076	0.279249	0.889939
147809	hsa-miR-514b-3p	0.567198	0.126415	101.5	140	92.5	88.5	86	82.5	38	18	23.5	13	17.5	17	26.5	15.8333	0.202128	0.1	0.119898	0.0724234	0.0886076	0.078341	0.140675	0.0797907	0.384868	0.10263
147990		7.44145	N/A	71.5	119.5	73.5	73	68	108	7	2	6	-8	-1	42.5	5	11.1667	0.037234	0.0111111	0.0306122	N/A	N/A	0.195853	0.0263191	0.195853	0.515986	N/A
147512		0.935871	0.818199	8630	5630	14585.5	7617.5	10402	10116.5	8565.5	5514.5	14518.5	7539.5	10331.5	10051.5	9532.83	9307.5	45.5612	30.6361	74.074	42.0028	52.3114	46.3203	50.0904	46.8782	0.440609	0.110433
147912		0.277311	0.0553823	87	130	84.5	81	75	73.5	22	12.5	9.5	4.5	2	6.5	14.6667	4.33333	0.117021	0.0694444	0.0484694	0.0250696	0.0101266	0.0299539	0.0783117	0.0217167	0.448536	0.475678
147805	hsa-miR-3183	1.09797	0.75442	139.5	210.5	128.5	172	126	185.5	77	98.5	52	95	54	117	75.8333	88.6667	0.409574	0.547222	0.265306	0.529248	0.273418	0.539171	0.407368	0.447279	0.346054	0.336814
147913		0.954205	0.471099	65535	65535	65535	65535	65535	65535	65472	65422.5	65465.5	65458.5	65464.5	65468	65453.3	65463.7	348.255	363.458	334.008	364.671	331.466	301.696	348.574	332.611	0.042252	0.0947153
147812		0.409263	0.278457	278.5	2102	1438.5	288	520	1015	217	1987	1372	215	452	948	1192	538.333	1.15426	11.0389	7	1.19777	2.28861	4.36866	6.39771	2.61835	0.776803	0.615257
147852	hsa-miR-4295	0.455213	0.03079	92.5	128	94	83.5	84	82.5	29.5	17	30	7.5	14	15.5	25.5	12.3333	0.156915	0.0944444	0.153061	0.0417827	0.0708861	0.0714286	0.134807	0.0613658	0.25969	0.276402
147882	hsa-miR-2909	0.368785	0.0435742	68	117	74	76	73.5	66	7.5	5.5	9	1.5	4	0	7.33333	1.83333	0.0398936	0.0305556	0.0459184	0.00835655	0.0202532	N/A	0.0387892	0.0143049	0.199559	0.588065
147866	hsa-miR-3134	0.71152	0.5932	75.5	125.5	77.5	84	70.5	65.5	12.5	3.5	9	8.5	3	0	8.33333	3.83333	0.0664894	0.0194444	0.0459184	0.0473538	0.0151899	N/A	0.0439507	0.0312718	0.536603	0.727278
147786	hsa-miR-3198	0.497882	0.047069	87.5	149	86	94	83	75	24	29.5	19	15.5	12.5	9.5	24.1667	12.5	0.12766	0.163889	0.0969388	0.086351	0.0632911	0.0437788	0.129496	0.0644736	0.258795	0.330534
148619		1.43706	0.390374	13253.5	1330.5	10277	10263.5	14235.5	12399.5	13189.5	1205.5	10213	10187.5	14166	12335	8202.67	12229.5	70.1569	6.69722	52.1071	56.7549	71.7266	56.8433	42.9871	61.7749	0.760649	0.139515
10907	spike_control_v1_h	0.262186	0.150853	91	139	76.5	77.5	76	66.5	26	12	6.5	1	8.5	3	14.8333	4.16667	0.138298	0.0666667	0.0331633	0.00557103	0.043038	0.0138249	0.0793759	0.0208113	0.676618	0.945943
148384	hsa-miR-3648	0.246617	0.11499	126.5	148.5	113	81	78.5	78.5	61.5	22.5	41.5	-4	12	10.5	41.8333	6.16667	0.327128	0.125	0.211735	N/A	0.0607595	0.0483871	0.221287	0.0545733	0.458236	0.160309
148085	hsa-miR-3687	1.03792	0.930884	209.5	145	235	173	169.5	239.5	146	26	159.5	90.5	99.5	172	110.5	120.667	0.776596	0.144444	0.813776	0.504178	0.503797	0.792627	0.578272	0.600201	0.650499	0.27765
148188	hsa-miR-2277-5p	0.110091	0.00402408	80.5	126.5	83	78	74	69.5	14	10	9	0.5	1	2.5	11	1.33333	0.0744681	0.0555556	0.0459184	0.00278552	0.00506329	0.0115207	0.0586473	0.00645651	0.247646	0.701804
147280	hsa-miR-1185-1-3p	1.00486	0.987395	171.5	161	169.5	134.5	167	179.5	105.5	42	95	51	94	114	80.8333	86.3333	0.56117	0.233333	0.484694	0.284123	0.475949	0.525346	0.426399	0.428473	0.402244	0.297399
147469	hsa-miR-3909	0.162535	0.00281993	78.5	129	87	80	72.5	72.5	14	10.5	14	0.5	1	5.5	12.8333	2.33333	0.0744681	0.0583333	0.0714286	0.00278552	0.00506329	0.0253456	0.0680767	0.0110648	0.125942	1.12247
147779	hsa-miR-3180-3p	0.0650599	N/A	73.5	117.5	77.5	73.5	65.5	66.5	9	-0.5	4.5	-6	-3.5	0.5	4.33333	-3	0.0478723	N/A	0.0229592	N/A	N/A	0.00230415	0.0354158	0.00230415	0.497413	N/A
148590	hsa-miR-3919	N/A	N/A	72	110	69	72.5	68.5	62	8	-10	-4	-4	-1.5	-7	-2	-4.16667	0.0425532	N/A	N/A	N/A	N/A	N/A	0.0425532	N/A	N/A	N/A
148065	hsa-miR-3689b-3p/hsa-miR-3689c	0.37363	0.0893795	95	159.5	90.5	82	91	83.5	30.5	42.5	19	3.5	19.5	14.5	30.6667	12.5	0.162234	0.236111	0.0969388	0.0194986	0.0987342	0.0668203	0.165095	0.0616844	0.42176	0.646301
147386	hsa-miR-212-5p	0.606739	0.506718	133.5	133	92	88	102	89	70.5	12	22.5	12	33	22.5	35	22.5	0.375	0.0666667	0.114796	0.0668524	0.167089	0.103687	0.185488	0.112543	0.894278	0.45051
148402	hsa-miR-3920	0.609406	0.29407	86.5	133.5	79	83.5	81.5	82.5	22	21.5	7	6.5	11.5	15.5	16.8333	11.1667	0.117021	0.119444	0.0357143	0.0362117	0.0582278	0.0714286	0.0907267	0.0552894	0.525287	0.321787
148628	hsa-miR-3199	0.236315	0.00129032	80.5	135	88.5	82.5	77.5	70.5	17.5	21.5	20	4.5	7	3	19.6667	4.83333	0.0930851	0.119444	0.102041	0.0250696	0.035443	0.0138249	0.104857	0.0247792	0.127826	0.436334
148064	hsa-miR-3926	0.493408	0.0142683	86	137	103.5	87.5	88.5	84	22.5	25.5	33	9	16.5	17	27	14.1667	0.119681	0.141667	0.168367	0.0501393	0.0835443	0.078341	0.143238	0.0706749	0.170215	0.254314
148317	hsa-miR-3621	1.53071	0.212861	1157.5	422	1367.5	1517.5	1634.5	1313	1096	310	1300	1443	1566.5	1246	902	1418.5	5.82979	1.72222	6.63265	8.039	7.93165	5.74194	4.72822	7.23753	0.557089	0.179112
148571		N/A	N/A	69	120	73.5	69.5	69.5	62	6.5	7.5	5	-4	-2	-2	6.33333	-2.66667	0.0345745	0.0416667	0.0255102	N/A	N/A	N/A	0.0339171	N/A	0.238766	N/A
148522		0.463338	0.240398	82	120.5	75	73	75	72.5	18	7	10	-0.5	4.5	7.5	11.6667	3.83333	0.0957447	0.0388889	0.0510204	N/A	0.0227848	0.0345622	0.0618847	0.0286735	0.483875	0.290438
148249		0.68051	0.24736	338	570.5	309.5	283	332	306	276.5	460	241	204.5	262.5	240.5	325.833	235.833	1.47074	2.55556	1.22959	1.13928	1.32911	1.10829	1.75196	1.19223	0.403147	0.100278
148036		1.3108	0.409479	767.5	290	746.5	767	829	724	705	176	680.5	692.5	761.5	658.5	520.5	704.167	3.75	0.977778	3.47194	3.85794	3.8557	3.03456	2.73324	3.58273	0.558538	0.132505
148020		0.581276	0.00092959	117.5	168	118	106.5	96	99	54.5	45	51	29	29	34	50.1667	30.6667	0.289894	0.25	0.260204	0.16156	0.146835	0.156682	0.266699	0.155026	0.0777083	0.0483832
148310		0.615743	0.092063	85	137	86	79	86	75	20	19.5	17.5	0	16	9.5	19	8.5	0.106383	0.108333	0.0892857	N/A	0.0810127	0.0437788	0.101334	0.0623957	0.103416	0.421957
148105		1.22812	0.412116	99	141.5	88.5	105	106.5	95.5	35	17.5	20.5	27.5	37	29.5	24.3333	31.3333	0.18617	0.0972222	0.104592	0.153203	0.187342	0.135945	0.129328	0.15883	0.381699	0.164682
148187	hsa-miR-410-5p	0.462541	0.0671427	95.5	177	98.5	97.5	87.5	86	31.5	54.5	32.5	19.5	18	20.5	39.5	19.3333	0.167553	0.302778	0.165816	0.108635	0.0911392	0.09447	0.212049	0.0980815	0.370566	0.0947193
148690		1.29525	0.268617	185.5	231.5	252.5	251.5	210	316.5	120.5	107.5	183	170.5	140	250.5	137	187	0.640957	0.597222	0.933673	0.949861	0.708861	1.15438	0.723951	0.9377	0.252692	0.237824
148041		0.242668	0.0260857	85.5	140.5	84	86.5	72	70	21	16.5	10	5.5	2.5	4	15.8333	4	0.111702	0.0916667	0.0510204	0.0306407	0.0126582	0.0184332	0.0847964	0.0205774	0.364623	0.446168
148129		1.04213	0.917832	150.5	148	114.5	134.5	127.5	116.5	84.5	21	43	52	58.5	50.5	49.5	53.6667	0.449468	0.116667	0.219388	0.289694	0.296203	0.232719	0.261841	0.272872	0.65083	0.127992
148218		0.601868	0.0352243	171.5	262	190	146	166.5	141	107	136	113.5	58	96.5	72.5	118.833	75.6667	0.569149	0.755556	0.579082	0.32312	0.488608	0.334101	0.634595	0.381943	0.165258	0.242281
148647		0.286178	0.0560273	78.5	134	81.5	82.5	75	69.5	12	13.5	8.5	-1	5.5	1.5	11.3333	2	0.0638298	0.075	0.0433673	N/A	0.0278481	0.00691244	0.0607324	0.0173803	0.264145	0.851756
148561		1.19034	0.429722	172.5	180.5	131	171.5	159.5	168.5	107.5	62.5	57.5	93	88.5	103.5	75.8333	95	0.571809	0.347222	0.293367	0.518106	0.448101	0.476959	0.404133	0.481055	0.365442	0.0731343
148591		0.516073	0.261312	128	276	133.5	120.5	122	128.5	62	154.5	57.5	42	52	58	91.3333	50.6667	0.329787	0.858333	0.293367	0.233983	0.263291	0.267281	0.493829	0.254852	0.640291	0.0713453
148411		0.356202	0.197096	78.5	130	76	80.5	72	69.5	15	8	3	4.5	3.5	1.5	8.66667	3.16667	0.0797872	0.0444444	0.0153061	0.0250696	0.0177215	0.00691244	0.0465126	0.0165679	0.694226	0.551272
148010		N/A	N/A	71	117.5	69	73.5	71	65.5	8.5	1	-1	-4	-0.5	-0.5	2.83333	-1.66667	0.0452128	0.00555556	N/A	N/A	N/A	N/A	0.0253842	N/A	1.1047	N/A
148100		0.717749	0.10419	767	1191.5	1066.5	749	781.5	778.5	702.5	1075	993.5	669.5	712	710	923.667	697.167	3.7367	5.97222	5.06888	3.72981	3.60506	3.27189	4.92593	3.53559	0.228301	0.0669569
148148		0.134136	0.0160834	80	135.5	82	78.5	74.5	71	17	20	10	0.5	2.5	4	15.6667	2.33333	0.0904255	0.111111	0.0510204	0.00278552	0.0126582	0.0184332	0.0841857	0.0112923	0.36262	0.700721
148415		0.614943	0.0916181	87.5	127.5	84	85	86	80	23	15	15.5	7.5	14.5	13	17.8333	11.6667	0.12234	0.0833333	0.0790816	0.0417827	0.0734177	0.0599078	0.0949185	0.0583694	0.251195	0.271949
148598		N/A	N/A	66.5	110.5	66.5	72	63	61.5	1.5	-2	-6	-4.5	-8.5	-4.5	-2.16667	-5.83333	0.00797872	N/A	N/A	N/A	N/A	N/A	0.00797872	N/A	N/A	N/A
148390		0.32065	N/A	71	109.5	69	73	71.5	63.5	9	0.5	4	-3.5	1.5	-3.5	4.5	-1.83333	0.0478723	0.00277778	0.0204082	N/A	0.00759494	N/A	0.0236861	0.00759494	0.959436	N/A
148254		0.482083	0.222591	82	128	74	75.5	82	69.5	19.5	16	9	0	11.5	4	14.8333	5.16667	0.103723	0.0888889	0.0459184	N/A	0.0582278	0.0184332	0.0795102	0.0383305	0.377588	0.734117
148370		0.62447	0.0350087	104	144.5	106	96	101.5	86	41.5	30.5	39.5	19.5	31.5	22	37.1667	24.3333	0.220745	0.169444	0.201531	0.108635	0.159494	0.101382	0.19724	0.12317	0.131403	0.257084
148177		1.50196	0.300992	200	195	112	251.5	170	206.5	138	84	44.5	176	102	140.5	88.8333	139.5	0.734043	0.466667	0.227041	0.980501	0.516456	0.647465	0.475917	0.714808	0.532924	0.334692
148404		0.664331	0.174077	184	311.5	189.5	167.5	188	174	123.5	202	123.5	91.5	118.5	106.5	149.667	105.5	0.656915	1.12222	0.630102	0.509749	0.6	0.490783	0.80308	0.533511	0.344562	0.109383
148341		0.152908	0.145567	77.5	123.5	75.5	80.5	69	65	16.5	5	9	2.5	0.5	-2	10.1667	0.333333	0.087766	0.0277778	0.0459184	0.0139276	0.00253165	N/A	0.0538207	0.00822961	0.571619	0.979164
11144	hsa-miR-512-3p	0.239152	0.0268814	82.5	142.5	80	79	80	67	18	22.5	14.5	1	11	2	18.3333	4.66667	0.0957447	0.125	0.0739796	0.00557103	0.0556962	0.00921659	0.0982414	0.0234946	0.2606	1.1895
11037	hsa-miR-299-3p	1.10887	0.651858	292.5	281	189.5	250	234.5	325	229	156	122.5	173	166	260.5	169.167	199.833	1.21809	0.866667	0.625	0.963788	0.840506	1.20046	0.903251	1.00159	0.330174	0.18264
42774	kshv-miR-K12-9-5p	N/A	N/A	65.5	131.5	69	68	63	57.5	1	8	-2.5	-12	-8.5	-8.5	2.16667	-9.66667	0.00531915	0.0444444	N/A	N/A	N/A	N/A	0.0248818	N/A	1.11189	N/A
17425		0.607714	N/A	81.5	126	80	76.5	76.5	64	18	6.5	6	-1.5	6.5	-1	10.1667	1.33333	0.0957447	0.0361111	0.0306122	N/A	0.0329114	N/A	0.054156	0.0329114	0.666992	N/A
146083		N/A	N/A	74.5	122	77.5	76.5	71.5	64.5	10	-1	6.5	-2	0	-1	5.16667	-1	0.0531915	N/A	0.0331633	N/A	N/A	N/A	0.0431774	N/A	0.327998	N/A
168646	hsa-miR-4731-3p	0.152334	0.294152	83	170	78	78	72.5	73.5	19.5	44.5	5	-5	3	5	23	1	0.103723	0.247222	0.0255102	N/A	0.0151899	0.0230415	0.125485	0.0191157	0.896094	0.290438
168958	hsa-miR-2681-5p	2.04166	0.061003	193.5	142.5	223	269	313.5	284.5	127.5	24.5	151	179.5	244	217	101	213.5	0.678191	0.136111	0.770408	1	1.23544	1	0.528237	1.07848	0.648775	0.126041
168677		0.626992	0.188251	109	209.5	133	109	115.5	121	43.5	86	55.5	30	43	51.5	61.6667	41.5	0.231383	0.477778	0.283163	0.167131	0.217722	0.237327	0.330775	0.207393	0.392758	0.174644
168808	hsa-miR-4779	N/A	N/A	63	101.5	64	66	62	61	-1.5	-15	-9.5	-10	-9.5	-8.5	-8.66667	-9.33333	N/A	N/A	N/A	N/A	N/A	N/A	N/A	N/A	N/A	N/A
168796	hsa-miR-3664-3p	0.485331	0.295747	76	121	74.5	77	75.5	70.5	9.5	2.5	4.5	1	5	2.5	5.5	2.83333	0.0505319	0.0138889	0.0229592	0.00557103	0.0253165	0.0115207	0.0291267	0.0141361	0.655214	0.716549
168625	hsa-miR-4539	0.485135	0.270211	83	121	83.5	77.5	81	75	19.5	-1	10.5	0.5	12.5	10.5	9.66667	7.83333	0.103723	N/A	0.0535714	0.00278552	0.0632911	0.0483871	0.0786474	0.0381546	0.450909	0.826217
168593	hsa-miR-4726-3p	0.120578	N/A	71.5	120.5	69	68.5	71	61.5	9	6.5	-0.5	-8	1	-6.5	5	-4.5	0.0478723	0.0361111	N/A	N/A	0.00506329	N/A	0.0419917	0.00506329	0.19805	N/A
168632	hsa-miR-5188	0.19312	N/A	71.5	126	65.5	71	66	69	7.5	10	-2.5	-5.5	-3.5	2	5	-2.33333	0.0398936	0.0555556	N/A	N/A	N/A	0.00921659	0.0477246	0.00921659	0.232054	N/A
168898	hsa-miR-5008-3p	0.575651	0.00340158	112	151.5	124	98.5	98.5	102	48	40.5	52.5	22	29	35	47	28.6667	0.255319	0.225	0.267857	0.122563	0.146835	0.16129	0.249392	0.143563	0.0883539	0.136318
168559	hsa-miR-15a-3p	0.692671	0.511449	84.5	120.5	80	77.5	78.5	78	19.5	7	8.5	2	10.5	14	11.6667	8.83333	0.103723	0.0388889	0.0433673	0.0111421	0.0531646	0.0645161	0.0619932	0.0429409	0.584075	0.654793
168765	hsa-miR-4448	1.22663	0.537569	186	153.5	215.5	172.5	225.5	216.5	123	39.5	149.5	94	156.5	150	104	133.5	0.654255	0.219444	0.762755	0.523677	0.792405	0.691244	0.545485	0.669109	0.527097	0.202844
168849	hsa-miR-4635	0.373169	0.18074	80.5	158.5	81	86.5	83.5	69	18.5	43.5	15	11.5	13.5	5	25.6667	10	0.0984043	0.241667	0.0765306	0.0640669	0.0683544	0.0230415	0.138867	0.0518209	0.645914	0.482735
168614	hsa-miR-5197-5p	0.328429	0.0555146	82.5	120.5	89	77.5	78.5	72	20.5	9	21.5	1.5	8.5	8	17	6	0.109043	0.05	0.109694	0.00835655	0.043038	0.0368664	0.0895788	0.0294203	0.382655	0.628848
168683	hsa-miR-4792	0.662857	0.265866	137.5	146.5	127.5	114	119	92.5	78.5	32.5	63	42.5	49.5	26.5	58	39.5	0.417553	0.180556	0.321429	0.236769	0.250633	0.12212	0.306512	0.203174	0.388894	0.347172
168790	hsa-miR-3120-5p	0.414991	0.0693012	84.5	150.5	84.5	81.5	78.5	82.5	24	36.5	18	10	9.5	15.5	26.1667	11.6667	0.12766	0.202778	0.0918367	0.0557103	0.0481013	0.0714286	0.140758	0.0584134	0.40224	0.203656
168806	hsa-miR-4659a-3p	0.82158	0.607683	87.5	130.5	79.5	86	86	78	25	9	14.5	9.5	18.5	14	16.1667	14	0.132979	0.05	0.0739796	0.0529248	0.0936709	0.0645161	0.0856528	0.0703706	0.498562	0.298341
168924	hsa-miR-4720-5p	0.164278	N/A	73.5	121	64.5	70.5	71	60.5	9.5	2	0	-8	1	-3.5	3.83333	-3.5	0.0505319	0.0111111	N/A	N/A	0.00506329	N/A	0.0308215	0.00506329	0.904392	N/A
168891	hsa-miR-1271-3p	N/A	N/A	72	107	68	70.5	63	59	6.5	-15.5	4	-7.5	-4.5	-6	-1.66667	-6	0.0345745	N/A	0.0204082	N/A	N/A	N/A	0.0274913	N/A	0.364373	N/A
168928	hsa-miR-4431	1.9356	0.0676737	248.5	224.5	250	360.5	295	524.5	184	101	188.5	281.5	227	461	157.833	323.167	0.978723	0.561111	0.961735	1.56825	1.14937	2.12442	0.833856	1.61401	0.283451	0.303057
168702	hsa-miR-4540	0.506255	0.270437	110.5	249.5	122	113	100	123.5	46.5	128	50	34.5	31.5	57	74.8333	41	0.24734	0.711111	0.255102	0.192201	0.159494	0.262673	0.404518	0.204789	0.65645	0.257479
169080	hsa-miR-4684-5p	0.553595	0.0339088	73	121	78	82	75	73.5	10.5	-2.5	8.5	4	5.5	7	5.5	5.5	0.0558511	N/A	0.0433673	0.0222841	0.0278481	0.0322581	0.0496092	0.0274634	0.177937	0.181991
169056	hsa-miR-4669	0.987202	0.983035	102	125	105.5	91	104	95.5	37.5	0.5	32.5	10	33	30.5	23.5	24.5	0.199468	0.00277778	0.165816	0.0557103	0.167089	0.140553	0.122687	0.121117	0.857456	0.480338
169253	hsa-miR-4690-5p	1.0469	0.829972	96.5	137	95.5	103.5	97.5	96.5	31.5	14.5	24.5	22	27	28.5	23.5	25.8333	0.167553	0.0805556	0.125	0.122563	0.136709	0.131336	0.12437	0.130203	0.349782	0.0548446
169022	hsa-miR-4797-5p	1.47973	0.161449	2310	858.5	2291	2654	2658	2878.5	2247.5	738.5	2203.5	2574	2585.5	2813.5	1729.83	2657.67	11.9548	4.10278	11.2423	14.3398	13.0911	12.9654	9.09997	13.4655	0.477181	0.0564276
169266	hsa-miR-378d	0.598311	0.23488	208	170	226.5	129.5	137	166.5	144	48.5	146.5	51	64	99.5	113	71.5	0.765957	0.269444	0.747449	0.284123	0.324051	0.458525	0.594284	0.355566	0.473631	0.256979
169334	hsa-miR-548ao-5p	N/A	N/A	66.5	113	68	73.5	65.5	63	1.5	-11.5	-5	-7	-6	-3.5	-5	-5.5	0.00797872	N/A	N/A	N/A	N/A	N/A	0.00797872	N/A	N/A	N/A
169262	hsa-miR-5009-5p	0.435874	0.261842	79.5	136.5	78.5	78	71.5	75.5	15.5	13.5	5.5	-1.5	2	9.5	11.5	3.33333	0.0824468	0.075	0.0280612	N/A	0.0101266	0.0437788	0.061836	0.0269527	0.47684	0.88287
169079	hsa-miR-4667-5p	0.860504	0.406034	241	230.5	216.5	174.5	207	240	177	113.5	150.5	95.5	136.5	171.5	147	134.5	0.941489	0.630556	0.767857	0.532033	0.691139	0.790323	0.779967	0.671165	0.199778	0.194137
169213	hsa-miR-4768-3p	0.890925	0.708124	77	123.5	77.5	81.5	78	76	13.5	8	5.5	7	9.5	9	9	8.5	0.0718085	0.0444444	0.0280612	0.0389972	0.0481013	0.0414747	0.0481047	0.0428577	0.459459	0.109828
169355	hsa-miR-2355-5p	0.173892	0.366369	75	183.5	85.5	72	72	77.5	12.5	69.5	14.5	-4.5	2.5	10.5	32.1667	2.83333	0.0664894	0.386111	0.0739796	N/A	0.0126582	0.0483871	0.175527	0.0305227	1.03921	0.827717
169238	hsa-miR-4654	0.942695	0.76421	158	166	148	151.5	135	142.5	94	50	77.5	76	67	74.5	73.8333	72.5	0.5	0.277778	0.395408	0.423398	0.339241	0.343318	0.391062	0.368652	0.28429	0.128726
169363	hsa-miR-320c	0.861404	0.412378	900	1281.5	889	852.5	839.5	1090.5	836	1161.5	813	778	772	1024	936.833	858	4.44681	6.45278	4.14796	4.33426	3.90886	4.71889	5.01585	4.32067	0.249879	0.0937788
169061	hsa-miR-548x-3p	N/A	N/A	69	120.5	70	72.5	67	61	6.5	7.5	-0.5	-7	-2	-5	4.5	-4.66667	0.0345745	0.0416667	N/A	N/A	N/A	N/A	0.0381206	N/A	0.131555	N/A
169082	hsa-miR-1275	0.853246	0.521381	1517	1249.5	2355.5	1136	1523.5	1954	1455	1137.5	2288.5	1060.5	1452	1887.5	1627	1466.67	7.73936	6.31944	11.676	5.90808	7.3519	8.69816	8.57828	7.31938	0.323501	0.190634
169096	hsa-miR-4804-3p	0.265546	0.327482	78.5	206.5	77.5	84.5	80	78	16.5	95.5	13.5	12.5	10	13.5	41.8333	12	0.087766	0.530556	0.0688776	0.0696379	0.0506329	0.062212	0.229066	0.0608276	1.14058	0.157458
169304	hsa-miR-4793-5p	0.189722	N/A	72	109	62	72	66.5	67	10.5	-3.5	-1.5	-3	1	3.5	1.83333	0.5	0.0558511	N/A	N/A	N/A	0.00506329	0.016129	0.0558511	0.0105962	N/A	0.738443
169171	hsa-miR-4436b-5p	0.639739	0.281779	111	210	111.5	108.5	122.5	99.5	50.5	92.5	44.5	36	57	34	62.5	42.3333	0.268617	0.513889	0.227041	0.200557	0.288608	0.156682	0.336516	0.215282	0.460633	0.312075
169356	hsa-miR-548aa/hsa-miR-548ap-3p/hsa-miR-548t-3p	0.297002	0.215545	80.5	172.5	80	86.5	82	75	17	52.5	13	7	9.5	10	27.5	8.83333	0.0904255	0.291667	0.0663265	0.0389972	0.0481013	0.0460829	0.149473	0.0443938	0.827786	0.107702
169084	hsa-miR-5708	N/A	N/A	73	121	69	69.5	67.5	62.5	9	0	0	-7	-2.5	-4.5	3	-4.66667	0.0478723	N/A	N/A	N/A	N/A	N/A	0.0478723	N/A	N/A	N/A
169020	hsa-miR-4506	0.779497	0.647626	215	142	157.5	119	164	147.5	150.5	24	88.5	40.5	95	81	87.6667	72.1667	0.800532	0.133333	0.451531	0.225627	0.481013	0.373272	0.461799	0.35997	0.722648	0.356172
169331		N/A	N/A	71	110.5	64.5	70.5	66	64.5	7.5	-12.5	-5.5	-8.5	-3	-1.5	-3.5	-4.33333	0.0398936	N/A	N/A	N/A	N/A	N/A	0.0398936	N/A	N/A	N/A
169344		0.606452	N/A	73.5	117	76	78	69.5	72	9	-8	7	-3	-2	5.5	2.66667	0.166667	0.0478723	N/A	0.0357143	N/A	N/A	0.0253456	0.0417933	0.0253456	0.205704	N/A
169025		1.52093	0.331009	109.5	129	108	115.5	118.5	122.5	43	4	37.5	31	45.5	58.5	28.1667	45	0.228723	0.0222222	0.191327	0.172702	0.23038	0.269585	0.147424	0.224222	0.74634	0.217348
168777		0.117902	0.0736922	80.5	119	78	75	73	67	14.5	-5.5	9	-6	1.5	1.5	6	-1	0.0771277	N/A	0.0459184	N/A	0.00759494	0.00691244	0.061523	0.00725369	0.3587	0.0665312
169414	hsa-miR-525-5p	N/A	N/A	69.5	112	69	74	66	62	5	-10.5	-3.5	-7.5	-4	-4.5	-3	-5.33333	0.0265957	N/A	N/A	N/A	N/A	N/A	0.0265957	N/A	N/A	N/A
168826		0.485116	0.305988	141.5	308	126.5	128.5	103.5	152.5	75	188	51.5	50	32	84	104.833	55.3333	0.398936	1.04444	0.262755	0.278552	0.162025	0.387097	0.568712	0.275891	0.734265	0.407984
169399	hsa-miR-4750-5p	1.3331	0.343475	1038.5	395	821	877	946	1194.5	973	277	750.5	798.5	873.5	1125	666.833	932.333	5.17553	1.53889	3.82908	4.44847	4.42278	5.18433	3.5145	4.68519	0.523152	0.0923027
169008		1.10272	0.787982	603	1608	880.5	1028	951	1589	537.5	1492	795.5	949	881.5	1523	941.667	1117.83	2.85904	8.28889	4.05867	5.28691	4.46329	7.01843	5.06887	5.58954	0.562729	0.233324
169105		0.954216	0.47103	65535	65535	65535	65535	65535	65535	65469.5	65414.5	65467	65455	65463	65466	65450.3	65461.3	348.242	363.414	334.015	364.652	331.458	301.687	348.557	332.599	0.0421791	0.0947029
42494		0.237257	0.139116	97.5	209.5	97.5	85.5	81.5	81	38	98	29.5	11.5	13	18	55.1667	14.1667	0.202128	0.544444	0.15051	0.0640669	0.0658228	0.0829493	0.299027	0.0709463	0.715983	0.147039
17418	kshv-miR-K12-4-3p	0.547858	0.00560017	100.5	155	113.5	91	97	91.5	40.5	40.5	45.5	16.5	30.5	26.5	42.1667	24.5	0.215426	0.225	0.232143	0.091922	0.15443	0.12212	0.224189	0.122824	0.0374152	0.254511
42891		0.338543	0.358155	379	2389.5	522	400	383	541.5	319.5	2261.5	456	326	315.5	478	1012.33	373.167	1.69947	12.5639	2.32653	1.81616	1.59747	2.20276	5.52996	1.87213	1.10301	0.16372
46816		0.171202	N/A	71	122.5	73.5	71	68	63	10.5	15	7.5	-1.5	2	-1.5	11	-0.333333	0.0558511	0.0833333	0.0382653	N/A	0.0101266	N/A	0.0591499	0.0101266	0.384014	N/A
42757	hsa-miR-619-3p	0.501853	N/A	71	111	73.5	77	68	60	9.5	2	7.5	3	0	-6	6.33333	-1	0.0505319	0.0111111	0.0382653	0.0167131	N/A	N/A	0.0333028	0.0167131	0.60576	N/A
11108	hsa-miR-425-3p	0.445125	0.0325027	92.5	157	98.5	90	86	83.5	31.5	48	31.5	15.5	17.5	19.5	37	17.5	0.167553	0.266667	0.160714	0.086351	0.0886076	0.0898618	0.198311	0.0882734	0.299005	0.0201542
11015		1.22656	0.493688	139.5	189.5	155	141.5	224.5	162	80.5	78.5	88	67	157.5	95.5	82.3333	106.667	0.428191	0.436111	0.44898	0.373259	0.797468	0.440092	0.437761	0.53694	0.0239669	0.424788
42853		0.462883	0.00891706	91.5	144	91	89.5	83	82	34.5	35.5	26.5	16	15	16	32.1667	15.6667	0.183511	0.197222	0.135204	0.0891365	0.0759494	0.0737327	0.171979	0.0796062	0.189428	0.104609
42829	hsa-miR-127-3p	0.855668	0.163889	756.5	849	718.5	688.5	609	813	698.5	741.5	656	614	541.5	739	698.667	631.5	3.71543	4.11944	3.34694	3.42061	2.74177	3.40553	3.72727	3.1893	0.103665	0.121546
46259	hsa-miR-885-5p	0.546441	0.0177335	130.5	197	136.5	118.5	110	110	68.5	88.5	71	46.5	43	41	76	43.5	0.364362	0.491667	0.362245	0.259053	0.217722	0.18894	0.406091	0.221905	0.182516	0.158821
46737	hsa-miR-1265	0.557183	0.453661	226	963.5	323	336	251	388	166.5	854.5	257	261.5	182	323.5	426	255.667	0.885638	4.74722	1.31122	1.45682	0.921519	1.49078	2.3147	1.28971	0.914743	0.247586
42658		0.302775	0.0209327	77.5	133	83	77.5	80.5	78.5	18	23.5	16.5	1.5	11	6.5	19.3333	6.33333	0.0957447	0.130556	0.0841837	0.00835655	0.0556962	0.0299539	0.103495	0.0313356	0.233228	0.756331
42719		0.415669	0.0630384	109	188	105	98.5	96	96	49	77	39.5	23	25	25	55.1667	24.3333	0.260638	0.427778	0.201531	0.128134	0.126582	0.115207	0.296649	0.123308	0.395564	0.0572382
42470		0.76357	0.45071	82	115.5	87.5	87.5	91	83.5	22.5	9	23.5	12	20	11.5	18.3333	14.5	0.119681	0.05	0.119898	0.0668524	0.101266	0.0529954	0.0965263	0.0737045	0.417431	0.337212
42535	hsa-miR-661	0.392576	0.116911	75	130.5	81.5	89	75.5	80.5	16	27.5	12.5	12	7	3.5	18.6667	7.5	0.0851064	0.152778	0.0637755	0.0668524	0.035443	0.016129	0.100553	0.0394748	0.462127	0.648537
42601		0.393589	0.0418136	76.5	121.5	80.5	82	78	78	18	13	14.5	8.5	9	0.5	15.1667	6	0.0957447	0.0722222	0.0739796	0.0473538	0.0455696	0.00230415	0.0806488	0.0317425	0.162468	0.803653
42542	hsa-miR-589-5p	1.0885	0.877698	1077	1707.5	398	1825.5	838.5	883	1019	1598.5	329	1753	771.5	807.5	982.167	1110.67	5.42021	8.88056	1.67857	9.76602	3.90633	3.7212	5.32645	5.79785	0.676231	0.592941
42680		0.366997	0.0188086	81.5	124.5	84	86	78.5	84	24	20	17.5	10	10.5	2.5	20.5	7.66667	0.12766	0.111111	0.0892857	0.0557103	0.0531646	0.0115207	0.109352	0.0401319	0.176012	0.618228
42607	hsa-miR-653-5p	0.32348	0.0569095	73	116.5	75.5	76.5	73	68.5	14.5	8	10	3.5	3.5	-13	10.8333	-2	0.0771277	0.0444444	0.0510204	0.0194986	0.0177215	N/A	0.0575308	0.0186101	0.300481	0.0675221
17646	ebv-miR-BHRF1-3	0.324068	0.430749	76	173	77	84	75	82	18	67	10.5	12.5	8.5	-1	31.8333	6.66667	0.0957447	0.372222	0.0535714	0.0696379	0.043038	N/A	0.173846	0.0563379	0.995639	0.33386
17893	hsa-miR-362-3p	1.02152	0.939387	83.5	138	107	92	106.5	106.5	23	25.5	41.5	17.5	38.5	42	30	32.6667	0.12234	0.141667	0.211735	0.097493	0.194937	0.193548	0.158581	0.161993	0.296607	0.344847
6880	hsa-miR-297	0.21174	0.00816928	92	153.5	91	78.5	78	73	31	39	25.5	2.5	10	9.5	31.8333	7.33333	0.164894	0.216667	0.130102	0.0139276	0.0506329	0.0437788	0.170554	0.0361131	0.255397	0.540426
42448		0.75253	0.204358	146.5	228.5	147.5	131.5	140	159.5	84	115.5	79	57	72.5	95	92.8333	74.8333	0.446809	0.641667	0.403061	0.317549	0.367089	0.437788	0.497179	0.374142	0.255497	0.161514
32095	hsa-miR-624-3p	0.329293	0.154218	69	131.5	73	76.5	72.5	63	7	16.5	10	3	4.5	-3	11.1667	1.5	0.037234	0.0916667	0.0510204	0.0167131	0.0227848	N/A	0.0599737	0.019749	0.471861	0.217397
42567	hsa-miR-590-3p	0.258472	0.0916941	83.5	150	80	76	84	67.5	23.5	38.5	14.5	3	15.5	2.5	25.5	7	0.125	0.213889	0.0739796	0.0167131	0.078481	0.0115207	0.137623	0.0355716	0.514476	1.04722
42903		0.541358	N/A	74	124	73.5	69.5	75	65.5	13.5	16	7	-4.5	7	-0.5	12.1667	0.666667	0.0718085	0.0888889	0.0357143	N/A	0.035443	N/A	0.0654706	0.035443	0.414659	N/A
42879		0.50486	0.0528269	130.5	191	111.5	108	105.5	99.5	67	82	46.5	32.5	37	35	65.1667	34.8333	0.356383	0.455556	0.237245	0.181058	0.187342	0.16129	0.349728	0.176564	0.31255	0.0769976
42758		0.521001	0.0479413	144.5	153	125.5	108	102.5	101.5	83.5	45.5	60.5	32	35.5	36	63.1667	34.5	0.444149	0.252778	0.308673	0.178273	0.179747	0.165899	0.3352	0.174639	0.29357	0.0435502
30973		0.216784	N/A	70	120.5	67	69.5	71	63	11.5	11	3.5	-6.5	2	-4.5	8.66667	-3	0.0611702	0.0611111	0.0178571	N/A	0.0101266	N/A	0.0467128	0.0101266	0.534966	N/A
17325	hsa-miR-643	0.411231	0.1872	83.5	160	84	86.5	79	78.5	24	52	17	14.5	14	12	31	13.5	0.12766	0.288889	0.0867347	0.0807799	0.0708861	0.0552995	0.167761	0.0689885	0.637078	0.186201
42714		0.232236	0.00997218	81	127	85	78.5	79.5	67.5	22.5	17.5	18	2.5	10.5	1	19.3333	4.66667	0.119681	0.0972222	0.0918367	0.0139276	0.0531646	0.00460829	0.102913	0.0239001	0.143506	1.07817
17630	hsa-miR-588	0.405675	0.0814669	90	150.5	86.5	87.5	87	78	29.5	42	18	12	14.5	12	29.8333	12.8333	0.156915	0.233333	0.0918367	0.0668524	0.0734177	0.0552995	0.160695	0.0651899	0.440736	0.140709
42941	hsa-miR-218-1-3p	0.516806	0.0323869	113.5	141	123.5	102	98	95	54	33	60	26.5	26	26.5	49	26.3333	0.287234	0.183333	0.306122	0.147632	0.131646	0.12212	0.258897	0.133799	0.255383	0.0963524
42944	hsa-miR-564	0.240686	0.102734	80	125.5	71.5	77.5	75.5	72.5	19.5	19	5	2.5	7.5	1	14.5	3.66667	0.103723	0.105556	0.0255102	0.0139276	0.0379747	0.00460829	0.0782631	0.0188369	0.583858	0.913975
14305		0.399686	0.0582434	91	157	93.5	88.5	87.5	87.5	32.5	49.5	26	14	19.5	12	36	15.1667	0.172872	0.275	0.132653	0.0779944	0.0987342	0.0552995	0.193508	0.0773427	0.379223	0.280888
42562	hsa-miR-105-3p	0.356711	0.0471134	78.5	140.5	83.5	83.5	81	80.5	20.5	33.5	19	7.5	13	7	24.3333	9.16667	0.109043	0.186111	0.0969388	0.0417827	0.0658228	0.0322581	0.130697	0.0466212	0.370089	0.371024
42571	hsa-miR-129-1-3p	0.910164	0.67893	142.5	264.5	201	186.5	202.5	191.5	83.5	158	134	111	136	112.5	125.167	119.833	0.444149	0.877778	0.683673	0.618384	0.688608	0.518433	0.668533	0.608475	0.324906	0.140546
17439	hcmv-miR-UL36-5p	0.279714	0.0974842	81.5	143.5	83.5	80.5	75.5	80	22	36	18.5	6.5	8	-4	25.5	3.5	0.117021	0.2	0.0943878	0.0362117	0.0405063	N/A	0.137136	0.038359	0.405475	0.0791668
46443	hsa-miR-193a-5p	1.31545	0.554315	764	163.5	751	858.5	673.5	625	705	56	688.5	784	604.5	550	483.167	646.167	3.75	0.311111	3.51276	4.36769	3.06076	2.53456	2.52462	3.321	0.760757	0.284211
10923	hsa-miR-107	0.776191	0.0618977	655	728.5	884	555	660.5	671.5	596.5	622.5	817	483.5	592.5	583.5	678.667	553.167	3.17287	3.45833	4.16837	2.69359	3	2.68894	3.59986	2.79418	0.142399	0.0637978
46850	hsa-miR-1237-3p	0.28636	0.045877	102	176	105	91	88.5	90	43	72.5	37.5	17.5	20	8	51	15.1667	0.228723	0.402778	0.191327	0.097493	0.101266	0.0368664	0.274276	0.0785417	0.411432	0.460153
27672	hsa-miR-615-3p	0.783282	0.204673	334.5	465	328.5	328.5	272.5	339	270.5	354.5	262	255.5	204	273.5	295.667	244.333	1.43883	1.96944	1.33673	1.4234	1.03291	1.26037	1.58167	1.23889	0.214761	0.158309
17503	hsa-miR-590-5p	0.889371	0.734192	98.5	133	103.5	88	108.5	99	38	19	37	13	41.5	34.5	31.3333	29.6667	0.202128	0.105556	0.188776	0.0724234	0.210127	0.158986	0.165486	0.147179	0.316214	0.472941
13140	hsa-miR-138-5p	0.888238	0.3134	1556.5	2085	1895.5	1522.5	1826.5	1829	1496	1975.5	1829.5	1448	1760.5	1763.5	1767	1657.33	7.95745	10.975	9.33418	8.06685	8.91392	8.12673	9.42221	8.36917	0.160334	0.0564837
42449		0.503086	N/A	77	126.5	73	71.5	73	65.5	16	14	9.5	-1	7	0	13.1667	2	0.0851064	0.0777778	0.0484694	N/A	0.035443	N/A	0.0704512	0.035443	0.275173	N/A
11013	hsa-miR-181a-3p	0.96809	0.631198	136	176.5	141	141.5	132.5	153	75.5	65.5	74	68	65	86.5	71.6667	73.1667	0.401596	0.363889	0.377551	0.37883	0.329114	0.398618	0.381012	0.368854	0.0501039	0.0970836
46674		0.18466	0.0790727	72.5	130.5	76.5	75.5	75	67	11	23	8.5	1	5	2.5	14.1667	2.83333	0.0585106	0.127778	0.0433673	0.00557103	0.0253165	0.0115207	0.0765519	0.0141361	0.587894	0.716549
42733		0.300516	0.170347	90.5	190.5	96	91.5	85	74.5	30	81	25.5	17.5	16	9.5	45.5	14.3333	0.159574	0.45	0.130102	0.097493	0.0810127	0.0437788	0.246559	0.0740948	0.717072	0.371378
46328		1.11431	0.62329	8900.5	4810	7747	8847.5	8917.5	6889.5	8837	4700	7678	8771	8851	6824	7071.67	8148.67	47.0053	26.1111	39.1735	48.8635	44.8152	31.447	37.43	41.7086	0.282011	0.218525
29802	hsa-miR-144-3p	0.319728	N/A	74	120	71.5	76	71.5	61	16.5	10	4.5	-1.5	3.5	-3.5	10.3333	-0.5	0.087766	0.0555556	0.0229592	N/A	0.0177215	N/A	0.0554269	0.0177215	0.584618	N/A
42551	hsa-miR-122-3p	0.217439	0.20593	75.5	183.5	85.5	84	76	74.5	16.5	72	20	10	7.5	7.5	36.1667	8.33333	0.087766	0.4	0.102041	0.0557103	0.0379747	0.0345622	0.196602	0.0427491	0.896694	0.265589
42899	hsa-miR-377-5p	0.499861	0.122542	126.5	231.5	129	120	106.5	111.5	66.5	119.5	60.5	46	38	46.5	82.1667	43.5	0.353723	0.663889	0.308673	0.256267	0.192405	0.214286	0.442095	0.220986	0.437451	0.146861
42885	hsa-miR-376a-5p	0.559455	0.258323	356	857.5	413	295.5	344.5	407.5	295	748	347.5	221.5	273	342.5	463.5	279	1.56915	4.15556	1.77296	1.23398	1.38228	1.57834	2.49922	1.3982	0.575396	0.123537
42956	hsa-miR-545-5p	0.308959	0.00916725	82.5	138	85.5	83.5	81	74.5	23	29.5	21	9.5	9	5	24.5	7.83333	0.12234	0.163889	0.107143	0.0529248	0.0455696	0.0230415	0.131124	0.040512	0.224025	0.384341
42968		1.918	0.00232999	105	165.5	114	168	169.5	166	46	57	44.5	96.5	101	100.5	49.1667	99.3333	0.244681	0.316667	0.227041	0.537604	0.511392	0.463134	0.262796	0.504044	0.180671	0.0749447
13149		0.105897	0.0625712	69	124.5	74.5	74.5	70.5	71.5	10	16	8	0.5	2	-4.5	11.3333	-0.666667	0.0531915	0.0888889	0.0408163	0.00278552	0.0101266	N/A	0.0609656	0.00645605	0.409434	0.804039
17732	hsa-miR-192-5p	0.387861	0.342459	73	145.5	81	84.5	76	72	14	41	13.5	9.5	8.5	-3	22.8333	5	0.0744681	0.227778	0.0688776	0.0529248	0.043038	N/A	0.123708	0.0479814	0.7289	0.145703
46746	hsa-miR-1269a	0.388425	0.24041	74	130	74	78	75	70	16	24.5	8	4	9	-6	16.1667	2.33333	0.0851064	0.136111	0.0408163	0.0222841	0.0455696	N/A	0.0873446	0.0339269	0.545962	0.485318
46251		0.568337	0.355794	83.5	159.5	81.5	101.5	88.5	87	25	52	17	28	19	8	31.3333	18.3333	0.132979	0.288889	0.0867347	0.155989	0.0962025	0.0368664	0.169534	0.0963526	0.624764	0.618161
42669	hsa-miR-505-3p	0.574538	0.178883	150.5	259	142	146	122.5	142.5	90	149.5	72	73	53.5	62	103.833	62.8333	0.478723	0.830556	0.367347	0.406685	0.270886	0.285714	0.558875	0.321095	0.432623	0.231997
146135		0.443073	0.194337	78.5	139	82	82.5	80	83.5	19.5	35	18	7.5	14.5	-1.5	24.1667	6.83333	0.103723	0.194444	0.0918367	0.0417827	0.0734177	N/A	0.130002	0.0576002	0.431724	0.388355
146019		0.758842	0.663615	77	109	99	86	81.5	90.5	16.5	2	32.5	12	16	11.5	17	13.1667	0.087766	0.0111111	0.165816	0.0668524	0.0810127	0.0529954	0.0882311	0.0669535	0.876716	0.209233
146172		0.668896	0.033502	149	203.5	143	128.5	130	126	88	96	73.5	58	62.5	61	85.8333	60.5	0.468085	0.533333	0.375	0.32312	0.316456	0.281106	0.458806	0.306894	0.173436	0.0735763
4040	hsa-miR-9-5p	0.379809	0.0806358	89.5	160.5	86	83.5	79	81.5	31	49.5	21.5	12.5	12	17	34	13.8333	0.164894	0.275	0.109694	0.0696379	0.0607595	0.078341	0.183196	0.0695795	0.459394	0.126343
146195		0.242604	0.306542	103	370.5	107.5	98	92.5	103.5	44.5	258.5	40.5	25.5	26.5	39	114.5	30.3333	0.236702	1.43611	0.206633	0.142061	0.134177	0.179724	0.626482	0.151987	1.11946	0.160155
42793		0.898845	0.788587	359	734	278.5	429	426.5	431.5	301.5	619.5	212	356.5	360.5	368	377.667	361.667	1.60372	3.44167	1.08163	1.98607	1.82532	1.69585	2.04234	1.83575	0.606974	0.0791998
17892	hsa-miR-372-5p	0.661917	0.37121	105	210.5	108	109	107.5	118	42	99	42.5	37.5	39.5	53.5	61.1667	43.5	0.223404	0.55	0.216837	0.208914	0.2	0.246544	0.33008	0.218486	0.577085	0.11307
146222		0.242175	0.115162	84	146.5	77.5	77	80.5	67.5	24	39	10.5	3	13	3	24.5	6.33333	0.12766	0.216667	0.0535714	0.0167131	0.0658228	0.0138249	0.132633	0.0321203	0.615695	0.909798
17927		1.14058	0.305942	3491.5	3197.5	4158.5	3966	3599.5	5411	3432	3087	4092	3893	3529.5	5346	3537	4256.17	18.2553	17.15	20.8776	21.688	17.8709	24.6359	18.761	21.3983	0.102048	0.158509
146187		0.820297	0.275476	138	204	138	149.5	135.5	133.5	77.5	96	70	75.5	67	67	81.1667	69.8333	0.412234	0.533333	0.357143	0.420613	0.339241	0.308756	0.434237	0.356203	0.207565	0.162339
146010	hsa-miR-2116-5p	0.262061	0.344801	134	616	138	129.5	126	137	74	508.5	67.5	55	57	73.5	216.667	61.8333	0.393617	2.825	0.344388	0.306407	0.288608	0.33871	1.18767	0.311241	1.19409	0.081604
146140	hsa-miR-1976	0.490786	0.125892	109	192.5	103.5	105.5	95	94	50.5	83	37.5	31	26.5	31.5	57	29.6667	0.268617	0.461111	0.191327	0.172702	0.134177	0.145161	0.307018	0.15068	0.452518	0.131713
146184		0.445204	0.139014	81	145	78.5	86.5	79	75	22	36.5	14	12.5	12	9.5	24.1667	11.3333	0.117021	0.202778	0.0714286	0.0696379	0.0607595	0.0437788	0.130409	0.0580587	0.511392	0.226312
146088		1.4804	0.0304234	11908.5	8139.5	13977	17006.5	17657	17649.5	11850.5	8029.5	13910	16933	17587	17584.5	11263.3	17368.2	63.0346	44.6083	70.9694	94.3343	89.0481	81.0346	59.5374	88.139	0.227151	0.0759743
146142	hsa-miR-1972	0.384733	0.0368252	81.5	139.5	85	82	84	74	24	32	19.5	8.5	15.5	6.5	25.1667	10.1667	0.12766	0.177778	0.0994898	0.0473538	0.078481	0.0299539	0.134976	0.0519296	0.293782	0.47343
146163	hsa-miR-224-3p	0.98314	0.905048	162.5	206.5	184.5	199	162	177	104.5	96.5	118	125.5	93	107.5	106.333	108.667	0.555851	0.536111	0.602041	0.699164	0.470886	0.495392	0.564668	0.555147	0.0599247	0.225747
146143		0.278284	0.212788	81	152.5	83.5	81.5	76	73.5	22	45	15	7.5	8	0	27.3333	5.16667	0.117021	0.25	0.0765306	0.0417827	0.0405063	N/A	0.147851	0.0411445	0.613802	0.0219361
19013	SNORD14B	0.599984	0.201601	141	303.5	194	148	159	170	82.5	194.5	128	74.5	94	89.5	135	86	0.43883	1.08056	0.653061	0.415042	0.475949	0.412442	0.724149	0.434478	0.451172	0.0827174
146054		0.946371	0.680628	394.5	536.5	429	424.5	484.5	434.5	335	428	361	350	419	349	374.667	372.667	1.78191	2.37778	1.84184	1.94986	2.12152	1.60829	2.00051	1.89322	0.164005	0.137996
11177		0.751018	0.358442	319.5	526	309.5	363	289.5	272	261	414.5	239	291	222.5	204	304.833	239.167	1.3883	2.30278	1.21939	1.62117	1.12658	0.940092	1.63682	1.22928	0.356109	0.286315
145749	hsa-miR-137	0.877431	0.769888	74	115	106	88.5	91.5	102.5	16	10	39	16.5	22.5	20	21.6667	19.6667	0.0851064	0.0555556	0.19898	0.091922	0.113924	0.0921659	0.113214	0.0993373	0.668917	0.127173
145740		1.28714	0.192441	437	485.5	582	577	770	564.5	376.5	379	515.5	506.5	701.5	499	423.667	569	2.00266	2.10556	2.6301	2.82173	3.5519	2.29954	2.24611	2.89105	0.149818	0.217585
145805		0.148224	0.160603	544	1741	469.5	248.5	187.5	160.5	484.5	1637	405	177	120.5	95.5	842.167	131	2.57713	9.09444	2.06633	0.986072	0.610127	0.440092	4.5793	0.678764	0.855712	0.411611
145970	hsa-miR-129-2-3p	0.223195	0.140527	83	175.5	87	81	79	76.5	24	66.5	20.5	6	9	12	37	9	0.12766	0.369444	0.104592	0.0334262	0.0455696	0.0552995	0.200565	0.0447651	0.731471	0.244808
145822	hsa-miR-214-5p	0.638376	0.0924951	347	567.5	403	269	303	369	289	454.5	337	197.5	234.5	304.5	360.167	245.5	1.53723	2.525	1.71939	1.10028	1.18734	1.40323	1.92721	1.23028	0.272754	0.126777
145789	hsa-miR-550a-3-5p/hsa-miR-550a-5p	0.834074	0.724582	844.5	191.5	762	583	489	461.5	785.5	79	693.5	510.5	419.5	398	519.333	442.667	4.17819	0.438889	3.53827	2.84401	2.12405	1.8341	2.71845	2.26739	0.735683	0.229334
145768	hsa-miR-665	1.22424	0.59176	723	228.5	774.5	667	750.5	661	663	115.5	706	592.5	683.5	597	494.833	624.333	3.5266	0.641667	3.60204	3.30084	3.46076	2.75115	2.5901	3.17092	0.651641	0.117385
145972	hsa-miR-141-5p	0.334898	0.184581	83	153	75	82.5	78	72	24	42.5	8.5	11	8	7.5	25	8.83333	0.12766	0.236111	0.0433673	0.0612813	0.0405063	0.0345622	0.135713	0.04545	0.711974	0.308665
145746	hsa-let-7i-3p	0.472256	0.284065	235	629	243	193	172.5	288.5	175	516	176	120	102.5	223.5	289	148.667	0.930851	2.86667	0.897959	0.668524	0.518987	1.02995	1.56516	0.739155	0.72022	0.355411
145676	hsa-miR-30e-3p	1.01441	0.951957	347	628.5	392	404.5	472.5	566	287.5	523.5	327.5	331.5	404	500	379.5	411.833	1.52926	2.90833	1.67092	1.8468	2.04557	2.30415	2.03617	2.0655	0.372577	0.111027
147604	hsa-miR-4285	1.42044	0.273871	931.5	341	1029.5	1055	1110.5	1064	872.5	229.5	958	982.5	1041.5	998	686.667	1007.33	4.64096	1.275	4.88776	5.47354	5.27342	4.59908	3.60124	5.11534	0.560462	0.0895657
147899		0.173272	N/A	68	111	72.5	72.5	70.5	66	7.5	-1	0	-0.5	0	1.5	2.16667	0.333333	0.0398936	N/A	N/A	N/A	N/A	0.00691244	0.0398936	0.00691244	N/A	N/A
147915	hsa-miR-3174	0.857309	0.773746	92	177.5	80.5	112.5	99.5	97.5	31.5	68.5	13	39	32	32	37.6667	34.3333	0.167553	0.380556	0.0663265	0.21727	0.162025	0.147465	0.204812	0.175587	0.783127	0.209728
147804	hsv1-miR-H17	0.903942	0.600891	315	242.5	279.5	232.5	280	274.5	256.5	138	213.5	157	211.5	209.5	202.667	192.667	1.36436	0.766667	1.08929	0.874652	1.07089	0.965438	1.07344	0.970325	0.278696	0.101212
147983		0.89221	0.358256	689	612.5	838.5	625.5	628	729	630	496.5	771	549	559.5	666	632.5	591.5	3.35106	2.75833	3.93367	3.0585	2.83291	3.06912	3.34769	2.98684	0.175547	0.0446677
147613	hsa-miR-3145-3p	0.234295	0.00866791	76	129.5	80	76	69.5	72	14.5	21	15.5	3	2.5	7.5	17	4.33333	0.0771277	0.116667	0.0790816	0.0167131	0.0126582	0.0345622	0.0909587	0.0213112	0.245004	0.546823
147813		0.387868	0.328301	234	885	244.5	218	244	225.5	174	775.5	181	142.5	177	151.5	376.833	157	0.925532	4.30833	0.923469	0.793872	0.896203	0.698157	2.05244	0.796077	0.951868	0.124412
147655		0.453905	0.0577412	728	873	455.5	356.5	375	362	667	767.5	390	282.5	308	285.5	608.167	292	3.54787	4.26389	1.9898	1.57382	1.55949	1.31567	3.26719	1.48299	0.355884	0.097832
147800		0.528638	0.0387207	90.5	154.5	109	97.5	89.5	89.5	30.5	48	41	25	20	21	39.8333	22	0.162234	0.266667	0.209184	0.139276	0.101266	0.0967742	0.212695	0.112439	0.245915	0.207668
147918		0.559513	N/A	72	110.5	76	73.5	71	71.5	12	0	7	0	5.5	-3.5	6.33333	0.666667	0.0638298	N/A	0.0357143	N/A	0.0278481	N/A	0.049772	0.0278481	0.399434	N/A
147570	hsa-miR-4271	0.583894	0.281301	99	250	186	145.5	127.5	123.5	38.5	140.5	120	72.5	58.5	50.5	99.6667	60.5	0.204787	0.780556	0.612245	0.4039	0.296203	0.232719	0.532529	0.31094	0.555924	0.278307
147523	hsa-miR-4263	0.366593	0.0205539	75	119	81	76.5	72.5	72.5	11.5	10	15.5	4.5	4.5	-2	12.3333	2.33333	0.0611702	0.0555556	0.0790816	0.0250696	0.0227848	N/A	0.0652691	0.0239272	0.188251	0.0675221
147947	hsa-miR-4308	0.300445	0.422236	160.5	1242.5	175	233.5	161	261	102	1142	106	161	92.5	188	450	147.167	0.542553	6.34444	0.540816	0.896936	0.468354	0.866359	2.47594	0.743883	1.35311	0.321427
147694	hsa-miR-4281	0.325138	0.050366	78.5	138.5	83.5	81.5	78.5	85.5	20.5	32	17	8	12	3.5	23.1667	7.83333	0.109043	0.177778	0.0867347	0.0445682	0.0607595	0.016129	0.124518	0.0404856	0.381097	0.558065
147772	hsa-miR-4303	0.352936	0.0344681	92.5	134.5	84	87.5	77	75	36	23	20.5	13.5	6.5	9	26.5	9.66667	0.191489	0.127778	0.104592	0.0752089	0.0329114	0.0414747	0.141286	0.049865	0.318475	0.448455
148374	hsa-miR-3936	0.175639	0.026049	80.5	122	78	74.5	72.5	66	21	10	12	1.5	4	2.5	14.3333	2.66667	0.111702	0.0555556	0.0612245	0.00835655	0.0202532	0.0115207	0.0761607	0.0133768	0.405852	0.460623
148263	hsa-miR-1273e	1.02033	0.88576	126	159	126	135.5	129	119.5	66	46.5	57.5	63	63	54.5	56.6667	60.1667	0.351064	0.258333	0.293367	0.350975	0.318987	0.251152	0.300922	0.307038	0.155604	0.166015
148585	hsa-miR-3912-3p	0.0758742	N/A	69	105.5	67	74	66.5	65.5	9.5	-7	2	0	-0.5	0.5	1.5	0	0.0505319	N/A	0.0102041	N/A	N/A	0.00230415	0.030368	0.00230415	0.939018	N/A
148331	hsa-miR-3655	0.374451	0.0750841	91.5	159.5	87.5	87	89	73	31.5	48	23.5	11.5	21.5	7.5	34.3333	13.5	0.167553	0.266667	0.119898	0.0640669	0.108861	0.0345622	0.184706	0.0691633	0.405362	0.540902
147262	hsa-miR-548h-3p/hsa-miR-548z	0.262182	0.0032671	76	130.5	81.5	78.5	74.5	69.5	17	23.5	19	5	5.5	6	19.8333	5.5	0.0904255	0.130556	0.0969388	0.0278552	0.0278481	0.0276498	0.105973	0.0277843	0.203226	0.00419646
148410		0.899538	0.670053	1061	1798.5	1148	1345	1304.5	1115.5	1002	1689.5	1081.5	1272.5	1238.5	1050.5	1257.67	1187.17	5.32979	9.38611	5.51786	7.08914	6.27089	4.84101	6.74459	6.06701	0.339466	0.187546
148214	hsa-miR-3675-3p	0.653784	0.204326	84.5	150	109	96	103	79.5	25.5	39	39	23	34.5	12.5	34.5	23.3333	0.135638	0.216667	0.19898	0.128134	0.174684	0.0576037	0.183762	0.12014	0.231843	0.490658
147684	hsa-miR-3200-5p	0.413409	0.107965	110	135.5	89	88	82.5	78	51	24.5	22.5	13	16.5	13	32.6667	14.1667	0.271277	0.136111	0.114796	0.0724234	0.0835443	0.0599078	0.174061	0.0719585	0.487546	0.164332
148228	hsa-miR-3656	1.29413	0.493986	207	159.5	220.5	261.5	232	171.5	147.5	46.5	153.5	187	164.5	106	115.833	152.5	0.784574	0.258333	0.783163	1.04178	0.832911	0.488479	0.60869	0.787724	0.498478	0.3547
148641	hsa-miR-518b	0.309847	0.0668125	98	181	100.5	86	89	78.5	39	74	35.5	16	19.5	13	49.5	16.1667	0.207447	0.411111	0.181122	0.0891365	0.0987342	0.0599078	0.26656	0.0825928	0.472219	0.244857
148353	hsa-miR-3681-5p	0.318635	0.00100894	80	132	82.5	80.5	74.5	75	19.5	20	17	6.5	5	7.5	18.8333	6.33333	0.103723	0.111111	0.0867347	0.0362117	0.0253165	0.0345622	0.100523	0.0320301	0.124343	0.18334
148132	hsa-miR-3622a-3p	0.450145	0.127377	96	189	108	95	94.5	93.5	37	80	40.5	23	25.5	27	52.5	25.1667	0.196809	0.444444	0.206633	0.128134	0.129114	0.124424	0.282629	0.127224	0.496138	0.0194446
148272	hsa-miR-3615	0.258826	0.0846221	76.5	136.5	74.5	79	73	74	17.5	28	9	5.5	4	5.5	18.1667	5	0.0930851	0.155556	0.0459184	0.0306407	0.0202532	0.0253456	0.0981863	0.0254132	0.560122	0.204386
148216	hsa-miR-3907	1.19102	0.642314	1502.5	1208	728.5	1850	1416	877	1441.5	1103.5	661	1775.5	1350.5	807.5	1068.67	1311.17	7.66755	6.13056	3.37245	9.89136	6.83797	3.7212	5.72352	6.81685	0.380236	0.452576
148621	hsa-miR-892a	0.295336	0.135928	88.5	180.5	94.5	83	90.5	83.5	30.5	72.5	26	10	21.5	9	43	13.5	0.162234	0.402778	0.132653	0.0557103	0.108861	0.0414747	0.232555	0.0686819	0.637086	0.517115
147389	hsa-miR-3691-5p	0.196422	0.0665727	75	127.5	79	77.5	71.5	73.5	16	22.5	11.5	4.5	2	0	16.6667	2.16667	0.0851064	0.125	0.0586735	0.0250696	0.0101266	N/A	0.0895933	0.0175981	0.372686	0.600424
148485		0.373509	0.305355	148.5	467	148.5	144	140	147	90.5	358	82	69.5	72	71	176.833	70.8333	0.481383	1.98889	0.418367	0.387187	0.364557	0.327189	0.96288	0.359644	0.923385	0.0842473
148681		0.408329	0.106369	71.5	126	73.5	75.5	73.5	67	13.5	13	7.5	3	6.5	-6	11.3333	1.16667	0.0718085	0.0722222	0.0382653	0.0167131	0.0329114	N/A	0.0607653	0.0248122	0.320688	0.461624
148081		0.348861	0.195555	87.5	192.5	95	88.5	89.5	90.5	29	84.5	28.5	17	22	13.5	47.3333	17.5	0.154255	0.469444	0.145408	0.0947075	0.111392	0.062212	0.256369	0.0894373	0.719983	0.279639
148544		0.15454	0.0859277	79	129.5	75	74.5	71.5	70.5	21	22.5	9	2.5	3	-9.5	17.5	-1.33333	0.111702	0.125	0.0459184	0.0139276	0.0151899	N/A	0.0942068	0.0145587	0.449482	0.0613088
148553		N/A	N/A	73	129	73.5	75.5	64.5	66.5	13.5	15	9	0	0	0	12.5	0	0.0718085	0.0833333	0.0459184	N/A	N/A	N/A	0.0670201	N/A	0.285908	N/A
148565		0.597013	0.167835	98.5	179.5	105	94.5	94	112	38.5	67.5	41	22	26.5	46.5	49	31.6667	0.204787	0.375	0.209184	0.122563	0.134177	0.214286	0.26299	0.157009	0.368942	0.318086
148394		N/A	N/A	72	117	76	72	65.5	57.5	13	5	5.5	-2	-3.5	-5	7.83333	-3.5	0.0691489	0.0277778	0.0280612	N/A	N/A	N/A	0.0416626	N/A	0.571357	N/A
148432		0.56635	0.519141	149	443	110.5	190	143.5	153.5	90	333.5	39	116	73.5	90	154.167	93.1667	0.478723	1.85278	0.19898	0.64624	0.372152	0.414747	0.843494	0.477713	1.04943	0.308751
148417		1.21535	0.21738	6991.5	4615.5	7491	7704	8670.5	7701	6931	4505	7425.5	7632.5	8603.5	7635	6287.17	7957	36.867	25.0278	37.8852	42.5209	43.562	35.1843	33.26	40.4224	0.214897	0.112959
148244		0.158068	0.341687	125.5	802.5	128.5	115	107.5	123	66	694	60.5	42.5	40.5	59	273.5	47.3333	0.351064	3.85556	0.308673	0.236769	0.205063	0.271889	1.5051	0.237907	1.35251	0.140507
148372		0.524988	0.387303	76.5	117.5	69	77.5	73	62.5	17	10	4	5	6	-3	10.3333	2.66667	0.0904255	0.0555556	0.0204082	0.0278552	0.0303797	N/A	0.0554631	0.0291175	0.631209	0.0613088
148366		0.167931	N/A	76	117.5	78.5	72	69	61.5	16.5	8.5	9	-2.5	2	-3	11.3333	-1.16667	0.087766	0.0472222	0.0459184	N/A	0.0101266	N/A	0.0603022	0.0101266	0.394567	N/A
148479		0.374479	0.0929106	78	124	78.5	76.5	78.5	68	19.5	15.5	9	2.5	11.5	3.5	14.6667	5.83333	0.103723	0.0861111	0.0459184	0.0139276	0.0582278	0.016129	0.0785843	0.0294282	0.377028	0.848356
148184		N/A	N/A	69.5	124.5	68	72	67	65.5	10	17	5.5	-1.5	-2.5	0	10.8333	-1.33333	0.0531915	0.0944444	0.0280612	N/A	N/A	N/A	0.0585657	N/A	0.572286	N/A
148250	hsa-let-7f-2-3p	0.209645	0.0112259	79	125	84	75.5	75.5	67.5	19.5	12.5	16.5	2	8	0.5	16.1667	3.5	0.103723	0.0694444	0.0841837	0.0111421	0.0405063	0.00230415	0.0857838	0.0179842	0.20045	1.11204
148260		0.553265	0.0550901	102.5	134.5	105.5	97	90.5	83	44	25	40.5	23.5	22	17	36.5	20.8333	0.234043	0.138889	0.206633	0.130919	0.111392	0.078341	0.193188	0.106884	0.25354	0.248656
148606		N/A	N/A	66.5	111.5	68	70.5	66.5	64	6	-1	7	-2.5	-1.5	-1.5	4	-1.83333	0.0319149	N/A	0.0357143	N/A	N/A	N/A	0.0338146	N/A	0.0794502	N/A
148226		0.198848	0.23664	80.5	201.5	83	80.5	79.5	76	20	91.5	18.5	7	11.5	9.5	43.3333	9.33333	0.106383	0.508333	0.0943878	0.0389972	0.0582278	0.0437788	0.236368	0.0470013	0.996773	0.213018
148055		0.78623	0.672633	92.5	174	82	115	103.5	89.5	33.5	66.5	16.5	44	36.5	14.5	38.8333	31.6667	0.178191	0.369444	0.0841837	0.245125	0.18481	0.0668203	0.210607	0.165585	0.690229	0.547717
148655		0.537504	0.0162223	110	142	121	98	95.5	100.5	51	35	56.5	25.5	26.5	28	47.5	26.6667	0.271277	0.194444	0.288265	0.142061	0.134177	0.129032	0.251329	0.13509	0.198904	0.0485773
148095		N/A	N/A	66	105	75.5	68.5	64.5	64	7.5	0.5	9	-5.5	-1	-9	5.66667	-5.16667	0.0398936	0.00277778	0.0459184	N/A	N/A	N/A	0.0295299	N/A	0.791165	N/A
148127		N/A	N/A	67	118	66.5	67	59	66.5	8.5	7.5	0.5	-8	-7	-10	5.5	-8.33333	0.0452128	0.0416667	0.00255102	N/A	N/A	N/A	0.0298102	N/A	0.794145	N/A
148096		0.17355	N/A	78.5	150.5	78	74	73	69	19.5	43.5	9.5	-2.5	4.5	-2	24.1667	0	0.103723	0.241667	0.0484694	N/A	0.0227848	N/A	0.131286	0.0227848	0.757917	N/A
148324		0.223121	0.168036	77	133	74.5	75	73	71	18.5	23.5	6.5	2	5.5	-2	16.1667	1.83333	0.0984043	0.130556	0.0331633	0.0111421	0.0278481	N/A	0.0873744	0.0194951	0.567949	0.605945
148409		0.332931	0.125555	120	295.5	171.5	111.5	119	115.5	60.5	191.5	106	39	51	36	119.333	42	0.321809	1.06389	0.540816	0.21727	0.258228	0.165899	0.642171	0.213799	0.593738	0.216383
148029		0.151068	0.0483334	83	144	76.5	75.5	72.5	69.5	23.5	32.5	11	1.5	5.5	4	22.3333	3.66667	0.125	0.180556	0.0561224	0.00835655	0.0278481	0.0184332	0.120559	0.0182126	0.517051	0.535214
46367	hsa-miR-1283	0.0951899	N/A	66.5	104	65	64.5	67	57.5	5	-6	-2	-9.5	0.5	-7.5	-1	-5.5	0.0265957	N/A	N/A	N/A	0.00253165	N/A	0.0265957	0.00253165	N/A	N/A
30147	spike_control_v2_47	0.679439	0.132807	2786.5	1586	2842	1720	1660.5	1757.5	2727	1474	2773	1645	1593	1693	2324.67	1643.67	14.5053	8.18889	14.148	9.16435	8.06582	7.80184	12.2807	8.344	0.288919	0.0866003
145999	hsa-miR-517a-3p/hsa-miR-517b-3p	0.309755	0.0118478	79.5	128.5	82	77	79	66.5	20	19	14.5	3.5	10	4	17.8333	5.83333	0.106383	0.105556	0.0739796	0.0194986	0.0506329	0.0184332	0.095306	0.0295216	0.193837	0.619571
146189		1.28972	0.512002	4894	1212.5	5666.5	5202.5	6241	3986	4832.5	1104.5	5599.5	5131	6172.5	3922	3845.5	5075.17	25.7048	6.13611	28.5689	28.585	31.2532	18.0737	20.1366	25.9706	0.606312	0.268296
145723	hsa-miR-519c-3p	0.0902458	N/A	69.5	113.5	76	69.5	68.5	61	8.5	1.5	6	-3	0.5	-5.5	5.33333	-2.66667	0.0452128	0.00833333	0.0306122	N/A	0.00253165	N/A	0.0280528	0.00253165	0.662054	N/A
168563	hsa-miR-4761-5p	N/A	N/A	66.5	105.5	70	64	61.5	59.5	7	-1	-1.5	-10	-6.5	-5	1.5	-7.16667	0.037234	N/A	N/A	N/A	N/A	N/A	0.037234	N/A	N/A	N/A
168635	hsa-miR-378e	0.682722	0.387921	139	129	141.5	103	109	110.5	77	19	72.5	30.5	43	47	56.1667	40.1667	0.409574	0.105556	0.369898	0.169916	0.217722	0.21659	0.295009	0.201409	0.560209	0.135443
168803	hsa-miR-4696	N/A	N/A	60.5	98	63	63	59	53	0.5	-8	-3.5	-10	-9.5	-13.5	-3.66667	-11	0.00265957	N/A	N/A	N/A	N/A	N/A	0.00265957	N/A	N/A	N/A
168692	hsa-miR-3688-5p	0.421394	N/A	67.5	104	77	71.5	73	64.5	8	-6.5	10.5	-0.5	4	-1	4	0.833333	0.0425532	N/A	0.0535714	N/A	0.0202532	N/A	0.0480623	0.0202532	0.162104	N/A
168739	hsa-miR-1269b	0.47734	N/A	75	117	71	78	66	62	13.5	5	4.5	3.5	-1.5	-3	7.66667	-0.333333	0.0718085	0.0277778	0.0229592	0.0194986	N/A	N/A	0.0408485	0.0194986	0.659025	N/A
168711	hsa-miR-548ak	0.947815	N/A	63.5	109	66.5	67.5	69	62	3.5	1.5	1	-8	2	-2	2	-2.66667	0.018617	0.00833333	0.00510204	N/A	0.0101266	N/A	0.0106841	0.0101266	0.660559	N/A
168768	hsa-miR-4423-5p	0.0683961	0.358601	90.5	919.5	96.5	99	82.5	90	31	811	31.5	25	15	25	291.167	21.6667	0.164894	4.50556	0.160714	0.139276	0.0759494	0.115207	1.61039	0.110144	1.55695	0.290214
168589	hsa-miR-4671-3p	N/A	N/A	65	107.5	67.5	65	64.5	63	5.5	-0.5	4	-8.5	-3.5	-6	3	-6	0.0292553	N/A	0.0204082	N/A	N/A	N/A	0.0248317	N/A	0.251931	N/A
168923	hsa-miR-4688	0.626887	0.374283	88	114.5	79	83.5	77.5	82.5	28.5	8	13.5	11.5	11.5	9.5	16.6667	10.8333	0.151596	0.0444444	0.0688776	0.0640669	0.0582278	0.0437788	0.0883059	0.0553578	0.635921	0.188665
168772	hsa-miR-224-5p	1.59775	4.48107e-05	115.5	163	119	155.5	156.5	172.5	55.5	50.5	52	81	88	97	52.6667	88.6667	0.295213	0.280556	0.265306	0.451253	0.44557	0.447005	0.280358	0.447943	0.05334	0.00659848
168973	hsa-miR-1268b	0.428613	0.020918	125.5	192.5	126.5	106	94	109.5	65.5	88	59	34.5	27	34.5	70.8333	32	0.348404	0.488889	0.30102	0.192201	0.136709	0.158986	0.379438	0.162632	0.257495	0.171706
168793	hsa-miR-4483	0.886138	0.47426	122	151	115.5	128	116.5	118.5	63.5	44.5	53.5	55	50.5	43	53.8333	49.5	0.337766	0.247222	0.272959	0.306407	0.255696	0.198157	0.285982	0.25342	0.163142	0.21372
168731	hsa-miR-548ah-3p	N/A	N/A	62	108.5	72	66.5	65.5	65	3	1	5.5	-6	-2	-9	3.16667	-5.66667	0.0159574	0.00555556	0.0280612	N/A	N/A	N/A	0.0165247	N/A	0.681618	N/A
168950	hsa-miR-4646-3p	0.584399	0.132489	156	275.5	158	144.5	137	149	97	163	92	71	70.5	76.5	117.333	72.6667	0.515957	0.905556	0.469388	0.395543	0.356962	0.352535	0.6303	0.368347	0.379998	0.0642241
168578	hsa-miR-5190	0.229076	0.0289973	99.5	168	94.5	88	77.5	82.5	45	60.5	29	14	10.5	7.5	44.8333	10.6667	0.239362	0.336111	0.147959	0.0779944	0.0531646	0.0345622	0.241144	0.0552404	0.390176	0.394465
168722	hsa-miR-4742-3p	0.143259	0.367286	91.5	646	103	93.5	89	117.5	30.5	535	36.5	23	19.5	54	200.667	32.1667	0.162234	2.97222	0.186224	0.128134	0.0987342	0.248848	1.10689	0.158572	1.45946	0.501673
168893	hsa-miR-4505	0.854641	0.387139	250.5	224.5	222.5	208	204	196	190	111.5	154.5	137	135.5	134	152	135.5	1.01064	0.619444	0.788265	0.763231	0.686076	0.617512	0.806116	0.68894	0.243398	0.105818
168789	hsa-miR-4686	0.516992	0.147046	79.5	136	80.5	85.5	73	82.5	18.5	25.5	13	9	5	18	19	10.6667	0.0984043	0.141667	0.0663265	0.0501393	0.0253165	0.0829493	0.102132	0.0528017	0.370188	0.547492
168561	hsa-miR-1245b-5p	N/A	N/A	63	94.5	56	62.5	60	54	3.5	-17	-10	-10	-7.5	-10	-7.83333	-9.16667	0.018617	N/A	N/A	N/A	N/A	N/A	0.018617	N/A	N/A	N/A
168627	hsa-miR-4678	N/A	N/A	66.5	116	69.5	73.5	67.5	61.5	6	4	4	0	-3	-3	4.66667	-2	0.0319149	0.0222222	0.0204082	N/A	N/A	N/A	0.0248484	N/A	0.248973	N/A
169166	hsa-miR-4683	1.29883	0.649161	70.5	113.5	75	91.5	79.5	68.5	11	7	11	21	14	2.5	9.66667	12.5	0.0585106	0.0388889	0.0561224	0.116992	0.0708861	0.0115207	0.051174	0.0664662	0.209208	0.795505
169307	hsa-miR-4685-3p	0.277376	0.293933	87	209.5	80	88.5	81	78	27	102.5	13.5	15	14.5	13	47.6667	14.1667	0.143617	0.569444	0.0688776	0.0835655	0.0734177	0.0599078	0.260646	0.072297	1.03598	0.164164
169257	hsa-miR-4740-5p	N/A	N/A	62.5	97.5	63	66	65.5	59.5	2.5	-8	-4.5	-8.5	-2.5	-5.5	-3.33333	-5.5	0.0132979	N/A	N/A	N/A	N/A	N/A	0.0132979	N/A	N/A	N/A
169269	hsa-miR-4499	0.355262	0.0898941	75.5	123	72.5	75	76	66	16.5	14	7	3	9	2	12.5	4.66667	0.087766	0.0777778	0.0357143	0.0167131	0.0455696	0.00921659	0.067086	0.0238331	0.411768	0.805347
169165	hsa-miR-5585-5p	N/A	N/A	67.5	107	65	67	63.5	61.5	7	-0.5	-2	-7	-1.5	-4	1.5	-4.16667	0.037234	N/A	N/A	N/A	N/A	N/A	0.037234	N/A	N/A	N/A
169298	hsa-miR-4433-5p	0.272143	0.01903	83	129	78.5	75	74	71.5	21	21.5	12.5	3	8	5	18.3333	5.33333	0.111702	0.119444	0.0637755	0.0167131	0.0405063	0.0230415	0.0983074	0.0267536	0.306742	0.460623
169236	hsa-miR-659-5p	0.869136	0.636155	116.5	142	92.5	107.5	107.5	96.5	56	30	27.5	36	36	31	37.8333	34.3333	0.297872	0.166667	0.140306	0.200557	0.182278	0.142857	0.201615	0.175231	0.418604	0.168284
169162	hsa-miR-5691	N/A	N/A	63.5	105.5	61	71	60	61.5	4.5	-5.5	-5	-4	-8	-3	-2	-5	0.0239362	N/A	N/A	N/A	N/A	N/A	0.0239362	N/A	N/A	N/A
169376	hsa-miR-5701	0.820795	0.124848	10268.5	13324	12651.5	10189	9737.5	11401.5	10208.5	13216.5	12587	10114	9671	11335	12004	10373.3	54.3005	73.425	64.2194	56.3454	48.9671	52.235	63.9816	52.5158	0.149487	0.0704009
169329	hsa-miR-370-3p	0.597543	0.399647	209.5	505	181	223.5	177	228	149.5	395	116	150.5	111	160.5	220.167	140.667	0.795213	2.19444	0.591837	0.83844	0.562025	0.739631	1.19383	0.713366	0.730842	0.196346
169179	hsa-miR-4650-5p	0.710888	0.331374	149	257.5	138.5	139.5	165	135	89.5	148	72.5	68.5	96.5	68.5	103.333	77.8333	0.476064	0.822222	0.369898	0.381616	0.488608	0.315668	0.556061	0.395297	0.425377	0.22079
169332		1.3569	0.519267	253.5	179	413	225.5	484	371.5	193	70.5	346.5	154	415	296	203.333	288.333	1.0266	0.391667	1.76786	0.857939	2.10127	1.36406	1.06204	1.44109	0.648544	0.433862
169073	hsa-miR-584-3p	N/A	N/A	63	105	63.5	68	61	63	3.5	-2.5	-1.5	-5	-7.5	-9	-0.166667	-7.16667	0.018617	N/A	N/A	N/A	N/A	N/A	0.018617	N/A	N/A	N/A
169274	hsa-miR-5196-3p	0.882814	0.770604	693	1711	673	965	1012.5	898.5	633	1603	608.5	893	944.5	828.5	948.167	888.667	3.36702	8.90556	3.10459	4.97493	4.78228	3.81797	5.12572	4.52506	0.639141	0.13699
169010	hsa-miR-2681-3p	0.546657	0.177897	288.5	604.5	341	271	218	309	230	497	275	200.5	149	233	334	194.167	1.2234	2.76111	1.40306	1.11699	0.75443	1.07373	1.79586	0.981718	0.468158	0.201709
169343	hsa-miR-5682	N/A	N/A	59	99.5	64	62.5	60	61	2	-7.5	-5	-10	-6.5	-11	-3.5	-9.16667	0.0106383	N/A	N/A	N/A	N/A	N/A	0.0106383	N/A	N/A	N/A
169135	hsa-miR-3173-5p	0.452958	0.123973	78.5	138	78.5	81.5	76	74	22	27.5	14.5	10	9.5	-1.5	21.3333	6	0.117021	0.152778	0.0739796	0.0557103	0.0481013	N/A	0.114593	0.0519058	0.344307	0.103657
169042	hsa-miR-4704-3p	N/A	N/A	58.5	105.5	57.5	62.5	63.5	55	-2	-7	-11.5	-11	-3.5	-9	-6.83333	-7.83333	N/A	N/A	N/A	N/A	N/A	N/A	N/A	N/A	N/A	N/A
169088	hsa-miR-4492	0.872872	0.86088	75	114	73	74	74.5	72	13	1	4.5	1	8	8.5	6.16667	5.83333	0.0691489	0.00555556	0.0229592	0.00557103	0.0405063	0.0391705	0.0325546	0.028416	1.00952	0.696635
169054	hsa-miR-4422	N/A	N/A	64.5	95.5	60.5	67.5	62	55	3	-16	-5.5	-6	-6	-9	-6.16667	-7	0.0159574	N/A	N/A	N/A	N/A	N/A	0.0159574	N/A	N/A	N/A
169411	hsa-miR-205-3p	0.102766	0.376239	99	1225	113	110.5	95.5	139.5	38	1114	45.5	37	25	75.5	399.167	45.8333	0.202128	6.18889	0.232143	0.206128	0.126582	0.347926	2.20772	0.226879	1.56171	0.494191
169417	hsa-miR-551b-5p	0.785791	0.450847	83.5	138.5	80.5	94	81	86	23	30	15	22	12.5	22	22.6667	18.8333	0.12234	0.166667	0.0765306	0.122563	0.0632911	0.101382	0.121846	0.0957454	0.369894	0.313698
169347		0.963335	0.757398	138	212	152.5	152.5	154.5	165.5	76.5	102	83	79	86.5	101.5	87.1667	89	0.406915	0.566667	0.423469	0.440111	0.437975	0.467742	0.465684	0.448609	0.188636	0.0370115
169393	hsa-miR-4747-5p	0.488761	0.113276	948.5	1775	946.5	639.5	611	737.5	888.5	1664	877	565	544.5	675	1143.17	594.833	4.72606	9.24444	4.47449	3.14763	2.75696	3.1106	6.14833	3.00506	0.436583	0.0717653
169150		0.0763563	N/A	65.5	127.5	66.5	72.5	64.5	61	5.5	21	-0.5	1	-2	-3.5	8.66667	-1.5	0.0292553	0.116667	N/A	0.00557103	N/A	N/A	0.072961	0.00557103	0.847153	N/A
168873		0.546961	0.186265	71.5	125.5	79.5	85.5	75	66.5	12.5	16	12.5	13.5	7	2	13.6667	7.5	0.0664894	0.0888889	0.0637755	0.0752089	0.035443	0.00921659	0.0730513	0.0399562	0.188672	0.831582
168907		N/A	N/A	56.5	95	60	65.5	60	57	-4.5	-13.5	-2.5	-7.5	-7	-8.5	-6.83333	-7.66667	N/A	N/A	N/A	N/A	N/A	N/A	N/A	N/A	N/A	N/A
168720		N/A	N/A	70	101.5	67	64	66	59	10	-7	1.5	-8.5	-1.5	-6.5	1.5	-5.5	0.0531915	N/A	0.00765306	N/A	N/A	N/A	0.0304223	N/A	1.05845	N/A
169348		0.731356	0.245378	89	166.5	108.5	105.5	101	99	29	55.5	44	32	34	33	42.8333	33	0.154255	0.308333	0.22449	0.178273	0.172152	0.152074	0.229026	0.1675	0.336814	0.0818225
42460	hsa-miR-223-5p	0.244104	0.0294353	91.5	150	81	77	78	64.5	25.5	21	13	4.5	9.5	1	19.8333	5	0.135638	0.116667	0.0663265	0.0250696	0.0481013	0.00460829	0.10621	0.0259264	0.337249	0.839266
14297		N/A	N/A	77.5	136	66.5	73	66	62.5	13	3	0	-0.5	-0.5	-0.5	5.33333	-0.5	0.0691489	0.0166667	N/A	N/A	N/A	N/A	0.0429078	N/A	0.864891	N/A
42859	hsa-miR-675-3p	0.623463	0.173569	90	169.5	86.5	90.5	91.5	78.5	26.5	39	22	17	25.5	15	29.1667	19.1667	0.140957	0.216667	0.112245	0.0947075	0.129114	0.0691244	0.156623	0.0976486	0.344424	0.308276
46211		0.267247	0.0184444	88.5	147	78.5	80.5	75.5	66	24.5	19.5	13.5	5	8	3	19.1667	5.33333	0.130319	0.108333	0.0688776	0.0278552	0.0405063	0.0138249	0.10251	0.0273955	0.303697	0.487185
17513		0.329125	N/A	78	138.5	69.5	73	70	62.5	15	11.5	3.5	-1.5	3.5	0	10	0.666667	0.0797872	0.0638889	0.0178571	N/A	0.0177215	N/A	0.0538444	0.0177215	0.597345	N/A
42905	hcmv-miR-US25-1-5p	0.049654	0.0777438	78	137.5	71.5	70.5	66.5	61.5	15	9.5	5.5	0.5	0.5	-2.5	10	-0.5	0.0797872	0.0527778	0.0280612	0.00278552	0.00253165	N/A	0.0535421	0.00265858	0.483199	0.0675221
16528		1.22539	0.43929	157.5	248.5	146.5	211.5	154.5	232	94	125	78	134	85.5	167.5	99	129	0.5	0.694444	0.397959	0.746518	0.432911	0.771889	0.530801	0.65044	0.283766	0.290283
11277	hsa-miR-7-1-3p	0.661423	0.198952	76	124.5	77	79.5	75.5	69	11	-2	10	5	10.5	6	6.33333	7.16667	0.0585106	N/A	0.0510204	0.0278552	0.0531646	0.0276498	0.0547655	0.0362232	0.0967103	0.405046
17818	hsa-miR-27a-5p	1.22727	0.443572	107.5	144	110.5	124	109	109	44	17.5	44.5	49	40	45.5	35.3333	44.8333	0.234043	0.0972222	0.227041	0.272981	0.202532	0.209677	0.186102	0.228397	0.414029	0.169774
17652	hsa-miR-558	0.121783	N/A	72	116	72.5	66	66.5	63.5	7	-10	9	-5	1	0	2	-1.33333	0.037234	N/A	0.0459184	N/A	0.00506329	N/A	0.0415762	0.00506329	0.147699	N/A
27572		0.304	0.0347258	131	190.5	100	94	80.5	87.5	66	69	34	17.5	12.5	25	56.3333	18.3333	0.351064	0.383333	0.173469	0.097493	0.0632911	0.115207	0.302622	0.0919972	0.373427	0.286866
42483	hsa-miR-522-3p	0.389937	0.084855	79.5	144.5	74	78	74.5	69.5	15	20.5	9	4	9.5	5	14.8333	6.16667	0.0797872	0.113889	0.0459184	0.0222841	0.0481013	0.0230415	0.0798648	0.0311423	0.425536	0.471763
28520	hsa-miR-454-5p	0.223433	0.0455756	81	148	76.5	80	74.5	64	15.5	24.5	11	3	7	2	17	4	0.0824468	0.136111	0.0561224	0.0167131	0.035443	0.00921659	0.0915601	0.0204576	0.445233	0.660305
14303		0.908475	0.491784	158.5	116	193.5	155.5	173	188.5	94	-9	126.5	83	105	123	70.5	103.667	0.5	N/A	0.645408	0.462396	0.531646	0.56682	0.572704	0.520287	0.179533	0.102118
11266		0.325483	0.00170619	85	142	78	78.5	71.5	70	20.5	18.5	16.5	7	4.5	7.5	18.5	6.33333	0.109043	0.102778	0.0841837	0.0389972	0.0227848	0.0345622	0.098668	0.0321147	0.131035	0.2609
32884	hsa-miR-342-3p	1.48386	0.209627	172.5	163.5	232.5	211	229	252.5	109	43	167	137.5	164.5	191	106.333	164.333	0.579787	0.238889	0.852041	0.766017	0.832911	0.880184	0.556906	0.826371	0.551648	0.069417
17529	hcmv-miR-US25-2-3p	0.531917	0.466046	78.5	125.5	72	87	72	70	14.5	1.5	11	-1	4	6.5	9	3.16667	0.0771277	0.00833333	0.0561224	N/A	0.0202532	0.0299539	0.0471945	0.0251035	0.747025	0.273247
46844		0.592427	N/A	79	120.5	63.5	68	71	57.5	12.5	0.5	1.5	-6.5	3	-5.5	4.83333	-3	0.0664894	0.00277778	0.00765306	N/A	0.0151899	N/A	0.0256401	0.0151899	1.38301	N/A
19596	hsa-miR-30d-5p	1.25555	0.289572	381.5	314	500	410.5	514.5	523	318	193	433	336.5	446.5	457.5	314.667	413.5	1.69149	1.07222	2.20918	1.87465	2.26076	2.10829	1.65763	2.08124	0.343403	0.0934401
11102	hsa-miR-410-3p	1.32105	0.450173	148	148.5	178.5	172.5	159	165.5	83	19	115	99.5	93.5	102	72.3333	98.3333	0.441489	0.105556	0.586735	0.554318	0.473418	0.470046	0.377927	0.49926	0.653055	0.0955626
42736	hsa-miR-148b-5p	0.371698	0.0912674	80	145	73.5	75	75	65.5	15	15	9	-1	7.5	3	13	3.16667	0.0797872	0.0833333	0.0459184	N/A	0.0379747	0.0138249	0.0696796	0.0258998	0.296415	0.659329
11256		1.05879	0.637565	177.5	230.5	206	211	193.5	191	113	100	141.5	137	126.5	127	118.167	130.167	0.601064	0.555556	0.721939	0.763231	0.640506	0.585253	0.626186	0.662997	0.137323	0.1374
46248		1.05162	0.762921	124	199	152	161	146	131	62	69.5	86	89.5	79	68.5	72.5	79	0.329787	0.386111	0.438776	0.498607	0.4	0.315668	0.384891	0.404758	0.14161	0.226215
11005	hsa-miR-204-5p	0.55297	0.130288	96.5	181	93	95	91	79	32	50.5	27	22.5	24.5	16.5	36.5	21.1667	0.170213	0.280556	0.137755	0.125348	0.124051	0.0760369	0.196174	0.108479	0.381581	0.259063
46266	hsa-miR-1825	0.512034	0.0134481	131.5	201	126	112	108.5	93	64.5	75.5	57.5	36	38.5	31.5	65.8333	35.3333	0.343085	0.419444	0.293367	0.200557	0.194937	0.145161	0.351966	0.180218	0.180432	0.169184
31349	hsa-miR-524-3p	0.167778	0.0328982	97.5	164	81	76.5	79.5	67.5	30.5	38	16	3	9.5	2.5	28.1667	5	0.162234	0.211111	0.0816327	0.0167131	0.0481013	0.0115207	0.151659	0.025445	0.431123	0.777829
46734		0.519531	0.00375545	90	150.5	88.5	88	82.5	77	24.5	27.5	23.5	11.5	15.5	14.5	25.1667	13.8333	0.130319	0.152778	0.119898	0.0640669	0.078481	0.0668203	0.134332	0.0697894	0.125087	0.109645
10986	hsa-miR-193a-3p	1.40409	0.181593	1154	1224.5	1953	1420.5	2239	2614.5	1090	1099.5	1888	1346	2171.5	2549.5	1359.17	2022.33	5.79787	6.10833	9.63265	7.49861	10.9949	11.7488	7.17962	10.0808	0.296681	0.224961
17391	hsa-miR-635	0.588438	0.0975398	96	160.5	82.5	92	86	79.5	32.5	34.5	19.5	19.5	17	17	28.8333	17.8333	0.172872	0.191667	0.0994898	0.108635	0.0860759	0.078341	0.154676	0.0910174	0.314903	0.172933
42796		2.37773	0.126364	237.5	309.5	108.5	549.5	343.5	318	175.5	187.5	43	474	276.5	255.5	135.333	335.333	0.933511	1.04167	0.219388	2.64067	1.4	1.17742	0.731522	1.73936	0.610789	0.453297
42858		0.301	0.0661361	95	173.5	89	89.5	78.5	75	32	52.5	22	12.5	9	12.5	35.5	11.3333	0.170213	0.291667	0.112245	0.0696379	0.0455696	0.0576037	0.191375	0.0576037	0.478452	0.208912
46623	hsa-miR-1273a	0.479961	0.11612	85	131	82.5	83	81	68	20	9	20.5	10.5	10	3.5	16.5	8	0.106383	0.05	0.104592	0.0584958	0.0506329	0.016129	0.0869916	0.0417526	0.368405	0.539756
18739	hsa-miR-186-5p	0.966149	0.892639	539.5	317	490.5	387	411	517.5	473	192.5	424	310.5	343	453	363.167	368.833	2.51596	1.06944	2.16327	1.72981	1.73671	2.08756	1.91622	1.85136	0.393606	0.110505
42451	hsa-miR-139-3p	0.239033	0.0620003	93	171	86.5	82.5	74.5	68	26.5	49	21	11	7	6	32.1667	8	0.140957	0.272222	0.107143	0.0612813	0.035443	0.0276498	0.173441	0.041458	0.502776	0.424625
17394		0.460697	0.0510535	93.5	163.5	93	87	87.5	76.5	30.5	46.5	28.5	17.5	19.5	14	35.1667	17	0.162234	0.258333	0.145408	0.097493	0.0987342	0.0645161	0.188659	0.0869144	0.322932	0.223294
42790		1.3388	0.279306	144	157	156.5	167.5	186	147	81	37	92	90	116	85	70	97	0.430851	0.205556	0.469388	0.501393	0.587342	0.391705	0.368598	0.49348	0.386621	0.198707
25117		1.41214	0.23361	1059.5	592	1059	1444	927	1455.5	996	472.5	994	1361.5	860.5	1390.5	820.833	1204.17	5.29787	2.625	5.07143	7.58496	4.35696	6.40783	4.33143	6.11658	0.342184	0.267075
17863	hsa-miR-934	0.990033	0.9673	112.5	203.5	117	133	123.5	143.5	48	85.5	51.5	58.5	57	80	61.6667	65.1667	0.255319	0.475	0.262755	0.325905	0.288608	0.368664	0.331025	0.327725	0.376835	0.122233
42509	hsa-miR-219a-5p	0.91435	0.617309	111.5	155	119.5	112.5	116	102.5	46	31.5	49.5	33	50.5	38	42.3333	40.5	0.244681	0.175	0.252551	0.183844	0.255696	0.175115	0.224077	0.204885	0.190488	0.215826
42929	hsa-miR-25-5p	2.13295	0.0336865	544.5	261.5	623.5	856	1070	884.5	477	144.5	558	779.5	1000.5	822	393.167	867.333	2.53723	0.802778	2.84694	4.34262	5.06582	3.78802	2.06232	4.39882	0.534219	0.145665
5730		0.680778	0.388488	103	190.5	87	110	97.5	83.5	40	61	21	35	30.5	21.5	40.6667	29	0.212766	0.338889	0.107143	0.194986	0.15443	0.0990783	0.219599	0.149498	0.528344	0.322035
42682	hsa-miR-25-3p	1.47348	0.283019	252	159	253	284	257	284	188.5	33.5	190	213.5	192	221	137.333	208.833	1.00266	0.186111	0.969388	1.18942	0.972152	1.01843	0.719386	1.06	0.642394	0.107963
11168	hsa-miR-520d-3p	0.244536	0.036418	97	167	81	78	82	69	33.5	38	18	5.5	14	3.5	29.8333	7.66667	0.178191	0.211111	0.0918367	0.0306407	0.0708861	0.016129	0.16038	0.0392186	0.384087	0.723342
17854	hsa-miR-106b-3p	0.914615	0.468092	152.5	212.5	142.5	158.5	134.5	151	90.5	81.5	75.5	83	66	89	82.5	79.3333	0.481383	0.452778	0.385204	0.462396	0.334177	0.410138	0.439788	0.402237	0.112299	0.160287
14279	hsa-miR-362-5p	0.396855	0.0491546	96	150.5	83.5	81	82	72.5	31.5	21.5	18	5	16	9	23.6667	10	0.167553	0.119444	0.0918367	0.0278552	0.0810127	0.0414747	0.126278	0.0501142	0.303441	0.550978
14300	hsa-miR-29c-5p	0.573176	0.0309156	114.5	162	105	96	91	98	50	33.5	41	19.5	22	34.5	41.5	25.3333	0.265957	0.186111	0.209184	0.108635	0.111392	0.158986	0.220417	0.126338	0.186426	0.224064
17460	hsa-miR-657	0.677611	0.000272687	92.5	159	96.5	94.5	90	90.5	28.5	29	32	18.5	21.5	24	29.8333	21.3333	0.151596	0.161111	0.163265	0.103064	0.108861	0.110599	0.158657	0.107508	0.039139	0.0366992
17853	hsa-miR-30d-3p	0.462076	0.00831866	137	210	127	106.5	108.5	102	72.5	81.5	60.5	30	38	37	71.5	35	0.385638	0.452778	0.308673	0.167131	0.192405	0.170507	0.382363	0.176681	0.188585	0.0776637
46390		1.07236	0.839806	259	347.5	598	353	474	443.5	193.5	220.5	533	273.5	407.5	379	315.667	353.333	1.02926	1.225	2.71939	1.52368	2.06329	1.74654	1.65788	1.77784	0.557632	0.152525
42868		0.924452	0.595277	228	297.5	221.5	231	253	195.5	164	173	151.5	156.5	184	131.5	162.833	157.333	0.87234	0.961111	0.772959	0.871866	0.931646	0.605991	0.868804	0.803168	0.10834	0.215841
27571		0.44331	0.0120387	97	163.5	93	89	85	78.5	33	38.5	27	15	16	15	32.8333	15.3333	0.175532	0.213889	0.137755	0.0835655	0.0810127	0.0691244	0.175725	0.0779008	0.216629	0.0989339
42751		0.813088	0.621682	23665	57606	26095.5	35435.5	30625	25670	23598.5	57482.5	26030	35359.5	30555	25607	35703.7	30507.2	125.524	319.347	132.806	196.989	154.709	118.005	192.559	156.567	0.570537	0.252447
42752		1.06654	0.693713	1593	2127.5	1679	2201.5	1869.5	1876	1527	2000	1614.5	2124	1798.5	1814	1713.83	1912.17	8.12234	11.1111	8.23724	11.8329	9.10633	8.35945	9.1569	9.76622	0.184929	0.187209
10998	hsa-miR-19b-3p	2.26893	0.0699693	322.5	151.5	533.5	533	716	733.5	255.5	31	469	459	645	668.5	251.833	590.833	1.35904	0.172222	2.39286	2.5571	3.26582	3.08065	1.30804	2.96786	0.849512	0.123852
17530	hsa-miR-641	0.792403	0.691356	78	126.5	65	85	74.5	71	13	6.5	3	9.5	2.5	6.5	7.5	6.16667	0.0691489	0.0361111	0.0153061	0.0529248	0.0126582	0.0299539	0.0401887	0.0318456	0.675613	0.634304
42869	hsa-miR-936	0.543502	0.0764167	112.5	173.5	92.5	97	100	81	46.5	51.5	31	23.5	32	18	43	24.5	0.24734	0.286111	0.158163	0.130919	0.162025	0.0829493	0.230538	0.125298	0.284586	0.317935
42447	hsa-miR-556-3p	0.185992	0.134873	86	140	72.5	76.5	71.5	62.5	21.5	21.5	7	1	5.5	-1	16.6667	1.83333	0.114362	0.119444	0.0357143	0.00557103	0.0278481	N/A	0.0898401	0.0167096	0.522519	0.94271
17511		1.23436	0.356837	159	187.5	143.5	206.5	159	157.5	97	69.5	78	127.5	92	93	81.5	104.167	0.515957	0.386111	0.397959	0.710306	0.465823	0.428571	0.433343	0.5349	0.165669	0.286117
46258	hsa-miR-1184	2.05939	0.00832415	240.5	216.5	232.5	372	339.5	439.5	179	94.5	163	297	270.5	375.5	145.5	314.333	0.952128	0.525	0.831633	1.6546	1.36962	1.73041	0.769587	1.58488	0.286153	0.12003
146122	hsa-miR-2053	0.338454	0.0645163	84.5	135	79.5	76	76	63	20.5	12.5	14.5	2.5	8.5	-2	15.8333	3	0.109043	0.0694444	0.0739796	0.0139276	0.043038	N/A	0.0841555	0.0284828	0.25752	0.722688
146000	hsa-miR-1911-5p	0.151816	0.0985825	85	137.5	69.5	78.5	68.5	66.5	21.5	17	3.5	2	0.5	4.5	14	2.33333	0.114362	0.0944444	0.0178571	0.0111421	0.00253165	0.0207373	0.0755544	0.0114703	0.674349	0.793985
24136	spike_control_v2_12	0.591871	0.195856	1708	2727.5	1303.5	1458	1004	1152.5	1644.5	2599.5	1239.5	1387	934.5	1087	1827.83	1136.17	8.74734	14.4417	6.32398	7.72702	4.73165	5.00922	9.83766	5.82263	0.4236	0.28425
46202	5S_rRNA	0.744988	0.408476	4911	12501.5	8281	5887.5	7172	7286	4847.5	12372.5	8215.5	5815.5	7102	7223	8478.5	6713.5	25.7846	68.7361	41.9158	32.3983	35.9595	33.2857	45.4788	33.8812	0.477064	0.0547134
146042	hsv1-miR-H8-3p	0.281743	0.324152	176	727	157.5	154	147	144.5	110	598.5	92	79.5	82.5	81	266.833	81	0.585106	3.325	0.469388	0.442897	0.417722	0.373272	1.45983	0.411297	1.1072	0.0857151
25593	spike_control_v2_18	1.12557	0.799332	1883.5	290.5	1443.5	1517	1155.5	1421	1819.5	159	1377.5	1442	1088.5	1357	1118.67	1295.83	9.67819	0.883333	7.02806	8.03343	5.51139	6.25346	5.8632	6.59942	0.769488	0.196399
13417	spike_control_v2_8	0.770194	0.535014	134	152.5	154	118.5	128.5	104	69	21.5	89.5	44.5	59	39	60	47.5	0.367021	0.119444	0.456633	0.247911	0.298734	0.179724	0.314366	0.242123	0.555569	0.246635
145662		0.669255	0.282916	95	199	108.5	101.5	98.5	115	31.5	69.5	48.5	26	29.5	52.5	49.8333	36	0.167553	0.386111	0.247449	0.144847	0.149367	0.241935	0.267038	0.178716	0.414128	0.306608
146065		0.373039	0.0875327	90	165	81.5	84.5	79	71	26	37	14.5	10	12.5	8	25.8333	10.1667	0.138298	0.205556	0.0739796	0.0557103	0.0632911	0.0368664	0.139278	0.0519559	0.472391	0.261887
146035	hsv1-miR-H2-5p	0.845429	0.00372091	91	154	96.5	95.5	95	92	26.5	27.5	28.5	22	25	26.5	27.5	24.5	0.140957	0.152778	0.145408	0.122563	0.126582	0.12212	0.146381	0.123755	0.0407835	0.0198663
5740		1.04086	0.904074	30296	11726	43692	23718	32869	36588.5	30230.5	11597	43627	23644	32799.5	36524.5	28484.8	30989.3	160.801	64.4278	222.587	131.721	166.073	168.316	149.272	155.37	0.533975	0.132014
146093		0.655569	0.211053	146.5	229.5	114	127	135	110	82.5	102	49.5	50.5	65	46.5	78	54	0.43883	0.566667	0.252551	0.281337	0.329114	0.214286	0.419349	0.274912	0.376682	0.209824
146191		0.221547	0.0346116	85.5	126	79	76.5	71	69.5	21.5	-0.5	13.5	2	3	7.5	11.5	4.16667	0.114362	N/A	0.0688776	0.0111421	0.0151899	0.0345622	0.0916196	0.020298	0.35104	0.616701
146070		0.353957	0.0951422	90	156.5	81.5	82.5	80	72.5	24.5	33	11.5	7	11.5	7.5	23	8.66667	0.130319	0.183333	0.0586735	0.0389972	0.0582278	0.0345622	0.124109	0.0439291	0.504087	0.286372
146108		0.368795	0.0845933	90	140	76	80.5	75.5	63.5	25.5	17.5	13.5	6.5	7.5	-0.5	18.8333	4.5	0.135638	0.0972222	0.0688776	0.0362117	0.0379747	N/A	0.100579	0.0370932	0.333137	0.0336077
146194		0.284982	0.0232495	83	142	78	81	73.5	66	17	18	12.5	8.5	4.5	0.5	15.8333	4.5	0.0904255	0.1	0.0637755	0.0473538	0.0227848	0.00230415	0.0847337	0.0241476	0.22153	0.934077
146102		1.29374	0.529979	511.5	180	607.5	559.5	545	488	445	62	540	487	475.5	423.5	349	462	2.36702	0.344444	2.7551	2.71309	2.40759	1.95161	1.82219	2.35743	0.71035	0.162554
145968	hsa-let-7d-5p	1.37611	0.531182	1426	297	2569.5	2195.5	2230	1388	1360.5	175.5	2499.5	2119.5	2162	1322.5	1345.17	1868	7.2367	0.975	12.7526	11.8078	10.9468	6.09447	6.98808	9.61637	0.843251	0.320317
145689	hsa-miR-543	0.964349	0.820608	153.5	180.5	160	141	164.5	151.5	89.5	60	94	63	97	87	81.1667	82.3333	0.476064	0.333333	0.479592	0.350975	0.491139	0.400922	0.429663	0.414345	0.194205	0.171451
146115	hsa-miR-940	0.284585	0.260557	107.5	306	109	97	97.5	85	44	177.5	38.5	25	33	21	86.6667	26.3333	0.234043	0.986111	0.196429	0.139276	0.167089	0.0967742	0.472194	0.13438	0.943388	0.263522
145714	hsa-miR-28-3p	1.3434	0.442223	142	141	151	152	146	155	75.5	11.5	90	79	76.5	90	59	81.8333	0.401596	0.0638889	0.459184	0.440111	0.387342	0.414747	0.308223	0.414067	0.692841	0.0637371
146178	hsa-miR-502-3p	0.663889	0.111171	138.5	236.5	135.5	131	125	129.5	76.5	107.5	69	56	57.5	64.5	84.3333	59.3333	0.406915	0.597222	0.352041	0.311978	0.291139	0.297235	0.452059	0.300117	0.28464	0.0356996
147963		2.99188	0.0258052	2659	431.5	3404	6663	7260	5304	2593.5	303.5	3338	6588.5	7191.5	5241.5	2078.33	6340.5	13.7952	1.68611	17.0306	36.7047	36.4127	24.1544	10.8373	32.4239	0.746365	0.220921
147867	hsa-miR-3118	0.4252	0.0871914	77.5	142	71.5	79	70	67.5	12	16.5	7	5.5	5	5.5	11.8333	5.33333	0.0638298	0.0916667	0.0357143	0.0306407	0.0253165	0.0253456	0.0637369	0.0271009	0.438934	0.113116
147841	kshv-miR-K12-11-5p	N/A	N/A	75	129	65.5	67	64.5	61.5	11.5	5.5	6	-3.5	-3	-2.5	7.66667	-3	0.0611702	0.0305556	0.0306122	N/A	N/A	N/A	0.0407793	N/A	0.433039	N/A
147925	hsa-miR-3126-5p	0.680359	0.0282833	78	133.5	76.5	84	75.5	71	13.5	10	12.5	9	8.5	8	12	8.5	0.0718085	0.0555556	0.0637755	0.0501393	0.043038	0.0368664	0.0637132	0.0433479	0.127551	0.153223
147853		0.216577	0.00382888	79	141.5	79.5	76	73	67	14.5	18	14.5	1	6	4	15.6667	3.66667	0.0771277	0.1	0.0739796	0.00557103	0.0303797	0.0184332	0.0837024	0.018128	0.169668	0.684421
147588	hsa-miR-4288	1.22575	0.247054	23803	13087	20879.5	21039.5	23825.5	29599.5	23738	12962	20814	20965	23758	29537	19171.3	24753.3	126.266	72.0111	106.194	116.797	120.294	136.115	101.49	124.402	0.270287	0.0827452
147649	hsa-miR-500a-5p/hsa-miR-500b-5p	1.00491	0.902112	109	161.5	111	112	113.5	113.5	43	38	46	39	45	50.5	42.3333	44.8333	0.228723	0.211111	0.234694	0.21727	0.227848	0.232719	0.224843	0.225946	0.0545312	0.0349557
147977	hsa-miR-3190-3p	0.43723	0.20539	84	130.5	73.5	72	76.5	65.5	18	11	9.5	-0.5	10	2	12.8333	3.83333	0.0957447	0.0611111	0.0484694	N/A	0.0506329	0.00921659	0.0684417	0.0299248	0.357608	0.978647
147857	hsa-miR-3130-5p	0.650315	0.467425	87	137	70	79.5	83	69.5	22	16	4	6.5	16	6.5	14	9.66667	0.117021	0.0888889	0.0204082	0.0362117	0.0810127	0.0299539	0.0754394	0.0490594	0.658686	0.567651
147569	hsa-miR-4256	N/A	N/A	78	131	74.5	72.5	69	63.5	12.5	11.5	9	0	-1	0	11	-0.333333	0.0664894	0.0638889	0.0459184	N/A	N/A	N/A	0.0587655	N/A	0.190617	N/A
147616	hsa-miR-4291	1.80438	0.181776	1034.5	212.5	1545.5	1411.5	1921.5	1582.5	968	91	1481	1336	1853.5	1521	846.667	1570.17	5.14894	0.505556	7.55612	7.4429	9.38481	7.00922	4.40354	7.94564	0.813868	0.159217
147815	hsv1-miR-H14-5p	0.219355	0.172171	78.5	138.5	70	78.5	71	62	13.5	15.5	4	1.5	3.5	-3.5	11	0.5	0.0718085	0.0861111	0.0204082	0.00835655	0.0177215	N/A	0.0594426	0.013039	0.581283	0.507863
147858		1.0574	0.754983	321.5	334.5	281	366.5	312	277	256.5	216	210	293	243.5	212.5	227.5	249.667	1.36436	1.2	1.07143	1.63231	1.23291	0.979263	1.21193	1.2815	0.121154	0.256906
147592		0.689346	0.152126	193.5	287	165	165	177.5	143.5	131	161	100.5	92.5	110.5	81.5	130.833	94.8333	0.696809	0.894444	0.512755	0.51532	0.559494	0.375576	0.701336	0.483463	0.272173	0.198584
148247	hsa-miR-2355-3p	0.243537	0.377446	148.5	916.5	137.5	156.5	128.5	165	82.5	787	75.5	83	63.5	104.5	315	83.6667	0.43883	4.37222	0.385204	0.462396	0.321519	0.481567	1.73209	0.421827	1.32013	0.207186
148072	hsa-miR-3668	N/A	N/A	68.5	126.5	67.5	70	64.5	58.5	4	-2.5	-2	-4.5	-2.5	-2.5	-0.166667	-3.16667	0.0212766	N/A	N/A	N/A	N/A	N/A	0.0212766	N/A	N/A	N/A
147997	hsa-miR-3934-5p	0.598644	0.0565931	121	225.5	147.5	117.5	119.5	111.5	57.5	93	79.5	45.5	51	48.5	76.6667	48.3333	0.305851	0.516667	0.405612	0.253482	0.258228	0.223502	0.409377	0.245071	0.257607	0.0768305
147682	hsv1-miR-H6-5p	0.580859	0.236515	94	174	87	96	93	82.5	30	50	20	24	20	17	33.3333	20.3333	0.159574	0.277778	0.102041	0.133705	0.101266	0.078341	0.179798	0.104437	0.498321	0.266359
148189	hsa-miR-3681-3p	0.65082	0.608765	77.5	130	71.5	75	79	66.5	13.5	-1	3	2	10.5	4.5	5.16667	5.66667	0.0718085	N/A	0.0153061	0.0111421	0.0531646	0.0207373	0.0435573	0.028348	0.917256	0.776802
148393	hsa-miR-676-3p	0.652291	0.350709	100	187	85.5	104.5	92	86	38	56.5	18.5	31.5	23.5	22.5	37.6667	25.8333	0.202128	0.313889	0.0943878	0.175487	0.118987	0.103687	0.203468	0.13272	0.53943	0.284953
148379	hsa-miR-3654	1.3245	0.58718	3551	336	6453	5299	4256.5	4174	3487.5	209.5	6383.5	5225.5	4187	4109.5	3360.17	4507.33	18.5505	1.16389	32.5689	29.1114	21.2	18.9378	17.4278	23.0831	0.90273	0.231418
147415	hsa-miR-495-5p	0.276952	0.288342	96.5	268.5	87	94.5	86	81.5	31.5	141	25	21	19.5	18	65.8333	19.5	0.167553	0.783333	0.127551	0.116992	0.0987342	0.0829493	0.359479	0.0995584	1.02263	0.171117
148165	hsa-miR-3605-5p	0.232054	0.0840501	78.5	131	69.5	72.5	72.5	65	14.5	6	6	1	4	1.5	8.83333	2.16667	0.0771277	0.0333333	0.0306122	0.00557103	0.0202532	0.00691244	0.0470244	0.0109122	0.555151	0.743869
148675		1.48971	0.356793	19989	3076.5	25139.5	25011.5	29342	18676	19924	2955.5	25075	24939.5	29273.5	18610.5	15984.8	24274.5	105.979	16.4194	127.934	138.939	148.22	85.7627	83.4439	124.307	0.707946	0.271115
147366		0.661285	0.140543	118	172	95	105	93.5	98.5	53	50	30	29.5	26.5	37.5	44.3333	31.1667	0.281915	0.277778	0.153061	0.164345	0.134177	0.172811	0.237585	0.157111	0.308221	0.129255
10904	spike_control_v1_d	1.44275	0.457222	87	128.5	83	95.5	81.5	89	20.5	0.5	17.5	20	13	24.5	12.8333	19.1667	0.109043	0.00277778	0.0892857	0.111421	0.0658228	0.112903	0.0670353	0.0967155	0.843117	0.276731
148405	hsa-miR-3669	N/A	N/A	70.5	121	61	68	67	59	5.5	-1	-4	-7.5	-2.5	-6	0.166667	-5.33333	0.0292553	N/A	N/A	N/A	N/A	N/A	0.0292553	N/A	N/A	N/A
14262	spike_control_v1_f	0.229375	0.186658	78.5	139.5	70.5	75	72.5	62	13.5	21.5	6	2	4.5	-1	13.6667	1.83333	0.0718085	0.119444	0.0306122	0.0111421	0.0227848	N/A	0.0739551	0.0169634	0.601108	0.485318
148032	hsa-miR-3685	1.22692	0.465665	574	326	692	584	715.5	597.5	507.5	204	620	511.5	646	534.5	443.833	564	2.69947	1.13333	3.16327	2.84958	3.27089	2.46313	2.33202	2.8612	0.45612	0.1412
148207		0.495694	0.107965	85.5	153	82	87.5	76.5	78.5	21	35	19.5	16	8	15.5	25.1667	13.1667	0.111702	0.194444	0.0994898	0.0891365	0.0405063	0.0714286	0.135212	0.0670238	0.382058	0.36722
148416		2.52749	0.0045802	167.5	172.5	162.5	287	312.5	275.5	102	49.5	103.5	211.5	246.5	211.5	85	223.167	0.542553	0.275	0.528061	1.17827	1.2481	0.974654	0.448538	1.13368	0.335452	0.125321
148559	hsa-miR-411-3p	0.995303	0.979515	147	176	165	149	163	144.5	82.5	54.5	101.5	72	96	79.5	79.5	82.5	0.43883	0.302778	0.517857	0.401114	0.486076	0.366359	0.419822	0.41785	0.259139	0.147392
148233		0.608691	0.298854	5413	1455.5	4674.5	1829	2409	3219.5	5349	1337.5	4610	1753	2340.5	3155.5	3765.5	2416.33	28.4521	7.43056	23.5204	9.76602	11.8506	14.5415	19.801	12.0527	0.555187	0.198639
148121		1.04074	0.801444	125	200.5	173	158.5	147	159	61.5	74.5	105.5	86	80.5	96.5	80.5	87.6667	0.327128	0.413889	0.538265	0.479109	0.407595	0.4447	0.426427	0.443801	0.248872	0.0805886
148201		0.528393	0.0344546	94	174.5	96.5	94.5	85	77.5	30.5	42	32	22.5	19	16	34.8333	19.1667	0.162234	0.233333	0.163265	0.125348	0.0962025	0.0737327	0.186278	0.0984278	0.218785	0.26293
148535		0.489637	0.0487944	88	152.5	79	85.5	80.5	73	25	22	15	12.5	11.5	7.5	20.6667	10.5	0.132979	0.122222	0.0765306	0.0696379	0.0582278	0.0345622	0.110577	0.0541426	0.271048	0.330444
148574		0.426909	0.0782599	85	138.5	76	78.5	75	66	20.5	9	14.5	5.5	9.5	4.5	14.6667	6.5	0.109043	0.05	0.0739796	0.0306407	0.0481013	0.0207373	0.077674	0.0331598	0.382292	0.41782
148173		0.549535	N/A	71	124	68.5	75	68.5	65	8.5	-5.5	1	-0.5	-1	3	1.33333	0.5	0.0452128	N/A	0.00510204	N/A	N/A	0.0138249	0.0251574	0.0138249	1.1274	N/A
148257		0.359996	0.120397	86	137.5	78	79.5	76.5	69.5	23	8.5	13	4.5	10	2	14.8333	5.5	0.12234	0.0472222	0.0663265	0.0250696	0.0506329	0.00921659	0.0786297	0.0283064	0.496519	0.738244
148587		0.57828	0.0172154	134	182.5	126	107.5	111.5	95.5	71	53.5	57.5	34.5	43.5	32	60.6667	36.6667	0.37766	0.297222	0.293367	0.192201	0.220253	0.147465	0.32275	0.18664	0.147459	0.196695
148676		1.32876	0.178557	16624.5	11068	12874	21266.5	16048.5	18655	16561.5	10941	12808	21193	15981	18590	13436.8	18588	88.0931	60.7833	65.3469	118.067	80.9165	85.6682	71.4078	94.8838	0.204865	0.213073
148050		0.240789	0.0294471	98	152.5	80.5	81	82	67	35	23.5	17	5	10.5	3.5	25.1667	6.33333	0.18617	0.130556	0.0867347	0.0278552	0.0531646	0.016129	0.134487	0.0323829	0.370551	0.584517
148278	hsa-miR-138-2-3p	1.3213	0.119318	1791.5	2776.5	1909.5	2716.5	2945.5	3266	1728	2650.5	1848	2642	2879.5	3203	2075.5	2908.17	9.19149	14.725	9.42857	14.7187	14.5797	14.7604	11.115	14.6863	0.281473	0.00643938
148426		0.233954	0.322757	91	302	90	91	86.5	81.5	27.5	176	23.5	20	20	17	75.6667	19	0.146277	0.977778	0.119898	0.111421	0.101266	0.078341	0.414651	0.0970091	1.17656	0.174681
148046		2.3074	0.0529671	359	327	174.5	675	460	533	295	203.5	109.5	604	393	469.5	202.667	488.833	1.56915	1.13056	0.558673	3.3649	1.98987	2.16359	1.08613	2.50612	0.466521	0.29878
148448		0.716952	0.506613	92	134.5	79.5	84.5	82.5	73	28	9.5	11	9.5	16.5	10.5	16.1667	12.1667	0.148936	0.0527778	0.0561224	0.0529248	0.0835443	0.0483871	0.0859455	0.0616187	0.635021	0.310347
148494		N/A	N/A	71	115	63.5	67	63	62	5.5	-8.5	0	-5	-2.5	-2	-1	-3.16667	0.0292553	N/A	N/A	N/A	N/A	N/A	0.0292553	N/A	N/A	N/A
148354		0.341598	0.193652	86.5	191.5	88.5	85.5	85.5	79	23.5	71.5	24.5	11	17	16	39.8333	14.6667	0.125	0.397222	0.125	0.0612813	0.0860759	0.0737327	0.215741	0.0736967	0.728502	0.168221
148336		0.289309	0.0123091	82.5	140.5	72	78	74.5	67.5	18	16	11	2.5	6	5.5	15	4.66667	0.0957447	0.0888889	0.0561224	0.0139276	0.0303797	0.0253456	0.080252	0.0232176	0.26387	0.363085
148446		1.0796	0.821964	161	148.5	170	171	146.5	142	96.5	28.5	102.5	96.5	78	77.5	75.8333	84	0.513298	0.158333	0.522959	0.537604	0.394937	0.357143	0.398197	0.429895	0.521812	0.22139
148632		1.48196	0.112023	916	500.5	1006.5	1171.5	1202.5	1171	852	380.5	941	1100	1132.5	1107	724.5	1113.17	4.53191	2.11389	4.80102	6.12813	5.73418	5.10138	3.81561	5.65456	0.387844	0.0916047
148220		0.232172	0.103722	80.5	152	72.5	72	74	70.5	17.5	30.5	8.5	2	5	7.5	18.8333	4.83333	0.0930851	0.169444	0.0433673	0.0111421	0.0253165	0.0345622	0.101966	0.0236736	0.622817	0.498285
148498		0.159766	N/A	75	123	64.5	73.5	65.5	61	10.5	2.5	-2	1	-0.5	-2.5	3.66667	-0.666667	0.0558511	0.0138889	N/A	0.00557103	N/A	N/A	0.03487	0.00557103	0.850925	N/A
148364		0.445598	0.171079	82	128.5	71	78.5	74	71	17.5	6	9	2.5	6.5	6.5	10.8333	5.16667	0.0930851	0.0333333	0.0459184	0.0139276	0.0329114	0.0299539	0.0574456	0.0255976	0.548338	0.399028
148427		0.256309	0.0692338	85.5	137.5	73.5	78.5	72.5	68	19	17.5	6.5	3.5	6.5	1.5	14.3333	3.83333	0.101064	0.0972222	0.0331633	0.0194986	0.0329114	0.00691244	0.0771498	0.0197741	0.494387	0.657508
148313		N/A	N/A	76.5	131.5	68.5	66.5	66	58	12.5	5.5	2.5	-6	-2	-2.5	6.83333	-3.5	0.0664894	0.0305556	0.0127551	N/A	N/A	N/A	0.0366	N/A	0.747878	N/A
17327	hsa-miR-630	0.578328	0.269561	125	256.5	117.5	125.5	112	111.5	61	127.5	51	53	42.5	51.5	79.8333	49	0.324468	0.708333	0.260204	0.295265	0.21519	0.237327	0.431002	0.249261	0.562216	0.165889
17488	kshv-miR-K12-6-3p	0.95634	0.820272	176	298.5	200	232.5	193.5	204	113.5	171.5	137	160	123	139.5	140.667	140.833	0.603723	0.952778	0.69898	0.891365	0.622785	0.642857	0.751827	0.719002	0.239986	0.208076
46207		0.288539	0.336027	144	745	190	145.5	132.5	182	79	616.5	123	71.5	67	120	272.833	86.1667	0.420213	3.425	0.627551	0.398329	0.339241	0.552995	1.49092	0.430188	1.12559	0.256589
42813		N/A	N/A	68.5	116.5	65.5	62.5	63	57.5	6.5	-15	-1.5	-12	-3.5	-6	-3.33333	-7.16667	0.0345745	N/A	N/A	N/A	N/A	N/A	0.0345745	N/A	N/A	N/A
17936	hsa-miR-16-1-3p	0.986344	0.957133	101.5	146.5	89	100.5	94.5	90	38	17.5	25	29	28.5	25	26.8333	27.5	0.202128	0.0972222	0.127551	0.16156	0.144304	0.115207	0.1423	0.140357	0.379378	0.16691
168897	hsa-miR-5187-5p	0.290858	N/A	77.5	126	64	77	72	67.5	11.5	-4.5	0	4	2.5	4	2.33333	3.5	0.0611702	N/A	N/A	0.0222841	0.0126582	0.0184332	0.0611702	0.0177918	N/A	0.27231
168882	hsa-miR-664b-3p	1.10638	0.393661	1531.5	1853	2113.5	2158.5	2001.5	2104	1466.5	1726.5	2048	2083	1935	2040	1747	2019.33	7.80053	9.59167	10.449	11.6045	9.79747	9.40092	9.28039	10.2676	0.145617	0.114398
168710	hsa-miR-4536-5p	N/A	N/A	70	119.5	60.5	67.5	64	58.5	6	-5	-6	-8.5	-3	-5.5	-1.66667	-5.66667	0.0319149	N/A	N/A	N/A	N/A	N/A	0.0319149	N/A	N/A	N/A
168590	hsa-miR-4520a-5p/hsa-miR-4520b-5p	0.175007	0.00525827	74.5	129	67	75.5	68.5	65.5	10	8.5	-0.5	1.5	0	2	6	1.16667	0.0531915	0.0472222	N/A	0.00835655	N/A	0.00921659	0.0502069	0.00878657	0.0840704	0.0692128
168728	hsa-miR-4641	0.232801	N/A	65.5	128	64	67.5	68	56	2	2	-7	-5	0.5	-6	-1	-3.5	0.0106383	0.0111111	N/A	N/A	0.00253165	N/A	0.0108747	0.00253165	0.0307438	N/A
168719	hsa-miR-4495	N/A	N/A	65.5	110.5	58	64	62.5	54	2	-15	-8	-8.5	-5	-7	-7	-6.83333	0.0106383	N/A	N/A	N/A	N/A	N/A	0.0106383	N/A	N/A	N/A
168785	hsa-miR-520d-5p	N/A	N/A	69	119.5	64.5	67.5	64	57	5	-4.5	-4	-5.5	-5.5	-6	-1.16667	-5.66667	0.0265957	N/A	N/A	N/A	N/A	N/A	0.0265957	N/A	N/A	N/A
168615	hsa-miR-4655-3p	N/A	N/A	71	132.5	70.5	70	64.5	56	8	9.5	3	-1.5	-4	-7.5	6.83333	-4.33333	0.0425532	0.0527778	0.0153061	N/A	N/A	N/A	0.036879	N/A	0.525218	N/A
168781	hsa-miR-4776-3p	1.04313	0.835578	107.5	156.5	118.5	119.5	100.5	126.5	45	33	53.5	46	34	64.5	43.8333	48.1667	0.239362	0.183333	0.272959	0.256267	0.172152	0.297235	0.231885	0.241885	0.195262	0.263637
168782	hsa-miR-5093	0.0513309	N/A	83.5	132.5	64	75.5	67.5	60.5	17.5	8.5	1.5	-3.5	0.5	-3	9.16667	-2	0.0930851	0.0472222	0.00765306	N/A	0.00253165	N/A	0.0493201	0.00253165	0.86688	N/A
168820	hsa-miR-4711-5p	N/A	N/A	60.5	113	57.5	66	58	54	-3	-11.5	-3.5	-6	-10	-7	-6	-7.66667	N/A	N/A	N/A	N/A	N/A	N/A	N/A	N/A	N/A	N/A
168750	hsa-miR-4645-5p	0.36775	0.121258	74.5	122.5	87	79	71.5	74	10.5	-2.5	20	1	7	10	9.33333	6	0.0558511	N/A	0.102041	0.00557103	0.035443	0.0460829	0.0789459	0.0290323	0.413715	0.723435
168921	hsa-miR-4718	N/A	N/A	66	108	65.5	66	63	57.5	-1	-13.5	-3	-11	-5	-6.5	-5.83333	-7.5	N/A	N/A	N/A	N/A	N/A	N/A	N/A	N/A	N/A	N/A
168759	hsa-miR-3689f	N/A	N/A	75	131.5	63.5	69.5	62	60	9	9	-2	-6	-4.5	-1.5	5.33333	-4	0.0478723	0.05	N/A	N/A	N/A	N/A	0.0489362	N/A	0.0307438	N/A
168962	hsa-miR-548ab	N/A	N/A	69.5	118.5	61	67.5	64	61	4.5	-4.5	-5.5	-8	-4.5	-1.5	-1.83333	-4.66667	0.0239362	N/A	N/A	N/A	N/A	N/A	0.0239362	N/A	N/A	N/A
168666	hsa-miR-4659a-5p	0.749881	N/A	72.5	123	64.5	69.5	64	65.5	8	-5	2.5	-5.5	-1.5	4.5	1.83333	-0.833333	0.0425532	N/A	0.0127551	N/A	N/A	0.0207373	0.0276541	0.0207373	0.761927	N/A
168955	hsa-miR-4756-3p	0.731676	0.196657	140	225	127	138	115	133	76.5	96.5	62.5	63.5	46.5	72.5	78.5	60.8333	0.406915	0.536111	0.318878	0.35376	0.235443	0.334101	0.420635	0.307768	0.259762	0.206006
168703	hsa-miR-4716-3p	0.349882	0.139274	82	135.5	70.5	80.5	66.5	59.5	15	11	6	4	3.5	-1.5	10.6667	2	0.0797872	0.0611111	0.0306122	0.0222841	0.0177215	N/A	0.0571702	0.0200028	0.434199	0.16129
168663	hsa-miR-4442	N/A	N/A	72.5	121	60.5	68	63.5	56	8	-7	-4.5	-3.5	-4.5	-7	-1.16667	-5	0.0425532	N/A	N/A	N/A	N/A	N/A	0.0425532	N/A	N/A	N/A
168779	hsa-miR-4797-3p	N/A	N/A	64	118.5	59	68.5	57.5	55.5	0.5	-10	-4.5	-7.5	-11.5	-8.5	-4.66667	-9.16667	0.00265957	N/A	N/A	N/A	N/A	N/A	0.00265957	N/A	N/A	N/A
169102	hsa-miR-4639-3p	0.458905	0.413164	879.5	4974	1189	1104.5	1108	1363	816.5	4851	1123	1029.5	1040.5	1299	2263.5	1123	4.34309	26.95	5.72959	5.73538	5.26835	5.98618	12.3409	5.6633	1.02674	0.064326
169285	hsa-miR-4467	1.13279	0.39124	2483.5	1748.5	2612.5	2659	2788	2522	2418.5	1622	2546	2584	2720	2458	2195.5	2587.33	12.8644	9.01111	12.9898	14.3955	13.7722	11.3272	11.6218	13.165	0.194614	0.12319
169249	hsa-miR-4482-5p	N/A	N/A	68.5	117.5	69.5	71.5	65.5	58.5	2	-15	4	-1.5	-1.5	-3	-3	-2	0.0106383	N/A	0.0204082	N/A	N/A	N/A	0.0155232	N/A	0.445032	N/A
168993	hsa-miR-4799-3p	0.142555	0.364903	80.5	344	82.5	80	78.5	85	13.5	217.5	14.5	6	11.5	22	81.8333	13.1667	0.0718085	1.20833	0.0739796	0.0334262	0.0582278	0.101382	0.451374	0.0643455	1.45234	0.534439
169011	hsa-miR-4801	N/A	N/A	60.5	103.5	59	63.5	58.5	54.5	-3.5	-18	-5.5	-11.5	-10	-9.5	-9	-10.3333	N/A	N/A	N/A	N/A	N/A	N/A	N/A	N/A	N/A	N/A
169049	hsa-miR-3162-3p	0.422938	0.287487	86.5	207	93.5	92	86.5	86.5	22	81.5	25.5	18	20	20.5	43	19.5	0.117021	0.452778	0.130102	0.100279	0.101266	0.09447	0.2333	0.0986715	0.815196	0.0372131
169001	hsa-miR-4670-5p	N/A	N/A	68.5	122.5	66	64.5	64	57	5.5	-2.5	-3	-8	-5	-5.5	0	-6.16667	0.0292553	N/A	N/A	N/A	N/A	N/A	0.0292553	N/A	N/A	N/A
169039	hsa-miR-4782-3p	N/A	N/A	66	112.5	59	67.5	58	54.5	4	-9.5	-8	-4.5	-9.5	-9	-4.5	-7.66667	0.0212766	N/A	N/A	N/A	N/A	N/A	0.0212766	N/A	N/A	N/A
169181	hsa-miR-5191	0.457318	0.0447956	82	130.5	79	78	74.5	68.5	18	9.5	15.5	5.5	9.5	5.5	14.3333	6.83333	0.0957447	0.0527778	0.0790816	0.0306407	0.0481013	0.0253456	0.075868	0.0346959	0.285535	0.343196
169379	hsa-miR-4694-3p	0.516878	0.477819	114	456.5	137	154.5	148	157.5	51	337.5	73	80	84	93.5	153.833	85.8333	0.271277	1.875	0.372449	0.445682	0.425316	0.430876	0.839575	0.433958	1.06974	0.0242584
169232	hsa-miR-3156-3p	1.88756	0.0396797	1685.5	1042.5	2617.5	3257.5	3712.5	3161.5	1621.5	918.5	2552.5	3184.5	3649.5	3097.5	1697.5	3310.5	8.625	5.10278	13.023	17.7409	18.4785	14.2742	8.91691	16.8312	0.445014	0.133379
169046	hsa-miR-4715-5p	N/A	N/A	75	122	71	70.5	65.5	58	10.5	-1.5	8	-6	-1.5	-5.5	5.66667	-4.33333	0.0558511	N/A	0.0408163	N/A	N/A	N/A	0.0483337	N/A	0.219953	N/A
169275	hsa-miR-548aq-3p	0.761712	N/A	69	121.5	65.5	72.5	65	61.5	5.5	0	-2.5	4	-4	-1.5	1	-0.5	0.0292553	N/A	N/A	0.0222841	N/A	N/A	0.0292553	0.0222841	N/A	N/A
169245	hsa-miR-2467-3p	N/A	N/A	66.5	112	64.5	67.5	63	59.5	5	-8.5	0	-6.5	-3	-1.5	-1.16667	-3.66667	0.0265957	N/A	N/A	N/A	N/A	N/A	0.0265957	N/A	N/A	N/A
169038	hsa-miR-488-3p	0.505981	0.0580493	82.5	133.5	79.5	75.5	77	68	19	13.5	12.5	5.5	12	6.5	15	8	0.101064	0.075	0.0637755	0.0306407	0.0607595	0.0299539	0.0799464	0.0404514	0.239285	0.434861
169240	hsa-miR-3944-5p	0.731399	N/A	74	116.5	71	70.5	64.5	68.5	7.5	-3.5	7	-2.5	-4.5	6	3.66667	-0.333333	0.0398936	N/A	0.0357143	N/A	N/A	0.0276498	0.037804	0.0276498	0.0781726	N/A
[truncated: 1,555 more rows]
