# Supplementary material for: miR-195-5p Regulates Hair Follicle Inductivity of Dermal Papilla Cells by Suppressing Wnt/β-Catenin Activation
Source: Biomed Res Int. 2018 Apr 22;2018:4924356. doi: 10.1155/2018/4924356 (PMC5937601; doi:10.1155/2018/4924356)
Supplement: Supplementary 2 — Table S2: upregulation expressed candidate target genes of miRNAs. [file 4924356.f2.xlsx]

## Sheet: miranda
mirbase19	matuacc	mirnaname	geneid	genesymbol	mirsvrscore	alignment details
hsa-miR-196a-3p	MIMAT0004562	hsa-miR-196a*	57711	ZNF529	-0.89	http://www.microrna.org/microrna/getMrna.do?gene=57711&matureName=hsa-miR-196a*&organism=9606
hsa-miR-196a-3p	MIMAT0004562	hsa-miR-196a*	2915	GRM5	-0.85	http://www.microrna.org/microrna/getMrna.do?gene=2915&matureName=hsa-miR-196a*&organism=9606
hsa-miR-196a-3p	MIMAT0004562	hsa-miR-196a*	3158	HMGCS2	-0.32	http://www.microrna.org/microrna/getMrna.do?gene=3158&matureName=hsa-miR-196a*&organism=9606
hsa-miR-196a-3p	MIMAT0004562	hsa-miR-196a*	54843	SYTL2	-0.98	http://www.microrna.org/microrna/getMrna.do?gene=54843&matureName=hsa-miR-196a*&organism=9606
hsa-miR-196a-3p	MIMAT0004562	hsa-miR-196a*	10156	RASA4	-0.16	http://www.microrna.org/microrna/getMrna.do?gene=10156&matureName=hsa-miR-196a*&organism=9606
hsa-miR-196a-3p	MIMAT0004562	hsa-miR-196a*	90167	FRMD7	-0.36	http://www.microrna.org/microrna/getMrna.do?gene=90167&matureName=hsa-miR-196a*&organism=9606
hsa-miR-196a-3p	MIMAT0004562	hsa-miR-196a*	92369	SPSB4	-0.28	http://www.microrna.org/microrna/getMrna.do?gene=92369&matureName=hsa-miR-196a*&organism=9606
hsa-miR-196a-3p	MIMAT0004562	hsa-miR-196a*	81577	GFOD2	-0.31	http://www.microrna.org/microrna/getMrna.do?gene=81577&matureName=hsa-miR-196a*&organism=9606
hsa-miR-196a-3p	MIMAT0004562	hsa-miR-196a*	57026	PDXP	-0.6	http://www.microrna.org/microrna/getMrna.do?gene=57026&matureName=hsa-miR-196a*&organism=9606
hsa-miR-196a-3p	MIMAT0004562	hsa-miR-196a*	114548	NLRP3	-0.98	http://www.microrna.org/microrna/getMrna.do?gene=114548&matureName=hsa-miR-196a*&organism=9606
hsa-miR-196a-3p	MIMAT0004562	hsa-miR-196a*	343070	PRAMEF9	-0.67	http://www.microrna.org/microrna/getMrna.do?gene=343070&matureName=hsa-miR-196a*&organism=9606
hsa-miR-196a-3p	MIMAT0004562	hsa-miR-196a*	26095	PTPN20B	-0.46	http://www.microrna.org/microrna/getMrna.do?gene=26095&matureName=hsa-miR-196a*&organism=9606
hsa-miR-196a-3p	MIMAT0004562	hsa-miR-196a*	10234	LRRC17	-0.98	http://www.microrna.org/microrna/getMrna.do?gene=10234&matureName=hsa-miR-196a*&organism=9606
hsa-miR-196a-3p	MIMAT0004562	hsa-miR-196a*	8856	NR1I2	-0.16	http://www.microrna.org/microrna/getMrna.do?gene=8856&matureName=hsa-miR-196a*&organism=9606
hsa-miR-196a-3p	MIMAT0004562	hsa-miR-196a*	643853	TMPPE	-0.12	http://www.microrna.org/microrna/getMrna.do?gene=643853&matureName=hsa-miR-196a*&organism=9606
hsa-miR-196a-3p	MIMAT0004562	hsa-miR-196a*	1982	EIF4G2	-1.16	http://www.microrna.org/microrna/getMrna.do?gene=1982&matureName=hsa-miR-196a*&organism=9606
hsa-miR-196a-3p	MIMAT0004562	hsa-miR-196a*	1982	EIF4G2	-0.1	http://www.microrna.org/microrna/getMrna.do?gene=1982&matureName=hsa-miR-196a*&organism=9606
hsa-miR-196a-3p	MIMAT0004562	hsa-miR-196a*	1982	EIF4G2	-0.51	http://www.microrna.org/microrna/getMrna.do?gene=1982&matureName=hsa-miR-196a*&organism=9606
hsa-miR-196a-3p	MIMAT0004562	hsa-miR-196a*	1982	EIF4G2	-0.19	http://www.microrna.org/microrna/getMrna.do?gene=1982&matureName=hsa-miR-196a*&organism=9606
hsa-miR-196a-3p	MIMAT0004562	hsa-miR-196a*	11011	TLK2	-0.82	http://www.microrna.org/microrna/getMrna.do?gene=11011&matureName=hsa-miR-196a*&organism=9606
hsa-miR-196a-3p	MIMAT0004562	hsa-miR-196a*	55500	ETNK1	-0.1	http://www.microrna.org/microrna/getMrna.do?gene=55500&matureName=hsa-miR-196a*&organism=9606
hsa-miR-196a-3p	MIMAT0004562	hsa-miR-196a*	5108	PCM1	-0.5	http://www.microrna.org/microrna/getMrna.do?gene=5108&matureName=hsa-miR-196a*&organism=9606
hsa-miR-196a-3p	MIMAT0004562	hsa-miR-196a*	3824	KLRD1	-0.18	http://www.microrna.org/microrna/getMrna.do?gene=3824&matureName=hsa-miR-196a*&organism=9606
hsa-miR-196a-3p	MIMAT0004562	hsa-miR-196a*	10107	TRIM10	-0.12	http://www.microrna.org/microrna/getMrna.do?gene=10107&matureName=hsa-miR-196a*&organism=9606
hsa-miR-196a-3p	MIMAT0004562	hsa-miR-196a*	5375	PMP2	-0.48	http://www.microrna.org/microrna/getMrna.do?gene=5375&matureName=hsa-miR-196a*&organism=9606
hsa-miR-196a-3p	MIMAT0004562	hsa-miR-196a*	5375	PMP2	-0.78	http://www.microrna.org/microrna/getMrna.do?gene=5375&matureName=hsa-miR-196a*&organism=9606
hsa-miR-196a-3p	MIMAT0004562	hsa-miR-196a*	6517	SLC2A4	-0.17	http://www.microrna.org/microrna/getMrna.do?gene=6517&matureName=hsa-miR-196a*&organism=9606
hsa-miR-196a-3p	MIMAT0004562	hsa-miR-196a*	340156	MYLK4	-0.13	http://www.microrna.org/microrna/getMrna.do?gene=340156&matureName=hsa-miR-196a*&organism=9606
hsa-miR-196a-3p	MIMAT0004562	hsa-miR-196a*	783	CACNB2	-1	http://www.microrna.org/microrna/getMrna.do?gene=783&matureName=hsa-miR-196a*&organism=9606
hsa-miR-196a-3p	MIMAT0004562	hsa-miR-196a*	26002	MOXD1	-0.19	http://www.microrna.org/microrna/getMrna.do?gene=26002&matureName=hsa-miR-196a*&organism=9606
hsa-miR-196a-3p	MIMAT0004562	hsa-miR-196a*	51626	DYNC2LI1	-0.29	http://www.microrna.org/microrna/getMrna.do?gene=51626&matureName=hsa-miR-196a*&organism=9606
hsa-miR-196a-3p	MIMAT0004562	hsa-miR-196a*	51626	DYNC2LI1	-0.14	http://www.microrna.org/microrna/getMrna.do?gene=51626&matureName=hsa-miR-196a*&organism=9606
hsa-miR-196a-3p	MIMAT0004562	hsa-miR-196a*	6934	TCF7L2	-0.1	http://www.microrna.org/microrna/getMrna.do?gene=6934&matureName=hsa-miR-196a*&organism=9606
hsa-miR-196a-3p	MIMAT0004562	hsa-miR-196a*	4199	ME1	-0.9	http://www.microrna.org/microrna/getMrna.do?gene=4199&matureName=hsa-miR-196a*&organism=9606
hsa-miR-196a-3p	MIMAT0004562	hsa-miR-196a*	6016	RIT1	-0.2	http://www.microrna.org/microrna/getMrna.do?gene=6016&matureName=hsa-miR-196a*&organism=9606
hsa-miR-196a-3p	MIMAT0004562	hsa-miR-196a*	7020	TFAP2A	-1.17	http://www.microrna.org/microrna/getMrna.do?gene=7020&matureName=hsa-miR-196a*&organism=9606
hsa-miR-196a-3p	MIMAT0004562	hsa-miR-196a*	4363	ABCC1	-0.35	http://www.microrna.org/microrna/getMrna.do?gene=4363&matureName=hsa-miR-196a*&organism=9606
hsa-miR-196a-3p	MIMAT0004562	hsa-miR-196a*	3609	ILF3	-0.81	http://www.microrna.org/microrna/getMrna.do?gene=3609&matureName=hsa-miR-196a*&organism=9606
hsa-miR-196a-3p	MIMAT0004562	hsa-miR-196a*	222663	SCUBE3	-0.71	http://www.microrna.org/microrna/getMrna.do?gene=222663&matureName=hsa-miR-196a*&organism=9606
hsa-miR-196a-3p	MIMAT0004562	hsa-miR-196a*	9439	MED23	-0.27	http://www.microrna.org/microrna/getMrna.do?gene=9439&matureName=hsa-miR-196a*&organism=9606
hsa-miR-196a-3p	MIMAT0004562	hsa-miR-196a*	9337	CNOT8	-0.3	http://www.microrna.org/microrna/getMrna.do?gene=9337&matureName=hsa-miR-196a*&organism=9606
hsa-miR-196a-3p	MIMAT0004562	hsa-miR-196a*	4916	NTRK3	-0.29	http://www.microrna.org/microrna/getMrna.do?gene=4916&matureName=hsa-miR-196a*&organism=9606
hsa-miR-196a-3p	MIMAT0004562	hsa-miR-196a*	22854	NTNG1	-0.19	http://www.microrna.org/microrna/getMrna.do?gene=22854&matureName=hsa-miR-196a*&organism=9606
hsa-miR-196a-3p	MIMAT0004562	hsa-miR-196a*	85458	DIXDC1	-0.17	http://www.microrna.org/microrna/getMrna.do?gene=85458&matureName=hsa-miR-196a*&organism=9606
hsa-miR-196a-3p	MIMAT0004562	hsa-miR-196a*	85458	DIXDC1	-0.62	http://www.microrna.org/microrna/getMrna.do?gene=85458&matureName=hsa-miR-196a*&organism=9606
hsa-miR-196a-3p	MIMAT0004562	hsa-miR-196a*	57620	STIM2	-1.04	http://www.microrna.org/microrna/getMrna.do?gene=57620&matureName=hsa-miR-196a*&organism=9606
hsa-miR-196a-3p	MIMAT0004562	hsa-miR-196a*	11261	CHP	-0.23	http://www.microrna.org/microrna/getMrna.do?gene=11261&matureName=hsa-miR-196a*&organism=9606
hsa-miR-196a-3p	MIMAT0004562	hsa-miR-196a*	121340	SP7	-0.35	http://www.microrna.org/microrna/getMrna.do?gene=121340&matureName=hsa-miR-196a*&organism=9606
hsa-miR-196a-3p	MIMAT0004562	hsa-miR-196a*	7170	TPM3	-0.23	http://www.microrna.org/microrna/getMrna.do?gene=7170&matureName=hsa-miR-196a*&organism=9606
hsa-miR-196a-3p	MIMAT0004562	hsa-miR-196a*	56034	PDGFC	-0.11	http://www.microrna.org/microrna/getMrna.do?gene=56034&matureName=hsa-miR-196a*&organism=9606
hsa-miR-196a-3p	MIMAT0004562	hsa-miR-196a*	145264	SERPINA12	-0.23	http://www.microrna.org/microrna/getMrna.do?gene=145264&matureName=hsa-miR-196a*&organism=9606
hsa-miR-196a-3p	MIMAT0004562	hsa-miR-196a*	793	CALB1	-0.19	http://www.microrna.org/microrna/getMrna.do?gene=793&matureName=hsa-miR-196a*&organism=9606
hsa-miR-196a-3p	MIMAT0004562	hsa-miR-196a*	115201	ATG4A	-0.1	http://www.microrna.org/microrna/getMrna.do?gene=115201&matureName=hsa-miR-196a*&organism=9606
hsa-miR-196a-3p	MIMAT0004562	hsa-miR-196a*	287	ANK2	-1.04	http://www.microrna.org/microrna/getMrna.do?gene=287&matureName=hsa-miR-196a*&organism=9606
hsa-miR-196a-3p	MIMAT0004562	hsa-miR-196a*	91433	RCCD1	-0.11	http://www.microrna.org/microrna/getMrna.do?gene=91433&matureName=hsa-miR-196a*&organism=9606
hsa-miR-196a-3p	MIMAT0004562	hsa-miR-196a*	92399	MRRF	-0.5	http://www.microrna.org/microrna/getMrna.do?gene=92399&matureName=hsa-miR-196a*&organism=9606
hsa-miR-196a-3p	MIMAT0004562	hsa-miR-196a*	2538	G6PC	-0.1	http://www.microrna.org/microrna/getMrna.do?gene=2538&matureName=hsa-miR-196a*&organism=9606
hsa-miR-196a-3p	MIMAT0004562	hsa-miR-196a*	26608	TBL2	-0.34	http://www.microrna.org/microrna/getMrna.do?gene=26608&matureName=hsa-miR-196a*&organism=9606
hsa-miR-196a-3p	MIMAT0004562	hsa-miR-196a*	84881	RPUSD4	-0.3	http://www.microrna.org/microrna/getMrna.do?gene=84881&matureName=hsa-miR-196a*&organism=9606
hsa-miR-196a-3p	MIMAT0004562	hsa-miR-196a*	116362	RBP7	-0.26	http://www.microrna.org/microrna/getMrna.do?gene=116362&matureName=hsa-miR-196a*&organism=9606
hsa-miR-196a-3p	MIMAT0004562	hsa-miR-196a*	54847	SIDT1	-0.86	http://www.microrna.org/microrna/getMrna.do?gene=54847&matureName=hsa-miR-196a*&organism=9606
hsa-miR-196a-3p	MIMAT0004562	hsa-miR-196a*	5232	PGK2	-0.26	http://www.microrna.org/microrna/getMrna.do?gene=5232&matureName=hsa-miR-196a*&organism=9606
hsa-miR-196a-3p	MIMAT0004562	hsa-miR-196a*	9910	RABGAP1L	-1.12	http://www.microrna.org/microrna/getMrna.do?gene=9910&matureName=hsa-miR-196a*&organism=9606
hsa-miR-196a-3p	MIMAT0004562	hsa-miR-196a*	79969	C6orf134	-0.49	http://www.microrna.org/microrna/getMrna.do?gene=79969&matureName=hsa-miR-196a*&organism=9606
hsa-miR-196a-3p	MIMAT0004562	hsa-miR-196a*	79969	C6orf134	-0.15	http://www.microrna.org/microrna/getMrna.do?gene=79969&matureName=hsa-miR-196a*&organism=9606
hsa-miR-196a-3p	MIMAT0004562	hsa-miR-196a*	5534	PPP3R1	-1.3	http://www.microrna.org/microrna/getMrna.do?gene=5534&matureName=hsa-miR-196a*&organism=9606
hsa-miR-196a-3p	MIMAT0004562	hsa-miR-196a*	60558	GUF1	-0.72	http://www.microrna.org/microrna/getMrna.do?gene=60558&matureName=hsa-miR-196a*&organism=9606
hsa-miR-196a-3p	MIMAT0004562	hsa-miR-196a*	842	CASP9	-0.55	http://www.microrna.org/microrna/getMrna.do?gene=842&matureName=hsa-miR-196a*&organism=9606
hsa-miR-196a-3p	MIMAT0004562	hsa-miR-196a*	405	ARNT	-0.14	http://www.microrna.org/microrna/getMrna.do?gene=405&matureName=hsa-miR-196a*&organism=9606
hsa-miR-196a-3p	MIMAT0004562	hsa-miR-196a*	10827	FAM114A2	-0.78	http://www.microrna.org/microrna/getMrna.do?gene=10827&matureName=hsa-miR-196a*&organism=9606
hsa-miR-196a-3p	MIMAT0004562	hsa-miR-196a*	10827	FAM114A2	-0.11	http://www.microrna.org/microrna/getMrna.do?gene=10827&matureName=hsa-miR-196a*&organism=9606
hsa-miR-196a-3p	MIMAT0004562	hsa-miR-196a*	386759	MGC9913	-0.81	http://www.microrna.org/microrna/getMrna.do?gene=386759&matureName=hsa-miR-196a*&organism=9606
hsa-miR-196a-3p	MIMAT0004562	hsa-miR-196a*	7442	TRPV1	-0.23	http://www.microrna.org/microrna/getMrna.do?gene=7442&matureName=hsa-miR-196a*&organism=9606
hsa-miR-196a-3p	MIMAT0004562	hsa-miR-196a*	55010	C12orf48	-0.16	http://www.microrna.org/microrna/getMrna.do?gene=55010&matureName=hsa-miR-196a*&organism=9606
hsa-miR-196a-3p	MIMAT0004562	hsa-miR-196a*	64067	NPAS3	-1.09	http://www.microrna.org/microrna/getMrna.do?gene=64067&matureName=hsa-miR-196a*&organism=9606
hsa-miR-196a-3p	MIMAT0004562	hsa-miR-196a*	4998	ORC1L	-0.7	http://www.microrna.org/microrna/getMrna.do?gene=4998&matureName=hsa-miR-196a*&organism=9606
hsa-miR-196a-3p	MIMAT0004562	hsa-miR-196a*	51316	PLAC8	-0.24	http://www.microrna.org/microrna/getMrna.do?gene=51316&matureName=hsa-miR-196a*&organism=9606
hsa-miR-196a-3p	MIMAT0004562	hsa-miR-196a*	51316	PLAC8	-0.1	http://www.microrna.org/microrna/getMrna.do?gene=51316&matureName=hsa-miR-196a*&organism=9606
hsa-miR-196a-3p	MIMAT0004562	hsa-miR-196a*	138151	NACC2	-1	http://www.microrna.org/microrna/getMrna.do?gene=138151&matureName=hsa-miR-196a*&organism=9606
hsa-miR-196a-3p	MIMAT0004562	hsa-miR-196a*	260341	TFAMP1	-0.3	http://www.microrna.org/microrna/getMrna.do?gene=260341&matureName=hsa-miR-196a*&organism=9606
hsa-miR-196a-3p	MIMAT0004562	hsa-miR-196a*	22872	SEC31A	-1.29	http://www.microrna.org/microrna/getMrna.do?gene=22872&matureName=hsa-miR-196a*&organism=9606
hsa-miR-196a-3p	MIMAT0004562	hsa-miR-196a*	84614	ZBTB37	-1.13	http://www.microrna.org/microrna/getMrna.do?gene=84614&matureName=hsa-miR-196a*&organism=9606
hsa-miR-196a-3p	MIMAT0004562	hsa-miR-196a*	54676	GTPBP2	-0.31	http://www.microrna.org/microrna/getMrna.do?gene=54676&matureName=hsa-miR-196a*&organism=9606
hsa-miR-196a-3p	MIMAT0004562	hsa-miR-196a*	54676	GTPBP2	-0.97	http://www.microrna.org/microrna/getMrna.do?gene=54676&matureName=hsa-miR-196a*&organism=9606
hsa-miR-196a-3p	MIMAT0004562	hsa-miR-196a*	401136	TMPRSS11BNL	-0.11	http://www.microrna.org/microrna/getMrna.do?gene=401136&matureName=hsa-miR-196a*&organism=9606
hsa-miR-196a-3p	MIMAT0004562	hsa-miR-196a*	56261	GPCPD1	-0.77	http://www.microrna.org/microrna/getMrna.do?gene=56261&matureName=hsa-miR-196a*&organism=9606
hsa-miR-196a-3p	MIMAT0004562	hsa-miR-196a*	9758	FRMPD4	-0.63	http://www.microrna.org/microrna/getMrna.do?gene=9758&matureName=hsa-miR-196a*&organism=9606
hsa-miR-196a-3p	MIMAT0004562	hsa-miR-196a*	91120	ZNF682	-0.14	http://www.microrna.org/microrna/getMrna.do?gene=91120&matureName=hsa-miR-196a*&organism=9606
hsa-miR-196a-3p	MIMAT0004562	hsa-miR-196a*	4026	LPP	-0.17	http://www.microrna.org/microrna/getMrna.do?gene=4026&matureName=hsa-miR-196a*&organism=9606
hsa-miR-196a-3p	MIMAT0004562	hsa-miR-196a*	4878	NPPA	-0.82	http://www.microrna.org/microrna/getMrna.do?gene=4878&matureName=hsa-miR-196a*&organism=9606
hsa-miR-196a-3p	MIMAT0004562	hsa-miR-196a*	151556	GPR155	-0.68	http://www.microrna.org/microrna/getMrna.do?gene=151556&matureName=hsa-miR-196a*&organism=9606
hsa-miR-196a-3p	MIMAT0004562	hsa-miR-196a*	51816	CECR1	-0.14	http://www.microrna.org/microrna/getMrna.do?gene=51816&matureName=hsa-miR-196a*&organism=9606
hsa-miR-196a-3p	MIMAT0004562	hsa-miR-196a*	51816	CECR1	-0.18	http://www.microrna.org/microrna/getMrna.do?gene=51816&matureName=hsa-miR-196a*&organism=9606
hsa-miR-196a-3p	MIMAT0004562	hsa-miR-196a*	6760	SS18	-0.28	http://www.microrna.org/microrna/getMrna.do?gene=6760&matureName=hsa-miR-196a*&organism=9606
hsa-miR-196a-3p	MIMAT0004562	hsa-miR-196a*	2043	EPHA4	-0.28	http://www.microrna.org/microrna/getMrna.do?gene=2043&matureName=hsa-miR-196a*&organism=9606
hsa-miR-196a-3p	MIMAT0004562	hsa-miR-196a*	139716	GAB3	-0.11	http://www.microrna.org/microrna/getMrna.do?gene=139716&matureName=hsa-miR-196a*&organism=9606
hsa-miR-196a-3p	MIMAT0004562	hsa-miR-196a*	7296	TXNRD1	-0.93	http://www.microrna.org/microrna/getMrna.do?gene=7296&matureName=hsa-miR-196a*&organism=9606
hsa-miR-196a-3p	MIMAT0004562	hsa-miR-196a*	154007	SNRNP48	-0.66	http://www.microrna.org/microrna/getMrna.do?gene=154007&matureName=hsa-miR-196a*&organism=9606
hsa-miR-196a-3p	MIMAT0004562	hsa-miR-196a*	7988	ZNF212	-0.3	http://www.microrna.org/microrna/getMrna.do?gene=7988&matureName=hsa-miR-196a*&organism=9606
hsa-miR-196a-3p	MIMAT0004562	hsa-miR-196a*	11276	SYNRG	-0.18	http://www.microrna.org/microrna/getMrna.do?gene=11276&matureName=hsa-miR-196a*&organism=9606
hsa-miR-196a-3p	MIMAT0004562	hsa-miR-196a*	5937	RBMS1	-0.16	http://www.microrna.org/microrna/getMrna.do?gene=5937&matureName=hsa-miR-196a*&organism=9606
hsa-miR-196a-3p	MIMAT0004562	hsa-miR-196a*	150379	PNPLA5	-0.15	http://www.microrna.org/microrna/getMrna.do?gene=150379&matureName=hsa-miR-196a*&organism=9606
hsa-miR-196a-3p	MIMAT0004562	hsa-miR-196a*	8886	DDX18	-0.29	http://www.microrna.org/microrna/getMrna.do?gene=8886&matureName=hsa-miR-196a*&organism=9606
hsa-miR-196a-3p	MIMAT0004562	hsa-miR-196a*	29850	TRPM5	-0.23	http://www.microrna.org/microrna/getMrna.do?gene=29850&matureName=hsa-miR-196a*&organism=9606
hsa-miR-196a-3p	MIMAT0004562	hsa-miR-196a*	7494	XBP1	-0.77	http://www.microrna.org/microrna/getMrna.do?gene=7494&matureName=hsa-miR-196a*&organism=9606
hsa-miR-196a-3p	MIMAT0004562	hsa-miR-196a*	5257	PHKB	-0.93	http://www.microrna.org/microrna/getMrna.do?gene=5257&matureName=hsa-miR-196a*&organism=9606
hsa-miR-196a-3p	MIMAT0004562	hsa-miR-196a*	1455	CSNK1G2	-0.1	http://www.microrna.org/microrna/getMrna.do?gene=1455&matureName=hsa-miR-196a*&organism=9606
hsa-miR-196a-3p	MIMAT0004562	hsa-miR-196a*	7019	TFAM	-0.14	http://www.microrna.org/microrna/getMrna.do?gene=7019&matureName=hsa-miR-196a*&organism=9606
hsa-miR-196a-3p	MIMAT0004562	hsa-miR-196a*	594842	HAS2AS	-0.33	http://www.microrna.org/microrna/getMrna.do?gene=594842&matureName=hsa-miR-196a*&organism=9606
hsa-miR-196a-3p	MIMAT0004562	hsa-miR-196a*	7298	TYMS	-1.07	http://www.microrna.org/microrna/getMrna.do?gene=7298&matureName=hsa-miR-196a*&organism=9606
hsa-miR-196a-3p	MIMAT0004562	hsa-miR-196a*	7298	TYMS	-0.33	http://www.microrna.org/microrna/getMrna.do?gene=7298&matureName=hsa-miR-196a*&organism=9606
hsa-miR-196a-3p	MIMAT0004562	hsa-miR-196a*	9187	SLC24A1	-0.11	http://www.microrna.org/microrna/getMrna.do?gene=9187&matureName=hsa-miR-196a*&organism=9606
hsa-miR-196a-3p	MIMAT0004562	hsa-miR-196a*	9187	SLC24A1	-0.63	http://www.microrna.org/microrna/getMrna.do?gene=9187&matureName=hsa-miR-196a*&organism=9606
hsa-miR-196a-3p	MIMAT0004562	hsa-miR-196a*	84614	ZBTB37	-1.05	http://www.microrna.org/microrna/getMrna.do?gene=84614&matureName=hsa-miR-196a*&organism=9606
hsa-miR-196a-3p	MIMAT0004562	hsa-miR-196a*	135138	PACRG	-0.59	http://www.microrna.org/microrna/getMrna.do?gene=135138&matureName=hsa-miR-196a*&organism=9606
hsa-miR-196a-3p	MIMAT0004562	hsa-miR-196a*	55055	ZWILCH	-0.91	http://www.microrna.org/microrna/getMrna.do?gene=55055&matureName=hsa-miR-196a*&organism=9606
hsa-miR-196a-3p	MIMAT0004562	hsa-miR-196a*	762	CA4	-0.25	http://www.microrna.org/microrna/getMrna.do?gene=762&matureName=hsa-miR-196a*&organism=9606
hsa-miR-196a-3p	MIMAT0004562	hsa-miR-196a*	54039	PCBP3	-0.11	http://www.microrna.org/microrna/getMrna.do?gene=54039&matureName=hsa-miR-196a*&organism=9606
hsa-miR-196a-3p	MIMAT0004562	hsa-miR-196a*	79969	C6orf134	-0.49	http://www.microrna.org/microrna/getMrna.do?gene=79969&matureName=hsa-miR-196a*&organism=9606
hsa-miR-196a-3p	MIMAT0004562	hsa-miR-196a*	79969	C6orf134	-0.15	http://www.microrna.org/microrna/getMrna.do?gene=79969&matureName=hsa-miR-196a*&organism=9606
hsa-miR-196a-3p	MIMAT0004562	hsa-miR-196a*	340554	ZC3H12B	-0.28	http://www.microrna.org/microrna/getMrna.do?gene=340554&matureName=hsa-miR-196a*&organism=9606
hsa-miR-196a-3p	MIMAT0004562	hsa-miR-196a*	2173	FABP7	-0.22	http://www.microrna.org/microrna/getMrna.do?gene=2173&matureName=hsa-miR-196a*&organism=9606
hsa-miR-196a-3p	MIMAT0004562	hsa-miR-196a*	2173	FABP7	-0.14	http://www.microrna.org/microrna/getMrna.do?gene=2173&matureName=hsa-miR-196a*&organism=9606
hsa-miR-196a-3p	MIMAT0004562	hsa-miR-196a*	51523	CXXC5	-0.24	http://www.microrna.org/microrna/getMrna.do?gene=51523&matureName=hsa-miR-196a*&organism=9606
hsa-miR-196a-3p	MIMAT0004562	hsa-miR-196a*	59343	SENP2	-0.15	http://www.microrna.org/microrna/getMrna.do?gene=59343&matureName=hsa-miR-196a*&organism=9606
hsa-miR-196a-3p	MIMAT0004562	hsa-miR-196a*	26095	PTPN20B	-0.67	http://www.microrna.org/microrna/getMrna.do?gene=26095&matureName=hsa-miR-196a*&organism=9606
hsa-miR-196a-3p	MIMAT0004562	hsa-miR-196a*	7155	TOP2B	-0.11	http://www.microrna.org/microrna/getMrna.do?gene=7155&matureName=hsa-miR-196a*&organism=9606
hsa-miR-196a-3p	MIMAT0004562	hsa-miR-196a*	55112	WDR60	-0.33	http://www.microrna.org/microrna/getMrna.do?gene=55112&matureName=hsa-miR-196a*&organism=9606
hsa-miR-196a-3p	MIMAT0004562	hsa-miR-196a*	6302	TSPAN31	-0.11	http://www.microrna.org/microrna/getMrna.do?gene=6302&matureName=hsa-miR-196a*&organism=9606
hsa-miR-196a-3p	MIMAT0004562	hsa-miR-196a*	26064	RAI14	-0.34	http://www.microrna.org/microrna/getMrna.do?gene=26064&matureName=hsa-miR-196a*&organism=9606
hsa-miR-196a-3p	MIMAT0004562	hsa-miR-196a*	85364	ZCCHC3	-0.1	http://www.microrna.org/microrna/getMrna.do?gene=85364&matureName=hsa-miR-196a*&organism=9606
hsa-miR-196a-3p	MIMAT0004562	hsa-miR-196a*	55799	CACNA2D3	-0.16	http://www.microrna.org/microrna/getMrna.do?gene=55799&matureName=hsa-miR-196a*&organism=9606
hsa-miR-196a-3p	MIMAT0004562	hsa-miR-196a*	22897	CEP164	-0.14	http://www.microrna.org/microrna/getMrna.do?gene=22897&matureName=hsa-miR-196a*&organism=9606
hsa-miR-196a-3p	MIMAT0004562	hsa-miR-196a*	8470	SORBS2	-0.91	http://www.microrna.org/microrna/getMrna.do?gene=8470&matureName=hsa-miR-196a*&organism=9606
hsa-miR-196a-3p	MIMAT0004562	hsa-miR-196a*	4311	MME	-0.53	http://www.microrna.org/microrna/getMrna.do?gene=4311&matureName=hsa-miR-196a*&organism=9606
hsa-miR-196a-3p	MIMAT0004562	hsa-miR-196a*	5690	PSMB2	-0.1	http://www.microrna.org/microrna/getMrna.do?gene=5690&matureName=hsa-miR-196a*&organism=9606
hsa-miR-196a-3p	MIMAT0004562	hsa-miR-196a*	140733	MACROD2	-0.71	http://www.microrna.org/microrna/getMrna.do?gene=140733&matureName=hsa-miR-196a*&organism=9606
hsa-miR-196a-3p	MIMAT0004562	hsa-miR-196a*	627	BDNF	-0.68	http://www.microrna.org/microrna/getMrna.do?gene=627&matureName=hsa-miR-196a*&organism=9606
hsa-miR-196a-3p	MIMAT0004562	hsa-miR-196a*	10097	ACTR2	-0.65	http://www.microrna.org/microrna/getMrna.do?gene=10097&matureName=hsa-miR-196a*&organism=9606
hsa-miR-196a-3p	MIMAT0004562	hsa-miR-196a*	121512	FGD4	-0.52	http://www.microrna.org/microrna/getMrna.do?gene=121512&matureName=hsa-miR-196a*&organism=9606
hsa-miR-196a-3p	MIMAT0004562	hsa-miR-196a*	11322	TMC6	-0.1	http://www.microrna.org/microrna/getMrna.do?gene=11322&matureName=hsa-miR-196a*&organism=9606
hsa-miR-196a-3p	MIMAT0004562	hsa-miR-196a*	284613	CYB561D1	-0.13	http://www.microrna.org/microrna/getMrna.do?gene=284613&matureName=hsa-miR-196a*&organism=9606
hsa-miR-196a-3p	MIMAT0004562	hsa-miR-196a*	3836	KPNA1	-0.77	http://www.microrna.org/microrna/getMrna.do?gene=3836&matureName=hsa-miR-196a*&organism=9606
hsa-miR-196a-3p	MIMAT0004562	hsa-miR-196a*	29781	NCAPH2	-0.3	http://www.microrna.org/microrna/getMrna.do?gene=29781&matureName=hsa-miR-196a*&organism=9606
hsa-miR-196a-3p	MIMAT0004562	hsa-miR-196a*	284551	LOC284551	-0.13	http://www.microrna.org/microrna/getMrna.do?gene=284551&matureName=hsa-miR-196a*&organism=9606
hsa-miR-196a-3p	MIMAT0004562	hsa-miR-196a*	2664	GDI1	-0.11	http://www.microrna.org/microrna/getMrna.do?gene=2664&matureName=hsa-miR-196a*&organism=9606
hsa-miR-196a-3p	MIMAT0004562	hsa-miR-196a*	7296	TXNRD1	-0.9	http://www.microrna.org/microrna/getMrna.do?gene=7296&matureName=hsa-miR-196a*&organism=9606
hsa-miR-196a-3p	MIMAT0004562	hsa-miR-196a*	100132406	NBPF10	-1.12	http://www.microrna.org/microrna/getMrna.do?gene=100132406&matureName=hsa-miR-196a*&organism=9606
hsa-miR-196a-3p	MIMAT0004562	hsa-miR-196a*	801	CALM1	-0.31	http://www.microrna.org/microrna/getMrna.do?gene=801&matureName=hsa-miR-196a*&organism=9606
hsa-miR-196a-3p	MIMAT0004562	hsa-miR-196a*	253959	RALGAPA1	-1	http://www.microrna.org/microrna/getMrna.do?gene=253959&matureName=hsa-miR-196a*&organism=9606
hsa-miR-196a-3p	MIMAT0004562	hsa-miR-196a*	5987	TRIM27	-0.28	http://www.microrna.org/microrna/getMrna.do?gene=5987&matureName=hsa-miR-196a*&organism=9606
hsa-miR-196a-3p	MIMAT0004562	hsa-miR-196a*	4233	MET	-0.16	http://www.microrna.org/microrna/getMrna.do?gene=4233&matureName=hsa-miR-196a*&organism=9606
hsa-miR-196a-3p	MIMAT0004562	hsa-miR-196a*	4233	MET	-0.31	http://www.microrna.org/microrna/getMrna.do?gene=4233&matureName=hsa-miR-196a*&organism=9606
hsa-miR-196a-3p	MIMAT0004562	hsa-miR-196a*	3187	HNRNPH1	-1.1	http://www.microrna.org/microrna/getMrna.do?gene=3187&matureName=hsa-miR-196a*&organism=9606
hsa-miR-196a-3p	MIMAT0004562	hsa-miR-196a*	6304	SATB1	-0.16	http://www.microrna.org/microrna/getMrna.do?gene=6304&matureName=hsa-miR-196a*&organism=9606
hsa-miR-196a-3p	MIMAT0004562	hsa-miR-196a*	7048	TGFBR2	-0.13	http://www.microrna.org/microrna/getMrna.do?gene=7048&matureName=hsa-miR-196a*&organism=9606
hsa-miR-196a-3p	MIMAT0004562	hsa-miR-196a*	4212	MEIS2	-1.19	http://www.microrna.org/microrna/getMrna.do?gene=4212&matureName=hsa-miR-196a*&organism=9606
hsa-miR-196a-3p	MIMAT0004562	hsa-miR-196a*	79968	WDR76	-0.22	http://www.microrna.org/microrna/getMrna.do?gene=79968&matureName=hsa-miR-196a*&organism=9606
hsa-miR-196a-3p	MIMAT0004562	hsa-miR-196a*	84622	ZNF594	-0.14	http://www.microrna.org/microrna/getMrna.do?gene=84622&matureName=hsa-miR-196a*&organism=9606
hsa-miR-196a-3p	MIMAT0004562	hsa-miR-196a*	23760	PITPNB	-0.47	http://www.microrna.org/microrna/getMrna.do?gene=23760&matureName=hsa-miR-196a*&organism=9606
hsa-miR-196a-3p	MIMAT0004562	hsa-miR-196a*	57107	PDSS2	-0.25	http://www.microrna.org/microrna/getMrna.do?gene=57107&matureName=hsa-miR-196a*&organism=9606
hsa-miR-196a-3p	MIMAT0004562	hsa-miR-196a*	8863	PER3	-0.14	http://www.microrna.org/microrna/getMrna.do?gene=8863&matureName=hsa-miR-196a*&organism=9606
hsa-miR-196a-3p	MIMAT0004562	hsa-miR-196a*	8863	PER3	-0.12	http://www.microrna.org/microrna/getMrna.do?gene=8863&matureName=hsa-miR-196a*&organism=9606
hsa-miR-196a-3p	MIMAT0004562	hsa-miR-196a*	152006	RNF38	-0.23	http://www.microrna.org/microrna/getMrna.do?gene=152006&matureName=hsa-miR-196a*&organism=9606
hsa-miR-196a-3p	MIMAT0004562	hsa-miR-196a*	64324	NSD1	-0.11	http://www.microrna.org/microrna/getMrna.do?gene=64324&matureName=hsa-miR-196a*&organism=9606
hsa-miR-196a-3p	MIMAT0004562	hsa-miR-196a*	84108	PCGF6	-0.99	http://www.microrna.org/microrna/getMrna.do?gene=84108&matureName=hsa-miR-196a*&organism=9606
hsa-miR-196a-3p	MIMAT0004562	hsa-miR-196a*	7871	SLMAP	-0.86	http://www.microrna.org/microrna/getMrna.do?gene=7871&matureName=hsa-miR-196a*&organism=9606
hsa-miR-196a-3p	MIMAT0004562	hsa-miR-196a*	9522	SCAMP1	-0.37	http://www.microrna.org/microrna/getMrna.do?gene=9522&matureName=hsa-miR-196a*&organism=9606
hsa-miR-196a-3p	MIMAT0004562	hsa-miR-196a*	10927	SPIN1	-0.24	http://www.microrna.org/microrna/getMrna.do?gene=10927&matureName=hsa-miR-196a*&organism=9606
hsa-miR-196a-3p	MIMAT0004562	hsa-miR-196a*	55914	ERBB2IP	-0.4	http://www.microrna.org/microrna/getMrna.do?gene=55914&matureName=hsa-miR-196a*&organism=9606
hsa-miR-196a-3p	MIMAT0004562	hsa-miR-196a*	8911	CACNA1I	-0.1	http://www.microrna.org/microrna/getMrna.do?gene=8911&matureName=hsa-miR-196a*&organism=9606
hsa-miR-196a-3p	MIMAT0004562	hsa-miR-196a*	55212	BBS7	-0.21	http://www.microrna.org/microrna/getMrna.do?gene=55212&matureName=hsa-miR-196a*&organism=9606
hsa-miR-196a-3p	MIMAT0004562	hsa-miR-196a*	6387	CXCL12	-0.27	http://www.microrna.org/microrna/getMrna.do?gene=6387&matureName=hsa-miR-196a*&organism=9606
hsa-miR-196a-3p	MIMAT0004562	hsa-miR-196a*	6387	CXCL12	-1.23	http://www.microrna.org/microrna/getMrna.do?gene=6387&matureName=hsa-miR-196a*&organism=9606
hsa-miR-196a-3p	MIMAT0004562	hsa-miR-196a*	54890	ALKBH5	-0.68	http://www.microrna.org/microrna/getMrna.do?gene=54890&matureName=hsa-miR-196a*&organism=9606
hsa-miR-196a-3p	MIMAT0004562	hsa-miR-196a*	374354	NHLRC2	-0.13	http://www.microrna.org/microrna/getMrna.do?gene=374354&matureName=hsa-miR-196a*&organism=9606
hsa-miR-196a-3p	MIMAT0004562	hsa-miR-196a*	22986	SORCS3	-1.24	http://www.microrna.org/microrna/getMrna.do?gene=22986&matureName=hsa-miR-196a*&organism=9606
hsa-miR-196a-3p	MIMAT0004562	hsa-miR-196a*	7247	TSN	-0.8	http://www.microrna.org/microrna/getMrna.do?gene=7247&matureName=hsa-miR-196a*&organism=9606
hsa-miR-196a-3p	MIMAT0004562	hsa-miR-196a*	56163	RNF17	-0.54	http://www.microrna.org/microrna/getMrna.do?gene=56163&matureName=hsa-miR-196a*&organism=9606
hsa-miR-196a-3p	MIMAT0004562	hsa-miR-196a*	284110	GSDMA	-0.17	http://www.microrna.org/microrna/getMrna.do?gene=284110&matureName=hsa-miR-196a*&organism=9606
hsa-miR-196a-3p	MIMAT0004562	hsa-miR-196a*	2538	G6PC	-0.13	http://www.microrna.org/microrna/getMrna.do?gene=2538&matureName=hsa-miR-196a*&organism=9606
hsa-miR-196a-3p	MIMAT0004562	hsa-miR-196a*	8434	RECK	-0.17	http://www.microrna.org/microrna/getMrna.do?gene=8434&matureName=hsa-miR-196a*&organism=9606
hsa-miR-196a-3p	MIMAT0004562	hsa-miR-196a*	51186	WBP5	-0.32	http://www.microrna.org/microrna/getMrna.do?gene=51186&matureName=hsa-miR-196a*&organism=9606
hsa-miR-196a-3p	MIMAT0004562	hsa-miR-196a*	57120	GOPC	-0.23	http://www.microrna.org/microrna/getMrna.do?gene=57120&matureName=hsa-miR-196a*&organism=9606
hsa-miR-196a-3p	MIMAT0004562	hsa-miR-196a*	137872	ADHFE1	-0.17	http://www.microrna.org/microrna/getMrna.do?gene=137872&matureName=hsa-miR-196a*&organism=9606
hsa-miR-196a-3p	MIMAT0004562	hsa-miR-196a*	317	APAF1	-0.16	http://www.microrna.org/microrna/getMrna.do?gene=317&matureName=hsa-miR-196a*&organism=9606
hsa-miR-196a-3p	MIMAT0004562	hsa-miR-196a*	55092	TMEM51	-0.24	http://www.microrna.org/microrna/getMrna.do?gene=55092&matureName=hsa-miR-196a*&organism=9606
hsa-miR-196a-3p	MIMAT0004562	hsa-miR-196a*	83988	NCALD	-0.72	http://www.microrna.org/microrna/getMrna.do?gene=83988&matureName=hsa-miR-196a*&organism=9606
hsa-miR-196a-3p	MIMAT0004562	hsa-miR-196a*	64946	CENPH	-0.28	http://www.microrna.org/microrna/getMrna.do?gene=64946&matureName=hsa-miR-196a*&organism=9606
hsa-miR-196a-3p	MIMAT0004562	hsa-miR-196a*	816	CAMK2B	-0.12	http://www.microrna.org/microrna/getMrna.do?gene=816&matureName=hsa-miR-196a*&organism=9606
hsa-miR-196a-3p	MIMAT0004562	hsa-miR-196a*	26095	PTPN20B	-0.58	http://www.microrna.org/microrna/getMrna.do?gene=26095&matureName=hsa-miR-196a*&organism=9606
hsa-miR-196a-3p	MIMAT0004562	hsa-miR-196a*	2673	GFPT1	-0.12	http://www.microrna.org/microrna/getMrna.do?gene=2673&matureName=hsa-miR-196a*&organism=9606
hsa-miR-196a-3p	MIMAT0004562	hsa-miR-196a*	23291	FBXW11	-0.11	http://www.microrna.org/microrna/getMrna.do?gene=23291&matureName=hsa-miR-196a*&organism=9606
hsa-miR-196a-3p	MIMAT0004562	hsa-miR-196a*	54901	CDKAL1	-0.21	http://www.microrna.org/microrna/getMrna.do?gene=54901&matureName=hsa-miR-196a*&organism=9606
hsa-miR-196a-3p	MIMAT0004562	hsa-miR-196a*	146712	B3GNTL1	-0.37	http://www.microrna.org/microrna/getMrna.do?gene=146712&matureName=hsa-miR-196a*&organism=9606
hsa-miR-196a-3p	MIMAT0004562	hsa-miR-196a*	222643	UNC5CL	-0.85	http://www.microrna.org/microrna/getMrna.do?gene=222643&matureName=hsa-miR-196a*&organism=9606
hsa-miR-196a-3p	MIMAT0004562	hsa-miR-196a*	56658	TRIM39	-0.99	http://www.microrna.org/microrna/getMrna.do?gene=56658&matureName=hsa-miR-196a*&organism=9606
hsa-miR-196a-3p	MIMAT0004562	hsa-miR-196a*	112	ADCY6	-0.7	http://www.microrna.org/microrna/getMrna.do?gene=112&matureName=hsa-miR-196a*&organism=9606
hsa-miR-196a-3p	MIMAT0004562	hsa-miR-196a*	11240	PADI2	-0.52	http://www.microrna.org/microrna/getMrna.do?gene=11240&matureName=hsa-miR-196a*&organism=9606
hsa-miR-196a-3p	MIMAT0004562	hsa-miR-196a*	11240	PADI2	-0.15	http://www.microrna.org/microrna/getMrna.do?gene=11240&matureName=hsa-miR-196a*&organism=9606
hsa-miR-196a-3p	MIMAT0004562	hsa-miR-196a*	5894	RAF1	-0.69	http://www.microrna.org/microrna/getMrna.do?gene=5894&matureName=hsa-miR-196a*&organism=9606
hsa-miR-196a-3p	MIMAT0004562	hsa-miR-196a*	254427	C10orf47	-1.22	http://www.microrna.org/microrna/getMrna.do?gene=254427&matureName=hsa-miR-196a*&organism=9606
hsa-miR-196a-3p	MIMAT0004562	hsa-miR-196a*	3925	STMN1	-0.14	http://www.microrna.org/microrna/getMrna.do?gene=3925&matureName=hsa-miR-196a*&organism=9606
hsa-miR-196a-3p	MIMAT0004562	hsa-miR-196a*	284294	LOC284294	-0.18	http://www.microrna.org/microrna/getMrna.do?gene=284294&matureName=hsa-miR-196a*&organism=9606
hsa-miR-196a-3p	MIMAT0004562	hsa-miR-196a*	5627	PROS1	-0.13	http://www.microrna.org/microrna/getMrna.do?gene=5627&matureName=hsa-miR-196a*&organism=9606
hsa-miR-196a-3p	MIMAT0004562	hsa-miR-196a*	92906	HNRPLL	-0.95	http://www.microrna.org/microrna/getMrna.do?gene=92906&matureName=hsa-miR-196a*&organism=9606
hsa-miR-196a-3p	MIMAT0004562	hsa-miR-196a*	92906	HNRPLL	-0.23	http://www.microrna.org/microrna/getMrna.do?gene=92906&matureName=hsa-miR-196a*&organism=9606
hsa-miR-196a-3p	MIMAT0004562	hsa-miR-196a*	55209	SETD5	-0.41	http://www.microrna.org/microrna/getMrna.do?gene=55209&matureName=hsa-miR-196a*&organism=9606
hsa-miR-196a-3p	MIMAT0004562	hsa-miR-196a*	55209	SETD5	-0.15	http://www.microrna.org/microrna/getMrna.do?gene=55209&matureName=hsa-miR-196a*&organism=9606
hsa-miR-196a-3p	MIMAT0004562	hsa-miR-196a*	23603	CORO1C	-1.26	http://www.microrna.org/microrna/getMrna.do?gene=23603&matureName=hsa-miR-196a*&organism=9606
hsa-miR-196a-3p	MIMAT0004562	hsa-miR-196a*	7518	XRCC4	-0.18	http://www.microrna.org/microrna/getMrna.do?gene=7518&matureName=hsa-miR-196a*&organism=9606
hsa-miR-196a-3p	MIMAT0004562	hsa-miR-196a*	10560	SLC19A2	-0.81	http://www.microrna.org/microrna/getMrna.do?gene=10560&matureName=hsa-miR-196a*&organism=9606
hsa-miR-196a-3p	MIMAT0004562	hsa-miR-196a*	6517	SLC2A4	-0.43	http://www.microrna.org/microrna/getMrna.do?gene=6517&matureName=hsa-miR-196a*&organism=9606
hsa-miR-196a-3p	MIMAT0004562	hsa-miR-196a*	163859	C1orf55	-0.2	http://www.microrna.org/microrna/getMrna.do?gene=163859&matureName=hsa-miR-196a*&organism=9606
hsa-miR-196a-3p	MIMAT0004562	hsa-miR-196a*	84617	TUBB6	-0.64	http://www.microrna.org/microrna/getMrna.do?gene=84617&matureName=hsa-miR-196a*&organism=9606
hsa-miR-196a-3p	MIMAT0004562	hsa-miR-196a*	10124	ARL4A	-0.35	http://www.microrna.org/microrna/getMrna.do?gene=10124&matureName=hsa-miR-196a*&organism=9606
hsa-miR-196a-3p	MIMAT0004562	hsa-miR-196a*	10124	ARL4A	-0.18	http://www.microrna.org/microrna/getMrna.do?gene=10124&matureName=hsa-miR-196a*&organism=9606
hsa-miR-196a-3p	MIMAT0004562	hsa-miR-196a*	92737	DNER	-0.18	http://www.microrna.org/microrna/getMrna.do?gene=92737&matureName=hsa-miR-196a*&organism=9606
hsa-miR-196a-3p	MIMAT0004562	hsa-miR-196a*	375748	C9orf102	-0.37	http://www.microrna.org/microrna/getMrna.do?gene=375748&matureName=hsa-miR-196a*&organism=9606
hsa-miR-196a-3p	MIMAT0004562	hsa-miR-196a*	5046	PCSK6	-1.26	http://www.microrna.org/microrna/getMrna.do?gene=5046&matureName=hsa-miR-196a*&organism=9606
hsa-miR-196a-3p	MIMAT0004562	hsa-miR-196a*	126823	KLHDC9	-0.17	http://www.microrna.org/microrna/getMrna.do?gene=126823&matureName=hsa-miR-196a*&organism=9606
hsa-miR-196a-3p	MIMAT0004562	hsa-miR-196a*	2889	RAPGEF1	-0.22	http://www.microrna.org/microrna/getMrna.do?gene=2889&matureName=hsa-miR-196a*&organism=9606
hsa-miR-196a-3p	MIMAT0004562	hsa-miR-196a*	2835	GPR12	-0.75	http://www.microrna.org/microrna/getMrna.do?gene=2835&matureName=hsa-miR-196a*&organism=9606
hsa-miR-196a-3p	MIMAT0004562	hsa-miR-196a*	3937	LCP2	-0.44	http://www.microrna.org/microrna/getMrna.do?gene=3937&matureName=hsa-miR-196a*&organism=9606
hsa-miR-196a-3p	MIMAT0004562	hsa-miR-196a*	57531	HACE1	-0.51	http://www.microrna.org/microrna/getMrna.do?gene=57531&matureName=hsa-miR-196a*&organism=9606
hsa-miR-196a-3p	MIMAT0004562	hsa-miR-196a*	54626	HES2	-0.29	http://www.microrna.org/microrna/getMrna.do?gene=54626&matureName=hsa-miR-196a*&organism=9606
hsa-miR-196a-3p	MIMAT0004562	hsa-miR-196a*	339290	LOC339290	-0.23	http://www.microrna.org/microrna/getMrna.do?gene=339290&matureName=hsa-miR-196a*&organism=9606
hsa-miR-196a-3p	MIMAT0004562	hsa-miR-196a*	51164	DCTN4	-1.05	http://www.microrna.org/microrna/getMrna.do?gene=51164&matureName=hsa-miR-196a*&organism=9606
hsa-miR-196a-3p	MIMAT0004562	hsa-miR-196a*	2104	ESRRG	-0.49	http://www.microrna.org/microrna/getMrna.do?gene=2104&matureName=hsa-miR-196a*&organism=9606
hsa-miR-196a-3p	MIMAT0004562	hsa-miR-196a*	665	BNIP3L	-0.26	http://www.microrna.org/microrna/getMrna.do?gene=665&matureName=hsa-miR-196a*&organism=9606
hsa-miR-196a-3p	MIMAT0004562	hsa-miR-196a*	80010	RMI1	-0.38	http://www.microrna.org/microrna/getMrna.do?gene=80010&matureName=hsa-miR-196a*&organism=9606
hsa-miR-196a-3p	MIMAT0004562	hsa-miR-196a*	7905	REEP5	-0.99	http://www.microrna.org/microrna/getMrna.do?gene=7905&matureName=hsa-miR-196a*&organism=9606
hsa-miR-196a-3p	MIMAT0004562	hsa-miR-196a*	7332	UBE2L3	-0.11	http://www.microrna.org/microrna/getMrna.do?gene=7332&matureName=hsa-miR-196a*&organism=9606
hsa-miR-196a-3p	MIMAT0004562	hsa-miR-196a*	85417	CCNB3	-0.2	http://www.microrna.org/microrna/getMrna.do?gene=85417&matureName=hsa-miR-196a*&organism=9606
hsa-miR-196a-3p	MIMAT0004562	hsa-miR-196a*	51141	INSIG2	-1.23	http://www.microrna.org/microrna/getMrna.do?gene=51141&matureName=hsa-miR-196a*&organism=9606
hsa-miR-196a-3p	MIMAT0004562	hsa-miR-196a*	142685	ASB15	-0.81	http://www.microrna.org/microrna/getMrna.do?gene=142685&matureName=hsa-miR-196a*&organism=9606
hsa-miR-196a-3p	MIMAT0004562	hsa-miR-196a*	92370	ACPL2	-1.32	http://www.microrna.org/microrna/getMrna.do?gene=92370&matureName=hsa-miR-196a*&organism=9606
hsa-miR-196a-3p	MIMAT0004562	hsa-miR-196a*	5194	PEX13	-0.18	http://www.microrna.org/microrna/getMrna.do?gene=5194&matureName=hsa-miR-196a*&organism=9606
hsa-miR-196a-3p	MIMAT0004562	hsa-miR-196a*	10181	RBM5	-0.21	http://www.microrna.org/microrna/getMrna.do?gene=10181&matureName=hsa-miR-196a*&organism=9606
hsa-miR-196a-3p	MIMAT0004562	hsa-miR-196a*	5450	POU2AF1	-0.86	http://www.microrna.org/microrna/getMrna.do?gene=5450&matureName=hsa-miR-196a*&organism=9606
hsa-miR-196a-3p	MIMAT0004562	hsa-miR-196a*	9788	MTSS1	-1.32	http://www.microrna.org/microrna/getMrna.do?gene=9788&matureName=hsa-miR-196a*&organism=9606
hsa-miR-196a-3p	MIMAT0004562	hsa-miR-196a*	9633	MTL5	-0.52	http://www.microrna.org/microrna/getMrna.do?gene=9633&matureName=hsa-miR-196a*&organism=9606
hsa-miR-196a-3p	MIMAT0004562	hsa-miR-196a*	22854	NTNG1	-0.12	http://www.microrna.org/microrna/getMrna.do?gene=22854&matureName=hsa-miR-196a*&organism=9606
hsa-miR-196a-3p	MIMAT0004562	hsa-miR-196a*	29058	C20orf30	-0.37	http://www.microrna.org/microrna/getMrna.do?gene=29058&matureName=hsa-miR-196a*&organism=9606
hsa-miR-196a-3p	MIMAT0004562	hsa-miR-196a*	1073	CFL2	-0.7	http://www.microrna.org/microrna/getMrna.do?gene=1073&matureName=hsa-miR-196a*&organism=9606
hsa-miR-196a-3p	MIMAT0004562	hsa-miR-196a*	1073	CFL2	-0.36	http://www.microrna.org/microrna/getMrna.do?gene=1073&matureName=hsa-miR-196a*&organism=9606
hsa-miR-196a-3p	MIMAT0004562	hsa-miR-196a*	440888	FKSG73	-0.12	http://www.microrna.org/microrna/getMrna.do?gene=440888&matureName=hsa-miR-196a*&organism=9606
hsa-miR-196a-3p	MIMAT0004562	hsa-miR-196a*	10105	PPIF	-0.16	http://www.microrna.org/microrna/getMrna.do?gene=10105&matureName=hsa-miR-196a*&organism=9606
hsa-miR-196a-3p	MIMAT0004562	hsa-miR-196a*	4897	NRCAM	-0.86	http://www.microrna.org/microrna/getMrna.do?gene=4897&matureName=hsa-miR-196a*&organism=9606
hsa-miR-196a-3p	MIMAT0004562	hsa-miR-196a*	2181	ACSL3	-0.28	http://www.microrna.org/microrna/getMrna.do?gene=2181&matureName=hsa-miR-196a*&organism=9606
hsa-miR-196a-3p	MIMAT0004562	hsa-miR-196a*	4649	MYO9A	-0.36	http://www.microrna.org/microrna/getMrna.do?gene=4649&matureName=hsa-miR-196a*&organism=9606
hsa-miR-196a-3p	MIMAT0004562	hsa-miR-196a*	123283	TARSL2	-0.12	http://www.microrna.org/microrna/getMrna.do?gene=123283&matureName=hsa-miR-196a*&organism=9606
hsa-miR-196a-3p	MIMAT0004562	hsa-miR-196a*	54097	FAM3B	-0.18	http://www.microrna.org/microrna/getMrna.do?gene=54097&matureName=hsa-miR-196a*&organism=9606
hsa-miR-196a-3p	MIMAT0004562	hsa-miR-196a*	54097	FAM3B	-0.76	http://www.microrna.org/microrna/getMrna.do?gene=54097&matureName=hsa-miR-196a*&organism=9606
hsa-miR-196a-3p	MIMAT0004562	hsa-miR-196a*	64581	CLEC7A	-0.13	http://www.microrna.org/microrna/getMrna.do?gene=64581&matureName=hsa-miR-196a*&organism=9606
hsa-miR-196a-3p	MIMAT0004562	hsa-miR-196a*	64581	CLEC7A	-0.18	http://www.microrna.org/microrna/getMrna.do?gene=64581&matureName=hsa-miR-196a*&organism=9606
hsa-miR-196a-3p	MIMAT0004562	hsa-miR-196a*	2914	GRM4	-0.59	http://www.microrna.org/microrna/getMrna.do?gene=2914&matureName=hsa-miR-196a*&organism=9606
hsa-miR-196a-3p	MIMAT0004562	hsa-miR-196a*	60625	DHX35	-0.24	http://www.microrna.org/microrna/getMrna.do?gene=60625&matureName=hsa-miR-196a*&organism=9606
hsa-miR-196a-3p	MIMAT0004562	hsa-miR-196a*	7267	TTC3	-0.23	http://www.microrna.org/microrna/getMrna.do?gene=7267&matureName=hsa-miR-196a*&organism=9606
hsa-miR-196a-3p	MIMAT0004562	hsa-miR-196a*	56977	STOX2	-0.19	http://www.microrna.org/microrna/getMrna.do?gene=56977&matureName=hsa-miR-196a*&organism=9606
hsa-miR-196a-3p	MIMAT0004562	hsa-miR-196a*	79832	QSER1	-0.4	http://www.microrna.org/microrna/getMrna.do?gene=79832&matureName=hsa-miR-196a*&organism=9606
hsa-miR-196a-3p	MIMAT0004562	hsa-miR-196a*	26140	TTLL3	-0.29	http://www.microrna.org/microrna/getMrna.do?gene=26140&matureName=hsa-miR-196a*&organism=9606
hsa-miR-196a-3p	MIMAT0004562	hsa-miR-196a*	81786	TRIM7	-0.2	http://www.microrna.org/microrna/getMrna.do?gene=81786&matureName=hsa-miR-196a*&organism=9606
hsa-miR-196a-3p	MIMAT0004562	hsa-miR-196a*	91373	UAP1L1	-0.15	http://www.microrna.org/microrna/getMrna.do?gene=91373&matureName=hsa-miR-196a*&organism=9606
hsa-miR-196a-3p	MIMAT0004562	hsa-miR-196a*	9659	PDE4DIP	-0.12	http://www.microrna.org/microrna/getMrna.do?gene=9659&matureName=hsa-miR-196a*&organism=9606
hsa-miR-196a-3p	MIMAT0004562	hsa-miR-196a*	6002	RGS12	-0.54	http://www.microrna.org/microrna/getMrna.do?gene=6002&matureName=hsa-miR-196a*&organism=9606
hsa-miR-196a-3p	MIMAT0004562	hsa-miR-196a*	9235	IL32	-0.21	http://www.microrna.org/microrna/getMrna.do?gene=9235&matureName=hsa-miR-196a*&organism=9606
hsa-miR-196a-3p	MIMAT0004562	hsa-miR-196a*	26095	PTPN20B	-0.54	http://www.microrna.org/microrna/getMrna.do?gene=26095&matureName=hsa-miR-196a*&organism=9606
hsa-miR-196a-3p	MIMAT0004562	hsa-miR-196a*	169792	GLIS3	-0.32	http://www.microrna.org/microrna/getMrna.do?gene=169792&matureName=hsa-miR-196a*&organism=9606
hsa-miR-196a-3p	MIMAT0004562	hsa-miR-196a*	2099	ESR1	-0.12	http://www.microrna.org/microrna/getMrna.do?gene=2099&matureName=hsa-miR-196a*&organism=9606
hsa-miR-196a-3p	MIMAT0004562	hsa-miR-196a*	546	ATRX	-0.57	http://www.microrna.org/microrna/getMrna.do?gene=546&matureName=hsa-miR-196a*&organism=9606
hsa-miR-196a-3p	MIMAT0004562	hsa-miR-196a*	783	CACNB2	-0.26	http://www.microrna.org/microrna/getMrna.do?gene=783&matureName=hsa-miR-196a*&organism=9606
hsa-miR-196a-3p	MIMAT0004562	hsa-miR-196a*	144108	SPTY2D1	-0.47	http://www.microrna.org/microrna/getMrna.do?gene=144108&matureName=hsa-miR-196a*&organism=9606
hsa-miR-196a-3p	MIMAT0004562	hsa-miR-196a*	144108	SPTY2D1	-0.27	http://www.microrna.org/microrna/getMrna.do?gene=144108&matureName=hsa-miR-196a*&organism=9606
hsa-miR-196a-3p	MIMAT0004562	hsa-miR-196a*	5529	PPP2R5E	-1.09	http://www.microrna.org/microrna/getMrna.do?gene=5529&matureName=hsa-miR-196a*&organism=9606
hsa-miR-196a-3p	MIMAT0004562	hsa-miR-196a*	51203	NUSAP1	-0.12	http://www.microrna.org/microrna/getMrna.do?gene=51203&matureName=hsa-miR-196a*&organism=9606
hsa-miR-196a-3p	MIMAT0004562	hsa-miR-196a*	25897	RNF19A	-1.01	http://www.microrna.org/microrna/getMrna.do?gene=25897&matureName=hsa-miR-196a*&organism=9606
hsa-miR-196a-3p	MIMAT0004562	hsa-miR-196a*	54682	MANSC1	-0.16	http://www.microrna.org/microrna/getMrna.do?gene=54682&matureName=hsa-miR-196a*&organism=9606
hsa-miR-196a-3p	MIMAT0004562	hsa-miR-196a*	5168	ENPP2	-0.17	http://www.microrna.org/microrna/getMrna.do?gene=5168&matureName=hsa-miR-196a*&organism=9606
hsa-miR-196a-3p	MIMAT0004562	hsa-miR-196a*	5168	ENPP2	-0.54	http://www.microrna.org/microrna/getMrna.do?gene=5168&matureName=hsa-miR-196a*&organism=9606
hsa-miR-196a-3p	MIMAT0004562	hsa-miR-196a*	8437	RASAL1	-0.58	http://www.microrna.org/microrna/getMrna.do?gene=8437&matureName=hsa-miR-196a*&organism=9606
hsa-miR-196a-3p	MIMAT0004562	hsa-miR-196a*	54509	RHOF	-0.68	http://www.microrna.org/microrna/getMrna.do?gene=54509&matureName=hsa-miR-196a*&organism=9606
hsa-miR-196a-3p	MIMAT0004562	hsa-miR-196a*	56658	TRIM39	-1.03	http://www.microrna.org/microrna/getMrna.do?gene=56658&matureName=hsa-miR-196a*&organism=9606
hsa-miR-196a-3p	MIMAT0004562	hsa-miR-196a*	57176	VARS2	-0.12	http://www.microrna.org/microrna/getMrna.do?gene=57176&matureName=hsa-miR-196a*&organism=9606
hsa-miR-196a-3p	MIMAT0004562	hsa-miR-196a*	57532	NUFIP2	-0.1	http://www.microrna.org/microrna/getMrna.do?gene=57532&matureName=hsa-miR-196a*&organism=9606
hsa-miR-196a-3p	MIMAT0004562	hsa-miR-196a*	7750	ZMYM2	-0.37	http://www.microrna.org/microrna/getMrna.do?gene=7750&matureName=hsa-miR-196a*&organism=9606
hsa-miR-196a-3p	MIMAT0004562	hsa-miR-196a*	27159	CHIA	-0.59	http://www.microrna.org/microrna/getMrna.do?gene=27159&matureName=hsa-miR-196a*&organism=9606
hsa-miR-196a-3p	MIMAT0004562	hsa-miR-196a*	57691	KIAA1586	-0.1	http://www.microrna.org/microrna/getMrna.do?gene=57691&matureName=hsa-miR-196a*&organism=9606
hsa-miR-196a-3p	MIMAT0004562	hsa-miR-196a*	392307	C9orf128	-0.6	http://www.microrna.org/microrna/getMrna.do?gene=392307&matureName=hsa-miR-196a*&organism=9606
hsa-miR-196a-3p	MIMAT0004562	hsa-miR-196a*	5870	RAB6A	-0.15	http://www.microrna.org/microrna/getMrna.do?gene=5870&matureName=hsa-miR-196a*&organism=9606
hsa-miR-196a-3p	MIMAT0004562	hsa-miR-196a*	7730	ZNF177	-0.21	http://www.microrna.org/microrna/getMrna.do?gene=7730&matureName=hsa-miR-196a*&organism=9606
hsa-miR-196a-3p	MIMAT0004562	hsa-miR-196a*	152404	IGSF11	-0.1	http://www.microrna.org/microrna/getMrna.do?gene=152404&matureName=hsa-miR-196a*&organism=9606
hsa-miR-196a-3p	MIMAT0004562	hsa-miR-196a*	87	ACTN1	-0.11	http://www.microrna.org/microrna/getMrna.do?gene=87&matureName=hsa-miR-196a*&organism=9606
hsa-miR-196a-3p	MIMAT0004562	hsa-miR-196a*	1488	CTBP2	-0.1	http://www.microrna.org/microrna/getMrna.do?gene=1488&matureName=hsa-miR-196a*&organism=9606
hsa-miR-196a-3p	MIMAT0004562	hsa-miR-196a*	26049	FAM169A	-0.33	http://www.microrna.org/microrna/getMrna.do?gene=26049&matureName=hsa-miR-196a*&organism=9606
hsa-miR-196a-3p	MIMAT0004562	hsa-miR-196a*	128387	TATDN3	-0.11	http://www.microrna.org/microrna/getMrna.do?gene=128387&matureName=hsa-miR-196a*&organism=9606
hsa-miR-196a-3p	MIMAT0004562	hsa-miR-196a*	1121	CHM	-0.3	http://www.microrna.org/microrna/getMrna.do?gene=1121&matureName=hsa-miR-196a*&organism=9606
hsa-miR-196a-3p	MIMAT0004562	hsa-miR-196a*	1121	CHM	-0.16	http://www.microrna.org/microrna/getMrna.do?gene=1121&matureName=hsa-miR-196a*&organism=9606
hsa-miR-196a-3p	MIMAT0004562	hsa-miR-196a*	2001	ELF5	-0.21	http://www.microrna.org/microrna/getMrna.do?gene=2001&matureName=hsa-miR-196a*&organism=9606
hsa-miR-196a-3p	MIMAT0004562	hsa-miR-196a*	84766	EFCAB4B	-0.15	http://www.microrna.org/microrna/getMrna.do?gene=84766&matureName=hsa-miR-196a*&organism=9606
hsa-miR-196a-3p	MIMAT0004562	hsa-miR-196a*	79969	C6orf134	-0.63	http://www.microrna.org/microrna/getMrna.do?gene=79969&matureName=hsa-miR-196a*&organism=9606
hsa-miR-196a-3p	MIMAT0004562	hsa-miR-196a*	65084	TMEM135	-0.13	http://www.microrna.org/microrna/getMrna.do?gene=65084&matureName=hsa-miR-196a*&organism=9606
hsa-miR-196a-3p	MIMAT0004562	hsa-miR-196a*	65084	TMEM135	-0.1	http://www.microrna.org/microrna/getMrna.do?gene=65084&matureName=hsa-miR-196a*&organism=9606
hsa-miR-196a-3p	MIMAT0004562	hsa-miR-196a*	4651	MYO10	-0.39	http://www.microrna.org/microrna/getMrna.do?gene=4651&matureName=hsa-miR-196a*&organism=9606
hsa-miR-196a-3p	MIMAT0004562	hsa-miR-196a*	56911	C21orf7	-0.57	http://www.microrna.org/microrna/getMrna.do?gene=56911&matureName=hsa-miR-196a*&organism=9606
hsa-miR-196a-3p	MIMAT0004562	hsa-miR-196a*	2273	FHL1	-0.67	http://www.microrna.org/microrna/getMrna.do?gene=2273&matureName=hsa-miR-196a*&organism=9606
hsa-miR-196a-3p	MIMAT0004562	hsa-miR-196a*	9374	PPT2	-0.22	http://www.microrna.org/microrna/getMrna.do?gene=9374&matureName=hsa-miR-196a*&organism=9606
hsa-miR-196a-3p	MIMAT0004562	hsa-miR-196a*	2122	MECOM	-0.1	http://www.microrna.org/microrna/getMrna.do?gene=2122&matureName=hsa-miR-196a*&organism=9606
hsa-miR-196a-3p	MIMAT0004562	hsa-miR-196a*	348035	MGC40069	-0.32	http://www.microrna.org/microrna/getMrna.do?gene=348035&matureName=hsa-miR-196a*&organism=9606
hsa-miR-196a-3p	MIMAT0004562	hsa-miR-196a*	56672	C11orf17	-0.13	http://www.microrna.org/microrna/getMrna.do?gene=56672&matureName=hsa-miR-196a*&organism=9606
hsa-miR-196a-3p	MIMAT0004562	hsa-miR-196a*	83478	ARHGAP24	-0.13	http://www.microrna.org/microrna/getMrna.do?gene=83478&matureName=hsa-miR-196a*&organism=9606
hsa-miR-196a-3p	MIMAT0004562	hsa-miR-196a*	57182	ANKRD50	-0.38	http://www.microrna.org/microrna/getMrna.do?gene=57182&matureName=hsa-miR-196a*&organism=9606
hsa-miR-196a-3p	MIMAT0004562	hsa-miR-196a*	26240	FAM50B	-0.59	http://www.microrna.org/microrna/getMrna.do?gene=26240&matureName=hsa-miR-196a*&organism=9606
hsa-miR-196a-3p	MIMAT0004562	hsa-miR-196a*	8555	CDC14B	-0.17	http://www.microrna.org/microrna/getMrna.do?gene=8555&matureName=hsa-miR-196a*&organism=9606
hsa-miR-196a-3p	MIMAT0004562	hsa-miR-196a*	57447	NDRG2	-0.6	http://www.microrna.org/microrna/getMrna.do?gene=57447&matureName=hsa-miR-196a*&organism=9606
hsa-miR-196a-3p	MIMAT0004562	hsa-miR-196a*	10659	CELF2	-0.62	http://www.microrna.org/microrna/getMrna.do?gene=10659&matureName=hsa-miR-196a*&organism=9606
hsa-miR-196a-3p	MIMAT0004562	hsa-miR-196a*	10659	CELF2	-0.42	http://www.microrna.org/microrna/getMrna.do?gene=10659&matureName=hsa-miR-196a*&organism=9606
hsa-miR-196a-3p	MIMAT0004562	hsa-miR-196a*	53942	CNTN5	-0.13	http://www.microrna.org/microrna/getMrna.do?gene=53942&matureName=hsa-miR-196a*&organism=9606
hsa-miR-196a-3p	MIMAT0004562	hsa-miR-196a*	4983	OPHN1	-0.13	http://www.microrna.org/microrna/getMrna.do?gene=4983&matureName=hsa-miR-196a*&organism=9606
hsa-miR-196a-3p	MIMAT0004562	hsa-miR-196a*	90925	LOC90925	-0.53	http://www.microrna.org/microrna/getMrna.do?gene=90925&matureName=hsa-miR-196a*&organism=9606
hsa-miR-196a-3p	MIMAT0004562	hsa-miR-196a*	63908	NAPB	-0.66	http://www.microrna.org/microrna/getMrna.do?gene=63908&matureName=hsa-miR-196a*&organism=9606
hsa-miR-196a-3p	MIMAT0004562	hsa-miR-196a*	63908	NAPB	-0.42	http://www.microrna.org/microrna/getMrna.do?gene=63908&matureName=hsa-miR-196a*&organism=9606
hsa-miR-196a-3p	MIMAT0004562	hsa-miR-196a*	50809	HP1BP3	-1.06	http://www.microrna.org/microrna/getMrna.do?gene=50809&matureName=hsa-miR-196a*&organism=9606
hsa-miR-196a-3p	MIMAT0004562	hsa-miR-196a*	30010	NXPH1	-0.38	http://www.microrna.org/microrna/getMrna.do?gene=30010&matureName=hsa-miR-196a*&organism=9606
hsa-miR-196a-3p	MIMAT0004562	hsa-miR-196a*	1537	CYC1	-0.68	http://www.microrna.org/microrna/getMrna.do?gene=1537&matureName=hsa-miR-196a*&organism=9606
hsa-miR-196a-3p	MIMAT0004562	hsa-miR-196a*	57213	C13orf1	-0.4	http://www.microrna.org/microrna/getMrna.do?gene=57213&matureName=hsa-miR-196a*&organism=9606
hsa-miR-196a-3p	MIMAT0004562	hsa-miR-196a*	3189	HNRNPH3	-0.21	http://www.microrna.org/microrna/getMrna.do?gene=3189&matureName=hsa-miR-196a*&organism=9606
hsa-miR-196a-3p	MIMAT0004562	hsa-miR-196a*	389058	SP5	-0.13	http://www.microrna.org/microrna/getMrna.do?gene=389058&matureName=hsa-miR-196a*&organism=9606
hsa-miR-196a-3p	MIMAT0004562	hsa-miR-196a*	7311	UBA52	-0.17	http://www.microrna.org/microrna/getMrna.do?gene=7311&matureName=hsa-miR-196a*&organism=9606
hsa-miR-196a-3p	MIMAT0004562	hsa-miR-196a*	7311	UBA52	-0.14	http://www.microrna.org/microrna/getMrna.do?gene=7311&matureName=hsa-miR-196a*&organism=9606
hsa-miR-196a-3p	MIMAT0004562	hsa-miR-196a*	90861	HN1L	-0.28	http://www.microrna.org/microrna/getMrna.do?gene=90861&matureName=hsa-miR-196a*&organism=9606
hsa-miR-196a-3p	MIMAT0004562	hsa-miR-196a*	2070	EYA4	-0.82	http://www.microrna.org/microrna/getMrna.do?gene=2070&matureName=hsa-miR-196a*&organism=9606
hsa-miR-196a-3p	MIMAT0004562	hsa-miR-196a*	7204	TRIO	-0.8	http://www.microrna.org/microrna/getMrna.do?gene=7204&matureName=hsa-miR-196a*&organism=9606
hsa-miR-196a-3p	MIMAT0004562	hsa-miR-196a*	7813	EVI5	-0.34	http://www.microrna.org/microrna/getMrna.do?gene=7813&matureName=hsa-miR-196a*&organism=9606
hsa-miR-196a-3p	MIMAT0004562	hsa-miR-196a*	7111	TMOD1	-0.13	http://www.microrna.org/microrna/getMrna.do?gene=7111&matureName=hsa-miR-196a*&organism=9606
hsa-miR-196a-3p	MIMAT0004562	hsa-miR-196a*	10087	COL4A3BP	-0.76	http://www.microrna.org/microrna/getMrna.do?gene=10087&matureName=hsa-miR-196a*&organism=9606
hsa-miR-196a-3p	MIMAT0004562	hsa-miR-196a*	6722	SRF	-0.91	http://www.microrna.org/microrna/getMrna.do?gene=6722&matureName=hsa-miR-196a*&organism=9606
hsa-miR-196a-3p	MIMAT0004562	hsa-miR-196a*	5915	RARB	-1.04	http://www.microrna.org/microrna/getMrna.do?gene=5915&matureName=hsa-miR-196a*&organism=9606
hsa-miR-196a-3p	MIMAT0004562	hsa-miR-196a*	1740	DLG2	-0.62	http://www.microrna.org/microrna/getMrna.do?gene=1740&matureName=hsa-miR-196a*&organism=9606
hsa-miR-196a-3p	MIMAT0004562	hsa-miR-196a*	153443	SRFBP1	-0.15	http://www.microrna.org/microrna/getMrna.do?gene=153443&matureName=hsa-miR-196a*&organism=9606
hsa-miR-196a-3p	MIMAT0004562	hsa-miR-196a*	5160	PDHA1	-0.2	http://www.microrna.org/microrna/getMrna.do?gene=5160&matureName=hsa-miR-196a*&organism=9606
hsa-miR-196a-3p	MIMAT0004562	hsa-miR-196a*	4140	MARK3	-0.14	http://www.microrna.org/microrna/getMrna.do?gene=4140&matureName=hsa-miR-196a*&organism=9606
hsa-miR-196a-3p	MIMAT0004562	hsa-miR-196a*	27067	STAU2	-0.63	http://www.microrna.org/microrna/getMrna.do?gene=27067&matureName=hsa-miR-196a*&organism=9606
hsa-miR-196a-3p	MIMAT0004562	hsa-miR-196a*	653129	PTPN20A	-0.67	http://www.microrna.org/microrna/getMrna.do?gene=653129&matureName=hsa-miR-196a*&organism=9606
hsa-miR-196a-3p	MIMAT0004562	hsa-miR-196a*	286223	C9orf47	-0.55	http://www.microrna.org/microrna/getMrna.do?gene=286223&matureName=hsa-miR-196a*&organism=9606
hsa-miR-196a-3p	MIMAT0004562	hsa-miR-196a*	200879	LIPH	-0.41	http://www.microrna.org/microrna/getMrna.do?gene=200879&matureName=hsa-miR-196a*&organism=9606
hsa-miR-196a-3p	MIMAT0004562	hsa-miR-196a*	83448	PUS7L	-0.55	http://www.microrna.org/microrna/getMrna.do?gene=83448&matureName=hsa-miR-196a*&organism=9606
hsa-miR-196a-3p	MIMAT0004562	hsa-miR-196a*	9882	TBC1D4	-0.1	http://www.microrna.org/microrna/getMrna.do?gene=9882&matureName=hsa-miR-196a*&organism=9606
hsa-miR-196a-3p	MIMAT0004562	hsa-miR-196a*	9882	TBC1D4	-0.36	http://www.microrna.org/microrna/getMrna.do?gene=9882&matureName=hsa-miR-196a*&organism=9606
hsa-miR-196a-3p	MIMAT0004562	hsa-miR-196a*	6744	SSFA2	-0.18	http://www.microrna.org/microrna/getMrna.do?gene=6744&matureName=hsa-miR-196a*&organism=9606
hsa-miR-196a-3p	MIMAT0004562	hsa-miR-196a*	30820	KCNIP1	-0.79	http://www.microrna.org/microrna/getMrna.do?gene=30820&matureName=hsa-miR-196a*&organism=9606
hsa-miR-196a-3p	MIMAT0004562	hsa-miR-196a*	127253	TYW3	-0.21	http://www.microrna.org/microrna/getMrna.do?gene=127253&matureName=hsa-miR-196a*&organism=9606
hsa-miR-196a-3p	MIMAT0004562	hsa-miR-196a*	55471	C2orf56	-0.24	http://www.microrna.org/microrna/getMrna.do?gene=55471&matureName=hsa-miR-196a*&organism=9606
hsa-miR-196a-3p	MIMAT0004562	hsa-miR-196a*	5229	PGGT1B	-0.2	http://www.microrna.org/microrna/getMrna.do?gene=5229&matureName=hsa-miR-196a*&organism=9606
hsa-miR-196a-3p	MIMAT0004562	hsa-miR-196a*	91608	RASL10B	-0.12	http://www.microrna.org/microrna/getMrna.do?gene=91608&matureName=hsa-miR-196a*&organism=9606
hsa-miR-196a-3p	MIMAT0004562	hsa-miR-196a*	84329	HVCN1	-0.1	http://www.microrna.org/microrna/getMrna.do?gene=84329&matureName=hsa-miR-196a*&organism=9606
hsa-miR-196a-3p	MIMAT0004562	hsa-miR-196a*	3111	HLA-DOA	-0.52	http://www.microrna.org/microrna/getMrna.do?gene=3111&matureName=hsa-miR-196a*&organism=9606
hsa-miR-196a-3p	MIMAT0004562	hsa-miR-196a*	158160	HSD17B7P2	-0.14	http://www.microrna.org/microrna/getMrna.do?gene=158160&matureName=hsa-miR-196a*&organism=9606
hsa-miR-196a-3p	MIMAT0004562	hsa-miR-196a*	89122	TRIM4	-0.78	http://www.microrna.org/microrna/getMrna.do?gene=89122&matureName=hsa-miR-196a*&organism=9606
hsa-miR-196a-3p	MIMAT0004562	hsa-miR-196a*	199870	FAM76A	-0.7	http://www.microrna.org/microrna/getMrna.do?gene=199870&matureName=hsa-miR-196a*&organism=9606
hsa-miR-196a-3p	MIMAT0004562	hsa-miR-196a*	199870	FAM76A	-0.26	http://www.microrna.org/microrna/getMrna.do?gene=199870&matureName=hsa-miR-196a*&organism=9606
hsa-miR-196a-3p	MIMAT0004562	hsa-miR-196a*	92335	STRADA	-0.42	http://www.microrna.org/microrna/getMrna.do?gene=92335&matureName=hsa-miR-196a*&organism=9606
hsa-miR-196a-3p	MIMAT0004562	hsa-miR-196a*	6783	SULT1E1	-0.1	http://www.microrna.org/microrna/getMrna.do?gene=6783&matureName=hsa-miR-196a*&organism=9606
hsa-miR-196a-3p	MIMAT0004562	hsa-miR-196a*	125144	NCRNA00188	-0.25	http://www.microrna.org/microrna/getMrna.do?gene=125144&matureName=hsa-miR-196a*&organism=9606
hsa-miR-196a-3p	MIMAT0004562	hsa-miR-196a*	10060	ABCC9	-0.36	http://www.microrna.org/microrna/getMrna.do?gene=10060&matureName=hsa-miR-196a*&organism=9606
hsa-miR-196a-3p	MIMAT0004562	hsa-miR-196a*	493860	CCDC73	-1.08	http://www.microrna.org/microrna/getMrna.do?gene=493860&matureName=hsa-miR-196a*&organism=9606
hsa-miR-196a-3p	MIMAT0004562	hsa-miR-196a*	79960	PHF17	-0.21	http://www.microrna.org/microrna/getMrna.do?gene=79960&matureName=hsa-miR-196a*&organism=9606
hsa-miR-196a-3p	MIMAT0004562	hsa-miR-196a*	624	BDKRB2	-0.11	http://www.microrna.org/microrna/getMrna.do?gene=624&matureName=hsa-miR-196a*&organism=9606
hsa-miR-196a-3p	MIMAT0004562	hsa-miR-196a*	285626	LOC285626	-0.12	http://www.microrna.org/microrna/getMrna.do?gene=285626&matureName=hsa-miR-196a*&organism=9606
hsa-miR-196a-3p	MIMAT0004562	hsa-miR-196a*	23287	AGTPBP1	-0.66	http://www.microrna.org/microrna/getMrna.do?gene=23287&matureName=hsa-miR-196a*&organism=9606
hsa-miR-196a-3p	MIMAT0004562	hsa-miR-196a*	260294	NSUN5P2	-0.17	http://www.microrna.org/microrna/getMrna.do?gene=260294&matureName=hsa-miR-196a*&organism=9606
hsa-miR-196a-3p	MIMAT0004562	hsa-miR-196a*	79800	ALS2CR8	-1.19	http://www.microrna.org/microrna/getMrna.do?gene=79800&matureName=hsa-miR-196a*&organism=9606
hsa-miR-196a-3p	MIMAT0004562	hsa-miR-196a*	121278	TPH2	-0.87	http://www.microrna.org/microrna/getMrna.do?gene=121278&matureName=hsa-miR-196a*&organism=9606
hsa-miR-196a-3p	MIMAT0004562	hsa-miR-196a*	6941	TCF19	-0.67	http://www.microrna.org/microrna/getMrna.do?gene=6941&matureName=hsa-miR-196a*&organism=9606
hsa-miR-196a-3p	MIMAT0004562	hsa-miR-196a*	117531	TMC1	-0.13	http://www.microrna.org/microrna/getMrna.do?gene=117531&matureName=hsa-miR-196a*&organism=9606
hsa-miR-196a-3p	MIMAT0004562	hsa-miR-196a*	830	CAPZA2	-0.36	http://www.microrna.org/microrna/getMrna.do?gene=830&matureName=hsa-miR-196a*&organism=9606
hsa-miR-196a-3p	MIMAT0004562	hsa-miR-196a*	64863	METTL4	-0.79	http://www.microrna.org/microrna/getMrna.do?gene=64863&matureName=hsa-miR-196a*&organism=9606
hsa-miR-196a-3p	MIMAT0004562	hsa-miR-196a*	100133991	LOC100133991	-0.19	http://www.microrna.org/microrna/getMrna.do?gene=100133991&matureName=hsa-miR-196a*&organism=9606
hsa-miR-196a-3p	MIMAT0004562	hsa-miR-196a*	79969	C6orf134	-0.63	http://www.microrna.org/microrna/getMrna.do?gene=79969&matureName=hsa-miR-196a*&organism=9606
hsa-miR-196a-3p	MIMAT0004562	hsa-miR-196a*	4584	MUC3A	-0.24	http://www.microrna.org/microrna/getMrna.do?gene=4584&matureName=hsa-miR-196a*&organism=9606
hsa-miR-196a-3p	MIMAT0004562	hsa-miR-196a*	29914	UBIAD1	-0.99	http://www.microrna.org/microrna/getMrna.do?gene=29914&matureName=hsa-miR-196a*&organism=9606
hsa-miR-196a-3p	MIMAT0004562	hsa-miR-196a*	9747	FAM115A	-0.23	http://www.microrna.org/microrna/getMrna.do?gene=9747&matureName=hsa-miR-196a*&organism=9606
hsa-miR-196a-3p	MIMAT0004562	hsa-miR-196a*	677843	SNORA77	-0.52	http://www.microrna.org/microrna/getMrna.do?gene=677843&matureName=hsa-miR-196a*&organism=9606
hsa-miR-196a-3p	MIMAT0004562	hsa-miR-196a*	6426	SFRS1	-0.31	http://www.microrna.org/microrna/getMrna.do?gene=6426&matureName=hsa-miR-196a*&organism=9606
hsa-miR-196a-3p	MIMAT0004562	hsa-miR-196a*	100134229	LOC100134229	-0.1	http://www.microrna.org/microrna/getMrna.do?gene=100134229&matureName=hsa-miR-196a*&organism=9606
hsa-miR-196a-3p	MIMAT0004562	hsa-miR-196a*	158219	TTC39B	-1.25	http://www.microrna.org/microrna/getMrna.do?gene=158219&matureName=hsa-miR-196a*&organism=9606
hsa-miR-196a-3p	MIMAT0004562	hsa-miR-196a*	24150	TP53TG3	-0.42	http://www.microrna.org/microrna/getMrna.do?gene=24150&matureName=hsa-miR-196a*&organism=9606
hsa-miR-196a-3p	MIMAT0004562	hsa-miR-196a*	55766	H2AFJ	-0.38	http://www.microrna.org/microrna/getMrna.do?gene=55766&matureName=hsa-miR-196a*&organism=9606
hsa-miR-196a-3p	MIMAT0004562	hsa-miR-196a*	10902	BRD8	-1.07	http://www.microrna.org/microrna/getMrna.do?gene=10902&matureName=hsa-miR-196a*&organism=9606
hsa-miR-196a-3p	MIMAT0004562	hsa-miR-196a*	255631	COL24A1	-1.18	http://www.microrna.org/microrna/getMrna.do?gene=255631&matureName=hsa-miR-196a*&organism=9606
hsa-miR-196a-3p	MIMAT0004562	hsa-miR-196a*	3111	HLA-DOA	-0.52	http://www.microrna.org/microrna/getMrna.do?gene=3111&matureName=hsa-miR-196a*&organism=9606
hsa-miR-196a-3p	MIMAT0004562	hsa-miR-196a*	9110	MTMR4	-0.6	http://www.microrna.org/microrna/getMrna.do?gene=9110&matureName=hsa-miR-196a*&organism=9606
hsa-miR-196a-3p	MIMAT0004562	hsa-miR-196a*	2643	GCH1	-0.69	http://www.microrna.org/microrna/getMrna.do?gene=2643&matureName=hsa-miR-196a*&organism=9606
hsa-miR-196a-3p	MIMAT0004562	hsa-miR-196a*	23405	DICER1	-0.12	http://www.microrna.org/microrna/getMrna.do?gene=23405&matureName=hsa-miR-196a*&organism=9606
hsa-miR-196a-3p	MIMAT0004562	hsa-miR-196a*	140883	ZNF280B	-1.26	http://www.microrna.org/microrna/getMrna.do?gene=140883&matureName=hsa-miR-196a*&organism=9606
hsa-miR-196a-3p	MIMAT0004562	hsa-miR-196a*	125228	C18orf19	-0.76	http://www.microrna.org/microrna/getMrna.do?gene=125228&matureName=hsa-miR-196a*&organism=9606
hsa-miR-196a-3p	MIMAT0004562	hsa-miR-196a*	55776	C6orf64	-0.3	http://www.microrna.org/microrna/getMrna.do?gene=55776&matureName=hsa-miR-196a*&organism=9606
hsa-miR-196a-3p	MIMAT0004562	hsa-miR-196a*	6641	SNTB1	-0.11	http://www.microrna.org/microrna/getMrna.do?gene=6641&matureName=hsa-miR-196a*&organism=9606
hsa-miR-196a-3p	MIMAT0004562	hsa-miR-196a*	2876	GPX1	-0.67	http://www.microrna.org/microrna/getMrna.do?gene=2876&matureName=hsa-miR-196a*&organism=9606
hsa-miR-196a-3p	MIMAT0004562	hsa-miR-196a*	9568	GABBR2	-0.38	http://www.microrna.org/microrna/getMrna.do?gene=9568&matureName=hsa-miR-196a*&organism=9606
hsa-miR-196a-3p	MIMAT0004562	hsa-miR-196a*	54892	NCAPG2	-0.11	http://www.microrna.org/microrna/getMrna.do?gene=54892&matureName=hsa-miR-196a*&organism=9606
hsa-miR-196a-3p	MIMAT0004562	hsa-miR-196a*	54892	NCAPG2	-0.19	http://www.microrna.org/microrna/getMrna.do?gene=54892&matureName=hsa-miR-196a*&organism=9606
hsa-miR-196a-3p	MIMAT0004562	hsa-miR-196a*	81631	MAP1LC3B	-0.13	http://www.microrna.org/microrna/getMrna.do?gene=81631&matureName=hsa-miR-196a*&organism=9606
hsa-miR-196a-3p	MIMAT0004562	hsa-miR-196a*	1743	DLST	-0.21	http://www.microrna.org/microrna/getMrna.do?gene=1743&matureName=hsa-miR-196a*&organism=9606
hsa-miR-196a-3p	MIMAT0004562	hsa-miR-196a*	7329	UBE2I	-0.15	http://www.microrna.org/microrna/getMrna.do?gene=7329&matureName=hsa-miR-196a*&organism=9606
hsa-miR-196a-3p	MIMAT0004562	hsa-miR-196a*	23116	FAM179B	-1.28	http://www.microrna.org/microrna/getMrna.do?gene=23116&matureName=hsa-miR-196a*&organism=9606
hsa-miR-196a-3p	MIMAT0004562	hsa-miR-196a*	8777	MPDZ	-0.12	http://www.microrna.org/microrna/getMrna.do?gene=8777&matureName=hsa-miR-196a*&organism=9606
hsa-miR-196a-3p	MIMAT0004562	hsa-miR-196a*	26133	TRPC4AP	-0.98	http://www.microrna.org/microrna/getMrna.do?gene=26133&matureName=hsa-miR-196a*&organism=9606
hsa-miR-196a-3p	MIMAT0004562	hsa-miR-196a*	146540	ZNF785	-0.19	http://www.microrna.org/microrna/getMrna.do?gene=146540&matureName=hsa-miR-196a*&organism=9606
hsa-miR-196a-3p	MIMAT0004562	hsa-miR-196a*	84750	FUT10	-0.39	http://www.microrna.org/microrna/getMrna.do?gene=84750&matureName=hsa-miR-196a*&organism=9606
hsa-miR-196a-3p	MIMAT0004562	hsa-miR-196a*	84750	FUT10	-0.19	http://www.microrna.org/microrna/getMrna.do?gene=84750&matureName=hsa-miR-196a*&organism=9606
hsa-miR-196a-3p	MIMAT0004562	hsa-miR-196a*	29781	NCAPH2	-0.41	http://www.microrna.org/microrna/getMrna.do?gene=29781&matureName=hsa-miR-196a*&organism=9606
hsa-miR-196a-3p	MIMAT0004562	hsa-miR-196a*	4929	NR4A2	-0.12	http://www.microrna.org/microrna/getMrna.do?gene=4929&matureName=hsa-miR-196a*&organism=9606
hsa-miR-196a-3p	MIMAT0004562	hsa-miR-196a*	4929	NR4A2	-0.2	http://www.microrna.org/microrna/getMrna.do?gene=4929&matureName=hsa-miR-196a*&organism=9606
hsa-miR-196a-3p	MIMAT0004562	hsa-miR-196a*	2354	FOSB	-0.59	http://www.microrna.org/microrna/getMrna.do?gene=2354&matureName=hsa-miR-196a*&organism=9606
hsa-miR-196a-3p	MIMAT0004562	hsa-miR-196a*	79670	ZCCHC6	-0.92	http://www.microrna.org/microrna/getMrna.do?gene=79670&matureName=hsa-miR-196a*&organism=9606
hsa-miR-196a-3p	MIMAT0004562	hsa-miR-196a*	55860	ACTR10	-1.02	http://www.microrna.org/microrna/getMrna.do?gene=55860&matureName=hsa-miR-196a*&organism=9606
hsa-miR-196a-3p	MIMAT0004562	hsa-miR-196a*	55860	ACTR10	-0.12	http://www.microrna.org/microrna/getMrna.do?gene=55860&matureName=hsa-miR-196a*&organism=9606
hsa-miR-196a-3p	MIMAT0004562	hsa-miR-196a*	10250	SRRM1	-0.65	http://www.microrna.org/microrna/getMrna.do?gene=10250&matureName=hsa-miR-196a*&organism=9606
hsa-miR-196a-3p	MIMAT0004562	hsa-miR-196a*	7323	UBE2D3	-0.15	http://www.microrna.org/microrna/getMrna.do?gene=7323&matureName=hsa-miR-196a*&organism=9606
hsa-miR-196a-3p	MIMAT0004562	hsa-miR-196a*	10771	ZMYND11	-0.16	http://www.microrna.org/microrna/getMrna.do?gene=10771&matureName=hsa-miR-196a*&organism=9606
hsa-miR-196a-3p	MIMAT0004562	hsa-miR-196a*	10771	ZMYND11	-0.15	http://www.microrna.org/microrna/getMrna.do?gene=10771&matureName=hsa-miR-196a*&organism=9606
hsa-miR-196a-3p	MIMAT0004562	hsa-miR-196a*	64225	ATL2	-1.2	http://www.microrna.org/microrna/getMrna.do?gene=64225&matureName=hsa-miR-196a*&organism=9606
hsa-miR-196a-3p	MIMAT0004562	hsa-miR-196a*	64225	ATL2	-0.12	http://www.microrna.org/microrna/getMrna.do?gene=64225&matureName=hsa-miR-196a*&organism=9606
hsa-miR-196a-3p	MIMAT0004562	hsa-miR-196a*	56946	C11orf30	-0.37	http://www.microrna.org/microrna/getMrna.do?gene=56946&matureName=hsa-miR-196a*&organism=9606
hsa-miR-196a-3p	MIMAT0004562	hsa-miR-196a*	7062	TCHH	-1.22	http://www.microrna.org/microrna/getMrna.do?gene=7062&matureName=hsa-miR-196a*&organism=9606
hsa-miR-196a-3p	MIMAT0004562	hsa-miR-196a*	7332	UBE2L3	-0.89	http://www.microrna.org/microrna/getMrna.do?gene=7332&matureName=hsa-miR-196a*&organism=9606
hsa-miR-196a-3p	MIMAT0004562	hsa-miR-196a*	989	SEPT7	-0.23	http://www.microrna.org/microrna/getMrna.do?gene=989&matureName=hsa-miR-196a*&organism=9606
hsa-miR-196a-3p	MIMAT0004562	hsa-miR-196a*	5906	RAP1A	-1.06	http://www.microrna.org/microrna/getMrna.do?gene=5906&matureName=hsa-miR-196a*&organism=9606
hsa-miR-196a-3p	MIMAT0004562	hsa-miR-196a*	51439	FAM8A1	-0.38	http://www.microrna.org/microrna/getMrna.do?gene=51439&matureName=hsa-miR-196a*&organism=9606
hsa-miR-196a-3p	MIMAT0004562	hsa-miR-196a*	26469	PTPN18	-0.2	http://www.microrna.org/microrna/getMrna.do?gene=26469&matureName=hsa-miR-196a*&organism=9606
hsa-miR-196a-3p	MIMAT0004562	hsa-miR-196a*	2119	ETV5	-0.12	http://www.microrna.org/microrna/getMrna.do?gene=2119&matureName=hsa-miR-196a*&organism=9606
hsa-miR-196a-3p	MIMAT0004562	hsa-miR-196a*	85301	COL27A1	-0.78	http://www.microrna.org/microrna/getMrna.do?gene=85301&matureName=hsa-miR-196a*&organism=9606
hsa-miR-196a-3p	MIMAT0004562	hsa-miR-196a*	285025	CCDC141	-0.96	http://www.microrna.org/microrna/getMrna.do?gene=285025&matureName=hsa-miR-196a*&organism=9606
hsa-miR-196a-3p	MIMAT0004562	hsa-miR-196a*	113201	CASC4	-0.37	http://www.microrna.org/microrna/getMrna.do?gene=113201&matureName=hsa-miR-196a*&organism=9606
hsa-miR-196a-3p	MIMAT0004562	hsa-miR-196a*	282973	JAKMIP3	-0.23	http://www.microrna.org/microrna/getMrna.do?gene=282973&matureName=hsa-miR-196a*&organism=9606
hsa-miR-196a-3p	MIMAT0004562	hsa-miR-196a*	25870	SUMF2	-0.15	http://www.microrna.org/microrna/getMrna.do?gene=25870&matureName=hsa-miR-196a*&organism=9606
hsa-miR-196a-3p	MIMAT0004562	hsa-miR-196a*	9722	NOS1AP	-0.37	http://www.microrna.org/microrna/getMrna.do?gene=9722&matureName=hsa-miR-196a*&organism=9606
hsa-miR-196a-3p	MIMAT0004562	hsa-miR-196a*	2845	GPR22	-0.11	http://www.microrna.org/microrna/getMrna.do?gene=2845&matureName=hsa-miR-196a*&organism=9606
hsa-miR-196a-3p	MIMAT0004562	hsa-miR-196a*	388591	RNF207	-0.18	http://www.microrna.org/microrna/getMrna.do?gene=388591&matureName=hsa-miR-196a*&organism=9606
hsa-miR-196a-3p	MIMAT0004562	hsa-miR-196a*	2968	GTF2H4	-0.21	http://www.microrna.org/microrna/getMrna.do?gene=2968&matureName=hsa-miR-196a*&organism=9606
hsa-miR-196a-3p	MIMAT0004562	hsa-miR-196a*	118788	PIK3AP1	-0.98	http://www.microrna.org/microrna/getMrna.do?gene=118788&matureName=hsa-miR-196a*&organism=9606
hsa-miR-196a-3p	MIMAT0004562	hsa-miR-196a*	8575	PRKRA	-1.18	http://www.microrna.org/microrna/getMrna.do?gene=8575&matureName=hsa-miR-196a*&organism=9606
hsa-miR-196a-3p	MIMAT0004562	hsa-miR-196a*	55252	ASXL2	-0.15	http://www.microrna.org/microrna/getMrna.do?gene=55252&matureName=hsa-miR-196a*&organism=9606
hsa-miR-196a-3p	MIMAT0004562	hsa-miR-196a*	91368	CDKN2AIPNL	-0.15	http://www.microrna.org/microrna/getMrna.do?gene=91368&matureName=hsa-miR-196a*&organism=9606
hsa-miR-196a-3p	MIMAT0004562	hsa-miR-196a*	84068	SLC10A7	-0.89	http://www.microrna.org/microrna/getMrna.do?gene=84068&matureName=hsa-miR-196a*&organism=9606
hsa-miR-196a-3p	MIMAT0004562	hsa-miR-196a*	162239	ZFP1	-0.55	http://www.microrna.org/microrna/getMrna.do?gene=162239&matureName=hsa-miR-196a*&organism=9606
hsa-miR-196a-3p	MIMAT0004562	hsa-miR-196a*	3745	KCNB1	-0.28	http://www.microrna.org/microrna/getMrna.do?gene=3745&matureName=hsa-miR-196a*&organism=9606
hsa-miR-196a-3p	MIMAT0004562	hsa-miR-196a*	56907	SPIRE1	-1.11	http://www.microrna.org/microrna/getMrna.do?gene=56907&matureName=hsa-miR-196a*&organism=9606
hsa-miR-196a-3p	MIMAT0004562	hsa-miR-196a*	11170	FAM107A	-0.24	http://www.microrna.org/microrna/getMrna.do?gene=11170&matureName=hsa-miR-196a*&organism=9606
hsa-miR-196a-3p	MIMAT0004562	hsa-miR-196a*	27239	GPR162	-0.6	http://www.microrna.org/microrna/getMrna.do?gene=27239&matureName=hsa-miR-196a*&organism=9606
hsa-miR-196a-3p	MIMAT0004562	hsa-miR-196a*	79956	ERMP1	-0.85	http://www.microrna.org/microrna/getMrna.do?gene=79956&matureName=hsa-miR-196a*&organism=9606
hsa-miR-196a-3p	MIMAT0004562	hsa-miR-196a*	3560	IL2RB	-0.18	http://www.microrna.org/microrna/getMrna.do?gene=3560&matureName=hsa-miR-196a*&organism=9606
hsa-miR-196a-3p	MIMAT0004562	hsa-miR-196a*	442213	C6orf138	-0.16	http://www.microrna.org/microrna/getMrna.do?gene=442213&matureName=hsa-miR-196a*&organism=9606
hsa-miR-196a-3p	MIMAT0004562	hsa-miR-196a*	10611	PDLIM5	-0.24	http://www.microrna.org/microrna/getMrna.do?gene=10611&matureName=hsa-miR-196a*&organism=9606
hsa-miR-196a-3p	MIMAT0004562	hsa-miR-196a*	7003	TEAD1	-0.32	http://www.microrna.org/microrna/getMrna.do?gene=7003&matureName=hsa-miR-196a*&organism=9606
hsa-miR-196a-3p	MIMAT0004562	hsa-miR-196a*	55088	C10orf118	-0.28	http://www.microrna.org/microrna/getMrna.do?gene=55088&matureName=hsa-miR-196a*&organism=9606
hsa-miR-196a-3p	MIMAT0004562	hsa-miR-196a*	10007	GNPDA1	-0.94	http://www.microrna.org/microrna/getMrna.do?gene=10007&matureName=hsa-miR-196a*&organism=9606
hsa-miR-196a-3p	MIMAT0004562	hsa-miR-196a*	9778	KIAA0232	-0.62	http://www.microrna.org/microrna/getMrna.do?gene=9778&matureName=hsa-miR-196a*&organism=9606
hsa-miR-196a-3p	MIMAT0004562	hsa-miR-196a*	2705	GJB1	-0.16	http://www.microrna.org/microrna/getMrna.do?gene=2705&matureName=hsa-miR-196a*&organism=9606
hsa-miR-196a-3p	MIMAT0004562	hsa-miR-196a*	84631	SLITRK2	-0.32	http://www.microrna.org/microrna/getMrna.do?gene=84631&matureName=hsa-miR-196a*&organism=9606
hsa-miR-196a-3p	MIMAT0004562	hsa-miR-196a*	9477	MED20	-0.19	http://www.microrna.org/microrna/getMrna.do?gene=9477&matureName=hsa-miR-196a*&organism=9606
hsa-miR-196a-3p	MIMAT0004562	hsa-miR-196a*	64225	ATL2	-0.12	http://www.microrna.org/microrna/getMrna.do?gene=64225&matureName=hsa-miR-196a*&organism=9606
hsa-miR-196a-3p	MIMAT0004562	hsa-miR-196a*	64225	ATL2	-1.14	http://www.microrna.org/microrna/getMrna.do?gene=64225&matureName=hsa-miR-196a*&organism=9606
hsa-miR-196a-3p	MIMAT0004562	hsa-miR-196a*	23199	KIAA0182	-0.18	http://www.microrna.org/microrna/getMrna.do?gene=23199&matureName=hsa-miR-196a*&organism=9606
hsa-miR-196a-3p	MIMAT0004562	hsa-miR-196a*	5495	PPM1B	-0.97	http://www.microrna.org/microrna/getMrna.do?gene=5495&matureName=hsa-miR-196a*&organism=9606
hsa-miR-196a-3p	MIMAT0004562	hsa-miR-196a*	10816	SPINT3	-0.18	http://www.microrna.org/microrna/getMrna.do?gene=10816&matureName=hsa-miR-196a*&organism=9606
hsa-miR-196a-3p	MIMAT0004562	hsa-miR-196a*	55193	PBRM1	-1.1	http://www.microrna.org/microrna/getMrna.do?gene=55193&matureName=hsa-miR-196a*&organism=9606
hsa-miR-196a-3p	MIMAT0004562	hsa-miR-196a*	54149	C21orf91	-0.6	http://www.microrna.org/microrna/getMrna.do?gene=54149&matureName=hsa-miR-196a*&organism=9606
hsa-miR-196a-3p	MIMAT0004562	hsa-miR-196a*	4046	LSP1	-0.23	http://www.microrna.org/microrna/getMrna.do?gene=4046&matureName=hsa-miR-196a*&organism=9606
hsa-miR-196a-3p	MIMAT0004562	hsa-miR-196a*	23300	ATMIN	-0.68	http://www.microrna.org/microrna/getMrna.do?gene=23300&matureName=hsa-miR-196a*&organism=9606
hsa-miR-196a-3p	MIMAT0004562	hsa-miR-196a*	5277	PIGA	-0.34	http://www.microrna.org/microrna/getMrna.do?gene=5277&matureName=hsa-miR-196a*&organism=9606
hsa-miR-196a-3p	MIMAT0004562	hsa-miR-196a*	57584	ARHGAP21	-0.13	http://www.microrna.org/microrna/getMrna.do?gene=57584&matureName=hsa-miR-196a*&organism=9606
hsa-miR-196a-3p	MIMAT0004562	hsa-miR-196a*	168667	BMPER	-0.87	http://www.microrna.org/microrna/getMrna.do?gene=168667&matureName=hsa-miR-196a*&organism=9606
hsa-miR-196a-3p	MIMAT0004562	hsa-miR-196a*	168667	BMPER	-0.12	http://www.microrna.org/microrna/getMrna.do?gene=168667&matureName=hsa-miR-196a*&organism=9606
hsa-miR-196a-3p	MIMAT0004562	hsa-miR-196a*	56658	TRIM39	-1.03	http://www.microrna.org/microrna/getMrna.do?gene=56658&matureName=hsa-miR-196a*&organism=9606
hsa-miR-196a-3p	MIMAT0004562	hsa-miR-196a*	212	ALAS2	-0.81	http://www.microrna.org/microrna/getMrna.do?gene=212&matureName=hsa-miR-196a*&organism=9606
hsa-miR-196a-3p	MIMAT0004562	hsa-miR-196a*	80025	PANK2	-0.19	http://www.microrna.org/microrna/getMrna.do?gene=80025&matureName=hsa-miR-196a*&organism=9606
hsa-miR-196a-3p	MIMAT0004562	hsa-miR-196a*	1996	ELAVL4	-1.21	http://www.microrna.org/microrna/getMrna.do?gene=1996&matureName=hsa-miR-196a*&organism=9606
hsa-miR-196a-3p	MIMAT0004562	hsa-miR-196a*	1996	ELAVL4	-1.08	http://www.microrna.org/microrna/getMrna.do?gene=1996&matureName=hsa-miR-196a*&organism=9606
hsa-miR-196a-3p	MIMAT0004562	hsa-miR-196a*	257415	FAM133B	-0.59	http://www.microrna.org/microrna/getMrna.do?gene=257415&matureName=hsa-miR-196a*&organism=9606
hsa-miR-196a-3p	MIMAT0004562	hsa-miR-196a*	257415	FAM133B	-0.1	http://www.microrna.org/microrna/getMrna.do?gene=257415&matureName=hsa-miR-196a*&organism=9606
hsa-miR-196a-3p	MIMAT0004562	hsa-miR-196a*	7130	TNFAIP6	-0.38	http://www.microrna.org/microrna/getMrna.do?gene=7130&matureName=hsa-miR-196a*&organism=9606
hsa-miR-196a-3p	MIMAT0004562	hsa-miR-196a*	10438	C1D	-0.95	http://www.microrna.org/microrna/getMrna.do?gene=10438&matureName=hsa-miR-196a*&organism=9606
hsa-miR-196a-3p	MIMAT0004562	hsa-miR-196a*	9374	PPT2	-0.22	http://www.microrna.org/microrna/getMrna.do?gene=9374&matureName=hsa-miR-196a*&organism=9606
hsa-miR-196a-3p	MIMAT0004562	hsa-miR-196a*	80177	MYCT1	-0.34	http://www.microrna.org/microrna/getMrna.do?gene=80177&matureName=hsa-miR-196a*&organism=9606
hsa-miR-196a-3p	MIMAT0004562	hsa-miR-196a*	3429	IFI27	-0.16	http://www.microrna.org/microrna/getMrna.do?gene=3429&matureName=hsa-miR-196a*&organism=9606
hsa-miR-196a-3p	MIMAT0004562	hsa-miR-196a*	10114	HIPK3	-0.24	http://www.microrna.org/microrna/getMrna.do?gene=10114&matureName=hsa-miR-196a*&organism=9606
hsa-miR-196a-3p	MIMAT0004562	hsa-miR-196a*	55726	C12orf11	-1.15	http://www.microrna.org/microrna/getMrna.do?gene=55726&matureName=hsa-miR-196a*&organism=9606
hsa-miR-196a-3p	MIMAT0004562	hsa-miR-196a*	8754	ADAM9	-0.11	http://www.microrna.org/microrna/getMrna.do?gene=8754&matureName=hsa-miR-196a*&organism=9606
hsa-miR-196a-3p	MIMAT0004562	hsa-miR-196a*	54471	SMCR7L	-0.27	http://www.microrna.org/microrna/getMrna.do?gene=54471&matureName=hsa-miR-196a*&organism=9606
hsa-miR-196a-3p	MIMAT0004562	hsa-miR-196a*	317	APAF1	-0.15	http://www.microrna.org/microrna/getMrna.do?gene=317&matureName=hsa-miR-196a*&organism=9606
hsa-miR-196a-3p	MIMAT0004562	hsa-miR-196a*	2559	GABRA6	-0.21	http://www.microrna.org/microrna/getMrna.do?gene=2559&matureName=hsa-miR-196a*&organism=9606
hsa-miR-196a-3p	MIMAT0004562	hsa-miR-196a*	58517	RBM25	-0.85	http://www.microrna.org/microrna/getMrna.do?gene=58517&matureName=hsa-miR-196a*&organism=9606
hsa-miR-196a-3p	MIMAT0004562	hsa-miR-196a*	93986	FOXP2	-0.32	http://www.microrna.org/microrna/getMrna.do?gene=93986&matureName=hsa-miR-196a*&organism=9606
hsa-miR-196a-3p	MIMAT0004562	hsa-miR-196a*	92912	UBE2Q2	-0.1	http://www.microrna.org/microrna/getMrna.do?gene=92912&matureName=hsa-miR-196a*&organism=9606
hsa-miR-196a-3p	MIMAT0004562	hsa-miR-196a*	9928	KIF14	-1.19	http://www.microrna.org/microrna/getMrna.do?gene=9928&matureName=hsa-miR-196a*&organism=9606
hsa-miR-196a-3p	MIMAT0004562	hsa-miR-196a*	51111	SUV420H1	-0.17	http://www.microrna.org/microrna/getMrna.do?gene=51111&matureName=hsa-miR-196a*&organism=9606
hsa-miR-196a-3p	MIMAT0004562	hsa-miR-196a*	9924	PAN2	-0.62	http://www.microrna.org/microrna/getMrna.do?gene=9924&matureName=hsa-miR-196a*&organism=9606
hsa-miR-196a-3p	MIMAT0004562	hsa-miR-196a*	100133612	LOC100133612	-0.79	http://www.microrna.org/microrna/getMrna.do?gene=100133612&matureName=hsa-miR-196a*&organism=9606
hsa-miR-196a-3p	MIMAT0004562	hsa-miR-196a*	100131187	TSTD1	-0.16	http://www.microrna.org/microrna/getMrna.do?gene=100131187&matureName=hsa-miR-196a*&organism=9606
hsa-miR-196a-3p	MIMAT0004562	hsa-miR-196a*	205	AK3L1	-0.26	http://www.microrna.org/microrna/getMrna.do?gene=205&matureName=hsa-miR-196a*&organism=9606
hsa-miR-196a-3p	MIMAT0004562	hsa-miR-196a*	7103	TSPAN8	-0.17	http://www.microrna.org/microrna/getMrna.do?gene=7103&matureName=hsa-miR-196a*&organism=9606
hsa-miR-196a-3p	MIMAT0004562	hsa-miR-196a*	10142	AKAP9	-0.1	http://www.microrna.org/microrna/getMrna.do?gene=10142&matureName=hsa-miR-196a*&organism=9606
hsa-miR-196a-3p	MIMAT0004562	hsa-miR-196a*	10981	RAB32	-1.22	http://www.microrna.org/microrna/getMrna.do?gene=10981&matureName=hsa-miR-196a*&organism=9606
hsa-miR-196a-3p	MIMAT0004562	hsa-miR-196a*	10336	PCGF3	-0.58	http://www.microrna.org/microrna/getMrna.do?gene=10336&matureName=hsa-miR-196a*&organism=9606
hsa-miR-196a-3p	MIMAT0004562	hsa-miR-196a*	54914	KIAA1797	-0.42	http://www.microrna.org/microrna/getMrna.do?gene=54914&matureName=hsa-miR-196a*&organism=9606
hsa-miR-196a-3p	MIMAT0004562	hsa-miR-196a*	1463	NCAN	-0.1	http://www.microrna.org/microrna/getMrna.do?gene=1463&matureName=hsa-miR-196a*&organism=9606
hsa-miR-196a-3p	MIMAT0004562	hsa-miR-196a*	5162	PDHB	-0.13	http://www.microrna.org/microrna/getMrna.do?gene=5162&matureName=hsa-miR-196a*&organism=9606
hsa-miR-196a-3p	MIMAT0004562	hsa-miR-196a*	9807	IP6K1	-0.21	http://www.microrna.org/microrna/getMrna.do?gene=9807&matureName=hsa-miR-196a*&organism=9606
hsa-miR-196a-3p	MIMAT0004562	hsa-miR-196a*	27443	CECR2	-1.26	http://www.microrna.org/microrna/getMrna.do?gene=27443&matureName=hsa-miR-196a*&organism=9606
hsa-miR-196a-3p	MIMAT0004562	hsa-miR-196a*	375484	C5orf25	-0.52	http://www.microrna.org/microrna/getMrna.do?gene=375484&matureName=hsa-miR-196a*&organism=9606
hsa-miR-196a-3p	MIMAT0004562	hsa-miR-196a*	5908	RAP1B	-0.38	http://www.microrna.org/microrna/getMrna.do?gene=5908&matureName=hsa-miR-196a*&organism=9606
hsa-miR-196a-3p	MIMAT0004562	hsa-miR-196a*	5908	RAP1B	-0.16	http://www.microrna.org/microrna/getMrna.do?gene=5908&matureName=hsa-miR-196a*&organism=9606
hsa-miR-196a-3p	MIMAT0004562	hsa-miR-196a*	574029	DUSP5P	-0.17	http://www.microrna.org/microrna/getMrna.do?gene=574029&matureName=hsa-miR-196a*&organism=9606
hsa-miR-196a-3p	MIMAT0004562	hsa-miR-196a*	150696	PROM2	-0.41	http://www.microrna.org/microrna/getMrna.do?gene=150696&matureName=hsa-miR-196a*&organism=9606
hsa-miR-196a-3p	MIMAT0004562	hsa-miR-196a*	343450	KCNT2	-1.23	http://www.microrna.org/microrna/getMrna.do?gene=343450&matureName=hsa-miR-196a*&organism=9606
hsa-miR-196a-3p	MIMAT0004562	hsa-miR-196a*	824	CAPN2	-0.8	http://www.microrna.org/microrna/getMrna.do?gene=824&matureName=hsa-miR-196a*&organism=9606
hsa-miR-196a-3p	MIMAT0004562	hsa-miR-196a*	4656	MYOG	-0.21	http://www.microrna.org/microrna/getMrna.do?gene=4656&matureName=hsa-miR-196a*&organism=9606
hsa-miR-196a-3p	MIMAT0004562	hsa-miR-196a*	204851	HIPK1	-0.28	http://www.microrna.org/microrna/getMrna.do?gene=204851&matureName=hsa-miR-196a*&organism=9606
hsa-miR-196a-3p	MIMAT0004562	hsa-miR-196a*	56950	SMYD2	-0.14	http://www.microrna.org/microrna/getMrna.do?gene=56950&matureName=hsa-miR-196a*&organism=9606
hsa-miR-196a-3p	MIMAT0004562	hsa-miR-196a*	11062	DUS4L	-0.68	http://www.microrna.org/microrna/getMrna.do?gene=11062&matureName=hsa-miR-196a*&organism=9606
hsa-miR-196a-3p	MIMAT0004562	hsa-miR-196a*	4841	NONO	-0.24	http://www.microrna.org/microrna/getMrna.do?gene=4841&matureName=hsa-miR-196a*&organism=9606
hsa-miR-196a-3p	MIMAT0004562	hsa-miR-196a*	8732	RNGTT	-0.16	http://www.microrna.org/microrna/getMrna.do?gene=8732&matureName=hsa-miR-196a*&organism=9606
hsa-miR-196a-3p	MIMAT0004562	hsa-miR-196a*	8732	RNGTT	-1.03	http://www.microrna.org/microrna/getMrna.do?gene=8732&matureName=hsa-miR-196a*&organism=9606
hsa-miR-196a-3p	MIMAT0004562	hsa-miR-196a*	3708	ITPR1	-0.9	http://www.microrna.org/microrna/getMrna.do?gene=3708&matureName=hsa-miR-196a*&organism=9606
hsa-miR-196a-3p	MIMAT0004562	hsa-miR-196a*	26353	HSPB8	-0.15	http://www.microrna.org/microrna/getMrna.do?gene=26353&matureName=hsa-miR-196a*&organism=9606
hsa-miR-196a-3p	MIMAT0004562	hsa-miR-196a*	10152	ABI2	-0.13	http://www.microrna.org/microrna/getMrna.do?gene=10152&matureName=hsa-miR-196a*&organism=9606
hsa-miR-196a-3p	MIMAT0004562	hsa-miR-196a*	10152	ABI2	-0.29	http://www.microrna.org/microrna/getMrna.do?gene=10152&matureName=hsa-miR-196a*&organism=9606
hsa-miR-196a-3p	MIMAT0004562	hsa-miR-196a*	10152	ABI2	-0.34	http://www.microrna.org/microrna/getMrna.do?gene=10152&matureName=hsa-miR-196a*&organism=9606
hsa-miR-196a-3p	MIMAT0004562	hsa-miR-196a*	51172	NAGPA	-0.1	http://www.microrna.org/microrna/getMrna.do?gene=51172&matureName=hsa-miR-196a*&organism=9606
hsa-miR-196a-3p	MIMAT0004562	hsa-miR-196a*	55364	IMPACT	-0.1	http://www.microrna.org/microrna/getMrna.do?gene=55364&matureName=hsa-miR-196a*&organism=9606
hsa-miR-196a-3p	MIMAT0004562	hsa-miR-196a*	83875	BCO2	-0.21	http://www.microrna.org/microrna/getMrna.do?gene=83875&matureName=hsa-miR-196a*&organism=9606
hsa-miR-196a-3p	MIMAT0004562	hsa-miR-196a*	266977	GPR110	-0.29	http://www.microrna.org/microrna/getMrna.do?gene=266977&matureName=hsa-miR-196a*&organism=9606
hsa-miR-196a-3p	MIMAT0004562	hsa-miR-196a*	339524	LOC339524	-0.17	http://www.microrna.org/microrna/getMrna.do?gene=339524&matureName=hsa-miR-196a*&organism=9606
hsa-miR-196a-3p	MIMAT0004562	hsa-miR-196a*	114898	C1QTNF2	-0.21	http://www.microrna.org/microrna/getMrna.do?gene=114898&matureName=hsa-miR-196a*&organism=9606
hsa-miR-196a-3p	MIMAT0004562	hsa-miR-196a*	56648	EIF5A2	-0.27	http://www.microrna.org/microrna/getMrna.do?gene=56648&matureName=hsa-miR-196a*&organism=9606
hsa-miR-196a-3p	MIMAT0004562	hsa-miR-196a*	994	CDC25B	-0.25	http://www.microrna.org/microrna/getMrna.do?gene=994&matureName=hsa-miR-196a*&organism=9606
hsa-miR-196a-3p	MIMAT0004562	hsa-miR-196a*	994	CDC25B	-0.18	http://www.microrna.org/microrna/getMrna.do?gene=994&matureName=hsa-miR-196a*&organism=9606
hsa-miR-196a-3p	MIMAT0004562	hsa-miR-196a*	51009	DERL2	-0.14	http://www.microrna.org/microrna/getMrna.do?gene=51009&matureName=hsa-miR-196a*&organism=9606
hsa-miR-196a-3p	MIMAT0004562	hsa-miR-196a*	80205	CHD9	-0.67	http://www.microrna.org/microrna/getMrna.do?gene=80205&matureName=hsa-miR-196a*&organism=9606
hsa-miR-196a-3p	MIMAT0004562	hsa-miR-196a*	22978	NT5C2	-0.22	http://www.microrna.org/microrna/getMrna.do?gene=22978&matureName=hsa-miR-196a*&organism=9606
hsa-miR-196a-3p	MIMAT0004562	hsa-miR-196a*	51520	LARS	-0.1	http://www.microrna.org/microrna/getMrna.do?gene=51520&matureName=hsa-miR-196a*&organism=9606
hsa-miR-196a-3p	MIMAT0004562	hsa-miR-196a*	22854	NTNG1	-0.2	http://www.microrna.org/microrna/getMrna.do?gene=22854&matureName=hsa-miR-196a*&organism=9606
hsa-miR-196a-3p	MIMAT0004562	hsa-miR-196a*	1998	ELF2	-0.12	http://www.microrna.org/microrna/getMrna.do?gene=1998&matureName=hsa-miR-196a*&organism=9606
hsa-miR-196a-3p	MIMAT0004562	hsa-miR-196a*	23287	AGTPBP1	-0.68	http://www.microrna.org/microrna/getMrna.do?gene=23287&matureName=hsa-miR-196a*&organism=9606
hsa-miR-196a-3p	MIMAT0004562	hsa-miR-196a*	157922	CAMSAP1	-0.6	http://www.microrna.org/microrna/getMrna.do?gene=157922&matureName=hsa-miR-196a*&organism=9606
hsa-miR-196a-3p	MIMAT0004562	hsa-miR-196a*	1945	EFNA4	-0.96	http://www.microrna.org/microrna/getMrna.do?gene=1945&matureName=hsa-miR-196a*&organism=9606
hsa-miR-196a-3p	MIMAT0004562	hsa-miR-196a*	347735	SERINC2	-0.17	http://www.microrna.org/microrna/getMrna.do?gene=347735&matureName=hsa-miR-196a*&organism=9606
hsa-miR-196a-3p	MIMAT0004562	hsa-miR-196a*	27349	MCAT	-0.72	http://www.microrna.org/microrna/getMrna.do?gene=27349&matureName=hsa-miR-196a*&organism=9606
hsa-miR-196a-3p	MIMAT0004562	hsa-miR-196a*	9419	CRIPT	-0.91	http://www.microrna.org/microrna/getMrna.do?gene=9419&matureName=hsa-miR-196a*&organism=9606
hsa-miR-196a-3p	MIMAT0004562	hsa-miR-196a*	9419	CRIPT	-0.41	http://www.microrna.org/microrna/getMrna.do?gene=9419&matureName=hsa-miR-196a*&organism=9606
hsa-miR-196a-3p	MIMAT0004562	hsa-miR-196a*	55108	BSDC1	-0.1	http://www.microrna.org/microrna/getMrna.do?gene=55108&matureName=hsa-miR-196a*&organism=9606
hsa-miR-196a-3p	MIMAT0004562	hsa-miR-196a*	5775	PTPN4	-0.15	http://www.microrna.org/microrna/getMrna.do?gene=5775&matureName=hsa-miR-196a*&organism=9606
hsa-miR-196a-3p	MIMAT0004562	hsa-miR-196a*	55610	CCDC132	-0.13	http://www.microrna.org/microrna/getMrna.do?gene=55610&matureName=hsa-miR-196a*&organism=9606
hsa-miR-196a-3p	MIMAT0004562	hsa-miR-196a*	5869	RAB5B	-0.19	http://www.microrna.org/microrna/getMrna.do?gene=5869&matureName=hsa-miR-196a*&organism=9606
hsa-miR-196a-3p	MIMAT0004562	hsa-miR-196a*	1503	CTPS	-0.77	http://www.microrna.org/microrna/getMrna.do?gene=1503&matureName=hsa-miR-196a*&organism=9606
hsa-miR-196a-3p	MIMAT0004562	hsa-miR-196a*	5334	PLCL1	-0.12	http://www.microrna.org/microrna/getMrna.do?gene=5334&matureName=hsa-miR-196a*&organism=9606
hsa-miR-196a-3p	MIMAT0004562	hsa-miR-196a*	7170	TPM3	-0.17	http://www.microrna.org/microrna/getMrna.do?gene=7170&matureName=hsa-miR-196a*&organism=9606
hsa-miR-196a-3p	MIMAT0004562	hsa-miR-196a*	2742	GLRA2	-0.1	http://www.microrna.org/microrna/getMrna.do?gene=2742&matureName=hsa-miR-196a*&organism=9606
hsa-miR-196a-3p	MIMAT0004562	hsa-miR-196a*	7348	UPK1B	-0.75	http://www.microrna.org/microrna/getMrna.do?gene=7348&matureName=hsa-miR-196a*&organism=9606
hsa-miR-196a-3p	MIMAT0004562	hsa-miR-196a*	27122	DKK3	-0.64	http://www.microrna.org/microrna/getMrna.do?gene=27122&matureName=hsa-miR-196a*&organism=9606
hsa-miR-196a-3p	MIMAT0004562	hsa-miR-196a*	11159	RABL2A	-0.26	http://www.microrna.org/microrna/getMrna.do?gene=11159&matureName=hsa-miR-196a*&organism=9606
hsa-miR-196a-3p	MIMAT0004562	hsa-miR-196a*	6357	CCL13	-0.11	http://www.microrna.org/microrna/getMrna.do?gene=6357&matureName=hsa-miR-196a*&organism=9606
hsa-miR-196a-3p	MIMAT0004562	hsa-miR-196a*	91050	CCDC149	-0.1	http://www.microrna.org/microrna/getMrna.do?gene=91050&matureName=hsa-miR-196a*&organism=9606
hsa-miR-196a-3p	MIMAT0004562	hsa-miR-196a*	1486	CTBS	-0.14	http://www.microrna.org/microrna/getMrna.do?gene=1486&matureName=hsa-miR-196a*&organism=9606
hsa-miR-196a-3p	MIMAT0004562	hsa-miR-196a*	54890	ALKBH5	-0.54	http://www.microrna.org/microrna/getMrna.do?gene=54890&matureName=hsa-miR-196a*&organism=9606
hsa-miR-196a-3p	MIMAT0004562	hsa-miR-196a*	92340	C17orf72	-0.44	http://www.microrna.org/microrna/getMrna.do?gene=92340&matureName=hsa-miR-196a*&organism=9606
hsa-miR-196a-3p	MIMAT0004562	hsa-miR-196a*	947	CD34	-0.45	http://www.microrna.org/microrna/getMrna.do?gene=947&matureName=hsa-miR-196a*&organism=9606
hsa-miR-196a-3p	MIMAT0004562	hsa-miR-196a*	3070	HELLS	-1.09	http://www.microrna.org/microrna/getMrna.do?gene=3070&matureName=hsa-miR-196a*&organism=9606
hsa-miR-196a-3p	MIMAT0004562	hsa-miR-196a*	3423	IDS	-0.67	http://www.microrna.org/microrna/getMrna.do?gene=3423&matureName=hsa-miR-196a*&organism=9606
hsa-miR-196a-3p	MIMAT0004562	hsa-miR-196a*	57553	MICAL3	-0.18	http://www.microrna.org/microrna/getMrna.do?gene=57553&matureName=hsa-miR-196a*&organism=9606
hsa-miR-196a-3p	MIMAT0004562	hsa-miR-196a*	7091	TLE4	-0.23	http://www.microrna.org/microrna/getMrna.do?gene=7091&matureName=hsa-miR-196a*&organism=9606
hsa-miR-196a-3p	MIMAT0004562	hsa-miR-196a*	5505	PPP1R2P1	-0.11	http://www.microrna.org/microrna/getMrna.do?gene=5505&matureName=hsa-miR-196a*&organism=9606
hsa-miR-196a-3p	MIMAT0004562	hsa-miR-196a*	8824	CES2	-0.45	http://www.microrna.org/microrna/getMrna.do?gene=8824&matureName=hsa-miR-196a*&organism=9606
hsa-miR-196a-3p	MIMAT0004562	hsa-miR-196a*	57508	INTS2	-0.16	http://www.microrna.org/microrna/getMrna.do?gene=57508&matureName=hsa-miR-196a*&organism=9606
hsa-miR-196a-3p	MIMAT0004562	hsa-miR-196a*	55588	MED29	-0.17	http://www.microrna.org/microrna/getMrna.do?gene=55588&matureName=hsa-miR-196a*&organism=9606
hsa-miR-196a-3p	MIMAT0004562	hsa-miR-196a*	22841	RAB11FIP2	-0.73	http://www.microrna.org/microrna/getMrna.do?gene=22841&matureName=hsa-miR-196a*&organism=9606
hsa-miR-196a-3p	MIMAT0004562	hsa-miR-196a*	84276	NICN1	-0.1	http://www.microrna.org/microrna/getMrna.do?gene=84276&matureName=hsa-miR-196a*&organism=9606
hsa-miR-196a-3p	MIMAT0004562	hsa-miR-196a*	84276	NICN1	-0.27	http://www.microrna.org/microrna/getMrna.do?gene=84276&matureName=hsa-miR-196a*&organism=9606
hsa-miR-196a-3p	MIMAT0004562	hsa-miR-196a*	84276	NICN1	-0.19	http://www.microrna.org/microrna/getMrna.do?gene=84276&matureName=hsa-miR-196a*&organism=9606
hsa-miR-196a-3p	MIMAT0004562	hsa-miR-196a*	92399	MRRF	-0.76	http://www.microrna.org/microrna/getMrna.do?gene=92399&matureName=hsa-miR-196a*&organism=9606
hsa-miR-196a-3p	MIMAT0004562	hsa-miR-196a*	399669	ZNF321	-0.99	http://www.microrna.org/microrna/getMrna.do?gene=399669&matureName=hsa-miR-196a*&organism=9606
hsa-miR-196a-3p	MIMAT0004562	hsa-miR-196a*	399669	ZNF321	-0.26	http://www.microrna.org/microrna/getMrna.do?gene=399669&matureName=hsa-miR-196a*&organism=9606
hsa-miR-196a-3p	MIMAT0004562	hsa-miR-196a*	23161	SNX13	-0.12	http://www.microrna.org/microrna/getMrna.do?gene=23161&matureName=hsa-miR-196a*&organism=9606
hsa-miR-196a-3p	MIMAT0004562	hsa-miR-196a*	27430	MAT2B	-0.64	http://www.microrna.org/microrna/getMrna.do?gene=27430&matureName=hsa-miR-196a*&organism=9606
hsa-miR-196a-3p	MIMAT0004562	hsa-miR-196a*	27430	MAT2B	-0.16	http://www.microrna.org/microrna/getMrna.do?gene=27430&matureName=hsa-miR-196a*&organism=9606
hsa-miR-196a-3p	MIMAT0004562	hsa-miR-196a*	7092	TLL1	-0.75	http://www.microrna.org/microrna/getMrna.do?gene=7092&matureName=hsa-miR-196a*&organism=9606
hsa-miR-196a-3p	MIMAT0004562	hsa-miR-196a*	55207	ARL8B	-0.31	http://www.microrna.org/microrna/getMrna.do?gene=55207&matureName=hsa-miR-196a*&organism=9606
hsa-miR-196a-3p	MIMAT0004562	hsa-miR-196a*	79969	C6orf134	-0.49	http://www.microrna.org/microrna/getMrna.do?gene=79969&matureName=hsa-miR-196a*&organism=9606
hsa-miR-196a-3p	MIMAT0004562	hsa-miR-196a*	79969	C6orf134	-0.15	http://www.microrna.org/microrna/getMrna.do?gene=79969&matureName=hsa-miR-196a*&organism=9606
hsa-miR-196a-3p	MIMAT0004562	hsa-miR-196a*	1728	NQO1	-1.06	http://www.microrna.org/microrna/getMrna.do?gene=1728&matureName=hsa-miR-196a*&organism=9606
hsa-miR-196a-3p	MIMAT0004562	hsa-miR-196a*	634	CEACAM1	-0.27	http://www.microrna.org/microrna/getMrna.do?gene=634&matureName=hsa-miR-196a*&organism=9606
hsa-miR-196a-3p	MIMAT0004562	hsa-miR-196a*	196394	AMN1	-0.95	http://www.microrna.org/microrna/getMrna.do?gene=196394&matureName=hsa-miR-196a*&organism=9606
hsa-miR-196a-3p	MIMAT0004562	hsa-miR-196a*	9802	DAZAP2	-0.99	http://www.microrna.org/microrna/getMrna.do?gene=9802&matureName=hsa-miR-196a*&organism=9606
hsa-miR-196a-3p	MIMAT0004562	hsa-miR-196a*	9802	DAZAP2	-0.35	http://www.microrna.org/microrna/getMrna.do?gene=9802&matureName=hsa-miR-196a*&organism=9606
hsa-miR-196a-3p	MIMAT0004562	hsa-miR-196a*	1434	CSE1L	-0.13	http://www.microrna.org/microrna/getMrna.do?gene=1434&matureName=hsa-miR-196a*&organism=9606
hsa-miR-196a-3p	MIMAT0004562	hsa-miR-196a*	1434	CSE1L	-0.1	http://www.microrna.org/microrna/getMrna.do?gene=1434&matureName=hsa-miR-196a*&organism=9606
hsa-miR-196a-3p	MIMAT0004562	hsa-miR-196a*	55336	FBXL8	-0.23	http://www.microrna.org/microrna/getMrna.do?gene=55336&matureName=hsa-miR-196a*&organism=9606
hsa-miR-196a-3p	MIMAT0004562	hsa-miR-196a*	7247	TSN	-0.65	http://www.microrna.org/microrna/getMrna.do?gene=7247&matureName=hsa-miR-196a*&organism=9606
hsa-miR-196a-3p	MIMAT0004562	hsa-miR-196a*	23767	FLRT3	-1.23	http://www.microrna.org/microrna/getMrna.do?gene=23767&matureName=hsa-miR-196a*&organism=9606
hsa-miR-196a-3p	MIMAT0004562	hsa-miR-196a*	441355	FLJ39080	-0.48	http://www.microrna.org/microrna/getMrna.do?gene=441355&matureName=hsa-miR-196a*&organism=9606
hsa-miR-196a-3p	MIMAT0004562	hsa-miR-196a*	202020	FLJ39653	-0.29	http://www.microrna.org/microrna/getMrna.do?gene=202020&matureName=hsa-miR-196a*&organism=9606
hsa-miR-196a-3p	MIMAT0004562	hsa-miR-196a*	197335	WDR90	-0.51	http://www.microrna.org/microrna/getMrna.do?gene=197335&matureName=hsa-miR-196a*&organism=9606
hsa-miR-196a-3p	MIMAT0004562	hsa-miR-196a*	90527	DUOXA1	-0.37	http://www.microrna.org/microrna/getMrna.do?gene=90527&matureName=hsa-miR-196a*&organism=9606
hsa-miR-196a-3p	MIMAT0004562	hsa-miR-196a*	80742	PRR3	-0.11	http://www.microrna.org/microrna/getMrna.do?gene=80742&matureName=hsa-miR-196a*&organism=9606
hsa-miR-196a-3p	MIMAT0004562	hsa-miR-196a*	613	BCR	-0.7	http://www.microrna.org/microrna/getMrna.do?gene=613&matureName=hsa-miR-196a*&organism=9606
hsa-miR-196a-3p	MIMAT0004562	hsa-miR-196a*	55667	DENND4C	-1	http://www.microrna.org/microrna/getMrna.do?gene=55667&matureName=hsa-miR-196a*&organism=9606
hsa-miR-196a-3p	MIMAT0004562	hsa-miR-196a*	118432	RPL29P2	-0.55	http://www.microrna.org/microrna/getMrna.do?gene=118432&matureName=hsa-miR-196a*&organism=9606
hsa-miR-196a-3p	MIMAT0004562	hsa-miR-196a*	2700	GJA3	-0.24	http://www.microrna.org/microrna/getMrna.do?gene=2700&matureName=hsa-miR-196a*&organism=9606
hsa-miR-196a-3p	MIMAT0004562	hsa-miR-196a*	55076	TMEM45A	-0.15	http://www.microrna.org/microrna/getMrna.do?gene=55076&matureName=hsa-miR-196a*&organism=9606
hsa-miR-196a-3p	MIMAT0004562	hsa-miR-196a*	7035	TFPI	-0.55	http://www.microrna.org/microrna/getMrna.do?gene=7035&matureName=hsa-miR-196a*&organism=9606
hsa-miR-196a-3p	MIMAT0004562	hsa-miR-196a*	286967	NCRNA00204B	-0.3	http://www.microrna.org/microrna/getMrna.do?gene=286967&matureName=hsa-miR-196a*&organism=9606
hsa-miR-196a-3p	MIMAT0004562	hsa-miR-196a*	286967	NCRNA00204B	-0.2	http://www.microrna.org/microrna/getMrna.do?gene=286967&matureName=hsa-miR-196a*&organism=9606
hsa-miR-196a-3p	MIMAT0004562	hsa-miR-196a*	54901	CDKAL1	-0.24	http://www.microrna.org/microrna/getMrna.do?gene=54901&matureName=hsa-miR-196a*&organism=9606
hsa-miR-196a-3p	MIMAT0004562	hsa-miR-196a*	6934	TCF7L2	-0.1	http://www.microrna.org/microrna/getMrna.do?gene=6934&matureName=hsa-miR-196a*&organism=9606
hsa-miR-196a-3p	MIMAT0004562	hsa-miR-196a*	92595	ZNF764	-0.19	http://www.microrna.org/microrna/getMrna.do?gene=92595&matureName=hsa-miR-196a*&organism=9606
hsa-miR-196a-3p	MIMAT0004562	hsa-miR-196a*	788	SLC25A20	-0.33	http://www.microrna.org/microrna/getMrna.do?gene=788&matureName=hsa-miR-196a*&organism=9606
hsa-miR-196a-3p	MIMAT0004562	hsa-miR-196a*	55118	CRTAC1	-1.03	http://www.microrna.org/microrna/getMrna.do?gene=55118&matureName=hsa-miR-196a*&organism=9606
hsa-miR-196a-3p	MIMAT0004562	hsa-miR-196a*	80095	ZNF606	-0.18	http://www.microrna.org/microrna/getMrna.do?gene=80095&matureName=hsa-miR-196a*&organism=9606
hsa-miR-196a-3p	MIMAT0004562	hsa-miR-196a*	56658	TRIM39	-1.08	http://www.microrna.org/microrna/getMrna.do?gene=56658&matureName=hsa-miR-196a*&organism=9606
hsa-miR-196a-3p	MIMAT0004562	hsa-miR-196a*	253827	MSRB3	-0.9	http://www.microrna.org/microrna/getMrna.do?gene=253827&matureName=hsa-miR-196a*&organism=9606
hsa-miR-196a-3p	MIMAT0004562	hsa-miR-196a*	57209	ZNF248	-0.1	http://www.microrna.org/microrna/getMrna.do?gene=57209&matureName=hsa-miR-196a*&organism=9606
hsa-miR-196a-3p	MIMAT0004562	hsa-miR-196a*	9586	CREB5	-0.1	http://www.microrna.org/microrna/getMrna.do?gene=9586&matureName=hsa-miR-196a*&organism=9606
hsa-miR-196a-3p	MIMAT0004562	hsa-miR-196a*	2672	GFI1	-0.14	http://www.microrna.org/microrna/getMrna.do?gene=2672&matureName=hsa-miR-196a*&organism=9606
hsa-miR-196a-3p	MIMAT0004562	hsa-miR-196a*	6941	TCF19	-0.67	http://www.microrna.org/microrna/getMrna.do?gene=6941&matureName=hsa-miR-196a*&organism=9606
hsa-miR-196a-3p	MIMAT0004562	hsa-miR-196a*	6521	SLC4A1	-0.1	http://www.microrna.org/microrna/getMrna.do?gene=6521&matureName=hsa-miR-196a*&organism=9606
hsa-miR-196a-3p	MIMAT0004562	hsa-miR-196a*	9025	RNF8	-0.12	http://www.microrna.org/microrna/getMrna.do?gene=9025&matureName=hsa-miR-196a*&organism=9606
hsa-miR-196a-3p	MIMAT0004562	hsa-miR-196a*	2844	GPR21	-0.25	http://www.microrna.org/microrna/getMrna.do?gene=2844&matureName=hsa-miR-196a*&organism=9606
hsa-miR-196a-3p	MIMAT0004562	hsa-miR-196a*	145773	FAM81A	-0.98	http://www.microrna.org/microrna/getMrna.do?gene=145773&matureName=hsa-miR-196a*&organism=9606
hsa-miR-196a-3p	MIMAT0004562	hsa-miR-196a*	4241	MFI2	-0.12	http://www.microrna.org/microrna/getMrna.do?gene=4241&matureName=hsa-miR-196a*&organism=9606
hsa-miR-196a-3p	MIMAT0004562	hsa-miR-196a*	26140	TTLL3	-0.31	http://www.microrna.org/microrna/getMrna.do?gene=26140&matureName=hsa-miR-196a*&organism=9606
hsa-miR-196a-3p	MIMAT0004562	hsa-miR-196a*	9972	NUP153	-0.51	http://www.microrna.org/microrna/getMrna.do?gene=9972&matureName=hsa-miR-196a*&organism=9606
hsa-miR-196a-3p	MIMAT0004562	hsa-miR-196a*	130733	TMEM178	-1.15	http://www.microrna.org/microrna/getMrna.do?gene=130733&matureName=hsa-miR-196a*&organism=9606
hsa-miR-196a-3p	MIMAT0004562	hsa-miR-196a*	130733	TMEM178	-0.38	http://www.microrna.org/microrna/getMrna.do?gene=130733&matureName=hsa-miR-196a*&organism=9606
hsa-miR-196a-3p	MIMAT0004562	hsa-miR-196a*	219670	ENKUR	-0.45	http://www.microrna.org/microrna/getMrna.do?gene=219670&matureName=hsa-miR-196a*&organism=9606
hsa-miR-196a-3p	MIMAT0004562	hsa-miR-196a*	3655	ITGA6	-0.68	http://www.microrna.org/microrna/getMrna.do?gene=3655&matureName=hsa-miR-196a*&organism=9606
hsa-miR-196a-3p	MIMAT0004562	hsa-miR-196a*	79589	RNF128	-0.22	http://www.microrna.org/microrna/getMrna.do?gene=79589&matureName=hsa-miR-196a*&organism=9606
hsa-miR-196a-3p	MIMAT0004562	hsa-miR-196a*	56916	SMARCAD1	-0.31	http://www.microrna.org/microrna/getMrna.do?gene=56916&matureName=hsa-miR-196a*&organism=9606
hsa-miR-196a-3p	MIMAT0004562	hsa-miR-196a*	100133941	CD24	-0.13	http://www.microrna.org/microrna/getMrna.do?gene=100133941&matureName=hsa-miR-196a*&organism=9606
hsa-miR-196a-3p	MIMAT0004562	hsa-miR-196a*	51384	WNT16	-0.42	http://www.microrna.org/microrna/getMrna.do?gene=51384&matureName=hsa-miR-196a*&organism=9606
hsa-miR-196a-3p	MIMAT0004562	hsa-miR-196a*	1795	DOCK3	-0.63	http://www.microrna.org/microrna/getMrna.do?gene=1795&matureName=hsa-miR-196a*&organism=9606
hsa-miR-196a-3p	MIMAT0004562	hsa-miR-196a*	4820	NKTR	-0.17	http://www.microrna.org/microrna/getMrna.do?gene=4820&matureName=hsa-miR-196a*&organism=9606
hsa-miR-196a-3p	MIMAT0004562	hsa-miR-196a*	64895	PAPOLG	-1.03	http://www.microrna.org/microrna/getMrna.do?gene=64895&matureName=hsa-miR-196a*&organism=9606
hsa-miR-196a-3p	MIMAT0004562	hsa-miR-196a*	58499	ZNF462	-0.12	http://www.microrna.org/microrna/getMrna.do?gene=58499&matureName=hsa-miR-196a*&organism=9606
hsa-miR-196a-3p	MIMAT0004562	hsa-miR-196a*	158381	LOC158381	-0.47	http://www.microrna.org/microrna/getMrna.do?gene=158381&matureName=hsa-miR-196a*&organism=9606
hsa-miR-196a-3p	MIMAT0004562	hsa-miR-196a*	6882	TAF11	-0.3	http://www.microrna.org/microrna/getMrna.do?gene=6882&matureName=hsa-miR-196a*&organism=9606
hsa-miR-196a-3p	MIMAT0004562	hsa-miR-196a*	284361	C19orf63	-0.21	http://www.microrna.org/microrna/getMrna.do?gene=284361&matureName=hsa-miR-196a*&organism=9606
hsa-miR-196a-3p	MIMAT0004562	hsa-miR-196a*	10260	DENND4A	-0.14	http://www.microrna.org/microrna/getMrna.do?gene=10260&matureName=hsa-miR-196a*&organism=9606
hsa-miR-196a-3p	MIMAT0004562	hsa-miR-196a*	25959	KANK2	-0.61	http://www.microrna.org/microrna/getMrna.do?gene=25959&matureName=hsa-miR-196a*&organism=9606
hsa-miR-196a-3p	MIMAT0004562	hsa-miR-196a*	163	AP2B1	-0.14	http://www.microrna.org/microrna/getMrna.do?gene=163&matureName=hsa-miR-196a*&organism=9606
hsa-miR-196a-3p	MIMAT0004562	hsa-miR-196a*	167681	PRSS35	-1.16	http://www.microrna.org/microrna/getMrna.do?gene=167681&matureName=hsa-miR-196a*&organism=9606
hsa-miR-196a-3p	MIMAT0004562	hsa-miR-196a*	10003	NAALAD2	-0.17	http://www.microrna.org/microrna/getMrna.do?gene=10003&matureName=hsa-miR-196a*&organism=9606
hsa-miR-196a-3p	MIMAT0004562	hsa-miR-196a*	9815	GIT2	-0.23	http://www.microrna.org/microrna/getMrna.do?gene=9815&matureName=hsa-miR-196a*&organism=9606
hsa-miR-196a-3p	MIMAT0004562	hsa-miR-196a*	23344	ESYT1	-0.37	http://www.microrna.org/microrna/getMrna.do?gene=23344&matureName=hsa-miR-196a*&organism=9606
hsa-miR-196a-3p	MIMAT0004562	hsa-miR-196a*	6935	ZEB1	-0.1	http://www.microrna.org/microrna/getMrna.do?gene=6935&matureName=hsa-miR-196a*&organism=9606
hsa-miR-196a-3p	MIMAT0004562	hsa-miR-196a*	26013	L3MBTL	-0.3	http://www.microrna.org/microrna/getMrna.do?gene=26013&matureName=hsa-miR-196a*&organism=9606
hsa-miR-196a-3p	MIMAT0004562	hsa-miR-196a*	91875	TTC5	-0.86	http://www.microrna.org/microrna/getMrna.do?gene=91875&matureName=hsa-miR-196a*&organism=9606
hsa-miR-196a-3p	MIMAT0004562	hsa-miR-196a*	10982	MAPRE2	-0.29	http://www.microrna.org/microrna/getMrna.do?gene=10982&matureName=hsa-miR-196a*&organism=9606
hsa-miR-196a-3p	MIMAT0004562	hsa-miR-196a*	201501	ZBTB7C	-0.15	http://www.microrna.org/microrna/getMrna.do?gene=201501&matureName=hsa-miR-196a*&organism=9606
hsa-miR-196a-3p	MIMAT0004562	hsa-miR-196a*	8723	SNX4	-0.2	http://www.microrna.org/microrna/getMrna.do?gene=8723&matureName=hsa-miR-196a*&organism=9606
hsa-miR-196a-3p	MIMAT0004562	hsa-miR-196a*	8723	SNX4	-0.12	http://www.microrna.org/microrna/getMrna.do?gene=8723&matureName=hsa-miR-196a*&organism=9606
hsa-miR-196a-3p	MIMAT0004562	hsa-miR-196a*	57282	SLC4A10	-0.78	http://www.microrna.org/microrna/getMrna.do?gene=57282&matureName=hsa-miR-196a*&organism=9606
hsa-miR-196a-3p	MIMAT0004562	hsa-miR-196a*	4154	MBNL1	-0.46	http://www.microrna.org/microrna/getMrna.do?gene=4154&matureName=hsa-miR-196a*&organism=9606
hsa-miR-196a-3p	MIMAT0004562	hsa-miR-196a*	63977	PRDM15	-0.15	http://www.microrna.org/microrna/getMrna.do?gene=63977&matureName=hsa-miR-196a*&organism=9606
hsa-miR-196a-3p	MIMAT0004562	hsa-miR-196a*	203197	C9orf91	-0.21	http://www.microrna.org/microrna/getMrna.do?gene=203197&matureName=hsa-miR-196a*&organism=9606
hsa-miR-196a-3p	MIMAT0004562	hsa-miR-196a*	1404	HAPLN1	-0.94	http://www.microrna.org/microrna/getMrna.do?gene=1404&matureName=hsa-miR-196a*&organism=9606
hsa-miR-196a-3p	MIMAT0004562	hsa-miR-196a*	56341	PRMT8	-0.47	http://www.microrna.org/microrna/getMrna.do?gene=56341&matureName=hsa-miR-196a*&organism=9606
hsa-miR-196a-3p	MIMAT0004562	hsa-miR-196a*	694	BTG1	-0.38	http://www.microrna.org/microrna/getMrna.do?gene=694&matureName=hsa-miR-196a*&organism=9606
hsa-miR-196a-3p	MIMAT0004562	hsa-miR-196a*	399814	C10orf120	-0.89	http://www.microrna.org/microrna/getMrna.do?gene=399814&matureName=hsa-miR-196a*&organism=9606
hsa-miR-196a-3p	MIMAT0004562	hsa-miR-196a*	23196	FAM120A	-0.33	http://www.microrna.org/microrna/getMrna.do?gene=23196&matureName=hsa-miR-196a*&organism=9606
hsa-miR-196a-3p	MIMAT0004562	hsa-miR-196a*	23196	FAM120A	-0.17	http://www.microrna.org/microrna/getMrna.do?gene=23196&matureName=hsa-miR-196a*&organism=9606
hsa-miR-196a-3p	MIMAT0004562	hsa-miR-196a*	2487	FRZB	-1.05	http://www.microrna.org/microrna/getMrna.do?gene=2487&matureName=hsa-miR-196a*&organism=9606
hsa-miR-196a-3p	MIMAT0004562	hsa-miR-196a*	9118	INA	-0.38	http://www.microrna.org/microrna/getMrna.do?gene=9118&matureName=hsa-miR-196a*&organism=9606
hsa-miR-196a-3p	MIMAT0004562	hsa-miR-196a*	1791	DNTT	-0.1	http://www.microrna.org/microrna/getMrna.do?gene=1791&matureName=hsa-miR-196a*&organism=9606
hsa-miR-196a-3p	MIMAT0004562	hsa-miR-196a*	285852	TREML4	-0.31	http://www.microrna.org/microrna/getMrna.do?gene=285852&matureName=hsa-miR-196a*&organism=9606
hsa-miR-196a-3p	MIMAT0004562	hsa-miR-196a*	9988	DMTF1	-0.11	http://www.microrna.org/microrna/getMrna.do?gene=9988&matureName=hsa-miR-196a*&organism=9606
hsa-miR-196a-3p	MIMAT0004562	hsa-miR-196a*	5885	RAD21	-0.16	http://www.microrna.org/microrna/getMrna.do?gene=5885&matureName=hsa-miR-196a*&organism=9606
hsa-miR-196a-3p	MIMAT0004562	hsa-miR-196a*	5010	CLDN11	-0.1	http://www.microrna.org/microrna/getMrna.do?gene=5010&matureName=hsa-miR-196a*&organism=9606
hsa-miR-196a-3p	MIMAT0004562	hsa-miR-196a*	114818	KLHL29	-0.16	http://www.microrna.org/microrna/getMrna.do?gene=114818&matureName=hsa-miR-196a*&organism=9606
hsa-miR-196a-3p	MIMAT0004562	hsa-miR-196a*	6546	SLC8A1	-0.1	http://www.microrna.org/microrna/getMrna.do?gene=6546&matureName=hsa-miR-196a*&organism=9606
hsa-miR-196a-3p	MIMAT0004562	hsa-miR-196a*	6934	TCF7L2	-0.13	http://www.microrna.org/microrna/getMrna.do?gene=6934&matureName=hsa-miR-196a*&organism=9606
hsa-miR-196a-3p	MIMAT0004562	hsa-miR-196a*	2982	GUCY1A3	-0.13	http://www.microrna.org/microrna/getMrna.do?gene=2982&matureName=hsa-miR-196a*&organism=9606
hsa-miR-196a-3p	MIMAT0004562	hsa-miR-196a*	150472	CBWD2	-0.3	http://www.microrna.org/microrna/getMrna.do?gene=150472&matureName=hsa-miR-196a*&organism=9606
hsa-miR-196a-3p	MIMAT0004562	hsa-miR-196a*	51696	HECA	-0.17	http://www.microrna.org/microrna/getMrna.do?gene=51696&matureName=hsa-miR-196a*&organism=9606
hsa-miR-196a-3p	MIMAT0004562	hsa-miR-196a*	827	CAPN6	-0.19	http://www.microrna.org/microrna/getMrna.do?gene=827&matureName=hsa-miR-196a*&organism=9606
hsa-miR-196a-3p	MIMAT0004562	hsa-miR-196a*	1266	CNN3	-0.19	http://www.microrna.org/microrna/getMrna.do?gene=1266&matureName=hsa-miR-196a*&organism=9606
hsa-miR-196a-3p	MIMAT0004562	hsa-miR-196a*	3551	IKBKB	-0.51	http://www.microrna.org/microrna/getMrna.do?gene=3551&matureName=hsa-miR-196a*&organism=9606
hsa-miR-196a-3p	MIMAT0004562	hsa-miR-196a*	6543	SLC8A2	-0.15	http://www.microrna.org/microrna/getMrna.do?gene=6543&matureName=hsa-miR-196a*&organism=9606
hsa-miR-196a-3p	MIMAT0004562	hsa-miR-196a*	337867	UBAC2	-0.15	http://www.microrna.org/microrna/getMrna.do?gene=337867&matureName=hsa-miR-196a*&organism=9606
hsa-miR-196a-3p	MIMAT0004562	hsa-miR-196a*	23416	KCNH3	-0.12	http://www.microrna.org/microrna/getMrna.do?gene=23416&matureName=hsa-miR-196a*&organism=9606
hsa-miR-196a-3p	MIMAT0004562	hsa-miR-196a*	7372	UMPS	-0.13	http://www.microrna.org/microrna/getMrna.do?gene=7372&matureName=hsa-miR-196a*&organism=9606
hsa-miR-196a-3p	MIMAT0004562	hsa-miR-196a*	7372	UMPS	-0.7	http://www.microrna.org/microrna/getMrna.do?gene=7372&matureName=hsa-miR-196a*&organism=9606
hsa-miR-196a-3p	MIMAT0004562	hsa-miR-196a*	91663	MYADM	-0.26	http://www.microrna.org/microrna/getMrna.do?gene=91663&matureName=hsa-miR-196a*&organism=9606
hsa-miR-196a-3p	MIMAT0004562	hsa-miR-196a*	55176	SEC61A2	-0.86	http://www.microrna.org/microrna/getMrna.do?gene=55176&matureName=hsa-miR-196a*&organism=9606
hsa-miR-196a-3p	MIMAT0004562	hsa-miR-196a*	23220	DTX4	-0.1	http://www.microrna.org/microrna/getMrna.do?gene=23220&matureName=hsa-miR-196a*&organism=9606
hsa-miR-196a-3p	MIMAT0004562	hsa-miR-196a*	146862	UNC45B	-0.11	http://www.microrna.org/microrna/getMrna.do?gene=146862&matureName=hsa-miR-196a*&organism=9606
hsa-miR-196a-3p	MIMAT0004562	hsa-miR-196a*	92335	STRADA	-0.3	http://www.microrna.org/microrna/getMrna.do?gene=92335&matureName=hsa-miR-196a*&organism=9606
hsa-miR-196a-3p	MIMAT0004562	hsa-miR-196a*	3895	KTN1	-0.42	http://www.microrna.org/microrna/getMrna.do?gene=3895&matureName=hsa-miR-196a*&organism=9606
hsa-miR-196a-3p	MIMAT0004562	hsa-miR-196a*	3895	KTN1	-0.35	http://www.microrna.org/microrna/getMrna.do?gene=3895&matureName=hsa-miR-196a*&organism=9606
hsa-miR-196a-3p	MIMAT0004562	hsa-miR-196a*	5289	PIK3C3	-1	http://www.microrna.org/microrna/getMrna.do?gene=5289&matureName=hsa-miR-196a*&organism=9606
hsa-miR-196a-3p	MIMAT0004562	hsa-miR-196a*	64089	SNX16	-0.33	http://www.microrna.org/microrna/getMrna.do?gene=64089&matureName=hsa-miR-196a*&organism=9606
hsa-miR-196a-3p	MIMAT0004562	hsa-miR-196a*	26054	SENP6	-0.1	http://www.microrna.org/microrna/getMrna.do?gene=26054&matureName=hsa-miR-196a*&organism=9606
hsa-miR-196a-3p	MIMAT0004562	hsa-miR-196a*	79969	C6orf134	-0.45	http://www.microrna.org/microrna/getMrna.do?gene=79969&matureName=hsa-miR-196a*&organism=9606
hsa-miR-196a-3p	MIMAT0004562	hsa-miR-196a*	79969	C6orf134	-0.15	http://www.microrna.org/microrna/getMrna.do?gene=79969&matureName=hsa-miR-196a*&organism=9606
hsa-miR-196a-3p	MIMAT0004562	hsa-miR-196a*	10741	RBBP9	-0.45	http://www.microrna.org/microrna/getMrna.do?gene=10741&matureName=hsa-miR-196a*&organism=9606
hsa-miR-196a-3p	MIMAT0004562	hsa-miR-196a*	10741	RBBP9	-0.18	http://www.microrna.org/microrna/getMrna.do?gene=10741&matureName=hsa-miR-196a*&organism=9606
hsa-miR-196a-3p	MIMAT0004562	hsa-miR-196a*	8476	CDC42BPA	-0.28	http://www.microrna.org/microrna/getMrna.do?gene=8476&matureName=hsa-miR-196a*&organism=9606
hsa-miR-196a-3p	MIMAT0004562	hsa-miR-196a*	1657	DMXL1	-0.12	http://www.microrna.org/microrna/getMrna.do?gene=1657&matureName=hsa-miR-196a*&organism=9606
hsa-miR-196a-3p	MIMAT0004562	hsa-miR-196a*	2002	ELK1	-0.67	http://www.microrna.org/microrna/getMrna.do?gene=2002&matureName=hsa-miR-196a*&organism=9606
hsa-miR-196a-3p	MIMAT0004562	hsa-miR-196a*	337867	UBAC2	-0.32	http://www.microrna.org/microrna/getMrna.do?gene=337867&matureName=hsa-miR-196a*&organism=9606
hsa-miR-196a-3p	MIMAT0004562	hsa-miR-196a*	389668	XKR9	-0.77	http://www.microrna.org/microrna/getMrna.do?gene=389668&matureName=hsa-miR-196a*&organism=9606
hsa-miR-196a-3p	MIMAT0004562	hsa-miR-196a*	114044	MCM3APAS	-0.1	http://www.microrna.org/microrna/getMrna.do?gene=114044&matureName=hsa-miR-196a*&organism=9606
hsa-miR-196a-3p	MIMAT0004562	hsa-miR-196a*	54838	C10orf26	-0.17	http://www.microrna.org/microrna/getMrna.do?gene=54838&matureName=hsa-miR-196a*&organism=9606
hsa-miR-196a-3p	MIMAT0004562	hsa-miR-196a*	1960	EGR3	-1.25	http://www.microrna.org/microrna/getMrna.do?gene=1960&matureName=hsa-miR-196a*&organism=9606
hsa-miR-196a-3p	MIMAT0004562	hsa-miR-196a*	474149	TTTY4B	-1.28	http://www.microrna.org/microrna/getMrna.do?gene=474149&matureName=hsa-miR-196a*&organism=9606
hsa-miR-196a-3p	MIMAT0004562	hsa-miR-196a*	26953	RANBP6	-0.43	http://www.microrna.org/microrna/getMrna.do?gene=26953&matureName=hsa-miR-196a*&organism=9606
hsa-miR-196a-3p	MIMAT0004562	hsa-miR-196a*	9019	MPZL1	-0.35	http://www.microrna.org/microrna/getMrna.do?gene=9019&matureName=hsa-miR-196a*&organism=9606
hsa-miR-196a-3p	MIMAT0004562	hsa-miR-196a*	112770	C1orf85	-0.11	http://www.microrna.org/microrna/getMrna.do?gene=112770&matureName=hsa-miR-196a*&organism=9606
hsa-miR-196a-3p	MIMAT0004562	hsa-miR-196a*	84343	HPS3	-0.65	http://www.microrna.org/microrna/getMrna.do?gene=84343&matureName=hsa-miR-196a*&organism=9606
hsa-miR-196a-3p	MIMAT0004562	hsa-miR-196a*	10121	ACTR1A	-0.9	http://www.microrna.org/microrna/getMrna.do?gene=10121&matureName=hsa-miR-196a*&organism=9606
hsa-miR-196a-3p	MIMAT0004562	hsa-miR-196a*	7223	TRPC4	-0.33	http://www.microrna.org/microrna/getMrna.do?gene=7223&matureName=hsa-miR-196a*&organism=9606
hsa-miR-196a-3p	MIMAT0004562	hsa-miR-196a*	348808	NCRNA00119	-0.18	http://www.microrna.org/microrna/getMrna.do?gene=348808&matureName=hsa-miR-196a*&organism=9606
hsa-miR-196a-3p	MIMAT0004562	hsa-miR-196a*	27018	NGFRAP1	-1.11	http://www.microrna.org/microrna/getMrna.do?gene=27018&matureName=hsa-miR-196a*&organism=9606
hsa-miR-196a-3p	MIMAT0004562	hsa-miR-196a*	9204	ZMYM6	-0.2	http://www.microrna.org/microrna/getMrna.do?gene=9204&matureName=hsa-miR-196a*&organism=9606
hsa-miR-196a-3p	MIMAT0004562	hsa-miR-196a*	9204	ZMYM6	-0.34	http://www.microrna.org/microrna/getMrna.do?gene=9204&matureName=hsa-miR-196a*&organism=9606
hsa-miR-196a-3p	MIMAT0004562	hsa-miR-196a*	9204	ZMYM6	-0.12	http://www.microrna.org/microrna/getMrna.do?gene=9204&matureName=hsa-miR-196a*&organism=9606
hsa-miR-196a-3p	MIMAT0004562	hsa-miR-196a*	647979	LOC647979	-0.13	http://www.microrna.org/microrna/getMrna.do?gene=647979&matureName=hsa-miR-196a*&organism=9606
hsa-miR-196a-3p	MIMAT0004562	hsa-miR-196a*	132864	CPEB2	-0.14	http://www.microrna.org/microrna/getMrna.do?gene=132864&matureName=hsa-miR-196a*&organism=9606
hsa-miR-196a-3p	MIMAT0004562	hsa-miR-196a*	132864	CPEB2	-0.25	http://www.microrna.org/microrna/getMrna.do?gene=132864&matureName=hsa-miR-196a*&organism=9606
hsa-miR-196a-3p	MIMAT0004562	hsa-miR-196a*	23609	MKRN2	-0.31	http://www.microrna.org/microrna/getMrna.do?gene=23609&matureName=hsa-miR-196a*&organism=9606
hsa-miR-196a-3p	MIMAT0004562	hsa-miR-196a*	6314	ATXN7	-0.1	http://www.microrna.org/microrna/getMrna.do?gene=6314&matureName=hsa-miR-196a*&organism=9606
hsa-miR-196a-3p	MIMAT0004562	hsa-miR-196a*	7851	MALL	-0.42	http://www.microrna.org/microrna/getMrna.do?gene=7851&matureName=hsa-miR-196a*&organism=9606
hsa-miR-196a-3p	MIMAT0004562	hsa-miR-196a*	89932	PAPLN	-0.12	http://www.microrna.org/microrna/getMrna.do?gene=89932&matureName=hsa-miR-196a*&organism=9606
hsa-miR-196a-3p	MIMAT0004562	hsa-miR-196a*	165215	FAM171B	-0.77	http://www.microrna.org/microrna/getMrna.do?gene=165215&matureName=hsa-miR-196a*&organism=9606
hsa-miR-196a-3p	MIMAT0004562	hsa-miR-196a*	11314	CD300A	-0.16	http://www.microrna.org/microrna/getMrna.do?gene=11314&matureName=hsa-miR-196a*&organism=9606
hsa-miR-196a-3p	MIMAT0004562	hsa-miR-196a*	2137	EXTL3	-0.12	http://www.microrna.org/microrna/getMrna.do?gene=2137&matureName=hsa-miR-196a*&organism=9606
hsa-miR-196a-3p	MIMAT0004562	hsa-miR-196a*	8809	IL18R1	-0.52	http://www.microrna.org/microrna/getMrna.do?gene=8809&matureName=hsa-miR-196a*&organism=9606
hsa-miR-196a-3p	MIMAT0004562	hsa-miR-196a*	54584	GNB1L	-0.23	http://www.microrna.org/microrna/getMrna.do?gene=54584&matureName=hsa-miR-196a*&organism=9606
hsa-miR-196a-3p	MIMAT0004562	hsa-miR-196a*	4801	NFYB	-0.13	http://www.microrna.org/microrna/getMrna.do?gene=4801&matureName=hsa-miR-196a*&organism=9606
hsa-miR-196a-3p	MIMAT0004562	hsa-miR-196a*	221150	SKA3	-0.75	http://www.microrna.org/microrna/getMrna.do?gene=221150&matureName=hsa-miR-196a*&organism=9606
hsa-miR-196a-3p	MIMAT0004562	hsa-miR-196a*	5987	TRIM27	-0.22	http://www.microrna.org/microrna/getMrna.do?gene=5987&matureName=hsa-miR-196a*&organism=9606
hsa-miR-196a-3p	MIMAT0004562	hsa-miR-196a*	9522	SCAMP1	-0.22	http://www.microrna.org/microrna/getMrna.do?gene=9522&matureName=hsa-miR-196a*&organism=9606
hsa-miR-196a-3p	MIMAT0004562	hsa-miR-196a*	55803	ADAP2	-0.39	http://www.microrna.org/microrna/getMrna.do?gene=55803&matureName=hsa-miR-196a*&organism=9606
hsa-miR-196a-3p	MIMAT0004562	hsa-miR-196a*	3131	HLF	-0.25	http://www.microrna.org/microrna/getMrna.do?gene=3131&matureName=hsa-miR-196a*&organism=9606
hsa-miR-196a-3p	MIMAT0004562	hsa-miR-196a*	54165	DCUN1D1	-0.11	http://www.microrna.org/microrna/getMrna.do?gene=54165&matureName=hsa-miR-196a*&organism=9606
hsa-miR-196a-3p	MIMAT0004562	hsa-miR-196a*	394	ARHGAP5	-0.47	http://www.microrna.org/microrna/getMrna.do?gene=394&matureName=hsa-miR-196a*&organism=9606
hsa-miR-196a-3p	MIMAT0004562	hsa-miR-196a*	54329	GPR85	-0.87	http://www.microrna.org/microrna/getMrna.do?gene=54329&matureName=hsa-miR-196a*&organism=9606
hsa-miR-196a-3p	MIMAT0004562	hsa-miR-196a*	54749	EPDR1	-0.9	http://www.microrna.org/microrna/getMrna.do?gene=54749&matureName=hsa-miR-196a*&organism=9606
hsa-miR-196a-3p	MIMAT0004562	hsa-miR-196a*	220965	FAM13C	-0.15	http://www.microrna.org/microrna/getMrna.do?gene=220965&matureName=hsa-miR-196a*&organism=9606
hsa-miR-196a-3p	MIMAT0004562	hsa-miR-196a*	65983	GRAMD3	-0.1	http://www.microrna.org/microrna/getMrna.do?gene=65983&matureName=hsa-miR-196a*&organism=9606
hsa-miR-196a-3p	MIMAT0004562	hsa-miR-196a*	57176	VARS2	-0.11	http://www.microrna.org/microrna/getMrna.do?gene=57176&matureName=hsa-miR-196a*&organism=9606
hsa-miR-196a-3p	MIMAT0004562	hsa-miR-196a*	401303	ZNF815	-0.15	http://www.microrna.org/microrna/getMrna.do?gene=401303&matureName=hsa-miR-196a*&organism=9606
hsa-miR-196a-3p	MIMAT0004562	hsa-miR-196a*	100287932	TIMM23	-0.81	http://www.microrna.org/microrna/getMrna.do?gene=100287932&matureName=hsa-miR-196a*&organism=9606
hsa-miR-196a-3p	MIMAT0004562	hsa-miR-196a*	100287932	TIMM23	-0.15	http://www.microrna.org/microrna/getMrna.do?gene=100287932&matureName=hsa-miR-196a*&organism=9606
hsa-miR-196a-3p	MIMAT0004562	hsa-miR-196a*	26262	TSPAN17	-0.41	http://www.microrna.org/microrna/getMrna.do?gene=26262&matureName=hsa-miR-196a*&organism=9606
hsa-miR-196a-3p	MIMAT0004562	hsa-miR-196a*	222235	FBXL13	-0.15	http://www.microrna.org/microrna/getMrna.do?gene=222235&matureName=hsa-miR-196a*&organism=9606
hsa-miR-196a-3p	MIMAT0004562	hsa-miR-196a*	26088	GGA1	-0.16	http://www.microrna.org/microrna/getMrna.do?gene=26088&matureName=hsa-miR-196a*&organism=9606
hsa-miR-196a-3p	MIMAT0004562	hsa-miR-196a*	201626	PDE12	-0.13	http://www.microrna.org/microrna/getMrna.do?gene=201626&matureName=hsa-miR-196a*&organism=9606
hsa-miR-196a-3p	MIMAT0004562	hsa-miR-196a*	5970	RELA	-1.17	http://www.microrna.org/microrna/getMrna.do?gene=5970&matureName=hsa-miR-196a*&organism=9606
hsa-miR-196a-3p	MIMAT0004562	hsa-miR-196a*	79057	PRRG3	-1.23	http://www.microrna.org/microrna/getMrna.do?gene=79057&matureName=hsa-miR-196a*&organism=9606
hsa-miR-196a-3p	MIMAT0004562	hsa-miR-196a*	9734	HDAC9	-0.56	http://www.microrna.org/microrna/getMrna.do?gene=9734&matureName=hsa-miR-196a*&organism=9606
hsa-miR-196a-3p	MIMAT0004562	hsa-miR-196a*	54801	HAUS6	-0.43	http://www.microrna.org/microrna/getMrna.do?gene=54801&matureName=hsa-miR-196a*&organism=9606
hsa-miR-196a-3p	MIMAT0004562	hsa-miR-196a*	83695	C12orf32	-0.14	http://www.microrna.org/microrna/getMrna.do?gene=83695&matureName=hsa-miR-196a*&organism=9606
hsa-miR-196a-3p	MIMAT0004562	hsa-miR-196a*	6314	ATXN7	-0.16	http://www.microrna.org/microrna/getMrna.do?gene=6314&matureName=hsa-miR-196a*&organism=9606
hsa-miR-196a-3p	MIMAT0004562	hsa-miR-196a*	1200	TPP1	-0.47	http://www.microrna.org/microrna/getMrna.do?gene=1200&matureName=hsa-miR-196a*&organism=9606
hsa-miR-196a-3p	MIMAT0004562	hsa-miR-196a*	653129	PTPN20A	-0.54	http://www.microrna.org/microrna/getMrna.do?gene=653129&matureName=hsa-miR-196a*&organism=9606
hsa-miR-196a-3p	MIMAT0004562	hsa-miR-196a*	6638	SNRPN	-0.18	http://www.microrna.org/microrna/getMrna.do?gene=6638&matureName=hsa-miR-196a*&organism=9606
hsa-miR-196a-3p	MIMAT0004562	hsa-miR-196a*	128338	DRAM2	-0.25	http://www.microrna.org/microrna/getMrna.do?gene=128338&matureName=hsa-miR-196a*&organism=9606
hsa-miR-196a-3p	MIMAT0004562	hsa-miR-196a*	57692	MAGEE1	-0.2	http://www.microrna.org/microrna/getMrna.do?gene=57692&matureName=hsa-miR-196a*&organism=9606
hsa-miR-196a-3p	MIMAT0004562	hsa-miR-196a*	6938	TCF12	-0.84	http://www.microrna.org/microrna/getMrna.do?gene=6938&matureName=hsa-miR-196a*&organism=9606
hsa-miR-196a-3p	MIMAT0004562	hsa-miR-196a*	7753	ZNF202	-0.49	http://www.microrna.org/microrna/getMrna.do?gene=7753&matureName=hsa-miR-196a*&organism=9606
hsa-miR-196a-3p	MIMAT0004562	hsa-miR-196a*	7753	ZNF202	-0.56	http://www.microrna.org/microrna/getMrna.do?gene=7753&matureName=hsa-miR-196a*&organism=9606
hsa-miR-196a-3p	MIMAT0004562	hsa-miR-196a*	7247	TSN	-0.76	http://www.microrna.org/microrna/getMrna.do?gene=7247&matureName=hsa-miR-196a*&organism=9606
hsa-miR-196a-3p	MIMAT0004562	hsa-miR-196a*	8315	BRAP	-0.12	http://www.microrna.org/microrna/getMrna.do?gene=8315&matureName=hsa-miR-196a*&organism=9606
hsa-miR-196a-3p	MIMAT0004562	hsa-miR-196a*	1265	CNN2	-0.13	http://www.microrna.org/microrna/getMrna.do?gene=1265&matureName=hsa-miR-196a*&organism=9606
hsa-miR-196a-3p	MIMAT0004562	hsa-miR-196a*	9877	ZC3H11A	-0.22	http://www.microrna.org/microrna/getMrna.do?gene=9877&matureName=hsa-miR-196a*&organism=9606
hsa-miR-196a-3p	MIMAT0004562	hsa-miR-196a*	83595	SOX7	-0.87	http://www.microrna.org/microrna/getMrna.do?gene=83595&matureName=hsa-miR-196a*&organism=9606
hsa-miR-196a-3p	MIMAT0004562	hsa-miR-196a*	83595	SOX7	-0.29	http://www.microrna.org/microrna/getMrna.do?gene=83595&matureName=hsa-miR-196a*&organism=9606
hsa-miR-196a-3p	MIMAT0004562	hsa-miR-196a*	91754	NEK9	-0.71	http://www.microrna.org/microrna/getMrna.do?gene=91754&matureName=hsa-miR-196a*&organism=9606
hsa-miR-196a-3p	MIMAT0004562	hsa-miR-196a*	160492	IFLTD1	-0.3	http://www.microrna.org/microrna/getMrna.do?gene=160492&matureName=hsa-miR-196a*&organism=9606
hsa-miR-196a-3p	MIMAT0004562	hsa-miR-196a*	10558	SPTLC1	-0.12	http://www.microrna.org/microrna/getMrna.do?gene=10558&matureName=hsa-miR-196a*&organism=9606
hsa-miR-196a-3p	MIMAT0004562	hsa-miR-196a*	6892	TAPBP	-0.47	http://www.microrna.org/microrna/getMrna.do?gene=6892&matureName=hsa-miR-196a*&organism=9606
hsa-miR-196a-3p	MIMAT0004562	hsa-miR-196a*	5937	RBMS1	-0.34	http://www.microrna.org/microrna/getMrna.do?gene=5937&matureName=hsa-miR-196a*&organism=9606
hsa-miR-196a-3p	MIMAT0004562	hsa-miR-196a*	83606	C22orf13	-0.14	http://www.microrna.org/microrna/getMrna.do?gene=83606&matureName=hsa-miR-196a*&organism=9606
hsa-miR-196a-3p	MIMAT0004562	hsa-miR-196a*	114827	FHAD1	-0.16	http://www.microrna.org/microrna/getMrna.do?gene=114827&matureName=hsa-miR-196a*&organism=9606
hsa-miR-196a-3p	MIMAT0004562	hsa-miR-196a*	4033	LRMP	-0.38	http://www.microrna.org/microrna/getMrna.do?gene=4033&matureName=hsa-miR-196a*&organism=9606
hsa-miR-196a-3p	MIMAT0004562	hsa-miR-196a*	6892	TAPBP	-0.41	http://www.microrna.org/microrna/getMrna.do?gene=6892&matureName=hsa-miR-196a*&organism=9606
hsa-miR-196a-3p	MIMAT0004562	hsa-miR-196a*	53615	MBD3	-0.15	http://www.microrna.org/microrna/getMrna.do?gene=53615&matureName=hsa-miR-196a*&organism=9606
hsa-miR-196a-3p	MIMAT0004562	hsa-miR-196a*	283237	TTC9C	-0.11	http://www.microrna.org/microrna/getMrna.do?gene=283237&matureName=hsa-miR-196a*&organism=9606
hsa-miR-196a-3p	MIMAT0004562	hsa-miR-196a*	6570	SLC18A1	-0.67	http://www.microrna.org/microrna/getMrna.do?gene=6570&matureName=hsa-miR-196a*&organism=9606
hsa-miR-196a-3p	MIMAT0004562	hsa-miR-196a*	85360	SYDE1	-0.85	http://www.microrna.org/microrna/getMrna.do?gene=85360&matureName=hsa-miR-196a*&organism=9606
hsa-miR-196a-3p	MIMAT0004562	hsa-miR-196a*	25890	ABI3BP	-0.92	http://www.microrna.org/microrna/getMrna.do?gene=25890&matureName=hsa-miR-196a*&organism=9606
hsa-miR-196a-3p	MIMAT0004562	hsa-miR-196a*	23040	MYT1L	-0.48	http://www.microrna.org/microrna/getMrna.do?gene=23040&matureName=hsa-miR-196a*&organism=9606
hsa-miR-196a-3p	MIMAT0004562	hsa-miR-196a*	2295	FOXF2	-0.8	http://www.microrna.org/microrna/getMrna.do?gene=2295&matureName=hsa-miR-196a*&organism=9606
hsa-miR-196a-3p	MIMAT0004562	hsa-miR-196a*	2295	FOXF2	-0.35	http://www.microrna.org/microrna/getMrna.do?gene=2295&matureName=hsa-miR-196a*&organism=9606
hsa-miR-196a-3p	MIMAT0004562	hsa-miR-196a*	80765	STARD5	-0.36	http://www.microrna.org/microrna/getMrna.do?gene=80765&matureName=hsa-miR-196a*&organism=9606
hsa-miR-196a-3p	MIMAT0004562	hsa-miR-196a*	403313	PPAPDC2	-0.53	http://www.microrna.org/microrna/getMrna.do?gene=403313&matureName=hsa-miR-196a*&organism=9606
hsa-miR-196a-3p	MIMAT0004562	hsa-miR-196a*	57593	EBF4	-0.16	http://www.microrna.org/microrna/getMrna.do?gene=57593&matureName=hsa-miR-196a*&organism=9606
hsa-miR-196a-3p	MIMAT0004562	hsa-miR-196a*	57472	CNOT6	-0.66	http://www.microrna.org/microrna/getMrna.do?gene=57472&matureName=hsa-miR-196a*&organism=9606
hsa-miR-196a-3p	MIMAT0004562	hsa-miR-196a*	57472	CNOT6	-0.59	http://www.microrna.org/microrna/getMrna.do?gene=57472&matureName=hsa-miR-196a*&organism=9606
hsa-miR-196a-3p	MIMAT0004562	hsa-miR-196a*	54808	DYM	-0.17	http://www.microrna.org/microrna/getMrna.do?gene=54808&matureName=hsa-miR-196a*&organism=9606
hsa-miR-196a-3p	MIMAT0004562	hsa-miR-196a*	441425	ANKRD20A3	-1.19	http://www.microrna.org/microrna/getMrna.do?gene=441425&matureName=hsa-miR-196a*&organism=9606
hsa-miR-196a-3p	MIMAT0004562	hsa-miR-196a*	9712	USP6NL	-0.7	http://www.microrna.org/microrna/getMrna.do?gene=9712&matureName=hsa-miR-196a*&organism=9606
hsa-miR-196a-3p	MIMAT0004562	hsa-miR-196a*	1432	MAPK14	-0.12	http://www.microrna.org/microrna/getMrna.do?gene=1432&matureName=hsa-miR-196a*&organism=9606
hsa-miR-196a-3p	MIMAT0004562	hsa-miR-196a*	150378	FLJ30901	-0.2	http://www.microrna.org/microrna/getMrna.do?gene=150378&matureName=hsa-miR-196a*&organism=9606
hsa-miR-196a-3p	MIMAT0004562	hsa-miR-196a*	5918	RARRES1	-0.16	http://www.microrna.org/microrna/getMrna.do?gene=5918&matureName=hsa-miR-196a*&organism=9606
hsa-miR-196a-3p	MIMAT0004562	hsa-miR-196a*	246	ALOX15	-0.42	http://www.microrna.org/microrna/getMrna.do?gene=246&matureName=hsa-miR-196a*&organism=9606
hsa-miR-196a-3p	MIMAT0004562	hsa-miR-196a*	7804	LRP8	-0.14	http://www.microrna.org/microrna/getMrna.do?gene=7804&matureName=hsa-miR-196a*&organism=9606
hsa-miR-196a-3p	MIMAT0004562	hsa-miR-196a*	1176	AP3S1	-0.17	http://www.microrna.org/microrna/getMrna.do?gene=1176&matureName=hsa-miR-196a*&organism=9606
hsa-miR-196a-3p	MIMAT0004562	hsa-miR-196a*	1176	AP3S1	-1.1	http://www.microrna.org/microrna/getMrna.do?gene=1176&matureName=hsa-miR-196a*&organism=9606
hsa-miR-196a-3p	MIMAT0004562	hsa-miR-196a*	54815	GATAD2A	-0.13	http://www.microrna.org/microrna/getMrna.do?gene=54815&matureName=hsa-miR-196a*&organism=9606
hsa-miR-196a-3p	MIMAT0004562	hsa-miR-196a*	653129	PTPN20A	-0.58	http://www.microrna.org/microrna/getMrna.do?gene=653129&matureName=hsa-miR-196a*&organism=9606
hsa-miR-196a-3p	MIMAT0004562	hsa-miR-196a*	10143	CLEC3A	-0.89	http://www.microrna.org/microrna/getMrna.do?gene=10143&matureName=hsa-miR-196a*&organism=9606
hsa-miR-196a-3p	MIMAT0004562	hsa-miR-196a*	728689	EIF3CL	-0.85	http://www.microrna.org/microrna/getMrna.do?gene=728689&matureName=hsa-miR-196a*&organism=9606
hsa-miR-196a-3p	MIMAT0004562	hsa-miR-196a*	27316	RBMX	-1.14	http://www.microrna.org/microrna/getMrna.do?gene=27316&matureName=hsa-miR-196a*&organism=9606
hsa-miR-196a-3p	MIMAT0004562	hsa-miR-196a*	23171	GPD1L	-0.22	http://www.microrna.org/microrna/getMrna.do?gene=23171&matureName=hsa-miR-196a*&organism=9606
hsa-miR-196a-3p	MIMAT0004562	hsa-miR-196a*	55422	ZNF331	-0.92	http://www.microrna.org/microrna/getMrna.do?gene=55422&matureName=hsa-miR-196a*&organism=9606
hsa-miR-196a-3p	MIMAT0004562	hsa-miR-196a*	285605	DTWD2	-0.16	http://www.microrna.org/microrna/getMrna.do?gene=285605&matureName=hsa-miR-196a*&organism=9606
hsa-miR-196a-3p	MIMAT0004562	hsa-miR-196a*	10150	MBNL2	-0.1	http://www.microrna.org/microrna/getMrna.do?gene=10150&matureName=hsa-miR-196a*&organism=9606
hsa-miR-196a-3p	MIMAT0004562	hsa-miR-196a*	1511	CTSG	-0.25	http://www.microrna.org/microrna/getMrna.do?gene=1511&matureName=hsa-miR-196a*&organism=9606
hsa-miR-196a-3p	MIMAT0004562	hsa-miR-196a*	284260	LOC284260	-0.88	http://www.microrna.org/microrna/getMrna.do?gene=284260&matureName=hsa-miR-196a*&organism=9606
hsa-miR-196a-3p	MIMAT0004562	hsa-miR-196a*	144453	BEST3	-0.2	http://www.microrna.org/microrna/getMrna.do?gene=144453&matureName=hsa-miR-196a*&organism=9606
hsa-miR-196a-3p	MIMAT0004562	hsa-miR-196a*	55251	PCMTD2	-0.75	http://www.microrna.org/microrna/getMrna.do?gene=55251&matureName=hsa-miR-196a*&organism=9606
hsa-miR-196a-3p	MIMAT0004562	hsa-miR-196a*	6882	TAF11	-0.29	http://www.microrna.org/microrna/getMrna.do?gene=6882&matureName=hsa-miR-196a*&organism=9606
hsa-miR-196a-3p	MIMAT0004562	hsa-miR-196a*	80742	PRR3	-0.11	http://www.microrna.org/microrna/getMrna.do?gene=80742&matureName=hsa-miR-196a*&organism=9606
hsa-miR-196a-3p	MIMAT0004562	hsa-miR-196a*	11285	B4GALT7	-0.42	http://www.microrna.org/microrna/getMrna.do?gene=11285&matureName=hsa-miR-196a*&organism=9606
hsa-miR-196a-3p	MIMAT0004562	hsa-miR-196a*	11285	B4GALT7	-0.51	http://www.microrna.org/microrna/getMrna.do?gene=11285&matureName=hsa-miR-196a*&organism=9606
hsa-miR-196a-3p	MIMAT0004562	hsa-miR-196a*	80024	SLC24A6	-0.46	http://www.microrna.org/microrna/getMrna.do?gene=80024&matureName=hsa-miR-196a*&organism=9606
hsa-miR-196a-3p	MIMAT0004562	hsa-miR-196a*	6744	SSFA2	-0.19	http://www.microrna.org/microrna/getMrna.do?gene=6744&matureName=hsa-miR-196a*&organism=9606
hsa-miR-196a-3p	MIMAT0004562	hsa-miR-196a*	84695	LOXL3	-0.27	http://www.microrna.org/microrna/getMrna.do?gene=84695&matureName=hsa-miR-196a*&organism=9606
hsa-miR-196a-3p	MIMAT0004562	hsa-miR-196a*	5571	PRKAG1	-0.16	http://www.microrna.org/microrna/getMrna.do?gene=5571&matureName=hsa-miR-196a*&organism=9606
hsa-miR-196a-3p	MIMAT0004562	hsa-miR-196a*	1378	CR1	-0.15	http://www.microrna.org/microrna/getMrna.do?gene=1378&matureName=hsa-miR-196a*&organism=9606
hsa-miR-196a-3p	MIMAT0004562	hsa-miR-196a*	347731	LRRTM3	-0.56	http://www.microrna.org/microrna/getMrna.do?gene=347731&matureName=hsa-miR-196a*&organism=9606
hsa-miR-196a-3p	MIMAT0004562	hsa-miR-196a*	25900	IFFO1	-0.13	http://www.microrna.org/microrna/getMrna.do?gene=25900&matureName=hsa-miR-196a*&organism=9606
hsa-miR-196a-3p	MIMAT0004562	hsa-miR-196a*	1117	CHI3L2	-0.66	http://www.microrna.org/microrna/getMrna.do?gene=1117&matureName=hsa-miR-196a*&organism=9606
hsa-miR-196a-3p	MIMAT0004562	hsa-miR-196a*	51322	WAC	-0.85	http://www.microrna.org/microrna/getMrna.do?gene=51322&matureName=hsa-miR-196a*&organism=9606
hsa-miR-196a-3p	MIMAT0004562	hsa-miR-196a*	140739	UBE2F	-0.35	http://www.microrna.org/microrna/getMrna.do?gene=140739&matureName=hsa-miR-196a*&organism=9606
hsa-miR-196a-3p	MIMAT0004562	hsa-miR-196a*	6047	RNF4	-0.17	http://www.microrna.org/microrna/getMrna.do?gene=6047&matureName=hsa-miR-196a*&organism=9606
hsa-miR-196a-3p	MIMAT0004562	hsa-miR-196a*	55695	NSUN5	-0.29	http://www.microrna.org/microrna/getMrna.do?gene=55695&matureName=hsa-miR-196a*&organism=9606
hsa-miR-196a-3p	MIMAT0004562	hsa-miR-196a*	2935	GSPT1	-0.13	http://www.microrna.org/microrna/getMrna.do?gene=2935&matureName=hsa-miR-196a*&organism=9606
hsa-miR-196a-3p	MIMAT0004562	hsa-miR-196a*	2935	GSPT1	-0.19	http://www.microrna.org/microrna/getMrna.do?gene=2935&matureName=hsa-miR-196a*&organism=9606
hsa-miR-196a-3p	MIMAT0004562	hsa-miR-196a*	9943	OXSR1	-0.23	http://www.microrna.org/microrna/getMrna.do?gene=9943&matureName=hsa-miR-196a*&organism=9606
hsa-miR-196a-3p	MIMAT0004562	hsa-miR-196a*	54841	BIVM	-0.48	http://www.microrna.org/microrna/getMrna.do?gene=54841&matureName=hsa-miR-196a*&organism=9606
hsa-miR-196a-3p	MIMAT0004562	hsa-miR-196a*	51557	LGSN	-0.98	http://www.microrna.org/microrna/getMrna.do?gene=51557&matureName=hsa-miR-196a*&organism=9606
hsa-miR-196a-3p	MIMAT0004562	hsa-miR-196a*	467	ATF3	-0.1	http://www.microrna.org/microrna/getMrna.do?gene=467&matureName=hsa-miR-196a*&organism=9606
hsa-miR-196a-3p	MIMAT0004562	hsa-miR-196a*	148645	C1orf211	-0.34	http://www.microrna.org/microrna/getMrna.do?gene=148645&matureName=hsa-miR-196a*&organism=9606
hsa-miR-196a-3p	MIMAT0004562	hsa-miR-196a*	57176	VARS2	-0.12	http://www.microrna.org/microrna/getMrna.do?gene=57176&matureName=hsa-miR-196a*&organism=9606
hsa-miR-196a-3p	MIMAT0004562	hsa-miR-196a*	100132707	LOC100132707	-0.13	http://www.microrna.org/microrna/getMrna.do?gene=100132707&matureName=hsa-miR-196a*&organism=9606
hsa-miR-196a-3p	MIMAT0004562	hsa-miR-196a*	200734	SPRED2	-0.69	http://www.microrna.org/microrna/getMrna.do?gene=200734&matureName=hsa-miR-196a*&organism=9606
hsa-miR-196a-3p	MIMAT0004562	hsa-miR-196a*	58477	SRPRB	-0.16	http://www.microrna.org/microrna/getMrna.do?gene=58477&matureName=hsa-miR-196a*&organism=9606
hsa-miR-196a-3p	MIMAT0004562	hsa-miR-196a*	23168	RTF1	-1.01	http://www.microrna.org/microrna/getMrna.do?gene=23168&matureName=hsa-miR-196a*&organism=9606
hsa-miR-196a-3p	MIMAT0004562	hsa-miR-196a*	55695	NSUN5	-0.31	http://www.microrna.org/microrna/getMrna.do?gene=55695&matureName=hsa-miR-196a*&organism=9606
hsa-miR-196a-3p	MIMAT0004562	hsa-miR-196a*	253714	C6orf167	-0.11	http://www.microrna.org/microrna/getMrna.do?gene=253714&matureName=hsa-miR-196a*&organism=9606
hsa-miR-196a-3p	MIMAT0004562	hsa-miR-196a*	1650	DDOST	-0.94	http://www.microrna.org/microrna/getMrna.do?gene=1650&matureName=hsa-miR-196a*&organism=9606
hsa-miR-196a-3p	MIMAT0004562	hsa-miR-196a*	91298	C12orf29	-0.53	http://www.microrna.org/microrna/getMrna.do?gene=91298&matureName=hsa-miR-196a*&organism=9606
hsa-miR-196a-3p	MIMAT0004562	hsa-miR-196a*	3202	HOXA5	-0.25	http://www.microrna.org/microrna/getMrna.do?gene=3202&matureName=hsa-miR-196a*&organism=9606
hsa-miR-196a-3p	MIMAT0004562	hsa-miR-196a*	6941	TCF19	-0.67	http://www.microrna.org/microrna/getMrna.do?gene=6941&matureName=hsa-miR-196a*&organism=9606
hsa-miR-196a-3p	MIMAT0004562	hsa-miR-196a*	6427	SFRS2	-0.23	http://www.microrna.org/microrna/getMrna.do?gene=6427&matureName=hsa-miR-196a*&organism=9606
hsa-miR-196a-3p	MIMAT0004562	hsa-miR-196a*	23414	ZFPM2	-0.25	http://www.microrna.org/microrna/getMrna.do?gene=23414&matureName=hsa-miR-196a*&organism=9606
hsa-miR-196a-3p	MIMAT0004562	hsa-miR-196a*	23414	ZFPM2	-0.17	http://www.microrna.org/microrna/getMrna.do?gene=23414&matureName=hsa-miR-196a*&organism=9606
hsa-miR-196a-3p	MIMAT0004562	hsa-miR-196a*	134218	DNAJC21	-0.98	http://www.microrna.org/microrna/getMrna.do?gene=134218&matureName=hsa-miR-196a*&organism=9606
hsa-miR-196a-3p	MIMAT0004562	hsa-miR-196a*	641339	ZNF674	-0.2	http://www.microrna.org/microrna/getMrna.do?gene=641339&matureName=hsa-miR-196a*&organism=9606
hsa-miR-196a-3p	MIMAT0004562	hsa-miR-196a*	114801	TMEM200A	-1.16	http://www.microrna.org/microrna/getMrna.do?gene=114801&matureName=hsa-miR-196a*&organism=9606
hsa-miR-196a-3p	MIMAT0004562	hsa-miR-196a*	88455	ANKRD13A	-0.49	http://www.microrna.org/microrna/getMrna.do?gene=88455&matureName=hsa-miR-196a*&organism=9606
hsa-miR-196a-3p	MIMAT0004562	hsa-miR-196a*	88455	ANKRD13A	-0.56	http://www.microrna.org/microrna/getMrna.do?gene=88455&matureName=hsa-miR-196a*&organism=9606
hsa-miR-196a-3p	MIMAT0004562	hsa-miR-196a*	6934	TCF7L2	-0.1	http://www.microrna.org/microrna/getMrna.do?gene=6934&matureName=hsa-miR-196a*&organism=9606
hsa-miR-196a-3p	MIMAT0004562	hsa-miR-196a*	8741	TNFSF13	-0.28	http://www.microrna.org/microrna/getMrna.do?gene=8741&matureName=hsa-miR-196a*&organism=9606
hsa-miR-196a-3p	MIMAT0004562	hsa-miR-196a*	400322	HERC2P2	-0.78	http://www.microrna.org/microrna/getMrna.do?gene=400322&matureName=hsa-miR-196a*&organism=9606
hsa-miR-196a-3p	MIMAT0004562	hsa-miR-196a*	64478	CSMD1	-0.56	http://www.microrna.org/microrna/getMrna.do?gene=64478&matureName=hsa-miR-196a*&organism=9606
hsa-miR-196a-3p	MIMAT0004562	hsa-miR-196a*	81857	MED25	-0.78	http://www.microrna.org/microrna/getMrna.do?gene=81857&matureName=hsa-miR-196a*&organism=9606
hsa-miR-196a-3p	MIMAT0004562	hsa-miR-196a*	28973	MRPS18B	-0.89	http://www.microrna.org/microrna/getMrna.do?gene=28973&matureName=hsa-miR-196a*&organism=9606
hsa-miR-196a-3p	MIMAT0004562	hsa-miR-196a*	57645	POGK	-0.68	http://www.microrna.org/microrna/getMrna.do?gene=57645&matureName=hsa-miR-196a*&organism=9606
hsa-miR-196a-3p	MIMAT0004562	hsa-miR-196a*	26585	GREM1	-0.61	http://www.microrna.org/microrna/getMrna.do?gene=26585&matureName=hsa-miR-196a*&organism=9606
hsa-miR-196a-3p	MIMAT0004562	hsa-miR-196a*	23521	RPL13A	-0.25	http://www.microrna.org/microrna/getMrna.do?gene=23521&matureName=hsa-miR-196a*&organism=9606
hsa-miR-196a-3p	MIMAT0004562	hsa-miR-196a*	7337	UBE3A	-0.68	http://www.microrna.org/microrna/getMrna.do?gene=7337&matureName=hsa-miR-196a*&organism=9606
hsa-miR-196a-3p	MIMAT0004562	hsa-miR-196a*	388560	FLJ45949	-0.31	http://www.microrna.org/microrna/getMrna.do?gene=388560&matureName=hsa-miR-196a*&organism=9606
hsa-miR-196a-3p	MIMAT0004562	hsa-miR-196a*	6712	SPTBN2	-0.62	http://www.microrna.org/microrna/getMrna.do?gene=6712&matureName=hsa-miR-196a*&organism=9606
hsa-miR-196a-3p	MIMAT0004562	hsa-miR-196a*	9615	GDA	-0.48	http://www.microrna.org/microrna/getMrna.do?gene=9615&matureName=hsa-miR-196a*&organism=9606
hsa-miR-196a-3p	MIMAT0004562	hsa-miR-196a*	22823	MTF2	-0.95	http://www.microrna.org/microrna/getMrna.do?gene=22823&matureName=hsa-miR-196a*&organism=9606
hsa-miR-196a-3p	MIMAT0004562	hsa-miR-196a*	22823	MTF2	-0.12	http://www.microrna.org/microrna/getMrna.do?gene=22823&matureName=hsa-miR-196a*&organism=9606
hsa-miR-196a-3p	MIMAT0004562	hsa-miR-196a*	5793	PTPRG	-0.18	http://www.microrna.org/microrna/getMrna.do?gene=5793&matureName=hsa-miR-196a*&organism=9606
hsa-miR-196a-3p	MIMAT0004562	hsa-miR-196a*	1408	CRY2	-0.14	http://www.microrna.org/microrna/getMrna.do?gene=1408&matureName=hsa-miR-196a*&organism=9606
hsa-miR-196a-3p	MIMAT0004562	hsa-miR-196a*	1290	COL5A2	-0.99	http://www.microrna.org/microrna/getMrna.do?gene=1290&matureName=hsa-miR-196a*&organism=9606
hsa-miR-196a-3p	MIMAT0004562	hsa-miR-196a*	5293	PIK3CD	-0.19	http://www.microrna.org/microrna/getMrna.do?gene=5293&matureName=hsa-miR-196a*&organism=9606
hsa-miR-196a-3p	MIMAT0004562	hsa-miR-196a*	147991	DPY19L3	-0.71	http://www.microrna.org/microrna/getMrna.do?gene=147991&matureName=hsa-miR-196a*&organism=9606
hsa-miR-196a-3p	MIMAT0004562	hsa-miR-196a*	147991	DPY19L3	-0.62	http://www.microrna.org/microrna/getMrna.do?gene=147991&matureName=hsa-miR-196a*&organism=9606
hsa-miR-196a-3p	MIMAT0004562	hsa-miR-196a*	147991	DPY19L3	-0.15	http://www.microrna.org/microrna/getMrna.do?gene=147991&matureName=hsa-miR-196a*&organism=9606
hsa-miR-196a-3p	MIMAT0004562	hsa-miR-196a*	146057	TTBK2	-0.35	http://www.microrna.org/microrna/getMrna.do?gene=146057&matureName=hsa-miR-196a*&organism=9606
hsa-miR-196a-3p	MIMAT0004562	hsa-miR-196a*	55149	MTPAP	-0.14	http://www.microrna.org/microrna/getMrna.do?gene=55149&matureName=hsa-miR-196a*&organism=9606
hsa-miR-196a-3p	MIMAT0004562	hsa-miR-196a*	11163	NUDT4	-0.41	http://www.microrna.org/microrna/getMrna.do?gene=11163&matureName=hsa-miR-196a*&organism=9606
hsa-miR-196a-3p	MIMAT0004562	hsa-miR-196a*	9830	TRIM14	-0.44	http://www.microrna.org/microrna/getMrna.do?gene=9830&matureName=hsa-miR-196a*&organism=9606
hsa-miR-196a-3p	MIMAT0004562	hsa-miR-196a*	1822	ATN1	-0.81	http://www.microrna.org/microrna/getMrna.do?gene=1822&matureName=hsa-miR-196a*&organism=9606
hsa-miR-196a-3p	MIMAT0004562	hsa-miR-196a*	6789	STK4	-0.16	http://www.microrna.org/microrna/getMrna.do?gene=6789&matureName=hsa-miR-196a*&organism=9606
hsa-miR-196a-3p	MIMAT0004562	hsa-miR-196a*	222537	HS3ST5	-0.73	http://www.microrna.org/microrna/getMrna.do?gene=222537&matureName=hsa-miR-196a*&organism=9606
hsa-miR-196a-3p	MIMAT0004562	hsa-miR-196a*	84152	PPP1R1B	-0.51	http://www.microrna.org/microrna/getMrna.do?gene=84152&matureName=hsa-miR-196a*&organism=9606
hsa-miR-196a-3p	MIMAT0004562	hsa-miR-196a*	10492	SYNCRIP	-0.61	http://www.microrna.org/microrna/getMrna.do?gene=10492&matureName=hsa-miR-196a*&organism=9606
hsa-miR-196a-3p	MIMAT0004562	hsa-miR-196a*	54620	FBXL19	-0.31	http://www.microrna.org/microrna/getMrna.do?gene=54620&matureName=hsa-miR-196a*&organism=9606
hsa-miR-196a-3p	MIMAT0004562	hsa-miR-196a*	254272	TBC1D28	-0.12	http://www.microrna.org/microrna/getMrna.do?gene=254272&matureName=hsa-miR-196a*&organism=9606
hsa-miR-196a-3p	MIMAT0004562	hsa-miR-196a*	1017	CDK2	-0.82	http://www.microrna.org/microrna/getMrna.do?gene=1017&matureName=hsa-miR-196a*&organism=9606
hsa-miR-196a-3p	MIMAT0004562	hsa-miR-196a*	340074	LOC340074	-0.12	http://www.microrna.org/microrna/getMrna.do?gene=340074&matureName=hsa-miR-196a*&organism=9606
hsa-miR-196a-3p	MIMAT0004562	hsa-miR-196a*	340074	LOC340074	-0.14	http://www.microrna.org/microrna/getMrna.do?gene=340074&matureName=hsa-miR-196a*&organism=9606
hsa-miR-196a-3p	MIMAT0004562	hsa-miR-196a*	2643	GCH1	-0.46	http://www.microrna.org/microrna/getMrna.do?gene=2643&matureName=hsa-miR-196a*&organism=9606
hsa-miR-196a-3p	MIMAT0004562	hsa-miR-196a*	338739	LOC338739	-0.13	http://www.microrna.org/microrna/getMrna.do?gene=338739&matureName=hsa-miR-196a*&organism=9606
hsa-miR-196a-3p	MIMAT0004562	hsa-miR-196a*	338739	LOC338739	-0.15	http://www.microrna.org/microrna/getMrna.do?gene=338739&matureName=hsa-miR-196a*&organism=9606
hsa-miR-196a-3p	MIMAT0004562	hsa-miR-196a*	285966	FAM115C	-0.28	http://www.microrna.org/microrna/getMrna.do?gene=285966&matureName=hsa-miR-196a*&organism=9606
hsa-miR-196a-3p	MIMAT0004562	hsa-miR-196a*	8754	ADAM9	-0.1	http://www.microrna.org/microrna/getMrna.do?gene=8754&matureName=hsa-miR-196a*&organism=9606
hsa-miR-196a-3p	MIMAT0004562	hsa-miR-196a*	10156	RASA4	-0.15	http://www.microrna.org/microrna/getMrna.do?gene=10156&matureName=hsa-miR-196a*&organism=9606
hsa-miR-196a-3p	MIMAT0004562	hsa-miR-196a*	83937	RASSF4	-0.54	http://www.microrna.org/microrna/getMrna.do?gene=83937&matureName=hsa-miR-196a*&organism=9606
hsa-miR-196a-3p	MIMAT0004562	hsa-miR-196a*	56658	TRIM39	-1.03	http://www.microrna.org/microrna/getMrna.do?gene=56658&matureName=hsa-miR-196a*&organism=9606
hsa-miR-196a-3p	MIMAT0004562	hsa-miR-196a*	130399	ACVR1C	-0.11	http://www.microrna.org/microrna/getMrna.do?gene=130399&matureName=hsa-miR-196a*&organism=9606
hsa-miR-196a-3p	MIMAT0004562	hsa-miR-196a*	54457	TAF7L	-0.22	http://www.microrna.org/microrna/getMrna.do?gene=54457&matureName=hsa-miR-196a*&organism=9606
hsa-miR-196a-3p	MIMAT0004562	hsa-miR-196a*	205327	C2orf69	-0.92	http://www.microrna.org/microrna/getMrna.do?gene=205327&matureName=hsa-miR-196a*&organism=9606
hsa-miR-196a-3p	MIMAT0004562	hsa-miR-196a*	148213	ZNF681	-0.13	http://www.microrna.org/microrna/getMrna.do?gene=148213&matureName=hsa-miR-196a*&organism=9606
hsa-miR-196a-3p	MIMAT0004562	hsa-miR-196a*	10777	ARPP21	-1.09	http://www.microrna.org/microrna/getMrna.do?gene=10777&matureName=hsa-miR-196a*&organism=9606
hsa-miR-196a-3p	MIMAT0004562	hsa-miR-196a*	10613	ERLIN1	-0.14	http://www.microrna.org/microrna/getMrna.do?gene=10613&matureName=hsa-miR-196a*&organism=9606
hsa-miR-196a-3p	MIMAT0004562	hsa-miR-196a*	55051	C14orf102	-0.12	http://www.microrna.org/microrna/getMrna.do?gene=55051&matureName=hsa-miR-196a*&organism=9606
hsa-miR-196a-3p	MIMAT0004562	hsa-miR-196a*	100131213	C10orf41	-1.22	http://www.microrna.org/microrna/getMrna.do?gene=100131213&matureName=hsa-miR-196a*&organism=9606
hsa-miR-196a-3p	MIMAT0004562	hsa-miR-196a*	3798	KIF5A	-0.94	http://www.microrna.org/microrna/getMrna.do?gene=3798&matureName=hsa-miR-196a*&organism=9606
hsa-miR-196a-3p	MIMAT0004562	hsa-miR-196a*	23390	ZDHHC17	-0.11	http://www.microrna.org/microrna/getMrna.do?gene=23390&matureName=hsa-miR-196a*&organism=9606
hsa-miR-196a-3p	MIMAT0004562	hsa-miR-196a*	2932	GSK3B	-0.17	http://www.microrna.org/microrna/getMrna.do?gene=2932&matureName=hsa-miR-196a*&organism=9606
hsa-miR-196a-3p	MIMAT0004562	hsa-miR-196a*	3111	HLA-DOA	-0.51	http://www.microrna.org/microrna/getMrna.do?gene=3111&matureName=hsa-miR-196a*&organism=9606
hsa-miR-196a-3p	MIMAT0004562	hsa-miR-196a*	11135	CDC42EP1	-0.28	http://www.microrna.org/microrna/getMrna.do?gene=11135&matureName=hsa-miR-196a*&organism=9606
hsa-miR-196a-3p	MIMAT0004562	hsa-miR-196a*	81930	KIF18A	-1.28	http://www.microrna.org/microrna/getMrna.do?gene=81930&matureName=hsa-miR-196a*&organism=9606
hsa-miR-196a-3p	MIMAT0004562	hsa-miR-196a*	4850	CNOT4	-0.18	http://www.microrna.org/microrna/getMrna.do?gene=4850&matureName=hsa-miR-196a*&organism=9606
hsa-miR-196a-3p	MIMAT0004562	hsa-miR-196a*	653786	LOC653786	-0.19	http://www.microrna.org/microrna/getMrna.do?gene=653786&matureName=hsa-miR-196a*&organism=9606
hsa-miR-196a-3p	MIMAT0004562	hsa-miR-196a*	11228	RASSF8	-0.21	http://www.microrna.org/microrna/getMrna.do?gene=11228&matureName=hsa-miR-196a*&organism=9606
hsa-miR-196a-3p	MIMAT0004562	hsa-miR-196a*	347902	AMIGO2	-1.26	http://www.microrna.org/microrna/getMrna.do?gene=347902&matureName=hsa-miR-196a*&organism=9606
hsa-miR-196a-3p	MIMAT0004562	hsa-miR-196a*	339184	CCDC144NL	-0.96	http://www.microrna.org/microrna/getMrna.do?gene=339184&matureName=hsa-miR-196a*&organism=9606
hsa-miR-196a-3p	MIMAT0004562	hsa-miR-196a*	339184	CCDC144NL	-0.77	http://www.microrna.org/microrna/getMrna.do?gene=339184&matureName=hsa-miR-196a*&organism=9606
hsa-miR-196a-3p	MIMAT0004562	hsa-miR-196a*	339184	CCDC144NL	-0.1	http://www.microrna.org/microrna/getMrna.do?gene=339184&matureName=hsa-miR-196a*&organism=9606
hsa-miR-196a-3p	MIMAT0004562	hsa-miR-196a*	55177	FAM82A2	-0.18	http://www.microrna.org/microrna/getMrna.do?gene=55177&matureName=hsa-miR-196a*&organism=9606
hsa-miR-196a-3p	MIMAT0004562	hsa-miR-196a*	57551	TAOK1	-0.31	http://www.microrna.org/microrna/getMrna.do?gene=57551&matureName=hsa-miR-196a*&organism=9606
hsa-miR-196a-3p	MIMAT0004562	hsa-miR-196a*	57551	TAOK1	-0.16	http://www.microrna.org/microrna/getMrna.do?gene=57551&matureName=hsa-miR-196a*&organism=9606
hsa-miR-196a-3p	MIMAT0004562	hsa-miR-196a*	57551	TAOK1	-0.15	http://www.microrna.org/microrna/getMrna.do?gene=57551&matureName=hsa-miR-196a*&organism=9606
hsa-miR-196a-3p	MIMAT0004562	hsa-miR-196a*	3754	KCNF1	-0.16	http://www.microrna.org/microrna/getMrna.do?gene=3754&matureName=hsa-miR-196a*&organism=9606
hsa-miR-196a-3p	MIMAT0004562	hsa-miR-196a*	54033	RBM11	-0.67	http://www.microrna.org/microrna/getMrna.do?gene=54033&matureName=hsa-miR-196a*&organism=9606
hsa-miR-196a-3p	MIMAT0004562	hsa-miR-196a*	79776	ZFHX4	-0.1	http://www.microrna.org/microrna/getMrna.do?gene=79776&matureName=hsa-miR-196a*&organism=9606
hsa-miR-196a-3p	MIMAT0004562	hsa-miR-196a*	5217	PFN2	-0.14	http://www.microrna.org/microrna/getMrna.do?gene=5217&matureName=hsa-miR-196a*&organism=9606
hsa-miR-196a-3p	MIMAT0004562	hsa-miR-196a*	5217	PFN2	-0.14	http://www.microrna.org/microrna/getMrna.do?gene=5217&matureName=hsa-miR-196a*&organism=9606
hsa-miR-196a-3p	MIMAT0004562	hsa-miR-196a*	5217	PFN2	-1.07	http://www.microrna.org/microrna/getMrna.do?gene=5217&matureName=hsa-miR-196a*&organism=9606
hsa-miR-196a-3p	MIMAT0004562	hsa-miR-196a*	4883	NPR3	-0.39	http://www.microrna.org/microrna/getMrna.do?gene=4883&matureName=hsa-miR-196a*&organism=9606
hsa-miR-196a-3p	MIMAT0004562	hsa-miR-196a*	780776	FAM18A	-0.17	http://www.microrna.org/microrna/getMrna.do?gene=780776&matureName=hsa-miR-196a*&organism=9606
hsa-miR-196a-3p	MIMAT0004562	hsa-miR-196a*	440561	PRAMEF6	-0.16	http://www.microrna.org/microrna/getMrna.do?gene=440561&matureName=hsa-miR-196a*&organism=9606
hsa-miR-196a-3p	MIMAT0004562	hsa-miR-196a*	91452	ACBD5	-0.11	http://www.microrna.org/microrna/getMrna.do?gene=91452&matureName=hsa-miR-196a*&organism=9606
hsa-miR-196a-3p	MIMAT0004562	hsa-miR-196a*	91452	ACBD5	-0.66	http://www.microrna.org/microrna/getMrna.do?gene=91452&matureName=hsa-miR-196a*&organism=9606
hsa-miR-196a-3p	MIMAT0004562	hsa-miR-196a*	91452	ACBD5	-0.38	http://www.microrna.org/microrna/getMrna.do?gene=91452&matureName=hsa-miR-196a*&organism=9606
hsa-miR-196a-3p	MIMAT0004562	hsa-miR-196a*	987	LRBA	-0.17	http://www.microrna.org/microrna/getMrna.do?gene=987&matureName=hsa-miR-196a*&organism=9606
hsa-miR-196a-3p	MIMAT0004562	hsa-miR-196a*	987	LRBA	-0.16	http://www.microrna.org/microrna/getMrna.do?gene=987&matureName=hsa-miR-196a*&organism=9606
hsa-miR-196a-3p	MIMAT0004562	hsa-miR-196a*	100302526	FAM41AY2	-0.13	http://www.microrna.org/microrna/getMrna.do?gene=100302526&matureName=hsa-miR-196a*&organism=9606
hsa-miR-196a-3p	MIMAT0004562	hsa-miR-196a*	100302526	FAM41AY2	-0.2	http://www.microrna.org/microrna/getMrna.do?gene=100302526&matureName=hsa-miR-196a*&organism=9606
hsa-miR-196a-3p	MIMAT0004562	hsa-miR-196a*	5980	REV3L	-0.13	http://www.microrna.org/microrna/getMrna.do?gene=5980&matureName=hsa-miR-196a*&organism=9606
hsa-miR-196a-3p	MIMAT0004562	hsa-miR-196a*	219995	MS4A15	-0.61	http://www.microrna.org/microrna/getMrna.do?gene=219995&matureName=hsa-miR-196a*&organism=9606
hsa-miR-196a-3p	MIMAT0004562	hsa-miR-196a*	79670	ZCCHC6	-1.05	http://www.microrna.org/microrna/getMrna.do?gene=79670&matureName=hsa-miR-196a*&organism=9606
hsa-miR-196a-3p	MIMAT0004562	hsa-miR-196a*	79893	GGNBP2	-0.5	http://www.microrna.org/microrna/getMrna.do?gene=79893&matureName=hsa-miR-196a*&organism=9606
hsa-miR-196a-3p	MIMAT0004562	hsa-miR-196a*	90196	SYS1	-0.26	http://www.microrna.org/microrna/getMrna.do?gene=90196&matureName=hsa-miR-196a*&organism=9606
hsa-miR-196a-3p	MIMAT0004562	hsa-miR-196a*	284403	WDR62	-0.11	http://www.microrna.org/microrna/getMrna.do?gene=284403&matureName=hsa-miR-196a*&organism=9606
hsa-miR-196a-3p	MIMAT0004562	hsa-miR-196a*	9794	MAML1	-0.13	http://www.microrna.org/microrna/getMrna.do?gene=9794&matureName=hsa-miR-196a*&organism=9606
hsa-miR-196a-3p	MIMAT0004562	hsa-miR-196a*	93377	OPALIN	-0.49	http://www.microrna.org/microrna/getMrna.do?gene=93377&matureName=hsa-miR-196a*&organism=9606
hsa-miR-196a-3p	MIMAT0004562	hsa-miR-196a*	10658	CELF1	-0.1	http://www.microrna.org/microrna/getMrna.do?gene=10658&matureName=hsa-miR-196a*&organism=9606
hsa-miR-196a-3p	MIMAT0004562	hsa-miR-196a*	65986	ZBTB10	-0.88	http://www.microrna.org/microrna/getMrna.do?gene=65986&matureName=hsa-miR-196a*&organism=9606
hsa-miR-196a-3p	MIMAT0004562	hsa-miR-196a*	3098	HK1	-1.31	http://www.microrna.org/microrna/getMrna.do?gene=3098&matureName=hsa-miR-196a*&organism=9606
hsa-miR-196a-3p	MIMAT0004562	hsa-miR-196a*	152992	C4orf23	-0.26	http://www.microrna.org/microrna/getMrna.do?gene=152992&matureName=hsa-miR-196a*&organism=9606
hsa-miR-196a-3p	MIMAT0004562	hsa-miR-196a*	142679	DUSP19	-0.2	http://www.microrna.org/microrna/getMrna.do?gene=142679&matureName=hsa-miR-196a*&organism=9606
hsa-miR-196a-3p	MIMAT0004562	hsa-miR-196a*	260294	NSUN5P2	-0.12	http://www.microrna.org/microrna/getMrna.do?gene=260294&matureName=hsa-miR-196a*&organism=9606
hsa-miR-196a-3p	MIMAT0004562	hsa-miR-196a*	8760	CDS2	-0.13	http://www.microrna.org/microrna/getMrna.do?gene=8760&matureName=hsa-miR-196a*&organism=9606
hsa-miR-196a-3p	MIMAT0004562	hsa-miR-196a*	1789	DNMT3B	-0.22	http://www.microrna.org/microrna/getMrna.do?gene=1789&matureName=hsa-miR-196a*&organism=9606
hsa-miR-196a-3p	MIMAT0004562	hsa-miR-196a*	81578	COL21A1	-1.11	http://www.microrna.org/microrna/getMrna.do?gene=81578&matureName=hsa-miR-196a*&organism=9606
hsa-miR-196a-3p	MIMAT0004562	hsa-miR-196a*	57834	CYP4F11	-0.16	http://www.microrna.org/microrna/getMrna.do?gene=57834&matureName=hsa-miR-196a*&organism=9606
hsa-miR-196a-3p	MIMAT0004562	hsa-miR-196a*	11189	CELF3	-1.07	http://www.microrna.org/microrna/getMrna.do?gene=11189&matureName=hsa-miR-196a*&organism=9606
hsa-miR-196a-3p	MIMAT0004562	hsa-miR-196a*	154661	RUNDC3B	-0.62	http://www.microrna.org/microrna/getMrna.do?gene=154661&matureName=hsa-miR-196a*&organism=9606
hsa-miR-196a-3p	MIMAT0004562	hsa-miR-196a*	23035	PHLPP2	-0.23	http://www.microrna.org/microrna/getMrna.do?gene=23035&matureName=hsa-miR-196a*&organism=9606
hsa-miR-196a-3p	MIMAT0004562	hsa-miR-196a*	3164	NR4A1	-0.22	http://www.microrna.org/microrna/getMrna.do?gene=3164&matureName=hsa-miR-196a*&organism=9606
hsa-miR-196a-3p	MIMAT0004562	hsa-miR-196a*	29883	CNOT7	-0.92	http://www.microrna.org/microrna/getMrna.do?gene=29883&matureName=hsa-miR-196a*&organism=9606
hsa-miR-196a-3p	MIMAT0004562	hsa-miR-196a*	84886	C1orf198	-0.15	http://www.microrna.org/microrna/getMrna.do?gene=84886&matureName=hsa-miR-196a*&organism=9606
hsa-miR-196a-3p	MIMAT0004562	hsa-miR-196a*	6605	SMARCE1	-1.09	http://www.microrna.org/microrna/getMrna.do?gene=6605&matureName=hsa-miR-196a*&organism=9606
hsa-miR-196a-3p	MIMAT0004562	hsa-miR-196a*	56895	AGPAT4	-0.64	http://www.microrna.org/microrna/getMrna.do?gene=56895&matureName=hsa-miR-196a*&organism=9606
hsa-miR-196a-3p	MIMAT0004562	hsa-miR-196a*	10079	ATP9A	-0.15	http://www.microrna.org/microrna/getMrna.do?gene=10079&matureName=hsa-miR-196a*&organism=9606
hsa-miR-196a-3p	MIMAT0004562	hsa-miR-196a*	947	CD34	-0.53	http://www.microrna.org/microrna/getMrna.do?gene=947&matureName=hsa-miR-196a*&organism=9606
hsa-miR-196a-3p	MIMAT0004562	hsa-miR-196a*	401137	C4orf40	-0.23	http://www.microrna.org/microrna/getMrna.do?gene=401137&matureName=hsa-miR-196a*&organism=9606
hsa-miR-196a-3p	MIMAT0004562	hsa-miR-196a*	6427	SFRS2	-0.4	http://www.microrna.org/microrna/getMrna.do?gene=6427&matureName=hsa-miR-196a*&organism=9606
hsa-miR-196a-3p	MIMAT0004562	hsa-miR-196a*	286828	CSN1S2A	-0.12	http://www.microrna.org/microrna/getMrna.do?gene=286828&matureName=hsa-miR-196a*&organism=9606
hsa-miR-196a-3p	MIMAT0004562	hsa-miR-196a*	7018	TF	-0.61	http://www.microrna.org/microrna/getMrna.do?gene=7018&matureName=hsa-miR-196a*&organism=9606
hsa-miR-196a-3p	MIMAT0004562	hsa-miR-196a*	5087	PBX1	-0.18	http://www.microrna.org/microrna/getMrna.do?gene=5087&matureName=hsa-miR-196a*&organism=9606
hsa-miR-196a-3p	MIMAT0004562	hsa-miR-196a*	55814	BDP1	-0.23	http://www.microrna.org/microrna/getMrna.do?gene=55814&matureName=hsa-miR-196a*&organism=9606
hsa-miR-196a-3p	MIMAT0004562	hsa-miR-196a*	7529	YWHAB	-0.22	http://www.microrna.org/microrna/getMrna.do?gene=7529&matureName=hsa-miR-196a*&organism=9606
hsa-miR-196a-3p	MIMAT0004562	hsa-miR-196a*	121441	NEDD1	-0.15	http://www.microrna.org/microrna/getMrna.do?gene=121441&matureName=hsa-miR-196a*&organism=9606
hsa-miR-196a-3p	MIMAT0004562	hsa-miR-196a*	23191	CYFIP1	-1.06	http://www.microrna.org/microrna/getMrna.do?gene=23191&matureName=hsa-miR-196a*&organism=9606
hsa-miR-196a-3p	MIMAT0004562	hsa-miR-196a*	51077	FCF1	-0.89	http://www.microrna.org/microrna/getMrna.do?gene=51077&matureName=hsa-miR-196a*&organism=9606
hsa-miR-196a-3p	MIMAT0004562	hsa-miR-196a*	4776	NFATC4	-0.33	http://www.microrna.org/microrna/getMrna.do?gene=4776&matureName=hsa-miR-196a*&organism=9606
hsa-miR-196a-3p	MIMAT0004562	hsa-miR-196a*	10718	NRG3	-0.34	http://www.microrna.org/microrna/getMrna.do?gene=10718&matureName=hsa-miR-196a*&organism=9606
hsa-miR-196a-3p	MIMAT0004562	hsa-miR-196a*	57146	TMEM159	-0.26	http://www.microrna.org/microrna/getMrna.do?gene=57146&matureName=hsa-miR-196a*&organism=9606
hsa-miR-196a-3p	MIMAT0004562	hsa-miR-196a*	126536	LOC126536	-0.27	http://www.microrna.org/microrna/getMrna.do?gene=126536&matureName=hsa-miR-196a*&organism=9606
hsa-miR-196a-3p	MIMAT0004562	hsa-miR-196a*	6997	TDGF1	-0.16	http://www.microrna.org/microrna/getMrna.do?gene=6997&matureName=hsa-miR-196a*&organism=9606
hsa-miR-196a-3p	MIMAT0004562	hsa-miR-196a*	5195	PEX14	-0.12	http://www.microrna.org/microrna/getMrna.do?gene=5195&matureName=hsa-miR-196a*&organism=9606
hsa-miR-196a-3p	MIMAT0004562	hsa-miR-196a*	10971	YWHAQ	-0.11	http://www.microrna.org/microrna/getMrna.do?gene=10971&matureName=hsa-miR-196a*&organism=9606
hsa-miR-196a-3p	MIMAT0004562	hsa-miR-196a*	10971	YWHAQ	-0.1	http://www.microrna.org/microrna/getMrna.do?gene=10971&matureName=hsa-miR-196a*&organism=9606
hsa-miR-196a-3p	MIMAT0004562	hsa-miR-196a*	4747	NEFL	-0.44	http://www.microrna.org/microrna/getMrna.do?gene=4747&matureName=hsa-miR-196a*&organism=9606
hsa-miR-196a-3p	MIMAT0004562	hsa-miR-196a*	4747	NEFL	-0.36	http://www.microrna.org/microrna/getMrna.do?gene=4747&matureName=hsa-miR-196a*&organism=9606
hsa-miR-196a-3p	MIMAT0004562	hsa-miR-196a*	81037	CLPTM1L	-0.96	http://www.microrna.org/microrna/getMrna.do?gene=81037&matureName=hsa-miR-196a*&organism=9606
hsa-miR-196a-3p	MIMAT0004562	hsa-miR-196a*	7439	BEST1	-0.33	http://www.microrna.org/microrna/getMrna.do?gene=7439&matureName=hsa-miR-196a*&organism=9606
hsa-miR-196a-3p	MIMAT0004562	hsa-miR-196a*	253724	LOC253724	-0.1	http://www.microrna.org/microrna/getMrna.do?gene=253724&matureName=hsa-miR-196a*&organism=9606
hsa-miR-196a-3p	MIMAT0004562	hsa-miR-196a*	64065	PERP	-0.19	http://www.microrna.org/microrna/getMrna.do?gene=64065&matureName=hsa-miR-196a*&organism=9606
hsa-miR-196a-3p	MIMAT0004562	hsa-miR-196a*	29843	SENP1	-0.39	http://www.microrna.org/microrna/getMrna.do?gene=29843&matureName=hsa-miR-196a*&organism=9606
hsa-miR-196a-3p	MIMAT0004562	hsa-miR-196a*	653129	PTPN20A	-0.58	http://www.microrna.org/microrna/getMrna.do?gene=653129&matureName=hsa-miR-196a*&organism=9606
hsa-miR-196a-3p	MIMAT0004562	hsa-miR-196a*	55144	LRRC8D	-0.31	http://www.microrna.org/microrna/getMrna.do?gene=55144&matureName=hsa-miR-196a*&organism=9606
hsa-miR-196a-3p	MIMAT0004562	hsa-miR-196a*	9374	PPT2	-0.2	http://www.microrna.org/microrna/getMrna.do?gene=9374&matureName=hsa-miR-196a*&organism=9606
hsa-miR-196a-3p	MIMAT0004562	hsa-miR-196a*	284361	C19orf63	-0.2	http://www.microrna.org/microrna/getMrna.do?gene=284361&matureName=hsa-miR-196a*&organism=9606
hsa-miR-196a-3p	MIMAT0004562	hsa-miR-196a*	127795	C1orf87	-1.04	http://www.microrna.org/microrna/getMrna.do?gene=127795&matureName=hsa-miR-196a*&organism=9606
hsa-miR-196a-3p	MIMAT0004562	hsa-miR-196a*	157657	C8orf37	-1.02	http://www.microrna.org/microrna/getMrna.do?gene=157657&matureName=hsa-miR-196a*&organism=9606
hsa-miR-196a-3p	MIMAT0004562	hsa-miR-196a*	440187	C14orf41	-0.11	http://www.microrna.org/microrna/getMrna.do?gene=440187&matureName=hsa-miR-196a*&organism=9606
hsa-miR-196a-3p	MIMAT0004562	hsa-miR-196a*	57176	VARS2	-0.12	http://www.microrna.org/microrna/getMrna.do?gene=57176&matureName=hsa-miR-196a*&organism=9606
hsa-miR-196a-3p	MIMAT0004562	hsa-miR-196a*	57708	MIER1	-1.19	http://www.microrna.org/microrna/getMrna.do?gene=57708&matureName=hsa-miR-196a*&organism=9606
hsa-miR-196a-3p	MIMAT0004562	hsa-miR-196a*	5352	PLOD2	-1	http://www.microrna.org/microrna/getMrna.do?gene=5352&matureName=hsa-miR-196a*&organism=9606
hsa-miR-196a-3p	MIMAT0004562	hsa-miR-196a*	1004	CDH6	-0.46	http://www.microrna.org/microrna/getMrna.do?gene=1004&matureName=hsa-miR-196a*&organism=9606
hsa-miR-196a-3p	MIMAT0004562	hsa-miR-196a*	64699	TMPRSS3	-0.12	http://www.microrna.org/microrna/getMrna.do?gene=64699&matureName=hsa-miR-196a*&organism=9606
hsa-miR-196a-3p	MIMAT0004562	hsa-miR-196a*	6855	SYP	-0.64	http://www.microrna.org/microrna/getMrna.do?gene=6855&matureName=hsa-miR-196a*&organism=9606
hsa-miR-196a-3p	MIMAT0004562	hsa-miR-196a*	79876	UBA5	-0.81	http://www.microrna.org/microrna/getMrna.do?gene=79876&matureName=hsa-miR-196a*&organism=9606
hsa-miR-196a-3p	MIMAT0004562	hsa-miR-196a*	8446	DUSP11	-0.94	http://www.microrna.org/microrna/getMrna.do?gene=8446&matureName=hsa-miR-196a*&organism=9606
hsa-miR-196a-3p	MIMAT0004562	hsa-miR-196a*	57826	RAP2C	-1.27	http://www.microrna.org/microrna/getMrna.do?gene=57826&matureName=hsa-miR-196a*&organism=9606
hsa-miR-196a-3p	MIMAT0004562	hsa-miR-196a*	57826	RAP2C	-0.11	http://www.microrna.org/microrna/getMrna.do?gene=57826&matureName=hsa-miR-196a*&organism=9606
hsa-miR-196a-3p	MIMAT0004562	hsa-miR-196a*	8688	KRT37	-0.18	http://www.microrna.org/microrna/getMrna.do?gene=8688&matureName=hsa-miR-196a*&organism=9606
hsa-miR-196a-3p	MIMAT0004562	hsa-miR-196a*	55197	RPRD1A	-0.81	http://www.microrna.org/microrna/getMrna.do?gene=55197&matureName=hsa-miR-196a*&organism=9606
hsa-miR-196a-3p	MIMAT0004562	hsa-miR-196a*	419	ART3	-0.14	http://www.microrna.org/microrna/getMrna.do?gene=419&matureName=hsa-miR-196a*&organism=9606
hsa-miR-196a-3p	MIMAT0004562	hsa-miR-196a*	25875	LETMD1	-0.17	http://www.microrna.org/microrna/getMrna.do?gene=25875&matureName=hsa-miR-196a*&organism=9606
hsa-miR-196a-3p	MIMAT0004562	hsa-miR-196a*	8828	NRP2	-0.71	http://www.microrna.org/microrna/getMrna.do?gene=8828&matureName=hsa-miR-196a*&organism=9606
hsa-miR-196a-3p	MIMAT0004562	hsa-miR-196a*	83932	C1orf124	-0.32	http://www.microrna.org/microrna/getMrna.do?gene=83932&matureName=hsa-miR-196a*&organism=9606
hsa-miR-196a-3p	MIMAT0004562	hsa-miR-196a*	79829	NAA40	-0.13	http://www.microrna.org/microrna/getMrna.do?gene=79829&matureName=hsa-miR-196a*&organism=9606
hsa-miR-196a-3p	MIMAT0004562	hsa-miR-196a*	7803	PTP4A1	-0.68	http://www.microrna.org/microrna/getMrna.do?gene=7803&matureName=hsa-miR-196a*&organism=9606
hsa-miR-196a-3p	MIMAT0004562	hsa-miR-196a*	9230	RAB11B	-0.1	http://www.microrna.org/microrna/getMrna.do?gene=9230&matureName=hsa-miR-196a*&organism=9606
hsa-miR-196a-3p	MIMAT0004562	hsa-miR-196a*	119710	C11orf74	-0.18	http://www.microrna.org/microrna/getMrna.do?gene=119710&matureName=hsa-miR-196a*&organism=9606
hsa-miR-196a-3p	MIMAT0004562	hsa-miR-196a*	2547	XRCC6	-0.47	http://www.microrna.org/microrna/getMrna.do?gene=2547&matureName=hsa-miR-196a*&organism=9606
hsa-miR-196a-3p	MIMAT0004562	hsa-miR-196a*	6945	MLX	-0.12	http://www.microrna.org/microrna/getMrna.do?gene=6945&matureName=hsa-miR-196a*&organism=9606
hsa-miR-196a-3p	MIMAT0004562	hsa-miR-196a*	8663	EIF3C	-0.97	http://www.microrna.org/microrna/getMrna.do?gene=8663&matureName=hsa-miR-196a*&organism=9606
hsa-miR-196a-3p	MIMAT0004562	hsa-miR-196a*	2618	GART	-0.41	http://www.microrna.org/microrna/getMrna.do?gene=2618&matureName=hsa-miR-196a*&organism=9606
hsa-miR-196a-3p	MIMAT0004562	hsa-miR-196a*	54875	CNTLN	-0.12	http://www.microrna.org/microrna/getMrna.do?gene=54875&matureName=hsa-miR-196a*&organism=9606
hsa-miR-196a-3p	MIMAT0004562	hsa-miR-196a*	146183	OTOA	-0.94	http://www.microrna.org/microrna/getMrna.do?gene=146183&matureName=hsa-miR-196a*&organism=9606
hsa-miR-196a-3p	MIMAT0004562	hsa-miR-196a*	348303	SELV	-0.97	http://www.microrna.org/microrna/getMrna.do?gene=348303&matureName=hsa-miR-196a*&organism=9606
hsa-miR-196a-3p	MIMAT0004562	hsa-miR-196a*	100131434	LOC100131434	-0.29	http://www.microrna.org/microrna/getMrna.do?gene=100131434&matureName=hsa-miR-196a*&organism=9606
hsa-miR-196a-3p	MIMAT0004562	hsa-miR-196a*	51441	YTHDF2	-1.21	http://www.microrna.org/microrna/getMrna.do?gene=51441&matureName=hsa-miR-196a*&organism=9606
hsa-miR-196a-3p	MIMAT0004562	hsa-miR-196a*	54893	MTMR10	-0.47	http://www.microrna.org/microrna/getMrna.do?gene=54893&matureName=hsa-miR-196a*&organism=9606
hsa-miR-196a-3p	MIMAT0004562	hsa-miR-196a*	83877	TM2D2	-0.18	http://www.microrna.org/microrna/getMrna.do?gene=83877&matureName=hsa-miR-196a*&organism=9606
hsa-miR-196a-3p	MIMAT0004562	hsa-miR-196a*	57148	RALGAPB	-1.15	http://www.microrna.org/microrna/getMrna.do?gene=57148&matureName=hsa-miR-196a*&organism=9606
hsa-miR-196a-3p	MIMAT0004562	hsa-miR-196a*	1588	CYP19A1	-1.22	http://www.microrna.org/microrna/getMrna.do?gene=1588&matureName=hsa-miR-196a*&organism=9606
hsa-miR-196a-3p	MIMAT0004562	hsa-miR-196a*	256691	MAMDC2	-0.15	http://www.microrna.org/microrna/getMrna.do?gene=256691&matureName=hsa-miR-196a*&organism=9606
hsa-miR-196a-3p	MIMAT0004562	hsa-miR-196a*	55218	EXD2	-0.44	http://www.microrna.org/microrna/getMrna.do?gene=55218&matureName=hsa-miR-196a*&organism=9606
hsa-miR-196a-3p	MIMAT0004562	hsa-miR-196a*	7424	VEGFC	-0.47	http://www.microrna.org/microrna/getMrna.do?gene=7424&matureName=hsa-miR-196a*&organism=9606
hsa-miR-196a-3p	MIMAT0004562	hsa-miR-196a*	57620	STIM2	-1.05	http://www.microrna.org/microrna/getMrna.do?gene=57620&matureName=hsa-miR-196a*&organism=9606
hsa-miR-196a-3p	MIMAT0004562	hsa-miR-196a*	3638	INSIG1	-0.22	http://www.microrna.org/microrna/getMrna.do?gene=3638&matureName=hsa-miR-196a*&organism=9606
hsa-miR-196a-3p	MIMAT0004562	hsa-miR-196a*	28973	MRPS18B	-0.82	http://www.microrna.org/microrna/getMrna.do?gene=28973&matureName=hsa-miR-196a*&organism=9606
hsa-miR-196a-3p	MIMAT0004562	hsa-miR-196a*	80128	TRIM46	-0.21	http://www.microrna.org/microrna/getMrna.do?gene=80128&matureName=hsa-miR-196a*&organism=9606
hsa-miR-196a-3p	MIMAT0004562	hsa-miR-196a*	10659	CELF2	-0.92	http://www.microrna.org/microrna/getMrna.do?gene=10659&matureName=hsa-miR-196a*&organism=9606
hsa-miR-196a-3p	MIMAT0004562	hsa-miR-196a*	376940	ZC3H6	-0.19	http://www.microrna.org/microrna/getMrna.do?gene=376940&matureName=hsa-miR-196a*&organism=9606
hsa-miR-196a-3p	MIMAT0004562	hsa-miR-196a*	203427	SLC25A43	-0.13	http://www.microrna.org/microrna/getMrna.do?gene=203427&matureName=hsa-miR-196a*&organism=9606
hsa-miR-196a-3p	MIMAT0004562	hsa-miR-196a*	6556	SLC11A1	-0.11	http://www.microrna.org/microrna/getMrna.do?gene=6556&matureName=hsa-miR-196a*&organism=9606
hsa-miR-196a-3p	MIMAT0004562	hsa-miR-196a*	22838	RNF44	-0.25	http://www.microrna.org/microrna/getMrna.do?gene=22838&matureName=hsa-miR-196a*&organism=9606
hsa-miR-196a-3p	MIMAT0004562	hsa-miR-196a*	1748	DLX4	-0.66	http://www.microrna.org/microrna/getMrna.do?gene=1748&matureName=hsa-miR-196a*&organism=9606
hsa-miR-196a-3p	MIMAT0004562	hsa-miR-196a*	84777	MGC11082	-0.25	http://www.microrna.org/microrna/getMrna.do?gene=84777&matureName=hsa-miR-196a*&organism=9606
hsa-miR-196a-3p	MIMAT0004562	hsa-miR-196a*	84777	MGC11082	-0.56	http://www.microrna.org/microrna/getMrna.do?gene=84777&matureName=hsa-miR-196a*&organism=9606
hsa-miR-196a-3p	MIMAT0004562	hsa-miR-196a*	5358	PLS3	-0.69	http://www.microrna.org/microrna/getMrna.do?gene=5358&matureName=hsa-miR-196a*&organism=9606
hsa-miR-196a-3p	MIMAT0004562	hsa-miR-196a*	51077	FCF1	-0.91	http://www.microrna.org/microrna/getMrna.do?gene=51077&matureName=hsa-miR-196a*&organism=9606
hsa-miR-196a-3p	MIMAT0004562	hsa-miR-196a*	5327	PLAT	-0.97	http://www.microrna.org/microrna/getMrna.do?gene=5327&matureName=hsa-miR-196a*&organism=9606
hsa-miR-196a-3p	MIMAT0004562	hsa-miR-196a*	64844	MARCH7	-0.1	http://www.microrna.org/microrna/getMrna.do?gene=64844&matureName=hsa-miR-196a*&organism=9606
hsa-miR-196a-3p	MIMAT0004562	hsa-miR-196a*	29035	C16orf72	-0.28	http://www.microrna.org/microrna/getMrna.do?gene=29035&matureName=hsa-miR-196a*&organism=9606
hsa-miR-196a-3p	MIMAT0004562	hsa-miR-196a*	647309	LOC647309	-1	http://www.microrna.org/microrna/getMrna.do?gene=647309&matureName=hsa-miR-196a*&organism=9606
hsa-miR-196a-3p	MIMAT0004562	hsa-miR-196a*	647309	LOC647309	-0.63	http://www.microrna.org/microrna/getMrna.do?gene=647309&matureName=hsa-miR-196a*&organism=9606
hsa-miR-196a-3p	MIMAT0004562	hsa-miR-196a*	3217	HOXB7	-0.13	http://www.microrna.org/microrna/getMrna.do?gene=3217&matureName=hsa-miR-196a*&organism=9606
hsa-miR-196a-3p	MIMAT0004562	hsa-miR-196a*	57587	KIAA1430	-0.7	http://www.microrna.org/microrna/getMrna.do?gene=57587&matureName=hsa-miR-196a*&organism=9606
hsa-miR-196a-3p	MIMAT0004562	hsa-miR-196a*	57587	KIAA1430	-0.69	http://www.microrna.org/microrna/getMrna.do?gene=57587&matureName=hsa-miR-196a*&organism=9606
hsa-miR-196a-3p	MIMAT0004562	hsa-miR-196a*	55266	TMEM19	-0.5	http://www.microrna.org/microrna/getMrna.do?gene=55266&matureName=hsa-miR-196a*&organism=9606
hsa-miR-196a-3p	MIMAT0004562	hsa-miR-196a*	642597	LOC642597	-1.06	http://www.microrna.org/microrna/getMrna.do?gene=642597&matureName=hsa-miR-196a*&organism=9606
hsa-miR-196a-3p	MIMAT0004562	hsa-miR-196a*	23558	WBP2	-0.31	http://www.microrna.org/microrna/getMrna.do?gene=23558&matureName=hsa-miR-196a*&organism=9606
hsa-miR-196a-3p	MIMAT0004562	hsa-miR-196a*	339500	ZNF678	-0.91	http://www.microrna.org/microrna/getMrna.do?gene=339500&matureName=hsa-miR-196a*&organism=9606
hsa-miR-196a-3p	MIMAT0004562	hsa-miR-196a*	26985	AP3M1	-0.85	http://www.microrna.org/microrna/getMrna.do?gene=26985&matureName=hsa-miR-196a*&organism=9606
hsa-miR-196a-3p	MIMAT0004562	hsa-miR-196a*	10449	ACAA2	-1.31	http://www.microrna.org/microrna/getMrna.do?gene=10449&matureName=hsa-miR-196a*&organism=9606
hsa-miR-196a-3p	MIMAT0004562	hsa-miR-196a*	2958	GTF2A2	-1.03	http://www.microrna.org/microrna/getMrna.do?gene=2958&matureName=hsa-miR-196a*&organism=9606
hsa-miR-196a-3p	MIMAT0004562	hsa-miR-196a*	25957	SFRS18	-0.35	http://www.microrna.org/microrna/getMrna.do?gene=25957&matureName=hsa-miR-196a*&organism=9606
hsa-miR-196a-3p	MIMAT0004562	hsa-miR-196a*	118490	ZMYND17	-0.14	http://www.microrna.org/microrna/getMrna.do?gene=118490&matureName=hsa-miR-196a*&organism=9606
hsa-miR-196a-3p	MIMAT0004562	hsa-miR-196a*	65979	PHACTR4	-0.29	http://www.microrna.org/microrna/getMrna.do?gene=65979&matureName=hsa-miR-196a*&organism=9606
hsa-miR-196a-3p	MIMAT0004562	hsa-miR-196a*	11102	RPP14	-0.37	http://www.microrna.org/microrna/getMrna.do?gene=11102&matureName=hsa-miR-196a*&organism=9606
hsa-miR-196a-3p	MIMAT0004562	hsa-miR-196a*	10107	TRIM10	-0.11	http://www.microrna.org/microrna/getMrna.do?gene=10107&matureName=hsa-miR-196a*&organism=9606
hsa-miR-196a-3p	MIMAT0004562	hsa-miR-196a*	100302401	LOC100302401	-0.12	http://www.microrna.org/microrna/getMrna.do?gene=100302401&matureName=hsa-miR-196a*&organism=9606
hsa-miR-196a-3p	MIMAT0004562	hsa-miR-196a*	84181	CHD6	-0.16	http://www.microrna.org/microrna/getMrna.do?gene=84181&matureName=hsa-miR-196a*&organism=9606
hsa-miR-196a-3p	MIMAT0004562	hsa-miR-196a*	6188	RPS3	-0.25	http://www.microrna.org/microrna/getMrna.do?gene=6188&matureName=hsa-miR-196a*&organism=9606
hsa-miR-196a-3p	MIMAT0004562	hsa-miR-196a*	474343	SPIN2B	-1.09	http://www.microrna.org/microrna/getMrna.do?gene=474343&matureName=hsa-miR-196a*&organism=9606
hsa-miR-196a-3p	MIMAT0004562	hsa-miR-196a*	285311	C3orf56	-0.93	http://www.microrna.org/microrna/getMrna.do?gene=285311&matureName=hsa-miR-196a*&organism=9606
hsa-miR-196a-3p	MIMAT0004562	hsa-miR-196a*	653129	PTPN20A	-0.67	http://www.microrna.org/microrna/getMrna.do?gene=653129&matureName=hsa-miR-196a*&organism=9606
hsa-miR-196a-3p	MIMAT0004562	hsa-miR-196a*	493	ATP2B4	-0.23	http://www.microrna.org/microrna/getMrna.do?gene=493&matureName=hsa-miR-196a*&organism=9606
hsa-miR-196a-3p	MIMAT0004562	hsa-miR-196a*	493	ATP2B4	-0.18	http://www.microrna.org/microrna/getMrna.do?gene=493&matureName=hsa-miR-196a*&organism=9606
hsa-miR-196a-3p	MIMAT0004562	hsa-miR-196a*	55186	SLC25A36	-0.7	http://www.microrna.org/microrna/getMrna.do?gene=55186&matureName=hsa-miR-196a*&organism=9606
hsa-miR-196a-3p	MIMAT0004562	hsa-miR-196a*	728716	LOC728716	-0.1	http://www.microrna.org/microrna/getMrna.do?gene=728716&matureName=hsa-miR-196a*&organism=9606
hsa-miR-196a-3p	MIMAT0004562	hsa-miR-196a*	4205	MEF2A	-0.73	http://www.microrna.org/microrna/getMrna.do?gene=4205&matureName=hsa-miR-196a*&organism=9606
hsa-miR-196a-3p	MIMAT0004562	hsa-miR-196a*	4205	MEF2A	-0.77	http://www.microrna.org/microrna/getMrna.do?gene=4205&matureName=hsa-miR-196a*&organism=9606
hsa-miR-196a-3p	MIMAT0004562	hsa-miR-196a*	81556	C15orf44	-0.18	http://www.microrna.org/microrna/getMrna.do?gene=81556&matureName=hsa-miR-196a*&organism=9606
hsa-miR-196a-3p	MIMAT0004562	hsa-miR-196a*	9374	PPT2	-0.22	http://www.microrna.org/microrna/getMrna.do?gene=9374&matureName=hsa-miR-196a*&organism=9606
hsa-miR-196a-3p	MIMAT0004562	hsa-miR-196a*	91351	DDX60L	-0.56	http://www.microrna.org/microrna/getMrna.do?gene=91351&matureName=hsa-miR-196a*&organism=9606
hsa-miR-196a-3p	MIMAT0004562	hsa-miR-196a*	1499	CTNNB1	-0.14	http://www.microrna.org/microrna/getMrna.do?gene=1499&matureName=hsa-miR-196a*&organism=9606
hsa-miR-196a-3p	MIMAT0004562	hsa-miR-196a*	5861	RAB1A	-0.16	http://www.microrna.org/microrna/getMrna.do?gene=5861&matureName=hsa-miR-196a*&organism=9606
hsa-miR-196a-3p	MIMAT0004562	hsa-miR-196a*	9108	MTMR7	-0.23	http://www.microrna.org/microrna/getMrna.do?gene=9108&matureName=hsa-miR-196a*&organism=9606
hsa-miR-196a-3p	MIMAT0004562	hsa-miR-196a*	54733	SLC35F2	-0.17	http://www.microrna.org/microrna/getMrna.do?gene=54733&matureName=hsa-miR-196a*&organism=9606
hsa-miR-196a-3p	MIMAT0004562	hsa-miR-196a*	54733	SLC35F2	-0.16	http://www.microrna.org/microrna/getMrna.do?gene=54733&matureName=hsa-miR-196a*&organism=9606
hsa-miR-196a-3p	MIMAT0004562	hsa-miR-196a*	100133612	LOC100133612	-0.74	http://www.microrna.org/microrna/getMrna.do?gene=100133612&matureName=hsa-miR-196a*&organism=9606
hsa-miR-196a-3p	MIMAT0004562	hsa-miR-196a*	121599	SPIC	-0.16	http://www.microrna.org/microrna/getMrna.do?gene=121599&matureName=hsa-miR-196a*&organism=9606
hsa-miR-196a-3p	MIMAT0004562	hsa-miR-196a*	29931	LOH3CR2A	-0.12	http://www.microrna.org/microrna/getMrna.do?gene=29931&matureName=hsa-miR-196a*&organism=9606
hsa-miR-196a-3p	MIMAT0004562	hsa-miR-196a*	1949	EFNB3	-0.18	http://www.microrna.org/microrna/getMrna.do?gene=1949&matureName=hsa-miR-196a*&organism=9606
hsa-miR-196a-3p	MIMAT0004562	hsa-miR-196a*	140739	UBE2F	-0.52	http://www.microrna.org/microrna/getMrna.do?gene=140739&matureName=hsa-miR-196a*&organism=9606
hsa-miR-196a-3p	MIMAT0004562	hsa-miR-196a*	642	BLMH	-0.55	http://www.microrna.org/microrna/getMrna.do?gene=642&matureName=hsa-miR-196a*&organism=9606
hsa-miR-196a-3p	MIMAT0004562	hsa-miR-196a*	7328	UBE2H	-0.16	http://www.microrna.org/microrna/getMrna.do?gene=7328&matureName=hsa-miR-196a*&organism=9606
hsa-miR-196a-3p	MIMAT0004562	hsa-miR-196a*	28973	MRPS18B	-0.89	http://www.microrna.org/microrna/getMrna.do?gene=28973&matureName=hsa-miR-196a*&organism=9606
hsa-miR-196a-3p	MIMAT0004562	hsa-miR-196a*	10150	MBNL2	-0.11	http://www.microrna.org/microrna/getMrna.do?gene=10150&matureName=hsa-miR-196a*&organism=9606
hsa-miR-196a-3p	MIMAT0004562	hsa-miR-196a*	2244	FGB	-0.19	http://www.microrna.org/microrna/getMrna.do?gene=2244&matureName=hsa-miR-196a*&organism=9606
hsa-miR-196a-3p	MIMAT0004562	hsa-miR-196a*	51582	AZIN1	-0.55	http://www.microrna.org/microrna/getMrna.do?gene=51582&matureName=hsa-miR-196a*&organism=9606
hsa-miR-196a-3p	MIMAT0004562	hsa-miR-196a*	51582	AZIN1	-0.12	http://www.microrna.org/microrna/getMrna.do?gene=51582&matureName=hsa-miR-196a*&organism=9606
hsa-miR-196a-3p	MIMAT0004562	hsa-miR-196a*	9737	GPRASP1	-0.28	http://www.microrna.org/microrna/getMrna.do?gene=9737&matureName=hsa-miR-196a*&organism=9606
hsa-miR-196a-3p	MIMAT0004562	hsa-miR-196a*	3053	SERPIND1	-0.11	http://www.microrna.org/microrna/getMrna.do?gene=3053&matureName=hsa-miR-196a*&organism=9606
hsa-miR-196a-3p	MIMAT0004562	hsa-miR-196a*	688	KLF5	-0.1	http://www.microrna.org/microrna/getMrna.do?gene=688&matureName=hsa-miR-196a*&organism=9606
hsa-miR-196a-3p	MIMAT0004562	hsa-miR-196a*	86614	HSFY1	-0.13	http://www.microrna.org/microrna/getMrna.do?gene=86614&matureName=hsa-miR-196a*&organism=9606
hsa-miR-196a-3p	MIMAT0004562	hsa-miR-196a*	4001	LMNB1	-0.26	http://www.microrna.org/microrna/getMrna.do?gene=4001&matureName=hsa-miR-196a*&organism=9606
hsa-miR-196a-3p	MIMAT0004562	hsa-miR-196a*	23005	MAPKBP1	-0.32	http://www.microrna.org/microrna/getMrna.do?gene=23005&matureName=hsa-miR-196a*&organism=9606
hsa-miR-196a-3p	MIMAT0004562	hsa-miR-196a*	10735	STAG2	-0.56	http://www.microrna.org/microrna/getMrna.do?gene=10735&matureName=hsa-miR-196a*&organism=9606
hsa-miR-196a-3p	MIMAT0004562	hsa-miR-196a*	5505	PPP1R2P1	-0.13	http://www.microrna.org/microrna/getMrna.do?gene=5505&matureName=hsa-miR-196a*&organism=9606
hsa-miR-196a-3p	MIMAT0004562	hsa-miR-196a*	10137	RBM12	-0.42	http://www.microrna.org/microrna/getMrna.do?gene=10137&matureName=hsa-miR-196a*&organism=9606
hsa-miR-196a-3p	MIMAT0004562	hsa-miR-196a*	23285	KIAA1107	-0.11	http://www.microrna.org/microrna/getMrna.do?gene=23285&matureName=hsa-miR-196a*&organism=9606
hsa-miR-196a-3p	MIMAT0004562	hsa-miR-196a*	23456	ABCB10	-0.35	http://www.microrna.org/microrna/getMrna.do?gene=23456&matureName=hsa-miR-196a*&organism=9606
hsa-miR-196a-3p	MIMAT0004562	hsa-miR-196a*	23585	TMEM50A	-0.1	http://www.microrna.org/microrna/getMrna.do?gene=23585&matureName=hsa-miR-196a*&organism=9606
hsa-miR-196a-3p	MIMAT0004562	hsa-miR-196a*	90288	C3orf25	-0.31	http://www.microrna.org/microrna/getMrna.do?gene=90288&matureName=hsa-miR-196a*&organism=9606
hsa-miR-196a-3p	MIMAT0004562	hsa-miR-196a*	57643	ZSWIM5	-0.21	http://www.microrna.org/microrna/getMrna.do?gene=57643&matureName=hsa-miR-196a*&organism=9606
hsa-miR-196a-3p	MIMAT0004562	hsa-miR-196a*	22847	ZNF507	-0.25	http://www.microrna.org/microrna/getMrna.do?gene=22847&matureName=hsa-miR-196a*&organism=9606
hsa-miR-196a-3p	MIMAT0004562	hsa-miR-196a*	8289	ARID1A	-0.81	http://www.microrna.org/microrna/getMrna.do?gene=8289&matureName=hsa-miR-196a*&organism=9606
hsa-miR-196a-3p	MIMAT0004562	hsa-miR-196a*	324	APC	-0.63	http://www.microrna.org/microrna/getMrna.do?gene=324&matureName=hsa-miR-196a*&organism=9606
hsa-miR-196a-3p	MIMAT0004562	hsa-miR-196a*	5255	PHKA1	-0.22	http://www.microrna.org/microrna/getMrna.do?gene=5255&matureName=hsa-miR-196a*&organism=9606
hsa-miR-196a-3p	MIMAT0004562	hsa-miR-196a*	50862	RNF141	-0.59	http://www.microrna.org/microrna/getMrna.do?gene=50862&matureName=hsa-miR-196a*&organism=9606
hsa-miR-196a-3p	MIMAT0004562	hsa-miR-196a*	440446	FLJ42842	-0.22	http://www.microrna.org/microrna/getMrna.do?gene=440446&matureName=hsa-miR-196a*&organism=9606
hsa-miR-196a-3p	MIMAT0004562	hsa-miR-196a*	10252	SPRY1	-0.49	http://www.microrna.org/microrna/getMrna.do?gene=10252&matureName=hsa-miR-196a*&organism=9606
hsa-miR-196a-3p	MIMAT0004562	hsa-miR-196a*	23008	KLHDC10	-0.33	http://www.microrna.org/microrna/getMrna.do?gene=23008&matureName=hsa-miR-196a*&organism=9606
hsa-miR-196a-3p	MIMAT0004562	hsa-miR-196a*	23008	KLHDC10	-0.38	http://www.microrna.org/microrna/getMrna.do?gene=23008&matureName=hsa-miR-196a*&organism=9606
hsa-miR-196a-3p	MIMAT0004562	hsa-miR-196a*	29767	TMOD2	-0.11	http://www.microrna.org/microrna/getMrna.do?gene=29767&matureName=hsa-miR-196a*&organism=9606
hsa-miR-196a-3p	MIMAT0004562	hsa-miR-196a*	22889	KIAA0907	-0.26	http://www.microrna.org/microrna/getMrna.do?gene=22889&matureName=hsa-miR-196a*&organism=9606
hsa-miR-196a-3p	MIMAT0004562	hsa-miR-196a*	22889	KIAA0907	-0.43	http://www.microrna.org/microrna/getMrna.do?gene=22889&matureName=hsa-miR-196a*&organism=9606
hsa-miR-196a-3p	MIMAT0004562	hsa-miR-196a*	54921	CHTF8	-0.31	http://www.microrna.org/microrna/getMrna.do?gene=54921&matureName=hsa-miR-196a*&organism=9606
hsa-miR-196a-3p	MIMAT0004562	hsa-miR-196a*	91298	C12orf29	-0.57	http://www.microrna.org/microrna/getMrna.do?gene=91298&matureName=hsa-miR-196a*&organism=9606
hsa-miR-196a-3p	MIMAT0004562	hsa-miR-196a*	80746	TSEN2	-0.33	http://www.microrna.org/microrna/getMrna.do?gene=80746&matureName=hsa-miR-196a*&organism=9606
hsa-miR-196a-3p	MIMAT0004562	hsa-miR-196a*	80746	TSEN2	-0.7	http://www.microrna.org/microrna/getMrna.do?gene=80746&matureName=hsa-miR-196a*&organism=9606
hsa-miR-196a-3p	MIMAT0004562	hsa-miR-196a*	2968	GTF2H4	-0.21	http://www.microrna.org/microrna/getMrna.do?gene=2968&matureName=hsa-miR-196a*&organism=9606
hsa-miR-196a-3p	MIMAT0004562	hsa-miR-196a*	3658	IREB2	-0.83	http://www.microrna.org/microrna/getMrna.do?gene=3658&matureName=hsa-miR-196a*&organism=9606
hsa-miR-196a-3p	MIMAT0004562	hsa-miR-196a*	29995	LMCD1	-0.85	http://www.microrna.org/microrna/getMrna.do?gene=29995&matureName=hsa-miR-196a*&organism=9606
hsa-miR-196a-3p	MIMAT0004562	hsa-miR-196a*	1789	DNMT3B	-0.7	http://www.microrna.org/microrna/getMrna.do?gene=1789&matureName=hsa-miR-196a*&organism=9606
hsa-miR-196a-3p	MIMAT0004562	hsa-miR-196a*	24149	ZNF318	-0.67	http://www.microrna.org/microrna/getMrna.do?gene=24149&matureName=hsa-miR-196a*&organism=9606
hsa-miR-196a-3p	MIMAT0004562	hsa-miR-196a*	26048	ZNF500	-0.16	http://www.microrna.org/microrna/getMrna.do?gene=26048&matureName=hsa-miR-196a*&organism=9606
hsa-miR-196a-3p	MIMAT0004562	hsa-miR-196a*	6138	RPL15	-0.29	http://www.microrna.org/microrna/getMrna.do?gene=6138&matureName=hsa-miR-196a*&organism=9606
hsa-miR-196a-3p	MIMAT0004562	hsa-miR-196a*	57578	KIAA1409	-0.2	http://www.microrna.org/microrna/getMrna.do?gene=57578&matureName=hsa-miR-196a*&organism=9606
hsa-miR-196a-3p	MIMAT0004562	hsa-miR-196a*	92340	C17orf72	-0.49	http://www.microrna.org/microrna/getMrna.do?gene=92340&matureName=hsa-miR-196a*&organism=9606
hsa-miR-196a-3p	MIMAT0004562	hsa-miR-196a*	91694	LONRF1	-0.36	http://www.microrna.org/microrna/getMrna.do?gene=91694&matureName=hsa-miR-196a*&organism=9606
hsa-miR-196a-3p	MIMAT0004562	hsa-miR-196a*	728723	LOC728723	-0.13	http://www.microrna.org/microrna/getMrna.do?gene=728723&matureName=hsa-miR-196a*&organism=9606
hsa-miR-196a-3p	MIMAT0004562	hsa-miR-196a*	5797	PTPRM	-0.17	http://www.microrna.org/microrna/getMrna.do?gene=5797&matureName=hsa-miR-196a*&organism=9606
hsa-miR-196a-3p	MIMAT0004562	hsa-miR-196a*	56658	TRIM39	-1	http://www.microrna.org/microrna/getMrna.do?gene=56658&matureName=hsa-miR-196a*&organism=9606
hsa-miR-196a-3p	MIMAT0004562	hsa-miR-196a*	6047	RNF4	-0.16	http://www.microrna.org/microrna/getMrna.do?gene=6047&matureName=hsa-miR-196a*&organism=9606
hsa-miR-196a-3p	MIMAT0004562	hsa-miR-196a*	81894	SLC25A28	-0.7	http://www.microrna.org/microrna/getMrna.do?gene=81894&matureName=hsa-miR-196a*&organism=9606
hsa-miR-196a-3p	MIMAT0004562	hsa-miR-196a*	64682	ANAPC1	-0.1	http://www.microrna.org/microrna/getMrna.do?gene=64682&matureName=hsa-miR-196a*&organism=9606
hsa-miR-196a-3p	MIMAT0004562	hsa-miR-196a*	283768	GOLGA8G	-0.34	http://www.microrna.org/microrna/getMrna.do?gene=283768&matureName=hsa-miR-196a*&organism=9606
hsa-miR-196a-3p	MIMAT0004562	hsa-miR-196a*	9536	PTGES	-0.12	http://www.microrna.org/microrna/getMrna.do?gene=9536&matureName=hsa-miR-196a*&organism=9606
hsa-miR-196a-3p	MIMAT0004562	hsa-miR-196a*	1915	EEF1A1	-0.24	http://www.microrna.org/microrna/getMrna.do?gene=1915&matureName=hsa-miR-196a*&organism=9606
hsa-miR-196a-3p	MIMAT0004562	hsa-miR-196a*	6777	STAT5B	-0.15	http://www.microrna.org/microrna/getMrna.do?gene=6777&matureName=hsa-miR-196a*&organism=9606
hsa-miR-196a-3p	MIMAT0004562	hsa-miR-196a*	84168	ANTXR1	-0.58	http://www.microrna.org/microrna/getMrna.do?gene=84168&matureName=hsa-miR-196a*&organism=9606
hsa-miR-196a-3p	MIMAT0004562	hsa-miR-196a*	306	ANXA3	-0.14	http://www.microrna.org/microrna/getMrna.do?gene=306&matureName=hsa-miR-196a*&organism=9606
hsa-miR-196a-3p	MIMAT0004562	hsa-miR-196a*	79645	EFCAB1	-0.53	http://www.microrna.org/microrna/getMrna.do?gene=79645&matureName=hsa-miR-196a*&organism=9606
hsa-miR-196a-3p	MIMAT0004562	hsa-miR-196a*	5683	PSMA2	-0.84	http://www.microrna.org/microrna/getMrna.do?gene=5683&matureName=hsa-miR-196a*&organism=9606
hsa-miR-196a-3p	MIMAT0004562	hsa-miR-196a*	27010	TPK1	-0.53	http://www.microrna.org/microrna/getMrna.do?gene=27010&matureName=hsa-miR-196a*&organism=9606
hsa-miR-196a-3p	MIMAT0004562	hsa-miR-196a*	27246	RNF115	-0.88	http://www.microrna.org/microrna/getMrna.do?gene=27246&matureName=hsa-miR-196a*&organism=9606
hsa-miR-196a-3p	MIMAT0004562	hsa-miR-196a*	474148	TTTY3B	-0.12	http://www.microrna.org/microrna/getMrna.do?gene=474148&matureName=hsa-miR-196a*&organism=9606
hsa-miR-196a-3p	MIMAT0004562	hsa-miR-196a*	388695	LYSMD1	-0.86	http://www.microrna.org/microrna/getMrna.do?gene=388695&matureName=hsa-miR-196a*&organism=9606
hsa-miR-196a-3p	MIMAT0004562	hsa-miR-196a*	23242	COBL	-0.21	http://www.microrna.org/microrna/getMrna.do?gene=23242&matureName=hsa-miR-196a*&organism=9606
hsa-miR-196a-3p	MIMAT0004562	hsa-miR-196a*	23242	COBL	-0.16	http://www.microrna.org/microrna/getMrna.do?gene=23242&matureName=hsa-miR-196a*&organism=9606
hsa-miR-196a-3p	MIMAT0004562	hsa-miR-196a*	114134	SLC2A13	-0.4	http://www.microrna.org/microrna/getMrna.do?gene=114134&matureName=hsa-miR-196a*&organism=9606
hsa-miR-196a-3p	MIMAT0004562	hsa-miR-196a*	80012	PHC3	-0.27	http://www.microrna.org/microrna/getMrna.do?gene=80012&matureName=hsa-miR-196a*&organism=9606
hsa-miR-196a-3p	MIMAT0004562	hsa-miR-196a*	1399	CRKL	-0.32	http://www.microrna.org/microrna/getMrna.do?gene=1399&matureName=hsa-miR-196a*&organism=9606
hsa-miR-196a-3p	MIMAT0004562	hsa-miR-196a*	9352	TXNL1	-0.12	http://www.microrna.org/microrna/getMrna.do?gene=9352&matureName=hsa-miR-196a*&organism=9606
hsa-miR-196a-3p	MIMAT0004562	hsa-miR-196a*	7916	BAT2	-0.15	http://www.microrna.org/microrna/getMrna.do?gene=7916&matureName=hsa-miR-196a*&organism=9606
hsa-miR-196a-3p	MIMAT0004562	hsa-miR-196a*	8609	KLF7	-0.65	http://www.microrna.org/microrna/getMrna.do?gene=8609&matureName=hsa-miR-196a*&organism=9606
hsa-miR-196a-3p	MIMAT0004562	hsa-miR-196a*	124923	SGK494	-0.1	http://www.microrna.org/microrna/getMrna.do?gene=124923&matureName=hsa-miR-196a*&organism=9606
hsa-miR-196a-3p	MIMAT0004562	hsa-miR-196a*	22993	HMGXB3	-0.12	http://www.microrna.org/microrna/getMrna.do?gene=22993&matureName=hsa-miR-196a*&organism=9606
hsa-miR-196a-3p	MIMAT0004562	hsa-miR-196a*	55254	TMEM39A	-0.4	http://www.microrna.org/microrna/getMrna.do?gene=55254&matureName=hsa-miR-196a*&organism=9606
hsa-miR-196a-3p	MIMAT0004562	hsa-miR-196a*	9824	ARHGAP11A	-0.13	http://www.microrna.org/microrna/getMrna.do?gene=9824&matureName=hsa-miR-196a*&organism=9606
hsa-miR-196a-3p	MIMAT0004562	hsa-miR-196a*	8502	PKP4	-0.95	http://www.microrna.org/microrna/getMrna.do?gene=8502&matureName=hsa-miR-196a*&organism=9606
hsa-miR-196a-3p	MIMAT0004562	hsa-miR-196a*	8532	CPZ	-0.42	http://www.microrna.org/microrna/getMrna.do?gene=8532&matureName=hsa-miR-196a*&organism=9606
hsa-miR-196a-3p	MIMAT0004562	hsa-miR-196a*	55124	PIWIL2	-0.44	http://www.microrna.org/microrna/getMrna.do?gene=55124&matureName=hsa-miR-196a*&organism=9606
hsa-miR-196a-3p	MIMAT0004562	hsa-miR-196a*	23361	ZNF629	-0.11	http://www.microrna.org/microrna/getMrna.do?gene=23361&matureName=hsa-miR-196a*&organism=9606
hsa-miR-196a-3p	MIMAT0004562	hsa-miR-196a*	202151	RANBP3L	-0.44	http://www.microrna.org/microrna/getMrna.do?gene=202151&matureName=hsa-miR-196a*&organism=9606
hsa-miR-196a-3p	MIMAT0004562	hsa-miR-196a*	1806	DPYD	-0.14	http://www.microrna.org/microrna/getMrna.do?gene=1806&matureName=hsa-miR-196a*&organism=9606
hsa-miR-196a-3p	MIMAT0004562	hsa-miR-196a*	1983	EIF5	-0.34	http://www.microrna.org/microrna/getMrna.do?gene=1983&matureName=hsa-miR-196a*&organism=9606
hsa-miR-196a-3p	MIMAT0004562	hsa-miR-196a*	150696	PROM2	-0.21	http://www.microrna.org/microrna/getMrna.do?gene=150696&matureName=hsa-miR-196a*&organism=9606
hsa-miR-196a-3p	MIMAT0004562	hsa-miR-196a*	8835	SOCS2	-0.44	http://www.microrna.org/microrna/getMrna.do?gene=8835&matureName=hsa-miR-196a*&organism=9606
hsa-miR-196a-3p	MIMAT0004562	hsa-miR-196a*	204	AK2	-0.18	http://www.microrna.org/microrna/getMrna.do?gene=204&matureName=hsa-miR-196a*&organism=9606
hsa-miR-196a-3p	MIMAT0004562	hsa-miR-196a*	112937	GLB1L3	-0.71	http://www.microrna.org/microrna/getMrna.do?gene=112937&matureName=hsa-miR-196a*&organism=9606
hsa-miR-196a-3p	MIMAT0004562	hsa-miR-196a*	113263	GLCCI1	-0.13	http://www.microrna.org/microrna/getMrna.do?gene=113263&matureName=hsa-miR-196a*&organism=9606
hsa-miR-196a-3p	MIMAT0004562	hsa-miR-196a*	79567	FAM65A	-0.48	http://www.microrna.org/microrna/getMrna.do?gene=79567&matureName=hsa-miR-196a*&organism=9606
hsa-miR-196a-3p	MIMAT0004562	hsa-miR-196a*	339123	JMJD8	-0.6	http://www.microrna.org/microrna/getMrna.do?gene=339123&matureName=hsa-miR-196a*&organism=9606
hsa-miR-196a-3p	MIMAT0004562	hsa-miR-196a*	4254	KITLG	-0.19	http://www.microrna.org/microrna/getMrna.do?gene=4254&matureName=hsa-miR-196a*&organism=9606
hsa-miR-196a-3p	MIMAT0004562	hsa-miR-196a*	160897	GPR180	-0.1	http://www.microrna.org/microrna/getMrna.do?gene=160897&matureName=hsa-miR-196a*&organism=9606
hsa-miR-196a-3p	MIMAT0004562	hsa-miR-196a*	84991	RBM17	-0.26	http://www.microrna.org/microrna/getMrna.do?gene=84991&matureName=hsa-miR-196a*&organism=9606
hsa-miR-196a-3p	MIMAT0004562	hsa-miR-196a*	25987	TSKU	-1.02	http://www.microrna.org/microrna/getMrna.do?gene=25987&matureName=hsa-miR-196a*&organism=9606
hsa-miR-196a-3p	MIMAT0004562	hsa-miR-196a*	80314	EPC1	-0.12	http://www.microrna.org/microrna/getMrna.do?gene=80314&matureName=hsa-miR-196a*&organism=9606
hsa-miR-196a-3p	MIMAT0004562	hsa-miR-196a*	10424	PGRMC2	-0.1	http://www.microrna.org/microrna/getMrna.do?gene=10424&matureName=hsa-miR-196a*&organism=9606
hsa-miR-196a-3p	MIMAT0004562	hsa-miR-196a*	79148	MMP28	-0.21	http://www.microrna.org/microrna/getMrna.do?gene=79148&matureName=hsa-miR-196a*&organism=9606
hsa-miR-196a-3p	MIMAT0004562	hsa-miR-196a*	9890	LPPR4	-0.59	http://www.microrna.org/microrna/getMrna.do?gene=9890&matureName=hsa-miR-196a*&organism=9606
hsa-miR-196a-3p	MIMAT0004562	hsa-miR-196a*	2309	FOXO3	-0.68	http://www.microrna.org/microrna/getMrna.do?gene=2309&matureName=hsa-miR-196a*&organism=9606
hsa-miR-196a-3p	MIMAT0004562	hsa-miR-196a*	145407	C14orf37	-1.21	http://www.microrna.org/microrna/getMrna.do?gene=145407&matureName=hsa-miR-196a*&organism=9606
hsa-miR-196a-3p	MIMAT0004562	hsa-miR-196a*	9993	DGCR2	-0.11	http://www.microrna.org/microrna/getMrna.do?gene=9993&matureName=hsa-miR-196a*&organism=9606
hsa-miR-196a-3p	MIMAT0004562	hsa-miR-196a*	6201	RPS7	-0.18	http://www.microrna.org/microrna/getMrna.do?gene=6201&matureName=hsa-miR-196a*&organism=9606
hsa-miR-196a-3p	MIMAT0004562	hsa-miR-196a*	407977	TNFSF12-TNFSF13	-0.26	http://www.microrna.org/microrna/getMrna.do?gene=407977&matureName=hsa-miR-196a*&organism=9606
hsa-miR-196a-3p	MIMAT0004562	hsa-miR-196a*	1452	CSNK1A1	-0.15	http://www.microrna.org/microrna/getMrna.do?gene=1452&matureName=hsa-miR-196a*&organism=9606
hsa-miR-196a-3p	MIMAT0004562	hsa-miR-196a*	26056	RAB11FIP5	-0.64	http://www.microrna.org/microrna/getMrna.do?gene=26056&matureName=hsa-miR-196a*&organism=9606
hsa-miR-196a-3p	MIMAT0004562	hsa-miR-196a*	246329	STAC3	-0.1	http://www.microrna.org/microrna/getMrna.do?gene=246329&matureName=hsa-miR-196a*&organism=9606
hsa-miR-196a-3p	MIMAT0004562	hsa-miR-196a*	79086	C19orf42	-0.92	http://www.microrna.org/microrna/getMrna.do?gene=79086&matureName=hsa-miR-196a*&organism=9606
hsa-miR-196a-3p	MIMAT0004562	hsa-miR-196a*	55898	UNC45A	-0.99	http://www.microrna.org/microrna/getMrna.do?gene=55898&matureName=hsa-miR-196a*&organism=9606
hsa-miR-196a-3p	MIMAT0004562	hsa-miR-196a*	152992	C4orf23	-0.18	http://www.microrna.org/microrna/getMrna.do?gene=152992&matureName=hsa-miR-196a*&organism=9606
hsa-miR-196a-3p	MIMAT0004562	hsa-miR-196a*	60468	BACH2	-0.12	http://www.microrna.org/microrna/getMrna.do?gene=60468&matureName=hsa-miR-196a*&organism=9606
hsa-miR-196a-3p	MIMAT0004562	hsa-miR-196a*	252983	STXBP4	-0.11	http://www.microrna.org/microrna/getMrna.do?gene=252983&matureName=hsa-miR-196a*&organism=9606
hsa-miR-196a-3p	MIMAT0004562	hsa-miR-196a*	2034	EPAS1	-0.94	http://www.microrna.org/microrna/getMrna.do?gene=2034&matureName=hsa-miR-196a*&organism=9606
hsa-miR-196a-3p	MIMAT0004562	hsa-miR-196a*	2034	EPAS1	-0.22	http://www.microrna.org/microrna/getMrna.do?gene=2034&matureName=hsa-miR-196a*&organism=9606
hsa-miR-196a-3p	MIMAT0004562	hsa-miR-196a*	5862	RAB2A	-0.13	http://www.microrna.org/microrna/getMrna.do?gene=5862&matureName=hsa-miR-196a*&organism=9606
hsa-miR-196a-3p	MIMAT0004562	hsa-miR-196a*	8036	SHOC2	-0.19	http://www.microrna.org/microrna/getMrna.do?gene=8036&matureName=hsa-miR-196a*&organism=9606
hsa-miR-196a-3p	MIMAT0004562	hsa-miR-196a*	4610	MYCL1	-1.1	http://www.microrna.org/microrna/getMrna.do?gene=4610&matureName=hsa-miR-196a*&organism=9606
hsa-miR-196a-3p	MIMAT0004562	hsa-miR-196a*	4610	MYCL1	-1.03	http://www.microrna.org/microrna/getMrna.do?gene=4610&matureName=hsa-miR-196a*&organism=9606
hsa-miR-196a-3p	MIMAT0004562	hsa-miR-196a*	195814	SDR16C5	-0.84	http://www.microrna.org/microrna/getMrna.do?gene=195814&matureName=hsa-miR-196a*&organism=9606
hsa-miR-196a-3p	MIMAT0004562	hsa-miR-196a*	166968	MIER3	-0.39	http://www.microrna.org/microrna/getMrna.do?gene=166968&matureName=hsa-miR-196a*&organism=9606
hsa-miR-196a-3p	MIMAT0004562	hsa-miR-196a*	2177	FANCD2	-0.36	http://www.microrna.org/microrna/getMrna.do?gene=2177&matureName=hsa-miR-196a*&organism=9606
hsa-miR-196a-3p	MIMAT0004562	hsa-miR-196a*	143689	PIWIL4	-0.41	http://www.microrna.org/microrna/getMrna.do?gene=143689&matureName=hsa-miR-196a*&organism=9606
hsa-miR-196a-3p	MIMAT0004562	hsa-miR-196a*	79685	SAP30L	-0.2	http://www.microrna.org/microrna/getMrna.do?gene=79685&matureName=hsa-miR-196a*&organism=9606
hsa-miR-196a-3p	MIMAT0004562	hsa-miR-196a*	55605	KIF21A	-0.31	http://www.microrna.org/microrna/getMrna.do?gene=55605&matureName=hsa-miR-196a*&organism=9606
hsa-miR-196a-3p	MIMAT0004562	hsa-miR-196a*	90701	SEC11C	-0.24	http://www.microrna.org/microrna/getMrna.do?gene=90701&matureName=hsa-miR-196a*&organism=9606
hsa-miR-196a-3p	MIMAT0004562	hsa-miR-196a*	3399	ID3	-0.69	http://www.microrna.org/microrna/getMrna.do?gene=3399&matureName=hsa-miR-196a*&organism=9606
hsa-miR-196a-3p	MIMAT0004562	hsa-miR-196a*	8030	CCDC6	-0.28	http://www.microrna.org/microrna/getMrna.do?gene=8030&matureName=hsa-miR-196a*&organism=9606
hsa-miR-196a-3p	MIMAT0004562	hsa-miR-196a*	24150	TP53TG3	-0.45	http://www.microrna.org/microrna/getMrna.do?gene=24150&matureName=hsa-miR-196a*&organism=9606
hsa-miR-196a-3p	MIMAT0004562	hsa-miR-196a*	23658	LSM5	-0.66	http://www.microrna.org/microrna/getMrna.do?gene=23658&matureName=hsa-miR-196a*&organism=9606
hsa-miR-196a-3p	MIMAT0004562	hsa-miR-196a*	51251	NT5C3	-0.12	http://www.microrna.org/microrna/getMrna.do?gene=51251&matureName=hsa-miR-196a*&organism=9606
hsa-miR-196a-3p	MIMAT0004562	hsa-miR-196a*	28973	MRPS18B	-0.89	http://www.microrna.org/microrna/getMrna.do?gene=28973&matureName=hsa-miR-196a*&organism=9606
hsa-miR-196a-3p	MIMAT0004562	hsa-miR-196a*	6892	TAPBP	-0.46	http://www.microrna.org/microrna/getMrna.do?gene=6892&matureName=hsa-miR-196a*&organism=9606
hsa-miR-196a-3p	MIMAT0004562	hsa-miR-196a*	56911	C21orf7	-0.71	http://www.microrna.org/microrna/getMrna.do?gene=56911&matureName=hsa-miR-196a*&organism=9606
hsa-miR-196a-3p	MIMAT0004562	hsa-miR-196a*	88455	ANKRD13A	-0.53	http://www.microrna.org/microrna/getMrna.do?gene=88455&matureName=hsa-miR-196a*&organism=9606
hsa-miR-196a-3p	MIMAT0004562	hsa-miR-196a*	88455	ANKRD13A	-0.61	http://www.microrna.org/microrna/getMrna.do?gene=88455&matureName=hsa-miR-196a*&organism=9606
hsa-miR-196a-3p	MIMAT0004562	hsa-miR-196a*	403314	APOBEC4	-0.19	http://www.microrna.org/microrna/getMrna.do?gene=403314&matureName=hsa-miR-196a*&organism=9606
hsa-miR-196a-3p	MIMAT0004562	hsa-miR-196a*	51213	LUZP4	-1.07	http://www.microrna.org/microrna/getMrna.do?gene=51213&matureName=hsa-miR-196a*&organism=9606
hsa-miR-196a-3p	MIMAT0004562	hsa-miR-196a*	124602	KIF19	-0.56	http://www.microrna.org/microrna/getMrna.do?gene=124602&matureName=hsa-miR-196a*&organism=9606
hsa-miR-196a-3p	MIMAT0004562	hsa-miR-196a*	6622	SNCA	-1.03	http://www.microrna.org/microrna/getMrna.do?gene=6622&matureName=hsa-miR-196a*&organism=9606
hsa-miR-196a-3p	MIMAT0004562	hsa-miR-196a*	326624	RAB37	-0.21	http://www.microrna.org/microrna/getMrna.do?gene=326624&matureName=hsa-miR-196a*&organism=9606
hsa-miR-196a-3p	MIMAT0004562	hsa-miR-196a*	6434	TRA2B	-0.21	http://www.microrna.org/microrna/getMrna.do?gene=6434&matureName=hsa-miR-196a*&organism=9606
hsa-miR-196a-3p	MIMAT0004562	hsa-miR-196a*	6434	TRA2B	-0.2	http://www.microrna.org/microrna/getMrna.do?gene=6434&matureName=hsa-miR-196a*&organism=9606
hsa-miR-196a-3p	MIMAT0004562	hsa-miR-196a*	6434	TRA2B	-0.27	http://www.microrna.org/microrna/getMrna.do?gene=6434&matureName=hsa-miR-196a*&organism=9606
hsa-miR-196a-3p	MIMAT0004562	hsa-miR-196a*	164380	CSTT	-0.12	http://www.microrna.org/microrna/getMrna.do?gene=164380&matureName=hsa-miR-196a*&organism=9606
hsa-miR-196a-3p	MIMAT0004562	hsa-miR-196a*	57545	CC2D2A	-0.77	http://www.microrna.org/microrna/getMrna.do?gene=57545&matureName=hsa-miR-196a*&organism=9606
hsa-miR-196a-3p	MIMAT0004562	hsa-miR-196a*	55603	FAM46A	-0.22	http://www.microrna.org/microrna/getMrna.do?gene=55603&matureName=hsa-miR-196a*&organism=9606
hsa-miR-196a-3p	MIMAT0004562	hsa-miR-196a*	64332	NFKBIZ	-0.21	http://www.microrna.org/microrna/getMrna.do?gene=64332&matureName=hsa-miR-196a*&organism=9606
hsa-miR-196a-3p	MIMAT0004562	hsa-miR-196a*	64332	NFKBIZ	-0.52	http://www.microrna.org/microrna/getMrna.do?gene=64332&matureName=hsa-miR-196a*&organism=9606
hsa-miR-196a-3p	MIMAT0004562	hsa-miR-196a*	8744	TNFSF9	-1	http://www.microrna.org/microrna/getMrna.do?gene=8744&matureName=hsa-miR-196a*&organism=9606
hsa-miR-196a-3p	MIMAT0004562	hsa-miR-196a*	9493	KIF23	-0.1	http://www.microrna.org/microrna/getMrna.do?gene=9493&matureName=hsa-miR-196a*&organism=9606
hsa-miR-196a-3p	MIMAT0004562	hsa-miR-196a*	79624	C6orf211	-0.4	http://www.microrna.org/microrna/getMrna.do?gene=79624&matureName=hsa-miR-196a*&organism=9606
hsa-miR-196a-3p	MIMAT0004562	hsa-miR-196a*	9491	PSMF1	-0.65	http://www.microrna.org/microrna/getMrna.do?gene=9491&matureName=hsa-miR-196a*&organism=9606
hsa-miR-196a-3p	MIMAT0004562	hsa-miR-196a*	10120	ACTR1B	-0.19	http://www.microrna.org/microrna/getMrna.do?gene=10120&matureName=hsa-miR-196a*&organism=9606
hsa-miR-196a-3p	MIMAT0004562	hsa-miR-196a*	85449	KIAA1755	-0.22	http://www.microrna.org/microrna/getMrna.do?gene=85449&matureName=hsa-miR-196a*&organism=9606
hsa-miR-196a-3p	MIMAT0004562	hsa-miR-196a*	54480	CHPF2	-0.15	http://www.microrna.org/microrna/getMrna.do?gene=54480&matureName=hsa-miR-196a*&organism=9606
hsa-miR-196a-3p	MIMAT0004562	hsa-miR-196a*	27020	NPTN	-0.23	http://www.microrna.org/microrna/getMrna.do?gene=27020&matureName=hsa-miR-196a*&organism=9606
hsa-miR-196a-3p	MIMAT0004562	hsa-miR-196a*	23023	TMCC1	-0.22	http://www.microrna.org/microrna/getMrna.do?gene=23023&matureName=hsa-miR-196a*&organism=9606
hsa-miR-196a-3p	MIMAT0004562	hsa-miR-196a*	548645	DNAJC25	-1.33	http://www.microrna.org/microrna/getMrna.do?gene=548645&matureName=hsa-miR-196a*&organism=9606
hsa-miR-196a-3p	MIMAT0004562	hsa-miR-196a*	79876	UBA5	-0.82	http://www.microrna.org/microrna/getMrna.do?gene=79876&matureName=hsa-miR-196a*&organism=9606
hsa-miR-196a-3p	MIMAT0004562	hsa-miR-196a*	4325	MMP16	-0.22	http://www.microrna.org/microrna/getMrna.do?gene=4325&matureName=hsa-miR-196a*&organism=9606
hsa-miR-196a-3p	MIMAT0004562	hsa-miR-196a*	143379	C10orf82	-0.21	http://www.microrna.org/microrna/getMrna.do?gene=143379&matureName=hsa-miR-196a*&organism=9606
hsa-miR-196a-3p	MIMAT0004562	hsa-miR-196a*	143379	C10orf82	-0.14	http://www.microrna.org/microrna/getMrna.do?gene=143379&matureName=hsa-miR-196a*&organism=9606
hsa-miR-196a-3p	MIMAT0004562	hsa-miR-196a*	220963	SLC16A9	-1.03	http://www.microrna.org/microrna/getMrna.do?gene=220963&matureName=hsa-miR-196a*&organism=9606
hsa-miR-196a-3p	MIMAT0004562	hsa-miR-196a*	220963	SLC16A9	-0.13	http://www.microrna.org/microrna/getMrna.do?gene=220963&matureName=hsa-miR-196a*&organism=9606
hsa-miR-196a-3p	MIMAT0004562	hsa-miR-196a*	83857	TMTC1	-0.11	http://www.microrna.org/microrna/getMrna.do?gene=83857&matureName=hsa-miR-196a*&organism=9606
hsa-miR-196a-3p	MIMAT0004562	hsa-miR-196a*	100133920	LOC100133920	-0.86	http://www.microrna.org/microrna/getMrna.do?gene=100133920&matureName=hsa-miR-196a*&organism=9606
hsa-miR-196a-3p	MIMAT0004562	hsa-miR-196a*	2542	SLC37A4	-0.34	http://www.microrna.org/microrna/getMrna.do?gene=2542&matureName=hsa-miR-196a*&organism=9606
hsa-miR-196a-3p	MIMAT0004562	hsa-miR-196a*	11260	XPOT	-1.24	http://www.microrna.org/microrna/getMrna.do?gene=11260&matureName=hsa-miR-196a*&organism=9606
hsa-miR-196a-3p	MIMAT0004562	hsa-miR-196a*	7681	MKRN3	-0.18	http://www.microrna.org/microrna/getMrna.do?gene=7681&matureName=hsa-miR-196a*&organism=9606
hsa-miR-196a-3p	MIMAT0004562	hsa-miR-196a*	55250	ELP2	-1.01	http://www.microrna.org/microrna/getMrna.do?gene=55250&matureName=hsa-miR-196a*&organism=9606
hsa-miR-196a-3p	MIMAT0004562	hsa-miR-196a*	84365	MKI67IP	-0.23	http://www.microrna.org/microrna/getMrna.do?gene=84365&matureName=hsa-miR-196a*&organism=9606
hsa-miR-196a-3p	MIMAT0004562	hsa-miR-196a*	256536	TCERG1L	-1.24	http://www.microrna.org/microrna/getMrna.do?gene=256536&matureName=hsa-miR-196a*&organism=9606
hsa-miR-196a-3p	MIMAT0004562	hsa-miR-196a*	23095	KIF1B	-0.25	http://www.microrna.org/microrna/getMrna.do?gene=23095&matureName=hsa-miR-196a*&organism=9606
hsa-miR-196a-3p	MIMAT0004562	hsa-miR-196a*	6668	SP2	-0.12	http://www.microrna.org/microrna/getMrna.do?gene=6668&matureName=hsa-miR-196a*&organism=9606
hsa-miR-196a-3p	MIMAT0004562	hsa-miR-196a*	6668	SP2	-0.11	http://www.microrna.org/microrna/getMrna.do?gene=6668&matureName=hsa-miR-196a*&organism=9606
hsa-miR-196a-3p	MIMAT0004562	hsa-miR-196a*	261726	TIPRL	-0.91	http://www.microrna.org/microrna/getMrna.do?gene=261726&matureName=hsa-miR-196a*&organism=9606
hsa-miR-196a-3p	MIMAT0004562	hsa-miR-196a*	5380	PMS2L2	-0.31	http://www.microrna.org/microrna/getMrna.do?gene=5380&matureName=hsa-miR-196a*&organism=9606
hsa-miR-196a-3p	MIMAT0004562	hsa-miR-196a*	5017	OVOL1	-0.39	http://www.microrna.org/microrna/getMrna.do?gene=5017&matureName=hsa-miR-196a*&organism=9606
hsa-miR-196a-3p	MIMAT0004562	hsa-miR-196a*	4891	SLC11A2	-0.12	http://www.microrna.org/microrna/getMrna.do?gene=4891&matureName=hsa-miR-196a*&organism=9606
hsa-miR-196a-3p	MIMAT0004562	hsa-miR-196a*	1845	DUSP3	-0.21	http://www.microrna.org/microrna/getMrna.do?gene=1845&matureName=hsa-miR-196a*&organism=9606
hsa-miR-196a-3p	MIMAT0004562	hsa-miR-196a*	2830	GPR6	-1.11	http://www.microrna.org/microrna/getMrna.do?gene=2830&matureName=hsa-miR-196a*&organism=9606
hsa-miR-196a-3p	MIMAT0004562	hsa-miR-196a*	6941	TCF19	-0.67	http://www.microrna.org/microrna/getMrna.do?gene=6941&matureName=hsa-miR-196a*&organism=9606
hsa-miR-196a-3p	MIMAT0004562	hsa-miR-196a*	23514	KIAA0146	-1.04	http://www.microrna.org/microrna/getMrna.do?gene=23514&matureName=hsa-miR-196a*&organism=9606
hsa-miR-196a-3p	MIMAT0004562	hsa-miR-196a*	54	ACP5	-0.16	http://www.microrna.org/microrna/getMrna.do?gene=54&matureName=hsa-miR-196a*&organism=9606
hsa-miR-196a-3p	MIMAT0004562	hsa-miR-196a*	10328	COX4NB	-0.11	http://www.microrna.org/microrna/getMrna.do?gene=10328&matureName=hsa-miR-196a*&organism=9606
hsa-miR-196a-3p	MIMAT0004562	hsa-miR-196a*	283303	C11orf36	-0.15	http://www.microrna.org/microrna/getMrna.do?gene=283303&matureName=hsa-miR-196a*&organism=9606
hsa-miR-196a-3p	MIMAT0004562	hsa-miR-196a*	4776	NFATC4	-0.47	http://www.microrna.org/microrna/getMrna.do?gene=4776&matureName=hsa-miR-196a*&organism=9606
hsa-miR-196a-3p	MIMAT0004562	hsa-miR-196a*	54960	GEMIN8	-0.35	http://www.microrna.org/microrna/getMrna.do?gene=54960&matureName=hsa-miR-196a*&organism=9606
hsa-miR-196a-3p	MIMAT0004562	hsa-miR-196a*	54960	GEMIN8	-0.29	http://www.microrna.org/microrna/getMrna.do?gene=54960&matureName=hsa-miR-196a*&organism=9606
hsa-miR-196a-3p	MIMAT0004562	hsa-miR-196a*	54960	GEMIN8	-0.15	http://www.microrna.org/microrna/getMrna.do?gene=54960&matureName=hsa-miR-196a*&organism=9606
hsa-miR-196a-3p	MIMAT0004562	hsa-miR-196a*	143458	LDLRAD3	-0.87	http://www.microrna.org/microrna/getMrna.do?gene=143458&matureName=hsa-miR-196a*&organism=9606
hsa-miR-196a-3p	MIMAT0004562	hsa-miR-196a*	10101	NUBP2	-0.15	http://www.microrna.org/microrna/getMrna.do?gene=10101&matureName=hsa-miR-196a*&organism=9606
hsa-miR-196a-3p	MIMAT0004562	hsa-miR-196a*	643365	FLJ44054	-0.2	http://www.microrna.org/microrna/getMrna.do?gene=643365&matureName=hsa-miR-196a*&organism=9606
hsa-miR-196a-3p	MIMAT0004562	hsa-miR-196a*	246329	STAC3	-0.1	http://www.microrna.org/microrna/getMrna.do?gene=246329&matureName=hsa-miR-196a*&organism=9606
hsa-miR-196a-3p	MIMAT0004562	hsa-miR-196a*	9536	PTGES	-0.11	http://www.microrna.org/microrna/getMrna.do?gene=9536&matureName=hsa-miR-196a*&organism=9606
hsa-miR-196a-3p	MIMAT0004562	hsa-miR-196a*	7773	ZNF230	-0.7	http://www.microrna.org/microrna/getMrna.do?gene=7773&matureName=hsa-miR-196a*&organism=9606
hsa-miR-196a-3p	MIMAT0004562	hsa-miR-196a*	6677	SPAM1	-0.66	http://www.microrna.org/microrna/getMrna.do?gene=6677&matureName=hsa-miR-196a*&organism=9606
hsa-miR-196a-3p	MIMAT0004562	hsa-miR-196a*	84129	ACAD11	-0.18	http://www.microrna.org/microrna/getMrna.do?gene=84129&matureName=hsa-miR-196a*&organism=9606
hsa-miR-196a-3p	MIMAT0004562	hsa-miR-196a*	7006	TEC	-0.75	http://www.microrna.org/microrna/getMrna.do?gene=7006&matureName=hsa-miR-196a*&organism=9606
hsa-miR-196a-3p	MIMAT0004562	hsa-miR-196a*	1810	DR1	-0.12	http://www.microrna.org/microrna/getMrna.do?gene=1810&matureName=hsa-miR-196a*&organism=9606
hsa-miR-196a-3p	MIMAT0004562	hsa-miR-196a*	5906	RAP1A	-0.88	http://www.microrna.org/microrna/getMrna.do?gene=5906&matureName=hsa-miR-196a*&organism=9606
hsa-miR-196a-3p	MIMAT0004562	hsa-miR-196a*	137392	FAM92A1	-0.29	http://www.microrna.org/microrna/getMrna.do?gene=137392&matureName=hsa-miR-196a*&organism=9606
hsa-miR-196a-3p	MIMAT0004562	hsa-miR-196a*	59340	HRH4	-0.67	http://www.microrna.org/microrna/getMrna.do?gene=59340&matureName=hsa-miR-196a*&organism=9606
hsa-miR-196a-3p	MIMAT0004562	hsa-miR-196a*	79608	RIC3	-0.11	http://www.microrna.org/microrna/getMrna.do?gene=79608&matureName=hsa-miR-196a*&organism=9606
hsa-miR-196a-3p	MIMAT0004562	hsa-miR-196a*	6602	SMARCD1	-0.37	http://www.microrna.org/microrna/getMrna.do?gene=6602&matureName=hsa-miR-196a*&organism=9606
hsa-miR-196a-3p	MIMAT0004562	hsa-miR-196a*	6602	SMARCD1	-0.37	http://www.microrna.org/microrna/getMrna.do?gene=6602&matureName=hsa-miR-196a*&organism=9606
hsa-miR-196a-3p	MIMAT0004562	hsa-miR-196a*	80177	MYCT1	-0.46	http://www.microrna.org/microrna/getMrna.do?gene=80177&matureName=hsa-miR-196a*&organism=9606
hsa-miR-196a-3p	MIMAT0004562	hsa-miR-196a*	1807	DPYS	-0.1	http://www.microrna.org/microrna/getMrna.do?gene=1807&matureName=hsa-miR-196a*&organism=9606
hsa-miR-196a-3p	MIMAT0004562	hsa-miR-196a*	3930	LBR	-1.08	http://www.microrna.org/microrna/getMrna.do?gene=3930&matureName=hsa-miR-196a*&organism=9606
hsa-miR-196a-3p	MIMAT0004562	hsa-miR-196a*	3930	LBR	-0.17	http://www.microrna.org/microrna/getMrna.do?gene=3930&matureName=hsa-miR-196a*&organism=9606
hsa-miR-196a-3p	MIMAT0004562	hsa-miR-196a*	65988	ZNF747	-0.15	http://www.microrna.org/microrna/getMrna.do?gene=65988&matureName=hsa-miR-196a*&organism=9606
hsa-miR-196a-3p	MIMAT0004562	hsa-miR-196a*	54972	TMEM132A	-0.55	http://www.microrna.org/microrna/getMrna.do?gene=54972&matureName=hsa-miR-196a*&organism=9606
hsa-miR-196a-3p	MIMAT0004562	hsa-miR-196a*	379034	FLJ10489	-0.11	http://www.microrna.org/microrna/getMrna.do?gene=379034&matureName=hsa-miR-196a*&organism=9606
hsa-miR-196a-3p	MIMAT0004562	hsa-miR-196a*	3176	HNMT	-0.6	http://www.microrna.org/microrna/getMrna.do?gene=3176&matureName=hsa-miR-196a*&organism=9606
hsa-miR-196a-3p	MIMAT0004562	hsa-miR-196a*	3176	HNMT	-0.53	http://www.microrna.org/microrna/getMrna.do?gene=3176&matureName=hsa-miR-196a*&organism=9606
hsa-miR-196a-3p	MIMAT0004562	hsa-miR-196a*	653121	ZBTB8A	-0.3	http://www.microrna.org/microrna/getMrna.do?gene=653121&matureName=hsa-miR-196a*&organism=9606
hsa-miR-196a-3p	MIMAT0004562	hsa-miR-196a*	653121	ZBTB8A	-0.16	http://www.microrna.org/microrna/getMrna.do?gene=653121&matureName=hsa-miR-196a*&organism=9606
hsa-miR-196a-3p	MIMAT0004562	hsa-miR-196a*	387693	LOC387693	-0.11	http://www.microrna.org/microrna/getMrna.do?gene=387693&matureName=hsa-miR-196a*&organism=9606
hsa-miR-196a-3p	MIMAT0004562	hsa-miR-196a*	2760	GM2A	-0.19	http://www.microrna.org/microrna/getMrna.do?gene=2760&matureName=hsa-miR-196a*&organism=9606
hsa-miR-196a-3p	MIMAT0004562	hsa-miR-196a*	26289	AK5	-1.13	http://www.microrna.org/microrna/getMrna.do?gene=26289&matureName=hsa-miR-196a*&organism=9606
hsa-miR-196a-3p	MIMAT0004562	hsa-miR-196a*	11322	TMC6	-0.16	http://www.microrna.org/microrna/getMrna.do?gene=11322&matureName=hsa-miR-196a*&organism=9606
hsa-miR-196a-3p	MIMAT0004562	hsa-miR-196a*	125144	NCRNA00188	-0.24	http://www.microrna.org/microrna/getMrna.do?gene=125144&matureName=hsa-miR-196a*&organism=9606
hsa-miR-196a-3p	MIMAT0004562	hsa-miR-196a*	100130894	LOC100130894	-0.12	http://www.microrna.org/microrna/getMrna.do?gene=100130894&matureName=hsa-miR-196a*&organism=9606
hsa-miR-196a-3p	MIMAT0004562	hsa-miR-196a*	10040	TOM1L1	-1.02	http://www.microrna.org/microrna/getMrna.do?gene=10040&matureName=hsa-miR-196a*&organism=9606
hsa-miR-196a-3p	MIMAT0004562	hsa-miR-196a*	114826	SMYD4	-0.11	http://www.microrna.org/microrna/getMrna.do?gene=114826&matureName=hsa-miR-196a*&organism=9606
hsa-miR-196a-3p	MIMAT0004562	hsa-miR-196a*	8972	MGAM	-0.14	http://www.microrna.org/microrna/getMrna.do?gene=8972&matureName=hsa-miR-196a*&organism=9606
hsa-miR-196a-3p	MIMAT0004562	hsa-miR-196a*	259217	HSPA12A	-0.37	http://www.microrna.org/microrna/getMrna.do?gene=259217&matureName=hsa-miR-196a*&organism=9606
hsa-miR-196a-3p	MIMAT0004562	hsa-miR-196a*	9501	RPH3AL	-0.15	http://www.microrna.org/microrna/getMrna.do?gene=9501&matureName=hsa-miR-196a*&organism=9606
hsa-miR-196a-3p	MIMAT0004562	hsa-miR-196a*	405	ARNT	-0.11	http://www.microrna.org/microrna/getMrna.do?gene=405&matureName=hsa-miR-196a*&organism=9606
hsa-miR-196a-3p	MIMAT0004562	hsa-miR-196a*	79969	C6orf134	-0.45	http://www.microrna.org/microrna/getMrna.do?gene=79969&matureName=hsa-miR-196a*&organism=9606
hsa-miR-196a-3p	MIMAT0004562	hsa-miR-196a*	79969	C6orf134	-0.15	http://www.microrna.org/microrna/getMrna.do?gene=79969&matureName=hsa-miR-196a*&organism=9606
hsa-miR-196a-3p	MIMAT0004562	hsa-miR-196a*	55010	C12orf48	-0.13	http://www.microrna.org/microrna/getMrna.do?gene=55010&matureName=hsa-miR-196a*&organism=9606
hsa-miR-196a-3p	MIMAT0004562	hsa-miR-196a*	55827	DCAF6	-0.21	http://www.microrna.org/microrna/getMrna.do?gene=55827&matureName=hsa-miR-196a*&organism=9606
hsa-miR-196a-3p	MIMAT0004562	hsa-miR-196a*	84557	MAP1LC3A	-0.61	http://www.microrna.org/microrna/getMrna.do?gene=84557&matureName=hsa-miR-196a*&organism=9606
hsa-miR-196a-3p	MIMAT0004562	hsa-miR-196a*	10425	ARIH2	-0.14	http://www.microrna.org/microrna/getMrna.do?gene=10425&matureName=hsa-miR-196a*&organism=9606
hsa-miR-196a-3p	MIMAT0004562	hsa-miR-196a*	115207	KCTD12	-0.94	http://www.microrna.org/microrna/getMrna.do?gene=115207&matureName=hsa-miR-196a*&organism=9606
hsa-miR-196a-3p	MIMAT0004562	hsa-miR-196a*	130827	TMEM182	-0.46	http://www.microrna.org/microrna/getMrna.do?gene=130827&matureName=hsa-miR-196a*&organism=9606
hsa-miR-196a-3p	MIMAT0004562	hsa-miR-196a*	130827	TMEM182	-0.55	http://www.microrna.org/microrna/getMrna.do?gene=130827&matureName=hsa-miR-196a*&organism=9606
hsa-miR-196a-3p	MIMAT0004562	hsa-miR-196a*	285954	LOC285954	-0.55	http://www.microrna.org/microrna/getMrna.do?gene=285954&matureName=hsa-miR-196a*&organism=9606
hsa-miR-196a-3p	MIMAT0004562	hsa-miR-196a*	51200	CPA4	-0.18	http://www.microrna.org/microrna/getMrna.do?gene=51200&matureName=hsa-miR-196a*&organism=9606
hsa-miR-196a-3p	MIMAT0004562	hsa-miR-196a*	23301	EHBP1	-1.2	http://www.microrna.org/microrna/getMrna.do?gene=23301&matureName=hsa-miR-196a*&organism=9606
hsa-miR-196a-3p	MIMAT0004562	hsa-miR-196a*	55766	H2AFJ	-0.34	http://www.microrna.org/microrna/getMrna.do?gene=55766&matureName=hsa-miR-196a*&organism=9606
hsa-miR-196a-3p	MIMAT0004562	hsa-miR-196a*	7639	ZNF85	-0.38	http://www.microrna.org/microrna/getMrna.do?gene=7639&matureName=hsa-miR-196a*&organism=9606
hsa-miR-196a-3p	MIMAT0004562	hsa-miR-196a*	113540	CMTM1	-0.11	http://www.microrna.org/microrna/getMrna.do?gene=113540&matureName=hsa-miR-196a*&organism=9606
hsa-miR-196a-3p	MIMAT0004562	hsa-miR-196a*	55197	RPRD1A	-1.2	http://www.microrna.org/microrna/getMrna.do?gene=55197&matureName=hsa-miR-196a*&organism=9606
hsa-miR-196a-3p	MIMAT0004562	hsa-miR-196a*	55197	RPRD1A	-0.14	http://www.microrna.org/microrna/getMrna.do?gene=55197&matureName=hsa-miR-196a*&organism=9606
hsa-miR-196a-3p	MIMAT0004562	hsa-miR-196a*	23268	DNMBP	-0.3	http://www.microrna.org/microrna/getMrna.do?gene=23268&matureName=hsa-miR-196a*&organism=9606
hsa-miR-196a-3p	MIMAT0004562	hsa-miR-196a*	196051	PPAPDC1A	-0.44	http://www.microrna.org/microrna/getMrna.do?gene=196051&matureName=hsa-miR-196a*&organism=9606
hsa-miR-196a-3p	MIMAT0004562	hsa-miR-196a*	83861	RSPH3	-0.79	http://www.microrna.org/microrna/getMrna.do?gene=83861&matureName=hsa-miR-196a*&organism=9606
hsa-miR-196a-3p	MIMAT0004562	hsa-miR-196a*	153562	MARVELD2	-0.27	http://www.microrna.org/microrna/getMrna.do?gene=153562&matureName=hsa-miR-196a*&organism=9606
hsa-miR-196a-3p	MIMAT0004562	hsa-miR-196a*	51433	ANAPC5	-0.21	http://www.microrna.org/microrna/getMrna.do?gene=51433&matureName=hsa-miR-196a*&organism=9606
hsa-miR-196a-3p	MIMAT0004562	hsa-miR-196a*	441425	ANKRD20A3	-1.21	http://www.microrna.org/microrna/getMrna.do?gene=441425&matureName=hsa-miR-196a*&organism=9606
hsa-miR-196a-3p	MIMAT0004562	hsa-miR-196a*	5592	PRKG1	-0.1	http://www.microrna.org/microrna/getMrna.do?gene=5592&matureName=hsa-miR-196a*&organism=9606
hsa-miR-196a-3p	MIMAT0004562	hsa-miR-196a*	149111	CNIH3	-0.35	http://www.microrna.org/microrna/getMrna.do?gene=149111&matureName=hsa-miR-196a*&organism=9606
hsa-miR-196a-3p	MIMAT0004562	hsa-miR-196a*	645784	FLJ40330	-0.95	http://www.microrna.org/microrna/getMrna.do?gene=645784&matureName=hsa-miR-196a*&organism=9606
hsa-miR-196a-3p	MIMAT0004562	hsa-miR-196a*	79796	ALG9	-0.2	http://www.microrna.org/microrna/getMrna.do?gene=79796&matureName=hsa-miR-196a*&organism=9606
hsa-miR-196a-3p	MIMAT0004562	hsa-miR-196a*	23506	KIAA0240	-0.11	http://www.microrna.org/microrna/getMrna.do?gene=23506&matureName=hsa-miR-196a*&organism=9606
hsa-miR-196a-3p	MIMAT0004562	hsa-miR-196a*	348110	C15orf38	-0.18	http://www.microrna.org/microrna/getMrna.do?gene=348110&matureName=hsa-miR-196a*&organism=9606
hsa-miR-196a-3p	MIMAT0004562	hsa-miR-196a*	51193	ZNF639	-0.25	http://www.microrna.org/microrna/getMrna.do?gene=51193&matureName=hsa-miR-196a*&organism=9606
hsa-miR-196a-3p	MIMAT0004562	hsa-miR-196a*	56913	C1GALT1	-1.05	http://www.microrna.org/microrna/getMrna.do?gene=56913&matureName=hsa-miR-196a*&organism=9606
hsa-miR-196a-3p	MIMAT0004562	hsa-miR-196a*	56913	C1GALT1	-0.17	http://www.microrna.org/microrna/getMrna.do?gene=56913&matureName=hsa-miR-196a*&organism=9606
hsa-miR-196a-3p	MIMAT0004562	hsa-miR-196a*	56913	C1GALT1	-0.1	http://www.microrna.org/microrna/getMrna.do?gene=56913&matureName=hsa-miR-196a*&organism=9606
hsa-miR-196a-3p	MIMAT0004562	hsa-miR-196a*	51761	ATP8A2	-0.1	http://www.microrna.org/microrna/getMrna.do?gene=51761&matureName=hsa-miR-196a*&organism=9606
hsa-miR-196a-3p	MIMAT0004562	hsa-miR-196a*	55667	DENND4C	-1.02	http://www.microrna.org/microrna/getMrna.do?gene=55667&matureName=hsa-miR-196a*&organism=9606
hsa-miR-196a-3p	MIMAT0004562	hsa-miR-196a*	55607	PPP1R9A	-0.26	http://www.microrna.org/microrna/getMrna.do?gene=55607&matureName=hsa-miR-196a*&organism=9606
hsa-miR-196a-3p	MIMAT0004562	hsa-miR-196a*	80143	SIKE1	-0.16	http://www.microrna.org/microrna/getMrna.do?gene=80143&matureName=hsa-miR-196a*&organism=9606
hsa-miR-196a-3p	MIMAT0004562	hsa-miR-196a*	6538	SLC6A11	-0.1	http://www.microrna.org/microrna/getMrna.do?gene=6538&matureName=hsa-miR-196a*&organism=9606
hsa-miR-196a-3p	MIMAT0004562	hsa-miR-196a*	6764	ST5	-0.59	http://www.microrna.org/microrna/getMrna.do?gene=6764&matureName=hsa-miR-196a*&organism=9606
hsa-miR-196a-3p	MIMAT0004562	hsa-miR-196a*	9371	KIF3B	-0.32	http://www.microrna.org/microrna/getMrna.do?gene=9371&matureName=hsa-miR-196a*&organism=9606
hsa-miR-196a-3p	MIMAT0004562	hsa-miR-196a*	5027	P2RX7	-0.18	http://www.microrna.org/microrna/getMrna.do?gene=5027&matureName=hsa-miR-196a*&organism=9606
hsa-miR-196a-3p	MIMAT0004562	hsa-miR-196a*	100048912	CDKN2BAS	-0.35	http://www.microrna.org/microrna/getMrna.do?gene=100048912&matureName=hsa-miR-196a*&organism=9606
hsa-miR-196a-3p	MIMAT0004562	hsa-miR-196a*	342897	NCCRP1	-0.19	http://www.microrna.org/microrna/getMrna.do?gene=342897&matureName=hsa-miR-196a*&organism=9606
hsa-miR-196a-3p	MIMAT0004562	hsa-miR-196a*	29994	BAZ2B	-0.12	http://www.microrna.org/microrna/getMrna.do?gene=29994&matureName=hsa-miR-196a*&organism=9606
hsa-miR-196a-3p	MIMAT0004562	hsa-miR-196a*	25912	C1orf43	-0.17	http://www.microrna.org/microrna/getMrna.do?gene=25912&matureName=hsa-miR-196a*&organism=9606
hsa-miR-196a-3p	MIMAT0004562	hsa-miR-196a*	1719	DHFR	-0.65	http://www.microrna.org/microrna/getMrna.do?gene=1719&matureName=hsa-miR-196a*&organism=9606
hsa-miR-196a-3p	MIMAT0004562	hsa-miR-196a*	5314	PKHD1	-0.83	http://www.microrna.org/microrna/getMrna.do?gene=5314&matureName=hsa-miR-196a*&organism=9606
hsa-miR-196a-3p	MIMAT0004562	hsa-miR-196a*	5516	PPP2CB	-0.13	http://www.microrna.org/microrna/getMrna.do?gene=5516&matureName=hsa-miR-196a*&organism=9606
hsa-miR-196a-3p	MIMAT0004562	hsa-miR-196a*	80762	NDFIP1	-0.83	http://www.microrna.org/microrna/getMrna.do?gene=80762&matureName=hsa-miR-196a*&organism=9606
hsa-miR-196a-3p	MIMAT0004562	hsa-miR-196a*	100287029	DDX11L10	-0.15	http://www.microrna.org/microrna/getMrna.do?gene=100287029&matureName=hsa-miR-196a*&organism=9606
hsa-miR-196a-3p	MIMAT0004562	hsa-miR-196a*	84100	ARL6	-0.13	http://www.microrna.org/microrna/getMrna.do?gene=84100&matureName=hsa-miR-196a*&organism=9606
hsa-miR-196a-3p	MIMAT0004562	hsa-miR-196a*	8320	EOMES	-0.1	http://www.microrna.org/microrna/getMrna.do?gene=8320&matureName=hsa-miR-196a*&organism=9606
hsa-miR-196a-3p	MIMAT0004562	hsa-miR-196a*	1477	CSTF1	-0.18	http://www.microrna.org/microrna/getMrna.do?gene=1477&matureName=hsa-miR-196a*&organism=9606
hsa-miR-196a-3p	MIMAT0004562	hsa-miR-196a*	388611	CD164L2	-0.12	http://www.microrna.org/microrna/getMrna.do?gene=388611&matureName=hsa-miR-196a*&organism=9606
hsa-miR-196a-3p	MIMAT0004562	hsa-miR-196a*	84181	CHD6	-0.63	http://www.microrna.org/microrna/getMrna.do?gene=84181&matureName=hsa-miR-196a*&organism=9606
hsa-miR-196a-3p	MIMAT0004562	hsa-miR-196a*	84181	CHD6	-0.55	http://www.microrna.org/microrna/getMrna.do?gene=84181&matureName=hsa-miR-196a*&organism=9606
hsa-miR-196a-3p	MIMAT0004562	hsa-miR-196a*	66008	TRAK2	-0.11	http://www.microrna.org/microrna/getMrna.do?gene=66008&matureName=hsa-miR-196a*&organism=9606
hsa-miR-196a-3p	MIMAT0004562	hsa-miR-196a*	6310	ATXN1	-0.3	http://www.microrna.org/microrna/getMrna.do?gene=6310&matureName=hsa-miR-196a*&organism=9606
hsa-miR-196a-3p	MIMAT0004562	hsa-miR-196a*	10311	DSCR3	-0.15	http://www.microrna.org/microrna/getMrna.do?gene=10311&matureName=hsa-miR-196a*&organism=9606
hsa-miR-196a-3p	MIMAT0004562	hsa-miR-196a*	267012	DAOA	-0.25	http://www.microrna.org/microrna/getMrna.do?gene=267012&matureName=hsa-miR-196a*&organism=9606
hsa-miR-196a-3p	MIMAT0004562	hsa-miR-196a*	10818	FRS2	-0.55	http://www.microrna.org/microrna/getMrna.do?gene=10818&matureName=hsa-miR-196a*&organism=9606
hsa-miR-196a-3p	MIMAT0004562	hsa-miR-196a*	10818	FRS2	-0.62	http://www.microrna.org/microrna/getMrna.do?gene=10818&matureName=hsa-miR-196a*&organism=9606
hsa-miR-196a-3p	MIMAT0004562	hsa-miR-196a*	5332	PLCB4	-1.11	http://www.microrna.org/microrna/getMrna.do?gene=5332&matureName=hsa-miR-196a*&organism=9606
hsa-miR-196a-3p	MIMAT0004562	hsa-miR-196a*	285888	CNPY1	-0.45	http://www.microrna.org/microrna/getMrna.do?gene=285888&matureName=hsa-miR-196a*&organism=9606
hsa-miR-196a-3p	MIMAT0004562	hsa-miR-196a*	285888	CNPY1	-0.99	http://www.microrna.org/microrna/getMrna.do?gene=285888&matureName=hsa-miR-196a*&organism=9606
hsa-miR-196a-3p	MIMAT0004562	hsa-miR-196a*	25928	SOSTDC1	-0.92	http://www.microrna.org/microrna/getMrna.do?gene=25928&matureName=hsa-miR-196a*&organism=9606
hsa-miR-196a-3p	MIMAT0004562	hsa-miR-196a*	5337	PLD1	-0.1	http://www.microrna.org/microrna/getMrna.do?gene=5337&matureName=hsa-miR-196a*&organism=9606
hsa-miR-196a-3p	MIMAT0004562	hsa-miR-196a*	134957	STXBP5	-0.48	http://www.microrna.org/microrna/getMrna.do?gene=134957&matureName=hsa-miR-196a*&organism=9606
hsa-miR-196a-3p	MIMAT0004562	hsa-miR-196a*	7157	TP53	-0.16	http://www.microrna.org/microrna/getMrna.do?gene=7157&matureName=hsa-miR-196a*&organism=9606
hsa-miR-196a-3p	MIMAT0004562	hsa-miR-196a*	23181	DIP2A	-0.64	http://www.microrna.org/microrna/getMrna.do?gene=23181&matureName=hsa-miR-196a*&organism=9606
hsa-miR-196a-3p	MIMAT0004562	hsa-miR-196a*	8997	KALRN	-0.84	http://www.microrna.org/microrna/getMrna.do?gene=8997&matureName=hsa-miR-196a*&organism=9606
hsa-miR-196a-3p	MIMAT0004562	hsa-miR-196a*	51566	ARMCX3	-0.16	http://www.microrna.org/microrna/getMrna.do?gene=51566&matureName=hsa-miR-196a*&organism=9606
hsa-miR-196a-3p	MIMAT0004562	hsa-miR-196a*	5520	PPP2R2A	-0.21	http://www.microrna.org/microrna/getMrna.do?gene=5520&matureName=hsa-miR-196a*&organism=9606
hsa-miR-196a-3p	MIMAT0004562	hsa-miR-196a*	10147	SFRS14	-0.38	http://www.microrna.org/microrna/getMrna.do?gene=10147&matureName=hsa-miR-196a*&organism=9606
hsa-miR-196a-3p	MIMAT0004562	hsa-miR-196a*	800	CALD1	-0.63	http://www.microrna.org/microrna/getMrna.do?gene=800&matureName=hsa-miR-196a*&organism=9606
hsa-miR-196a-3p	MIMAT0004562	hsa-miR-196a*	25913	POT1	-0.24	http://www.microrna.org/microrna/getMrna.do?gene=25913&matureName=hsa-miR-196a*&organism=9606
hsa-miR-196a-3p	MIMAT0004562	hsa-miR-196a*	25840	METTL7A	-0.21	http://www.microrna.org/microrna/getMrna.do?gene=25840&matureName=hsa-miR-196a*&organism=9606
hsa-miR-196a-3p	MIMAT0004562	hsa-miR-196a*	25840	METTL7A	-0.19	http://www.microrna.org/microrna/getMrna.do?gene=25840&matureName=hsa-miR-196a*&organism=9606
hsa-miR-196a-3p	MIMAT0004562	hsa-miR-196a*	374872	C19orf35	-0.22	http://www.microrna.org/microrna/getMrna.do?gene=374872&matureName=hsa-miR-196a*&organism=9606
hsa-miR-196a-3p	MIMAT0004562	hsa-miR-196a*	160857	CCDC122	-0.35	http://www.microrna.org/microrna/getMrna.do?gene=160857&matureName=hsa-miR-196a*&organism=9606
hsa-miR-196a-3p	MIMAT0004562	hsa-miR-196a*	100133991	LOC100133991	-0.18	http://www.microrna.org/microrna/getMrna.do?gene=100133991&matureName=hsa-miR-196a*&organism=9606
hsa-miR-196a-3p	MIMAT0004562	hsa-miR-196a*	4763	NF1	-0.66	http://www.microrna.org/microrna/getMrna.do?gene=4763&matureName=hsa-miR-196a*&organism=9606
hsa-miR-196a-3p	MIMAT0004562	hsa-miR-196a*	2043	EPHA4	-0.26	http://www.microrna.org/microrna/getMrna.do?gene=2043&matureName=hsa-miR-196a*&organism=9606
hsa-miR-196a-3p	MIMAT0004562	hsa-miR-196a*	133015	PACRGL	-0.23	http://www.microrna.org/microrna/getMrna.do?gene=133015&matureName=hsa-miR-196a*&organism=9606
hsa-miR-196a-3p	MIMAT0004562	hsa-miR-196a*	140739	UBE2F	-0.41	http://www.microrna.org/microrna/getMrna.do?gene=140739&matureName=hsa-miR-196a*&organism=9606
hsa-miR-196a-3p	MIMAT0004562	hsa-miR-196a*	85406	DNAJC14	-0.12	http://www.microrna.org/microrna/getMrna.do?gene=85406&matureName=hsa-miR-196a*&organism=9606
hsa-miR-196a-3p	MIMAT0004562	hsa-miR-196a*	85406	DNAJC14	-0.11	http://www.microrna.org/microrna/getMrna.do?gene=85406&matureName=hsa-miR-196a*&organism=9606
hsa-miR-196a-3p	MIMAT0004562	hsa-miR-196a*	85406	DNAJC14	-0.97	http://www.microrna.org/microrna/getMrna.do?gene=85406&matureName=hsa-miR-196a*&organism=9606
hsa-miR-196a-3p	MIMAT0004562	hsa-miR-196a*	11022	TDRKH	-0.68	http://www.microrna.org/microrna/getMrna.do?gene=11022&matureName=hsa-miR-196a*&organism=9606
hsa-miR-196a-3p	MIMAT0004562	hsa-miR-196a*	728689	EIF3CL	-0.97	http://www.microrna.org/microrna/getMrna.do?gene=728689&matureName=hsa-miR-196a*&organism=9606
hsa-miR-196a-3p	MIMAT0004562	hsa-miR-196a*	8653	DDX3Y	-0.11	http://www.microrna.org/microrna/getMrna.do?gene=8653&matureName=hsa-miR-196a*&organism=9606
hsa-miR-196a-3p	MIMAT0004562	hsa-miR-196a*	81545	FBXO38	-0.31	http://www.microrna.org/microrna/getMrna.do?gene=81545&matureName=hsa-miR-196a*&organism=9606
hsa-miR-196a-3p	MIMAT0004562	hsa-miR-196a*	24150	TP53TG3	-1.01	http://www.microrna.org/microrna/getMrna.do?gene=24150&matureName=hsa-miR-196a*&organism=9606
hsa-miR-196a-3p	MIMAT0004562	hsa-miR-196a*	8693	GALNT4	-0.3	http://www.microrna.org/microrna/getMrna.do?gene=8693&matureName=hsa-miR-196a*&organism=9606
hsa-miR-196a-3p	MIMAT0004562	hsa-miR-196a*	84826	SFT2D3	-0.11	http://www.microrna.org/microrna/getMrna.do?gene=84826&matureName=hsa-miR-196a*&organism=9606
hsa-miR-196a-3p	MIMAT0004562	hsa-miR-196a*	843	CASP10	-0.12	http://www.microrna.org/microrna/getMrna.do?gene=843&matureName=hsa-miR-196a*&organism=9606
hsa-miR-196a-3p	MIMAT0004562	hsa-miR-196a*	2301	FOXE3	-0.33	http://www.microrna.org/microrna/getMrna.do?gene=2301&matureName=hsa-miR-196a*&organism=9606
hsa-miR-196a-3p	MIMAT0004562	hsa-miR-196a*	224	ALDH3A2	-0.18	http://www.microrna.org/microrna/getMrna.do?gene=224&matureName=hsa-miR-196a*&organism=9606
hsa-miR-196a-3p	MIMAT0004562	hsa-miR-196a*	376132	LRRC10	-0.33	http://www.microrna.org/microrna/getMrna.do?gene=376132&matureName=hsa-miR-196a*&organism=9606
hsa-miR-196a-3p	MIMAT0004562	hsa-miR-196a*	728723	LOC728723	-0.16	http://www.microrna.org/microrna/getMrna.do?gene=728723&matureName=hsa-miR-196a*&organism=9606
hsa-miR-196a-3p	MIMAT0004562	hsa-miR-196a*	100133991	LOC100133991	-0.16	http://www.microrna.org/microrna/getMrna.do?gene=100133991&matureName=hsa-miR-196a*&organism=9606
hsa-miR-196a-3p	MIMAT0004562	hsa-miR-196a*	203547	VMA21	-0.68	http://www.microrna.org/microrna/getMrna.do?gene=203547&matureName=hsa-miR-196a*&organism=9606
hsa-miR-196a-3p	MIMAT0004562	hsa-miR-196a*	79937	CNTNAP3	-0.21	http://www.microrna.org/microrna/getMrna.do?gene=79937&matureName=hsa-miR-196a*&organism=9606
hsa-miR-196a-3p	MIMAT0004562	hsa-miR-196a*	400735	PRAMEF4	-0.6	http://www.microrna.org/microrna/getMrna.do?gene=400735&matureName=hsa-miR-196a*&organism=9606
hsa-miR-196a-3p	MIMAT0004562	hsa-miR-196a*	1846	DUSP4	-0.31	http://www.microrna.org/microrna/getMrna.do?gene=1846&matureName=hsa-miR-196a*&organism=9606
hsa-miR-196a-3p	MIMAT0004562	hsa-miR-196a*	1846	DUSP4	-0.65	http://www.microrna.org/microrna/getMrna.do?gene=1846&matureName=hsa-miR-196a*&organism=9606
hsa-miR-196a-3p	MIMAT0004562	hsa-miR-196a*	84641	HIATL1	-0.14	http://www.microrna.org/microrna/getMrna.do?gene=84641&matureName=hsa-miR-196a*&organism=9606
hsa-miR-196a-3p	MIMAT0004562	hsa-miR-196a*	2040	STOM	-0.11	http://www.microrna.org/microrna/getMrna.do?gene=2040&matureName=hsa-miR-196a*&organism=9606
hsa-miR-196a-3p	MIMAT0004562	hsa-miR-196a*	2040	STOM	-0.62	http://www.microrna.org/microrna/getMrna.do?gene=2040&matureName=hsa-miR-196a*&organism=9606
hsa-miR-196a-3p	MIMAT0004562	hsa-miR-196a*	285598	ARL10	-0.38	http://www.microrna.org/microrna/getMrna.do?gene=285598&matureName=hsa-miR-196a*&organism=9606
hsa-miR-196a-3p	MIMAT0004562	hsa-miR-196a*	6856	SYPL1	-0.91	http://www.microrna.org/microrna/getMrna.do?gene=6856&matureName=hsa-miR-196a*&organism=9606
hsa-miR-196a-3p	MIMAT0004562	hsa-miR-196a*	6856	SYPL1	-1.16	http://www.microrna.org/microrna/getMrna.do?gene=6856&matureName=hsa-miR-196a*&organism=9606
hsa-miR-196a-3p	MIMAT0004562	hsa-miR-196a*	388512	CLEC17A	-0.19	http://www.microrna.org/microrna/getMrna.do?gene=388512&matureName=hsa-miR-196a*&organism=9606
hsa-miR-196a-3p	MIMAT0004562	hsa-miR-196a*	2332	FMR1	-0.2	http://www.microrna.org/microrna/getMrna.do?gene=2332&matureName=hsa-miR-196a*&organism=9606
hsa-miR-196a-3p	MIMAT0004562	hsa-miR-196a*	100272228	LOC100272228	-0.39	http://www.microrna.org/microrna/getMrna.do?gene=100272228&matureName=hsa-miR-196a*&organism=9606
hsa-miR-196a-3p	MIMAT0004562	hsa-miR-196a*	4846	NOS3	-0.13	http://www.microrna.org/microrna/getMrna.do?gene=4846&matureName=hsa-miR-196a*&organism=9606
hsa-miR-196a-3p	MIMAT0004562	hsa-miR-196a*	80312	TET1	-0.88	http://www.microrna.org/microrna/getMrna.do?gene=80312&matureName=hsa-miR-196a*&organism=9606
hsa-miR-196a-3p	MIMAT0004562	hsa-miR-196a*	401024	FSIP2	-1.22	http://www.microrna.org/microrna/getMrna.do?gene=401024&matureName=hsa-miR-196a*&organism=9606
hsa-miR-196a-3p	MIMAT0004562	hsa-miR-196a*	7257	TSNAX	-0.16	http://www.microrna.org/microrna/getMrna.do?gene=7257&matureName=hsa-miR-196a*&organism=9606
hsa-miR-196a-3p	MIMAT0004562	hsa-miR-196a*	6566	SLC16A1	-0.22	http://www.microrna.org/microrna/getMrna.do?gene=6566&matureName=hsa-miR-196a*&organism=9606
hsa-miR-196a-3p	MIMAT0004562	hsa-miR-196a*	6566	SLC16A1	-0.12	http://www.microrna.org/microrna/getMrna.do?gene=6566&matureName=hsa-miR-196a*&organism=9606
hsa-miR-196a-3p	MIMAT0004562	hsa-miR-196a*	56969	RPL23AP32	-0.86	http://www.microrna.org/microrna/getMrna.do?gene=56969&matureName=hsa-miR-196a*&organism=9606
hsa-miR-196a-3p	MIMAT0004562	hsa-miR-196a*	7405	UVRAG	-0.56	http://www.microrna.org/microrna/getMrna.do?gene=7405&matureName=hsa-miR-196a*&organism=9606
hsa-miR-196a-3p	MIMAT0004562	hsa-miR-196a*	51134	CCDC41	-1.09	http://www.microrna.org/microrna/getMrna.do?gene=51134&matureName=hsa-miR-196a*&organism=9606
hsa-miR-196a-3p	MIMAT0004562	hsa-miR-196a*	55187	VPS13D	-0.31	http://www.microrna.org/microrna/getMrna.do?gene=55187&matureName=hsa-miR-196a*&organism=9606
hsa-miR-196a-3p	MIMAT0004562	hsa-miR-196a*	54516	MTRF1L	-0.42	http://www.microrna.org/microrna/getMrna.do?gene=54516&matureName=hsa-miR-196a*&organism=9606
hsa-miR-196a-3p	MIMAT0004562	hsa-miR-196a*	3111	HLA-DOA	-0.53	http://www.microrna.org/microrna/getMrna.do?gene=3111&matureName=hsa-miR-196a*&organism=9606
hsa-miR-196a-3p	MIMAT0004562	hsa-miR-196a*	125144	NCRNA00188	-0.26	http://www.microrna.org/microrna/getMrna.do?gene=125144&matureName=hsa-miR-196a*&organism=9606
hsa-miR-196a-3p	MIMAT0004562	hsa-miR-196a*	134429	STARD4	-0.11	http://www.microrna.org/microrna/getMrna.do?gene=134429&matureName=hsa-miR-196a*&organism=9606
hsa-miR-196a-3p	MIMAT0004562	hsa-miR-196a*	8835	SOCS2	-0.94	http://www.microrna.org/microrna/getMrna.do?gene=8835&matureName=hsa-miR-196a*&organism=9606
hsa-miR-196a-3p	MIMAT0004562	hsa-miR-196a*	901	CCNG2	-0.13	http://www.microrna.org/microrna/getMrna.do?gene=901&matureName=hsa-miR-196a*&organism=9606
hsa-miR-196a-3p	MIMAT0004562	hsa-miR-196a*	58525	WIZ	-0.17	http://www.microrna.org/microrna/getMrna.do?gene=58525&matureName=hsa-miR-196a*&organism=9606
hsa-miR-196a-3p	MIMAT0004562	hsa-miR-196a*	83716	CRISPLD2	-0.42	http://www.microrna.org/microrna/getMrna.do?gene=83716&matureName=hsa-miR-196a*&organism=9606
hsa-miR-196a-3p	MIMAT0004562	hsa-miR-196a*	27327	TNRC6A	-0.69	http://www.microrna.org/microrna/getMrna.do?gene=27327&matureName=hsa-miR-196a*&organism=9606
hsa-miR-196a-3p	MIMAT0004562	hsa-miR-196a*	92070	C4orf42	-0.14	http://www.microrna.org/microrna/getMrna.do?gene=92070&matureName=hsa-miR-196a*&organism=9606
hsa-miR-196a-3p	MIMAT0004562	hsa-miR-196a*	51141	INSIG2	-1.22	http://www.microrna.org/microrna/getMrna.do?gene=51141&matureName=hsa-miR-196a*&organism=9606
hsa-miR-196a-3p	MIMAT0004562	hsa-miR-196a*	5532	PPP3CB	-1.23	http://www.microrna.org/microrna/getMrna.do?gene=5532&matureName=hsa-miR-196a*&organism=9606
hsa-miR-196a-3p	MIMAT0004562	hsa-miR-196a*	550112	LOC550112	-0.23	http://www.microrna.org/microrna/getMrna.do?gene=550112&matureName=hsa-miR-196a*&organism=9606
hsa-miR-196a-3p	MIMAT0004562	hsa-miR-196a*	1237	CCR8	-1.17	http://www.microrna.org/microrna/getMrna.do?gene=1237&matureName=hsa-miR-196a*&organism=9606
hsa-miR-196a-3p	MIMAT0004562	hsa-miR-196a*	4026	LPP	-0.15	http://www.microrna.org/microrna/getMrna.do?gene=4026&matureName=hsa-miR-196a*&organism=9606
hsa-miR-196a-3p	MIMAT0004562	hsa-miR-196a*	5709	PSMD3	-0.82	http://www.microrna.org/microrna/getMrna.do?gene=5709&matureName=hsa-miR-196a*&organism=9606
hsa-miR-196a-3p	MIMAT0004562	hsa-miR-196a*	1962	EHHADH	-0.21	http://www.microrna.org/microrna/getMrna.do?gene=1962&matureName=hsa-miR-196a*&organism=9606
hsa-miR-196a-3p	MIMAT0004562	hsa-miR-196a*	4298	MLLT1	-0.12	http://www.microrna.org/microrna/getMrna.do?gene=4298&matureName=hsa-miR-196a*&organism=9606
hsa-miR-196a-3p	MIMAT0004562	hsa-miR-196a*	23057	NMNAT2	-0.21	http://www.microrna.org/microrna/getMrna.do?gene=23057&matureName=hsa-miR-196a*&organism=9606
hsa-miR-196a-3p	MIMAT0004562	hsa-miR-196a*	10451	VAV3	-0.13	http://www.microrna.org/microrna/getMrna.do?gene=10451&matureName=hsa-miR-196a*&organism=9606
hsa-miR-196a-3p	MIMAT0004562	hsa-miR-196a*	79647	AKIRIN1	-0.16	http://www.microrna.org/microrna/getMrna.do?gene=79647&matureName=hsa-miR-196a*&organism=9606
hsa-miR-196a-3p	MIMAT0004562	hsa-miR-196a*	1804	DPP6	-0.15	http://www.microrna.org/microrna/getMrna.do?gene=1804&matureName=hsa-miR-196a*&organism=9606
hsa-miR-196a-3p	MIMAT0004562	hsa-miR-196a*	56882	CDC42SE1	-0.1	http://www.microrna.org/microrna/getMrna.do?gene=56882&matureName=hsa-miR-196a*&organism=9606
hsa-miR-196a-3p	MIMAT0004562	hsa-miR-196a*	9885	OSBPL2	-0.1	http://www.microrna.org/microrna/getMrna.do?gene=9885&matureName=hsa-miR-196a*&organism=9606
hsa-miR-196a-3p	MIMAT0004562	hsa-miR-196a*	5692	PSMB4	-0.2	http://www.microrna.org/microrna/getMrna.do?gene=5692&matureName=hsa-miR-196a*&organism=9606
hsa-miR-196a-3p	MIMAT0004562	hsa-miR-196a*	56829	ZC3HAV1	-0.48	http://www.microrna.org/microrna/getMrna.do?gene=56829&matureName=hsa-miR-196a*&organism=9606
hsa-miR-196a-3p	MIMAT0004562	hsa-miR-196a*	10463	SLC30A9	-1.02	http://www.microrna.org/microrna/getMrna.do?gene=10463&matureName=hsa-miR-196a*&organism=9606
hsa-miR-196a-3p	MIMAT0004562	hsa-miR-196a*	10463	SLC30A9	-0.11	http://www.microrna.org/microrna/getMrna.do?gene=10463&matureName=hsa-miR-196a*&organism=9606
hsa-miR-196a-3p	MIMAT0004562	hsa-miR-196a*	167691	LCA5	-0.2	http://www.microrna.org/microrna/getMrna.do?gene=167691&matureName=hsa-miR-196a*&organism=9606
hsa-miR-196a-3p	MIMAT0004562	hsa-miR-196a*	338657	CCDC84	-0.12	http://www.microrna.org/microrna/getMrna.do?gene=338657&matureName=hsa-miR-196a*&organism=9606
hsa-miR-196a-3p	MIMAT0004562	hsa-miR-196a*	84281	C2orf88	-0.58	http://www.microrna.org/microrna/getMrna.do?gene=84281&matureName=hsa-miR-196a*&organism=9606
hsa-miR-196a-3p	MIMAT0004562	hsa-miR-196a*	23046	KIF21B	-0.13	http://www.microrna.org/microrna/getMrna.do?gene=23046&matureName=hsa-miR-196a*&organism=9606
hsa-miR-196a-3p	MIMAT0004562	hsa-miR-196a*	54470	ARMCX6	-0.51	http://www.microrna.org/microrna/getMrna.do?gene=54470&matureName=hsa-miR-196a*&organism=9606
hsa-miR-196a-3p	MIMAT0004562	hsa-miR-196a*	158427	TSTD2	-0.2	http://www.microrna.org/microrna/getMrna.do?gene=158427&matureName=hsa-miR-196a*&organism=9606
hsa-miR-196a-3p	MIMAT0004562	hsa-miR-196a*	55656	INTS8	-0.43	http://www.microrna.org/microrna/getMrna.do?gene=55656&matureName=hsa-miR-196a*&organism=9606
hsa-miR-196a-3p	MIMAT0004562	hsa-miR-196a*	8626	TP63	-0.79	http://www.microrna.org/microrna/getMrna.do?gene=8626&matureName=hsa-miR-196a*&organism=9606
hsa-miR-196a-3p	MIMAT0004562	hsa-miR-196a*	2968	GTF2H4	-0.21	http://www.microrna.org/microrna/getMrna.do?gene=2968&matureName=hsa-miR-196a*&organism=9606
hsa-miR-196a-3p	MIMAT0004562	hsa-miR-196a*	150786	LOC150786	-0.45	http://www.microrna.org/microrna/getMrna.do?gene=150786&matureName=hsa-miR-196a*&organism=9606
hsa-miR-196a-3p	MIMAT0004562	hsa-miR-196a*	219790	RTKN2	-0.45	http://www.microrna.org/microrna/getMrna.do?gene=219790&matureName=hsa-miR-196a*&organism=9606
hsa-miR-196a-3p	MIMAT0004562	hsa-miR-196a*	8828	NRP2	-1.26	http://www.microrna.org/microrna/getMrna.do?gene=8828&matureName=hsa-miR-196a*&organism=9606
hsa-miR-196a-3p	MIMAT0004562	hsa-miR-196a*	8828	NRP2	-0.61	http://www.microrna.org/microrna/getMrna.do?gene=8828&matureName=hsa-miR-196a*&organism=9606
hsa-miR-196a-3p	MIMAT0004562	hsa-miR-196a*	118924	C10orf4	-0.31	http://www.microrna.org/microrna/getMrna.do?gene=118924&matureName=hsa-miR-196a*&organism=9606
hsa-miR-196a-3p	MIMAT0004562	hsa-miR-196a*	7323	UBE2D3	-0.15	http://www.microrna.org/microrna/getMrna.do?gene=7323&matureName=hsa-miR-196a*&organism=9606
hsa-miR-196a-3p	MIMAT0004562	hsa-miR-196a*	10199	MPHOSPH10	-0.29	http://www.microrna.org/microrna/getMrna.do?gene=10199&matureName=hsa-miR-196a*&organism=9606
hsa-miR-196a-3p	MIMAT0004562	hsa-miR-196a*	11004	KIF2C	-0.41	http://www.microrna.org/microrna/getMrna.do?gene=11004&matureName=hsa-miR-196a*&organism=9606
hsa-miR-196a-3p	MIMAT0004562	hsa-miR-196a*	3205	HOXA9	-0.11	http://www.microrna.org/microrna/getMrna.do?gene=3205&matureName=hsa-miR-196a*&organism=9606
hsa-miR-196a-3p	MIMAT0004562	hsa-miR-196a*	143689	PIWIL4	-0.73	http://www.microrna.org/microrna/getMrna.do?gene=143689&matureName=hsa-miR-196a*&organism=9606
hsa-miR-196a-3p	MIMAT0004562	hsa-miR-196a*	9201	DCLK1	-0.5	http://www.microrna.org/microrna/getMrna.do?gene=9201&matureName=hsa-miR-196a*&organism=9606
hsa-miR-196a-3p	MIMAT0004562	hsa-miR-196a*	23379	KIAA0947	-0.55	http://www.microrna.org/microrna/getMrna.do?gene=23379&matureName=hsa-miR-196a*&organism=9606
hsa-miR-196a-3p	MIMAT0004562	hsa-miR-196a*	440561	PRAMEF6	-0.34	http://www.microrna.org/microrna/getMrna.do?gene=440561&matureName=hsa-miR-196a*&organism=9606
hsa-miR-196a-3p	MIMAT0004562	hsa-miR-196a*	56884	FSTL5	-0.31	http://www.microrna.org/microrna/getMrna.do?gene=56884&matureName=hsa-miR-196a*&organism=9606
hsa-miR-196a-3p	MIMAT0004562	hsa-miR-196a*	7248	TSC1	-0.73	http://www.microrna.org/microrna/getMrna.do?gene=7248&matureName=hsa-miR-196a*&organism=9606
hsa-miR-196a-3p	MIMAT0004562	hsa-miR-196a*	83606	C22orf13	-0.14	http://www.microrna.org/microrna/getMrna.do?gene=83606&matureName=hsa-miR-196a*&organism=9606
hsa-miR-196a-3p	MIMAT0004562	hsa-miR-196a*	10642	IGF2BP1	-0.12	http://www.microrna.org/microrna/getMrna.do?gene=10642&matureName=hsa-miR-196a*&organism=9606
hsa-miR-196a-3p	MIMAT0004562	hsa-miR-196a*	51667	NUB1	-0.51	http://www.microrna.org/microrna/getMrna.do?gene=51667&matureName=hsa-miR-196a*&organism=9606
hsa-miR-196a-3p	MIMAT0004562	hsa-miR-196a*	387628	KGFLP1	-0.48	http://www.microrna.org/microrna/getMrna.do?gene=387628&matureName=hsa-miR-196a*&organism=9606
hsa-miR-196a-3p	MIMAT0004562	hsa-miR-196a*	55799	CACNA2D3	-0.26	http://www.microrna.org/microrna/getMrna.do?gene=55799&matureName=hsa-miR-196a*&organism=9606
hsa-miR-196a-3p	MIMAT0004562	hsa-miR-196a*	5212	VIT	-0.79	http://www.microrna.org/microrna/getMrna.do?gene=5212&matureName=hsa-miR-196a*&organism=9606
hsa-miR-196a-3p	MIMAT0004562	hsa-miR-196a*	5212	VIT	-0.12	http://www.microrna.org/microrna/getMrna.do?gene=5212&matureName=hsa-miR-196a*&organism=9606
hsa-miR-196a-3p	MIMAT0004562	hsa-miR-196a*	27445	PCLO	-0.64	http://www.microrna.org/microrna/getMrna.do?gene=27445&matureName=hsa-miR-196a*&organism=9606
hsa-miR-196a-3p	MIMAT0004562	hsa-miR-196a*	2776	GNAQ	-0.77	http://www.microrna.org/microrna/getMrna.do?gene=2776&matureName=hsa-miR-196a*&organism=9606
hsa-miR-196a-3p	MIMAT0004562	hsa-miR-196a*	55862	ECHDC1	-0.58	http://www.microrna.org/microrna/getMrna.do?gene=55862&matureName=hsa-miR-196a*&organism=9606
hsa-miR-196a-3p	MIMAT0004562	hsa-miR-196a*	22803	XRN2	-0.12	http://www.microrna.org/microrna/getMrna.do?gene=22803&matureName=hsa-miR-196a*&organism=9606
hsa-miR-196a-3p	MIMAT0004562	hsa-miR-196a*	22803	XRN2	-0.12	http://www.microrna.org/microrna/getMrna.do?gene=22803&matureName=hsa-miR-196a*&organism=9606
hsa-miR-196a-3p	MIMAT0004562	hsa-miR-196a*	146050	ZSCAN29	-0.21	http://www.microrna.org/microrna/getMrna.do?gene=146050&matureName=hsa-miR-196a*&organism=9606
hsa-miR-196a-3p	MIMAT0004562	hsa-miR-196a*	213	ALB	-0.35	http://www.microrna.org/microrna/getMrna.do?gene=213&matureName=hsa-miR-196a*&organism=9606
hsa-miR-196a-3p	MIMAT0004562	hsa-miR-196a*	213	ALB	-1.04	http://www.microrna.org/microrna/getMrna.do?gene=213&matureName=hsa-miR-196a*&organism=9606
hsa-miR-196a-3p	MIMAT0004562	hsa-miR-196a*	5987	TRIM27	-0.27	http://www.microrna.org/microrna/getMrna.do?gene=5987&matureName=hsa-miR-196a*&organism=9606
hsa-miR-196a-3p	MIMAT0004562	hsa-miR-196a*	6672	SP100	-0.1	http://www.microrna.org/microrna/getMrna.do?gene=6672&matureName=hsa-miR-196a*&organism=9606
hsa-miR-196a-3p	MIMAT0004562	hsa-miR-196a*	5150	PDE7A	-0.12	http://www.microrna.org/microrna/getMrna.do?gene=5150&matureName=hsa-miR-196a*&organism=9606
hsa-miR-196a-3p	MIMAT0004562	hsa-miR-196a*	5150	PDE7A	-0.14	http://www.microrna.org/microrna/getMrna.do?gene=5150&matureName=hsa-miR-196a*&organism=9606
hsa-miR-196a-3p	MIMAT0004562	hsa-miR-196a*	23089	PEG10	-0.12	http://www.microrna.org/microrna/getMrna.do?gene=23089&matureName=hsa-miR-196a*&organism=9606
hsa-miR-196a-3p	MIMAT0004562	hsa-miR-196a*	147172	LRRC37B2	-0.11	http://www.microrna.org/microrna/getMrna.do?gene=147172&matureName=hsa-miR-196a*&organism=9606
hsa-miR-196a-3p	MIMAT0004562	hsa-miR-196a*	147172	LRRC37B2	-0.53	http://www.microrna.org/microrna/getMrna.do?gene=147172&matureName=hsa-miR-196a*&organism=9606
hsa-miR-196a-3p	MIMAT0004562	hsa-miR-196a*	115111	SLC26A7	-0.16	http://www.microrna.org/microrna/getMrna.do?gene=115111&matureName=hsa-miR-196a*&organism=9606
hsa-miR-196a-3p	MIMAT0004562	hsa-miR-196a*	339834	CCDC36	-0.17	http://www.microrna.org/microrna/getMrna.do?gene=339834&matureName=hsa-miR-196a*&organism=9606
hsa-miR-196a-3p	MIMAT0004562	hsa-miR-196a*	6941	TCF19	-0.51	http://www.microrna.org/microrna/getMrna.do?gene=6941&matureName=hsa-miR-196a*&organism=9606
hsa-miR-196a-3p	MIMAT0004562	hsa-miR-196a*	8503	PIK3R3	-0.44	http://www.microrna.org/microrna/getMrna.do?gene=8503&matureName=hsa-miR-196a*&organism=9606
hsa-miR-196a-3p	MIMAT0004562	hsa-miR-196a*	343070	PRAMEF9	-0.6	http://www.microrna.org/microrna/getMrna.do?gene=343070&matureName=hsa-miR-196a*&organism=9606
hsa-miR-196a-3p	MIMAT0004562	hsa-miR-196a*	6921	TCEB1	-1.09	http://www.microrna.org/microrna/getMrna.do?gene=6921&matureName=hsa-miR-196a*&organism=9606
hsa-miR-196a-3p	MIMAT0004562	hsa-miR-196a*	2354	FOSB	-0.55	http://www.microrna.org/microrna/getMrna.do?gene=2354&matureName=hsa-miR-196a*&organism=9606
hsa-miR-196a-3p	MIMAT0004562	hsa-miR-196a*	79819	WDR78	-0.33	http://www.microrna.org/microrna/getMrna.do?gene=79819&matureName=hsa-miR-196a*&organism=9606
hsa-miR-196a-3p	MIMAT0004562	hsa-miR-196a*	130271	PLEKHH2	-0.16	http://www.microrna.org/microrna/getMrna.do?gene=130271&matureName=hsa-miR-196a*&organism=9606
hsa-miR-196a-3p	MIMAT0004562	hsa-miR-196a*	130271	PLEKHH2	-0.54	http://www.microrna.org/microrna/getMrna.do?gene=130271&matureName=hsa-miR-196a*&organism=9606
hsa-miR-196a-3p	MIMAT0004562	hsa-miR-196a*	220134	SKA1	-0.25	http://www.microrna.org/microrna/getMrna.do?gene=220134&matureName=hsa-miR-196a*&organism=9606
hsa-miR-196a-3p	MIMAT0004562	hsa-miR-196a*	54737	MPHOSPH8	-0.12	http://www.microrna.org/microrna/getMrna.do?gene=54737&matureName=hsa-miR-196a*&organism=9606
hsa-miR-196a-3p	MIMAT0004562	hsa-miR-196a*	60560	NAA35	-0.69	http://www.microrna.org/microrna/getMrna.do?gene=60560&matureName=hsa-miR-196a*&organism=9606
hsa-miR-196a-3p	MIMAT0004562	hsa-miR-196a*	162968	ZNF497	-0.14	http://www.microrna.org/microrna/getMrna.do?gene=162968&matureName=hsa-miR-196a*&organism=9606
hsa-miR-196a-3p	MIMAT0004562	hsa-miR-196a*	388512	CLEC17A	-0.37	http://www.microrna.org/microrna/getMrna.do?gene=388512&matureName=hsa-miR-196a*&organism=9606
hsa-miR-196a-3p	MIMAT0004562	hsa-miR-196a*	388512	CLEC17A	-0.1	http://www.microrna.org/microrna/getMrna.do?gene=388512&matureName=hsa-miR-196a*&organism=9606
hsa-miR-196a-3p	MIMAT0004562	hsa-miR-196a*	81027	TUBB1	-0.12	http://www.microrna.org/microrna/getMrna.do?gene=81027&matureName=hsa-miR-196a*&organism=9606
hsa-miR-196a-3p	MIMAT0004562	hsa-miR-196a*	343035	RD3	-0.35	http://www.microrna.org/microrna/getMrna.do?gene=343035&matureName=hsa-miR-196a*&organism=9606
hsa-miR-196a-3p	MIMAT0004562	hsa-miR-196a*	343035	RD3	-1.09	http://www.microrna.org/microrna/getMrna.do?gene=343035&matureName=hsa-miR-196a*&organism=9606
hsa-miR-196a-3p	MIMAT0004562	hsa-miR-196a*	100286844	LOC100286844	-0.53	http://www.microrna.org/microrna/getMrna.do?gene=100286844&matureName=hsa-miR-196a*&organism=9606
hsa-miR-196a-3p	MIMAT0004562	hsa-miR-196a*	55863	TMEM126B	-0.1	http://www.microrna.org/microrna/getMrna.do?gene=55863&matureName=hsa-miR-196a*&organism=9606
hsa-miR-196a-3p	MIMAT0004562	hsa-miR-196a*	55863	TMEM126B	-0.43	http://www.microrna.org/microrna/getMrna.do?gene=55863&matureName=hsa-miR-196a*&organism=9606
hsa-miR-196a-3p	MIMAT0004562	hsa-miR-196a*	9343	EFTUD2	-0.25	http://www.microrna.org/microrna/getMrna.do?gene=9343&matureName=hsa-miR-196a*&organism=9606
hsa-miR-196a-3p	MIMAT0004562	hsa-miR-196a*	4952	OCRL	-0.45	http://www.microrna.org/microrna/getMrna.do?gene=4952&matureName=hsa-miR-196a*&organism=9606
hsa-miR-196a-3p	MIMAT0004562	hsa-miR-196a*	30832	ZNF354C	-0.98	http://www.microrna.org/microrna/getMrna.do?gene=30832&matureName=hsa-miR-196a*&organism=9606
hsa-miR-196a-3p	MIMAT0004562	hsa-miR-196a*	3269	HRH1	-0.33	http://www.microrna.org/microrna/getMrna.do?gene=3269&matureName=hsa-miR-196a*&organism=9606
hsa-miR-196a-3p	MIMAT0004562	hsa-miR-196a*	6687	SPG7	-0.22	http://www.microrna.org/microrna/getMrna.do?gene=6687&matureName=hsa-miR-196a*&organism=9606
hsa-miR-196a-3p	MIMAT0004562	hsa-miR-196a*	728640	LOC728640	-1.19	http://www.microrna.org/microrna/getMrna.do?gene=728640&matureName=hsa-miR-196a*&organism=9606
hsa-miR-196a-3p	MIMAT0004562	hsa-miR-196a*	728640	LOC728640	-0.17	http://www.microrna.org/microrna/getMrna.do?gene=728640&matureName=hsa-miR-196a*&organism=9606
hsa-miR-196a-3p	MIMAT0004562	hsa-miR-196a*	5027	P2RX7	-0.44	http://www.microrna.org/microrna/getMrna.do?gene=5027&matureName=hsa-miR-196a*&organism=9606
hsa-miR-196a-3p	MIMAT0004562	hsa-miR-196a*	9678	PHF14	-0.12	http://www.microrna.org/microrna/getMrna.do?gene=9678&matureName=hsa-miR-196a*&organism=9606
hsa-miR-196a-3p	MIMAT0004562	hsa-miR-196a*	11154	AP4S1	-0.33	http://www.microrna.org/microrna/getMrna.do?gene=11154&matureName=hsa-miR-196a*&organism=9606
hsa-miR-196a-3p	MIMAT0004562	hsa-miR-196a*	100287932	TIMM23	-0.1	http://www.microrna.org/microrna/getMrna.do?gene=100287932&matureName=hsa-miR-196a*&organism=9606
hsa-miR-196a-3p	MIMAT0004562	hsa-miR-196a*	65055	REEP1	-0.5	http://www.microrna.org/microrna/getMrna.do?gene=65055&matureName=hsa-miR-196a*&organism=9606
hsa-miR-196a-3p	MIMAT0004562	hsa-miR-196a*	130827	TMEM182	-0.56	http://www.microrna.org/microrna/getMrna.do?gene=130827&matureName=hsa-miR-196a*&organism=9606
hsa-miR-196a-3p	MIMAT0004562	hsa-miR-196a*	130827	TMEM182	-0.13	http://www.microrna.org/microrna/getMrna.do?gene=130827&matureName=hsa-miR-196a*&organism=9606
hsa-miR-196a-3p	MIMAT0004562	hsa-miR-196a*	64799	IQCH	-1.23	http://www.microrna.org/microrna/getMrna.do?gene=64799&matureName=hsa-miR-196a*&organism=9606
hsa-miR-196a-3p	MIMAT0004562	hsa-miR-196a*	1001	CDH3	-0.1	http://www.microrna.org/microrna/getMrna.do?gene=1001&matureName=hsa-miR-196a*&organism=9606
hsa-miR-196a-3p	MIMAT0004562	hsa-miR-196a*	55022	PID1	-0.12	http://www.microrna.org/microrna/getMrna.do?gene=55022&matureName=hsa-miR-196a*&organism=9606
hsa-miR-196a-3p	MIMAT0004562	hsa-miR-196a*	119369	NUDT9P1	-0.51	http://www.microrna.org/microrna/getMrna.do?gene=119369&matureName=hsa-miR-196a*&organism=9606
hsa-miR-196a-3p	MIMAT0004562	hsa-miR-196a*	5792	PTPRF	-0.26	http://www.microrna.org/microrna/getMrna.do?gene=5792&matureName=hsa-miR-196a*&organism=9606
hsa-miR-196a-3p	MIMAT0004562	hsa-miR-196a*	9589	WTAP	-0.18	http://www.microrna.org/microrna/getMrna.do?gene=9589&matureName=hsa-miR-196a*&organism=9606
hsa-miR-196a-3p	MIMAT0004562	hsa-miR-196a*	56180	MOSPD1	-0.17	http://www.microrna.org/microrna/getMrna.do?gene=56180&matureName=hsa-miR-196a*&organism=9606
hsa-miR-196a-3p	MIMAT0004562	hsa-miR-196a*	22898	DENND3	-0.24	http://www.microrna.org/microrna/getMrna.do?gene=22898&matureName=hsa-miR-196a*&organism=9606
hsa-miR-196a-3p	MIMAT0004562	hsa-miR-196a*	128	ADH5	-0.64	http://www.microrna.org/microrna/getMrna.do?gene=128&matureName=hsa-miR-196a*&organism=9606
hsa-miR-196a-3p	MIMAT0004562	hsa-miR-196a*	128	ADH5	-0.19	http://www.microrna.org/microrna/getMrna.do?gene=128&matureName=hsa-miR-196a*&organism=9606
hsa-miR-196a-3p	MIMAT0004562	hsa-miR-196a*	64769	MEAF6	-0.17	http://www.microrna.org/microrna/getMrna.do?gene=64769&matureName=hsa-miR-196a*&organism=9606
hsa-miR-196a-3p	MIMAT0004562	hsa-miR-196a*	195814	SDR16C5	-0.87	http://www.microrna.org/microrna/getMrna.do?gene=195814&matureName=hsa-miR-196a*&organism=9606
hsa-miR-196a-3p	MIMAT0004562	hsa-miR-196a*	7844	RNF103	-0.32	http://www.microrna.org/microrna/getMrna.do?gene=7844&matureName=hsa-miR-196a*&organism=9606
hsa-miR-196a-3p	MIMAT0004562	hsa-miR-196a*	57511	COG6	-1	http://www.microrna.org/microrna/getMrna.do?gene=57511&matureName=hsa-miR-196a*&organism=9606
hsa-miR-196a-3p	MIMAT0004562	hsa-miR-196a*	11158	RABL2B	-0.25	http://www.microrna.org/microrna/getMrna.do?gene=11158&matureName=hsa-miR-196a*&organism=9606
hsa-miR-196a-3p	MIMAT0004562	hsa-miR-196a*	2028	ENPEP	-0.4	http://www.microrna.org/microrna/getMrna.do?gene=2028&matureName=hsa-miR-196a*&organism=9606
hsa-miR-196a-3p	MIMAT0004562	hsa-miR-196a*	23038	WDTC1	-0.11	http://www.microrna.org/microrna/getMrna.do?gene=23038&matureName=hsa-miR-196a*&organism=9606
hsa-miR-196a-3p	MIMAT0004562	hsa-miR-196a*	10919	EHMT2	-0.48	http://www.microrna.org/microrna/getMrna.do?gene=10919&matureName=hsa-miR-196a*&organism=9606
hsa-miR-196a-3p	MIMAT0004562	hsa-miR-196a*	4352	MPL	-0.15	http://www.microrna.org/microrna/getMrna.do?gene=4352&matureName=hsa-miR-196a*&organism=9606
hsa-miR-196a-3p	MIMAT0004562	hsa-miR-196a*	23177	CEP68	-0.12	http://www.microrna.org/microrna/getMrna.do?gene=23177&matureName=hsa-miR-196a*&organism=9606
hsa-miR-196a-3p	MIMAT0004562	hsa-miR-196a*	390535	GOLGA8E	-0.3	http://www.microrna.org/microrna/getMrna.do?gene=390535&matureName=hsa-miR-196a*&organism=9606
hsa-miR-196a-3p	MIMAT0004562	hsa-miR-196a*	222068	TMED4	-0.39	http://www.microrna.org/microrna/getMrna.do?gene=222068&matureName=hsa-miR-196a*&organism=9606
hsa-miR-196a-3p	MIMAT0004562	hsa-miR-196a*	8907	AP1M1	-0.58	http://www.microrna.org/microrna/getMrna.do?gene=8907&matureName=hsa-miR-196a*&organism=9606
hsa-miR-196a-3p	MIMAT0004562	hsa-miR-196a*	26505	CNNM3	-0.18	http://www.microrna.org/microrna/getMrna.do?gene=26505&matureName=hsa-miR-196a*&organism=9606
hsa-miR-196a-3p	MIMAT0004562	hsa-miR-196a*	51573	GDE1	-0.21	http://www.microrna.org/microrna/getMrna.do?gene=51573&matureName=hsa-miR-196a*&organism=9606
hsa-miR-196a-3p	MIMAT0004562	hsa-miR-196a*	28973	MRPS18B	-0.89	http://www.microrna.org/microrna/getMrna.do?gene=28973&matureName=hsa-miR-196a*&organism=9606
hsa-miR-196a-3p	MIMAT0004562	hsa-miR-196a*	2824	GPM6B	-1.13	http://www.microrna.org/microrna/getMrna.do?gene=2824&matureName=hsa-miR-196a*&organism=9606
hsa-miR-196a-3p	MIMAT0004562	hsa-miR-196a*	84629	TNRC18	-0.13	http://www.microrna.org/microrna/getMrna.do?gene=84629&matureName=hsa-miR-196a*&organism=9606
hsa-miR-196a-3p	MIMAT0004562	hsa-miR-196a*	84629	TNRC18	-0.14	http://www.microrna.org/microrna/getMrna.do?gene=84629&matureName=hsa-miR-196a*&organism=9606
hsa-miR-196a-3p	MIMAT0004562	hsa-miR-196a*	22835	ZFP30	-0.42	http://www.microrna.org/microrna/getMrna.do?gene=22835&matureName=hsa-miR-196a*&organism=9606
hsa-miR-196a-3p	MIMAT0004562	hsa-miR-196a*	100133612	LOC100133612	-0.69	http://www.microrna.org/microrna/getMrna.do?gene=100133612&matureName=hsa-miR-196a*&organism=9606
hsa-miR-196a-3p	MIMAT0004562	hsa-miR-196a*	100133612	LOC100133612	-0.59	http://www.microrna.org/microrna/getMrna.do?gene=100133612&matureName=hsa-miR-196a*&organism=9606
hsa-miR-196a-3p	MIMAT0004562	hsa-miR-196a*	1163	CKS1B	-1.15	http://www.microrna.org/microrna/getMrna.do?gene=1163&matureName=hsa-miR-196a*&organism=9606
hsa-miR-196a-3p	MIMAT0004562	hsa-miR-196a*	6872	TAF1	-1	http://www.microrna.org/microrna/getMrna.do?gene=6872&matureName=hsa-miR-196a*&organism=9606
hsa-miR-196a-3p	MIMAT0004562	hsa-miR-196a*	6935	ZEB1	-1	http://www.microrna.org/microrna/getMrna.do?gene=6935&matureName=hsa-miR-196a*&organism=9606
hsa-miR-196a-3p	MIMAT0004562	hsa-miR-196a*	132203	SNTN	-0.2	http://www.microrna.org/microrna/getMrna.do?gene=132203&matureName=hsa-miR-196a*&organism=9606
hsa-miR-196a-3p	MIMAT0004562	hsa-miR-196a*	7466	WFS1	-0.29	http://www.microrna.org/microrna/getMrna.do?gene=7466&matureName=hsa-miR-196a*&organism=9606
hsa-miR-196a-3p	MIMAT0004562	hsa-miR-196a*	79867	TCTN2	-0.28	http://www.microrna.org/microrna/getMrna.do?gene=79867&matureName=hsa-miR-196a*&organism=9606
hsa-miR-196a-3p	MIMAT0004562	hsa-miR-196a*	79867	TCTN2	-0.16	http://www.microrna.org/microrna/getMrna.do?gene=79867&matureName=hsa-miR-196a*&organism=9606
hsa-miR-196a-3p	MIMAT0004562	hsa-miR-196a*	3632	INPP5A	-0.26	http://www.microrna.org/microrna/getMrna.do?gene=3632&matureName=hsa-miR-196a*&organism=9606
hsa-miR-196a-3p	MIMAT0004562	hsa-miR-196a*	255631	COL24A1	-0.4	http://www.microrna.org/microrna/getMrna.do?gene=255631&matureName=hsa-miR-196a*&organism=9606
hsa-miR-196a-3p	MIMAT0004562	hsa-miR-196a*	9581	PREPL	-0.64	http://www.microrna.org/microrna/getMrna.do?gene=9581&matureName=hsa-miR-196a*&organism=9606
hsa-miR-196a-3p	MIMAT0004562	hsa-miR-196a*	1601	DAB2	-0.88	http://www.microrna.org/microrna/getMrna.do?gene=1601&matureName=hsa-miR-196a*&organism=9606
hsa-miR-196a-3p	MIMAT0004562	hsa-miR-196a*	140	ADORA3	-1.26	http://www.microrna.org/microrna/getMrna.do?gene=140&matureName=hsa-miR-196a*&organism=9606
hsa-miR-196a-3p	MIMAT0004562	hsa-miR-196a*	11166	SOX21	-0.1	http://www.microrna.org/microrna/getMrna.do?gene=11166&matureName=hsa-miR-196a*&organism=9606
hsa-miR-196a-3p	MIMAT0004562	hsa-miR-196a*	341640	FREM2	-0.1	http://www.microrna.org/microrna/getMrna.do?gene=341640&matureName=hsa-miR-196a*&organism=9606
hsa-miR-196a-3p	MIMAT0004562	hsa-miR-196a*	5357	PLS1	-0.11	http://www.microrna.org/microrna/getMrna.do?gene=5357&matureName=hsa-miR-196a*&organism=9606
hsa-miR-196a-3p	MIMAT0004562	hsa-miR-196a*	26118	WSB1	-0.55	http://www.microrna.org/microrna/getMrna.do?gene=26118&matureName=hsa-miR-196a*&organism=9606
hsa-miR-196a-3p	MIMAT0004562	hsa-miR-196a*	79691	QTRTD1	-0.1	http://www.microrna.org/microrna/getMrna.do?gene=79691&matureName=hsa-miR-196a*&organism=9606
hsa-miR-196a-3p	MIMAT0004562	hsa-miR-196a*	23114	NFASC	-0.18	http://www.microrna.org/microrna/getMrna.do?gene=23114&matureName=hsa-miR-196a*&organism=9606
hsa-miR-196a-3p	MIMAT0004562	hsa-miR-196a*	7157	TP53	-0.13	http://www.microrna.org/microrna/getMrna.do?gene=7157&matureName=hsa-miR-196a*&organism=9606
hsa-miR-196a-3p	MIMAT0004562	hsa-miR-196a*	340527	NHSL2	-0.94	http://www.microrna.org/microrna/getMrna.do?gene=340527&matureName=hsa-miR-196a*&organism=9606
hsa-miR-196a-3p	MIMAT0004562	hsa-miR-196a*	9616	RNF7	-0.97	http://www.microrna.org/microrna/getMrna.do?gene=9616&matureName=hsa-miR-196a*&organism=9606
hsa-miR-196a-3p	MIMAT0004562	hsa-miR-196a*	9669	EIF5B	-0.37	http://www.microrna.org/microrna/getMrna.do?gene=9669&matureName=hsa-miR-196a*&organism=9606
hsa-miR-196a-3p	MIMAT0004562	hsa-miR-196a*	55088	C10orf118	-0.28	http://www.microrna.org/microrna/getMrna.do?gene=55088&matureName=hsa-miR-196a*&organism=9606
hsa-miR-196a-3p	MIMAT0004562	hsa-miR-196a*	100133091	LOC100133091	-0.1	http://www.microrna.org/microrna/getMrna.do?gene=100133091&matureName=hsa-miR-196a*&organism=9606
hsa-miR-196a-3p	MIMAT0004562	hsa-miR-196a*	55119	PRPF38B	-0.18	http://www.microrna.org/microrna/getMrna.do?gene=55119&matureName=hsa-miR-196a*&organism=9606
hsa-miR-196a-3p	MIMAT0004562	hsa-miR-196a*	221895	JAZF1	-1.01	http://www.microrna.org/microrna/getMrna.do?gene=221895&matureName=hsa-miR-196a*&organism=9606
hsa-miR-196a-3p	MIMAT0004562	hsa-miR-196a*	64895	PAPOLG	-1.03	http://www.microrna.org/microrna/getMrna.do?gene=64895&matureName=hsa-miR-196a*&organism=9606
hsa-miR-196a-3p	MIMAT0004562	hsa-miR-196a*	8545	CGGBP1	-0.53	http://www.microrna.org/microrna/getMrna.do?gene=8545&matureName=hsa-miR-196a*&organism=9606
hsa-miR-196a-3p	MIMAT0004562	hsa-miR-196a*	8741	TNFSF13	-0.26	http://www.microrna.org/microrna/getMrna.do?gene=8741&matureName=hsa-miR-196a*&organism=9606
hsa-miR-196a-3p	MIMAT0004562	hsa-miR-196a*	54805	CNNM2	-0.22	http://www.microrna.org/microrna/getMrna.do?gene=54805&matureName=hsa-miR-196a*&organism=9606
hsa-miR-196a-3p	MIMAT0004562	hsa-miR-196a*	222256	CDHR3	-0.76	http://www.microrna.org/microrna/getMrna.do?gene=222256&matureName=hsa-miR-196a*&organism=9606
hsa-miR-196a-3p	MIMAT0004562	hsa-miR-196a*	23421	ITGB3BP	-0.13	http://www.microrna.org/microrna/getMrna.do?gene=23421&matureName=hsa-miR-196a*&organism=9606
hsa-miR-196a-3p	MIMAT0004562	hsa-miR-196a*	285025	CCDC141	-0.11	http://www.microrna.org/microrna/getMrna.do?gene=285025&matureName=hsa-miR-196a*&organism=9606
hsa-miR-196a-3p	MIMAT0004562	hsa-miR-196a*	23500	DAAM2	-0.15	http://www.microrna.org/microrna/getMrna.do?gene=23500&matureName=hsa-miR-196a*&organism=9606
hsa-miR-196a-3p	MIMAT0004562	hsa-miR-196a*	155400	NSUN5P1	-0.1	http://www.microrna.org/microrna/getMrna.do?gene=155400&matureName=hsa-miR-196a*&organism=9606
hsa-miR-196a-3p	MIMAT0004562	hsa-miR-196a*	260294	NSUN5P2	-0.13	http://www.microrna.org/microrna/getMrna.do?gene=260294&matureName=hsa-miR-196a*&organism=9606
hsa-miR-196a-3p	MIMAT0004562	hsa-miR-196a*	9039	UBA3	-0.99	http://www.microrna.org/microrna/getMrna.do?gene=9039&matureName=hsa-miR-196a*&organism=9606
hsa-miR-196a-3p	MIMAT0004562	hsa-miR-196a*	6134	RPL10	-0.16	http://www.microrna.org/microrna/getMrna.do?gene=6134&matureName=hsa-miR-196a*&organism=9606
hsa-miR-196a-3p	MIMAT0004562	hsa-miR-196a*	54433	GAR1	-0.12	http://www.microrna.org/microrna/getMrna.do?gene=54433&matureName=hsa-miR-196a*&organism=9606
hsa-miR-196a-3p	MIMAT0004562	hsa-miR-196a*	139425	DCAF8L1	-0.21	http://www.microrna.org/microrna/getMrna.do?gene=139425&matureName=hsa-miR-196a*&organism=9606
hsa-miR-196a-3p	MIMAT0004562	hsa-miR-196a*	139425	DCAF8L1	-0.12	http://www.microrna.org/microrna/getMrna.do?gene=139425&matureName=hsa-miR-196a*&organism=9606
hsa-miR-196a-3p	MIMAT0004562	hsa-miR-196a*	27436	EML4	-0.35	http://www.microrna.org/microrna/getMrna.do?gene=27436&matureName=hsa-miR-196a*&organism=9606
hsa-miR-196a-3p	MIMAT0004562	hsa-miR-196a*	9459	ARHGEF6	-0.22	http://www.microrna.org/microrna/getMrna.do?gene=9459&matureName=hsa-miR-196a*&organism=9606
hsa-miR-196a-3p	MIMAT0004562	hsa-miR-196a*	687	KLF9	-0.11	http://www.microrna.org/microrna/getMrna.do?gene=687&matureName=hsa-miR-196a*&organism=9606
hsa-miR-196a-3p	MIMAT0004562	hsa-miR-196a*	57176	VARS2	-0.13	http://www.microrna.org/microrna/getMrna.do?gene=57176&matureName=hsa-miR-196a*&organism=9606
hsa-miR-196a-3p	MIMAT0004562	hsa-miR-196a*	160851	DGKH	-0.14	http://www.microrna.org/microrna/getMrna.do?gene=160851&matureName=hsa-miR-196a*&organism=9606
hsa-miR-196a-3p	MIMAT0004562	hsa-miR-196a*	288	ANK3	-0.18	http://www.microrna.org/microrna/getMrna.do?gene=288&matureName=hsa-miR-196a*&organism=9606
hsa-miR-196a-3p	MIMAT0004562	hsa-miR-196a*	65008	MRPL1	-0.99	http://www.microrna.org/microrna/getMrna.do?gene=65008&matureName=hsa-miR-196a*&organism=9606
hsa-miR-196a-3p	MIMAT0004562	hsa-miR-196a*	27253	PCDH17	-0.36	http://www.microrna.org/microrna/getMrna.do?gene=27253&matureName=hsa-miR-196a*&organism=9606
hsa-miR-196a-3p	MIMAT0004562	hsa-miR-196a*	27253	PCDH17	-0.14	http://www.microrna.org/microrna/getMrna.do?gene=27253&matureName=hsa-miR-196a*&organism=9606
hsa-miR-196a-3p	MIMAT0004562	hsa-miR-196a*	2332	FMR1	-0.16	http://www.microrna.org/microrna/getMrna.do?gene=2332&matureName=hsa-miR-196a*&organism=9606
hsa-miR-196a-3p	MIMAT0004562	hsa-miR-196a*	81551	STMN4	-1.18	http://www.microrna.org/microrna/getMrna.do?gene=81551&matureName=hsa-miR-196a*&organism=9606
hsa-miR-196a-3p	MIMAT0004562	hsa-miR-196a*	55335	NIPSNAP3B	-0.15	http://www.microrna.org/microrna/getMrna.do?gene=55335&matureName=hsa-miR-196a*&organism=9606
hsa-miR-196a-3p	MIMAT0004562	hsa-miR-196a*	22979	EFR3B	-0.11	http://www.microrna.org/microrna/getMrna.do?gene=22979&matureName=hsa-miR-196a*&organism=9606
hsa-miR-196a-3p	MIMAT0004562	hsa-miR-196a*	10772	SFRS13A	-0.14	http://www.microrna.org/microrna/getMrna.do?gene=10772&matureName=hsa-miR-196a*&organism=9606
hsa-miR-196a-3p	MIMAT0004562	hsa-miR-196a*	8737	RIPK1	-0.12	http://www.microrna.org/microrna/getMrna.do?gene=8737&matureName=hsa-miR-196a*&organism=9606
hsa-miR-196a-3p	MIMAT0004562	hsa-miR-196a*	6161	RPL32	-0.15	http://www.microrna.org/microrna/getMrna.do?gene=6161&matureName=hsa-miR-196a*&organism=9606
hsa-miR-196a-3p	MIMAT0004562	hsa-miR-196a*	9241	NOG	-0.25	http://www.microrna.org/microrna/getMrna.do?gene=9241&matureName=hsa-miR-196a*&organism=9606
hsa-miR-196a-3p	MIMAT0004562	hsa-miR-196a*	7251	TSG101	-0.68	http://www.microrna.org/microrna/getMrna.do?gene=7251&matureName=hsa-miR-196a*&organism=9606
hsa-miR-196a-3p	MIMAT0004562	hsa-miR-196a*	125144	NCRNA00188	-0.26	http://www.microrna.org/microrna/getMrna.do?gene=125144&matureName=hsa-miR-196a*&organism=9606
hsa-miR-196a-3p	MIMAT0004562	hsa-miR-196a*	5926	ARID4A	-0.22	http://www.microrna.org/microrna/getMrna.do?gene=5926&matureName=hsa-miR-196a*&organism=9606
hsa-miR-196a-3p	MIMAT0004562	hsa-miR-196a*	5926	ARID4A	-0.16	http://www.microrna.org/microrna/getMrna.do?gene=5926&matureName=hsa-miR-196a*&organism=9606
hsa-miR-196a-3p	MIMAT0004562	hsa-miR-196a*	22866	CNKSR2	-0.19	http://www.microrna.org/microrna/getMrna.do?gene=22866&matureName=hsa-miR-196a*&organism=9606
hsa-miR-196a-3p	MIMAT0004562	hsa-miR-196a*	256643	CXorf23	-0.16	http://www.microrna.org/microrna/getMrna.do?gene=256643&matureName=hsa-miR-196a*&organism=9606
hsa-miR-196a-3p	MIMAT0004562	hsa-miR-196a*	56658	TRIM39	-1.03	http://www.microrna.org/microrna/getMrna.do?gene=56658&matureName=hsa-miR-196a*&organism=9606
hsa-miR-196a-3p	MIMAT0004562	hsa-miR-196a*	26503	SLC17A5	-0.16	http://www.microrna.org/microrna/getMrna.do?gene=26503&matureName=hsa-miR-196a*&organism=9606
hsa-miR-196a-3p	MIMAT0004562	hsa-miR-196a*	4223	MEOX2	-0.25	http://www.microrna.org/microrna/getMrna.do?gene=4223&matureName=hsa-miR-196a*&organism=9606
hsa-miR-196a-3p	MIMAT0004562	hsa-miR-196a*	83987	CCDC8	-0.13	http://www.microrna.org/microrna/getMrna.do?gene=83987&matureName=hsa-miR-196a*&organism=9606
hsa-miR-196a-3p	MIMAT0004562	hsa-miR-196a*	284260	LOC284260	-0.11	http://www.microrna.org/microrna/getMrna.do?gene=284260&matureName=hsa-miR-196a*&organism=9606
hsa-miR-196a-3p	MIMAT0004562	hsa-miR-196a*	9891	NUAK1	-0.77	http://www.microrna.org/microrna/getMrna.do?gene=9891&matureName=hsa-miR-196a*&organism=9606
hsa-miR-196a-3p	MIMAT0004562	hsa-miR-196a*	57551	TAOK1	-0.11	http://www.microrna.org/microrna/getMrna.do?gene=57551&matureName=hsa-miR-196a*&organism=9606
hsa-miR-196a-3p	MIMAT0004562	hsa-miR-196a*	2867	FFAR2	-0.61	http://www.microrna.org/microrna/getMrna.do?gene=2867&matureName=hsa-miR-196a*&organism=9606
hsa-miR-196a-3p	MIMAT0004562	hsa-miR-196a*	5494	PPM1A	-0.26	http://www.microrna.org/microrna/getMrna.do?gene=5494&matureName=hsa-miR-196a*&organism=9606
hsa-miR-196a-3p	MIMAT0004562	hsa-miR-196a*	114876	OSBPL1A	-0.52	http://www.microrna.org/microrna/getMrna.do?gene=114876&matureName=hsa-miR-196a*&organism=9606
hsa-miR-196a-3p	MIMAT0004562	hsa-miR-196a*	65124	ANKRD57	-0.51	http://www.microrna.org/microrna/getMrna.do?gene=65124&matureName=hsa-miR-196a*&organism=9606
hsa-miR-196a-3p	MIMAT0004562	hsa-miR-196a*	85414	SLC45A3	-0.29	http://www.microrna.org/microrna/getMrna.do?gene=85414&matureName=hsa-miR-196a*&organism=9606
hsa-miR-196a-3p	MIMAT0004562	hsa-miR-196a*	9886	RHOBTB1	-0.75	http://www.microrna.org/microrna/getMrna.do?gene=9886&matureName=hsa-miR-196a*&organism=9606
hsa-miR-196a-3p	MIMAT0004562	hsa-miR-196a*	54676	GTPBP2	-0.38	http://www.microrna.org/microrna/getMrna.do?gene=54676&matureName=hsa-miR-196a*&organism=9606
hsa-miR-196a-3p	MIMAT0004562	hsa-miR-196a*	54676	GTPBP2	-1.03	http://www.microrna.org/microrna/getMrna.do?gene=54676&matureName=hsa-miR-196a*&organism=9606
hsa-miR-196a-3p	MIMAT0004562	hsa-miR-196a*	10733	PLK4	-0.98	http://www.microrna.org/microrna/getMrna.do?gene=10733&matureName=hsa-miR-196a*&organism=9606
hsa-miR-196a-3p	MIMAT0004562	hsa-miR-196a*	10973	ASCC3	-1.3	http://www.microrna.org/microrna/getMrna.do?gene=10973&matureName=hsa-miR-196a*&organism=9606
hsa-miR-196a-3p	MIMAT0004562	hsa-miR-196a*	154091	SLC2A12	-0.52	http://www.microrna.org/microrna/getMrna.do?gene=154091&matureName=hsa-miR-196a*&organism=9606
hsa-miR-196a-3p	MIMAT0004562	hsa-miR-196a*	27297	CRCP	-0.18	http://www.microrna.org/microrna/getMrna.do?gene=27297&matureName=hsa-miR-196a*&organism=9606
hsa-miR-196a-3p	MIMAT0004562	hsa-miR-196a*	440270	GOLGA8B	-0.12	http://www.microrna.org/microrna/getMrna.do?gene=440270&matureName=hsa-miR-196a*&organism=9606
hsa-miR-196a-3p	MIMAT0004562	hsa-miR-196a*	1984	EIF5A	-0.23	http://www.microrna.org/microrna/getMrna.do?gene=1984&matureName=hsa-miR-196a*&organism=9606
hsa-miR-196a-3p	MIMAT0004562	hsa-miR-196a*	100132984	LOC100132984	-0.21	http://www.microrna.org/microrna/getMrna.do?gene=100132984&matureName=hsa-miR-196a*&organism=9606
hsa-miR-196a-3p	MIMAT0004562	hsa-miR-196a*	282973	JAKMIP3	-0.29	http://www.microrna.org/microrna/getMrna.do?gene=282973&matureName=hsa-miR-196a*&organism=9606
hsa-miR-196a-3p	MIMAT0004562	hsa-miR-196a*	23503	ZFYVE26	-0.12	http://www.microrna.org/microrna/getMrna.do?gene=23503&matureName=hsa-miR-196a*&organism=9606
hsa-miR-196a-3p	MIMAT0004562	hsa-miR-196a*	23503	ZFYVE26	-0.87	http://www.microrna.org/microrna/getMrna.do?gene=23503&matureName=hsa-miR-196a*&organism=9606
hsa-miR-196a-3p	MIMAT0004562	hsa-miR-196a*	10842	C7orf16	-0.17	http://www.microrna.org/microrna/getMrna.do?gene=10842&matureName=hsa-miR-196a*&organism=9606
hsa-miR-196a-3p	MIMAT0004562	hsa-miR-196a*	23264	ZC3H7B	-0.19	http://www.microrna.org/microrna/getMrna.do?gene=23264&matureName=hsa-miR-196a*&organism=9606
hsa-miR-196a-3p	MIMAT0004562	hsa-miR-196a*	9988	DMTF1	-0.44	http://www.microrna.org/microrna/getMrna.do?gene=9988&matureName=hsa-miR-196a*&organism=9606
hsa-miR-196a-3p	MIMAT0004562	hsa-miR-196a*	55862	ECHDC1	-0.67	http://www.microrna.org/microrna/getMrna.do?gene=55862&matureName=hsa-miR-196a*&organism=9606
hsa-miR-196a-3p	MIMAT0004562	hsa-miR-196a*	157680	VPS13B	-0.29	http://www.microrna.org/microrna/getMrna.do?gene=157680&matureName=hsa-miR-196a*&organism=9606
hsa-miR-196a-3p	MIMAT0004562	hsa-miR-196a*	944	TNFSF8	-0.16	http://www.microrna.org/microrna/getMrna.do?gene=944&matureName=hsa-miR-196a*&organism=9606
hsa-miR-196a-3p	MIMAT0004562	hsa-miR-196a*	23181	DIP2A	-0.48	http://www.microrna.org/microrna/getMrna.do?gene=23181&matureName=hsa-miR-196a*&organism=9606
hsa-miR-196a-3p	MIMAT0004562	hsa-miR-196a*	57554	LRRC7	-0.15	http://www.microrna.org/microrna/getMrna.do?gene=57554&matureName=hsa-miR-196a*&organism=9606
hsa-miR-196a-3p	MIMAT0004562	hsa-miR-196a*	22854	NTNG1	-0.14	http://www.microrna.org/microrna/getMrna.do?gene=22854&matureName=hsa-miR-196a*&organism=9606
hsa-miR-196a-3p	MIMAT0004562	hsa-miR-196a*	140803	TRPM6	-0.44	http://www.microrna.org/microrna/getMrna.do?gene=140803&matureName=hsa-miR-196a*&organism=9606
hsa-miR-196a-3p	MIMAT0004562	hsa-miR-196a*	51313	FAM198B	-0.92	http://www.microrna.org/microrna/getMrna.do?gene=51313&matureName=hsa-miR-196a*&organism=9606
hsa-miR-196a-3p	MIMAT0004562	hsa-miR-196a*	115701	ALPK2	-0.43	http://www.microrna.org/microrna/getMrna.do?gene=115701&matureName=hsa-miR-196a*&organism=9606
hsa-miR-196a-3p	MIMAT0004562	hsa-miR-196a*	159090	FAM122B	-0.42	http://www.microrna.org/microrna/getMrna.do?gene=159090&matureName=hsa-miR-196a*&organism=9606
hsa-miR-196a-3p	MIMAT0004562	hsa-miR-196a*	159090	FAM122B	-0.4	http://www.microrna.org/microrna/getMrna.do?gene=159090&matureName=hsa-miR-196a*&organism=9606
hsa-miR-196a-3p	MIMAT0004562	hsa-miR-196a*	7916	BAT2	-0.15	http://www.microrna.org/microrna/getMrna.do?gene=7916&matureName=hsa-miR-196a*&organism=9606
hsa-miR-196a-3p	MIMAT0004562	hsa-miR-196a*	114823	LENG8	-1	http://www.microrna.org/microrna/getMrna.do?gene=114823&matureName=hsa-miR-196a*&organism=9606
hsa-miR-196a-3p	MIMAT0004562	hsa-miR-196a*	65988	ZNF747	-0.16	http://www.microrna.org/microrna/getMrna.do?gene=65988&matureName=hsa-miR-196a*&organism=9606
hsa-miR-196a-3p	MIMAT0004562	hsa-miR-196a*	29088	MRPL15	-0.39	http://www.microrna.org/microrna/getMrna.do?gene=29088&matureName=hsa-miR-196a*&organism=9606
hsa-miR-196a-3p	MIMAT0004562	hsa-miR-196a*	54940	OCIAD1	-0.33	http://www.microrna.org/microrna/getMrna.do?gene=54940&matureName=hsa-miR-196a*&organism=9606
hsa-miR-196a-3p	MIMAT0004562	hsa-miR-196a*	9129	PRPF3	-0.56	http://www.microrna.org/microrna/getMrna.do?gene=9129&matureName=hsa-miR-196a*&organism=9606
hsa-miR-196a-3p	MIMAT0004562	hsa-miR-196a*	8835	SOCS2	-0.45	http://www.microrna.org/microrna/getMrna.do?gene=8835&matureName=hsa-miR-196a*&organism=9606
hsa-miR-196a-3p	MIMAT0004562	hsa-miR-196a*	6252	RTN1	-0.34	http://www.microrna.org/microrna/getMrna.do?gene=6252&matureName=hsa-miR-196a*&organism=9606
hsa-miR-196a-3p	MIMAT0004562	hsa-miR-196a*	2186	BPTF	-0.45	http://www.microrna.org/microrna/getMrna.do?gene=2186&matureName=hsa-miR-196a*&organism=9606
hsa-miR-196a-3p	MIMAT0004562	hsa-miR-196a*	2186	BPTF	-0.33	http://www.microrna.org/microrna/getMrna.do?gene=2186&matureName=hsa-miR-196a*&organism=9606
hsa-miR-196a-3p	MIMAT0004562	hsa-miR-196a*	9948	WDR1	-0.59	http://www.microrna.org/microrna/getMrna.do?gene=9948&matureName=hsa-miR-196a*&organism=9606
hsa-miR-196a-3p	MIMAT0004562	hsa-miR-196a*	2549	GAB1	-0.1	http://www.microrna.org/microrna/getMrna.do?gene=2549&matureName=hsa-miR-196a*&organism=9606
hsa-miR-196a-3p	MIMAT0004562	hsa-miR-196a*	151651	EFHB	-0.19	http://www.microrna.org/microrna/getMrna.do?gene=151651&matureName=hsa-miR-196a*&organism=9606
hsa-miR-196a-3p	MIMAT0004562	hsa-miR-196a*	143425	SYT9	-0.12	http://www.microrna.org/microrna/getMrna.do?gene=143425&matureName=hsa-miR-196a*&organism=9606
hsa-miR-196a-3p	MIMAT0004562	hsa-miR-196a*	4698	NDUFA5	-0.62	http://www.microrna.org/microrna/getMrna.do?gene=4698&matureName=hsa-miR-196a*&organism=9606
hsa-miR-196a-3p	MIMAT0004562	hsa-miR-196a*	4684	NCAM1	-0.11	http://www.microrna.org/microrna/getMrna.do?gene=4684&matureName=hsa-miR-196a*&organism=9606
hsa-miR-196a-3p	MIMAT0004562	hsa-miR-196a*	8760	CDS2	-0.41	http://www.microrna.org/microrna/getMrna.do?gene=8760&matureName=hsa-miR-196a*&organism=9606
hsa-miR-196a-3p	MIMAT0004562	hsa-miR-196a*	340547	VSIG1	-0.28	http://www.microrna.org/microrna/getMrna.do?gene=340547&matureName=hsa-miR-196a*&organism=9606
hsa-miR-196a-3p	MIMAT0004562	hsa-miR-196a*	26959	HBP1	-1.13	http://www.microrna.org/microrna/getMrna.do?gene=26959&matureName=hsa-miR-196a*&organism=9606
hsa-miR-196a-3p	MIMAT0004562	hsa-miR-196a*	5087	PBX1	-0.16	http://www.microrna.org/microrna/getMrna.do?gene=5087&matureName=hsa-miR-196a*&organism=9606
hsa-miR-196a-3p	MIMAT0004562	hsa-miR-196a*	84133	ZNRF3	-0.47	http://www.microrna.org/microrna/getMrna.do?gene=84133&matureName=hsa-miR-196a*&organism=9606
hsa-miR-196a-3p	MIMAT0004562	hsa-miR-196a*	9616	RNF7	-1.08	http://www.microrna.org/microrna/getMrna.do?gene=9616&matureName=hsa-miR-196a*&organism=9606
hsa-miR-196a-3p	MIMAT0004562	hsa-miR-196a*	3832	KIF11	-0.45	http://www.microrna.org/microrna/getMrna.do?gene=3832&matureName=hsa-miR-196a*&organism=9606
hsa-miR-196a-3p	MIMAT0004562	hsa-miR-196a*	63935	PCIF1	-0.58	http://www.microrna.org/microrna/getMrna.do?gene=63935&matureName=hsa-miR-196a*&organism=9606
hsa-miR-196a-3p	MIMAT0004562	hsa-miR-196a*	1959	EGR2	-0.11	http://www.microrna.org/microrna/getMrna.do?gene=1959&matureName=hsa-miR-196a*&organism=9606
hsa-miR-196a-3p	MIMAT0004562	hsa-miR-196a*	902	CCNH	-0.22	http://www.microrna.org/microrna/getMrna.do?gene=902&matureName=hsa-miR-196a*&organism=9606
hsa-miR-196a-3p	MIMAT0004562	hsa-miR-196a*	64083	GOLPH3	-0.51	http://www.microrna.org/microrna/getMrna.do?gene=64083&matureName=hsa-miR-196a*&organism=9606
hsa-miR-196a-3p	MIMAT0004562	hsa-miR-196a*	55196	C12orf35	-0.17	http://www.microrna.org/microrna/getMrna.do?gene=55196&matureName=hsa-miR-196a*&organism=9606
hsa-miR-196a-3p	MIMAT0004562	hsa-miR-196a*	996	CDC27	-0.9	http://www.microrna.org/microrna/getMrna.do?gene=996&matureName=hsa-miR-196a*&organism=9606
hsa-miR-196a-3p	MIMAT0004562	hsa-miR-196a*	84085	FBXO30	-0.26	http://www.microrna.org/microrna/getMrna.do?gene=84085&matureName=hsa-miR-196a*&organism=9606
hsa-miR-196a-3p	MIMAT0004562	hsa-miR-196a*	58191	CXCL16	-0.19	http://www.microrna.org/microrna/getMrna.do?gene=58191&matureName=hsa-miR-196a*&organism=9606
hsa-miR-196a-3p	MIMAT0004562	hsa-miR-196a*	1677	DFFB	-0.24	http://www.microrna.org/microrna/getMrna.do?gene=1677&matureName=hsa-miR-196a*&organism=9606
hsa-miR-196a-3p	MIMAT0004562	hsa-miR-196a*	89932	PAPLN	-0.11	http://www.microrna.org/microrna/getMrna.do?gene=89932&matureName=hsa-miR-196a*&organism=9606
hsa-miR-196a-3p	MIMAT0004562	hsa-miR-196a*	153201	SLC36A2	-0.19	http://www.microrna.org/microrna/getMrna.do?gene=153201&matureName=hsa-miR-196a*&organism=9606
hsa-miR-196a-3p	MIMAT0004562	hsa-miR-196a*	64863	METTL4	-0.82	http://www.microrna.org/microrna/getMrna.do?gene=64863&matureName=hsa-miR-196a*&organism=9606
hsa-miR-196a-3p	MIMAT0004562	hsa-miR-196a*	4154	MBNL1	-0.46	http://www.microrna.org/microrna/getMrna.do?gene=4154&matureName=hsa-miR-196a*&organism=9606
hsa-miR-196a-3p	MIMAT0004562	hsa-miR-196a*	9060	PAPSS2	-1.21	http://www.microrna.org/microrna/getMrna.do?gene=9060&matureName=hsa-miR-196a*&organism=9606
hsa-miR-196a-3p	MIMAT0004562	hsa-miR-196a*	79944	L2HGDH	-0.35	http://www.microrna.org/microrna/getMrna.do?gene=79944&matureName=hsa-miR-196a*&organism=9606
hsa-miR-196a-3p	MIMAT0004562	hsa-miR-196a*	23660	ZKSCAN5	-0.15	http://www.microrna.org/microrna/getMrna.do?gene=23660&matureName=hsa-miR-196a*&organism=9606
hsa-miR-196a-3p	MIMAT0004562	hsa-miR-196a*	2073	ERCC5	-0.11	http://www.microrna.org/microrna/getMrna.do?gene=2073&matureName=hsa-miR-196a*&organism=9606
hsa-miR-196a-3p	MIMAT0004562	hsa-miR-196a*	5931	RBBP7	-0.13	http://www.microrna.org/microrna/getMrna.do?gene=5931&matureName=hsa-miR-196a*&organism=9606
hsa-miR-196a-3p	MIMAT0004562	hsa-miR-196a*	10114	HIPK3	-1.07	http://www.microrna.org/microrna/getMrna.do?gene=10114&matureName=hsa-miR-196a*&organism=9606
hsa-miR-196a-3p	MIMAT0004562	hsa-miR-196a*	3149	HMGB3	-0.22	http://www.microrna.org/microrna/getMrna.do?gene=3149&matureName=hsa-miR-196a*&organism=9606
hsa-miR-196a-3p	MIMAT0004562	hsa-miR-196a*	152189	CMTM8	-0.36	http://www.microrna.org/microrna/getMrna.do?gene=152189&matureName=hsa-miR-196a*&organism=9606
hsa-miR-196a-3p	MIMAT0004562	hsa-miR-196a*	11322	TMC6	-0.14	http://www.microrna.org/microrna/getMrna.do?gene=11322&matureName=hsa-miR-196a*&organism=9606
hsa-miR-196a-3p	MIMAT0004562	hsa-miR-196a*	9117	SEC22C	-0.15	http://www.microrna.org/microrna/getMrna.do?gene=9117&matureName=hsa-miR-196a*&organism=9606
hsa-miR-196a-3p	MIMAT0004562	hsa-miR-196a*	79684	C11orf61	-1.23	http://www.microrna.org/microrna/getMrna.do?gene=79684&matureName=hsa-miR-196a*&organism=9606
hsa-miR-196a-3p	MIMAT0004562	hsa-miR-196a*	10026	PIGK	-1.11	http://www.microrna.org/microrna/getMrna.do?gene=10026&matureName=hsa-miR-196a*&organism=9606
hsa-miR-196a-3p	MIMAT0004562	hsa-miR-196a*	124583	CANT1	-0.9	http://www.microrna.org/microrna/getMrna.do?gene=124583&matureName=hsa-miR-196a*&organism=9606
hsa-miR-196a-3p	MIMAT0004562	hsa-miR-196a*	150737	TTC30B	-1.16	http://www.microrna.org/microrna/getMrna.do?gene=150737&matureName=hsa-miR-196a*&organism=9606
hsa-miR-196a-3p	MIMAT0004562	hsa-miR-196a*	3800	KIF5C	-0.31	http://www.microrna.org/microrna/getMrna.do?gene=3800&matureName=hsa-miR-196a*&organism=9606
hsa-miR-196a-3p	MIMAT0004562	hsa-miR-196a*	1945	EFNA4	-1	http://www.microrna.org/microrna/getMrna.do?gene=1945&matureName=hsa-miR-196a*&organism=9606
hsa-miR-196a-3p	MIMAT0004562	hsa-miR-196a*	51110	LACTB2	-0.29	http://www.microrna.org/microrna/getMrna.do?gene=51110&matureName=hsa-miR-196a*&organism=9606
hsa-miR-196a-3p	MIMAT0004562	hsa-miR-196a*	6804	STX1A	-0.22	http://www.microrna.org/microrna/getMrna.do?gene=6804&matureName=hsa-miR-196a*&organism=9606
hsa-miR-196a-3p	MIMAT0004562	hsa-miR-196a*	8669	EIF3J	-0.24	http://www.microrna.org/microrna/getMrna.do?gene=8669&matureName=hsa-miR-196a*&organism=9606
hsa-miR-196a-3p	MIMAT0004562	hsa-miR-196a*	79665	DHX40	-0.22	http://www.microrna.org/microrna/getMrna.do?gene=79665&matureName=hsa-miR-196a*&organism=9606
hsa-miR-196a-3p	MIMAT0004562	hsa-miR-196a*	3773	KCNJ16	-1.17	http://www.microrna.org/microrna/getMrna.do?gene=3773&matureName=hsa-miR-196a*&organism=9606
hsa-miR-196a-3p	MIMAT0004562	hsa-miR-196a*	84449	ZNF333	-0.75	http://www.microrna.org/microrna/getMrna.do?gene=84449&matureName=hsa-miR-196a*&organism=9606
hsa-miR-196a-3p	MIMAT0004562	hsa-miR-196a*	5987	TRIM27	-0.24	http://www.microrna.org/microrna/getMrna.do?gene=5987&matureName=hsa-miR-196a*&organism=9606
hsa-miR-196a-3p	MIMAT0004562	hsa-miR-196a*	23554	TSPAN12	-1.31	http://www.microrna.org/microrna/getMrna.do?gene=23554&matureName=hsa-miR-196a*&organism=9606
hsa-miR-196a-3p	MIMAT0004562	hsa-miR-196a*	221060	C10orf111	-0.16	http://www.microrna.org/microrna/getMrna.do?gene=221060&matureName=hsa-miR-196a*&organism=9606
hsa-miR-196a-3p	MIMAT0004562	hsa-miR-196a*	7700	ZNF141	-0.29	http://www.microrna.org/microrna/getMrna.do?gene=7700&matureName=hsa-miR-196a*&organism=9606
hsa-miR-196a-3p	MIMAT0004562	hsa-miR-196a*	96764	TGS1	-0.11	http://www.microrna.org/microrna/getMrna.do?gene=96764&matureName=hsa-miR-196a*&organism=9606
hsa-miR-196a-3p	MIMAT0004562	hsa-miR-196a*	56977	STOX2	-0.21	http://www.microrna.org/microrna/getMrna.do?gene=56977&matureName=hsa-miR-196a*&organism=9606
hsa-miR-196a-3p	MIMAT0004562	hsa-miR-196a*	1903	S1PR3	-0.17	http://www.microrna.org/microrna/getMrna.do?gene=1903&matureName=hsa-miR-196a*&organism=9606
hsa-miR-196a-3p	MIMAT0004562	hsa-miR-196a*	29781	NCAPH2	-0.31	http://www.microrna.org/microrna/getMrna.do?gene=29781&matureName=hsa-miR-196a*&organism=9606
hsa-miR-196a-3p	MIMAT0004562	hsa-miR-196a*	9201	DCLK1	-0.52	http://www.microrna.org/microrna/getMrna.do?gene=9201&matureName=hsa-miR-196a*&organism=9606
hsa-miR-196a-3p	MIMAT0004562	hsa-miR-196a*	9874	TLK1	-1.15	http://www.microrna.org/microrna/getMrna.do?gene=9874&matureName=hsa-miR-196a*&organism=9606
hsa-miR-196a-3p	MIMAT0004562	hsa-miR-196a*	79829	NAA40	-0.1	http://www.microrna.org/microrna/getMrna.do?gene=79829&matureName=hsa-miR-196a*&organism=9606
hsa-miR-196a-3p	MIMAT0004562	hsa-miR-196a*	57187	THOC2	-0.16	http://www.microrna.org/microrna/getMrna.do?gene=57187&matureName=hsa-miR-196a*&organism=9606
hsa-miR-196a-3p	MIMAT0004562	hsa-miR-196a*	124222	PAQR4	-0.45	http://www.microrna.org/microrna/getMrna.do?gene=124222&matureName=hsa-miR-196a*&organism=9606
hsa-miR-196a-3p	MIMAT0004562	hsa-miR-196a*	6804	STX1A	-0.21	http://www.microrna.org/microrna/getMrna.do?gene=6804&matureName=hsa-miR-196a*&organism=9606
hsa-miR-196a-3p	MIMAT0004562	hsa-miR-196a*	440093	H3F3C	-0.1	http://www.microrna.org/microrna/getMrna.do?gene=440093&matureName=hsa-miR-196a*&organism=9606
hsa-miR-196a-3p	MIMAT0004562	hsa-miR-196a*	25902	MTHFD1L	-0.78	http://www.microrna.org/microrna/getMrna.do?gene=25902&matureName=hsa-miR-196a*&organism=9606
hsa-miR-196a-3p	MIMAT0004562	hsa-miR-196a*	25902	MTHFD1L	-0.36	http://www.microrna.org/microrna/getMrna.do?gene=25902&matureName=hsa-miR-196a*&organism=9606
hsa-miR-196a-3p	MIMAT0004562	hsa-miR-196a*	91298	C12orf29	-0.76	http://www.microrna.org/microrna/getMrna.do?gene=91298&matureName=hsa-miR-196a*&organism=9606
hsa-miR-196a-3p	MIMAT0004562	hsa-miR-196a*	4808	NHLH2	-0.15	http://www.microrna.org/microrna/getMrna.do?gene=4808&matureName=hsa-miR-196a*&organism=9606
hsa-miR-196a-3p	MIMAT0004562	hsa-miR-196a*	57452	GALNTL1	-0.16	http://www.microrna.org/microrna/getMrna.do?gene=57452&matureName=hsa-miR-196a*&organism=9606
hsa-miR-196a-3p	MIMAT0004562	hsa-miR-196a*	166647	GPR125	-0.12	http://www.microrna.org/microrna/getMrna.do?gene=166647&matureName=hsa-miR-196a*&organism=9606
hsa-miR-196a-3p	MIMAT0004562	hsa-miR-196a*	29781	NCAPH2	-0.31	http://www.microrna.org/microrna/getMrna.do?gene=29781&matureName=hsa-miR-196a*&organism=9606
hsa-miR-196a-3p	MIMAT0004562	hsa-miR-196a*	729013	LOC729013	-0.51	http://www.microrna.org/microrna/getMrna.do?gene=729013&matureName=hsa-miR-196a*&organism=9606
hsa-miR-196a-3p	MIMAT0004562	hsa-miR-196a*	654434	C17orf86	-0.33	http://www.microrna.org/microrna/getMrna.do?gene=654434&matureName=hsa-miR-196a*&organism=9606
hsa-miR-196a-3p	MIMAT0004562	hsa-miR-196a*	59269	HIVEP3	-0.21	http://www.microrna.org/microrna/getMrna.do?gene=59269&matureName=hsa-miR-196a*&organism=9606
hsa-miR-196a-3p	MIMAT0004562	hsa-miR-196a*	389043	LOC389043	-0.21	http://www.microrna.org/microrna/getMrna.do?gene=389043&matureName=hsa-miR-196a*&organism=9606
hsa-miR-196a-3p	MIMAT0004562	hsa-miR-196a*	57595	PDZD4	-1.11	http://www.microrna.org/microrna/getMrna.do?gene=57595&matureName=hsa-miR-196a*&organism=9606
hsa-miR-196a-3p	MIMAT0004562	hsa-miR-196a*	1654	DDX3X	-0.23	http://www.microrna.org/microrna/getMrna.do?gene=1654&matureName=hsa-miR-196a*&organism=9606
hsa-miR-196a-3p	MIMAT0004562	hsa-miR-196a*	253782	LASS6	-0.11	http://www.microrna.org/microrna/getMrna.do?gene=253782&matureName=hsa-miR-196a*&organism=9606
hsa-miR-196a-3p	MIMAT0004562	hsa-miR-196a*	90135	BTBD6	-0.22	http://www.microrna.org/microrna/getMrna.do?gene=90135&matureName=hsa-miR-196a*&organism=9606
hsa-miR-196a-3p	MIMAT0004562	hsa-miR-196a*	23107	MRPS27	-0.39	http://www.microrna.org/microrna/getMrna.do?gene=23107&matureName=hsa-miR-196a*&organism=9606
hsa-miR-196a-3p	MIMAT0004562	hsa-miR-196a*	347689	SOX2OT	-1.02	http://www.microrna.org/microrna/getMrna.do?gene=347689&matureName=hsa-miR-196a*&organism=9606
hsa-miR-196a-3p	MIMAT0004562	hsa-miR-196a*	64506	CPEB1	-0.11	http://www.microrna.org/microrna/getMrna.do?gene=64506&matureName=hsa-miR-196a*&organism=9606
hsa-miR-196a-3p	MIMAT0004562	hsa-miR-196a*	10107	TRIM10	-0.15	http://www.microrna.org/microrna/getMrna.do?gene=10107&matureName=hsa-miR-196a*&organism=9606
hsa-miR-196a-3p	MIMAT0004562	hsa-miR-196a*	100132565	GOLGA8F	-0.3	http://www.microrna.org/microrna/getMrna.do?gene=100132565&matureName=hsa-miR-196a*&organism=9606
hsa-miR-196a-3p	MIMAT0004562	hsa-miR-196a*	79969	C6orf134	-0.47	http://www.microrna.org/microrna/getMrna.do?gene=79969&matureName=hsa-miR-196a*&organism=9606
hsa-miR-196a-3p	MIMAT0004562	hsa-miR-196a*	22870	SAPS1	-0.2	http://www.microrna.org/microrna/getMrna.do?gene=22870&matureName=hsa-miR-196a*&organism=9606
hsa-miR-196a-3p	MIMAT0004562	hsa-miR-196a*	128218	TMEM125	-0.38	http://www.microrna.org/microrna/getMrna.do?gene=128218&matureName=hsa-miR-196a*&organism=9606
hsa-miR-196a-3p	MIMAT0004562	hsa-miR-196a*	22873	DZIP1	-0.28	http://www.microrna.org/microrna/getMrna.do?gene=22873&matureName=hsa-miR-196a*&organism=9606
hsa-miR-196a-3p	MIMAT0004562	hsa-miR-196a*	10107	TRIM10	-0.16	http://www.microrna.org/microrna/getMrna.do?gene=10107&matureName=hsa-miR-196a*&organism=9606
hsa-miR-196a-3p	MIMAT0004562	hsa-miR-196a*	9625	AATK	-1.22	http://www.microrna.org/microrna/getMrna.do?gene=9625&matureName=hsa-miR-196a*&organism=9606
hsa-miR-196a-3p	MIMAT0004562	hsa-miR-196a*	11093	ADAMTS13	-0.66	http://www.microrna.org/microrna/getMrna.do?gene=11093&matureName=hsa-miR-196a*&organism=9606
hsa-miR-196a-3p	MIMAT0004562	hsa-miR-196a*	677829	SNORA49	-0.83	http://www.microrna.org/microrna/getMrna.do?gene=677829&matureName=hsa-miR-196a*&organism=9606
hsa-miR-196a-3p	MIMAT0004562	hsa-miR-196a*	26353	HSPB8	-0.14	http://www.microrna.org/microrna/getMrna.do?gene=26353&matureName=hsa-miR-196a*&organism=9606
hsa-miR-196a-3p	MIMAT0004562	hsa-miR-196a*	1861	TOR1A	-0.59	http://www.microrna.org/microrna/getMrna.do?gene=1861&matureName=hsa-miR-196a*&organism=9606
hsa-miR-196a-3p	MIMAT0004562	hsa-miR-196a*	1910	EDNRB	-0.15	http://www.microrna.org/microrna/getMrna.do?gene=1910&matureName=hsa-miR-196a*&organism=9606
hsa-miR-196a-3p	MIMAT0004562	hsa-miR-196a*	7268	TTC4	-0.18	http://www.microrna.org/microrna/getMrna.do?gene=7268&matureName=hsa-miR-196a*&organism=9606
hsa-miR-196a-3p	MIMAT0004562	hsa-miR-196a*	22887	FOXJ3	-0.12	http://www.microrna.org/microrna/getMrna.do?gene=22887&matureName=hsa-miR-196a*&organism=9606
hsa-miR-196a-3p	MIMAT0004562	hsa-miR-196a*	285315	C3orf33	-0.21	http://www.microrna.org/microrna/getMrna.do?gene=285315&matureName=hsa-miR-196a*&organism=9606
hsa-miR-196a-3p	MIMAT0004562	hsa-miR-196a*	158866	ZDHHC15	-0.13	http://www.microrna.org/microrna/getMrna.do?gene=158866&matureName=hsa-miR-196a*&organism=9606
hsa-miR-196a-3p	MIMAT0004562	hsa-miR-196a*	79745	CLIP4	-0.12	http://www.microrna.org/microrna/getMrna.do?gene=79745&matureName=hsa-miR-196a*&organism=9606
hsa-miR-196a-3p	MIMAT0004562	hsa-miR-196a*	5156	PDGFRA	-0.12	http://www.microrna.org/microrna/getMrna.do?gene=5156&matureName=hsa-miR-196a*&organism=9606
hsa-miR-196a-3p	MIMAT0004562	hsa-miR-196a*	90407	TMEM41A	-0.37	http://www.microrna.org/microrna/getMrna.do?gene=90407&matureName=hsa-miR-196a*&organism=9606
hsa-miR-196a-3p	MIMAT0004562	hsa-miR-196a*	90407	TMEM41A	-0.31	http://www.microrna.org/microrna/getMrna.do?gene=90407&matureName=hsa-miR-196a*&organism=9606
hsa-miR-196a-3p	MIMAT0004562	hsa-miR-196a*	7756	ZNF207	-0.18	http://www.microrna.org/microrna/getMrna.do?gene=7756&matureName=hsa-miR-196a*&organism=9606
hsa-miR-196a-3p	MIMAT0004562	hsa-miR-196a*	204962	SLC44A5	-0.12	http://www.microrna.org/microrna/getMrna.do?gene=204962&matureName=hsa-miR-196a*&organism=9606
hsa-miR-196a-3p	MIMAT0004562	hsa-miR-196a*	54972	TMEM132A	-0.22	http://www.microrna.org/microrna/getMrna.do?gene=54972&matureName=hsa-miR-196a*&organism=9606
hsa-miR-196a-3p	MIMAT0004562	hsa-miR-196a*	84765	ZNF577	-0.11	http://www.microrna.org/microrna/getMrna.do?gene=84765&matureName=hsa-miR-196a*&organism=9606
hsa-miR-196a-3p	MIMAT0004562	hsa-miR-196a*	162427	FAM134C	-0.17	http://www.microrna.org/microrna/getMrna.do?gene=162427&matureName=hsa-miR-196a*&organism=9606
hsa-miR-196a-3p	MIMAT0004562	hsa-miR-196a*	51361	HOOK1	-0.17	http://www.microrna.org/microrna/getMrna.do?gene=51361&matureName=hsa-miR-196a*&organism=9606
hsa-miR-196a-3p	MIMAT0004562	hsa-miR-196a*	340529	PABPC1L2A	-0.9	http://www.microrna.org/microrna/getMrna.do?gene=340529&matureName=hsa-miR-196a*&organism=9606
hsa-miR-196a-3p	MIMAT0004562	hsa-miR-196a*	3654	IRAK1	-0.15	http://www.microrna.org/microrna/getMrna.do?gene=3654&matureName=hsa-miR-196a*&organism=9606
hsa-miR-196a-3p	MIMAT0004562	hsa-miR-196a*	121006	FAM186A	-0.13	http://www.microrna.org/microrna/getMrna.do?gene=121006&matureName=hsa-miR-196a*&organism=9606
hsa-miR-196a-3p	MIMAT0004562	hsa-miR-196a*	8601	RGS20	-0.23	http://www.microrna.org/microrna/getMrna.do?gene=8601&matureName=hsa-miR-196a*&organism=9606
hsa-miR-196a-3p	MIMAT0004562	hsa-miR-196a*	6814	STXBP3	-0.16	http://www.microrna.org/microrna/getMrna.do?gene=6814&matureName=hsa-miR-196a*&organism=9606
hsa-miR-196a-3p	MIMAT0004562	hsa-miR-196a*	51148	CERCAM	-0.37	http://www.microrna.org/microrna/getMrna.do?gene=51148&matureName=hsa-miR-196a*&organism=9606
hsa-miR-196a-3p	MIMAT0004562	hsa-miR-196a*	6519	SLC3A1	-0.37	http://www.microrna.org/microrna/getMrna.do?gene=6519&matureName=hsa-miR-196a*&organism=9606
hsa-miR-196a-3p	MIMAT0004562	hsa-miR-196a*	92359	CRB3	-0.14	http://www.microrna.org/microrna/getMrna.do?gene=92359&matureName=hsa-miR-196a*&organism=9606
hsa-miR-196a-3p	MIMAT0004562	hsa-miR-196a*	4664	NAB1	-0.63	http://www.microrna.org/microrna/getMrna.do?gene=4664&matureName=hsa-miR-196a*&organism=9606
hsa-miR-196a-3p	MIMAT0004562	hsa-miR-196a*	347689	SOX2OT	-0.99	http://www.microrna.org/microrna/getMrna.do?gene=347689&matureName=hsa-miR-196a*&organism=9606
hsa-miR-196a-3p	MIMAT0004562	hsa-miR-196a*	28973	MRPS18B	-0.82	http://www.microrna.org/microrna/getMrna.do?gene=28973&matureName=hsa-miR-196a*&organism=9606
hsa-miR-196a-3p	MIMAT0004562	hsa-miR-196a*	51105	PHF20L1	-0.17	http://www.microrna.org/microrna/getMrna.do?gene=51105&matureName=hsa-miR-196a*&organism=9606
hsa-miR-196a-3p	MIMAT0004562	hsa-miR-196a*	51105	PHF20L1	-0.82	http://www.microrna.org/microrna/getMrna.do?gene=51105&matureName=hsa-miR-196a*&organism=9606
hsa-miR-196a-3p	MIMAT0004562	hsa-miR-196a*	5788	PTPRC	-0.13	http://www.microrna.org/microrna/getMrna.do?gene=5788&matureName=hsa-miR-196a*&organism=9606
hsa-miR-196a-3p	MIMAT0004562	hsa-miR-196a*	339926	LOC339926	-0.6	http://www.microrna.org/microrna/getMrna.do?gene=339926&matureName=hsa-miR-196a*&organism=9606
hsa-miR-196a-3p	MIMAT0004562	hsa-miR-196a*	125144	NCRNA00188	-0.3	http://www.microrna.org/microrna/getMrna.do?gene=125144&matureName=hsa-miR-196a*&organism=9606
hsa-miR-196a-3p	MIMAT0004562	hsa-miR-196a*	140890	SFRS12	-0.84	http://www.microrna.org/microrna/getMrna.do?gene=140890&matureName=hsa-miR-196a*&organism=9606
hsa-miR-196a-3p	MIMAT0004562	hsa-miR-196a*	133619	PRRC1	-0.19	http://www.microrna.org/microrna/getMrna.do?gene=133619&matureName=hsa-miR-196a*&organism=9606
hsa-miR-196a-3p	MIMAT0004562	hsa-miR-196a*	23613	ZMYND8	-0.51	http://www.microrna.org/microrna/getMrna.do?gene=23613&matureName=hsa-miR-196a*&organism=9606
hsa-miR-196a-3p	MIMAT0004562	hsa-miR-196a*	140767	NRSN1	-0.95	http://www.microrna.org/microrna/getMrna.do?gene=140767&matureName=hsa-miR-196a*&organism=9606
hsa-miR-196a-3p	MIMAT0004562	hsa-miR-196a*	9019	MPZL1	-0.34	http://www.microrna.org/microrna/getMrna.do?gene=9019&matureName=hsa-miR-196a*&organism=9606
hsa-miR-196a-3p	MIMAT0004562	hsa-miR-196a*	29085	PHPT1	-0.39	http://www.microrna.org/microrna/getMrna.do?gene=29085&matureName=hsa-miR-196a*&organism=9606
hsa-miR-196a-3p	MIMAT0004562	hsa-miR-196a*	255252	LRRC57	-0.86	http://www.microrna.org/microrna/getMrna.do?gene=255252&matureName=hsa-miR-196a*&organism=9606
hsa-miR-196a-3p	MIMAT0004562	hsa-miR-196a*	8609	KLF7	-0.64	http://www.microrna.org/microrna/getMrna.do?gene=8609&matureName=hsa-miR-196a*&organism=9606
hsa-miR-196a-3p	MIMAT0004562	hsa-miR-196a*	221241	C18orf20	-0.13	http://www.microrna.org/microrna/getMrna.do?gene=221241&matureName=hsa-miR-196a*&organism=9606
hsa-miR-196a-3p	MIMAT0004562	hsa-miR-196a*	653129	PTPN20A	-0.46	http://www.microrna.org/microrna/getMrna.do?gene=653129&matureName=hsa-miR-196a*&organism=9606
hsa-miR-196a-3p	MIMAT0004562	hsa-miR-196a*	138241	C9orf85	-0.16	http://www.microrna.org/microrna/getMrna.do?gene=138241&matureName=hsa-miR-196a*&organism=9606
hsa-miR-196a-3p	MIMAT0004562	hsa-miR-196a*	653129	PTPN20A	-0.54	http://www.microrna.org/microrna/getMrna.do?gene=653129&matureName=hsa-miR-196a*&organism=9606
hsa-miR-196a-3p	MIMAT0004562	hsa-miR-196a*	128239	IQGAP3	-0.43	http://www.microrna.org/microrna/getMrna.do?gene=128239&matureName=hsa-miR-196a*&organism=9606
hsa-miR-196a-3p	MIMAT0004562	hsa-miR-196a*	55118	CRTAC1	-1.02	http://www.microrna.org/microrna/getMrna.do?gene=55118&matureName=hsa-miR-196a*&organism=9606
hsa-miR-196a-3p	MIMAT0004562	hsa-miR-196a*	125476	INO80C	-1.11	http://www.microrna.org/microrna/getMrna.do?gene=125476&matureName=hsa-miR-196a*&organism=9606
hsa-miR-196a-3p	MIMAT0004562	hsa-miR-196a*	9658	ZNF516	-0.85	http://www.microrna.org/microrna/getMrna.do?gene=9658&matureName=hsa-miR-196a*&organism=9606
hsa-miR-196a-3p	MIMAT0004562	hsa-miR-196a*	80817	KIAA1712	-0.13	http://www.microrna.org/microrna/getMrna.do?gene=80817&matureName=hsa-miR-196a*&organism=9606
hsa-miR-196a-3p	MIMAT0004562	hsa-miR-196a*	5429	POLH	-0.26	http://www.microrna.org/microrna/getMrna.do?gene=5429&matureName=hsa-miR-196a*&organism=9606
hsa-miR-196a-3p	MIMAT0004562	hsa-miR-196a*	160518	DENND5B	-0.36	http://www.microrna.org/microrna/getMrna.do?gene=160518&matureName=hsa-miR-196a*&organism=9606
hsa-miR-196a-3p	MIMAT0004562	hsa-miR-196a*	27333	GOLIM4	-1.05	http://www.microrna.org/microrna/getMrna.do?gene=27333&matureName=hsa-miR-196a*&organism=9606
hsa-miR-196a-3p	MIMAT0004562	hsa-miR-196a*	63875	MRPL17	-0.95	http://www.microrna.org/microrna/getMrna.do?gene=63875&matureName=hsa-miR-196a*&organism=9606
hsa-miR-196a-3p	MIMAT0004562	hsa-miR-196a*	23034	SAMD4A	-0.84	http://www.microrna.org/microrna/getMrna.do?gene=23034&matureName=hsa-miR-196a*&organism=9606
hsa-miR-196a-3p	MIMAT0004562	hsa-miR-196a*	51447	IP6K2	-1.03	http://www.microrna.org/microrna/getMrna.do?gene=51447&matureName=hsa-miR-196a*&organism=9606
hsa-miR-196a-3p	MIMAT0004562	hsa-miR-196a*	2555	GABRA2	-0.15	http://www.microrna.org/microrna/getMrna.do?gene=2555&matureName=hsa-miR-196a*&organism=9606
hsa-miR-196a-3p	MIMAT0004562	hsa-miR-196a*	54726	OTUD4	-0.15	http://www.microrna.org/microrna/getMrna.do?gene=54726&matureName=hsa-miR-196a*&organism=9606
hsa-miR-196a-3p	MIMAT0004562	hsa-miR-196a*	79143	MBOAT7	-0.41	http://www.microrna.org/microrna/getMrna.do?gene=79143&matureName=hsa-miR-196a*&organism=9606
hsa-miR-196a-3p	MIMAT0004562	hsa-miR-196a*	9378	NRXN1	-0.78	http://www.microrna.org/microrna/getMrna.do?gene=9378&matureName=hsa-miR-196a*&organism=9606
hsa-miR-196a-3p	MIMAT0004562	hsa-miR-196a*	728	C5AR1	-0.42	http://www.microrna.org/microrna/getMrna.do?gene=728&matureName=hsa-miR-196a*&organism=9606
hsa-miR-196a-3p	MIMAT0004562	hsa-miR-196a*	8556	CDC14A	-0.13	http://www.microrna.org/microrna/getMrna.do?gene=8556&matureName=hsa-miR-196a*&organism=9606
hsa-miR-196a-3p	MIMAT0004562	hsa-miR-196a*	3394	IRF8	-0.72	http://www.microrna.org/microrna/getMrna.do?gene=3394&matureName=hsa-miR-196a*&organism=9606
hsa-miR-196a-3p	MIMAT0004562	hsa-miR-196a*	3613	IMPA2	-0.34	http://www.microrna.org/microrna/getMrna.do?gene=3613&matureName=hsa-miR-196a*&organism=9606
hsa-miR-196a-3p	MIMAT0004562	hsa-miR-196a*	57515	SERINC1	-0.19	http://www.microrna.org/microrna/getMrna.do?gene=57515&matureName=hsa-miR-196a*&organism=9606
hsa-miR-196a-3p	MIMAT0004562	hsa-miR-196a*	79939	SLC35E1	-0.18	http://www.microrna.org/microrna/getMrna.do?gene=79939&matureName=hsa-miR-196a*&organism=9606
hsa-miR-196a-3p	MIMAT0004562	hsa-miR-196a*	79939	SLC35E1	-0.17	http://www.microrna.org/microrna/getMrna.do?gene=79939&matureName=hsa-miR-196a*&organism=9606
hsa-miR-196a-3p	MIMAT0004562	hsa-miR-196a*	195827	C9orf21	-1.23	http://www.microrna.org/microrna/getMrna.do?gene=195827&matureName=hsa-miR-196a*&organism=9606
hsa-miR-196a-3p	MIMAT0004562	hsa-miR-196a*	83591	THAP2	-0.22	http://www.microrna.org/microrna/getMrna.do?gene=83591&matureName=hsa-miR-196a*&organism=9606
hsa-miR-196a-3p	MIMAT0004562	hsa-miR-196a*	9501	RPH3AL	-0.15	http://www.microrna.org/microrna/getMrna.do?gene=9501&matureName=hsa-miR-196a*&organism=9606
hsa-miR-196a-3p	MIMAT0004562	hsa-miR-196a*	1310	COL19A1	-0.26	http://www.microrna.org/microrna/getMrna.do?gene=1310&matureName=hsa-miR-196a*&organism=9606
hsa-miR-196a-3p	MIMAT0004562	hsa-miR-196a*	3111	HLA-DOA	-0.51	http://www.microrna.org/microrna/getMrna.do?gene=3111&matureName=hsa-miR-196a*&organism=9606
hsa-miR-196a-3p	MIMAT0004562	hsa-miR-196a*	11060	WWP2	-0.16	http://www.microrna.org/microrna/getMrna.do?gene=11060&matureName=hsa-miR-196a*&organism=9606
hsa-miR-196a-3p	MIMAT0004562	hsa-miR-196a*	55704	CCDC88A	-1.14	http://www.microrna.org/microrna/getMrna.do?gene=55704&matureName=hsa-miR-196a*&organism=9606
hsa-miR-196a-3p	MIMAT0004562	hsa-miR-196a*	25837	RAB26	-0.2	http://www.microrna.org/microrna/getMrna.do?gene=25837&matureName=hsa-miR-196a*&organism=9606
hsa-miR-196a-3p	MIMAT0004562	hsa-miR-196a*	55092	TMEM51	-0.21	http://www.microrna.org/microrna/getMrna.do?gene=55092&matureName=hsa-miR-196a*&organism=9606
hsa-miR-196a-3p	MIMAT0004562	hsa-miR-196a*	729307	LOC729307	-1.19	http://www.microrna.org/microrna/getMrna.do?gene=729307&matureName=hsa-miR-196a*&organism=9606
hsa-miR-196a-3p	MIMAT0004562	hsa-miR-196a*	283514	SIAH3	-0.86	http://www.microrna.org/microrna/getMrna.do?gene=283514&matureName=hsa-miR-196a*&organism=9606
hsa-miR-196a-3p	MIMAT0004562	hsa-miR-196a*	474149	TTTY4B	-1.28	http://www.microrna.org/microrna/getMrna.do?gene=474149&matureName=hsa-miR-196a*&organism=9606
hsa-miR-196a-3p	MIMAT0004562	hsa-miR-196a*	728833	FAM72D	-0.13	http://www.microrna.org/microrna/getMrna.do?gene=728833&matureName=hsa-miR-196a*&organism=9606
hsa-miR-196a-3p	MIMAT0004562	hsa-miR-196a*	7462	LAT2	-1	http://www.microrna.org/microrna/getMrna.do?gene=7462&matureName=hsa-miR-196a*&organism=9606
hsa-miR-196a-3p	MIMAT0004562	hsa-miR-196a*	23760	PITPNB	-0.49	http://www.microrna.org/microrna/getMrna.do?gene=23760&matureName=hsa-miR-196a*&organism=9606
hsa-miR-196a-3p	MIMAT0004562	hsa-miR-196a*	858	CAV2	-0.1	http://www.microrna.org/microrna/getMrna.do?gene=858&matureName=hsa-miR-196a*&organism=9606
hsa-miR-196a-3p	MIMAT0004562	hsa-miR-196a*	26027	ACOT11	-0.33	http://www.microrna.org/microrna/getMrna.do?gene=26027&matureName=hsa-miR-196a*&organism=9606
hsa-miR-196a-3p	MIMAT0004562	hsa-miR-196a*	26027	ACOT11	-0.63	http://www.microrna.org/microrna/getMrna.do?gene=26027&matureName=hsa-miR-196a*&organism=9606
hsa-miR-196a-3p	MIMAT0004562	hsa-miR-196a*	83714	NRIP2	-0.18	http://www.microrna.org/microrna/getMrna.do?gene=83714&matureName=hsa-miR-196a*&organism=9606
hsa-miR-196a-3p	MIMAT0004562	hsa-miR-196a*	143458	LDLRAD3	-0.86	http://www.microrna.org/microrna/getMrna.do?gene=143458&matureName=hsa-miR-196a*&organism=9606
hsa-miR-196a-3p	MIMAT0004562	hsa-miR-196a*	8553	BHLHE40	-0.19	http://www.microrna.org/microrna/getMrna.do?gene=8553&matureName=hsa-miR-196a*&organism=9606
hsa-miR-196a-3p	MIMAT0004562	hsa-miR-196a*	91782	CHMP7	-0.15	http://www.microrna.org/microrna/getMrna.do?gene=91782&matureName=hsa-miR-196a*&organism=9606
hsa-miR-196a-3p	MIMAT0004562	hsa-miR-196a*	285954	LOC285954	-0.8	http://www.microrna.org/microrna/getMrna.do?gene=285954&matureName=hsa-miR-196a*&organism=9606
hsa-miR-196a-3p	MIMAT0004562	hsa-miR-196a*	116254	C6orf72	-0.17	http://www.microrna.org/microrna/getMrna.do?gene=116254&matureName=hsa-miR-196a*&organism=9606
hsa-miR-196a-3p	MIMAT0004562	hsa-miR-196a*	2643	GCH1	-0.68	http://www.microrna.org/microrna/getMrna.do?gene=2643&matureName=hsa-miR-196a*&organism=9606
hsa-miR-196a-3p	MIMAT0004562	hsa-miR-196a*	80777	CYB5B	-0.21	http://www.microrna.org/microrna/getMrna.do?gene=80777&matureName=hsa-miR-196a*&organism=9606
hsa-miR-196a-3p	MIMAT0004562	hsa-miR-196a*	340595	ZCCHC16	-0.69	http://www.microrna.org/microrna/getMrna.do?gene=340595&matureName=hsa-miR-196a*&organism=9606
hsa-miR-196a-3p	MIMAT0004562	hsa-miR-196a*	91775	FAM55C	-0.12	http://www.microrna.org/microrna/getMrna.do?gene=91775&matureName=hsa-miR-196a*&organism=9606
hsa-miR-196a-3p	MIMAT0004562	hsa-miR-196a*	162466	PHOSPHO1	-0.17	http://www.microrna.org/microrna/getMrna.do?gene=162466&matureName=hsa-miR-196a*&organism=9606
hsa-miR-196a-3p	MIMAT0004562	hsa-miR-196a*	10777	ARPP21	-1	http://www.microrna.org/microrna/getMrna.do?gene=10777&matureName=hsa-miR-196a*&organism=9606
hsa-miR-196a-3p	MIMAT0004562	hsa-miR-196a*	5029	P2RY2	-0.3	http://www.microrna.org/microrna/getMrna.do?gene=5029&matureName=hsa-miR-196a*&organism=9606
hsa-miR-196a-3p	MIMAT0004562	hsa-miR-196a*	59340	HRH4	-0.85	http://www.microrna.org/microrna/getMrna.do?gene=59340&matureName=hsa-miR-196a*&organism=9606
hsa-miR-196a-3p	MIMAT0004562	hsa-miR-196a*	9334	B4GALT5	-0.36	http://www.microrna.org/microrna/getMrna.do?gene=9334&matureName=hsa-miR-196a*&organism=9606
hsa-miR-196a-3p	MIMAT0004562	hsa-miR-196a*	54536	EXOC6	-0.95	http://www.microrna.org/microrna/getMrna.do?gene=54536&matureName=hsa-miR-196a*&organism=9606
hsa-miR-196a-3p	MIMAT0004562	hsa-miR-196a*	728485	LOC728485	-0.34	http://www.microrna.org/microrna/getMrna.do?gene=728485&matureName=hsa-miR-196a*&organism=9606
hsa-miR-196a-3p	MIMAT0004562	hsa-miR-196a*	219654	ZCCHC24	-0.39	http://www.microrna.org/microrna/getMrna.do?gene=219654&matureName=hsa-miR-196a*&organism=9606
hsa-miR-196a-3p	MIMAT0004562	hsa-miR-196a*	222255	ATXN7L1	-0.64	http://www.microrna.org/microrna/getMrna.do?gene=222255&matureName=hsa-miR-196a*&organism=9606
hsa-miR-196a-3p	MIMAT0004562	hsa-miR-196a*	114825	PWWP2A	-0.2	http://www.microrna.org/microrna/getMrna.do?gene=114825&matureName=hsa-miR-196a*&organism=9606
hsa-miR-196a-3p	MIMAT0004562	hsa-miR-196a*	4242	MFNG	-0.39	http://www.microrna.org/microrna/getMrna.do?gene=4242&matureName=hsa-miR-196a*&organism=9606
hsa-miR-196a-3p	MIMAT0004562	hsa-miR-196a*	7157	TP53	-0.14	http://www.microrna.org/microrna/getMrna.do?gene=7157&matureName=hsa-miR-196a*&organism=9606
hsa-miR-196a-3p	MIMAT0004562	hsa-miR-196a*	25963	TMEM87A	-0.6	http://www.microrna.org/microrna/getMrna.do?gene=25963&matureName=hsa-miR-196a*&organism=9606
hsa-miR-196a-3p	MIMAT0004562	hsa-miR-196a*	56910	STARD7	-0.66	http://www.microrna.org/microrna/getMrna.do?gene=56910&matureName=hsa-miR-196a*&organism=9606
hsa-miR-196a-3p	MIMAT0004562	hsa-miR-196a*	5793	PTPRG	-0.29	http://www.microrna.org/microrna/getMrna.do?gene=5793&matureName=hsa-miR-196a*&organism=9606
hsa-miR-196a-3p	MIMAT0004562	hsa-miR-196a*	283897	C16orf54	-0.2	http://www.microrna.org/microrna/getMrna.do?gene=283897&matureName=hsa-miR-196a*&organism=9606
hsa-miR-196a-3p	MIMAT0004562	hsa-miR-196a*	1780	DYNC1I1	-1.13	http://www.microrna.org/microrna/getMrna.do?gene=1780&matureName=hsa-miR-196a*&organism=9606
hsa-miR-196a-3p	MIMAT0004562	hsa-miR-196a*	1080	CFTR	-0.22	http://www.microrna.org/microrna/getMrna.do?gene=1080&matureName=hsa-miR-196a*&organism=9606
hsa-miR-196a-3p	MIMAT0004562	hsa-miR-196a*	100128338	LOC100128338	-0.14	http://www.microrna.org/microrna/getMrna.do?gene=100128338&matureName=hsa-miR-196a*&organism=9606
hsa-miR-196a-3p	MIMAT0004562	hsa-miR-196a*	100128338	LOC100128338	-0.15	http://www.microrna.org/microrna/getMrna.do?gene=100128338&matureName=hsa-miR-196a*&organism=9606
hsa-miR-196a-3p	MIMAT0004562	hsa-miR-196a*	25852	ARMC8	-0.23	http://www.microrna.org/microrna/getMrna.do?gene=25852&matureName=hsa-miR-196a*&organism=9606
hsa-miR-196a-3p	MIMAT0004562	hsa-miR-196a*	84869	CBR4	-0.27	http://www.microrna.org/microrna/getMrna.do?gene=84869&matureName=hsa-miR-196a*&organism=9606
hsa-miR-196a-3p	MIMAT0004562	hsa-miR-196a*	84869	CBR4	-0.23	http://www.microrna.org/microrna/getMrna.do?gene=84869&matureName=hsa-miR-196a*&organism=9606
hsa-miR-196a-3p	MIMAT0004562	hsa-miR-196a*	30061	SLC40A1	-0.11	http://www.microrna.org/microrna/getMrna.do?gene=30061&matureName=hsa-miR-196a*&organism=9606
hsa-miR-196a-3p	MIMAT0004562	hsa-miR-196a*	133	ADM	-0.23	http://www.microrna.org/microrna/getMrna.do?gene=133&matureName=hsa-miR-196a*&organism=9606
hsa-miR-196a-3p	MIMAT0004562	hsa-miR-196a*	140739	UBE2F	-0.54	http://www.microrna.org/microrna/getMrna.do?gene=140739&matureName=hsa-miR-196a*&organism=9606
hsa-miR-196a-3p	MIMAT0004562	hsa-miR-196a*	653129	PTPN20A	-0.46	http://www.microrna.org/microrna/getMrna.do?gene=653129&matureName=hsa-miR-196a*&organism=9606
hsa-miR-196a-3p	MIMAT0004562	hsa-miR-196a*	6317	SERPINB3	-0.42	http://www.microrna.org/microrna/getMrna.do?gene=6317&matureName=hsa-miR-196a*&organism=9606
hsa-miR-196a-3p	MIMAT0004562	hsa-miR-196a*	1238	CCBP2	-0.15	http://www.microrna.org/microrna/getMrna.do?gene=1238&matureName=hsa-miR-196a*&organism=9606
hsa-miR-196a-3p	MIMAT0004562	hsa-miR-196a*	63929	XPNPEP3	-0.13	http://www.microrna.org/microrna/getMrna.do?gene=63929&matureName=hsa-miR-196a*&organism=9606
hsa-miR-196a-3p	MIMAT0004562	hsa-miR-196a*	10765	KDM5B	-1.05	http://www.microrna.org/microrna/getMrna.do?gene=10765&matureName=hsa-miR-196a*&organism=9606
hsa-miR-196a-3p	MIMAT0004562	hsa-miR-196a*	10777	ARPP21	-0.84	http://www.microrna.org/microrna/getMrna.do?gene=10777&matureName=hsa-miR-196a*&organism=9606
hsa-miR-196a-3p	MIMAT0004562	hsa-miR-196a*	54206	ERRFI1	-0.33	http://www.microrna.org/microrna/getMrna.do?gene=54206&matureName=hsa-miR-196a*&organism=9606
hsa-miR-196a-3p	MIMAT0004562	hsa-miR-196a*	634	CEACAM1	-0.25	http://www.microrna.org/microrna/getMrna.do?gene=634&matureName=hsa-miR-196a*&organism=9606
hsa-miR-196a-3p	MIMAT0004562	hsa-miR-196a*	57559	STAMBPL1	-0.21	http://www.microrna.org/microrna/getMrna.do?gene=57559&matureName=hsa-miR-196a*&organism=9606
hsa-miR-196a-3p	MIMAT0004562	hsa-miR-196a*	2960	GTF2E1	-0.4	http://www.microrna.org/microrna/getMrna.do?gene=2960&matureName=hsa-miR-196a*&organism=9606
hsa-miR-196a-3p	MIMAT0004562	hsa-miR-196a*	220047	CCDC83	-0.11	http://www.microrna.org/microrna/getMrna.do?gene=220047&matureName=hsa-miR-196a*&organism=9606
hsa-miR-196a-3p	MIMAT0004562	hsa-miR-196a*	51195	RAPGEFL1	-0.31	http://www.microrna.org/microrna/getMrna.do?gene=51195&matureName=hsa-miR-196a*&organism=9606
hsa-miR-196a-3p	MIMAT0004562	hsa-miR-196a*	6311	ATXN2	-0.12	http://www.microrna.org/microrna/getMrna.do?gene=6311&matureName=hsa-miR-196a*&organism=9606
hsa-miR-196a-3p	MIMAT0004562	hsa-miR-196a*	6311	ATXN2	-0.29	http://www.microrna.org/microrna/getMrna.do?gene=6311&matureName=hsa-miR-196a*&organism=9606
hsa-miR-196a-3p	MIMAT0004562	hsa-miR-196a*	8661	EIF3A	-1.18	http://www.microrna.org/microrna/getMrna.do?gene=8661&matureName=hsa-miR-196a*&organism=9606
hsa-miR-196a-3p	MIMAT0004562	hsa-miR-196a*	8661	EIF3A	-0.18	http://www.microrna.org/microrna/getMrna.do?gene=8661&matureName=hsa-miR-196a*&organism=9606
hsa-miR-196a-3p	MIMAT0004562	hsa-miR-196a*	158234	RG9MTD3	-0.25	http://www.microrna.org/microrna/getMrna.do?gene=158234&matureName=hsa-miR-196a*&organism=9606
hsa-miR-196a-3p	MIMAT0004562	hsa-miR-196a*	2968	GTF2H4	-0.21	http://www.microrna.org/microrna/getMrna.do?gene=2968&matureName=hsa-miR-196a*&organism=9606
hsa-miR-196a-3p	MIMAT0004562	hsa-miR-196a*	54205	CYCS	-0.14	http://www.microrna.org/microrna/getMrna.do?gene=54205&matureName=hsa-miR-196a*&organism=9606
hsa-miR-196a-3p	MIMAT0004562	hsa-miR-196a*	5893	RAD52	-0.48	http://www.microrna.org/microrna/getMrna.do?gene=5893&matureName=hsa-miR-196a*&organism=9606
hsa-miR-196a-3p	MIMAT0004562	hsa-miR-196a*	157570	ESCO2	-0.18	http://www.microrna.org/microrna/getMrna.do?gene=157570&matureName=hsa-miR-196a*&organism=9606
hsa-miR-196a-3p	MIMAT0004562	hsa-miR-196a*	10107	TRIM10	-0.12	http://www.microrna.org/microrna/getMrna.do?gene=10107&matureName=hsa-miR-196a*&organism=9606
hsa-miR-196a-3p	MIMAT0004562	hsa-miR-196a*	2254	FGF9	-0.42	http://www.microrna.org/microrna/getMrna.do?gene=2254&matureName=hsa-miR-196a*&organism=9606
hsa-miR-196a-3p	MIMAT0004562	hsa-miR-196a*	6559	SLC12A3	-0.18	http://www.microrna.org/microrna/getMrna.do?gene=6559&matureName=hsa-miR-196a*&organism=9606
hsa-miR-196a-3p	MIMAT0004562	hsa-miR-196a*	1788	DNMT3A	-0.64	http://www.microrna.org/microrna/getMrna.do?gene=1788&matureName=hsa-miR-196a*&organism=9606
hsa-miR-196a-3p	MIMAT0004562	hsa-miR-196a*	65109	UPF3B	-0.13	http://www.microrna.org/microrna/getMrna.do?gene=65109&matureName=hsa-miR-196a*&organism=9606
hsa-miR-196a-3p	MIMAT0004562	hsa-miR-196a*	56950	SMYD2	-0.52	http://www.microrna.org/microrna/getMrna.do?gene=56950&matureName=hsa-miR-196a*&organism=9606
hsa-miR-196a-3p	MIMAT0004562	hsa-miR-196a*	7172	TPMT	-0.21	http://www.microrna.org/microrna/getMrna.do?gene=7172&matureName=hsa-miR-196a*&organism=9606
hsa-miR-196a-3p	MIMAT0004562	hsa-miR-196a*	7172	TPMT	-0.17	http://www.microrna.org/microrna/getMrna.do?gene=7172&matureName=hsa-miR-196a*&organism=9606
hsa-miR-196a-3p	MIMAT0004562	hsa-miR-196a*	57176	VARS2	-0.11	http://www.microrna.org/microrna/getMrna.do?gene=57176&matureName=hsa-miR-196a*&organism=9606
hsa-miR-196a-3p	MIMAT0004562	hsa-miR-196a*	10817	FRS3	-0.78	http://www.microrna.org/microrna/getMrna.do?gene=10817&matureName=hsa-miR-196a*&organism=9606
hsa-miR-196a-3p	MIMAT0004562	hsa-miR-196a*	79807	GSTCD	-0.13	http://www.microrna.org/microrna/getMrna.do?gene=79807&matureName=hsa-miR-196a*&organism=9606
hsa-miR-196a-3p	MIMAT0004562	hsa-miR-196a*	729830	FAM160A1	-0.14	http://www.microrna.org/microrna/getMrna.do?gene=729830&matureName=hsa-miR-196a*&organism=9606
hsa-miR-196a-3p	MIMAT0004562	hsa-miR-196a*	729830	FAM160A1	-0.11	http://www.microrna.org/microrna/getMrna.do?gene=729830&matureName=hsa-miR-196a*&organism=9606
hsa-miR-196a-3p	MIMAT0004562	hsa-miR-196a*	117531	TMC1	-0.12	http://www.microrna.org/microrna/getMrna.do?gene=117531&matureName=hsa-miR-196a*&organism=9606
hsa-miR-196a-3p	MIMAT0004562	hsa-miR-196a*	890	CCNA2	-0.14	http://www.microrna.org/microrna/getMrna.do?gene=890&matureName=hsa-miR-196a*&organism=9606
hsa-miR-196a-3p	MIMAT0004562	hsa-miR-196a*	22919	MAPRE1	-1.25	http://www.microrna.org/microrna/getMrna.do?gene=22919&matureName=hsa-miR-196a*&organism=9606
hsa-miR-196a-3p	MIMAT0004562	hsa-miR-196a*	22919	MAPRE1	-0.11	http://www.microrna.org/microrna/getMrna.do?gene=22919&matureName=hsa-miR-196a*&organism=9606
hsa-miR-196a-3p	MIMAT0004562	hsa-miR-196a*	81559	TRIM11	-0.25	http://www.microrna.org/microrna/getMrna.do?gene=81559&matureName=hsa-miR-196a*&organism=9606
hsa-miR-196a-3p	MIMAT0004562	hsa-miR-196a*	3840	KPNA4	-0.13	http://www.microrna.org/microrna/getMrna.do?gene=3840&matureName=hsa-miR-196a*&organism=9606
hsa-miR-196a-3p	MIMAT0004562	hsa-miR-196a*	148229	ATP8B3	-0.23	http://www.microrna.org/microrna/getMrna.do?gene=148229&matureName=hsa-miR-196a*&organism=9606
hsa-miR-196a-3p	MIMAT0004562	hsa-miR-196a*	51270	TFDP3	-0.8	http://www.microrna.org/microrna/getMrna.do?gene=51270&matureName=hsa-miR-196a*&organism=9606
hsa-miR-196a-3p	MIMAT0004562	hsa-miR-196a*	26036	ZNF451	-0.16	http://www.microrna.org/microrna/getMrna.do?gene=26036&matureName=hsa-miR-196a*&organism=9606
hsa-miR-196a-3p	MIMAT0004562	hsa-miR-196a*	51340	CRNKL1	-0.99	http://www.microrna.org/microrna/getMrna.do?gene=51340&matureName=hsa-miR-196a*&organism=9606
hsa-miR-196a-3p	MIMAT0004562	hsa-miR-196a*	222865	TMEM130	-0.11	http://www.microrna.org/microrna/getMrna.do?gene=222865&matureName=hsa-miR-196a*&organism=9606
hsa-miR-196a-3p	MIMAT0004562	hsa-miR-196a*	55727	BTBD7	-0.22	http://www.microrna.org/microrna/getMrna.do?gene=55727&matureName=hsa-miR-196a*&organism=9606
hsa-miR-196a-3p	MIMAT0004562	hsa-miR-196a*	10618	TGOLN2	-0.34	http://www.microrna.org/microrna/getMrna.do?gene=10618&matureName=hsa-miR-196a*&organism=9606
hsa-miR-196a-3p	MIMAT0004562	hsa-miR-196a*	8663	EIF3C	-0.85	http://www.microrna.org/microrna/getMrna.do?gene=8663&matureName=hsa-miR-196a*&organism=9606
hsa-miR-196a-3p	MIMAT0004562	hsa-miR-196a*	57176	VARS2	-0.12	http://www.microrna.org/microrna/getMrna.do?gene=57176&matureName=hsa-miR-196a*&organism=9606
hsa-miR-196a-3p	MIMAT0004562	hsa-miR-196a*	219	ALDH1B1	-0.95	http://www.microrna.org/microrna/getMrna.do?gene=219&matureName=hsa-miR-196a*&organism=9606
hsa-miR-196a-3p	MIMAT0004562	hsa-miR-196a*	84067	FAM160A2	-0.38	http://www.microrna.org/microrna/getMrna.do?gene=84067&matureName=hsa-miR-196a*&organism=9606
hsa-miR-196a-3p	MIMAT0004562	hsa-miR-196a*	4036	LRP2	-0.11	http://www.microrna.org/microrna/getMrna.do?gene=4036&matureName=hsa-miR-196a*&organism=9606
hsa-miR-196a-3p	MIMAT0004562	hsa-miR-196a*	10973	ASCC3	-1.27	http://www.microrna.org/microrna/getMrna.do?gene=10973&matureName=hsa-miR-196a*&organism=9606
hsa-miR-196a-3p	MIMAT0004562	hsa-miR-196a*	9699	RIMS2	-1.26	http://www.microrna.org/microrna/getMrna.do?gene=9699&matureName=hsa-miR-196a*&organism=9606
hsa-miR-196a-3p	MIMAT0004562	hsa-miR-196a*	4919	ROR1	-0.54	http://www.microrna.org/microrna/getMrna.do?gene=4919&matureName=hsa-miR-196a*&organism=9606
hsa-miR-196a-3p	MIMAT0004562	hsa-miR-196a*	8666	EIF3G	-0.33	http://www.microrna.org/microrna/getMrna.do?gene=8666&matureName=hsa-miR-196a*&organism=9606
hsa-miR-196a-3p	MIMAT0004562	hsa-miR-196a*	51077	FCF1	-0.85	http://www.microrna.org/microrna/getMrna.do?gene=51077&matureName=hsa-miR-196a*&organism=9606
hsa-miR-196a-3p	MIMAT0004562	hsa-miR-196a*	100289299	FAM23B	-0.18	http://www.microrna.org/microrna/getMrna.do?gene=100289299&matureName=hsa-miR-196a*&organism=9606
hsa-miR-196a-3p	MIMAT0004562	hsa-miR-196a*	100302090	DDX11L11	-0.17	http://www.microrna.org/microrna/getMrna.do?gene=100302090&matureName=hsa-miR-196a*&organism=9606
hsa-miR-196a-3p	MIMAT0004562	hsa-miR-196a*	9638	FEZ1	-0.26	http://www.microrna.org/microrna/getMrna.do?gene=9638&matureName=hsa-miR-196a*&organism=9606
hsa-miR-196a-3p	MIMAT0004562	hsa-miR-196a*	646600	C3orf65	-0.26	http://www.microrna.org/microrna/getMrna.do?gene=646600&matureName=hsa-miR-196a*&organism=9606
hsa-miR-196a-3p	MIMAT0004562	hsa-miR-196a*	131616	TMEM42	-0.79	http://www.microrna.org/microrna/getMrna.do?gene=131616&matureName=hsa-miR-196a*&organism=9606
hsa-miR-196a-3p	MIMAT0004562	hsa-miR-196a*	79669	C3orf52	-0.73	http://www.microrna.org/microrna/getMrna.do?gene=79669&matureName=hsa-miR-196a*&organism=9606
hsa-miR-196a-3p	MIMAT0004562	hsa-miR-196a*	65977	PLEKHA3	-1.16	http://www.microrna.org/microrna/getMrna.do?gene=65977&matureName=hsa-miR-196a*&organism=9606
hsa-miR-196a-3p	MIMAT0004562	hsa-miR-196a*	128817	CSTL1	-0.3	http://www.microrna.org/microrna/getMrna.do?gene=128817&matureName=hsa-miR-196a*&organism=9606
hsa-miR-196a-3p	MIMAT0004562	hsa-miR-196a*	85464	SSH2	-0.1	http://www.microrna.org/microrna/getMrna.do?gene=85464&matureName=hsa-miR-196a*&organism=9606
hsa-miR-196a-3p	MIMAT0004562	hsa-miR-196a*	5584	PRKCI	-0.94	http://www.microrna.org/microrna/getMrna.do?gene=5584&matureName=hsa-miR-196a*&organism=9606
hsa-miR-196a-3p	MIMAT0004562	hsa-miR-196a*	146057	TTBK2	-0.65	http://www.microrna.org/microrna/getMrna.do?gene=146057&matureName=hsa-miR-196a*&organism=9606
hsa-miR-196a-3p	MIMAT0004562	hsa-miR-196a*	9940	DLEC1	-0.91	http://www.microrna.org/microrna/getMrna.do?gene=9940&matureName=hsa-miR-196a*&organism=9606
hsa-miR-196a-3p	MIMAT0004562	hsa-miR-196a*	8566	PDXK	-0.12	http://www.microrna.org/microrna/getMrna.do?gene=8566&matureName=hsa-miR-196a*&organism=9606
hsa-miR-196a-3p	MIMAT0004562	hsa-miR-196a*	200312	RNF215	-0.16	http://www.microrna.org/microrna/getMrna.do?gene=200312&matureName=hsa-miR-196a*&organism=9606
hsa-miR-196a-3p	MIMAT0004562	hsa-miR-196a*	343068	PRAMEF5	-0.16	http://www.microrna.org/microrna/getMrna.do?gene=343068&matureName=hsa-miR-196a*&organism=9606
[truncated: 69,932 more rows]

## Sheet: microcosm
mirbase19	matuacc	SEQ	SCORE	PVALUE	TRANSCRIPT_ID	EXTERNAL_NAME	target detailed view
hsa-miR-146a-5p	MIMAT0000449	hsa-miR-146a	17.3	0.01	ENST00000315425	TMEM185B	http://www.ebi.ac.uk/enright-srv/microcosm/cgi-bin/targets/v5/detail_view.pl?transcript_id=ENST00000315425
hsa-miR-20a-5p	MIMAT0000075	hsa-miR-20a	18.43	2.4292e-09	ENST00000263708	PTPN4	http://www.ebi.ac.uk/enright-srv/microcosm/cgi-bin/targets/v5/detail_view.pl?transcript_id=ENST00000263708
hsa-miR-20a-5p	MIMAT0000075	hsa-miR-20a	17.21	2.4292e-09	ENST00000263708	PTPN4	http://www.ebi.ac.uk/enright-srv/microcosm/cgi-bin/targets/v5/detail_view.pl?transcript_id=ENST00000263708
hsa-miR-20a-5p	MIMAT0000075	hsa-miR-20a	16.96	0.0017754	ENST00000334816	NP_001017927.1	http://www.ebi.ac.uk/enright-srv/microcosm/cgi-bin/targets/v5/detail_view.pl?transcript_id=ENST00000334816
hsa-miR-138-1-3p	MIMAT0004607	hsa-miR-138-1*	15.82	0.03	ENST00000272520	C1QL2	http://www.ebi.ac.uk/enright-srv/microcosm/cgi-bin/targets/v5/detail_view.pl?transcript_id=ENST00000272520
hsa-miR-136-3p	MIMAT0004606	hsa-miR-136*	14.31	0.0094292	ENST00000263239	DDX18	http://www.ebi.ac.uk/enright-srv/microcosm/cgi-bin/targets/v5/detail_view.pl?transcript_id=ENST00000263239
hsa-miR-146a-5p	MIMAT0000449	hsa-miR-146a	15.57	3.7936e-05	ENST00000263238	ACTR3	http://www.ebi.ac.uk/enright-srv/microcosm/cgi-bin/targets/v5/detail_view.pl?transcript_id=ENST00000263238
hsa-miR-20a-5p	MIMAT0000075	hsa-miR-20a	17.17	0.02	ENST00000245680	SLC35F5	http://www.ebi.ac.uk/enright-srv/microcosm/cgi-bin/targets/v5/detail_view.pl?transcript_id=ENST00000245680
hsa-miR-196a-3p	MIMAT0004562	hsa-miR-196a*	16.3	0.03	ENST00000358557	Q6VEP5_HUMAN	http://www.ebi.ac.uk/enright-srv/microcosm/cgi-bin/targets/v5/detail_view.pl?transcript_id=ENST00000358557
hsa-miR-136-3p	MIMAT0004606	hsa-miR-136*	15.33	0.03	ENST00000358604	CBWD2	http://www.ebi.ac.uk/enright-srv/microcosm/cgi-bin/targets/v5/detail_view.pl?transcript_id=ENST00000358604
hsa-miR-196a-3p	MIMAT0004562	hsa-miR-196a*	16.43	0.02	ENST00000259205	IL1F9	http://www.ebi.ac.uk/enright-srv/microcosm/cgi-bin/targets/v5/detail_view.pl?transcript_id=ENST00000259205
hsa-miR-224-5p	MIMAT0000281	hsa-miR-224	16.3	0.03	ENST00000259205	IL1F9	http://www.ebi.ac.uk/enright-srv/microcosm/cgi-bin/targets/v5/detail_view.pl?transcript_id=ENST00000259205
hsa-miR-136-3p	MIMAT0004606	hsa-miR-136*	16.51	0.01	ENST00000327581	NT5DC4	http://www.ebi.ac.uk/enright-srv/microcosm/cgi-bin/targets/v5/detail_view.pl?transcript_id=ENST00000327581
hsa-miR-199b-5p	MIMAT0000263	hsa-miR-199b-5p	16.55	0.03	ENST00000324913	CHCHD5	http://www.ebi.ac.uk/enright-srv/microcosm/cgi-bin/targets/v5/detail_view.pl?transcript_id=ENST00000324913
hsa-miR-224-5p	MIMAT0000281	hsa-miR-224	15.83	0.0066924	ENST00000272570	ZC3H8	http://www.ebi.ac.uk/enright-srv/microcosm/cgi-bin/targets/v5/detail_view.pl?transcript_id=ENST00000272570
hsa-miR-136-3p	MIMAT0004606	hsa-miR-136*	14.49	0.0079147	ENST00000272570	ZC3H8	http://www.ebi.ac.uk/enright-srv/microcosm/cgi-bin/targets/v5/detail_view.pl?transcript_id=ENST00000272570
hsa-miR-138-1-3p	MIMAT0004607	hsa-miR-138-1*	17.22	0.0079563	ENST00000272570	ZC3H8	http://www.ebi.ac.uk/enright-srv/microcosm/cgi-bin/targets/v5/detail_view.pl?transcript_id=ENST00000272570
hsa-miR-146a-5p	MIMAT0000449	hsa-miR-146a	16.7	0.02	ENST00000389566	TMEM87B	http://www.ebi.ac.uk/enright-srv/microcosm/cgi-bin/targets/v5/detail_view.pl?transcript_id=ENST00000389566
hsa-miR-100-5p	MIMAT0000098	hsa-miR-100	14.23	0.0028025	ENST00000283206	TMEM87B	http://www.ebi.ac.uk/enright-srv/microcosm/cgi-bin/targets/v5/detail_view.pl?transcript_id=ENST00000283206
hsa-miR-146a-5p	MIMAT0000449	hsa-miR-146a	16.86	0.0025009	ENST00000283206	TMEM87B	http://www.ebi.ac.uk/enright-srv/microcosm/cgi-bin/targets/v5/detail_view.pl?transcript_id=ENST00000283206
hsa-miR-196a-3p	MIMAT0004562	hsa-miR-196a*	15.8	0.04	ENST00000341068	ANAPC1	http://www.ebi.ac.uk/enright-srv/microcosm/cgi-bin/targets/v5/detail_view.pl?transcript_id=ENST00000341068
hsa-miR-224-5p	MIMAT0000281	hsa-miR-224	16	0.01	ENST00000341068	ANAPC1	http://www.ebi.ac.uk/enright-srv/microcosm/cgi-bin/targets/v5/detail_view.pl?transcript_id=ENST00000341068
hsa-miR-20a-5p	MIMAT0000075	hsa-miR-20a	17.98	0.03	ENST00000337565	BCL2L11	http://www.ebi.ac.uk/enright-srv/microcosm/cgi-bin/targets/v5/detail_view.pl?transcript_id=ENST00000337565
hsa-miR-100-5p	MIMAT0000098	hsa-miR-100	15.23	0.02	ENST00000357757	BCL2L11	http://www.ebi.ac.uk/enright-srv/microcosm/cgi-bin/targets/v5/detail_view.pl?transcript_id=ENST00000357757
hsa-miR-136-3p	MIMAT0004606	hsa-miR-136*	15.12	0.04	ENST00000357757	BCL2L11	http://www.ebi.ac.uk/enright-srv/microcosm/cgi-bin/targets/v5/detail_view.pl?transcript_id=ENST00000357757
hsa-miR-20a-5p	MIMAT0000075	hsa-miR-20a	17.67	0.0019833	ENST00000309415	SH3MD4	http://www.ebi.ac.uk/enright-srv/microcosm/cgi-bin/targets/v5/detail_view.pl?transcript_id=ENST00000309415
hsa-miR-199b-5p	MIMAT0000263	hsa-miR-199b-5p	18.12	0.00033529	ENST00000283195	RANBP2	http://www.ebi.ac.uk/enright-srv/microcosm/cgi-bin/targets/v5/detail_view.pl?transcript_id=ENST00000283195
hsa-miR-20a-5p	MIMAT0000075	hsa-miR-20a	16.51	0.01	ENST00000322353	Q9BSY8_HUMAN	http://www.ebi.ac.uk/enright-srv/microcosm/cgi-bin/targets/v5/detail_view.pl?transcript_id=ENST00000322353
hsa-miR-100-5p	MIMAT0000098	hsa-miR-100	14.59	0.04	ENST00000303432	null	http://www.ebi.ac.uk/enright-srv/microcosm/cgi-bin/targets/v5/detail_view.pl?transcript_id=ENST00000303432
hsa-miR-20a-5p	MIMAT0000075	hsa-miR-20a	17.54	0.00095969	ENST00000334627	null	http://www.ebi.ac.uk/enright-srv/microcosm/cgi-bin/targets/v5/detail_view.pl?transcript_id=ENST00000334627
hsa-miR-20a-5p	MIMAT0000075	hsa-miR-20a	17.34	0.00095969	ENST00000334627	null	http://www.ebi.ac.uk/enright-srv/microcosm/cgi-bin/targets/v5/detail_view.pl?transcript_id=ENST00000334627
hsa-miR-100-5p	MIMAT0000098	hsa-miR-100	13.9	0.00051994	ENST00000283148	UXS1	http://www.ebi.ac.uk/enright-srv/microcosm/cgi-bin/targets/v5/detail_view.pl?transcript_id=ENST00000283148
hsa-miR-224-5p	MIMAT0000281	hsa-miR-224	15.72	0.0027791	ENST00000336660	FHL2	http://www.ebi.ac.uk/enright-srv/microcosm/cgi-bin/targets/v5/detail_view.pl?transcript_id=ENST00000336660
hsa-miR-224-5p	MIMAT0000281	hsa-miR-224	15.61	0.0027791	ENST00000336660	FHL2	http://www.ebi.ac.uk/enright-srv/microcosm/cgi-bin/targets/v5/detail_view.pl?transcript_id=ENST00000336660
hsa-miR-224-5p	MIMAT0000281	hsa-miR-224	16.37	0.0027517	ENST00000344213	FHL2	http://www.ebi.ac.uk/enright-srv/microcosm/cgi-bin/targets/v5/detail_view.pl?transcript_id=ENST00000344213
hsa-miR-224-5p	MIMAT0000281	hsa-miR-224	16.83	0.0024792	ENST00000322142	FHL2	http://www.ebi.ac.uk/enright-srv/microcosm/cgi-bin/targets/v5/detail_view.pl?transcript_id=ENST00000322142
hsa-miR-224-5p	MIMAT0000281	hsa-miR-224	15.68	0.0024792	ENST00000322142	FHL2	http://www.ebi.ac.uk/enright-srv/microcosm/cgi-bin/targets/v5/detail_view.pl?transcript_id=ENST00000322142
hsa-miR-224-5p	MIMAT0000281	hsa-miR-224	16.36	0.03	ENST00000358129	FHL2	http://www.ebi.ac.uk/enright-srv/microcosm/cgi-bin/targets/v5/detail_view.pl?transcript_id=ENST00000358129
hsa-miR-146a-5p	MIMAT0000449	hsa-miR-146a	15.69	0.0056443	ENST00000258449	TGFBRAP1	http://www.ebi.ac.uk/enright-srv/microcosm/cgi-bin/targets/v5/detail_view.pl?transcript_id=ENST00000258449
hsa-miR-136-3p	MIMAT0004606	hsa-miR-136*	15.5	0.03	ENST00000258456	GPR45	http://www.ebi.ac.uk/enright-srv/microcosm/cgi-bin/targets/v5/detail_view.pl?transcript_id=ENST00000258456
hsa-miR-100-5p	MIMAT0000098	hsa-miR-100	14.71	0.04	ENST00000361502	Q6UXP0_HUMAN	http://www.ebi.ac.uk/enright-srv/microcosm/cgi-bin/targets/v5/detail_view.pl?transcript_id=ENST00000361502
hsa-miR-138-1-3p	MIMAT0004607	hsa-miR-138-1*	16.92	0.01	ENST00000289382	C2orf29	http://www.ebi.ac.uk/enright-srv/microcosm/cgi-bin/targets/v5/detail_view.pl?transcript_id=ENST00000289382
hsa-miR-199b-5p	MIMAT0000263	hsa-miR-199b-5p	16.84	0.02	ENST00000389673	TBC1D8	http://www.ebi.ac.uk/enright-srv/microcosm/cgi-bin/targets/v5/detail_view.pl?transcript_id=ENST00000389673
hsa-miR-199b-5p	MIMAT0000263	hsa-miR-199b-5p	17.77	0.0002023	ENST00000376840	TBC1D8	http://www.ebi.ac.uk/enright-srv/microcosm/cgi-bin/targets/v5/detail_view.pl?transcript_id=ENST00000376840
hsa-miR-196a-3p	MIMAT0004562	hsa-miR-196a*	16.39	0.0063106	ENST00000302393	LONRF2	http://www.ebi.ac.uk/enright-srv/microcosm/cgi-bin/targets/v5/detail_view.pl?transcript_id=ENST00000302393
hsa-miR-199b-5p	MIMAT0000263	hsa-miR-199b-5p	17.16	0.0022005	ENST00000289371	EIF5B	http://www.ebi.ac.uk/enright-srv/microcosm/cgi-bin/targets/v5/detail_view.pl?transcript_id=ENST00000289371
hsa-miR-199b-5p	MIMAT0000263	hsa-miR-199b-5p	16.05	0.0022005	ENST00000289371	EIF5B	http://www.ebi.ac.uk/enright-srv/microcosm/cgi-bin/targets/v5/detail_view.pl?transcript_id=ENST00000289371
hsa-miR-100-5p	MIMAT0000098	hsa-miR-100	14.55	0.04	ENST00000333017	LYG2_HUMAN	http://www.ebi.ac.uk/enright-srv/microcosm/cgi-bin/targets/v5/detail_view.pl?transcript_id=ENST00000333017
hsa-miR-199b-5p	MIMAT0000263	hsa-miR-199b-5p	19.23	0.0013642	ENST00000333017	LYG2_HUMAN	http://www.ebi.ac.uk/enright-srv/microcosm/cgi-bin/targets/v5/detail_view.pl?transcript_id=ENST00000333017
hsa-miR-100-5p	MIMAT0000098	hsa-miR-100	14.62	0.0059229	ENST00000308644	MRPL30	http://www.ebi.ac.uk/enright-srv/microcosm/cgi-bin/targets/v5/detail_view.pl?transcript_id=ENST00000308644
hsa-miR-136-3p	MIMAT0004606	hsa-miR-136*	16.63	0.01	ENST00000308644	MRPL30	http://www.ebi.ac.uk/enright-srv/microcosm/cgi-bin/targets/v5/detail_view.pl?transcript_id=ENST00000308644
hsa-miR-136-3p	MIMAT0004606	hsa-miR-136*	15.75	0.02	ENST00000338148	MRPL30	http://www.ebi.ac.uk/enright-srv/microcosm/cgi-bin/targets/v5/detail_view.pl?transcript_id=ENST00000338148
hsa-miR-20a-5p	MIMAT0000075	hsa-miR-20a	17.95	0.03	ENST00000302513	C2orf15	http://www.ebi.ac.uk/enright-srv/microcosm/cgi-bin/targets/v5/detail_view.pl?transcript_id=ENST00000302513
hsa-miR-20a-5p	MIMAT0000075	hsa-miR-20a	17.34	0.0089375	ENST00000359817	NM_207362.2	http://www.ebi.ac.uk/enright-srv/microcosm/cgi-bin/targets/v5/detail_view.pl?transcript_id=ENST00000359817
hsa-miR-199b-5p	MIMAT0000263	hsa-miR-199b-5p	16.17	0.04	ENST00000357765	UNC50	http://www.ebi.ac.uk/enright-srv/microcosm/cgi-bin/targets/v5/detail_view.pl?transcript_id=ENST00000357765
hsa-miR-199b-5p	MIMAT0000263	hsa-miR-199b-5p	17.08	0.01	ENST00000358269	NP_659429.4	http://www.ebi.ac.uk/enright-srv/microcosm/cgi-bin/targets/v5/detail_view.pl?transcript_id=ENST00000358269
hsa-miR-20a-5p	MIMAT0000075	hsa-miR-20a	16.6	0.0082995	ENST00000355889	NP_659429.4	http://www.ebi.ac.uk/enright-srv/microcosm/cgi-bin/targets/v5/detail_view.pl?transcript_id=ENST00000355889
hsa-miR-20a-5p	MIMAT0000075	hsa-miR-20a	17.74	0.03	ENST00000258459	KIAA1641	http://www.ebi.ac.uk/enright-srv/microcosm/cgi-bin/targets/v5/detail_view.pl?transcript_id=ENST00000258459
hsa-miR-20a-5p	MIMAT0000075	hsa-miR-20a	17.74	0.03	ENST00000358576	NP_079466.2	http://www.ebi.ac.uk/enright-srv/microcosm/cgi-bin/targets/v5/detail_view.pl?transcript_id=ENST00000358576
hsa-miR-138-1-3p	MIMAT0004607	hsa-miR-138-1*	16.32	0.02	ENST00000335938	NP_079466.2	http://www.ebi.ac.uk/enright-srv/microcosm/cgi-bin/targets/v5/detail_view.pl?transcript_id=ENST00000335938
hsa-miR-138-1-3p	MIMAT0004607	hsa-miR-138-1*	15.78	0.03	ENST00000318357	ANKRD23	http://www.ebi.ac.uk/enright-srv/microcosm/cgi-bin/targets/v5/detail_view.pl?transcript_id=ENST00000318357
hsa-miR-20a-5p	MIMAT0000075	hsa-miR-20a	16.63	0.00037368	ENST00000305510	CNNM3	http://www.ebi.ac.uk/enright-srv/microcosm/cgi-bin/targets/v5/detail_view.pl?transcript_id=ENST00000305510
hsa-miR-199b-5p	MIMAT0000263	hsa-miR-199b-5p	15.94	1e-06	ENST00000357485	ARID5A	http://www.ebi.ac.uk/enright-srv/microcosm/cgi-bin/targets/v5/detail_view.pl?transcript_id=ENST00000357485
hsa-miR-199b-5p	MIMAT0000263	hsa-miR-199b-5p	15.94	1e-06	ENST00000357485	ARID5A	http://www.ebi.ac.uk/enright-srv/microcosm/cgi-bin/targets/v5/detail_view.pl?transcript_id=ENST00000357485
hsa-miR-196a-3p	MIMAT0004562	hsa-miR-196a*	15.11	0.01	ENST00000337288	STARD7	http://www.ebi.ac.uk/enright-srv/microcosm/cgi-bin/targets/v5/detail_view.pl?transcript_id=ENST00000337288
hsa-miR-100-5p	MIMAT0000098	hsa-miR-100	14.53	0.0025312	ENST00000288943	DUSP2	http://www.ebi.ac.uk/enright-srv/microcosm/cgi-bin/targets/v5/detail_view.pl?transcript_id=ENST00000288943
hsa-miR-20a-5p	MIMAT0000075	hsa-miR-20a	17.74	0.03	ENST00000357042	Q53S06_HUMAN	http://www.ebi.ac.uk/enright-srv/microcosm/cgi-bin/targets/v5/detail_view.pl?transcript_id=ENST00000357042
hsa-miR-196a-3p	MIMAT0004562	hsa-miR-196a*	15.76	0.0015622	ENST00000306515	Q8NHC1_HUMAN	http://www.ebi.ac.uk/enright-srv/microcosm/cgi-bin/targets/v5/detail_view.pl?transcript_id=ENST00000306515
hsa-miR-196a-3p	MIMAT0004562	hsa-miR-196a*	15.66	0.0015622	ENST00000306515	Q8NHC1_HUMAN	http://www.ebi.ac.uk/enright-srv/microcosm/cgi-bin/targets/v5/detail_view.pl?transcript_id=ENST00000306515
hsa-miR-196a-3p	MIMAT0004562	hsa-miR-196a*	15.91	0.04	ENST00000272418	MRPS5	http://www.ebi.ac.uk/enright-srv/microcosm/cgi-bin/targets/v5/detail_view.pl?transcript_id=ENST00000272418
hsa-miR-138-1-3p	MIMAT0004607	hsa-miR-138-1*	16.14	0.02	ENST00000309988	MAL	http://www.ebi.ac.uk/enright-srv/microcosm/cgi-bin/targets/v5/detail_view.pl?transcript_id=ENST00000309988
hsa-miR-138-1-3p	MIMAT0004607	hsa-miR-138-1*	16.24	0.0045962	ENST00000339048	null	http://www.ebi.ac.uk/enright-srv/microcosm/cgi-bin/targets/v5/detail_view.pl?transcript_id=ENST00000339048
hsa-miR-138-1-3p	MIMAT0004607	hsa-miR-138-1*	15.5	0.04	ENST00000390278	IGKV1D-42	http://www.ebi.ac.uk/enright-srv/microcosm/cgi-bin/targets/v5/detail_view.pl?transcript_id=ENST00000390278
hsa-miR-146a-5p	MIMAT0000449	hsa-miR-146a	16.31	0.04	ENST00000390274	IGKV3D-15	http://www.ebi.ac.uk/enright-srv/microcosm/cgi-bin/targets/v5/detail_view.pl?transcript_id=ENST00000390274
hsa-miR-196a-3p	MIMAT0004562	hsa-miR-196a*	16	0.04	ENST00000390271	IGKV6D-41	http://www.ebi.ac.uk/enright-srv/microcosm/cgi-bin/targets/v5/detail_view.pl?transcript_id=ENST00000390271
hsa-miR-146a-5p	MIMAT0000449	hsa-miR-146a	16.31	0.04	ENST00000390252	IGKV3-15	http://www.ebi.ac.uk/enright-srv/microcosm/cgi-bin/targets/v5/detail_view.pl?transcript_id=ENST00000390252
hsa-miR-138-1-3p	MIMAT0004607	hsa-miR-138-1*	15.64	0.04	ENST00000357453	null	http://www.ebi.ac.uk/enright-srv/microcosm/cgi-bin/targets/v5/detail_view.pl?transcript_id=ENST00000357453
hsa-miR-224-5p	MIMAT0000281	hsa-miR-224	16.18	0.004648	ENST00000303236	EIF2AK3	http://www.ebi.ac.uk/enright-srv/microcosm/cgi-bin/targets/v5/detail_view.pl?transcript_id=ENST00000303236
hsa-miR-136-3p	MIMAT0004606	hsa-miR-136*	14.71	0.01	ENST00000303236	EIF2AK3	http://www.ebi.ac.uk/enright-srv/microcosm/cgi-bin/targets/v5/detail_view.pl?transcript_id=ENST00000303236
hsa-miR-146a-5p	MIMAT0000449	hsa-miR-146a	15.55	0.0036646	ENST00000347055	KRCC1	http://www.ebi.ac.uk/enright-srv/microcosm/cgi-bin/targets/v5/detail_view.pl?transcript_id=ENST00000347055
hsa-miR-199b-5p	MIMAT0000263	hsa-miR-199b-5p	15.73	0.0044359	ENST00000359481	PLGLB1	http://www.ebi.ac.uk/enright-srv/microcosm/cgi-bin/targets/v5/detail_view.pl?transcript_id=ENST00000359481
hsa-miR-196a-3p	MIMAT0004562	hsa-miR-196a*	15.8	0.0083632	ENST00000377273	null	http://www.ebi.ac.uk/enright-srv/microcosm/cgi-bin/targets/v5/detail_view.pl?transcript_id=ENST00000377273
hsa-miR-100-5p	MIMAT0000098	hsa-miR-100	14.59	0.04	ENST00000337868	CD8B	http://www.ebi.ac.uk/enright-srv/microcosm/cgi-bin/targets/v5/detail_view.pl?transcript_id=ENST00000337868
hsa-miR-146a-5p	MIMAT0000449	hsa-miR-146a	15.39	0.0076702	ENST00000356753	JMJD1A	http://www.ebi.ac.uk/enright-srv/microcosm/cgi-bin/targets/v5/detail_view.pl?transcript_id=ENST00000356753
hsa-miR-100-5p	MIMAT0000098	hsa-miR-100	15	0.03	ENST00000254644	MRPL35	http://www.ebi.ac.uk/enright-srv/microcosm/cgi-bin/targets/v5/detail_view.pl?transcript_id=ENST00000254644
hsa-miR-136-3p	MIMAT0004606	hsa-miR-136*	14.55	0.0094174	ENST00000377332	ST3GAL5	http://www.ebi.ac.uk/enright-srv/microcosm/cgi-bin/targets/v5/detail_view.pl?transcript_id=ENST00000377332
hsa-miR-146a-5p	MIMAT0000449	hsa-miR-146a	15.85	0.00082248	ENST00000306279	ATOH8	http://www.ebi.ac.uk/enright-srv/microcosm/cgi-bin/targets/v5/detail_view.pl?transcript_id=ENST00000306279
hsa-miR-100-5p	MIMAT0000098	hsa-miR-100	15.14	6.289e-05	ENST00000323701	USP39	http://www.ebi.ac.uk/enright-srv/microcosm/cgi-bin/targets/v5/detail_view.pl?transcript_id=ENST00000323701
hsa-miR-138-1-3p	MIMAT0004607	hsa-miR-138-1*	15.68	0.03	ENST00000323701	USP39	http://www.ebi.ac.uk/enright-srv/microcosm/cgi-bin/targets/v5/detail_view.pl?transcript_id=ENST00000323701
hsa-miR-138-1-3p	MIMAT0004607	hsa-miR-138-1*	15.19	0.0030804	ENST00000334462	TMEM150	http://www.ebi.ac.uk/enright-srv/microcosm/cgi-bin/targets/v5/detail_view.pl?transcript_id=ENST00000334462
hsa-miR-138-1-3p	MIMAT0004607	hsa-miR-138-1*	14.98	0.0030804	ENST00000334462	TMEM150	http://www.ebi.ac.uk/enright-srv/microcosm/cgi-bin/targets/v5/detail_view.pl?transcript_id=ENST00000334462
hsa-miR-138-1-3p	MIMAT0004607	hsa-miR-138-1*	15.19	0.0030991	ENST00000306353	TMEM150	http://www.ebi.ac.uk/enright-srv/microcosm/cgi-bin/targets/v5/detail_view.pl?transcript_id=ENST00000306353
hsa-miR-138-1-3p	MIMAT0004607	hsa-miR-138-1*	14.98	0.0030991	ENST00000306353	TMEM150	http://www.ebi.ac.uk/enright-srv/microcosm/cgi-bin/targets/v5/detail_view.pl?transcript_id=ENST00000306353
hsa-miR-146a-5p	MIMAT0000449	hsa-miR-146a	15.98	0.0076586	ENST00000295802	RETSAT	http://www.ebi.ac.uk/enright-srv/microcosm/cgi-bin/targets/v5/detail_view.pl?transcript_id=ENST00000295802
hsa-miR-138-1-3p	MIMAT0004607	hsa-miR-138-1*	15.61	0.04	ENST00000377386	TGOLN2	http://www.ebi.ac.uk/enright-srv/microcosm/cgi-bin/targets/v5/detail_view.pl?transcript_id=ENST00000377386
hsa-miR-100-5p	MIMAT0000098	hsa-miR-100	14.44	0.04	ENST00000233143	TMSB10	http://www.ebi.ac.uk/enright-srv/microcosm/cgi-bin/targets/v5/detail_view.pl?transcript_id=ENST00000233143
hsa-miR-146a-5p	MIMAT0000449	hsa-miR-146a	16.2	0.0011163	ENST00000389394	Q9H030_HUMAN	http://www.ebi.ac.uk/enright-srv/microcosm/cgi-bin/targets/v5/detail_view.pl?transcript_id=ENST00000389394
hsa-miR-136-3p	MIMAT0004606	hsa-miR-136*	16.16	0.01	ENST00000306670	DNAH6	http://www.ebi.ac.uk/enright-srv/microcosm/cgi-bin/targets/v5/detail_view.pl?transcript_id=ENST00000306670
hsa-miR-20a-5p	MIMAT0000075	hsa-miR-20a	16.89	0.03	ENST00000306670	DNAH6	http://www.ebi.ac.uk/enright-srv/microcosm/cgi-bin/targets/v5/detail_view.pl?transcript_id=ENST00000306670
hsa-miR-20a-5p	MIMAT0000075	hsa-miR-20a	17.39	0.04	ENST00000377409	null	http://www.ebi.ac.uk/enright-srv/microcosm/cgi-bin/targets/v5/detail_view.pl?transcript_id=ENST00000377409
hsa-miR-196a-3p	MIMAT0004562	hsa-miR-196a*	16.37	0.03	ENST00000295783	SUCLG1	http://www.ebi.ac.uk/enright-srv/microcosm/cgi-bin/targets/v5/detail_view.pl?transcript_id=ENST00000295783
hsa-miR-199b-5p	MIMAT0000263	hsa-miR-199b-5p	17.3	5.4082e-05	ENST00000295783	SUCLG1	http://www.ebi.ac.uk/enright-srv/microcosm/cgi-bin/targets/v5/detail_view.pl?transcript_id=ENST00000295783
hsa-miR-100-5p	MIMAT0000098	hsa-miR-100	15.52	0.01	ENST00000305249	TACR1	http://www.ebi.ac.uk/enright-srv/microcosm/cgi-bin/targets/v5/detail_view.pl?transcript_id=ENST00000305249
hsa-miR-224-5p	MIMAT0000281	hsa-miR-224	16.74	0.02	ENST00000305249	TACR1	http://www.ebi.ac.uk/enright-srv/microcosm/cgi-bin/targets/v5/detail_view.pl?transcript_id=ENST00000305249
hsa-miR-199b-5p	MIMAT0000263	hsa-miR-199b-5p	16.45	0.03	ENST00000305249	TACR1	http://www.ebi.ac.uk/enright-srv/microcosm/cgi-bin/targets/v5/detail_view.pl?transcript_id=ENST00000305249
hsa-miR-224-5p	MIMAT0000281	hsa-miR-224	16.17	0.04	ENST00000233699	POLE4	http://www.ebi.ac.uk/enright-srv/microcosm/cgi-bin/targets/v5/detail_view.pl?transcript_id=ENST00000233699
hsa-miR-224-5p	MIMAT0000281	hsa-miR-224	15.42	0.01	ENST00000357877	SEMA4F	http://www.ebi.ac.uk/enright-srv/microcosm/cgi-bin/targets/v5/detail_view.pl?transcript_id=ENST00000357877
hsa-miR-146a-5p	MIMAT0000449	hsa-miR-146a	15.91	0.0004331	ENST00000258081	AUP1	http://www.ebi.ac.uk/enright-srv/microcosm/cgi-bin/targets/v5/detail_view.pl?transcript_id=ENST00000258081
hsa-miR-196a-3p	MIMAT0004562	hsa-miR-196a*	16.29	0.03	ENST00000341396	LBX2	http://www.ebi.ac.uk/enright-srv/microcosm/cgi-bin/targets/v5/detail_view.pl?transcript_id=ENST00000341396
hsa-miR-20a-5p	MIMAT0000075	hsa-miR-20a	17.33	0.01	ENST00000290418	NP_116168.2	http://www.ebi.ac.uk/enright-srv/microcosm/cgi-bin/targets/v5/detail_view.pl?transcript_id=ENST00000290418
hsa-miR-136-3p	MIMAT0004606	hsa-miR-136*	16.2	0.01	ENST00000233331	ZNHIT4	http://www.ebi.ac.uk/enright-srv/microcosm/cgi-bin/targets/v5/detail_view.pl?transcript_id=ENST00000233331
hsa-miR-196a-3p	MIMAT0004562	hsa-miR-196a*	16	0.04	ENST00000290390	null	http://www.ebi.ac.uk/enright-srv/microcosm/cgi-bin/targets/v5/detail_view.pl?transcript_id=ENST00000290390
hsa-miR-20a-5p	MIMAT0000075	hsa-miR-20a	17.03	0.0009782	ENST00000359484	SLC4A5	http://www.ebi.ac.uk/enright-srv/microcosm/cgi-bin/targets/v5/detail_view.pl?transcript_id=ENST00000359484
hsa-miR-20a-5p	MIMAT0000075	hsa-miR-20a	16.93	0.0009782	ENST00000359484	SLC4A5	http://www.ebi.ac.uk/enright-srv/microcosm/cgi-bin/targets/v5/detail_view.pl?transcript_id=ENST00000359484
hsa-miR-146a-5p	MIMAT0000449	hsa-miR-146a	16.2	0.04	ENST00000361861	Q9HDB3_HUMAN	http://www.ebi.ac.uk/enright-srv/microcosm/cgi-bin/targets/v5/detail_view.pl?transcript_id=ENST00000361861
hsa-miR-20a-5p	MIMAT0000075	hsa-miR-20a	17.43	0.01	ENST00000305799	K0401_HUMAN	http://www.ebi.ac.uk/enright-srv/microcosm/cgi-bin/targets/v5/detail_view.pl?transcript_id=ENST00000305799
hsa-miR-20a-5p	MIMAT0000075	hsa-miR-20a	17.76	0.03	ENST00000348222	DGUOK	http://www.ebi.ac.uk/enright-srv/microcosm/cgi-bin/targets/v5/detail_view.pl?transcript_id=ENST00000348222
hsa-miR-224-5p	MIMAT0000281	hsa-miR-224	16.8	0.00014281	ENST00000272444	DUSP11	http://www.ebi.ac.uk/enright-srv/microcosm/cgi-bin/targets/v5/detail_view.pl?transcript_id=ENST00000272444
hsa-miR-136-3p	MIMAT0004606	hsa-miR-136*	15.61	0.02	ENST00000295136	NP_660343.1	http://www.ebi.ac.uk/enright-srv/microcosm/cgi-bin/targets/v5/detail_view.pl?transcript_id=ENST00000295136
hsa-miR-100-5p	MIMAT0000098	hsa-miR-100	17.39	0.001301	ENST00000258092	EGR4	http://www.ebi.ac.uk/enright-srv/microcosm/cgi-bin/targets/v5/detail_view.pl?transcript_id=ENST00000258092
hsa-miR-100-5p	MIMAT0000098	hsa-miR-100	14.43	0.0035104	ENST00000295133	FBXO41	http://www.ebi.ac.uk/enright-srv/microcosm/cgi-bin/targets/v5/detail_view.pl?transcript_id=ENST00000295133
hsa-miR-224-5p	MIMAT0000281	hsa-miR-224	15.96	0.0030383	ENST00000258083	C2orf7	http://www.ebi.ac.uk/enright-srv/microcosm/cgi-bin/targets/v5/detail_view.pl?transcript_id=ENST00000258083
hsa-miR-196a-3p	MIMAT0004562	hsa-miR-196a*	16.5	0.02	ENST00000389508	RAB11FIP5	http://www.ebi.ac.uk/enright-srv/microcosm/cgi-bin/targets/v5/detail_view.pl?transcript_id=ENST00000389508
hsa-miR-199b-5p	MIMAT0000263	hsa-miR-199b-5p	17.42	0.0013449	ENST00000244204	NAGK	http://www.ebi.ac.uk/enright-srv/microcosm/cgi-bin/targets/v5/detail_view.pl?transcript_id=ENST00000244204
hsa-miR-20a-5p	MIMAT0000075	hsa-miR-20a	17.64	3.6451e-06	ENST00000244204	NAGK	http://www.ebi.ac.uk/enright-srv/microcosm/cgi-bin/targets/v5/detail_view.pl?transcript_id=ENST00000244204
hsa-miR-146a-5p	MIMAT0000449	hsa-miR-146a	15.91	0.0018195	ENST00000272348	SNRPG	http://www.ebi.ac.uk/enright-srv/microcosm/cgi-bin/targets/v5/detail_view.pl?transcript_id=ENST00000272348
hsa-miR-146a-5p	MIMAT0000449	hsa-miR-146a	16.4	0.02	ENST00000244227	SNUT3_HUMAN	http://www.ebi.ac.uk/enright-srv/microcosm/cgi-bin/targets/v5/detail_view.pl?transcript_id=ENST00000244227
hsa-miR-138-1-3p	MIMAT0004607	hsa-miR-138-1*	15.61	0.04	ENST00000330307	Q8WYR5_HUMAN	http://www.ebi.ac.uk/enright-srv/microcosm/cgi-bin/targets/v5/detail_view.pl?transcript_id=ENST00000330307
hsa-miR-136-3p	MIMAT0004606	hsa-miR-136*	14.95	0.0051596	ENST00000377965	PPP3R1	http://www.ebi.ac.uk/enright-srv/microcosm/cgi-bin/targets/v5/detail_view.pl?transcript_id=ENST00000377965
hsa-miR-20a-5p	MIMAT0000075	hsa-miR-20a	16.89	0.0032678	ENST00000377965	PPP3R1	http://www.ebi.ac.uk/enright-srv/microcosm/cgi-bin/targets/v5/detail_view.pl?transcript_id=ENST00000377965
hsa-miR-20a-5p	MIMAT0000075	hsa-miR-20a	16.69	0.0032678	ENST00000377965	PPP3R1	http://www.ebi.ac.uk/enright-srv/microcosm/cgi-bin/targets/v5/detail_view.pl?transcript_id=ENST00000377965
hsa-miR-136-3p	MIMAT0004606	hsa-miR-136*	16.21	0.01	ENST00000356197	Q9HBR8_HUMAN	http://www.ebi.ac.uk/enright-srv/microcosm/cgi-bin/targets/v5/detail_view.pl?transcript_id=ENST00000356197
hsa-miR-146a-5p	MIMAT0000449	hsa-miR-146a	15.58	0.0087527	ENST00000272322	VPS54	http://www.ebi.ac.uk/enright-srv/microcosm/cgi-bin/targets/v5/detail_view.pl?transcript_id=ENST00000272322
hsa-miR-146a-5p	MIMAT0000449	hsa-miR-146a	16.41	0.03	ENST00000337130	UGP2	http://www.ebi.ac.uk/enright-srv/microcosm/cgi-bin/targets/v5/detail_view.pl?transcript_id=ENST00000337130
hsa-miR-224-5p	MIMAT0000281	hsa-miR-224	17.63	0.0010212	ENST00000337130	UGP2	http://www.ebi.ac.uk/enright-srv/microcosm/cgi-bin/targets/v5/detail_view.pl?transcript_id=ENST00000337130
hsa-miR-199b-5p	MIMAT0000263	hsa-miR-199b-5p	16.18	0.0002045	ENST00000282549	OTX1	http://www.ebi.ac.uk/enright-srv/microcosm/cgi-bin/targets/v5/detail_view.pl?transcript_id=ENST00000282549
hsa-miR-20a-5p	MIMAT0000075	hsa-miR-20a	16.92	0.004122	ENST00000335390	TMEM17	http://www.ebi.ac.uk/enright-srv/microcosm/cgi-bin/targets/v5/detail_view.pl?transcript_id=ENST00000335390
hsa-miR-146a-5p	MIMAT0000449	hsa-miR-146a	15.97	0.0075727	ENST00000301998	B3GNT2	http://www.ebi.ac.uk/enright-srv/microcosm/cgi-bin/targets/v5/detail_view.pl?transcript_id=ENST00000301998
hsa-miR-20a-5p	MIMAT0000075	hsa-miR-20a	17.26	4.9546e-05	ENST00000295025	REL	http://www.ebi.ac.uk/enright-srv/microcosm/cgi-bin/targets/v5/detail_view.pl?transcript_id=ENST00000295025
hsa-miR-146a-5p	MIMAT0000449	hsa-miR-146a	15.48	0.0014	ENST00000238714	PAPOLG	http://www.ebi.ac.uk/enright-srv/microcosm/cgi-bin/targets/v5/detail_view.pl?transcript_id=ENST00000238714
hsa-miR-224-5p	MIMAT0000281	hsa-miR-224	15.8	0.01	ENST00000318487	null	http://www.ebi.ac.uk/enright-srv/microcosm/cgi-bin/targets/v5/detail_view.pl?transcript_id=ENST00000318487
hsa-miR-136-3p	MIMAT0004606	hsa-miR-136*	15.19	0.04	ENST00000233741	FANCL	http://www.ebi.ac.uk/enright-srv/microcosm/cgi-bin/targets/v5/detail_view.pl?transcript_id=ENST00000233741
hsa-miR-199b-5p	MIMAT0000263	hsa-miR-199b-5p	15.72	0.0070285	ENST00000339012	CCDC104	http://www.ebi.ac.uk/enright-srv/microcosm/cgi-bin/targets/v5/detail_view.pl?transcript_id=ENST00000339012
hsa-miR-146a-5p	MIMAT0000449	hsa-miR-146a	16.41	0.03	ENST00000295112	null	http://www.ebi.ac.uk/enright-srv/microcosm/cgi-bin/targets/v5/detail_view.pl?transcript_id=ENST00000295112
hsa-miR-100-5p	MIMAT0000098	hsa-miR-100	14.9	0.03	ENST00000317610	RTN4	http://www.ebi.ac.uk/enright-srv/microcosm/cgi-bin/targets/v5/detail_view.pl?transcript_id=ENST00000317610
hsa-miR-100-5p	MIMAT0000098	hsa-miR-100	14.57	0.04	ENST00000356458	Q6ZMW3_HUMAN	http://www.ebi.ac.uk/enright-srv/microcosm/cgi-bin/targets/v5/detail_view.pl?transcript_id=ENST00000356458
hsa-miR-199b-5p	MIMAT0000263	hsa-miR-199b-5p	15.85	0.0065219	ENST00000317802	TSPYL6	http://www.ebi.ac.uk/enright-srv/microcosm/cgi-bin/targets/v5/detail_view.pl?transcript_id=ENST00000317802
hsa-miR-146a-5p	MIMAT0000449	hsa-miR-146a	15.42	0.01	ENST00000378236	C2orf30	http://www.ebi.ac.uk/enright-srv/microcosm/cgi-bin/targets/v5/detail_view.pl?transcript_id=ENST00000378236
hsa-miR-146a-5p	MIMAT0000449	hsa-miR-146a	16.04	0.02	ENST00000295304	CHAC2	http://www.ebi.ac.uk/enright-srv/microcosm/cgi-bin/targets/v5/detail_view.pl?transcript_id=ENST00000295304
hsa-miR-199b-5p	MIMAT0000263	hsa-miR-199b-5p	17.01	0.0051314	ENST00000295304	CHAC2	http://www.ebi.ac.uk/enright-srv/microcosm/cgi-bin/targets/v5/detail_view.pl?transcript_id=ENST00000295304
hsa-miR-100-5p	MIMAT0000098	hsa-miR-100	15.6	0.01	ENST00000281394	CCDC128	http://www.ebi.ac.uk/enright-srv/microcosm/cgi-bin/targets/v5/detail_view.pl?transcript_id=ENST00000281394
hsa-miR-20a-5p	MIMAT0000075	hsa-miR-20a	16.96	0.02	ENST00000327876	KCNK12	http://www.ebi.ac.uk/enright-srv/microcosm/cgi-bin/targets/v5/detail_view.pl?transcript_id=ENST00000327876
hsa-miR-224-5p	MIMAT0000281	hsa-miR-224	15.8	0.02	ENST00000263735	TACSTD1	http://www.ebi.ac.uk/enright-srv/microcosm/cgi-bin/targets/v5/detail_view.pl?transcript_id=ENST00000263735
hsa-miR-20a-5p	MIMAT0000075	hsa-miR-20a	17.41	0.04	ENST00000238892	CRIPT	http://www.ebi.ac.uk/enright-srv/microcosm/cgi-bin/targets/v5/detail_view.pl?transcript_id=ENST00000238892
hsa-miR-100-5p	MIMAT0000098	hsa-miR-100	14.6	0.00066328	ENST00000343465	null	http://www.ebi.ac.uk/enright-srv/microcosm/cgi-bin/targets/v5/detail_view.pl?transcript_id=ENST00000343465
hsa-miR-146a-5p	MIMAT0000449	hsa-miR-146a	15.8	0.0050307	ENST00000343465	null	http://www.ebi.ac.uk/enright-srv/microcosm/cgi-bin/targets/v5/detail_view.pl?transcript_id=ENST00000343465
hsa-miR-136-3p	MIMAT0004606	hsa-miR-136*	15.8	0.02	ENST00000378479	Q6UXP8_HUMAN	http://www.ebi.ac.uk/enright-srv/microcosm/cgi-bin/targets/v5/detail_view.pl?transcript_id=ENST00000378479
hsa-miR-224-5p	MIMAT0000281	hsa-miR-224	16.24	0.04	ENST00000303077	SIX2	http://www.ebi.ac.uk/enright-srv/microcosm/cgi-bin/targets/v5/detail_view.pl?transcript_id=ENST00000303077
hsa-miR-138-1-3p	MIMAT0004607	hsa-miR-138-1*	15.45	0.0033429	ENST00000303077	SIX2	http://www.ebi.ac.uk/enright-srv/microcosm/cgi-bin/targets/v5/detail_view.pl?transcript_id=ENST00000303077
hsa-miR-138-1-3p	MIMAT0004607	hsa-miR-138-1*	14.94	0.0033429	ENST00000303077	SIX2	http://www.ebi.ac.uk/enright-srv/microcosm/cgi-bin/targets/v5/detail_view.pl?transcript_id=ENST00000303077
hsa-miR-224-5p	MIMAT0000281	hsa-miR-224	16.18	0.0044281	ENST00000378481	SIX2	http://www.ebi.ac.uk/enright-srv/microcosm/cgi-bin/targets/v5/detail_view.pl?transcript_id=ENST00000378481
hsa-miR-199b-5p	MIMAT0000263	hsa-miR-199b-5p	15.83	0.00075441	ENST00000378481	SIX2	http://www.ebi.ac.uk/enright-srv/microcosm/cgi-bin/targets/v5/detail_view.pl?transcript_id=ENST00000378481
hsa-miR-138-1-3p	MIMAT0004607	hsa-miR-138-1*	15.39	0.0037173	ENST00000378481	SIX2	http://www.ebi.ac.uk/enright-srv/microcosm/cgi-bin/targets/v5/detail_view.pl?transcript_id=ENST00000378481
hsa-miR-138-1-3p	MIMAT0004607	hsa-miR-138-1*	14.88	0.0037173	ENST00000378481	SIX2	http://www.ebi.ac.uk/enright-srv/microcosm/cgi-bin/targets/v5/detail_view.pl?transcript_id=ENST00000378481
hsa-miR-199b-5p	MIMAT0000263	hsa-miR-199b-5p	16.66	0.02	ENST00000260653	SIX3	http://www.ebi.ac.uk/enright-srv/microcosm/cgi-bin/targets/v5/detail_view.pl?transcript_id=ENST00000260653
hsa-miR-224-5p	MIMAT0000281	hsa-miR-224	16.33	0.0079527	ENST00000378494	C2orf34	http://www.ebi.ac.uk/enright-srv/microcosm/cgi-bin/targets/v5/detail_view.pl?transcript_id=ENST00000378494
hsa-miR-199b-5p	MIMAT0000263	hsa-miR-199b-5p	17.64	0.01	ENST00000260649	SLC3A1	http://www.ebi.ac.uk/enright-srv/microcosm/cgi-bin/targets/v5/detail_view.pl?transcript_id=ENST00000260649
hsa-miR-199b-5p	MIMAT0000263	hsa-miR-199b-5p	16.1	0.00013035	ENST00000378520	SLC3A1	http://www.ebi.ac.uk/enright-srv/microcosm/cgi-bin/targets/v5/detail_view.pl?transcript_id=ENST00000378520
hsa-miR-199b-5p	MIMAT0000263	hsa-miR-199b-5p	15.79	0.00013035	ENST00000378520	SLC3A1	http://www.ebi.ac.uk/enright-srv/microcosm/cgi-bin/targets/v5/detail_view.pl?transcript_id=ENST00000378520
hsa-miR-224-5p	MIMAT0000281	hsa-miR-224	16.1	0.04	ENST00000260645	ABCG5	http://www.ebi.ac.uk/enright-srv/microcosm/cgi-bin/targets/v5/detail_view.pl?transcript_id=ENST00000260645
hsa-miR-196a-3p	MIMAT0004562	hsa-miR-196a*	16.25	0.03	ENST00000330811	DYNC2LI1	http://www.ebi.ac.uk/enright-srv/microcosm/cgi-bin/targets/v5/detail_view.pl?transcript_id=ENST00000330811
hsa-miR-138-1-3p	MIMAT0004607	hsa-miR-138-1*	16.03	0.02	ENST00000378650	ZFP36L2	http://www.ebi.ac.uk/enright-srv/microcosm/cgi-bin/targets/v5/detail_view.pl?transcript_id=ENST00000378650
hsa-miR-224-5p	MIMAT0000281	hsa-miR-224	15.4	0.01	ENST00000294964	SG493_HUMAN	http://www.ebi.ac.uk/enright-srv/microcosm/cgi-bin/targets/v5/detail_view.pl?transcript_id=ENST00000294964
hsa-miR-196a-3p	MIMAT0004562	hsa-miR-196a*	16.29	0.03	ENST00000332839	SLC8A1	http://www.ebi.ac.uk/enright-srv/microcosm/cgi-bin/targets/v5/detail_view.pl?transcript_id=ENST00000332839
hsa-miR-196a-3p	MIMAT0004562	hsa-miR-196a*	15.97	0.04	ENST00000281961	TMEM178	http://www.ebi.ac.uk/enright-srv/microcosm/cgi-bin/targets/v5/detail_view.pl?transcript_id=ENST00000281961
hsa-miR-196a-3p	MIMAT0004562	hsa-miR-196a*	15.97	0.04	ENST00000378744	TMEM178	http://www.ebi.ac.uk/enright-srv/microcosm/cgi-bin/targets/v5/detail_view.pl?transcript_id=ENST00000378744
hsa-miR-196a-3p	MIMAT0004562	hsa-miR-196a*	16.23	0.03	ENST00000263879	SOS1	http://www.ebi.ac.uk/enright-srv/microcosm/cgi-bin/targets/v5/detail_view.pl?transcript_id=ENST00000263879
hsa-miR-100-5p	MIMAT0000098	hsa-miR-100	14.78	0.002812	ENST00000378851	GEMIN6	http://www.ebi.ac.uk/enright-srv/microcosm/cgi-bin/targets/v5/detail_view.pl?transcript_id=ENST00000378851
hsa-miR-100-5p	MIMAT0000098	hsa-miR-100	14.14	0.002812	ENST00000378851	GEMIN6	http://www.ebi.ac.uk/enright-srv/microcosm/cgi-bin/targets/v5/detail_view.pl?transcript_id=ENST00000378851
hsa-miR-20a-5p	MIMAT0000075	hsa-miR-20a	16.58	0.03	ENST00000378903	GALM	http://www.ebi.ac.uk/enright-srv/microcosm/cgi-bin/targets/v5/detail_view.pl?transcript_id=ENST00000378903
hsa-miR-196a-3p	MIMAT0004562	hsa-miR-196a*	17.73	0.0089897	ENST00000272249	HNRPLL	http://www.ebi.ac.uk/enright-srv/microcosm/cgi-bin/targets/v5/detail_view.pl?transcript_id=ENST00000272249
hsa-miR-100-5p	MIMAT0000098	hsa-miR-100	15.26	0.02	ENST00000379035	CDC42EP3	http://www.ebi.ac.uk/enright-srv/microcosm/cgi-bin/targets/v5/detail_view.pl?transcript_id=ENST00000379035
hsa-miR-100-5p	MIMAT0000098	hsa-miR-100	14.07	0.0071317	ENST00000295324	CDC42EP3	http://www.ebi.ac.uk/enright-srv/microcosm/cgi-bin/targets/v5/detail_view.pl?transcript_id=ENST00000295324
hsa-miR-136-3p	MIMAT0004606	hsa-miR-136*	14.52	0.0072967	ENST00000379043	QPCT	http://www.ebi.ac.uk/enright-srv/microcosm/cgi-bin/targets/v5/detail_view.pl?transcript_id=ENST00000379043
hsa-miR-20a-5p	MIMAT0000075	hsa-miR-20a	17.71	0.03	ENST00000379092	NP_653337.1	http://www.ebi.ac.uk/enright-srv/microcosm/cgi-bin/targets/v5/detail_view.pl?transcript_id=ENST00000379092
hsa-miR-20a-5p	MIMAT0000075	hsa-miR-20a	17.72	0.004717	ENST00000002125	NP_653337.1	http://www.ebi.ac.uk/enright-srv/microcosm/cgi-bin/targets/v5/detail_view.pl?transcript_id=ENST00000002125
hsa-miR-146a-5p	MIMAT0000449	hsa-miR-146a	16.07	0.0019751	ENST00000233057	EIF2AK2	http://www.ebi.ac.uk/enright-srv/microcosm/cgi-bin/targets/v5/detail_view.pl?transcript_id=ENST00000233057
hsa-miR-100-5p	MIMAT0000098	hsa-miR-100	15.13	0.02	ENST00000233099	HEATR5B	http://www.ebi.ac.uk/enright-srv/microcosm/cgi-bin/targets/v5/detail_view.pl?transcript_id=ENST00000233099
hsa-miR-196a-3p	MIMAT0004562	hsa-miR-196a*	15.09	0.01	ENST00000379242	VIT	http://www.ebi.ac.uk/enright-srv/microcosm/cgi-bin/targets/v5/detail_view.pl?transcript_id=ENST00000379242
hsa-miR-100-5p	MIMAT0000098	hsa-miR-100	16.04	0.01	ENST00000295055	CAPN13	http://www.ebi.ac.uk/enright-srv/microcosm/cgi-bin/targets/v5/detail_view.pl?transcript_id=ENST00000295055
hsa-miR-20a-5p	MIMAT0000075	hsa-miR-20a	17.35	0.0048775	ENST00000295055	CAPN13	http://www.ebi.ac.uk/enright-srv/microcosm/cgi-bin/targets/v5/detail_view.pl?transcript_id=ENST00000295055
hsa-miR-138-1-3p	MIMAT0004607	hsa-miR-138-1*	17.51	0.0037656	ENST00000379558	NP_954974.2	http://www.ebi.ac.uk/enright-srv/microcosm/cgi-bin/targets/v5/detail_view.pl?transcript_id=ENST00000379558
hsa-miR-138-1-3p	MIMAT0004607	hsa-miR-138-1*	17.51	0.0037656	ENST00000379560	NP_954974.2	http://www.ebi.ac.uk/enright-srv/microcosm/cgi-bin/targets/v5/detail_view.pl?transcript_id=ENST00000379560
hsa-miR-146a-5p	MIMAT0000449	hsa-miR-146a	16.53	0.03	ENST00000306108	NP_060380.2	http://www.ebi.ac.uk/enright-srv/microcosm/cgi-bin/targets/v5/detail_view.pl?transcript_id=ENST00000306108
hsa-miR-136-3p	MIMAT0004606	hsa-miR-136*	15.53	0.03	ENST00000306108	NP_060380.2	http://www.ebi.ac.uk/enright-srv/microcosm/cgi-bin/targets/v5/detail_view.pl?transcript_id=ENST00000306108
hsa-miR-146a-5p	MIMAT0000449	hsa-miR-146a	16.5	0.02	ENST00000379566	NP_060380.2	http://www.ebi.ac.uk/enright-srv/microcosm/cgi-bin/targets/v5/detail_view.pl?transcript_id=ENST00000379566
hsa-miR-136-3p	MIMAT0004606	hsa-miR-136*	15.51	0.03	ENST00000379566	NP_060380.2	http://www.ebi.ac.uk/enright-srv/microcosm/cgi-bin/targets/v5/detail_view.pl?transcript_id=ENST00000379566
hsa-miR-20a-5p	MIMAT0000075	hsa-miR-20a	17.08	0.04	ENST00000379566	NP_060380.2	http://www.ebi.ac.uk/enright-srv/microcosm/cgi-bin/targets/v5/detail_view.pl?transcript_id=ENST00000379566
hsa-miR-138-1-3p	MIMAT0004607	hsa-miR-138-1*	15.57	0.04	ENST00000379624	BRE	http://www.ebi.ac.uk/enright-srv/microcosm/cgi-bin/targets/v5/detail_view.pl?transcript_id=ENST00000379624
hsa-miR-138-1-3p	MIMAT0004607	hsa-miR-138-1*	15.59	0.04	ENST00000342045	BRE	http://www.ebi.ac.uk/enright-srv/microcosm/cgi-bin/targets/v5/detail_view.pl?transcript_id=ENST00000342045
hsa-miR-136-3p	MIMAT0004606	hsa-miR-136*	19.32	0.00069758	ENST00000302188	RBKS	http://www.ebi.ac.uk/enright-srv/microcosm/cgi-bin/targets/v5/detail_view.pl?transcript_id=ENST00000302188
hsa-miR-136-3p	MIMAT0004606	hsa-miR-136*	19.32	0.00069758	ENST00000379657	RBKS	http://www.ebi.ac.uk/enright-srv/microcosm/cgi-bin/targets/v5/detail_view.pl?transcript_id=ENST00000379657
hsa-miR-146a-5p	MIMAT0000449	hsa-miR-146a	16.25	0.04	ENST00000379666	MRPL33	http://www.ebi.ac.uk/enright-srv/microcosm/cgi-bin/targets/v5/detail_view.pl?transcript_id=ENST00000379666
hsa-miR-224-5p	MIMAT0000281	hsa-miR-224	16.8	0.02	ENST00000379666	MRPL33	http://www.ebi.ac.uk/enright-srv/microcosm/cgi-bin/targets/v5/detail_view.pl?transcript_id=ENST00000379666
hsa-miR-146a-5p	MIMAT0000449	hsa-miR-146a	16.25	0.04	ENST00000296102	MRPL33	http://www.ebi.ac.uk/enright-srv/microcosm/cgi-bin/targets/v5/detail_view.pl?transcript_id=ENST00000296102
hsa-miR-224-5p	MIMAT0000281	hsa-miR-224	16.8	0.02	ENST00000296102	MRPL33	http://www.ebi.ac.uk/enright-srv/microcosm/cgi-bin/targets/v5/detail_view.pl?transcript_id=ENST00000296102
hsa-miR-146a-5p	MIMAT0000449	hsa-miR-146a	16.25	0.04	ENST00000359603	MRPL33	http://www.ebi.ac.uk/enright-srv/microcosm/cgi-bin/targets/v5/detail_view.pl?transcript_id=ENST00000359603
hsa-miR-224-5p	MIMAT0000281	hsa-miR-224	16.8	0.00025325	ENST00000359603	MRPL33	http://www.ebi.ac.uk/enright-srv/microcosm/cgi-bin/targets/v5/detail_view.pl?transcript_id=ENST00000359603
hsa-miR-20a-5p	MIMAT0000075	hsa-miR-20a	17.49	0.04	ENST00000379677	Q6ZVL0_HUMAN	http://www.ebi.ac.uk/enright-srv/microcosm/cgi-bin/targets/v5/detail_view.pl?transcript_id=ENST00000379677
hsa-miR-224-5p	MIMAT0000281	hsa-miR-224	15.66	0.01	ENST00000326019	SLC4A1AP	http://www.ebi.ac.uk/enright-srv/microcosm/cgi-bin/targets/v5/detail_view.pl?transcript_id=ENST00000326019
hsa-miR-146a-5p	MIMAT0000449	hsa-miR-146a	15.93	0.0021988	ENST00000337768	SUPT7L	http://www.ebi.ac.uk/enright-srv/microcosm/cgi-bin/targets/v5/detail_view.pl?transcript_id=ENST00000337768
hsa-miR-224-5p	MIMAT0000281	hsa-miR-224	15.35	0.03	ENST00000337768	SUPT7L	http://www.ebi.ac.uk/enright-srv/microcosm/cgi-bin/targets/v5/detail_view.pl?transcript_id=ENST00000337768
hsa-miR-224-5p	MIMAT0000281	hsa-miR-224	17.55	0.01	ENST00000264718	XAB1	http://www.ebi.ac.uk/enright-srv/microcosm/cgi-bin/targets/v5/detail_view.pl?transcript_id=ENST00000264718
hsa-miR-224-5p	MIMAT0000281	hsa-miR-224	16.33	0.00064545	ENST00000379691	XAB1	http://www.ebi.ac.uk/enright-srv/microcosm/cgi-bin/targets/v5/detail_view.pl?transcript_id=ENST00000379691
hsa-miR-146a-5p	MIMAT0000449	hsa-miR-146a	16.37	0.00059912	ENST00000264717	GCKR	http://www.ebi.ac.uk/enright-srv/microcosm/cgi-bin/targets/v5/detail_view.pl?transcript_id=ENST00000264717
hsa-miR-138-1-3p	MIMAT0004607	hsa-miR-138-1*	15.5	0.04	ENST00000264703	FNDC4	http://www.ebi.ac.uk/enright-srv/microcosm/cgi-bin/targets/v5/detail_view.pl?transcript_id=ENST00000264703
hsa-miR-138-1-3p	MIMAT0004607	hsa-miR-138-1*	15.5	0.04	ENST00000379745	FNDC4	http://www.ebi.ac.uk/enright-srv/microcosm/cgi-bin/targets/v5/detail_view.pl?transcript_id=ENST00000379745
hsa-miR-20a-5p	MIMAT0000075	hsa-miR-20a	17.1	0.00080754	ENST00000379863	NRBP1	http://www.ebi.ac.uk/enright-srv/microcosm/cgi-bin/targets/v5/detail_view.pl?transcript_id=ENST00000379863
hsa-miR-224-5p	MIMAT0000281	hsa-miR-224	15.47	0.03	ENST00000344034	PPM1G	http://www.ebi.ac.uk/enright-srv/microcosm/cgi-bin/targets/v5/detail_view.pl?transcript_id=ENST00000344034
hsa-miR-100-5p	MIMAT0000098	hsa-miR-100	14.21	0.00019652	ENST00000296099	UCN	http://www.ebi.ac.uk/enright-srv/microcosm/cgi-bin/targets/v5/detail_view.pl?transcript_id=ENST00000296099
hsa-miR-100-5p	MIMAT0000098	hsa-miR-100	14.21	0.00033451	ENST00000380093	CAD	http://www.ebi.ac.uk/enright-srv/microcosm/cgi-bin/targets/v5/detail_view.pl?transcript_id=ENST00000380093
hsa-miR-199b-5p	MIMAT0000263	hsa-miR-199b-5p	15.49	0.03	ENST00000380093	CAD	http://www.ebi.ac.uk/enright-srv/microcosm/cgi-bin/targets/v5/detail_view.pl?transcript_id=ENST00000380093
hsa-miR-196a-3p	MIMAT0004562	hsa-miR-196a*	16.71	0.02	ENST00000340182	C2orf28	http://www.ebi.ac.uk/enright-srv/microcosm/cgi-bin/targets/v5/detail_view.pl?transcript_id=ENST00000340182
hsa-miR-196a-3p	MIMAT0004562	hsa-miR-196a*	16.71	0.02	ENST00000380171	C2orf28	http://www.ebi.ac.uk/enright-srv/microcosm/cgi-bin/targets/v5/detail_view.pl?transcript_id=ENST00000380171
hsa-miR-199b-5p	MIMAT0000263	hsa-miR-199b-5p	15.68	0.0017181	ENST00000380245	PREB	http://www.ebi.ac.uk/enright-srv/microcosm/cgi-bin/targets/v5/detail_view.pl?transcript_id=ENST00000380245
hsa-miR-199b-5p	MIMAT0000263	hsa-miR-199b-5p	16.94	0.0032498	ENST00000360131	AGBL5	http://www.ebi.ac.uk/enright-srv/microcosm/cgi-bin/targets/v5/detail_view.pl?transcript_id=ENST00000360131
hsa-miR-20a-5p	MIMAT0000075	hsa-miR-20a	17.04	4.6528e-06	ENST00000380426	DPYSL5	http://www.ebi.ac.uk/enright-srv/microcosm/cgi-bin/targets/v5/detail_view.pl?transcript_id=ENST00000380426
hsa-miR-20a-5p	MIMAT0000075	hsa-miR-20a	16.94	4.6528e-06	ENST00000380426	DPYSL5	http://www.ebi.ac.uk/enright-srv/microcosm/cgi-bin/targets/v5/detail_view.pl?transcript_id=ENST00000380426
hsa-miR-138-1-3p	MIMAT0004607	hsa-miR-138-1*	15.46	0.04	ENST00000288861	NP_001025052.1	http://www.ebi.ac.uk/enright-srv/microcosm/cgi-bin/targets/v5/detail_view.pl?transcript_id=ENST00000288861
hsa-miR-199b-5p	MIMAT0000263	hsa-miR-199b-5p	16.42	0.03	ENST00000389697	SELI_HUMAN	http://www.ebi.ac.uk/enright-srv/microcosm/cgi-bin/targets/v5/detail_view.pl?transcript_id=ENST00000389697
hsa-miR-199b-5p	MIMAT0000263	hsa-miR-199b-5p	17.3	0.01	ENST00000333478	GPR113	http://www.ebi.ac.uk/enright-srv/microcosm/cgi-bin/targets/v5/detail_view.pl?transcript_id=ENST00000333478
hsa-miR-146a-5p	MIMAT0000449	hsa-miR-146a	16.29	0.04	ENST00000317799	HADHB	http://www.ebi.ac.uk/enright-srv/microcosm/cgi-bin/targets/v5/detail_view.pl?transcript_id=ENST00000317799
hsa-miR-146a-5p	MIMAT0000449	hsa-miR-146a	16.28	0.04	ENST00000317815	HADHB	http://www.ebi.ac.uk/enright-srv/microcosm/cgi-bin/targets/v5/detail_view.pl?transcript_id=ENST00000317815
hsa-miR-199b-5p	MIMAT0000263	hsa-miR-199b-5p	15.69	0.0057677	ENST00000380649	HADHA	http://www.ebi.ac.uk/enright-srv/microcosm/cgi-bin/targets/v5/detail_view.pl?transcript_id=ENST00000380649
hsa-miR-199b-5p	MIMAT0000263	hsa-miR-199b-5p	16.28	0.04	ENST00000264710	RAB10	http://www.ebi.ac.uk/enright-srv/microcosm/cgi-bin/targets/v5/detail_view.pl?transcript_id=ENST00000264710
hsa-miR-199b-5p	MIMAT0000263	hsa-miR-199b-5p	16.28	0.0024744	ENST00000380687	RAB10	http://www.ebi.ac.uk/enright-srv/microcosm/cgi-bin/targets/v5/detail_view.pl?transcript_id=ENST00000380687
hsa-miR-20a-5p	MIMAT0000075	hsa-miR-20a	16.45	0.00013726	ENST00000334503	KIAA0953	http://www.ebi.ac.uk/enright-srv/microcosm/cgi-bin/targets/v5/detail_view.pl?transcript_id=ENST00000334503
hsa-miR-146a-5p	MIMAT0000449	hsa-miR-146a	15.5	0.0038503	ENST00000295150	NP_001035800.1	http://www.ebi.ac.uk/enright-srv/microcosm/cgi-bin/targets/v5/detail_view.pl?transcript_id=ENST00000295150
hsa-miR-224-5p	MIMAT0000281	hsa-miR-224	15.66	0.04	ENST00000380965	PM14_HUMAN	http://www.ebi.ac.uk/enright-srv/microcosm/cgi-bin/targets/v5/detail_view.pl?transcript_id=ENST00000380965
hsa-miR-138-1-3p	MIMAT0004607	hsa-miR-138-1*	16.82	0.01	ENST00000309009	null	http://www.ebi.ac.uk/enright-srv/microcosm/cgi-bin/targets/v5/detail_view.pl?transcript_id=ENST00000309009
hsa-miR-20a-5p	MIMAT0000075	hsa-miR-20a	17.47	0.04	ENST00000381016	UBXD4	http://www.ebi.ac.uk/enright-srv/microcosm/cgi-bin/targets/v5/detail_view.pl?transcript_id=ENST00000381016
hsa-miR-20a-5p	MIMAT0000075	hsa-miR-20a	17.47	0.00057039	ENST00000309033	UBXD4	http://www.ebi.ac.uk/enright-srv/microcosm/cgi-bin/targets/v5/detail_view.pl?transcript_id=ENST00000309033
hsa-miR-136-3p	MIMAT0004606	hsa-miR-136*	15.1	0.04	ENST00000317039	Q9UHZ5_HUMAN	http://www.ebi.ac.uk/enright-srv/microcosm/cgi-bin/targets/v5/detail_view.pl?transcript_id=ENST00000317039
hsa-miR-224-5p	MIMAT0000281	hsa-miR-224	16.16	0.04	ENST00000175091	LAPTM4A	http://www.ebi.ac.uk/enright-srv/microcosm/cgi-bin/targets/v5/detail_view.pl?transcript_id=ENST00000175091
hsa-miR-136-3p	MIMAT0004606	hsa-miR-136*	15.11	0.04	ENST00000175091	LAPTM4A	http://www.ebi.ac.uk/enright-srv/microcosm/cgi-bin/targets/v5/detail_view.pl?transcript_id=ENST00000175091
hsa-miR-20a-5p	MIMAT0000075	hsa-miR-20a	17.71	0.03	ENST00000175091	LAPTM4A	http://www.ebi.ac.uk/enright-srv/microcosm/cgi-bin/targets/v5/detail_view.pl?transcript_id=ENST00000175091
hsa-miR-224-5p	MIMAT0000281	hsa-miR-224	16.15	0.04	ENST00000381167	LAPTM4A	http://www.ebi.ac.uk/enright-srv/microcosm/cgi-bin/targets/v5/detail_view.pl?transcript_id=ENST00000381167
hsa-miR-136-3p	MIMAT0004606	hsa-miR-136*	15.11	0.02	ENST00000381167	LAPTM4A	http://www.ebi.ac.uk/enright-srv/microcosm/cgi-bin/targets/v5/detail_view.pl?transcript_id=ENST00000381167
hsa-miR-20a-5p	MIMAT0000075	hsa-miR-20a	17.7	0.0008726	ENST00000381167	LAPTM4A	http://www.ebi.ac.uk/enright-srv/microcosm/cgi-bin/targets/v5/detail_view.pl?transcript_id=ENST00000381167
hsa-miR-20a-5p	MIMAT0000075	hsa-miR-20a	16.85	4.9233e-06	ENST00000381236	OSR1	http://www.ebi.ac.uk/enright-srv/microcosm/cgi-bin/targets/v5/detail_view.pl?transcript_id=ENST00000381236
hsa-miR-146a-5p	MIMAT0000449	hsa-miR-146a	15.69	0.01	ENST00000317402	NP_872431.2	http://www.ebi.ac.uk/enright-srv/microcosm/cgi-bin/targets/v5/detail_view.pl?transcript_id=ENST00000317402
hsa-miR-20a-5p	MIMAT0000075	hsa-miR-20a	16.7	0.00071949	ENST00000281043	MYCN	http://www.ebi.ac.uk/enright-srv/microcosm/cgi-bin/targets/v5/detail_view.pl?transcript_id=ENST00000281043
hsa-miR-136-3p	MIMAT0004606	hsa-miR-136*	16.14	0.01	ENST00000381383	NP_056993.2	http://www.ebi.ac.uk/enright-srv/microcosm/cgi-bin/targets/v5/detail_view.pl?transcript_id=ENST00000381383
hsa-miR-136-3p	MIMAT0004606	hsa-miR-136*	16.14	0.01	ENST00000281513	NP_056993.2	http://www.ebi.ac.uk/enright-srv/microcosm/cgi-bin/targets/v5/detail_view.pl?transcript_id=ENST00000281513
hsa-miR-100-5p	MIMAT0000098	hsa-miR-100	14.5	0.02	ENST00000359969	FAM84A	http://www.ebi.ac.uk/enright-srv/microcosm/cgi-bin/targets/v5/detail_view.pl?transcript_id=ENST00000359969
hsa-miR-199b-5p	MIMAT0000263	hsa-miR-199b-5p	17.92	0.00014396	ENST00000359969	FAM84A	http://www.ebi.ac.uk/enright-srv/microcosm/cgi-bin/targets/v5/detail_view.pl?transcript_id=ENST00000359969
hsa-miR-199b-5p	MIMAT0000263	hsa-miR-199b-5p	17.27	0.01	ENST00000381444	FAM84A	http://www.ebi.ac.uk/enright-srv/microcosm/cgi-bin/targets/v5/detail_view.pl?transcript_id=ENST00000381444
hsa-miR-199b-5p	MIMAT0000263	hsa-miR-199b-5p	17.26	0.01	ENST00000295092	FAM84A	http://www.ebi.ac.uk/enright-srv/microcosm/cgi-bin/targets/v5/detail_view.pl?transcript_id=ENST00000295092
hsa-miR-199b-5p	MIMAT0000263	hsa-miR-199b-5p	16.52	0.03	ENST00000381456	FAM84A	http://www.ebi.ac.uk/enright-srv/microcosm/cgi-bin/targets/v5/detail_view.pl?transcript_id=ENST00000381456
hsa-miR-100-5p	MIMAT0000098	hsa-miR-100	14.41	0.00025942	ENST00000381465	TRIB2	http://www.ebi.ac.uk/enright-srv/microcosm/cgi-bin/targets/v5/detail_view.pl?transcript_id=ENST00000381465
hsa-miR-196a-3p	MIMAT0004562	hsa-miR-196a*	16.37	0.03	ENST00000306928	NTSR2	http://www.ebi.ac.uk/enright-srv/microcosm/cgi-bin/targets/v5/detail_view.pl?transcript_id=ENST00000306928
hsa-miR-138-1-3p	MIMAT0004607	hsa-miR-138-1*	15.43	0.0012511	ENST00000307236	E2F6	http://www.ebi.ac.uk/enright-srv/microcosm/cgi-bin/targets/v5/detail_view.pl?transcript_id=ENST00000307236
hsa-miR-196a-3p	MIMAT0004562	hsa-miR-196a*	16.52	0.02	ENST00000295082	KCNF1	http://www.ebi.ac.uk/enright-srv/microcosm/cgi-bin/targets/v5/detail_view.pl?transcript_id=ENST00000295082
hsa-miR-196a-3p	MIMAT0004562	hsa-miR-196a*	16.51	0.02	ENST00000381593	KCNF1	http://www.ebi.ac.uk/enright-srv/microcosm/cgi-bin/targets/v5/detail_view.pl?transcript_id=ENST00000381593
hsa-miR-138-1-3p	MIMAT0004607	hsa-miR-138-1*	16.01	0.02	ENST00000381598	PDIA6	http://www.ebi.ac.uk/enright-srv/microcosm/cgi-bin/targets/v5/detail_view.pl?transcript_id=ENST00000381598
hsa-miR-146a-5p	MIMAT0000449	hsa-miR-146a	16.22	0.04	ENST00000272238	ATP6V1C2	http://www.ebi.ac.uk/enright-srv/microcosm/cgi-bin/targets/v5/detail_view.pl?transcript_id=ENST00000272238
hsa-miR-146a-5p	MIMAT0000449	hsa-miR-146a	16.21	0.003673	ENST00000381661	ATP6V1C2	http://www.ebi.ac.uk/enright-srv/microcosm/cgi-bin/targets/v5/detail_view.pl?transcript_id=ENST00000381661
hsa-miR-138-1-3p	MIMAT0004607	hsa-miR-138-1*	15.57	0.04	ENST00000263836	NOL10	http://www.ebi.ac.uk/enright-srv/microcosm/cgi-bin/targets/v5/detail_view.pl?transcript_id=ENST00000263836
hsa-miR-138-1-3p	MIMAT0004607	hsa-miR-138-1*	15.56	0.04	ENST00000295132	NOL10	http://www.ebi.ac.uk/enright-srv/microcosm/cgi-bin/targets/v5/detail_view.pl?transcript_id=ENST00000295132
hsa-miR-100-5p	MIMAT0000098	hsa-miR-100	14.61	0.04	ENST00000234111	ODC1	http://www.ebi.ac.uk/enright-srv/microcosm/cgi-bin/targets/v5/detail_view.pl?transcript_id=ENST00000234111
hsa-miR-136-3p	MIMAT0004606	hsa-miR-136*	15.01	0.04	ENST00000340444	NM_207480	http://www.ebi.ac.uk/enright-srv/microcosm/cgi-bin/targets/v5/detail_view.pl?transcript_id=ENST00000340444
hsa-miR-100-5p	MIMAT0000098	hsa-miR-100	14.21	0.000556	ENST00000324907	GRHL1	http://www.ebi.ac.uk/enright-srv/microcosm/cgi-bin/targets/v5/detail_view.pl?transcript_id=ENST00000324907
hsa-miR-224-5p	MIMAT0000281	hsa-miR-224	16.85	0.02	ENST00000355346	ITGB1BP1	http://www.ebi.ac.uk/enright-srv/microcosm/cgi-bin/targets/v5/detail_view.pl?transcript_id=ENST00000355346
hsa-miR-224-5p	MIMAT0000281	hsa-miR-224	16.81	0.00051577	ENST00000360635	ITGB1BP1	http://www.ebi.ac.uk/enright-srv/microcosm/cgi-bin/targets/v5/detail_view.pl?transcript_id=ENST00000360635
hsa-miR-224-5p	MIMAT0000281	hsa-miR-224	17.6	0.00019716	ENST00000252505	ALLC	http://www.ebi.ac.uk/enright-srv/microcosm/cgi-bin/targets/v5/detail_view.pl?transcript_id=ENST00000252505
hsa-miR-224-5p	MIMAT0000281	hsa-miR-224	15.41	0.03	ENST00000315212	RNASEH1	http://www.ebi.ac.uk/enright-srv/microcosm/cgi-bin/targets/v5/detail_view.pl?transcript_id=ENST00000315212
hsa-miR-100-5p	MIMAT0000098	hsa-miR-100	14.73	0.04	ENST00000382125	TSSC1	http://www.ebi.ac.uk/enright-srv/microcosm/cgi-bin/targets/v5/detail_view.pl?transcript_id=ENST00000382125
hsa-miR-146a-5p	MIMAT0000449	hsa-miR-146a	15.4	0.0045702	ENST00000382125	TSSC1	http://www.ebi.ac.uk/enright-srv/microcosm/cgi-bin/targets/v5/detail_view.pl?transcript_id=ENST00000382125
hsa-miR-100-5p	MIMAT0000098	hsa-miR-100	14.66	0.03	ENST00000263884	TSSC1	http://www.ebi.ac.uk/enright-srv/microcosm/cgi-bin/targets/v5/detail_view.pl?transcript_id=ENST00000263884
hsa-miR-138-1-3p	MIMAT0004607	hsa-miR-138-1*	15.8	0.03	ENST00000382170	null	http://www.ebi.ac.uk/enright-srv/microcosm/cgi-bin/targets/v5/detail_view.pl?transcript_id=ENST00000382170
hsa-miR-199b-5p	MIMAT0000263	hsa-miR-199b-5p	16.17	0.04	ENST00000382206	TPO	http://www.ebi.ac.uk/enright-srv/microcosm/cgi-bin/targets/v5/detail_view.pl?transcript_id=ENST00000382206
hsa-miR-199b-5p	MIMAT0000263	hsa-miR-199b-5p	16.17	0.04	ENST00000329066	TPO	http://www.ebi.ac.uk/enright-srv/microcosm/cgi-bin/targets/v5/detail_view.pl?transcript_id=ENST00000329066
hsa-miR-146a-5p	MIMAT0000449	hsa-miR-146a	16.3	0.0036093	ENST00000382304	Q6ZRR3_HUMAN	http://www.ebi.ac.uk/enright-srv/microcosm/cgi-bin/targets/v5/detail_view.pl?transcript_id=ENST00000382304
hsa-miR-20a-5p	MIMAT0000075	hsa-miR-20a	17.3	0.01	ENST00000354216	UCKL1	http://www.ebi.ac.uk/enright-srv/microcosm/cgi-bin/targets/v5/detail_view.pl?transcript_id=ENST00000354216
hsa-miR-100-5p	MIMAT0000098	hsa-miR-100	14.2	0.0017091	ENST00000300361	Q96F95_HUMAN	http://www.ebi.ac.uk/enright-srv/microcosm/cgi-bin/targets/v5/detail_view.pl?transcript_id=ENST00000300361
hsa-miR-100-5p	MIMAT0000098	hsa-miR-100	14.2	0.0017091	ENST00000300361	Q96F95_HUMAN	http://www.ebi.ac.uk/enright-srv/microcosm/cgi-bin/targets/v5/detail_view.pl?transcript_id=ENST00000300361
hsa-miR-199b-5p	MIMAT0000263	hsa-miR-199b-5p	16.79	0.01	ENST00000369916	C20orf135	http://www.ebi.ac.uk/enright-srv/microcosm/cgi-bin/targets/v5/detail_view.pl?transcript_id=ENST00000369916
hsa-miR-100-5p	MIMAT0000098	hsa-miR-100	14.71	0.04	ENST00000302995	ZBTB46	http://www.ebi.ac.uk/enright-srv/microcosm/cgi-bin/targets/v5/detail_view.pl?transcript_id=ENST00000302995
hsa-miR-196a-3p	MIMAT0004562	hsa-miR-196a*	18.41	0.0048883	ENST00000355969	ZGPAT	http://www.ebi.ac.uk/enright-srv/microcosm/cgi-bin/targets/v5/detail_view.pl?transcript_id=ENST00000355969
hsa-miR-196a-3p	MIMAT0004562	hsa-miR-196a*	18.41	0.0048883	ENST00000369979	ZGPAT	http://www.ebi.ac.uk/enright-srv/microcosm/cgi-bin/targets/v5/detail_view.pl?transcript_id=ENST00000369979
hsa-miR-136-3p	MIMAT0004606	hsa-miR-136*	15.02	0.04	ENST00000359715	ARFRP1	http://www.ebi.ac.uk/enright-srv/microcosm/cgi-bin/targets/v5/detail_view.pl?transcript_id=ENST00000359715
hsa-miR-100-5p	MIMAT0000098	hsa-miR-100	15.6	0.01	ENST00000217188	SRMS	http://www.ebi.ac.uk/enright-srv/microcosm/cgi-bin/targets/v5/detail_view.pl?transcript_id=ENST00000217188
hsa-miR-20a-5p	MIMAT0000075	hsa-miR-20a	17.14	0.0026188	ENST00000217185	PTK6	http://www.ebi.ac.uk/enright-srv/microcosm/cgi-bin/targets/v5/detail_view.pl?transcript_id=ENST00000217185
hsa-miR-136-3p	MIMAT0004606	hsa-miR-136*	15.69	0.02	ENST00000370179	C20orf149	http://www.ebi.ac.uk/enright-srv/microcosm/cgi-bin/targets/v5/detail_view.pl?transcript_id=ENST00000370179
hsa-miR-100-5p	MIMAT0000098	hsa-miR-100	16.82	0.0048733	ENST00000370221	KCNQ2	http://www.ebi.ac.uk/enright-srv/microcosm/cgi-bin/targets/v5/detail_view.pl?transcript_id=ENST00000370221
hsa-miR-100-5p	MIMAT0000098	hsa-miR-100	15.81	0.01	ENST00000245673	BHLHB4	http://www.ebi.ac.uk/enright-srv/microcosm/cgi-bin/targets/v5/detail_view.pl?transcript_id=ENST00000245673
hsa-miR-224-5p	MIMAT0000281	hsa-miR-224	18.86	0.0012587	ENST00000370395	DPH3B	http://www.ebi.ac.uk/enright-srv/microcosm/cgi-bin/targets/v5/detail_view.pl?transcript_id=ENST00000370395
hsa-miR-224-5p	MIMAT0000281	hsa-miR-224	16.69	0.02	ENST00000328644	DPH3B	http://www.ebi.ac.uk/enright-srv/microcosm/cgi-bin/targets/v5/detail_view.pl?transcript_id=ENST00000328644
hsa-miR-146a-5p	MIMAT0000449	hsa-miR-146a	16.38	0.03	ENST00000370487	C20orf20	http://www.ebi.ac.uk/enright-srv/microcosm/cgi-bin/targets/v5/detail_view.pl?transcript_id=ENST00000370487
hsa-miR-100-5p	MIMAT0000098	hsa-miR-100	14.38	0.03	ENST00000370520	Q5JT57_HUMAN	http://www.ebi.ac.uk/enright-srv/microcosm/cgi-bin/targets/v5/detail_view.pl?transcript_id=ENST00000370520
hsa-miR-100-5p	MIMAT0000098	hsa-miR-100	15.76	0.01	ENST00000370522	Q6ZNY1_HUMAN	http://www.ebi.ac.uk/enright-srv/microcosm/cgi-bin/targets/v5/detail_view.pl?transcript_id=ENST00000370522
hsa-miR-199b-5p	MIMAT0000263	hsa-miR-199b-5p	16.32	0.04	ENST00000370675	Q6ZRS1_HUMAN	http://www.ebi.ac.uk/enright-srv/microcosm/cgi-bin/targets/v5/detail_view.pl?transcript_id=ENST00000370675
hsa-miR-100-5p	MIMAT0000098	hsa-miR-100	15.2	0.02	ENST00000389288	LAMA5	http://www.ebi.ac.uk/enright-srv/microcosm/cgi-bin/targets/v5/detail_view.pl?transcript_id=ENST00000389288
hsa-miR-100-5p	MIMAT0000098	hsa-miR-100	15.79	0.01	ENST00000370692	LAMA5	http://www.ebi.ac.uk/enright-srv/microcosm/cgi-bin/targets/v5/detail_view.pl?transcript_id=ENST00000370692
hsa-miR-100-5p	MIMAT0000098	hsa-miR-100	17.28	3.4533e-05	ENST00000252999	LAMA5	http://www.ebi.ac.uk/enright-srv/microcosm/cgi-bin/targets/v5/detail_view.pl?transcript_id=ENST00000252999
hsa-miR-100-5p	MIMAT0000098	hsa-miR-100	15.78	0.01	ENST00000279085	LAMA5	http://www.ebi.ac.uk/enright-srv/microcosm/cgi-bin/targets/v5/detail_view.pl?transcript_id=ENST00000279085
hsa-miR-20a-5p	MIMAT0000075	hsa-miR-20a	16.56	0.0076366	ENST00000370815	GTPBP5	http://www.ebi.ac.uk/enright-srv/microcosm/cgi-bin/targets/v5/detail_view.pl?transcript_id=ENST00000370815
hsa-miR-224-5p	MIMAT0000281	hsa-miR-224	16.57	0.0032019	ENST00000343379	SS18L1	http://www.ebi.ac.uk/enright-srv/microcosm/cgi-bin/targets/v5/detail_view.pl?transcript_id=ENST00000343379
hsa-miR-146a-5p	MIMAT0000449	hsa-miR-146a	15.8	0.0022377	ENST00000266081	LSM14B	http://www.ebi.ac.uk/enright-srv/microcosm/cgi-bin/targets/v5/detail_view.pl?transcript_id=ENST00000266081
hsa-miR-138-1-3p	MIMAT0004607	hsa-miR-138-1*	15.91	0.03	ENST00000300352	LSM14B	http://www.ebi.ac.uk/enright-srv/microcosm/cgi-bin/targets/v5/detail_view.pl?transcript_id=ENST00000300352
hsa-miR-20a-5p	MIMAT0000075	hsa-miR-20a	17.62	0.04	ENST00000279069	LSM14B	http://www.ebi.ac.uk/enright-srv/microcosm/cgi-bin/targets/v5/detail_view.pl?transcript_id=ENST00000279069
hsa-miR-146a-5p	MIMAT0000449	hsa-miR-146a	16.62	0.0011437	ENST00000370908	LSM14B	http://www.ebi.ac.uk/enright-srv/microcosm/cgi-bin/targets/v5/detail_view.pl?transcript_id=ENST00000370908
hsa-miR-146a-5p	MIMAT0000449	hsa-miR-146a	17.28	0.01	ENST00000361670	LSM14B	http://www.ebi.ac.uk/enright-srv/microcosm/cgi-bin/targets/v5/detail_view.pl?transcript_id=ENST00000361670
hsa-miR-146a-5p	MIMAT0000449	hsa-miR-146a	16.14	0.04	ENST00000370915	LSM14B	http://www.ebi.ac.uk/enright-srv/microcosm/cgi-bin/targets/v5/detail_view.pl?transcript_id=ENST00000370915
hsa-miR-224-5p	MIMAT0000281	hsa-miR-224	15.4	0.004495	ENST00000337853	SLMO2	http://www.ebi.ac.uk/enright-srv/microcosm/cgi-bin/targets/v5/detail_view.pl?transcript_id=ENST00000337853
hsa-miR-224-5p	MIMAT0000281	hsa-miR-224	16.23	0.04	ENST00000306082	GNAS	http://www.ebi.ac.uk/enright-srv/microcosm/cgi-bin/targets/v5/detail_view.pl?transcript_id=ENST00000306082
hsa-miR-136-3p	MIMAT0004606	hsa-miR-136*	16.9	0.0078336	ENST00000371081	GNAS	http://www.ebi.ac.uk/enright-srv/microcosm/cgi-bin/targets/v5/detail_view.pl?transcript_id=ENST00000371081
hsa-miR-224-5p	MIMAT0000281	hsa-miR-224	16.23	0.04	ENST00000371082	GNAS	http://www.ebi.ac.uk/enright-srv/microcosm/cgi-bin/targets/v5/detail_view.pl?transcript_id=ENST00000371082
hsa-miR-224-5p	MIMAT0000281	hsa-miR-224	16.23	0.04	ENST00000306090	GNAS	http://www.ebi.ac.uk/enright-srv/microcosm/cgi-bin/targets/v5/detail_view.pl?transcript_id=ENST00000306090
hsa-miR-136-3p	MIMAT0004606	hsa-miR-136*	16.55	0.01	ENST00000371099	GNAS	http://www.ebi.ac.uk/enright-srv/microcosm/cgi-bin/targets/v5/detail_view.pl?transcript_id=ENST00000371099
hsa-miR-224-5p	MIMAT0000281	hsa-miR-224	16.23	0.04	ENST00000371100	GNAS	http://www.ebi.ac.uk/enright-srv/microcosm/cgi-bin/targets/v5/detail_view.pl?transcript_id=ENST00000371100
hsa-miR-224-5p	MIMAT0000281	hsa-miR-224	16.23	0.04	ENST00000306120	GNAS	http://www.ebi.ac.uk/enright-srv/microcosm/cgi-bin/targets/v5/detail_view.pl?transcript_id=ENST00000306120
hsa-miR-136-3p	MIMAT0004606	hsa-miR-136*	18.3	0.0019398	ENST00000312283	NPEPL1	http://www.ebi.ac.uk/enright-srv/microcosm/cgi-bin/targets/v5/detail_view.pl?transcript_id=ENST00000312283
hsa-miR-136-3p	MIMAT0004606	hsa-miR-136*	16.17	0.01	ENST00000371141	NPEPL1	http://www.ebi.ac.uk/enright-srv/microcosm/cgi-bin/targets/v5/detail_view.pl?transcript_id=ENST00000371141
hsa-miR-20a-5p	MIMAT0000075	hsa-miR-20a	17.51	0.04	ENST00000340462	ZBP1	http://www.ebi.ac.uk/enright-srv/microcosm/cgi-bin/targets/v5/detail_view.pl?transcript_id=ENST00000340462
hsa-miR-20a-5p	MIMAT0000075	hsa-miR-20a	17.5	0.04	ENST00000371173	ZBP1	http://www.ebi.ac.uk/enright-srv/microcosm/cgi-bin/targets/v5/detail_view.pl?transcript_id=ENST00000371173
hsa-miR-199b-5p	MIMAT0000263	hsa-miR-199b-5p	16.99	0.01	ENST00000319441	PCK1	http://www.ebi.ac.uk/enright-srv/microcosm/cgi-bin/targets/v5/detail_view.pl?transcript_id=ENST00000319441
hsa-miR-100-5p	MIMAT0000098	hsa-miR-100	14.58	0.04	ENST00000322901	HMG1L1	http://www.ebi.ac.uk/enright-srv/microcosm/cgi-bin/targets/v5/detail_view.pl?transcript_id=ENST00000322901
hsa-miR-196a-3p	MIMAT0004562	hsa-miR-196a*	16.7	0.02	ENST00000344785	RBM38	http://www.ebi.ac.uk/enright-srv/microcosm/cgi-bin/targets/v5/detail_view.pl?transcript_id=ENST00000344785
hsa-miR-199b-5p	MIMAT0000263	hsa-miR-199b-5p	16.39	0.03	ENST00000313184	Q8N1N1_HUMAN	http://www.ebi.ac.uk/enright-srv/microcosm/cgi-bin/targets/v5/detail_view.pl?transcript_id=ENST00000313184
hsa-miR-146a-5p	MIMAT0000449	hsa-miR-146a	15.49	0.0011217	ENST00000371291	BMP7	http://www.ebi.ac.uk/enright-srv/microcosm/cgi-bin/targets/v5/detail_view.pl?transcript_id=ENST00000371291
hsa-miR-224-5p	MIMAT0000281	hsa-miR-224	17.31	0.01	ENST00000243911	MC3R	http://www.ebi.ac.uk/enright-srv/microcosm/cgi-bin/targets/v5/detail_view.pl?transcript_id=ENST00000243911
hsa-miR-136-3p	MIMAT0004606	hsa-miR-136*	15.73	0.02	ENST00000371435	BCAS1	http://www.ebi.ac.uk/enright-srv/microcosm/cgi-bin/targets/v5/detail_view.pl?transcript_id=ENST00000371435
hsa-miR-20a-5p	MIMAT0000075	hsa-miR-20a	17.11	0.0094994	ENST00000371435	BCAS1	http://www.ebi.ac.uk/enright-srv/microcosm/cgi-bin/targets/v5/detail_view.pl?transcript_id=ENST00000371435
hsa-miR-20a-5p	MIMAT0000075	hsa-miR-20a	16.99	0.0028339	ENST00000355985	null	http://www.ebi.ac.uk/enright-srv/microcosm/cgi-bin/targets/v5/detail_view.pl?transcript_id=ENST00000355985
hsa-miR-20a-5p	MIMAT0000075	hsa-miR-20a	16.79	0.0028339	ENST00000355985	null	http://www.ebi.ac.uk/enright-srv/microcosm/cgi-bin/targets/v5/detail_view.pl?transcript_id=ENST00000355985
hsa-miR-146a-5p	MIMAT0000449	hsa-miR-146a	16.06	0.0040274	ENST00000279004	TSHZ2	http://www.ebi.ac.uk/enright-srv/microcosm/cgi-bin/targets/v5/detail_view.pl?transcript_id=ENST00000279004
hsa-miR-146a-5p	MIMAT0000449	hsa-miR-146a	15.61	0.0040274	ENST00000279004	TSHZ2	http://www.ebi.ac.uk/enright-srv/microcosm/cgi-bin/targets/v5/detail_view.pl?transcript_id=ENST00000279004
hsa-miR-196a-3p	MIMAT0004562	hsa-miR-196a*	17.2	0.01	ENST00000371518	ZFP64	http://www.ebi.ac.uk/enright-srv/microcosm/cgi-bin/targets/v5/detail_view.pl?transcript_id=ENST00000371518
hsa-miR-100-5p	MIMAT0000098	hsa-miR-100	14.77	0.0039956	ENST00000338821	ATP9A	http://www.ebi.ac.uk/enright-srv/microcosm/cgi-bin/targets/v5/detail_view.pl?transcript_id=ENST00000338821
hsa-miR-196a-3p	MIMAT0004562	hsa-miR-196a*	15.79	0.04	ENST00000338821	ATP9A	http://www.ebi.ac.uk/enright-srv/microcosm/cgi-bin/targets/v5/detail_view.pl?transcript_id=ENST00000338821
hsa-miR-138-1-3p	MIMAT0004607	hsa-miR-138-1*	16.01	0.02	ENST00000338821	ATP9A	http://www.ebi.ac.uk/enright-srv/microcosm/cgi-bin/targets/v5/detail_view.pl?transcript_id=ENST00000338821
hsa-miR-100-5p	MIMAT0000098	hsa-miR-100	14.09	0.03	ENST00000371567	NFATC2	http://www.ebi.ac.uk/enright-srv/microcosm/cgi-bin/targets/v5/detail_view.pl?transcript_id=ENST00000371567
hsa-miR-100-5p	MIMAT0000098	hsa-miR-100	15.88	0.00016402	ENST00000371571	KCNG1	http://www.ebi.ac.uk/enright-srv/microcosm/cgi-bin/targets/v5/detail_view.pl?transcript_id=ENST00000371571
hsa-miR-196a-3p	MIMAT0004562	hsa-miR-196a*	16.48	0.02	ENST00000371608	BCAS4	http://www.ebi.ac.uk/enright-srv/microcosm/cgi-bin/targets/v5/detail_view.pl?transcript_id=ENST00000371608
hsa-miR-196a-3p	MIMAT0004562	hsa-miR-196a*	16.26	0.03	ENST00000358791	BCAS4	http://www.ebi.ac.uk/enright-srv/microcosm/cgi-bin/targets/v5/detail_view.pl?transcript_id=ENST00000358791
hsa-miR-196a-3p	MIMAT0004562	hsa-miR-196a*	15.39	0.02	ENST00000371644	CEBPB	http://www.ebi.ac.uk/enright-srv/microcosm/cgi-bin/targets/v5/detail_view.pl?transcript_id=ENST00000371644
hsa-miR-100-5p	MIMAT0000098	hsa-miR-100	14.57	0.04	ENST00000371743	Q5QHF1_HUMAN	http://www.ebi.ac.uk/enright-srv/microcosm/cgi-bin/targets/v5/detail_view.pl?transcript_id=ENST00000371743
hsa-miR-138-1-3p	MIMAT0004607	hsa-miR-138-1*	18.36	0.0024271	ENST00000371743	Q5QHF1_HUMAN	http://www.ebi.ac.uk/enright-srv/microcosm/cgi-bin/targets/v5/detail_view.pl?transcript_id=ENST00000371743
hsa-miR-20a-5p	MIMAT0000075	hsa-miR-20a	17.39	3.1355e-08	ENST00000371752	ZNFX1	http://www.ebi.ac.uk/enright-srv/microcosm/cgi-bin/targets/v5/detail_view.pl?transcript_id=ENST00000371752
hsa-miR-20a-5p	MIMAT0000075	hsa-miR-20a	16.71	3.1355e-08	ENST00000371752	ZNFX1	http://www.ebi.ac.uk/enright-srv/microcosm/cgi-bin/targets/v5/detail_view.pl?transcript_id=ENST00000371752
hsa-miR-100-5p	MIMAT0000098	hsa-miR-100	14.66	0.04	ENST00000371998	NCOA3	http://www.ebi.ac.uk/enright-srv/microcosm/cgi-bin/targets/v5/detail_view.pl?transcript_id=ENST00000371998
hsa-miR-20a-5p	MIMAT0000075	hsa-miR-20a	16.87	0.03	ENST00000328749	null	http://www.ebi.ac.uk/enright-srv/microcosm/cgi-bin/targets/v5/detail_view.pl?transcript_id=ENST00000328749
hsa-miR-136-3p	MIMAT0004606	hsa-miR-136*	15.63	0.02	ENST00000372170	C20orf157	http://www.ebi.ac.uk/enright-srv/microcosm/cgi-bin/targets/v5/detail_view.pl?transcript_id=ENST00000372170
hsa-miR-224-5p	MIMAT0000281	hsa-miR-224	16.17	0.04	ENST00000352077	ELMO2	http://www.ebi.ac.uk/enright-srv/microcosm/cgi-bin/targets/v5/detail_view.pl?transcript_id=ENST00000352077
hsa-miR-199b-5p	MIMAT0000263	hsa-miR-199b-5p	16.53	0.03	ENST00000372223	SLC35C2	http://www.ebi.ac.uk/enright-srv/microcosm/cgi-bin/targets/v5/detail_view.pl?transcript_id=ENST00000372223
hsa-miR-199b-5p	MIMAT0000263	hsa-miR-199b-5p	16.88	0.02	ENST00000243896	SLC35C2	http://www.ebi.ac.uk/enright-srv/microcosm/cgi-bin/targets/v5/detail_view.pl?transcript_id=ENST00000243896
hsa-miR-199b-5p	MIMAT0000263	hsa-miR-199b-5p	16.86	0.02	ENST00000317734	SLC35C2	http://www.ebi.ac.uk/enright-srv/microcosm/cgi-bin/targets/v5/detail_view.pl?transcript_id=ENST00000317734
hsa-miR-224-5p	MIMAT0000281	hsa-miR-224	15.47	0.0043013	ENST00000372285	CD40	http://www.ebi.ac.uk/enright-srv/microcosm/cgi-bin/targets/v5/detail_view.pl?transcript_id=ENST00000372285
hsa-miR-138-1-3p	MIMAT0004607	hsa-miR-138-1*	15.44	0.04	ENST00000372315	SLC12A5	http://www.ebi.ac.uk/enright-srv/microcosm/cgi-bin/targets/v5/detail_view.pl?transcript_id=ENST00000372315
hsa-miR-199b-5p	MIMAT0000263	hsa-miR-199b-5p	16.63	0.0027527	ENST00000322927	ZNF335	http://www.ebi.ac.uk/enright-srv/microcosm/cgi-bin/targets/v5/detail_view.pl?transcript_id=ENST00000322927
hsa-miR-196a-3p	MIMAT0004562	hsa-miR-196a*	16.14	0.0096314	ENST00000372409	C20orf67	http://www.ebi.ac.uk/enright-srv/microcosm/cgi-bin/targets/v5/detail_view.pl?transcript_id=ENST00000372409
hsa-miR-100-5p	MIMAT0000098	hsa-miR-100	15.1	0.02	ENST00000326944	Q8N1K1_HUMAN	http://www.ebi.ac.uk/enright-srv/microcosm/cgi-bin/targets/v5/detail_view.pl?transcript_id=ENST00000326944
hsa-miR-224-5p	MIMAT0000281	hsa-miR-224	17.14	0.01	ENST00000372459	CTSA	http://www.ebi.ac.uk/enright-srv/microcosm/cgi-bin/targets/v5/detail_view.pl?transcript_id=ENST00000372459
hsa-miR-138-1-3p	MIMAT0004607	hsa-miR-138-1*	17.05	0.0095338	ENST00000372474	CTSA	http://www.ebi.ac.uk/enright-srv/microcosm/cgi-bin/targets/v5/detail_view.pl?transcript_id=ENST00000372474
hsa-miR-20a-5p	MIMAT0000075	hsa-miR-20a	17.37	0.0028027	ENST00000372484	CTSA	http://www.ebi.ac.uk/enright-srv/microcosm/cgi-bin/targets/v5/detail_view.pl?transcript_id=ENST00000372484
hsa-miR-196a-3p	MIMAT0004562	hsa-miR-196a*	16.08	0.03	ENST00000342644	SNX21	http://www.ebi.ac.uk/enright-srv/microcosm/cgi-bin/targets/v5/detail_view.pl?transcript_id=ENST00000342644
hsa-miR-146a-5p	MIMAT0000449	hsa-miR-146a	16.74	0.02	ENST00000372545	SNX21	http://www.ebi.ac.uk/enright-srv/microcosm/cgi-bin/targets/v5/detail_view.pl?transcript_id=ENST00000372545
hsa-miR-224-5p	MIMAT0000281	hsa-miR-224	16.11	0.04	ENST00000372614	DNTTIP1	http://www.ebi.ac.uk/enright-srv/microcosm/cgi-bin/targets/v5/detail_view.pl?transcript_id=ENST00000372614
hsa-miR-224-5p	MIMAT0000281	hsa-miR-224	16.11	0.01	ENST00000372622	DNTTIP1	http://www.ebi.ac.uk/enright-srv/microcosm/cgi-bin/targets/v5/detail_view.pl?transcript_id=ENST00000372622
hsa-miR-224-5p	MIMAT0000281	hsa-miR-224	16.4	0.03	ENST00000337230	WFDC3	http://www.ebi.ac.uk/enright-srv/microcosm/cgi-bin/targets/v5/detail_view.pl?transcript_id=ENST00000337230
hsa-miR-20a-5p	MIMAT0000075	hsa-miR-20a	17.52	0.03	ENST00000305458	C20orf168	http://www.ebi.ac.uk/enright-srv/microcosm/cgi-bin/targets/v5/detail_view.pl?transcript_id=ENST00000305458
hsa-miR-136-3p	MIMAT0004606	hsa-miR-136*	17.05	0.0067484	ENST00000289953	WFDC8	http://www.ebi.ac.uk/enright-srv/microcosm/cgi-bin/targets/v5/detail_view.pl?transcript_id=ENST00000289953
hsa-miR-199b-5p	MIMAT0000263	hsa-miR-199b-5p	16.13	0.04	ENST00000372689	PIGT	http://www.ebi.ac.uk/enright-srv/microcosm/cgi-bin/targets/v5/detail_view.pl?transcript_id=ENST00000372689
hsa-miR-199b-5p	MIMAT0000263	hsa-miR-199b-5p	16.14	0.04	ENST00000243979	PIGT	http://www.ebi.ac.uk/enright-srv/microcosm/cgi-bin/targets/v5/detail_view.pl?transcript_id=ENST00000243979
hsa-miR-199b-5p	MIMAT0000263	hsa-miR-199b-5p	16.15	1.4735e-06	ENST00000279036	PIGT	http://www.ebi.ac.uk/enright-srv/microcosm/cgi-bin/targets/v5/detail_view.pl?transcript_id=ENST00000279036
hsa-miR-100-5p	MIMAT0000098	hsa-miR-100	15.8	0.01	ENST00000372887	PKIG	http://www.ebi.ac.uk/enright-srv/microcosm/cgi-bin/targets/v5/detail_view.pl?transcript_id=ENST00000372887
hsa-miR-224-5p	MIMAT0000281	hsa-miR-224	16.68	0.02	ENST00000306731	C20orf62	http://www.ebi.ac.uk/enright-srv/microcosm/cgi-bin/targets/v5/detail_view.pl?transcript_id=ENST00000306731
hsa-miR-146a-5p	MIMAT0000449	hsa-miR-146a	17.63	0.00049852	ENST00000217043	R3HDML	http://www.ebi.ac.uk/enright-srv/microcosm/cgi-bin/targets/v5/detail_view.pl?transcript_id=ENST00000217043
hsa-miR-138-1-3p	MIMAT0004607	hsa-miR-138-1*	15.48	0.04	ENST00000372947	GDAP1L1	http://www.ebi.ac.uk/enright-srv/microcosm/cgi-bin/targets/v5/detail_view.pl?transcript_id=ENST00000372947
hsa-miR-138-1-3p	MIMAT0004607	hsa-miR-138-1*	15.57	0.04	ENST00000372952	GDAP1L1	http://www.ebi.ac.uk/enright-srv/microcosm/cgi-bin/targets/v5/detail_view.pl?transcript_id=ENST00000372952
hsa-miR-146a-5p	MIMAT0000449	hsa-miR-146a	15.6	0.0042384	ENST00000262604	GDAP1L1	http://www.ebi.ac.uk/enright-srv/microcosm/cgi-bin/targets/v5/detail_view.pl?transcript_id=ENST00000262604
hsa-miR-146a-5p	MIMAT0000449	hsa-miR-146a	15.83	0.0042011	ENST00000255174	C20orf111	http://www.ebi.ac.uk/enright-srv/microcosm/cgi-bin/targets/v5/detail_view.pl?transcript_id=ENST00000255174
hsa-miR-20a-5p	MIMAT0000075	hsa-miR-20a	17.35	0.0036443	ENST00000244025	FAM112A	http://www.ebi.ac.uk/enright-srv/microcosm/cgi-bin/targets/v5/detail_view.pl?transcript_id=ENST00000244025
hsa-miR-196a-3p	MIMAT0004562	hsa-miR-196a*	17.53	0.01	ENST00000217026	MYBL2	http://www.ebi.ac.uk/enright-srv/microcosm/cgi-bin/targets/v5/detail_view.pl?transcript_id=ENST00000217026
hsa-miR-196a-3p	MIMAT0004562	hsa-miR-196a*	16.14	0.03	ENST00000373134	L3MBTL	http://www.ebi.ac.uk/enright-srv/microcosm/cgi-bin/targets/v5/detail_view.pl?transcript_id=ENST00000373134
hsa-miR-196a-3p	MIMAT0004562	hsa-miR-196a*	17.1	0.01	ENST00000373183	PTPRT	http://www.ebi.ac.uk/enright-srv/microcosm/cgi-bin/targets/v5/detail_view.pl?transcript_id=ENST00000373183
hsa-miR-138-1-3p	MIMAT0004607	hsa-miR-138-1*	15.6	0.04	ENST00000373183	PTPRT	http://www.ebi.ac.uk/enright-srv/microcosm/cgi-bin/targets/v5/detail_view.pl?transcript_id=ENST00000373183
hsa-miR-196a-3p	MIMAT0004562	hsa-miR-196a*	16.65	0.02	ENST00000373319	DHX35	http://www.ebi.ac.uk/enright-srv/microcosm/cgi-bin/targets/v5/detail_view.pl?transcript_id=ENST00000373319
hsa-miR-136-3p	MIMAT0004606	hsa-miR-136*	15.96	0.01	ENST00000373319	DHX35	http://www.ebi.ac.uk/enright-srv/microcosm/cgi-bin/targets/v5/detail_view.pl?transcript_id=ENST00000373319
hsa-miR-196a-3p	MIMAT0004562	hsa-miR-196a*	16.65	0.02	ENST00000252011	DHX35	http://www.ebi.ac.uk/enright-srv/microcosm/cgi-bin/targets/v5/detail_view.pl?transcript_id=ENST00000252011
hsa-miR-136-3p	MIMAT0004606	hsa-miR-136*	15.96	0.01	ENST00000252011	DHX35	http://www.ebi.ac.uk/enright-srv/microcosm/cgi-bin/targets/v5/detail_view.pl?transcript_id=ENST00000252011
hsa-miR-199b-5p	MIMAT0000263	hsa-miR-199b-5p	15.7	0.01	ENST00000252011	DHX35	http://www.ebi.ac.uk/enright-srv/microcosm/cgi-bin/targets/v5/detail_view.pl?transcript_id=ENST00000252011
hsa-miR-100-5p	MIMAT0000098	hsa-miR-100	14.06	0.00083357	ENST00000360116	FAM83D	http://www.ebi.ac.uk/enright-srv/microcosm/cgi-bin/targets/v5/detail_view.pl?transcript_id=ENST00000360116
hsa-miR-100-5p	MIMAT0000098	hsa-miR-100	15.02	0.01	ENST00000243967	C20orf95	http://www.ebi.ac.uk/enright-srv/microcosm/cgi-bin/targets/v5/detail_view.pl?transcript_id=ENST00000243967
hsa-miR-146a-5p	MIMAT0000449	hsa-miR-146a	17.62	0.01	ENST00000373364	Q6ZRV4_HUMAN	http://www.ebi.ac.uk/enright-srv/microcosm/cgi-bin/targets/v5/detail_view.pl?transcript_id=ENST00000373364
hsa-miR-136-3p	MIMAT0004606	hsa-miR-136*	15.8	0.02	ENST00000373364	Q6ZRV4_HUMAN	http://www.ebi.ac.uk/enright-srv/microcosm/cgi-bin/targets/v5/detail_view.pl?transcript_id=ENST00000373364
hsa-miR-138-1-3p	MIMAT0004607	hsa-miR-138-1*	15.04	0.0041153	ENST00000373397	NP_001025035.1	http://www.ebi.ac.uk/enright-srv/microcosm/cgi-bin/targets/v5/detail_view.pl?transcript_id=ENST00000373397
hsa-miR-138-1-3p	MIMAT0004607	hsa-miR-138-1*	14.83	0.0041153	ENST00000373397	NP_001025035.1	http://www.ebi.ac.uk/enright-srv/microcosm/cgi-bin/targets/v5/detail_view.pl?transcript_id=ENST00000373397
hsa-miR-196a-3p	MIMAT0004562	hsa-miR-196a*	16.5	0.02	ENST00000373403	TGM2	http://www.ebi.ac.uk/enright-srv/microcosm/cgi-bin/targets/v5/detail_view.pl?transcript_id=ENST00000373403
hsa-miR-136-3p	MIMAT0004606	hsa-miR-136*	15.42	0.03	ENST00000373403	TGM2	http://www.ebi.ac.uk/enright-srv/microcosm/cgi-bin/targets/v5/detail_view.pl?transcript_id=ENST00000373403
hsa-miR-199b-5p	MIMAT0000263	hsa-miR-199b-5p	16.86	0.02	ENST00000373403	TGM2	http://www.ebi.ac.uk/enright-srv/microcosm/cgi-bin/targets/v5/detail_view.pl?transcript_id=ENST00000373403
hsa-miR-199b-5p	MIMAT0000263	hsa-miR-199b-5p	16.08	0.00067906	ENST00000373461	C20orf102	http://www.ebi.ac.uk/enright-srv/microcosm/cgi-bin/targets/v5/detail_view.pl?transcript_id=ENST00000373461
hsa-miR-224-5p	MIMAT0000281	hsa-miR-224	16.23	0.00058232	ENST00000361383	CTNNBL1	http://www.ebi.ac.uk/enright-srv/microcosm/cgi-bin/targets/v5/detail_view.pl?transcript_id=ENST00000361383
hsa-miR-224-5p	MIMAT0000281	hsa-miR-224	16.23	0.04	ENST00000373478	CTNNBL1	http://www.ebi.ac.uk/enright-srv/microcosm/cgi-bin/targets/v5/detail_view.pl?transcript_id=ENST00000373478
hsa-miR-100-5p	MIMAT0000098	hsa-miR-100	14.89	0.03	ENST00000373889	DLGAP4	http://www.ebi.ac.uk/enright-srv/microcosm/cgi-bin/targets/v5/detail_view.pl?transcript_id=ENST00000373889
hsa-miR-146a-5p	MIMAT0000449	hsa-miR-146a	16.14	0.04	ENST00000373889	DLGAP4	http://www.ebi.ac.uk/enright-srv/microcosm/cgi-bin/targets/v5/detail_view.pl?transcript_id=ENST00000373889
hsa-miR-146a-5p	MIMAT0000449	hsa-miR-146a	16.14	0.04	ENST00000373907	DLGAP4	http://www.ebi.ac.uk/enright-srv/microcosm/cgi-bin/targets/v5/detail_view.pl?transcript_id=ENST00000373907
hsa-miR-199b-5p	MIMAT0000263	hsa-miR-199b-5p	15.98	0.0030786	ENST00000373941	EPB41L1	http://www.ebi.ac.uk/enright-srv/microcosm/cgi-bin/targets/v5/detail_view.pl?transcript_id=ENST00000373941
hsa-miR-199b-5p	MIMAT0000263	hsa-miR-199b-5p	15.98	0.0030786	ENST00000373941	EPB41L1	http://www.ebi.ac.uk/enright-srv/microcosm/cgi-bin/targets/v5/detail_view.pl?transcript_id=ENST00000373941
hsa-miR-138-1-3p	MIMAT0004607	hsa-miR-138-1*	15.47	0.04	ENST00000373950	EPB41L1	http://www.ebi.ac.uk/enright-srv/microcosm/cgi-bin/targets/v5/detail_view.pl?transcript_id=ENST00000373950
hsa-miR-199b-5p	MIMAT0000263	hsa-miR-199b-5p	15.98	0.0030888	ENST00000202028	EPB41L1	http://www.ebi.ac.uk/enright-srv/microcosm/cgi-bin/targets/v5/detail_view.pl?transcript_id=ENST00000202028
hsa-miR-199b-5p	MIMAT0000263	hsa-miR-199b-5p	15.98	0.0030888	ENST00000202028	EPB41L1	http://www.ebi.ac.uk/enright-srv/microcosm/cgi-bin/targets/v5/detail_view.pl?transcript_id=ENST00000202028
hsa-miR-100-5p	MIMAT0000098	hsa-miR-100	14.44	0.0063445	ENST00000373991	SCAND1	http://www.ebi.ac.uk/enright-srv/microcosm/cgi-bin/targets/v5/detail_view.pl?transcript_id=ENST00000373991
hsa-miR-20a-5p	MIMAT0000075	hsa-miR-20a	18.44	0.02	ENST00000317619	RBM12	http://www.ebi.ac.uk/enright-srv/microcosm/cgi-bin/targets/v5/detail_view.pl?transcript_id=ENST00000317619
hsa-miR-20a-5p	MIMAT0000075	hsa-miR-20a	18.44	0.02	ENST00000317677	RBM12	http://www.ebi.ac.uk/enright-srv/microcosm/cgi-bin/targets/v5/detail_view.pl?transcript_id=ENST00000317677
hsa-miR-20a-5p	MIMAT0000075	hsa-miR-20a	18.44	0.02	ENST00000352393	RBM12	http://www.ebi.ac.uk/enright-srv/microcosm/cgi-bin/targets/v5/detail_view.pl?transcript_id=ENST00000352393
hsa-miR-224-5p	MIMAT0000281	hsa-miR-224	16.12	0.04	ENST00000325076	Q5JX50_HUMAN	http://www.ebi.ac.uk/enright-srv/microcosm/cgi-bin/targets/v5/detail_view.pl?transcript_id=ENST00000325076
hsa-miR-224-5p	MIMAT0000281	hsa-miR-224	16.21	0.0019365	ENST00000374372	GDF5	http://www.ebi.ac.uk/enright-srv/microcosm/cgi-bin/targets/v5/detail_view.pl?transcript_id=ENST00000374372
hsa-miR-224-5p	MIMAT0000281	hsa-miR-224	15.46	0.0019365	ENST00000374372	GDF5	http://www.ebi.ac.uk/enright-srv/microcosm/cgi-bin/targets/v5/detail_view.pl?transcript_id=ENST00000374372
hsa-miR-20a-5p	MIMAT0000075	hsa-miR-20a	18.56	0.01	ENST00000374375	GDF5OS	http://www.ebi.ac.uk/enright-srv/microcosm/cgi-bin/targets/v5/detail_view.pl?transcript_id=ENST00000374375
hsa-miR-138-1-3p	MIMAT0004607	hsa-miR-138-1*	16.23	0.02	ENST00000374408	FAM83C	http://www.ebi.ac.uk/enright-srv/microcosm/cgi-bin/targets/v5/detail_view.pl?transcript_id=ENST00000374408
hsa-miR-138-1-3p	MIMAT0004607	hsa-miR-138-1*	16.23	0.02	ENST00000374410	FAM83C	http://www.ebi.ac.uk/enright-srv/microcosm/cgi-bin/targets/v5/detail_view.pl?transcript_id=ENST00000374410
hsa-miR-199b-5p	MIMAT0000263	hsa-miR-199b-5p	15.84	0.0070332	ENST00000246186	MMP24	http://www.ebi.ac.uk/enright-srv/microcosm/cgi-bin/targets/v5/detail_view.pl?transcript_id=ENST00000246186
hsa-miR-136-3p	MIMAT0004606	hsa-miR-136*	15.08	0.04	ENST00000216968	PROCR	http://www.ebi.ac.uk/enright-srv/microcosm/cgi-bin/targets/v5/detail_view.pl?transcript_id=ENST00000216968
hsa-miR-196a-3p	MIMAT0004562	hsa-miR-196a*	15.79	0.04	ENST00000252015	TRPC4AP	http://www.ebi.ac.uk/enright-srv/microcosm/cgi-bin/targets/v5/detail_view.pl?transcript_id=ENST00000252015
hsa-miR-199b-5p	MIMAT0000263	hsa-miR-199b-5p	16.9	0.02	ENST00000216951	GSS	http://www.ebi.ac.uk/enright-srv/microcosm/cgi-bin/targets/v5/detail_view.pl?transcript_id=ENST00000216951
hsa-miR-224-5p	MIMAT0000281	hsa-miR-224	17	0.02	ENST00000374796	NCOA6	http://www.ebi.ac.uk/enright-srv/microcosm/cgi-bin/targets/v5/detail_view.pl?transcript_id=ENST00000374796
hsa-miR-224-5p	MIMAT0000281	hsa-miR-224	17	0.02	ENST00000359003	NCOA6	http://www.ebi.ac.uk/enright-srv/microcosm/cgi-bin/targets/v5/detail_view.pl?transcript_id=ENST00000359003
hsa-miR-196a-3p	MIMAT0004562	hsa-miR-196a*	16.32	0.03	ENST00000374980	EIF2S2	http://www.ebi.ac.uk/enright-srv/microcosm/cgi-bin/targets/v5/detail_view.pl?transcript_id=ENST00000374980
hsa-miR-100-5p	MIMAT0000098	hsa-miR-100	14.2	0.00082323	ENST00000375200	ZNF341	http://www.ebi.ac.uk/enright-srv/microcosm/cgi-bin/targets/v5/detail_view.pl?transcript_id=ENST00000375200
hsa-miR-199b-5p	MIMAT0000263	hsa-miR-199b-5p	15.83	0.0088833	ENST00000357886	CDK5RAP1	http://www.ebi.ac.uk/enright-srv/microcosm/cgi-bin/targets/v5/detail_view.pl?transcript_id=ENST00000357886
hsa-miR-100-5p	MIMAT0000098	hsa-miR-100	15.8	0.01	ENST00000253354	C20orf114	http://www.ebi.ac.uk/enright-srv/microcosm/cgi-bin/targets/v5/detail_view.pl?transcript_id=ENST00000253354
hsa-miR-224-5p	MIMAT0000281	hsa-miR-224	16.57	0.03	ENST00000354932	C20orf70	http://www.ebi.ac.uk/enright-srv/microcosm/cgi-bin/targets/v5/detail_view.pl?transcript_id=ENST00000354932
hsa-miR-224-5p	MIMAT0000281	hsa-miR-224	16.57	0.03	ENST00000253362	C20orf70	http://www.ebi.ac.uk/enright-srv/microcosm/cgi-bin/targets/v5/detail_view.pl?transcript_id=ENST00000253362
hsa-miR-146a-5p	MIMAT0000449	hsa-miR-146a	15.81	0.00058579	ENST00000278980	COMMD7	http://www.ebi.ac.uk/enright-srv/microcosm/cgi-bin/targets/v5/detail_view.pl?transcript_id=ENST00000278980
hsa-miR-100-5p	MIMAT0000098	hsa-miR-100	15.23	0.02	ENST00000375673	C20orf112	http://www.ebi.ac.uk/enright-srv/microcosm/cgi-bin/targets/v5/detail_view.pl?transcript_id=ENST00000375673
hsa-miR-100-5p	MIMAT0000098	hsa-miR-100	14.65	0.0030898	ENST00000375678	C20orf112	http://www.ebi.ac.uk/enright-srv/microcosm/cgi-bin/targets/v5/detail_view.pl?transcript_id=ENST00000375678
hsa-miR-100-5p	MIMAT0000098	hsa-miR-100	14.09	0.0030898	ENST00000375678	C20orf112	http://www.ebi.ac.uk/enright-srv/microcosm/cgi-bin/targets/v5/detail_view.pl?transcript_id=ENST00000375678
hsa-miR-196a-3p	MIMAT0004562	hsa-miR-196a*	15.81	0.04	ENST00000375689	ASXL1	http://www.ebi.ac.uk/enright-srv/microcosm/cgi-bin/targets/v5/detail_view.pl?transcript_id=ENST00000375689
hsa-miR-20a-5p	MIMAT0000075	hsa-miR-20a	17.56	0.04	ENST00000375730	POFUT1	http://www.ebi.ac.uk/enright-srv/microcosm/cgi-bin/targets/v5/detail_view.pl?transcript_id=ENST00000375730
hsa-miR-224-5p	MIMAT0000281	hsa-miR-224	15.81	0.0068429	ENST00000262651	HCK	http://www.ebi.ac.uk/enright-srv/microcosm/cgi-bin/targets/v5/detail_view.pl?transcript_id=ENST00000262651
hsa-miR-136-3p	MIMAT0004606	hsa-miR-136*	15.57	0.02	ENST00000375978	FKHL18	http://www.ebi.ac.uk/enright-srv/microcosm/cgi-bin/targets/v5/detail_view.pl?transcript_id=ENST00000375978
hsa-miR-146a-5p	MIMAT0000449	hsa-miR-146a	16.3	0.04	ENST00000376053	null	http://www.ebi.ac.uk/enright-srv/microcosm/cgi-bin/targets/v5/detail_view.pl?transcript_id=ENST00000376053
hsa-miR-100-5p	MIMAT0000098	hsa-miR-100	14.78	0.02	ENST00000376112	ID1	http://www.ebi.ac.uk/enright-srv/microcosm/cgi-bin/targets/v5/detail_view.pl?transcript_id=ENST00000376112
hsa-miR-136-3p	MIMAT0004606	hsa-miR-136*	15.9	0.0078157	ENST00000317676	DEFB124	http://www.ebi.ac.uk/enright-srv/microcosm/cgi-bin/targets/v5/detail_view.pl?transcript_id=ENST00000317676
hsa-miR-136-3p	MIMAT0004606	hsa-miR-136*	15.57	0.02	ENST00000339144	DEFB119	http://www.ebi.ac.uk/enright-srv/microcosm/cgi-bin/targets/v5/detail_view.pl?transcript_id=ENST00000339144
hsa-miR-138-1-3p	MIMAT0004607	hsa-miR-138-1*	15.7	0.03	ENST00000346061	C20orf80	http://www.ebi.ac.uk/enright-srv/microcosm/cgi-bin/targets/v5/detail_view.pl?transcript_id=ENST00000346061
hsa-miR-138-1-3p	MIMAT0004607	hsa-miR-138-1*	15.7	0.03	ENST00000376336	C20orf80	http://www.ebi.ac.uk/enright-srv/microcosm/cgi-bin/targets/v5/detail_view.pl?transcript_id=ENST00000376336
hsa-miR-138-1-3p	MIMAT0004607	hsa-miR-138-1*	17.31	0.0072736	ENST00000376403	Q5T319_HUMAN	http://www.ebi.ac.uk/enright-srv/microcosm/cgi-bin/targets/v5/detail_view.pl?transcript_id=ENST00000376403
hsa-miR-224-5p	MIMAT0000281	hsa-miR-224	17.07	0.0003617	ENST00000376709	VSX1	http://www.ebi.ac.uk/enright-srv/microcosm/cgi-bin/targets/v5/detail_view.pl?transcript_id=ENST00000376709
hsa-miR-20a-5p	MIMAT0000075	hsa-miR-20a	17.83	0.001472	ENST00000376709	VSX1	http://www.ebi.ac.uk/enright-srv/microcosm/cgi-bin/targets/v5/detail_view.pl?transcript_id=ENST00000376709
hsa-miR-199b-5p	MIMAT0000263	hsa-miR-199b-5p	17.57	0.00010218	ENST00000358754	C20orf3	http://www.ebi.ac.uk/enright-srv/microcosm/cgi-bin/targets/v5/detail_view.pl?transcript_id=ENST00000358754
hsa-miR-196a-3p	MIMAT0004562	hsa-miR-196a*	16.37	0.03	ENST00000304710	CST5	http://www.ebi.ac.uk/enright-srv/microcosm/cgi-bin/targets/v5/detail_view.pl?transcript_id=ENST00000304710
hsa-miR-196a-3p	MIMAT0004562	hsa-miR-196a*	16.37	0.03	ENST00000304725	CST2	http://www.ebi.ac.uk/enright-srv/microcosm/cgi-bin/targets/v5/detail_view.pl?transcript_id=ENST00000304725
hsa-miR-196a-3p	MIMAT0004562	hsa-miR-196a*	17.28	0.01	ENST00000304749	CST1	http://www.ebi.ac.uk/enright-srv/microcosm/cgi-bin/targets/v5/detail_view.pl?transcript_id=ENST00000304749
hsa-miR-196a-3p	MIMAT0004562	hsa-miR-196a*	17.28	0.01	ENST00000217423	CST4	http://www.ebi.ac.uk/enright-srv/microcosm/cgi-bin/targets/v5/detail_view.pl?transcript_id=ENST00000217423
hsa-miR-196a-3p	MIMAT0004562	hsa-miR-196a*	17.28	0.01	ENST00000376925	CST3	http://www.ebi.ac.uk/enright-srv/microcosm/cgi-bin/targets/v5/detail_view.pl?transcript_id=ENST00000376925
hsa-miR-196a-3p	MIMAT0004562	hsa-miR-196a*	17.23	0.0019343	ENST00000254998	NXT1	http://www.ebi.ac.uk/enright-srv/microcosm/cgi-bin/targets/v5/detail_view.pl?transcript_id=ENST00000254998
hsa-miR-196a-3p	MIMAT0004562	hsa-miR-196a*	15.53	0.0019343	ENST00000254998	NXT1	http://www.ebi.ac.uk/enright-srv/microcosm/cgi-bin/targets/v5/detail_view.pl?transcript_id=ENST00000254998
[truncated: 13,311 more rows]

## Sheet: targetscan
mirbase19	matuacc	mirna_name	genesymbol	genedescription	score	details
[truncated: 9,051 more rows]

## Sheet: summary
mirna_name	genesymbol	miranda	mirbase	targetscan	num_statistcs
[truncated: 60,297 more rows]

[truncated: 1 more sheets: Intersection]
