# Supplementary material for: miR-195-5p Regulates Hair Follicle Inductivity of Dermal Papilla Cells by Suppressing Wnt/β-Catenin Activation
Source: Biomed Res Int. 2018 Apr 22;2018:4924356. doi: 10.1155/2018/4924356 (PMC5937601; doi:10.1155/2018/4924356)
Supplement: Supplementary 3 — Table S3: downregulation expressed candidate target genes of miRNAs. [file 4924356.f3.xlsx]

## Sheet: miranda
mirbase19	matuacc	mirnaname	geneid	genesymbol	mirsvrscore	alignment details
hsa-miR-105-3p	MIMAT0004516	hsa-miR-105*	3091	HIF1A	-0.38	http://www.microrna.org/microrna/getMrna.do?gene=3091&matureName=hsa-miR-105*&organism=9606
hsa-miR-105-3p	MIMAT0004516	hsa-miR-105*	400966	RGPD1	-0.2	http://www.microrna.org/microrna/getMrna.do?gene=400966&matureName=hsa-miR-105*&organism=9606
hsa-miR-105-3p	MIMAT0004516	hsa-miR-105*	79980	DSN1	-0.16	http://www.microrna.org/microrna/getMrna.do?gene=79980&matureName=hsa-miR-105*&organism=9606
hsa-miR-105-3p	MIMAT0004516	hsa-miR-105*	29950	SERTAD1	-0.28	http://www.microrna.org/microrna/getMrna.do?gene=29950&matureName=hsa-miR-105*&organism=9606
hsa-miR-105-3p	MIMAT0004516	hsa-miR-105*	9847	KIAA0528	-0.18	http://www.microrna.org/microrna/getMrna.do?gene=9847&matureName=hsa-miR-105*&organism=9606
hsa-miR-105-3p	MIMAT0004516	hsa-miR-105*	64981	MRPL34	-0.45	http://www.microrna.org/microrna/getMrna.do?gene=64981&matureName=hsa-miR-105*&organism=9606
hsa-miR-105-3p	MIMAT0004516	hsa-miR-105*	64981	MRPL34	-0.25	http://www.microrna.org/microrna/getMrna.do?gene=64981&matureName=hsa-miR-105*&organism=9606
hsa-miR-105-3p	MIMAT0004516	hsa-miR-105*	84955	NUDCD1	-0.8	http://www.microrna.org/microrna/getMrna.do?gene=84955&matureName=hsa-miR-105*&organism=9606
hsa-miR-105-3p	MIMAT0004516	hsa-miR-105*	22854	NTNG1	-0.6	http://www.microrna.org/microrna/getMrna.do?gene=22854&matureName=hsa-miR-105*&organism=9606
hsa-miR-105-3p	MIMAT0004516	hsa-miR-105*	50863	NTM	-0.1	http://www.microrna.org/microrna/getMrna.do?gene=50863&matureName=hsa-miR-105*&organism=9606
hsa-miR-105-3p	MIMAT0004516	hsa-miR-105*	221122	LOC221122	-0.13	http://www.microrna.org/microrna/getMrna.do?gene=221122&matureName=hsa-miR-105*&organism=9606
hsa-miR-105-3p	MIMAT0004516	hsa-miR-105*	3689	ITGB2	-0.28	http://www.microrna.org/microrna/getMrna.do?gene=3689&matureName=hsa-miR-105*&organism=9606
hsa-miR-105-3p	MIMAT0004516	hsa-miR-105*	793	CALB1	-0.12	http://www.microrna.org/microrna/getMrna.do?gene=793&matureName=hsa-miR-105*&organism=9606
hsa-miR-105-3p	MIMAT0004516	hsa-miR-105*	7126	TNFAIP1	-0.83	http://www.microrna.org/microrna/getMrna.do?gene=7126&matureName=hsa-miR-105*&organism=9606
hsa-miR-105-3p	MIMAT0004516	hsa-miR-105*	1804	DPP6	-0.42	http://www.microrna.org/microrna/getMrna.do?gene=1804&matureName=hsa-miR-105*&organism=9606
hsa-miR-105-3p	MIMAT0004516	hsa-miR-105*	64067	NPAS3	-0.1	http://www.microrna.org/microrna/getMrna.do?gene=64067&matureName=hsa-miR-105*&organism=9606
hsa-miR-105-3p	MIMAT0004516	hsa-miR-105*	5552	SRGN	-0.23	http://www.microrna.org/microrna/getMrna.do?gene=5552&matureName=hsa-miR-105*&organism=9606
hsa-miR-105-3p	MIMAT0004516	hsa-miR-105*	9542	NRG2	-0.29	http://www.microrna.org/microrna/getMrna.do?gene=9542&matureName=hsa-miR-105*&organism=9606
hsa-miR-105-3p	MIMAT0004516	hsa-miR-105*	3236	HOXD10	-0.21	http://www.microrna.org/microrna/getMrna.do?gene=3236&matureName=hsa-miR-105*&organism=9606
hsa-miR-105-3p	MIMAT0004516	hsa-miR-105*	100288801	FRG2C	-0.23	http://www.microrna.org/microrna/getMrna.do?gene=100288801&matureName=hsa-miR-105*&organism=9606
hsa-miR-105-3p	MIMAT0004516	hsa-miR-105*	5937	RBMS1	-0.36	http://www.microrna.org/microrna/getMrna.do?gene=5937&matureName=hsa-miR-105*&organism=9606
hsa-miR-105-3p	MIMAT0004516	hsa-miR-105*	5136	PDE1A	-0.19	http://www.microrna.org/microrna/getMrna.do?gene=5136&matureName=hsa-miR-105*&organism=9606
hsa-miR-105-3p	MIMAT0004516	hsa-miR-105*	55244	SLC47A1	-0.17	http://www.microrna.org/microrna/getMrna.do?gene=55244&matureName=hsa-miR-105*&organism=9606
hsa-miR-105-3p	MIMAT0004516	hsa-miR-105*	900	CCNG1	-0.92	http://www.microrna.org/microrna/getMrna.do?gene=900&matureName=hsa-miR-105*&organism=9606
hsa-miR-105-3p	MIMAT0004516	hsa-miR-105*	27236	ARFIP1	-0.14	http://www.microrna.org/microrna/getMrna.do?gene=27236&matureName=hsa-miR-105*&organism=9606
hsa-miR-105-3p	MIMAT0004516	hsa-miR-105*	3159	HMGA1	-0.32	http://www.microrna.org/microrna/getMrna.do?gene=3159&matureName=hsa-miR-105*&organism=9606
hsa-miR-105-3p	MIMAT0004516	hsa-miR-105*	23133	PHF8	-0.3	http://www.microrna.org/microrna/getMrna.do?gene=23133&matureName=hsa-miR-105*&organism=9606
hsa-miR-105-3p	MIMAT0004516	hsa-miR-105*	6304	SATB1	-0.15	http://www.microrna.org/microrna/getMrna.do?gene=6304&matureName=hsa-miR-105*&organism=9606
hsa-miR-105-3p	MIMAT0004516	hsa-miR-105*	10111	RAD50	-0.12	http://www.microrna.org/microrna/getMrna.do?gene=10111&matureName=hsa-miR-105*&organism=9606
hsa-miR-105-3p	MIMAT0004516	hsa-miR-105*	342850	ANKRD62	-0.14	http://www.microrna.org/microrna/getMrna.do?gene=342850&matureName=hsa-miR-105*&organism=9606
hsa-miR-105-3p	MIMAT0004516	hsa-miR-105*	4086	SMAD1	-0.13	http://www.microrna.org/microrna/getMrna.do?gene=4086&matureName=hsa-miR-105*&organism=9606
hsa-miR-105-3p	MIMAT0004516	hsa-miR-105*	121274	ZNF641	-0.13	http://www.microrna.org/microrna/getMrna.do?gene=121274&matureName=hsa-miR-105*&organism=9606
hsa-miR-105-3p	MIMAT0004516	hsa-miR-105*	51348	KLRF1	-0.22	http://www.microrna.org/microrna/getMrna.do?gene=51348&matureName=hsa-miR-105*&organism=9606
hsa-miR-105-3p	MIMAT0004516	hsa-miR-105*	5170	PDPK1	-0.11	http://www.microrna.org/microrna/getMrna.do?gene=5170&matureName=hsa-miR-105*&organism=9606
hsa-miR-105-3p	MIMAT0004516	hsa-miR-105*	7332	UBE2L3	-0.22	http://www.microrna.org/microrna/getMrna.do?gene=7332&matureName=hsa-miR-105*&organism=9606
hsa-miR-105-3p	MIMAT0004516	hsa-miR-105*	142685	ASB15	-0.1	http://www.microrna.org/microrna/getMrna.do?gene=142685&matureName=hsa-miR-105*&organism=9606
hsa-miR-105-3p	MIMAT0004516	hsa-miR-105*	22854	NTNG1	-0.43	http://www.microrna.org/microrna/getMrna.do?gene=22854&matureName=hsa-miR-105*&organism=9606
hsa-miR-105-3p	MIMAT0004516	hsa-miR-105*	1010	CDH12	-0.21	http://www.microrna.org/microrna/getMrna.do?gene=1010&matureName=hsa-miR-105*&organism=9606
hsa-miR-105-3p	MIMAT0004516	hsa-miR-105*	1390	CREM	-0.2	http://www.microrna.org/microrna/getMrna.do?gene=1390&matureName=hsa-miR-105*&organism=9606
hsa-miR-105-3p	MIMAT0004516	hsa-miR-105*	83445	GSG1	-0.6	http://www.microrna.org/microrna/getMrna.do?gene=83445&matureName=hsa-miR-105*&organism=9606
hsa-miR-105-3p	MIMAT0004516	hsa-miR-105*	4904	YBX1	-0.82	http://www.microrna.org/microrna/getMrna.do?gene=4904&matureName=hsa-miR-105*&organism=9606
hsa-miR-105-3p	MIMAT0004516	hsa-miR-105*	7750	ZMYM2	-0.19	http://www.microrna.org/microrna/getMrna.do?gene=7750&matureName=hsa-miR-105*&organism=9606
hsa-miR-105-3p	MIMAT0004516	hsa-miR-105*	25890	ABI3BP	-0.12	http://www.microrna.org/microrna/getMrna.do?gene=25890&matureName=hsa-miR-105*&organism=9606
hsa-miR-105-3p	MIMAT0004516	hsa-miR-105*	6609	SMPD1	-0.13	http://www.microrna.org/microrna/getMrna.do?gene=6609&matureName=hsa-miR-105*&organism=9606
hsa-miR-105-3p	MIMAT0004516	hsa-miR-105*	3381	IBSP	-0.11	http://www.microrna.org/microrna/getMrna.do?gene=3381&matureName=hsa-miR-105*&organism=9606
hsa-miR-105-3p	MIMAT0004516	hsa-miR-105*	54916	C14orf101	-0.1	http://www.microrna.org/microrna/getMrna.do?gene=54916&matureName=hsa-miR-105*&organism=9606
hsa-miR-105-3p	MIMAT0004516	hsa-miR-105*	65084	TMEM135	-0.69	http://www.microrna.org/microrna/getMrna.do?gene=65084&matureName=hsa-miR-105*&organism=9606
hsa-miR-105-3p	MIMAT0004516	hsa-miR-105*	60560	NAA35	-0.33	http://www.microrna.org/microrna/getMrna.do?gene=60560&matureName=hsa-miR-105*&organism=9606
hsa-miR-105-3p	MIMAT0004516	hsa-miR-105*	84301	DDI2	-0.22	http://www.microrna.org/microrna/getMrna.do?gene=84301&matureName=hsa-miR-105*&organism=9606
hsa-miR-105-3p	MIMAT0004516	hsa-miR-105*	400581	GRAPL	-0.21	http://www.microrna.org/microrna/getMrna.do?gene=400581&matureName=hsa-miR-105*&organism=9606
hsa-miR-105-3p	MIMAT0004516	hsa-miR-105*	3559	IL2RA	-0.11	http://www.microrna.org/microrna/getMrna.do?gene=3559&matureName=hsa-miR-105*&organism=9606
hsa-miR-105-3p	MIMAT0004516	hsa-miR-105*	89832	CHRFAM7A	-0.18	http://www.microrna.org/microrna/getMrna.do?gene=89832&matureName=hsa-miR-105*&organism=9606
hsa-miR-105-3p	MIMAT0004516	hsa-miR-105*	8943	AP3D1	-0.42	http://www.microrna.org/microrna/getMrna.do?gene=8943&matureName=hsa-miR-105*&organism=9606
hsa-miR-105-3p	MIMAT0004516	hsa-miR-105*	79831	JMJD5	-0.22	http://www.microrna.org/microrna/getMrna.do?gene=79831&matureName=hsa-miR-105*&organism=9606
hsa-miR-105-3p	MIMAT0004516	hsa-miR-105*	1241	LTB4R	-0.61	http://www.microrna.org/microrna/getMrna.do?gene=1241&matureName=hsa-miR-105*&organism=9606
hsa-miR-105-3p	MIMAT0004516	hsa-miR-105*	901	CCNG2	-0.2	http://www.microrna.org/microrna/getMrna.do?gene=901&matureName=hsa-miR-105*&organism=9606
hsa-miR-105-3p	MIMAT0004516	hsa-miR-105*	80144	FRAS1	-0.1	http://www.microrna.org/microrna/getMrna.do?gene=80144&matureName=hsa-miR-105*&organism=9606
hsa-miR-105-3p	MIMAT0004516	hsa-miR-105*	90121	TSR2	-0.89	http://www.microrna.org/microrna/getMrna.do?gene=90121&matureName=hsa-miR-105*&organism=9606
hsa-miR-105-3p	MIMAT0004516	hsa-miR-105*	57486	NLN	-0.18	http://www.microrna.org/microrna/getMrna.do?gene=57486&matureName=hsa-miR-105*&organism=9606
hsa-miR-105-3p	MIMAT0004516	hsa-miR-105*	6941	TCF19	-0.14	http://www.microrna.org/microrna/getMrna.do?gene=6941&matureName=hsa-miR-105*&organism=9606
hsa-miR-105-3p	MIMAT0004516	hsa-miR-105*	27146	FAM184B	-0.14	http://www.microrna.org/microrna/getMrna.do?gene=27146&matureName=hsa-miR-105*&organism=9606
hsa-miR-105-3p	MIMAT0004516	hsa-miR-105*	255926	ADAM5P	-0.54	http://www.microrna.org/microrna/getMrna.do?gene=255926&matureName=hsa-miR-105*&organism=9606
hsa-miR-105-3p	MIMAT0004516	hsa-miR-105*	432369	ATP5EP2	-0.92	http://www.microrna.org/microrna/getMrna.do?gene=432369&matureName=hsa-miR-105*&organism=9606
hsa-miR-105-3p	MIMAT0004516	hsa-miR-105*	4430	MYO1B	-0.15	http://www.microrna.org/microrna/getMrna.do?gene=4430&matureName=hsa-miR-105*&organism=9606
hsa-miR-105-3p	MIMAT0004516	hsa-miR-105*	4929	NR4A2	-0.1	http://www.microrna.org/microrna/getMrna.do?gene=4929&matureName=hsa-miR-105*&organism=9606
hsa-miR-105-3p	MIMAT0004516	hsa-miR-105*	10846	PDE10A	-0.18	http://www.microrna.org/microrna/getMrna.do?gene=10846&matureName=hsa-miR-105*&organism=9606
hsa-miR-105-3p	MIMAT0004516	hsa-miR-105*	388428	LOC388428	-0.22	http://www.microrna.org/microrna/getMrna.do?gene=388428&matureName=hsa-miR-105*&organism=9606
hsa-miR-105-3p	MIMAT0004516	hsa-miR-105*	79719	AAGAB	-0.49	http://www.microrna.org/microrna/getMrna.do?gene=79719&matureName=hsa-miR-105*&organism=9606
hsa-miR-105-3p	MIMAT0004516	hsa-miR-105*	147339	C18orf25	-0.45	http://www.microrna.org/microrna/getMrna.do?gene=147339&matureName=hsa-miR-105*&organism=9606
hsa-miR-105-3p	MIMAT0004516	hsa-miR-105*	8707	B3GALT2	-0.83	http://www.microrna.org/microrna/getMrna.do?gene=8707&matureName=hsa-miR-105*&organism=9606
hsa-miR-105-3p	MIMAT0004516	hsa-miR-105*	64770	CCDC14	-0.1	http://www.microrna.org/microrna/getMrna.do?gene=64770&matureName=hsa-miR-105*&organism=9606
hsa-miR-105-3p	MIMAT0004516	hsa-miR-105*	3560	IL2RB	-0.8	http://www.microrna.org/microrna/getMrna.do?gene=3560&matureName=hsa-miR-105*&organism=9606
hsa-miR-105-3p	MIMAT0004516	hsa-miR-105*	9208	LRRFIP1	-0.15	http://www.microrna.org/microrna/getMrna.do?gene=9208&matureName=hsa-miR-105*&organism=9606
hsa-miR-105-3p	MIMAT0004516	hsa-miR-105*	23199	KIAA0182	-0.18	http://www.microrna.org/microrna/getMrna.do?gene=23199&matureName=hsa-miR-105*&organism=9606
hsa-miR-105-3p	MIMAT0004516	hsa-miR-105*	401466	C8orf59	-0.12	http://www.microrna.org/microrna/getMrna.do?gene=401466&matureName=hsa-miR-105*&organism=9606
hsa-miR-105-3p	MIMAT0004516	hsa-miR-105*	23301	EHBP1	-0.12	http://www.microrna.org/microrna/getMrna.do?gene=23301&matureName=hsa-miR-105*&organism=9606
hsa-miR-105-3p	MIMAT0004516	hsa-miR-105*	2906	GRIN2D	-0.63	http://www.microrna.org/microrna/getMrna.do?gene=2906&matureName=hsa-miR-105*&organism=9606
hsa-miR-105-3p	MIMAT0004516	hsa-miR-105*	54849	DEF8	-0.16	http://www.microrna.org/microrna/getMrna.do?gene=54849&matureName=hsa-miR-105*&organism=9606
hsa-miR-105-3p	MIMAT0004516	hsa-miR-105*	56952	PRTFDC1	-0.85	http://www.microrna.org/microrna/getMrna.do?gene=56952&matureName=hsa-miR-105*&organism=9606
hsa-miR-105-3p	MIMAT0004516	hsa-miR-105*	23131	GPATCH8	-0.11	http://www.microrna.org/microrna/getMrna.do?gene=23131&matureName=hsa-miR-105*&organism=9606
hsa-miR-105-3p	MIMAT0004516	hsa-miR-105*	10981	RAB32	-0.26	http://www.microrna.org/microrna/getMrna.do?gene=10981&matureName=hsa-miR-105*&organism=9606
hsa-miR-105-3p	MIMAT0004516	hsa-miR-105*	28959	TMEM176B	-0.17	http://www.microrna.org/microrna/getMrna.do?gene=28959&matureName=hsa-miR-105*&organism=9606
hsa-miR-105-3p	MIMAT0004516	hsa-miR-105*	3708	ITPR1	-0.15	http://www.microrna.org/microrna/getMrna.do?gene=3708&matureName=hsa-miR-105*&organism=9606
hsa-miR-105-3p	MIMAT0004516	hsa-miR-105*	400966	RGPD1	-0.13	http://www.microrna.org/microrna/getMrna.do?gene=400966&matureName=hsa-miR-105*&organism=9606
hsa-miR-105-3p	MIMAT0004516	hsa-miR-105*	23325	KIAA1033	-0.11	http://www.microrna.org/microrna/getMrna.do?gene=23325&matureName=hsa-miR-105*&organism=9606
hsa-miR-105-3p	MIMAT0004516	hsa-miR-105*	23325	KIAA1033	-0.1	http://www.microrna.org/microrna/getMrna.do?gene=23325&matureName=hsa-miR-105*&organism=9606
hsa-miR-105-3p	MIMAT0004516	hsa-miR-105*	6197	RPS6KA3	-0.51	http://www.microrna.org/microrna/getMrna.do?gene=6197&matureName=hsa-miR-105*&organism=9606
hsa-miR-105-3p	MIMAT0004516	hsa-miR-105*	80205	CHD9	-0.11	http://www.microrna.org/microrna/getMrna.do?gene=80205&matureName=hsa-miR-105*&organism=9606
hsa-miR-105-3p	MIMAT0004516	hsa-miR-105*	80205	CHD9	-0.17	http://www.microrna.org/microrna/getMrna.do?gene=80205&matureName=hsa-miR-105*&organism=9606
hsa-miR-105-3p	MIMAT0004516	hsa-miR-105*	22854	NTNG1	-0.62	http://www.microrna.org/microrna/getMrna.do?gene=22854&matureName=hsa-miR-105*&organism=9606
hsa-miR-105-3p	MIMAT0004516	hsa-miR-105*	952	CD38	-0.11	http://www.microrna.org/microrna/getMrna.do?gene=952&matureName=hsa-miR-105*&organism=9606
hsa-miR-105-3p	MIMAT0004516	hsa-miR-105*	5465	PPARA	-0.1	http://www.microrna.org/microrna/getMrna.do?gene=5465&matureName=hsa-miR-105*&organism=9606
hsa-miR-105-3p	MIMAT0004516	hsa-miR-105*	8924	HERC2	-0.14	http://www.microrna.org/microrna/getMrna.do?gene=8924&matureName=hsa-miR-105*&organism=9606
hsa-miR-105-3p	MIMAT0004516	hsa-miR-105*	1326	MAP3K8	-0.2	http://www.microrna.org/microrna/getMrna.do?gene=1326&matureName=hsa-miR-105*&organism=9606
hsa-miR-105-3p	MIMAT0004516	hsa-miR-105*	8405	SPOP	-0.1	http://www.microrna.org/microrna/getMrna.do?gene=8405&matureName=hsa-miR-105*&organism=9606
hsa-miR-105-3p	MIMAT0004516	hsa-miR-105*	10330	CNPY2	-0.99	http://www.microrna.org/microrna/getMrna.do?gene=10330&matureName=hsa-miR-105*&organism=9606
hsa-miR-105-3p	MIMAT0004516	hsa-miR-105*	54482	CCDC76	-0.1	http://www.microrna.org/microrna/getMrna.do?gene=54482&matureName=hsa-miR-105*&organism=9606
hsa-miR-105-3p	MIMAT0004516	hsa-miR-105*	51377	UCHL5	-0.11	http://www.microrna.org/microrna/getMrna.do?gene=51377&matureName=hsa-miR-105*&organism=9606
hsa-miR-105-3p	MIMAT0004516	hsa-miR-105*	29093	MRPL22	-0.14	http://www.microrna.org/microrna/getMrna.do?gene=29093&matureName=hsa-miR-105*&organism=9606
hsa-miR-105-3p	MIMAT0004516	hsa-miR-105*	10317	B3GALT5	-0.29	http://www.microrna.org/microrna/getMrna.do?gene=10317&matureName=hsa-miR-105*&organism=9606
hsa-miR-105-3p	MIMAT0004516	hsa-miR-105*	171586	ABHD3	-0.25	http://www.microrna.org/microrna/getMrna.do?gene=171586&matureName=hsa-miR-105*&organism=9606
hsa-miR-105-3p	MIMAT0004516	hsa-miR-105*	51429	SNX9	-0.35	http://www.microrna.org/microrna/getMrna.do?gene=51429&matureName=hsa-miR-105*&organism=9606
hsa-miR-105-3p	MIMAT0004516	hsa-miR-105*	26119	LDLRAP1	-0.21	http://www.microrna.org/microrna/getMrna.do?gene=26119&matureName=hsa-miR-105*&organism=9606
hsa-miR-105-3p	MIMAT0004516	hsa-miR-105*	3837	KPNB1	-0.15	http://www.microrna.org/microrna/getMrna.do?gene=3837&matureName=hsa-miR-105*&organism=9606
hsa-miR-105-3p	MIMAT0004516	hsa-miR-105*	91351	DDX60L	-0.1	http://www.microrna.org/microrna/getMrna.do?gene=91351&matureName=hsa-miR-105*&organism=9606
hsa-miR-105-3p	MIMAT0004516	hsa-miR-105*	220042	C11orf82	-0.32	http://www.microrna.org/microrna/getMrna.do?gene=220042&matureName=hsa-miR-105*&organism=9606
hsa-miR-105-3p	MIMAT0004516	hsa-miR-105*	7247	TSN	-0.13	http://www.microrna.org/microrna/getMrna.do?gene=7247&matureName=hsa-miR-105*&organism=9606
hsa-miR-105-3p	MIMAT0004516	hsa-miR-105*	831	CAST	-0.25	http://www.microrna.org/microrna/getMrna.do?gene=831&matureName=hsa-miR-105*&organism=9606
hsa-miR-105-3p	MIMAT0004516	hsa-miR-105*	79800	ALS2CR8	-0.1	http://www.microrna.org/microrna/getMrna.do?gene=79800&matureName=hsa-miR-105*&organism=9606
hsa-miR-105-3p	MIMAT0004516	hsa-miR-105*	1536	CYBB	-0.33	http://www.microrna.org/microrna/getMrna.do?gene=1536&matureName=hsa-miR-105*&organism=9606
hsa-miR-105-3p	MIMAT0004516	hsa-miR-105*	686	BTD	-0.39	http://www.microrna.org/microrna/getMrna.do?gene=686&matureName=hsa-miR-105*&organism=9606
hsa-miR-105-3p	MIMAT0004516	hsa-miR-105*	7571	ZNF23	-0.13	http://www.microrna.org/microrna/getMrna.do?gene=7571&matureName=hsa-miR-105*&organism=9606
hsa-miR-105-3p	MIMAT0004516	hsa-miR-105*	6941	TCF19	-0.14	http://www.microrna.org/microrna/getMrna.do?gene=6941&matureName=hsa-miR-105*&organism=9606
hsa-miR-105-3p	MIMAT0004516	hsa-miR-105*	284361	C19orf63	-0.35	http://www.microrna.org/microrna/getMrna.do?gene=284361&matureName=hsa-miR-105*&organism=9606
hsa-miR-105-3p	MIMAT0004516	hsa-miR-105*	7419	VDAC3	-0.73	http://www.microrna.org/microrna/getMrna.do?gene=7419&matureName=hsa-miR-105*&organism=9606
hsa-miR-105-3p	MIMAT0004516	hsa-miR-105*	10732	TCFL5	-0.1	http://www.microrna.org/microrna/getMrna.do?gene=10732&matureName=hsa-miR-105*&organism=9606
hsa-miR-105-3p	MIMAT0004516	hsa-miR-105*	8723	SNX4	-0.13	http://www.microrna.org/microrna/getMrna.do?gene=8723&matureName=hsa-miR-105*&organism=9606
hsa-miR-105-3p	MIMAT0004516	hsa-miR-105*	9805	SCRN1	-0.1	http://www.microrna.org/microrna/getMrna.do?gene=9805&matureName=hsa-miR-105*&organism=9606
hsa-miR-105-3p	MIMAT0004516	hsa-miR-105*	285852	TREML4	-0.2	http://www.microrna.org/microrna/getMrna.do?gene=285852&matureName=hsa-miR-105*&organism=9606
hsa-miR-105-3p	MIMAT0004516	hsa-miR-105*	5885	RAD21	-0.49	http://www.microrna.org/microrna/getMrna.do?gene=5885&matureName=hsa-miR-105*&organism=9606
hsa-miR-105-3p	MIMAT0004516	hsa-miR-105*	255025	LOC255025	-0.84	http://www.microrna.org/microrna/getMrna.do?gene=255025&matureName=hsa-miR-105*&organism=9606
hsa-miR-105-3p	MIMAT0004516	hsa-miR-105*	50617	ATP6V0A4	-0.17	http://www.microrna.org/microrna/getMrna.do?gene=50617&matureName=hsa-miR-105*&organism=9606
hsa-miR-105-3p	MIMAT0004516	hsa-miR-105*	378925	RNF148	-0.1	http://www.microrna.org/microrna/getMrna.do?gene=378925&matureName=hsa-miR-105*&organism=9606
hsa-miR-105-3p	MIMAT0004516	hsa-miR-105*	57536	KIAA1328	-0.19	http://www.microrna.org/microrna/getMrna.do?gene=57536&matureName=hsa-miR-105*&organism=9606
hsa-miR-105-3p	MIMAT0004516	hsa-miR-105*	439933	MGC42157	-0.4	http://www.microrna.org/microrna/getMrna.do?gene=439933&matureName=hsa-miR-105*&organism=9606
hsa-miR-105-3p	MIMAT0004516	hsa-miR-105*	55328	RNLS	-0.11	http://www.microrna.org/microrna/getMrna.do?gene=55328&matureName=hsa-miR-105*&organism=9606
hsa-miR-105-3p	MIMAT0004516	hsa-miR-105*	1657	DMXL1	-0.11	http://www.microrna.org/microrna/getMrna.do?gene=1657&matureName=hsa-miR-105*&organism=9606
hsa-miR-105-3p	MIMAT0004516	hsa-miR-105*	7531	YWHAE	-0.44	http://www.microrna.org/microrna/getMrna.do?gene=7531&matureName=hsa-miR-105*&organism=9606
hsa-miR-105-3p	MIMAT0004516	hsa-miR-105*	5890	RAD51L1	-1.24	http://www.microrna.org/microrna/getMrna.do?gene=5890&matureName=hsa-miR-105*&organism=9606
hsa-miR-105-3p	MIMAT0004516	hsa-miR-105*	51348	KLRF1	-0.24	http://www.microrna.org/microrna/getMrna.do?gene=51348&matureName=hsa-miR-105*&organism=9606
hsa-miR-105-3p	MIMAT0004516	hsa-miR-105*	9181	ARHGEF2	-0.23	http://www.microrna.org/microrna/getMrna.do?gene=9181&matureName=hsa-miR-105*&organism=9606
hsa-miR-105-3p	MIMAT0004516	hsa-miR-105*	9181	ARHGEF2	-0.15	http://www.microrna.org/microrna/getMrna.do?gene=9181&matureName=hsa-miR-105*&organism=9606
hsa-miR-105-3p	MIMAT0004516	hsa-miR-105*	89876	C3orf15	-0.17	http://www.microrna.org/microrna/getMrna.do?gene=89876&matureName=hsa-miR-105*&organism=9606
hsa-miR-105-3p	MIMAT0004516	hsa-miR-105*	7851	MALL	-0.29	http://www.microrna.org/microrna/getMrna.do?gene=7851&matureName=hsa-miR-105*&organism=9606
hsa-miR-105-3p	MIMAT0004516	hsa-miR-105*	27229	TUBGCP4	-0.1	http://www.microrna.org/microrna/getMrna.do?gene=27229&matureName=hsa-miR-105*&organism=9606
hsa-miR-105-3p	MIMAT0004516	hsa-miR-105*	4750	NEK1	-0.13	http://www.microrna.org/microrna/getMrna.do?gene=4750&matureName=hsa-miR-105*&organism=9606
hsa-miR-105-3p	MIMAT0004516	hsa-miR-105*	5814	PURB	-0.16	http://www.microrna.org/microrna/getMrna.do?gene=5814&matureName=hsa-miR-105*&organism=9606
hsa-miR-105-3p	MIMAT0004516	hsa-miR-105*	144402	CPNE8	-0.28	http://www.microrna.org/microrna/getMrna.do?gene=144402&matureName=hsa-miR-105*&organism=9606
hsa-miR-105-3p	MIMAT0004516	hsa-miR-105*	7753	ZNF202	-0.42	http://www.microrna.org/microrna/getMrna.do?gene=7753&matureName=hsa-miR-105*&organism=9606
hsa-miR-105-3p	MIMAT0004516	hsa-miR-105*	333	APLP1	-0.23	http://www.microrna.org/microrna/getMrna.do?gene=333&matureName=hsa-miR-105*&organism=9606
hsa-miR-105-3p	MIMAT0004516	hsa-miR-105*	55466	DNAJA4	-0.15	http://www.microrna.org/microrna/getMrna.do?gene=55466&matureName=hsa-miR-105*&organism=9606
hsa-miR-105-3p	MIMAT0004516	hsa-miR-105*	6335	SCN9A	-0.82	http://www.microrna.org/microrna/getMrna.do?gene=6335&matureName=hsa-miR-105*&organism=9606
hsa-miR-105-3p	MIMAT0004516	hsa-miR-105*	81605	URM1	-0.19	http://www.microrna.org/microrna/getMrna.do?gene=81605&matureName=hsa-miR-105*&organism=9606
hsa-miR-105-3p	MIMAT0004516	hsa-miR-105*	3683	ITGAL	-0.15	http://www.microrna.org/microrna/getMrna.do?gene=3683&matureName=hsa-miR-105*&organism=9606
hsa-miR-105-3p	MIMAT0004516	hsa-miR-105*	375519	GJB7	-0.28	http://www.microrna.org/microrna/getMrna.do?gene=375519&matureName=hsa-miR-105*&organism=9606
hsa-miR-105-3p	MIMAT0004516	hsa-miR-105*	129685	TAF8	-0.14	http://www.microrna.org/microrna/getMrna.do?gene=129685&matureName=hsa-miR-105*&organism=9606
hsa-miR-105-3p	MIMAT0004516	hsa-miR-105*	150378	FLJ30901	-0.18	http://www.microrna.org/microrna/getMrna.do?gene=150378&matureName=hsa-miR-105*&organism=9606
hsa-miR-105-3p	MIMAT0004516	hsa-miR-105*	64770	CCDC14	-0.1	http://www.microrna.org/microrna/getMrna.do?gene=64770&matureName=hsa-miR-105*&organism=9606
hsa-miR-105-3p	MIMAT0004516	hsa-miR-105*	23408	SIRT5	-0.57	http://www.microrna.org/microrna/getMrna.do?gene=23408&matureName=hsa-miR-105*&organism=9606
hsa-miR-105-3p	MIMAT0004516	hsa-miR-105*	4015	LOX	-0.15	http://www.microrna.org/microrna/getMrna.do?gene=4015&matureName=hsa-miR-105*&organism=9606
hsa-miR-105-3p	MIMAT0004516	hsa-miR-105*	10150	MBNL2	-0.1	http://www.microrna.org/microrna/getMrna.do?gene=10150&matureName=hsa-miR-105*&organism=9606
hsa-miR-105-3p	MIMAT0004516	hsa-miR-105*	51322	WAC	-0.17	http://www.microrna.org/microrna/getMrna.do?gene=51322&matureName=hsa-miR-105*&organism=9606
hsa-miR-105-3p	MIMAT0004516	hsa-miR-105*	594	BCKDHB	-0.33	http://www.microrna.org/microrna/getMrna.do?gene=594&matureName=hsa-miR-105*&organism=9606
hsa-miR-105-3p	MIMAT0004516	hsa-miR-105*	127254	C1orf173	-0.25	http://www.microrna.org/microrna/getMrna.do?gene=127254&matureName=hsa-miR-105*&organism=9606
hsa-miR-105-3p	MIMAT0004516	hsa-miR-105*	79639	TMEM53	-0.18	http://www.microrna.org/microrna/getMrna.do?gene=79639&matureName=hsa-miR-105*&organism=9606
hsa-miR-105-3p	MIMAT0004516	hsa-miR-105*	51081	MRPS7	-0.7	http://www.microrna.org/microrna/getMrna.do?gene=51081&matureName=hsa-miR-105*&organism=9606
hsa-miR-105-3p	MIMAT0004516	hsa-miR-105*	7705	ZNF146	-0.13	http://www.microrna.org/microrna/getMrna.do?gene=7705&matureName=hsa-miR-105*&organism=9606
hsa-miR-105-3p	MIMAT0004516	hsa-miR-105*	64601	VPS16	-0.31	http://www.microrna.org/microrna/getMrna.do?gene=64601&matureName=hsa-miR-105*&organism=9606
hsa-miR-105-3p	MIMAT0004516	hsa-miR-105*	64601	VPS16	-0.23	http://www.microrna.org/microrna/getMrna.do?gene=64601&matureName=hsa-miR-105*&organism=9606
hsa-miR-105-3p	MIMAT0004516	hsa-miR-105*	2210	FCGR1B	-0.14	http://www.microrna.org/microrna/getMrna.do?gene=2210&matureName=hsa-miR-105*&organism=9606
hsa-miR-105-3p	MIMAT0004516	hsa-miR-105*	6941	TCF19	-0.14	http://www.microrna.org/microrna/getMrna.do?gene=6941&matureName=hsa-miR-105*&organism=9606
hsa-miR-105-3p	MIMAT0004516	hsa-miR-105*	7920	BAT5	-0.13	http://www.microrna.org/microrna/getMrna.do?gene=7920&matureName=hsa-miR-105*&organism=9606
hsa-miR-105-3p	MIMAT0004516	hsa-miR-105*	23322	RPGRIP1L	-0.98	http://www.microrna.org/microrna/getMrna.do?gene=23322&matureName=hsa-miR-105*&organism=9606
hsa-miR-105-3p	MIMAT0004516	hsa-miR-105*	23322	RPGRIP1L	-0.14	http://www.microrna.org/microrna/getMrna.do?gene=23322&matureName=hsa-miR-105*&organism=9606
hsa-miR-105-3p	MIMAT0004516	hsa-miR-105*	9113	LATS1	-0.1	http://www.microrna.org/microrna/getMrna.do?gene=9113&matureName=hsa-miR-105*&organism=9606
hsa-miR-105-3p	MIMAT0004516	hsa-miR-105*	8509	NDST2	-0.46	http://www.microrna.org/microrna/getMrna.do?gene=8509&matureName=hsa-miR-105*&organism=9606
hsa-miR-105-3p	MIMAT0004516	hsa-miR-105*	5365	PLXNB3	-0.41	http://www.microrna.org/microrna/getMrna.do?gene=5365&matureName=hsa-miR-105*&organism=9606
hsa-miR-105-3p	MIMAT0004516	hsa-miR-105*	7319	UBE2A	-0.1	http://www.microrna.org/microrna/getMrna.do?gene=7319&matureName=hsa-miR-105*&organism=9606
hsa-miR-105-3p	MIMAT0004516	hsa-miR-105*	1456	CSNK1G3	-0.1	http://www.microrna.org/microrna/getMrna.do?gene=1456&matureName=hsa-miR-105*&organism=9606
hsa-miR-105-3p	MIMAT0004516	hsa-miR-105*	157769	FAM91A1	-0.1	http://www.microrna.org/microrna/getMrna.do?gene=157769&matureName=hsa-miR-105*&organism=9606
hsa-miR-105-3p	MIMAT0004516	hsa-miR-105*	132660	LIN54	-0.11	http://www.microrna.org/microrna/getMrna.do?gene=132660&matureName=hsa-miR-105*&organism=9606
hsa-miR-105-3p	MIMAT0004516	hsa-miR-105*	658	BMPR1B	-0.15	http://www.microrna.org/microrna/getMrna.do?gene=658&matureName=hsa-miR-105*&organism=9606
hsa-miR-105-3p	MIMAT0004516	hsa-miR-105*	280664	WFDC10B	-0.33	http://www.microrna.org/microrna/getMrna.do?gene=280664&matureName=hsa-miR-105*&organism=9606
hsa-miR-105-3p	MIMAT0004516	hsa-miR-105*	952	CD38	-0.1	http://www.microrna.org/microrna/getMrna.do?gene=952&matureName=hsa-miR-105*&organism=9606
hsa-miR-105-3p	MIMAT0004516	hsa-miR-105*	3200	HOXA3	-0.77	http://www.microrna.org/microrna/getMrna.do?gene=3200&matureName=hsa-miR-105*&organism=9606
hsa-miR-105-3p	MIMAT0004516	hsa-miR-105*	3200	HOXA3	-0.16	http://www.microrna.org/microrna/getMrna.do?gene=3200&matureName=hsa-miR-105*&organism=9606
hsa-miR-105-3p	MIMAT0004516	hsa-miR-105*	29951	PDZRN4	-0.15	http://www.microrna.org/microrna/getMrna.do?gene=29951&matureName=hsa-miR-105*&organism=9606
hsa-miR-105-3p	MIMAT0004516	hsa-miR-105*	29951	PDZRN4	-0.14	http://www.microrna.org/microrna/getMrna.do?gene=29951&matureName=hsa-miR-105*&organism=9606
hsa-miR-105-3p	MIMAT0004516	hsa-miR-105*	1390	CREM	-0.16	http://www.microrna.org/microrna/getMrna.do?gene=1390&matureName=hsa-miR-105*&organism=9606
hsa-miR-105-3p	MIMAT0004516	hsa-miR-105*	64342	HS1BP3	-0.68	http://www.microrna.org/microrna/getMrna.do?gene=64342&matureName=hsa-miR-105*&organism=9606
hsa-miR-105-3p	MIMAT0004516	hsa-miR-105*	79670	ZCCHC6	-0.12	http://www.microrna.org/microrna/getMrna.do?gene=79670&matureName=hsa-miR-105*&organism=9606
hsa-miR-105-3p	MIMAT0004516	hsa-miR-105*	10672	GNA13	-0.38	http://www.microrna.org/microrna/getMrna.do?gene=10672&matureName=hsa-miR-105*&organism=9606
hsa-miR-105-3p	MIMAT0004516	hsa-miR-105*	57620	STIM2	-0.13	http://www.microrna.org/microrna/getMrna.do?gene=57620&matureName=hsa-miR-105*&organism=9606
hsa-miR-105-3p	MIMAT0004516	hsa-miR-105*	9693	RAPGEF2	-0.17	http://www.microrna.org/microrna/getMrna.do?gene=9693&matureName=hsa-miR-105*&organism=9606
hsa-miR-105-3p	MIMAT0004516	hsa-miR-105*	79083	MLPH	-0.12	http://www.microrna.org/microrna/getMrna.do?gene=79083&matureName=hsa-miR-105*&organism=9606
hsa-miR-105-3p	MIMAT0004516	hsa-miR-105*	375748	C9orf102	-0.11	http://www.microrna.org/microrna/getMrna.do?gene=375748&matureName=hsa-miR-105*&organism=9606
hsa-miR-105-3p	MIMAT0004516	hsa-miR-105*	11196	SEC23IP	-0.26	http://www.microrna.org/microrna/getMrna.do?gene=11196&matureName=hsa-miR-105*&organism=9606
hsa-miR-105-3p	MIMAT0004516	hsa-miR-105*	7267	TTC3	-0.59	http://www.microrna.org/microrna/getMrna.do?gene=7267&matureName=hsa-miR-105*&organism=9606
hsa-miR-105-3p	MIMAT0004516	hsa-miR-105*	3084	NRG1	-0.1	http://www.microrna.org/microrna/getMrna.do?gene=3084&matureName=hsa-miR-105*&organism=9606
hsa-miR-105-3p	MIMAT0004516	hsa-miR-105*	388564	LOC388564	-0.1	http://www.microrna.org/microrna/getMrna.do?gene=388564&matureName=hsa-miR-105*&organism=9606
hsa-miR-105-3p	MIMAT0004516	hsa-miR-105*	93587	RG9MTD2	-0.28	http://www.microrna.org/microrna/getMrna.do?gene=93587&matureName=hsa-miR-105*&organism=9606
hsa-miR-105-3p	MIMAT0004516	hsa-miR-105*	1139	CHRNA7	-0.15	http://www.microrna.org/microrna/getMrna.do?gene=1139&matureName=hsa-miR-105*&organism=9606
hsa-miR-105-3p	MIMAT0004516	hsa-miR-105*	84306	PDCD2L	-0.19	http://www.microrna.org/microrna/getMrna.do?gene=84306&matureName=hsa-miR-105*&organism=9606
hsa-miR-105-3p	MIMAT0004516	hsa-miR-105*	9902	MRC2	-0.21	http://www.microrna.org/microrna/getMrna.do?gene=9902&matureName=hsa-miR-105*&organism=9606
hsa-miR-105-3p	MIMAT0004516	hsa-miR-105*	25842	ASF1A	-0.27	http://www.microrna.org/microrna/getMrna.do?gene=25842&matureName=hsa-miR-105*&organism=9606
hsa-miR-105-3p	MIMAT0004516	hsa-miR-105*	386618	KCTD4	-0.18	http://www.microrna.org/microrna/getMrna.do?gene=386618&matureName=hsa-miR-105*&organism=9606
hsa-miR-105-3p	MIMAT0004516	hsa-miR-105*	84419	C15orf48	-0.17	http://www.microrna.org/microrna/getMrna.do?gene=84419&matureName=hsa-miR-105*&organism=9606
hsa-miR-105-3p	MIMAT0004516	hsa-miR-105*	284361	C19orf63	-0.33	http://www.microrna.org/microrna/getMrna.do?gene=284361&matureName=hsa-miR-105*&organism=9606
hsa-miR-105-3p	MIMAT0004516	hsa-miR-105*	51348	KLRF1	-0.23	http://www.microrna.org/microrna/getMrna.do?gene=51348&matureName=hsa-miR-105*&organism=9606
hsa-miR-105-3p	MIMAT0004516	hsa-miR-105*	79893	GGNBP2	-0.18	http://www.microrna.org/microrna/getMrna.do?gene=79893&matureName=hsa-miR-105*&organism=9606
hsa-miR-105-3p	MIMAT0004516	hsa-miR-105*	5903	RANBP2	-0.11	http://www.microrna.org/microrna/getMrna.do?gene=5903&matureName=hsa-miR-105*&organism=9606
hsa-miR-105-3p	MIMAT0004516	hsa-miR-105*	10367	CBARA1	-0.26	http://www.microrna.org/microrna/getMrna.do?gene=10367&matureName=hsa-miR-105*&organism=9606
hsa-miR-105-3p	MIMAT0004516	hsa-miR-105*	5279	PIGC	-0.36	http://www.microrna.org/microrna/getMrna.do?gene=5279&matureName=hsa-miR-105*&organism=9606
hsa-miR-105-3p	MIMAT0004516	hsa-miR-105*	168850	ZNF800	-0.2	http://www.microrna.org/microrna/getMrna.do?gene=168850&matureName=hsa-miR-105*&organism=9606
hsa-miR-105-3p	MIMAT0004516	hsa-miR-105*	55789	DEPDC1B	-0.12	http://www.microrna.org/microrna/getMrna.do?gene=55789&matureName=hsa-miR-105*&organism=9606
hsa-miR-105-3p	MIMAT0004516	hsa-miR-105*	56	ACRV1	-0.14	http://www.microrna.org/microrna/getMrna.do?gene=56&matureName=hsa-miR-105*&organism=9606
hsa-miR-105-3p	MIMAT0004516	hsa-miR-105*	57620	STIM2	-0.1	http://www.microrna.org/microrna/getMrna.do?gene=57620&matureName=hsa-miR-105*&organism=9606
hsa-miR-105-3p	MIMAT0004516	hsa-miR-105*	9024	BRSK2	-0.36	http://www.microrna.org/microrna/getMrna.do?gene=9024&matureName=hsa-miR-105*&organism=9606
hsa-miR-105-3p	MIMAT0004516	hsa-miR-105*	9024	BRSK2	-0.27	http://www.microrna.org/microrna/getMrna.do?gene=9024&matureName=hsa-miR-105*&organism=9606
hsa-miR-105-3p	MIMAT0004516	hsa-miR-105*	2992	GYG1	-0.28	http://www.microrna.org/microrna/getMrna.do?gene=2992&matureName=hsa-miR-105*&organism=9606
hsa-miR-105-3p	MIMAT0004516	hsa-miR-105*	7368	UGT8	-0.11	http://www.microrna.org/microrna/getMrna.do?gene=7368&matureName=hsa-miR-105*&organism=9606
hsa-miR-105-3p	MIMAT0004516	hsa-miR-105*	64241	ABCG8	-0.11	http://www.microrna.org/microrna/getMrna.do?gene=64241&matureName=hsa-miR-105*&organism=9606
hsa-miR-105-3p	MIMAT0004516	hsa-miR-105*	643677	LOC643677	-0.49	http://www.microrna.org/microrna/getMrna.do?gene=643677&matureName=hsa-miR-105*&organism=9606
hsa-miR-105-3p	MIMAT0004516	hsa-miR-105*	29801	ZDHHC8	-0.77	http://www.microrna.org/microrna/getMrna.do?gene=29801&matureName=hsa-miR-105*&organism=9606
hsa-miR-105-3p	MIMAT0004516	hsa-miR-105*	10150	MBNL2	-0.11	http://www.microrna.org/microrna/getMrna.do?gene=10150&matureName=hsa-miR-105*&organism=9606
hsa-miR-105-3p	MIMAT0004516	hsa-miR-105*	388951	TSPYL6	-0.46	http://www.microrna.org/microrna/getMrna.do?gene=388951&matureName=hsa-miR-105*&organism=9606
hsa-miR-105-3p	MIMAT0004516	hsa-miR-105*	6523	SLC5A1	-0.46	http://www.microrna.org/microrna/getMrna.do?gene=6523&matureName=hsa-miR-105*&organism=9606
hsa-miR-105-3p	MIMAT0004516	hsa-miR-105*	55907	CMAS	-0.23	http://www.microrna.org/microrna/getMrna.do?gene=55907&matureName=hsa-miR-105*&organism=9606
hsa-miR-105-3p	MIMAT0004516	hsa-miR-105*	440184	C14orf53	-0.19	http://www.microrna.org/microrna/getMrna.do?gene=440184&matureName=hsa-miR-105*&organism=9606
hsa-miR-105-3p	MIMAT0004516	hsa-miR-105*	85411	C6orf114	-0.11	http://www.microrna.org/microrna/getMrna.do?gene=85411&matureName=hsa-miR-105*&organism=9606
hsa-miR-105-3p	MIMAT0004516	hsa-miR-105*	55693	KDM4D	-0.11	http://www.microrna.org/microrna/getMrna.do?gene=55693&matureName=hsa-miR-105*&organism=9606
hsa-miR-105-3p	MIMAT0004516	hsa-miR-105*	90007	MIDN	-0.37	http://www.microrna.org/microrna/getMrna.do?gene=90007&matureName=hsa-miR-105*&organism=9606
hsa-miR-105-3p	MIMAT0004516	hsa-miR-105*	23235	SIK2	-0.47	http://www.microrna.org/microrna/getMrna.do?gene=23235&matureName=hsa-miR-105*&organism=9606
hsa-miR-105-3p	MIMAT0004516	hsa-miR-105*	64116	SLC39A8	-0.11	http://www.microrna.org/microrna/getMrna.do?gene=64116&matureName=hsa-miR-105*&organism=9606
hsa-miR-105-3p	MIMAT0004516	hsa-miR-105*	9961	MVP	-0.43	http://www.microrna.org/microrna/getMrna.do?gene=9961&matureName=hsa-miR-105*&organism=9606
hsa-miR-105-3p	MIMAT0004516	hsa-miR-105*	57536	KIAA1328	-0.44	http://www.microrna.org/microrna/getMrna.do?gene=57536&matureName=hsa-miR-105*&organism=9606
hsa-miR-105-3p	MIMAT0004516	hsa-miR-105*	10847	SRCAP	-0.1	http://www.microrna.org/microrna/getMrna.do?gene=10847&matureName=hsa-miR-105*&organism=9606
hsa-miR-105-3p	MIMAT0004516	hsa-miR-105*	255926	ADAM5P	-0.64	http://www.microrna.org/microrna/getMrna.do?gene=255926&matureName=hsa-miR-105*&organism=9606
hsa-miR-105-3p	MIMAT0004516	hsa-miR-105*	1789	DNMT3B	-0.37	http://www.microrna.org/microrna/getMrna.do?gene=1789&matureName=hsa-miR-105*&organism=9606
hsa-miR-105-3p	MIMAT0004516	hsa-miR-105*	196528	ARID2	-0.22	http://www.microrna.org/microrna/getMrna.do?gene=196528&matureName=hsa-miR-105*&organism=9606
hsa-miR-105-3p	MIMAT0004516	hsa-miR-105*	55244	SLC47A1	-0.15	http://www.microrna.org/microrna/getMrna.do?gene=55244&matureName=hsa-miR-105*&organism=9606
hsa-miR-105-3p	MIMAT0004516	hsa-miR-105*	29797	POM121L8P	-0.2	http://www.microrna.org/microrna/getMrna.do?gene=29797&matureName=hsa-miR-105*&organism=9606
hsa-miR-105-3p	MIMAT0004516	hsa-miR-105*	55795	PCID2	-0.14	http://www.microrna.org/microrna/getMrna.do?gene=55795&matureName=hsa-miR-105*&organism=9606
hsa-miR-105-3p	MIMAT0004516	hsa-miR-105*	80145	THOC7	-0.17	http://www.microrna.org/microrna/getMrna.do?gene=80145&matureName=hsa-miR-105*&organism=9606
hsa-miR-105-3p	MIMAT0004516	hsa-miR-105*	9103	FCGR2C	-0.11	http://www.microrna.org/microrna/getMrna.do?gene=9103&matureName=hsa-miR-105*&organism=9606
hsa-miR-105-3p	MIMAT0004516	hsa-miR-105*	192669	EIF2C3	-0.2	http://www.microrna.org/microrna/getMrna.do?gene=192669&matureName=hsa-miR-105*&organism=9606
hsa-miR-105-3p	MIMAT0004516	hsa-miR-105*	4173	MCM4	-0.94	http://www.microrna.org/microrna/getMrna.do?gene=4173&matureName=hsa-miR-105*&organism=9606
hsa-miR-105-3p	MIMAT0004516	hsa-miR-105*	26077	DKFZP434H168	-0.19	http://www.microrna.org/microrna/getMrna.do?gene=26077&matureName=hsa-miR-105*&organism=9606
hsa-miR-105-3p	MIMAT0004516	hsa-miR-105*	387718	C10orf122	-0.2	http://www.microrna.org/microrna/getMrna.do?gene=387718&matureName=hsa-miR-105*&organism=9606
hsa-miR-105-3p	MIMAT0004516	hsa-miR-105*	4174	MCM5	-0.36	http://www.microrna.org/microrna/getMrna.do?gene=4174&matureName=hsa-miR-105*&organism=9606
hsa-miR-105-3p	MIMAT0004516	hsa-miR-105*	5090	PBX3	-0.27	http://www.microrna.org/microrna/getMrna.do?gene=5090&matureName=hsa-miR-105*&organism=9606
hsa-miR-105-3p	MIMAT0004516	hsa-miR-105*	144809	C13orf30	-0.64	http://www.microrna.org/microrna/getMrna.do?gene=144809&matureName=hsa-miR-105*&organism=9606
hsa-miR-105-3p	MIMAT0004516	hsa-miR-105*	4591	TRIM37	-0.36	http://www.microrna.org/microrna/getMrna.do?gene=4591&matureName=hsa-miR-105*&organism=9606
hsa-miR-105-3p	MIMAT0004516	hsa-miR-105*	5204	PFDN5	-0.85	http://www.microrna.org/microrna/getMrna.do?gene=5204&matureName=hsa-miR-105*&organism=9606
hsa-miR-105-3p	MIMAT0004516	hsa-miR-105*	1995	ELAVL3	-0.19	http://www.microrna.org/microrna/getMrna.do?gene=1995&matureName=hsa-miR-105*&organism=9606
hsa-miR-105-3p	MIMAT0004516	hsa-miR-105*	728411	GUSBP1	-0.49	http://www.microrna.org/microrna/getMrna.do?gene=728411&matureName=hsa-miR-105*&organism=9606
hsa-miR-105-3p	MIMAT0004516	hsa-miR-105*	151011	SEPT10	-0.13	http://www.microrna.org/microrna/getMrna.do?gene=151011&matureName=hsa-miR-105*&organism=9606
hsa-miR-105-3p	MIMAT0004516	hsa-miR-105*	151011	SEPT10	-0.14	http://www.microrna.org/microrna/getMrna.do?gene=151011&matureName=hsa-miR-105*&organism=9606
hsa-miR-105-3p	MIMAT0004516	hsa-miR-105*	53616	ADAM22	-0.35	http://www.microrna.org/microrna/getMrna.do?gene=53616&matureName=hsa-miR-105*&organism=9606
hsa-miR-105-3p	MIMAT0004516	hsa-miR-105*	26074	C20orf26	-0.58	http://www.microrna.org/microrna/getMrna.do?gene=26074&matureName=hsa-miR-105*&organism=9606
hsa-miR-105-3p	MIMAT0004516	hsa-miR-105*	64434	NOM1	-0.27	http://www.microrna.org/microrna/getMrna.do?gene=64434&matureName=hsa-miR-105*&organism=9606
hsa-miR-105-3p	MIMAT0004516	hsa-miR-105*	3159	HMGA1	-0.4	http://www.microrna.org/microrna/getMrna.do?gene=3159&matureName=hsa-miR-105*&organism=9606
hsa-miR-105-3p	MIMAT0004516	hsa-miR-105*	6311	ATXN2	-0.32	http://www.microrna.org/microrna/getMrna.do?gene=6311&matureName=hsa-miR-105*&organism=9606
hsa-miR-105-3p	MIMAT0004516	hsa-miR-105*	114043	C21orf90	-0.26	http://www.microrna.org/microrna/getMrna.do?gene=114043&matureName=hsa-miR-105*&organism=9606
hsa-miR-105-3p	MIMAT0004516	hsa-miR-105*	23284	LPHN3	-0.11	http://www.microrna.org/microrna/getMrna.do?gene=23284&matureName=hsa-miR-105*&organism=9606
hsa-miR-105-3p	MIMAT0004516	hsa-miR-105*	23595	ORC3L	-1.12	http://www.microrna.org/microrna/getMrna.do?gene=23595&matureName=hsa-miR-105*&organism=9606
hsa-miR-105-3p	MIMAT0004516	hsa-miR-105*	4316	MMP7	-0.12	http://www.microrna.org/microrna/getMrna.do?gene=4316&matureName=hsa-miR-105*&organism=9606
hsa-miR-105-3p	MIMAT0004516	hsa-miR-105*	132014	IL17RE	-0.14	http://www.microrna.org/microrna/getMrna.do?gene=132014&matureName=hsa-miR-105*&organism=9606
hsa-miR-105-3p	MIMAT0004516	hsa-miR-105*	90843	TCEAL8	-0.14	http://www.microrna.org/microrna/getMrna.do?gene=90843&matureName=hsa-miR-105*&organism=9606
hsa-miR-105-3p	MIMAT0004516	hsa-miR-105*	151011	SEPT10	-0.12	http://www.microrna.org/microrna/getMrna.do?gene=151011&matureName=hsa-miR-105*&organism=9606
hsa-miR-105-3p	MIMAT0004516	hsa-miR-105*	151011	SEPT10	-0.12	http://www.microrna.org/microrna/getMrna.do?gene=151011&matureName=hsa-miR-105*&organism=9606
hsa-miR-105-3p	MIMAT0004516	hsa-miR-105*	1769	DNAH8	-0.14	http://www.microrna.org/microrna/getMrna.do?gene=1769&matureName=hsa-miR-105*&organism=9606
hsa-miR-105-3p	MIMAT0004516	hsa-miR-105*	51377	UCHL5	-0.14	http://www.microrna.org/microrna/getMrna.do?gene=51377&matureName=hsa-miR-105*&organism=9606
hsa-miR-105-3p	MIMAT0004516	hsa-miR-105*	2878	GPX3	-0.13	http://www.microrna.org/microrna/getMrna.do?gene=2878&matureName=hsa-miR-105*&organism=9606
hsa-miR-105-3p	MIMAT0004516	hsa-miR-105*	145820	LOC145820	-0.13	http://www.microrna.org/microrna/getMrna.do?gene=145820&matureName=hsa-miR-105*&organism=9606
hsa-miR-105-3p	MIMAT0004516	hsa-miR-105*	439933	MGC42157	-0.1	http://www.microrna.org/microrna/getMrna.do?gene=439933&matureName=hsa-miR-105*&organism=9606
hsa-miR-105-3p	MIMAT0004516	hsa-miR-105*	5716	PSMD10	-0.15	http://www.microrna.org/microrna/getMrna.do?gene=5716&matureName=hsa-miR-105*&organism=9606
hsa-miR-105-3p	MIMAT0004516	hsa-miR-105*	7681	MKRN3	-0.17	http://www.microrna.org/microrna/getMrna.do?gene=7681&matureName=hsa-miR-105*&organism=9606
hsa-miR-105-3p	MIMAT0004516	hsa-miR-105*	4017	LOXL2	-0.33	http://www.microrna.org/microrna/getMrna.do?gene=4017&matureName=hsa-miR-105*&organism=9606
hsa-miR-105-3p	MIMAT0004516	hsa-miR-105*	4017	LOXL2	-0.33	http://www.microrna.org/microrna/getMrna.do?gene=4017&matureName=hsa-miR-105*&organism=9606
hsa-miR-105-3p	MIMAT0004516	hsa-miR-105*	79177	ZNF576	-0.11	http://www.microrna.org/microrna/getMrna.do?gene=79177&matureName=hsa-miR-105*&organism=9606
hsa-miR-105-3p	MIMAT0004516	hsa-miR-105*	2983	GUCY1B3	-0.97	http://www.microrna.org/microrna/getMrna.do?gene=2983&matureName=hsa-miR-105*&organism=9606
hsa-miR-105-3p	MIMAT0004516	hsa-miR-105*	6941	TCF19	-0.14	http://www.microrna.org/microrna/getMrna.do?gene=6941&matureName=hsa-miR-105*&organism=9606
hsa-miR-105-3p	MIMAT0004516	hsa-miR-105*	55183	RIF1	-0.76	http://www.microrna.org/microrna/getMrna.do?gene=55183&matureName=hsa-miR-105*&organism=9606
hsa-miR-105-3p	MIMAT0004516	hsa-miR-105*	23678	SGK3	-0.1	http://www.microrna.org/microrna/getMrna.do?gene=23678&matureName=hsa-miR-105*&organism=9606
hsa-miR-105-3p	MIMAT0004516	hsa-miR-105*	1810	DR1	-0.19	http://www.microrna.org/microrna/getMrna.do?gene=1810&matureName=hsa-miR-105*&organism=9606
hsa-miR-105-3p	MIMAT0004516	hsa-miR-105*	3660	IRF2	-0.34	http://www.microrna.org/microrna/getMrna.do?gene=3660&matureName=hsa-miR-105*&organism=9606
hsa-miR-105-3p	MIMAT0004516	hsa-miR-105*	3660	IRF2	-0.17	http://www.microrna.org/microrna/getMrna.do?gene=3660&matureName=hsa-miR-105*&organism=9606
hsa-miR-105-3p	MIMAT0004516	hsa-miR-105*	401884	MGC57346	-0.37	http://www.microrna.org/microrna/getMrna.do?gene=401884&matureName=hsa-miR-105*&organism=9606
hsa-miR-105-3p	MIMAT0004516	hsa-miR-105*	11235	PDCD10	-0.57	http://www.microrna.org/microrna/getMrna.do?gene=11235&matureName=hsa-miR-105*&organism=9606
hsa-miR-105-3p	MIMAT0004516	hsa-miR-105*	64446	DNAI2	-0.25	http://www.microrna.org/microrna/getMrna.do?gene=64446&matureName=hsa-miR-105*&organism=9606
hsa-miR-105-3p	MIMAT0004516	hsa-miR-105*	29904	EEF2K	-0.22	http://www.microrna.org/microrna/getMrna.do?gene=29904&matureName=hsa-miR-105*&organism=9606
hsa-miR-105-3p	MIMAT0004516	hsa-miR-105*	7073	TIAL1	-0.1	http://www.microrna.org/microrna/getMrna.do?gene=7073&matureName=hsa-miR-105*&organism=9606
hsa-miR-105-3p	MIMAT0004516	hsa-miR-105*	84272	YIPF4	-0.1	http://www.microrna.org/microrna/getMrna.do?gene=84272&matureName=hsa-miR-105*&organism=9606
hsa-miR-105-3p	MIMAT0004516	hsa-miR-105*	4603	MYBL1	-0.16	http://www.microrna.org/microrna/getMrna.do?gene=4603&matureName=hsa-miR-105*&organism=9606
hsa-miR-105-3p	MIMAT0004516	hsa-miR-105*	6903	TBCC	-0.77	http://www.microrna.org/microrna/getMrna.do?gene=6903&matureName=hsa-miR-105*&organism=9606
hsa-miR-105-3p	MIMAT0004516	hsa-miR-105*	255926	ADAM5P	-0.57	http://www.microrna.org/microrna/getMrna.do?gene=255926&matureName=hsa-miR-105*&organism=9606
hsa-miR-105-3p	MIMAT0004516	hsa-miR-105*	121665	SPPL3	-0.1	http://www.microrna.org/microrna/getMrna.do?gene=121665&matureName=hsa-miR-105*&organism=9606
hsa-miR-105-3p	MIMAT0004516	hsa-miR-105*	80185	C8orf41	-1.13	http://www.microrna.org/microrna/getMrna.do?gene=80185&matureName=hsa-miR-105*&organism=9606
hsa-miR-105-3p	MIMAT0004516	hsa-miR-105*	54904	WHSC1L1	-0.18	http://www.microrna.org/microrna/getMrna.do?gene=54904&matureName=hsa-miR-105*&organism=9606
hsa-miR-105-3p	MIMAT0004516	hsa-miR-105*	29994	BAZ2B	-0.17	http://www.microrna.org/microrna/getMrna.do?gene=29994&matureName=hsa-miR-105*&organism=9606
hsa-miR-105-3p	MIMAT0004516	hsa-miR-105*	23335	WDR7	-0.19	http://www.microrna.org/microrna/getMrna.do?gene=23335&matureName=hsa-miR-105*&organism=9606
hsa-miR-105-3p	MIMAT0004516	hsa-miR-105*	54059	C21orf57	-0.16	http://www.microrna.org/microrna/getMrna.do?gene=54059&matureName=hsa-miR-105*&organism=9606
hsa-miR-105-3p	MIMAT0004516	hsa-miR-105*	255926	ADAM5P	-0.45	http://www.microrna.org/microrna/getMrna.do?gene=255926&matureName=hsa-miR-105*&organism=9606
hsa-miR-105-3p	MIMAT0004516	hsa-miR-105*	55038	CDCA4	-0.13	http://www.microrna.org/microrna/getMrna.do?gene=55038&matureName=hsa-miR-105*&organism=9606
hsa-miR-105-3p	MIMAT0004516	hsa-miR-105*	11252	PACSIN2	-0.23	http://www.microrna.org/microrna/getMrna.do?gene=11252&matureName=hsa-miR-105*&organism=9606
hsa-miR-105-3p	MIMAT0004516	hsa-miR-105*	117245	HRASLS5	-0.16	http://www.microrna.org/microrna/getMrna.do?gene=117245&matureName=hsa-miR-105*&organism=9606
hsa-miR-105-3p	MIMAT0004516	hsa-miR-105*	910	CD1B	-0.16	http://www.microrna.org/microrna/getMrna.do?gene=910&matureName=hsa-miR-105*&organism=9606
hsa-miR-105-3p	MIMAT0004516	hsa-miR-105*	5791	PTPRE	-0.4	http://www.microrna.org/microrna/getMrna.do?gene=5791&matureName=hsa-miR-105*&organism=9606
hsa-miR-105-3p	MIMAT0004516	hsa-miR-105*	207	AKT1	-0.49	http://www.microrna.org/microrna/getMrna.do?gene=207&matureName=hsa-miR-105*&organism=9606
hsa-miR-105-3p	MIMAT0004516	hsa-miR-105*	5617	PRL	-0.15	http://www.microrna.org/microrna/getMrna.do?gene=5617&matureName=hsa-miR-105*&organism=9606
hsa-miR-105-3p	MIMAT0004516	hsa-miR-105*	10277	UBE4B	-0.18	http://www.microrna.org/microrna/getMrna.do?gene=10277&matureName=hsa-miR-105*&organism=9606
hsa-miR-105-3p	MIMAT0004516	hsa-miR-105*	401507	FAM74A1	-0.47	http://www.microrna.org/microrna/getMrna.do?gene=401507&matureName=hsa-miR-105*&organism=9606
hsa-miR-105-3p	MIMAT0004516	hsa-miR-105*	448831	FRG2	-0.51	http://www.microrna.org/microrna/getMrna.do?gene=448831&matureName=hsa-miR-105*&organism=9606
hsa-miR-105-3p	MIMAT0004516	hsa-miR-105*	255926	ADAM5P	-0.8	http://www.microrna.org/microrna/getMrna.do?gene=255926&matureName=hsa-miR-105*&organism=9606
hsa-miR-105-3p	MIMAT0004516	hsa-miR-105*	92797	HELB	-0.22	http://www.microrna.org/microrna/getMrna.do?gene=92797&matureName=hsa-miR-105*&organism=9606
hsa-miR-105-3p	MIMAT0004516	hsa-miR-105*	22864	R3HDM2	-0.1	http://www.microrna.org/microrna/getMrna.do?gene=22864&matureName=hsa-miR-105*&organism=9606
hsa-miR-105-3p	MIMAT0004516	hsa-miR-105*	84910	TMEM87B	-0.15	http://www.microrna.org/microrna/getMrna.do?gene=84910&matureName=hsa-miR-105*&organism=9606
hsa-miR-105-3p	MIMAT0004516	hsa-miR-105*	55656	INTS8	-0.15	http://www.microrna.org/microrna/getMrna.do?gene=55656&matureName=hsa-miR-105*&organism=9606
hsa-miR-105-3p	MIMAT0004516	hsa-miR-105*	8828	NRP2	-0.76	http://www.microrna.org/microrna/getMrna.do?gene=8828&matureName=hsa-miR-105*&organism=9606
hsa-miR-105-3p	MIMAT0004516	hsa-miR-105*	149563	C1orf64	-0.23	http://www.microrna.org/microrna/getMrna.do?gene=149563&matureName=hsa-miR-105*&organism=9606
hsa-miR-105-3p	MIMAT0004516	hsa-miR-105*	9879	DDX46	-0.49	http://www.microrna.org/microrna/getMrna.do?gene=9879&matureName=hsa-miR-105*&organism=9606
hsa-miR-105-3p	MIMAT0004516	hsa-miR-105*	79908	BTNL8	-0.16	http://www.microrna.org/microrna/getMrna.do?gene=79908&matureName=hsa-miR-105*&organism=9606
hsa-miR-105-3p	MIMAT0004516	hsa-miR-105*	4779	NFE2L1	-0.24	http://www.microrna.org/microrna/getMrna.do?gene=4779&matureName=hsa-miR-105*&organism=9606
hsa-miR-105-3p	MIMAT0004516	hsa-miR-105*	448831	FRG2	-0.75	http://www.microrna.org/microrna/getMrna.do?gene=448831&matureName=hsa-miR-105*&organism=9606
hsa-miR-105-3p	MIMAT0004516	hsa-miR-105*	147409	DSG4	-0.14	http://www.microrna.org/microrna/getMrna.do?gene=147409&matureName=hsa-miR-105*&organism=9606
hsa-miR-105-3p	MIMAT0004516	hsa-miR-105*	729857	RGPD2	-0.13	http://www.microrna.org/microrna/getMrna.do?gene=729857&matureName=hsa-miR-105*&organism=9606
hsa-miR-105-3p	MIMAT0004516	hsa-miR-105*	9452	ITM2A	-0.14	http://www.microrna.org/microrna/getMrna.do?gene=9452&matureName=hsa-miR-105*&organism=9606
hsa-miR-105-3p	MIMAT0004516	hsa-miR-105*	4284	MIP	-0.49	http://www.microrna.org/microrna/getMrna.do?gene=4284&matureName=hsa-miR-105*&organism=9606
hsa-miR-105-3p	MIMAT0004516	hsa-miR-105*	79139	DERL1	-0.23	http://www.microrna.org/microrna/getMrna.do?gene=79139&matureName=hsa-miR-105*&organism=9606
hsa-miR-105-3p	MIMAT0004516	hsa-miR-105*	728279	KRTAP2-2	-0.17	http://www.microrna.org/microrna/getMrna.do?gene=728279&matureName=hsa-miR-105*&organism=9606
hsa-miR-105-3p	MIMAT0004516	hsa-miR-105*	79819	WDR78	-0.16	http://www.microrna.org/microrna/getMrna.do?gene=79819&matureName=hsa-miR-105*&organism=9606
hsa-miR-105-3p	MIMAT0004516	hsa-miR-105*	400954	EML6	-0.35	http://www.microrna.org/microrna/getMrna.do?gene=400954&matureName=hsa-miR-105*&organism=9606
hsa-miR-105-3p	MIMAT0004516	hsa-miR-105*	285419	LOC285419	-0.12	http://www.microrna.org/microrna/getMrna.do?gene=285419&matureName=hsa-miR-105*&organism=9606
hsa-miR-105-3p	MIMAT0004516	hsa-miR-105*	9630	GNA14	-0.13	http://www.microrna.org/microrna/getMrna.do?gene=9630&matureName=hsa-miR-105*&organism=9606
hsa-miR-105-3p	MIMAT0004516	hsa-miR-105*	5992	RFX4	-0.69	http://www.microrna.org/microrna/getMrna.do?gene=5992&matureName=hsa-miR-105*&organism=9606
hsa-miR-105-3p	MIMAT0004516	hsa-miR-105*	2969	GTF2I	-0.1	http://www.microrna.org/microrna/getMrna.do?gene=2969&matureName=hsa-miR-105*&organism=9606
hsa-miR-105-3p	MIMAT0004516	hsa-miR-105*	91801	ALKBH8	-0.18	http://www.microrna.org/microrna/getMrna.do?gene=91801&matureName=hsa-miR-105*&organism=9606
hsa-miR-105-3p	MIMAT0004516	hsa-miR-105*	8284	KDM5D	-0.18	http://www.microrna.org/microrna/getMrna.do?gene=8284&matureName=hsa-miR-105*&organism=9606
hsa-miR-105-3p	MIMAT0004516	hsa-miR-105*	1149	CIDEA	-0.1	http://www.microrna.org/microrna/getMrna.do?gene=1149&matureName=hsa-miR-105*&organism=9606
hsa-miR-105-3p	MIMAT0004516	hsa-miR-105*	117247	SLC16A10	-0.1	http://www.microrna.org/microrna/getMrna.do?gene=117247&matureName=hsa-miR-105*&organism=9606
hsa-miR-105-3p	MIMAT0004516	hsa-miR-105*	23295	MGRN1	-0.1	http://www.microrna.org/microrna/getMrna.do?gene=23295&matureName=hsa-miR-105*&organism=9606
hsa-miR-105-3p	MIMAT0004516	hsa-miR-105*	10492	SYNCRIP	-1.28	http://www.microrna.org/microrna/getMrna.do?gene=10492&matureName=hsa-miR-105*&organism=9606
hsa-miR-105-3p	MIMAT0004516	hsa-miR-105*	255631	COL24A1	-0.1	http://www.microrna.org/microrna/getMrna.do?gene=255631&matureName=hsa-miR-105*&organism=9606
hsa-miR-105-3p	MIMAT0004516	hsa-miR-105*	400509	RUNDC2B	-0.15	http://www.microrna.org/microrna/getMrna.do?gene=400509&matureName=hsa-miR-105*&organism=9606
hsa-miR-105-3p	MIMAT0004516	hsa-miR-105*	4974	OMG	-0.11	http://www.microrna.org/microrna/getMrna.do?gene=4974&matureName=hsa-miR-105*&organism=9606
hsa-miR-105-3p	MIMAT0004516	hsa-miR-105*	5570	PKIB	-0.24	http://www.microrna.org/microrna/getMrna.do?gene=5570&matureName=hsa-miR-105*&organism=9606
hsa-miR-105-3p	MIMAT0004516	hsa-miR-105*	344892	RTP2	-0.37	http://www.microrna.org/microrna/getMrna.do?gene=344892&matureName=hsa-miR-105*&organism=9606
hsa-miR-105-3p	MIMAT0004516	hsa-miR-105*	383	ARG1	-1.23	http://www.microrna.org/microrna/getMrna.do?gene=383&matureName=hsa-miR-105*&organism=9606
hsa-miR-105-3p	MIMAT0004516	hsa-miR-105*	5090	PBX3	-0.25	http://www.microrna.org/microrna/getMrna.do?gene=5090&matureName=hsa-miR-105*&organism=9606
hsa-miR-105-3p	MIMAT0004516	hsa-miR-105*	2880	GPX5	-0.29	http://www.microrna.org/microrna/getMrna.do?gene=2880&matureName=hsa-miR-105*&organism=9606
hsa-miR-105-3p	MIMAT0004516	hsa-miR-105*	6885	MAP3K7	-0.11	http://www.microrna.org/microrna/getMrna.do?gene=6885&matureName=hsa-miR-105*&organism=9606
hsa-miR-105-3p	MIMAT0004516	hsa-miR-105*	51312	SLC25A37	-0.11	http://www.microrna.org/microrna/getMrna.do?gene=51312&matureName=hsa-miR-105*&organism=9606
hsa-miR-105-3p	MIMAT0004516	hsa-miR-105*	3455	IFNAR2	-0.1	http://www.microrna.org/microrna/getMrna.do?gene=3455&matureName=hsa-miR-105*&organism=9606
hsa-miR-105-3p	MIMAT0004516	hsa-miR-105*	10390	CEPT1	-0.21	http://www.microrna.org/microrna/getMrna.do?gene=10390&matureName=hsa-miR-105*&organism=9606
hsa-miR-105-3p	MIMAT0004516	hsa-miR-105*	6885	MAP3K7	-0.12	http://www.microrna.org/microrna/getMrna.do?gene=6885&matureName=hsa-miR-105*&organism=9606
hsa-miR-105-3p	MIMAT0004516	hsa-miR-105*	22854	NTNG1	-0.48	http://www.microrna.org/microrna/getMrna.do?gene=22854&matureName=hsa-miR-105*&organism=9606
hsa-miR-105-3p	MIMAT0004516	hsa-miR-105*	26140	TTLL3	-0.1	http://www.microrna.org/microrna/getMrna.do?gene=26140&matureName=hsa-miR-105*&organism=9606
hsa-miR-105-3p	MIMAT0004516	hsa-miR-105*	55844	PPP2R2D	-0.22	http://www.microrna.org/microrna/getMrna.do?gene=55844&matureName=hsa-miR-105*&organism=9606
hsa-miR-105-3p	MIMAT0004516	hsa-miR-105*	64223	MLST8	-0.37	http://www.microrna.org/microrna/getMrna.do?gene=64223&matureName=hsa-miR-105*&organism=9606
hsa-miR-105-3p	MIMAT0004516	hsa-miR-105*	255926	ADAM5P	-0.52	http://www.microrna.org/microrna/getMrna.do?gene=255926&matureName=hsa-miR-105*&organism=9606
hsa-miR-105-3p	MIMAT0004516	hsa-miR-105*	93081	C13orf27	-0.27	http://www.microrna.org/microrna/getMrna.do?gene=93081&matureName=hsa-miR-105*&organism=9606
hsa-miR-105-3p	MIMAT0004516	hsa-miR-105*	831	CAST	-0.1	http://www.microrna.org/microrna/getMrna.do?gene=831&matureName=hsa-miR-105*&organism=9606
hsa-miR-105-3p	MIMAT0004516	hsa-miR-105*	7089	TLE2	-0.37	http://www.microrna.org/microrna/getMrna.do?gene=7089&matureName=hsa-miR-105*&organism=9606
hsa-miR-105-3p	MIMAT0004516	hsa-miR-105*	159091	FAM122C	-0.15	http://www.microrna.org/microrna/getMrna.do?gene=159091&matureName=hsa-miR-105*&organism=9606
hsa-miR-105-3p	MIMAT0004516	hsa-miR-105*	9024	BRSK2	-0.24	http://www.microrna.org/microrna/getMrna.do?gene=9024&matureName=hsa-miR-105*&organism=9606
hsa-miR-105-3p	MIMAT0004516	hsa-miR-105*	9024	BRSK2	-0.16	http://www.microrna.org/microrna/getMrna.do?gene=9024&matureName=hsa-miR-105*&organism=9606
hsa-miR-105-3p	MIMAT0004516	hsa-miR-105*	23365	ARHGEF12	-0.16	http://www.microrna.org/microrna/getMrna.do?gene=23365&matureName=hsa-miR-105*&organism=9606
hsa-miR-105-3p	MIMAT0004516	hsa-miR-105*	84085	FBXO30	-0.31	http://www.microrna.org/microrna/getMrna.do?gene=84085&matureName=hsa-miR-105*&organism=9606
hsa-miR-105-3p	MIMAT0004516	hsa-miR-105*	5204	PFDN5	-1.1	http://www.microrna.org/microrna/getMrna.do?gene=5204&matureName=hsa-miR-105*&organism=9606
hsa-miR-105-3p	MIMAT0004516	hsa-miR-105*	57492	ARID1B	-0.54	http://www.microrna.org/microrna/getMrna.do?gene=57492&matureName=hsa-miR-105*&organism=9606
hsa-miR-105-3p	MIMAT0004516	hsa-miR-105*	2073	ERCC5	-0.42	http://www.microrna.org/microrna/getMrna.do?gene=2073&matureName=hsa-miR-105*&organism=9606
hsa-miR-105-3p	MIMAT0004516	hsa-miR-105*	51348	KLRF1	-0.3	http://www.microrna.org/microrna/getMrna.do?gene=51348&matureName=hsa-miR-105*&organism=9606
hsa-miR-105-3p	MIMAT0004516	hsa-miR-105*	219445	OR7E5P	-0.59	http://www.microrna.org/microrna/getMrna.do?gene=219445&matureName=hsa-miR-105*&organism=9606
hsa-miR-105-3p	MIMAT0004516	hsa-miR-105*	55526	DHTKD1	-0.64	http://www.microrna.org/microrna/getMrna.do?gene=55526&matureName=hsa-miR-105*&organism=9606
hsa-miR-105-3p	MIMAT0004516	hsa-miR-105*	5411	PNN	-0.25	http://www.microrna.org/microrna/getMrna.do?gene=5411&matureName=hsa-miR-105*&organism=9606
hsa-miR-105-3p	MIMAT0004516	hsa-miR-105*	5376	PMP22	-0.27	http://www.microrna.org/microrna/getMrna.do?gene=5376&matureName=hsa-miR-105*&organism=9606
hsa-miR-105-3p	MIMAT0004516	hsa-miR-105*	27012	KCNV1	-0.14	http://www.microrna.org/microrna/getMrna.do?gene=27012&matureName=hsa-miR-105*&organism=9606
hsa-miR-105-3p	MIMAT0004516	hsa-miR-105*	1612	DAPK1	-0.1	http://www.microrna.org/microrna/getMrna.do?gene=1612&matureName=hsa-miR-105*&organism=9606
hsa-miR-105-3p	MIMAT0004516	hsa-miR-105*	126549	ANKLE1	-0.23	http://www.microrna.org/microrna/getMrna.do?gene=126549&matureName=hsa-miR-105*&organism=9606
hsa-miR-105-3p	MIMAT0004516	hsa-miR-105*	253782	LASS6	-0.78	http://www.microrna.org/microrna/getMrna.do?gene=253782&matureName=hsa-miR-105*&organism=9606
hsa-miR-105-3p	MIMAT0004516	hsa-miR-105*	28952	CCDC22	-0.27	http://www.microrna.org/microrna/getMrna.do?gene=28952&matureName=hsa-miR-105*&organism=9606
hsa-miR-105-3p	MIMAT0004516	hsa-miR-105*	63922	CHTF18	-0.1	http://www.microrna.org/microrna/getMrna.do?gene=63922&matureName=hsa-miR-105*&organism=9606
hsa-miR-105-3p	MIMAT0004516	hsa-miR-105*	2880	GPX5	-0.38	http://www.microrna.org/microrna/getMrna.do?gene=2880&matureName=hsa-miR-105*&organism=9606
hsa-miR-105-3p	MIMAT0004516	hsa-miR-105*	1910	EDNRB	-0.11	http://www.microrna.org/microrna/getMrna.do?gene=1910&matureName=hsa-miR-105*&organism=9606
hsa-miR-105-3p	MIMAT0004516	hsa-miR-105*	22887	FOXJ3	-0.34	http://www.microrna.org/microrna/getMrna.do?gene=22887&matureName=hsa-miR-105*&organism=9606
hsa-miR-105-3p	MIMAT0004516	hsa-miR-105*	27241	BBS9	-0.1	http://www.microrna.org/microrna/getMrna.do?gene=27241&matureName=hsa-miR-105*&organism=9606
hsa-miR-105-3p	MIMAT0004516	hsa-miR-105*	55238	SLC38A7	-0.13	http://www.microrna.org/microrna/getMrna.do?gene=55238&matureName=hsa-miR-105*&organism=9606
hsa-miR-105-3p	MIMAT0004516	hsa-miR-105*	3597	IL13RA1	-0.34	http://www.microrna.org/microrna/getMrna.do?gene=3597&matureName=hsa-miR-105*&organism=9606
hsa-miR-105-3p	MIMAT0004516	hsa-miR-105*	7428	VHL	-0.23	http://www.microrna.org/microrna/getMrna.do?gene=7428&matureName=hsa-miR-105*&organism=9606
hsa-miR-105-3p	MIMAT0004516	hsa-miR-105*	153218	SPINK13	-0.15	http://www.microrna.org/microrna/getMrna.do?gene=153218&matureName=hsa-miR-105*&organism=9606
hsa-miR-105-3p	MIMAT0004516	hsa-miR-105*	51605	TRMT6	-0.19	http://www.microrna.org/microrna/getMrna.do?gene=51605&matureName=hsa-miR-105*&organism=9606
hsa-miR-105-3p	MIMAT0004516	hsa-miR-105*	283860	C16orf81	-0.2	http://www.microrna.org/microrna/getMrna.do?gene=283860&matureName=hsa-miR-105*&organism=9606
hsa-miR-105-3p	MIMAT0004516	hsa-miR-105*	9464	HAND2	-0.13	http://www.microrna.org/microrna/getMrna.do?gene=9464&matureName=hsa-miR-105*&organism=9606
hsa-miR-105-3p	MIMAT0004516	hsa-miR-105*	155061	ZNF746	-0.27	http://www.microrna.org/microrna/getMrna.do?gene=155061&matureName=hsa-miR-105*&organism=9606
hsa-miR-105-3p	MIMAT0004516	hsa-miR-105*	1087	CEACAM7	-0.11	http://www.microrna.org/microrna/getMrna.do?gene=1087&matureName=hsa-miR-105*&organism=9606
hsa-miR-105-3p	MIMAT0004516	hsa-miR-105*	8556	CDC14A	-0.16	http://www.microrna.org/microrna/getMrna.do?gene=8556&matureName=hsa-miR-105*&organism=9606
hsa-miR-105-3p	MIMAT0004516	hsa-miR-105*	1113	CHGA	-0.65	http://www.microrna.org/microrna/getMrna.do?gene=1113&matureName=hsa-miR-105*&organism=9606
hsa-miR-105-3p	MIMAT0004516	hsa-miR-105*	23478	SEC11A	-0.16	http://www.microrna.org/microrna/getMrna.do?gene=23478&matureName=hsa-miR-105*&organism=9606
hsa-miR-105-3p	MIMAT0004516	hsa-miR-105*	1386	ATF2	-0.1	http://www.microrna.org/microrna/getMrna.do?gene=1386&matureName=hsa-miR-105*&organism=9606
hsa-miR-105-3p	MIMAT0004516	hsa-miR-105*	2917	GRM7	-0.74	http://www.microrna.org/microrna/getMrna.do?gene=2917&matureName=hsa-miR-105*&organism=9606
hsa-miR-105-3p	MIMAT0004516	hsa-miR-105*	23471	TRAM1	-0.28	http://www.microrna.org/microrna/getMrna.do?gene=23471&matureName=hsa-miR-105*&organism=9606
hsa-miR-105-3p	MIMAT0004516	hsa-miR-105*	900	CCNG1	-1.11	http://www.microrna.org/microrna/getMrna.do?gene=900&matureName=hsa-miR-105*&organism=9606
hsa-miR-105-3p	MIMAT0004516	hsa-miR-105*	83887	TTLL2	-0.1	http://www.microrna.org/microrna/getMrna.do?gene=83887&matureName=hsa-miR-105*&organism=9606
hsa-miR-105-3p	MIMAT0004516	hsa-miR-105*	344454	AOX2P	-0.82	http://www.microrna.org/microrna/getMrna.do?gene=344454&matureName=hsa-miR-105*&organism=9606
hsa-miR-105-3p	MIMAT0004516	hsa-miR-105*	831	CAST	-0.13	http://www.microrna.org/microrna/getMrna.do?gene=831&matureName=hsa-miR-105*&organism=9606
hsa-miR-105-3p	MIMAT0004516	hsa-miR-105*	167	CRISP1	-0.11	http://www.microrna.org/microrna/getMrna.do?gene=167&matureName=hsa-miR-105*&organism=9606
hsa-miR-105-3p	MIMAT0004516	hsa-miR-105*	255926	ADAM5P	-0.48	http://www.microrna.org/microrna/getMrna.do?gene=255926&matureName=hsa-miR-105*&organism=9606
hsa-miR-105-3p	MIMAT0004516	hsa-miR-105*	5805	PTS	-0.22	http://www.microrna.org/microrna/getMrna.do?gene=5805&matureName=hsa-miR-105*&organism=9606
hsa-miR-105-3p	MIMAT0004516	hsa-miR-105*	1211	CLTA	-0.15	http://www.microrna.org/microrna/getMrna.do?gene=1211&matureName=hsa-miR-105*&organism=9606
hsa-miR-105-3p	MIMAT0004516	hsa-miR-105*	7528	YY1	-0.13	http://www.microrna.org/microrna/getMrna.do?gene=7528&matureName=hsa-miR-105*&organism=9606
hsa-miR-105-3p	MIMAT0004516	hsa-miR-105*	729857	RGPD2	-0.2	http://www.microrna.org/microrna/getMrna.do?gene=729857&matureName=hsa-miR-105*&organism=9606
hsa-miR-105-3p	MIMAT0004516	hsa-miR-105*	57536	KIAA1328	-0.45	http://www.microrna.org/microrna/getMrna.do?gene=57536&matureName=hsa-miR-105*&organism=9606
hsa-miR-105-3p	MIMAT0004516	hsa-miR-105*	200403	VWA3B	-0.1	http://www.microrna.org/microrna/getMrna.do?gene=200403&matureName=hsa-miR-105*&organism=9606
hsa-miR-105-3p	MIMAT0004516	hsa-miR-105*	9083	BPY2	-0.2	http://www.microrna.org/microrna/getMrna.do?gene=9083&matureName=hsa-miR-105*&organism=9606
hsa-miR-105-3p	MIMAT0004516	hsa-miR-105*	5608	MAP2K6	-0.15	http://www.microrna.org/microrna/getMrna.do?gene=5608&matureName=hsa-miR-105*&organism=9606
hsa-miR-105-3p	MIMAT0004516	hsa-miR-105*	145820	LOC145820	-0.12	http://www.microrna.org/microrna/getMrna.do?gene=145820&matureName=hsa-miR-105*&organism=9606
hsa-miR-105-3p	MIMAT0004516	hsa-miR-105*	23048	FNBP1	-0.12	http://www.microrna.org/microrna/getMrna.do?gene=23048&matureName=hsa-miR-105*&organism=9606
hsa-miR-105-3p	MIMAT0004516	hsa-miR-105*	8531	CSDA	-0.19	http://www.microrna.org/microrna/getMrna.do?gene=8531&matureName=hsa-miR-105*&organism=9606
hsa-miR-105-3p	MIMAT0004516	hsa-miR-105*	3691	ITGB4	-0.14	http://www.microrna.org/microrna/getMrna.do?gene=3691&matureName=hsa-miR-105*&organism=9606
hsa-miR-105-3p	MIMAT0004516	hsa-miR-105*	255025	LOC255025	-0.83	http://www.microrna.org/microrna/getMrna.do?gene=255025&matureName=hsa-miR-105*&organism=9606
hsa-miR-105-3p	MIMAT0004516	hsa-miR-105*	1118	CHIT1	-0.15	http://www.microrna.org/microrna/getMrna.do?gene=1118&matureName=hsa-miR-105*&organism=9606
hsa-miR-105-3p	MIMAT0004516	hsa-miR-105*	6423	SFRP2	-0.82	http://www.microrna.org/microrna/getMrna.do?gene=6423&matureName=hsa-miR-105*&organism=9606
hsa-miR-105-3p	MIMAT0004516	hsa-miR-105*	10013	HDAC6	-0.12	http://www.microrna.org/microrna/getMrna.do?gene=10013&matureName=hsa-miR-105*&organism=9606
hsa-miR-105-3p	MIMAT0004516	hsa-miR-105*	202020	FLJ39653	-0.48	http://www.microrna.org/microrna/getMrna.do?gene=202020&matureName=hsa-miR-105*&organism=9606
hsa-miR-105-3p	MIMAT0004516	hsa-miR-105*	55795	PCID2	-0.16	http://www.microrna.org/microrna/getMrna.do?gene=55795&matureName=hsa-miR-105*&organism=9606
hsa-miR-105-3p	MIMAT0004516	hsa-miR-105*	8509	NDST2	-0.32	http://www.microrna.org/microrna/getMrna.do?gene=8509&matureName=hsa-miR-105*&organism=9606
hsa-miR-105-3p	MIMAT0004516	hsa-miR-105*	2778	GNAS	-0.63	http://www.microrna.org/microrna/getMrna.do?gene=2778&matureName=hsa-miR-105*&organism=9606
hsa-miR-105-3p	MIMAT0004516	hsa-miR-105*	2778	GNAS	-0.45	http://www.microrna.org/microrna/getMrna.do?gene=2778&matureName=hsa-miR-105*&organism=9606
hsa-miR-105-3p	MIMAT0004516	hsa-miR-105*	1789	DNMT3B	-0.33	http://www.microrna.org/microrna/getMrna.do?gene=1789&matureName=hsa-miR-105*&organism=9606
hsa-miR-105-3p	MIMAT0004516	hsa-miR-105*	5288	PIK3C2G	-0.6	http://www.microrna.org/microrna/getMrna.do?gene=5288&matureName=hsa-miR-105*&organism=9606
hsa-miR-105-3p	MIMAT0004516	hsa-miR-105*	1282	COL4A1	-0.94	http://www.microrna.org/microrna/getMrna.do?gene=1282&matureName=hsa-miR-105*&organism=9606
hsa-miR-105-3p	MIMAT0004516	hsa-miR-105*	9014	TAF1B	-0.18	http://www.microrna.org/microrna/getMrna.do?gene=9014&matureName=hsa-miR-105*&organism=9606
hsa-miR-105-3p	MIMAT0004516	hsa-miR-105*	10664	CTCF	-1.13	http://www.microrna.org/microrna/getMrna.do?gene=10664&matureName=hsa-miR-105*&organism=9606
hsa-miR-105-3p	MIMAT0004516	hsa-miR-105*	80004	ESRP2	-0.16	http://www.microrna.org/microrna/getMrna.do?gene=80004&matureName=hsa-miR-105*&organism=9606
hsa-miR-105-3p	MIMAT0004516	hsa-miR-105*	654254	ZNF732	-1.09	http://www.microrna.org/microrna/getMrna.do?gene=654254&matureName=hsa-miR-105*&organism=9606
hsa-miR-105-3p	MIMAT0004516	hsa-miR-105*	22854	NTNG1	-0.59	http://www.microrna.org/microrna/getMrna.do?gene=22854&matureName=hsa-miR-105*&organism=9606
hsa-miR-105-3p	MIMAT0004516	hsa-miR-105*	285848	PNPLA1	-0.65	http://www.microrna.org/microrna/getMrna.do?gene=285848&matureName=hsa-miR-105*&organism=9606
hsa-miR-105-3p	MIMAT0004516	hsa-miR-105*	900	CCNG1	-0.56	http://www.microrna.org/microrna/getMrna.do?gene=900&matureName=hsa-miR-105*&organism=9606
hsa-miR-105-3p	MIMAT0004516	hsa-miR-105*	27095	TRAPPC3	-0.1	http://www.microrna.org/microrna/getMrna.do?gene=27095&matureName=hsa-miR-105*&organism=9606
hsa-miR-105-3p	MIMAT0004516	hsa-miR-105*	8021	NUP214	-0.14	http://www.microrna.org/microrna/getMrna.do?gene=8021&matureName=hsa-miR-105*&organism=9606
hsa-miR-105-3p	MIMAT0004516	hsa-miR-105*	388428	LOC388428	-0.12	http://www.microrna.org/microrna/getMrna.do?gene=388428&matureName=hsa-miR-105*&organism=9606
hsa-miR-105-3p	MIMAT0004516	hsa-miR-105*	130813	C2orf50	-0.54	http://www.microrna.org/microrna/getMrna.do?gene=130813&matureName=hsa-miR-105*&organism=9606
hsa-miR-105-3p	MIMAT0004516	hsa-miR-105*	89876	C3orf15	-0.17	http://www.microrna.org/microrna/getMrna.do?gene=89876&matureName=hsa-miR-105*&organism=9606
hsa-miR-105-3p	MIMAT0004516	hsa-miR-105*	2627	GATA6	-0.63	http://www.microrna.org/microrna/getMrna.do?gene=2627&matureName=hsa-miR-105*&organism=9606
hsa-miR-105-3p	MIMAT0004516	hsa-miR-105*	56999	ADAMTS9	-0.16	http://www.microrna.org/microrna/getMrna.do?gene=56999&matureName=hsa-miR-105*&organism=9606
hsa-miR-105-3p	MIMAT0004516	hsa-miR-105*	4697	NDUFA4	-0.84	http://www.microrna.org/microrna/getMrna.do?gene=4697&matureName=hsa-miR-105*&organism=9606
hsa-miR-105-3p	MIMAT0004516	hsa-miR-105*	23258	DENND5A	-0.86	http://www.microrna.org/microrna/getMrna.do?gene=23258&matureName=hsa-miR-105*&organism=9606
hsa-miR-105-3p	MIMAT0004516	hsa-miR-105*	255926	ADAM5P	-0.5	http://www.microrna.org/microrna/getMrna.do?gene=255926&matureName=hsa-miR-105*&organism=9606
hsa-miR-105-3p	MIMAT0004516	hsa-miR-105*	55331	ACER3	-0.1	http://www.microrna.org/microrna/getMrna.do?gene=55331&matureName=hsa-miR-105*&organism=9606
hsa-miR-105-3p	MIMAT0004516	hsa-miR-105*	127255	LRRIQ3	-0.1	http://www.microrna.org/microrna/getMrna.do?gene=127255&matureName=hsa-miR-105*&organism=9606
hsa-miR-105-3p	MIMAT0004516	hsa-miR-105*	167	CRISP1	-0.1	http://www.microrna.org/microrna/getMrna.do?gene=167&matureName=hsa-miR-105*&organism=9606
hsa-miR-105-3p	MIMAT0004516	hsa-miR-105*	54768	HYDIN	-0.99	http://www.microrna.org/microrna/getMrna.do?gene=54768&matureName=hsa-miR-105*&organism=9606
hsa-miR-105-3p	MIMAT0004516	hsa-miR-105*	1009	CDH11	-0.13	http://www.microrna.org/microrna/getMrna.do?gene=1009&matureName=hsa-miR-105*&organism=9606
hsa-miR-105-3p	MIMAT0004516	hsa-miR-105*	23440	OTP	-0.13	http://www.microrna.org/microrna/getMrna.do?gene=23440&matureName=hsa-miR-105*&organism=9606
hsa-miR-105-3p	MIMAT0004516	hsa-miR-105*	100288801	FRG2C	-0.3	http://www.microrna.org/microrna/getMrna.do?gene=100288801&matureName=hsa-miR-105*&organism=9606
hsa-miR-105-3p	MIMAT0004516	hsa-miR-105*	5934	RBL2	-0.42	http://www.microrna.org/microrna/getMrna.do?gene=5934&matureName=hsa-miR-105*&organism=9606
hsa-miR-105-3p	MIMAT0004516	hsa-miR-105*	6941	TCF19	-0.14	http://www.microrna.org/microrna/getMrna.do?gene=6941&matureName=hsa-miR-105*&organism=9606
hsa-miR-105-3p	MIMAT0004516	hsa-miR-105*	51560	RAB6B	-0.15	http://www.microrna.org/microrna/getMrna.do?gene=51560&matureName=hsa-miR-105*&organism=9606
hsa-miR-105-3p	MIMAT0004516	hsa-miR-105*	51379	CRLF3	-0.81	http://www.microrna.org/microrna/getMrna.do?gene=51379&matureName=hsa-miR-105*&organism=9606
hsa-miR-105-3p	MIMAT0004516	hsa-miR-105*	79768	C15orf29	-0.12	http://www.microrna.org/microrna/getMrna.do?gene=79768&matureName=hsa-miR-105*&organism=9606
hsa-miR-105-3p	MIMAT0004516	hsa-miR-105*	4173	MCM4	-0.1	http://www.microrna.org/microrna/getMrna.do?gene=4173&matureName=hsa-miR-105*&organism=9606
hsa-miR-105-3p	MIMAT0004516	hsa-miR-105*	6646	SOAT1	-0.22	http://www.microrna.org/microrna/getMrna.do?gene=6646&matureName=hsa-miR-105*&organism=9606
hsa-miR-105-3p	MIMAT0004516	hsa-miR-105*	151254	ALS2CR11	-0.22	http://www.microrna.org/microrna/getMrna.do?gene=151254&matureName=hsa-miR-105*&organism=9606
hsa-miR-105-3p	MIMAT0004516	hsa-miR-105*	728495	FAM74A3	-0.31	http://www.microrna.org/microrna/getMrna.do?gene=728495&matureName=hsa-miR-105*&organism=9606
hsa-miR-105-3p	MIMAT0004516	hsa-miR-105*	100033432	SNORD116-21	-0.31	http://www.microrna.org/microrna/getMrna.do?gene=100033432&matureName=hsa-miR-105*&organism=9606
hsa-miR-105-3p	MIMAT0004516	hsa-miR-105*	7436	VLDLR	-0.57	http://www.microrna.org/microrna/getMrna.do?gene=7436&matureName=hsa-miR-105*&organism=9606
hsa-miR-105-3p	MIMAT0004516	hsa-miR-105*	650	BMP2	-0.16	http://www.microrna.org/microrna/getMrna.do?gene=650&matureName=hsa-miR-105*&organism=9606
hsa-miR-105-3p	MIMAT0004516	hsa-miR-105*	142678	MIB2	-0.21	http://www.microrna.org/microrna/getMrna.do?gene=142678&matureName=hsa-miR-105*&organism=9606
hsa-miR-105-3p	MIMAT0004516	hsa-miR-105*	200504	GKN2	-0.12	http://www.microrna.org/microrna/getMrna.do?gene=200504&matureName=hsa-miR-105*&organism=9606
hsa-miR-105-3p	MIMAT0004516	hsa-miR-105*	636	BICD1	-0.27	http://www.microrna.org/microrna/getMrna.do?gene=636&matureName=hsa-miR-105*&organism=9606
hsa-miR-105-3p	MIMAT0004516	hsa-miR-105*	401507	FAM74A1	-0.32	http://www.microrna.org/microrna/getMrna.do?gene=401507&matureName=hsa-miR-105*&organism=9606
hsa-miR-105-3p	MIMAT0004516	hsa-miR-105*	23038	WDTC1	-0.18	http://www.microrna.org/microrna/getMrna.do?gene=23038&matureName=hsa-miR-105*&organism=9606
hsa-miR-105-3p	MIMAT0004516	hsa-miR-105*	4794	NFKBIE	-0.1	http://www.microrna.org/microrna/getMrna.do?gene=4794&matureName=hsa-miR-105*&organism=9606
hsa-miR-105-3p	MIMAT0004516	hsa-miR-105*	497661	C18orf32	-0.1	http://www.microrna.org/microrna/getMrna.do?gene=497661&matureName=hsa-miR-105*&organism=9606
hsa-miR-105-3p	MIMAT0004516	hsa-miR-105*	4853	NOTCH2	-0.1	http://www.microrna.org/microrna/getMrna.do?gene=4853&matureName=hsa-miR-105*&organism=9606
hsa-miR-105-3p	MIMAT0004516	hsa-miR-105*	159091	FAM122C	-0.16	http://www.microrna.org/microrna/getMrna.do?gene=159091&matureName=hsa-miR-105*&organism=9606
hsa-miR-105-3p	MIMAT0004516	hsa-miR-105*	90321	ZNF766	-0.64	http://www.microrna.org/microrna/getMrna.do?gene=90321&matureName=hsa-miR-105*&organism=9606
hsa-miR-105-3p	MIMAT0004516	hsa-miR-105*	26063	DECR2	-0.51	http://www.microrna.org/microrna/getMrna.do?gene=26063&matureName=hsa-miR-105*&organism=9606
hsa-miR-105-3p	MIMAT0004516	hsa-miR-105*	6941	TCF19	-0.14	http://www.microrna.org/microrna/getMrna.do?gene=6941&matureName=hsa-miR-105*&organism=9606
hsa-miR-105-3p	MIMAT0004516	hsa-miR-105*	9024	BRSK2	-0.27	http://www.microrna.org/microrna/getMrna.do?gene=9024&matureName=hsa-miR-105*&organism=9606
hsa-miR-105-3p	MIMAT0004516	hsa-miR-105*	9024	BRSK2	-0.18	http://www.microrna.org/microrna/getMrna.do?gene=9024&matureName=hsa-miR-105*&organism=9606
hsa-miR-105-3p	MIMAT0004516	hsa-miR-105*	57477	SHROOM4	-0.49	http://www.microrna.org/microrna/getMrna.do?gene=57477&matureName=hsa-miR-105*&organism=9606
hsa-miR-105-3p	MIMAT0004516	hsa-miR-105*	29904	EEF2K	-0.33	http://www.microrna.org/microrna/getMrna.do?gene=29904&matureName=hsa-miR-105*&organism=9606
hsa-miR-105-3p	MIMAT0004516	hsa-miR-105*	8450	CUL4B	-0.1	http://www.microrna.org/microrna/getMrna.do?gene=8450&matureName=hsa-miR-105*&organism=9606
hsa-miR-105-3p	MIMAT0004516	hsa-miR-105*	100289017	MOXD2	-0.39	http://www.microrna.org/microrna/getMrna.do?gene=100289017&matureName=hsa-miR-105*&organism=9606
hsa-miR-105-3p	MIMAT0004516	hsa-miR-105*	1271	CNTFR	-0.87	http://www.microrna.org/microrna/getMrna.do?gene=1271&matureName=hsa-miR-105*&organism=9606
hsa-miR-105-3p	MIMAT0004516	hsa-miR-105*	127933	UHMK1	-0.85	http://www.microrna.org/microrna/getMrna.do?gene=127933&matureName=hsa-miR-105*&organism=9606
hsa-miR-105-3p	MIMAT0004516	hsa-miR-105*	56475	RPRM	-0.5	http://www.microrna.org/microrna/getMrna.do?gene=56475&matureName=hsa-miR-105*&organism=9606
hsa-miR-105-3p	MIMAT0004516	hsa-miR-105*	23199	KIAA0182	-0.17	http://www.microrna.org/microrna/getMrna.do?gene=23199&matureName=hsa-miR-105*&organism=9606
hsa-miR-105-3p	MIMAT0004516	hsa-miR-105*	3184	HNRNPD	-0.38	http://www.microrna.org/microrna/getMrna.do?gene=3184&matureName=hsa-miR-105*&organism=9606
hsa-miR-105-3p	MIMAT0004516	hsa-miR-105*	32	ACACB	-0.14	http://www.microrna.org/microrna/getMrna.do?gene=32&matureName=hsa-miR-105*&organism=9606
hsa-miR-105-3p	MIMAT0004516	hsa-miR-105*	414241	FAM35B	-0.53	http://www.microrna.org/microrna/getMrna.do?gene=414241&matureName=hsa-miR-105*&organism=9606
hsa-miR-105-3p	MIMAT0004516	hsa-miR-105*	7332	UBE2L3	-0.13	http://www.microrna.org/microrna/getMrna.do?gene=7332&matureName=hsa-miR-105*&organism=9606
hsa-miR-105-3p	MIMAT0004516	hsa-miR-105*	83445	GSG1	-0.54	http://www.microrna.org/microrna/getMrna.do?gene=83445&matureName=hsa-miR-105*&organism=9606
hsa-miR-105-3p	MIMAT0004516	hsa-miR-105*	57799	RAB40C	-0.19	http://www.microrna.org/microrna/getMrna.do?gene=57799&matureName=hsa-miR-105*&organism=9606
hsa-miR-105-3p	MIMAT0004516	hsa-miR-105*	89876	C3orf15	-0.21	http://www.microrna.org/microrna/getMrna.do?gene=89876&matureName=hsa-miR-105*&organism=9606
hsa-miR-105-3p	MIMAT0004516	hsa-miR-105*	79929	MAP6D1	-0.13	http://www.microrna.org/microrna/getMrna.do?gene=79929&matureName=hsa-miR-105*&organism=9606
hsa-miR-105-3p	MIMAT0004516	hsa-miR-105*	64708	COPS7B	-0.39	http://www.microrna.org/microrna/getMrna.do?gene=64708&matureName=hsa-miR-105*&organism=9606
hsa-miR-105-3p	MIMAT0004516	hsa-miR-105*	1863	DYT3	-0.77	http://www.microrna.org/microrna/getMrna.do?gene=1863&matureName=hsa-miR-105*&organism=9606
hsa-miR-105-3p	MIMAT0004516	hsa-miR-105*	53938	PPIL3	-1.2	http://www.microrna.org/microrna/getMrna.do?gene=53938&matureName=hsa-miR-105*&organism=9606
hsa-miR-105-3p	MIMAT0004516	hsa-miR-105*	1891	ECH1	-0.21	http://www.microrna.org/microrna/getMrna.do?gene=1891&matureName=hsa-miR-105*&organism=9606
hsa-miR-105-3p	MIMAT0004516	hsa-miR-105*	4745	NELL1	-0.84	http://www.microrna.org/microrna/getMrna.do?gene=4745&matureName=hsa-miR-105*&organism=9606
hsa-miR-105-3p	MIMAT0004516	hsa-miR-105*	80731	THSD7B	-0.39	http://www.microrna.org/microrna/getMrna.do?gene=80731&matureName=hsa-miR-105*&organism=9606
hsa-miR-105-3p	MIMAT0004516	hsa-miR-105*	144193	AMDHD1	-0.2	http://www.microrna.org/microrna/getMrna.do?gene=144193&matureName=hsa-miR-105*&organism=9606
hsa-miR-105-3p	MIMAT0004516	hsa-miR-105*	51645	PPIL1	-0.2	http://www.microrna.org/microrna/getMrna.do?gene=51645&matureName=hsa-miR-105*&organism=9606
hsa-miR-105-3p	MIMAT0004516	hsa-miR-105*	3091	HIF1A	-0.35	http://www.microrna.org/microrna/getMrna.do?gene=3091&matureName=hsa-miR-105*&organism=9606
hsa-miR-105-3p	MIMAT0004516	hsa-miR-105*	150709	ANKAR	-0.24	http://www.microrna.org/microrna/getMrna.do?gene=150709&matureName=hsa-miR-105*&organism=9606
hsa-miR-105-3p	MIMAT0004516	hsa-miR-105*	122622	ADSSL1	-0.46	http://www.microrna.org/microrna/getMrna.do?gene=122622&matureName=hsa-miR-105*&organism=9606
hsa-miR-105-3p	MIMAT0004516	hsa-miR-105*	7643	ZNF90	-0.11	http://www.microrna.org/microrna/getMrna.do?gene=7643&matureName=hsa-miR-105*&organism=9606
hsa-miR-105-3p	MIMAT0004516	hsa-miR-105*	25836	NIPBL	-0.11	http://www.microrna.org/microrna/getMrna.do?gene=25836&matureName=hsa-miR-105*&organism=9606
hsa-miR-105-3p	MIMAT0004516	hsa-miR-105*	284021	C17orf60	-0.23	http://www.microrna.org/microrna/getMrna.do?gene=284021&matureName=hsa-miR-105*&organism=9606
hsa-miR-105-3p	MIMAT0004516	hsa-miR-105*	85403	EAF1	-0.19	http://www.microrna.org/microrna/getMrna.do?gene=85403&matureName=hsa-miR-105*&organism=9606
hsa-miR-105-3p	MIMAT0004516	hsa-miR-105*	5093	PCBP1	-0.3	http://www.microrna.org/microrna/getMrna.do?gene=5093&matureName=hsa-miR-105*&organism=9606
hsa-miR-105-3p	MIMAT0004516	hsa-miR-105*	255926	ADAM5P	-0.63	http://www.microrna.org/microrna/getMrna.do?gene=255926&matureName=hsa-miR-105*&organism=9606
hsa-miR-105-3p	MIMAT0004516	hsa-miR-105*	7321	UBE2D1	-0.14	http://www.microrna.org/microrna/getMrna.do?gene=7321&matureName=hsa-miR-105*&organism=9606
hsa-miR-105-3p	MIMAT0004516	hsa-miR-105*	7643	ZNF90	-0.13	http://www.microrna.org/microrna/getMrna.do?gene=7643&matureName=hsa-miR-105*&organism=9606
hsa-miR-105-3p	MIMAT0004516	hsa-miR-105*	752	FMNL1	-0.15	http://www.microrna.org/microrna/getMrna.do?gene=752&matureName=hsa-miR-105*&organism=9606
hsa-miR-105-3p	MIMAT0004516	hsa-miR-105*	114883	OSBPL9	-0.27	http://www.microrna.org/microrna/getMrna.do?gene=114883&matureName=hsa-miR-105*&organism=9606
hsa-miR-105-3p	MIMAT0004516	hsa-miR-105*	57621	ZBTB2	-0.21	http://www.microrna.org/microrna/getMrna.do?gene=57621&matureName=hsa-miR-105*&organism=9606
hsa-miR-105-3p	MIMAT0004516	hsa-miR-105*	5723	PSPH	-0.16	http://www.microrna.org/microrna/getMrna.do?gene=5723&matureName=hsa-miR-105*&organism=9606
hsa-miR-105-3p	MIMAT0004516	hsa-miR-105*	473	RERE	-0.1	http://www.microrna.org/microrna/getMrna.do?gene=473&matureName=hsa-miR-105*&organism=9606
hsa-miR-105-3p	MIMAT0004516	hsa-miR-105*	7224	TRPC5	-0.13	http://www.microrna.org/microrna/getMrna.do?gene=7224&matureName=hsa-miR-105*&organism=9606
hsa-miR-105-3p	MIMAT0004516	hsa-miR-105*	5868	RAB5A	-0.87	http://www.microrna.org/microrna/getMrna.do?gene=5868&matureName=hsa-miR-105*&organism=9606
hsa-miR-105-3p	MIMAT0004516	hsa-miR-105*	1863	DYT3	-0.63	http://www.microrna.org/microrna/getMrna.do?gene=1863&matureName=hsa-miR-105*&organism=9606
hsa-miR-105-3p	MIMAT0004516	hsa-miR-105*	123263	MTFMT	-0.23	http://www.microrna.org/microrna/getMrna.do?gene=123263&matureName=hsa-miR-105*&organism=9606
hsa-miR-105-3p	MIMAT0004516	hsa-miR-105*	55320	C14orf106	-0.11	http://www.microrna.org/microrna/getMrna.do?gene=55320&matureName=hsa-miR-105*&organism=9606
hsa-miR-105-3p	MIMAT0004516	hsa-miR-105*	375248	ANKRD36	-0.13	http://www.microrna.org/microrna/getMrna.do?gene=375248&matureName=hsa-miR-105*&organism=9606
hsa-miR-105-3p	MIMAT0004516	hsa-miR-105*	3159	HMGA1	-0.55	http://www.microrna.org/microrna/getMrna.do?gene=3159&matureName=hsa-miR-105*&organism=9606
hsa-miR-105-3p	MIMAT0004516	hsa-miR-105*	271	AMPD2	-0.41	http://www.microrna.org/microrna/getMrna.do?gene=271&matureName=hsa-miR-105*&organism=9606
hsa-miR-105-3p	MIMAT0004516	hsa-miR-105*	192111	PGAM5	-0.1	http://www.microrna.org/microrna/getMrna.do?gene=192111&matureName=hsa-miR-105*&organism=9606
hsa-miR-105-3p	MIMAT0004516	hsa-miR-105*	10393	ANAPC10	-0.15	http://www.microrna.org/microrna/getMrna.do?gene=10393&matureName=hsa-miR-105*&organism=9606
hsa-miR-105-3p	MIMAT0004516	hsa-miR-105*	26057	ANKRD17	-0.11	http://www.microrna.org/microrna/getMrna.do?gene=26057&matureName=hsa-miR-105*&organism=9606
hsa-miR-105-3p	MIMAT0004516	hsa-miR-105*	4887	NPY2R	-0.9	http://www.microrna.org/microrna/getMrna.do?gene=4887&matureName=hsa-miR-105*&organism=9606
hsa-miR-105-3p	MIMAT0004516	hsa-miR-105*	10160	FARP1	-0.33	http://www.microrna.org/microrna/getMrna.do?gene=10160&matureName=hsa-miR-105*&organism=9606
hsa-miR-105-3p	MIMAT0004516	hsa-miR-105*	10242	KCNMB2	-0.17	http://www.microrna.org/microrna/getMrna.do?gene=10242&matureName=hsa-miR-105*&organism=9606
hsa-miR-105-3p	MIMAT0004516	hsa-miR-105*	11171	STRAP	-0.52	http://www.microrna.org/microrna/getMrna.do?gene=11171&matureName=hsa-miR-105*&organism=9606
hsa-miR-105-3p	MIMAT0004516	hsa-miR-105*	4939	OAS2	-0.12	http://www.microrna.org/microrna/getMrna.do?gene=4939&matureName=hsa-miR-105*&organism=9606
hsa-miR-105-3p	MIMAT0004516	hsa-miR-105*	10057	ABCC5	-0.2	http://www.microrna.org/microrna/getMrna.do?gene=10057&matureName=hsa-miR-105*&organism=9606
hsa-miR-105-3p	MIMAT0004516	hsa-miR-105*	85461	TANC1	-0.77	http://www.microrna.org/microrna/getMrna.do?gene=85461&matureName=hsa-miR-105*&organism=9606
hsa-miR-105-3p	MIMAT0004516	hsa-miR-105*	51207	DUSP13	-0.94	http://www.microrna.org/microrna/getMrna.do?gene=51207&matureName=hsa-miR-105*&organism=9606
hsa-miR-105-3p	MIMAT0004516	hsa-miR-105*	3159	HMGA1	-0.34	http://www.microrna.org/microrna/getMrna.do?gene=3159&matureName=hsa-miR-105*&organism=9606
hsa-miR-105-3p	MIMAT0004516	hsa-miR-105*	57396	CLK4	-0.59	http://www.microrna.org/microrna/getMrna.do?gene=57396&matureName=hsa-miR-105*&organism=9606
hsa-miR-105-3p	MIMAT0004516	hsa-miR-105*	55188	RIC8B	-0.3	http://www.microrna.org/microrna/getMrna.do?gene=55188&matureName=hsa-miR-105*&organism=9606
hsa-miR-105-3p	MIMAT0004516	hsa-miR-105*	140849	C20orf69	-0.1	http://www.microrna.org/microrna/getMrna.do?gene=140849&matureName=hsa-miR-105*&organism=9606
hsa-miR-105-3p	MIMAT0004516	hsa-miR-105*	51348	KLRF1	-0.31	http://www.microrna.org/microrna/getMrna.do?gene=51348&matureName=hsa-miR-105*&organism=9606
hsa-miR-105-3p	MIMAT0004516	hsa-miR-105*	200726	LOC200726	-0.15	http://www.microrna.org/microrna/getMrna.do?gene=200726&matureName=hsa-miR-105*&organism=9606
hsa-miR-105-3p	MIMAT0004516	hsa-miR-105*	64127	NOD2	-0.21	http://www.microrna.org/microrna/getMrna.do?gene=64127&matureName=hsa-miR-105*&organism=9606
hsa-miR-105-3p	MIMAT0004516	hsa-miR-105*	22909	MTMR15	-0.21	http://www.microrna.org/microrna/getMrna.do?gene=22909&matureName=hsa-miR-105*&organism=9606
hsa-miR-105-3p	MIMAT0004516	hsa-miR-105*	2917	GRM7	-0.75	http://www.microrna.org/microrna/getMrna.do?gene=2917&matureName=hsa-miR-105*&organism=9606
hsa-miR-105-3p	MIMAT0004516	hsa-miR-105*	84905	ZNF341	-0.15	http://www.microrna.org/microrna/getMrna.do?gene=84905&matureName=hsa-miR-105*&organism=9606
hsa-miR-105-3p	MIMAT0004516	hsa-miR-105*	2912	GRM2	-0.1	http://www.microrna.org/microrna/getMrna.do?gene=2912&matureName=hsa-miR-105*&organism=9606
hsa-miR-105-3p	MIMAT0004516	hsa-miR-105*	90321	ZNF766	-0.93	http://www.microrna.org/microrna/getMrna.do?gene=90321&matureName=hsa-miR-105*&organism=9606
hsa-miR-105-3p	MIMAT0004516	hsa-miR-105*	4129	MAOB	-0.12	http://www.microrna.org/microrna/getMrna.do?gene=4129&matureName=hsa-miR-105*&organism=9606
hsa-miR-105-3p	MIMAT0004516	hsa-miR-105*	2892	GRIA3	-0.92	http://www.microrna.org/microrna/getMrna.do?gene=2892&matureName=hsa-miR-105*&organism=9606
hsa-miR-105-3p	MIMAT0004516	hsa-miR-105*	5077	PAX3	-0.11	http://www.microrna.org/microrna/getMrna.do?gene=5077&matureName=hsa-miR-105*&organism=9606
hsa-miR-105-3p	MIMAT0004516	hsa-miR-105*	9961	MVP	-0.38	http://www.microrna.org/microrna/getMrna.do?gene=9961&matureName=hsa-miR-105*&organism=9606
hsa-miR-105-3p	MIMAT0004516	hsa-miR-105*	53358	SHC3	-0.26	http://www.microrna.org/microrna/getMrna.do?gene=53358&matureName=hsa-miR-105*&organism=9606
hsa-miR-105-3p	MIMAT0004516	hsa-miR-105*	11243	PMF1	-0.61	http://www.microrna.org/microrna/getMrna.do?gene=11243&matureName=hsa-miR-105*&organism=9606
hsa-miR-105-3p	MIMAT0004516	hsa-miR-105*	6913	TBX15	-0.46	http://www.microrna.org/microrna/getMrna.do?gene=6913&matureName=hsa-miR-105*&organism=9606
hsa-miR-105-3p	MIMAT0004516	hsa-miR-105*	126393	HSPB6	-0.19	http://www.microrna.org/microrna/getMrna.do?gene=126393&matureName=hsa-miR-105*&organism=9606
hsa-miR-105-3p	MIMAT0004516	hsa-miR-105*	5077	PAX3	-0.1	http://www.microrna.org/microrna/getMrna.do?gene=5077&matureName=hsa-miR-105*&organism=9606
hsa-miR-105-3p	MIMAT0004516	hsa-miR-105*	23090	ZNF423	-0.34	http://www.microrna.org/microrna/getMrna.do?gene=23090&matureName=hsa-miR-105*&organism=9606
hsa-miR-105-3p	MIMAT0004516	hsa-miR-105*	10209	EIF1	-0.28	http://www.microrna.org/microrna/getMrna.do?gene=10209&matureName=hsa-miR-105*&organism=9606
hsa-miR-105-3p	MIMAT0004516	hsa-miR-105*	152742	LOC152742	-0.11	http://www.microrna.org/microrna/getMrna.do?gene=152742&matureName=hsa-miR-105*&organism=9606
hsa-miR-105-3p	MIMAT0004516	hsa-miR-105*	64446	DNAI2	-0.22	http://www.microrna.org/microrna/getMrna.do?gene=64446&matureName=hsa-miR-105*&organism=9606
hsa-miR-105-3p	MIMAT0004516	hsa-miR-105*	3775	KCNK1	-0.11	http://www.microrna.org/microrna/getMrna.do?gene=3775&matureName=hsa-miR-105*&organism=9606
hsa-miR-105-3p	MIMAT0004516	hsa-miR-105*	56252	YLPM1	-0.11	http://www.microrna.org/microrna/getMrna.do?gene=56252&matureName=hsa-miR-105*&organism=9606
hsa-miR-105-3p	MIMAT0004516	hsa-miR-105*	9083	BPY2	-0.2	http://www.microrna.org/microrna/getMrna.do?gene=9083&matureName=hsa-miR-105*&organism=9606
hsa-miR-105-3p	MIMAT0004516	hsa-miR-105*	55006	TRMT61B	-0.21	http://www.microrna.org/microrna/getMrna.do?gene=55006&matureName=hsa-miR-105*&organism=9606
hsa-miR-105-3p	MIMAT0004516	hsa-miR-105*	23304	UBR2	-0.31	http://www.microrna.org/microrna/getMrna.do?gene=23304&matureName=hsa-miR-105*&organism=9606
hsa-miR-105-3p	MIMAT0004516	hsa-miR-105*	57561	ARRDC3	-0.41	http://www.microrna.org/microrna/getMrna.do?gene=57561&matureName=hsa-miR-105*&organism=9606
hsa-miR-105-3p	MIMAT0004516	hsa-miR-105*	79188	TMEM43	-0.39	http://www.microrna.org/microrna/getMrna.do?gene=79188&matureName=hsa-miR-105*&organism=9606
hsa-miR-105-3p	MIMAT0004516	hsa-miR-105*	5897	RAG2	-0.11	http://www.microrna.org/microrna/getMrna.do?gene=5897&matureName=hsa-miR-105*&organism=9606
hsa-miR-105-3p	MIMAT0004516	hsa-miR-105*	4068	SH2D1A	-1.03	http://www.microrna.org/microrna/getMrna.do?gene=4068&matureName=hsa-miR-105*&organism=9606
hsa-miR-105-3p	MIMAT0004516	hsa-miR-105*	55259	CASC1	-1.14	http://www.microrna.org/microrna/getMrna.do?gene=55259&matureName=hsa-miR-105*&organism=9606
hsa-miR-105-3p	MIMAT0004516	hsa-miR-105*	25998	IBTK	-0.1	http://www.microrna.org/microrna/getMrna.do?gene=25998&matureName=hsa-miR-105*&organism=9606
hsa-miR-105-3p	MIMAT0004516	hsa-miR-105*	83444	INO80B	-1.03	http://www.microrna.org/microrna/getMrna.do?gene=83444&matureName=hsa-miR-105*&organism=9606
hsa-miR-105-3p	MIMAT0004516	hsa-miR-105*	1605	DAG1	-0.51	http://www.microrna.org/microrna/getMrna.do?gene=1605&matureName=hsa-miR-105*&organism=9606
hsa-miR-105-3p	MIMAT0004516	hsa-miR-105*	5170	PDPK1	-0.1	http://www.microrna.org/microrna/getMrna.do?gene=5170&matureName=hsa-miR-105*&organism=9606
hsa-miR-105-3p	MIMAT0004516	hsa-miR-105*	11069	RAPGEF4	-0.12	http://www.microrna.org/microrna/getMrna.do?gene=11069&matureName=hsa-miR-105*&organism=9606
hsa-miR-105-3p	MIMAT0004516	hsa-miR-105*	11009	IL24	-0.63	http://www.microrna.org/microrna/getMrna.do?gene=11009&matureName=hsa-miR-105*&organism=9606
hsa-miR-105-3p	MIMAT0004516	hsa-miR-105*	9792	SERTAD2	-0.89	http://www.microrna.org/microrna/getMrna.do?gene=9792&matureName=hsa-miR-105*&organism=9606
hsa-miR-105-3p	MIMAT0004516	hsa-miR-105*	9792	SERTAD2	-0.85	http://www.microrna.org/microrna/getMrna.do?gene=9792&matureName=hsa-miR-105*&organism=9606
hsa-miR-105-3p	MIMAT0004516	hsa-miR-105*	8874	ARHGEF7	-0.11	http://www.microrna.org/microrna/getMrna.do?gene=8874&matureName=hsa-miR-105*&organism=9606
hsa-miR-105-3p	MIMAT0004516	hsa-miR-105*	51348	KLRF1	-0.26	http://www.microrna.org/microrna/getMrna.do?gene=51348&matureName=hsa-miR-105*&organism=9606
hsa-miR-105-3p	MIMAT0004516	hsa-miR-105*	127933	UHMK1	-0.82	http://www.microrna.org/microrna/getMrna.do?gene=127933&matureName=hsa-miR-105*&organism=9606
hsa-miR-105-3p	MIMAT0004516	hsa-miR-105*	10498	CARM1	-0.14	http://www.microrna.org/microrna/getMrna.do?gene=10498&matureName=hsa-miR-105*&organism=9606
hsa-miR-105-3p	MIMAT0004516	hsa-miR-105*	7205	TRIP6	-0.32	http://www.microrna.org/microrna/getMrna.do?gene=7205&matureName=hsa-miR-105*&organism=9606
hsa-miR-105-3p	MIMAT0004516	hsa-miR-105*	83473	KATNAL2	-0.12	http://www.microrna.org/microrna/getMrna.do?gene=83473&matureName=hsa-miR-105*&organism=9606
hsa-miR-105-3p	MIMAT0004516	hsa-miR-105*	148229	ATP8B3	-0.43	http://www.microrna.org/microrna/getMrna.do?gene=148229&matureName=hsa-miR-105*&organism=9606
hsa-miR-105-3p	MIMAT0004516	hsa-miR-105*	158135	TTLL11	-0.24	http://www.microrna.org/microrna/getMrna.do?gene=158135&matureName=hsa-miR-105*&organism=9606
hsa-miR-105-3p	MIMAT0004516	hsa-miR-105*	284565	NBPF15	-0.21	http://www.microrna.org/microrna/getMrna.do?gene=284565&matureName=hsa-miR-105*&organism=9606
hsa-miR-105-3p	MIMAT0004516	hsa-miR-105*	83604	TMEM47	-0.1	http://www.microrna.org/microrna/getMrna.do?gene=83604&matureName=hsa-miR-105*&organism=9606
hsa-miR-105-3p	MIMAT0004516	hsa-miR-105*	8837	CFLAR	-0.11	http://www.microrna.org/microrna/getMrna.do?gene=8837&matureName=hsa-miR-105*&organism=9606
hsa-miR-105-3p	MIMAT0004516	hsa-miR-105*	63908	NAPB	-0.34	http://www.microrna.org/microrna/getMrna.do?gene=63908&matureName=hsa-miR-105*&organism=9606
hsa-miR-105-3p	MIMAT0004516	hsa-miR-105*	64963	MRPS11	-0.18	http://www.microrna.org/microrna/getMrna.do?gene=64963&matureName=hsa-miR-105*&organism=9606
hsa-miR-105-3p	MIMAT0004516	hsa-miR-105*	79614	C5orf23	-0.34	http://www.microrna.org/microrna/getMrna.do?gene=79614&matureName=hsa-miR-105*&organism=9606
hsa-miR-105-3p	MIMAT0004516	hsa-miR-105*	285220	EPHA6	-1.01	http://www.microrna.org/microrna/getMrna.do?gene=285220&matureName=hsa-miR-105*&organism=9606
hsa-miR-105-3p	MIMAT0004516	hsa-miR-105*	7692	ZNF133	-0.17	http://www.microrna.org/microrna/getMrna.do?gene=7692&matureName=hsa-miR-105*&organism=9606
hsa-miR-105-3p	MIMAT0004516	hsa-miR-105*	387590	psiTPTE22	-0.1	http://www.microrna.org/microrna/getMrna.do?gene=387590&matureName=hsa-miR-105*&organism=9606
hsa-miR-105-3p	MIMAT0004516	hsa-miR-105*	2880	GPX5	-0.38	http://www.microrna.org/microrna/getMrna.do?gene=2880&matureName=hsa-miR-105*&organism=9606
hsa-miR-105-3p	MIMAT0004516	hsa-miR-105*	2892	GRIA3	-0.29	http://www.microrna.org/microrna/getMrna.do?gene=2892&matureName=hsa-miR-105*&organism=9606
hsa-miR-105-3p	MIMAT0004516	hsa-miR-105*	100169750	PRINS	-0.15	http://www.microrna.org/microrna/getMrna.do?gene=100169750&matureName=hsa-miR-105*&organism=9606
hsa-miR-105-3p	MIMAT0004516	hsa-miR-105*	57600	FNIP2	-0.1	http://www.microrna.org/microrna/getMrna.do?gene=57600&matureName=hsa-miR-105*&organism=9606
hsa-miR-105-3p	MIMAT0004516	hsa-miR-105*	54887	UHRF1BP1	-0.1	http://www.microrna.org/microrna/getMrna.do?gene=54887&matureName=hsa-miR-105*&organism=9606
hsa-miR-105-3p	MIMAT0004516	hsa-miR-105*	54887	UHRF1BP1	-0.59	http://www.microrna.org/microrna/getMrna.do?gene=54887&matureName=hsa-miR-105*&organism=9606
hsa-miR-105-3p	MIMAT0004516	hsa-miR-105*	56926	NCLN	-0.41	http://www.microrna.org/microrna/getMrna.do?gene=56926&matureName=hsa-miR-105*&organism=9606
hsa-miR-105-3p	MIMAT0004516	hsa-miR-105*	22871	NLGN1	-0.12	http://www.microrna.org/microrna/getMrna.do?gene=22871&matureName=hsa-miR-105*&organism=9606
hsa-miR-105-3p	MIMAT0004516	hsa-miR-105*	115106	HAUS1	-0.11	http://www.microrna.org/microrna/getMrna.do?gene=115106&matureName=hsa-miR-105*&organism=9606
hsa-miR-105-3p	MIMAT0004516	hsa-miR-105*	92104	TTC30A	-0.99	http://www.microrna.org/microrna/getMrna.do?gene=92104&matureName=hsa-miR-105*&organism=9606
hsa-miR-105-3p	MIMAT0004516	hsa-miR-105*	51144	HSD17B12	-0.88	http://www.microrna.org/microrna/getMrna.do?gene=51144&matureName=hsa-miR-105*&organism=9606
hsa-miR-105-3p	MIMAT0004516	hsa-miR-105*	3421	IDH3G	-0.28	http://www.microrna.org/microrna/getMrna.do?gene=3421&matureName=hsa-miR-105*&organism=9606
hsa-miR-105-3p	MIMAT0004516	hsa-miR-105*	9083	BPY2	-0.2	http://www.microrna.org/microrna/getMrna.do?gene=9083&matureName=hsa-miR-105*&organism=9606
hsa-miR-105-3p	MIMAT0004516	hsa-miR-105*	221883	HOXA11AS	-0.31	http://www.microrna.org/microrna/getMrna.do?gene=221883&matureName=hsa-miR-105*&organism=9606
hsa-miR-105-3p	MIMAT0004516	hsa-miR-105*	54221	SNTG2	-0.25	http://www.microrna.org/microrna/getMrna.do?gene=54221&matureName=hsa-miR-105*&organism=9606
hsa-miR-105-3p	MIMAT0004516	hsa-miR-105*	401884	MGC57346	-0.29	http://www.microrna.org/microrna/getMrna.do?gene=401884&matureName=hsa-miR-105*&organism=9606
hsa-miR-105-3p	MIMAT0004516	hsa-miR-105*	8749	ADAM18	-0.1	http://www.microrna.org/microrna/getMrna.do?gene=8749&matureName=hsa-miR-105*&organism=9606
hsa-miR-105-3p	MIMAT0004516	hsa-miR-105*	9242	MSC	-0.32	http://www.microrna.org/microrna/getMrna.do?gene=9242&matureName=hsa-miR-105*&organism=9606
hsa-miR-105-3p	MIMAT0004516	hsa-miR-105*	6609	SMPD1	-0.2	http://www.microrna.org/microrna/getMrna.do?gene=6609&matureName=hsa-miR-105*&organism=9606
hsa-miR-105-3p	MIMAT0004516	hsa-miR-105*	4613	MYCN	-0.55	http://www.microrna.org/microrna/getMrna.do?gene=4613&matureName=hsa-miR-105*&organism=9606
hsa-miR-105-3p	MIMAT0004516	hsa-miR-105*	2822	GPLD1	-0.15	http://www.microrna.org/microrna/getMrna.do?gene=2822&matureName=hsa-miR-105*&organism=9606
hsa-miR-105-3p	MIMAT0004516	hsa-miR-105*	55795	PCID2	-0.16	http://www.microrna.org/microrna/getMrna.do?gene=55795&matureName=hsa-miR-105*&organism=9606
hsa-miR-105-3p	MIMAT0004516	hsa-miR-105*	10194	TSHZ1	-0.23	http://www.microrna.org/microrna/getMrna.do?gene=10194&matureName=hsa-miR-105*&organism=9606
hsa-miR-105-3p	MIMAT0004516	hsa-miR-105*	64645	HIAT1	-0.37	http://www.microrna.org/microrna/getMrna.do?gene=64645&matureName=hsa-miR-105*&organism=9606
hsa-miR-105-3p	MIMAT0004516	hsa-miR-105*	25796	PGLS	-0.27	http://www.microrna.org/microrna/getMrna.do?gene=25796&matureName=hsa-miR-105*&organism=9606
hsa-miR-105-3p	MIMAT0004516	hsa-miR-105*	114794	ELFN2	-0.25	http://www.microrna.org/microrna/getMrna.do?gene=114794&matureName=hsa-miR-105*&organism=9606
hsa-miR-105-3p	MIMAT0004516	hsa-miR-105*	9103	FCGR2C	-0.11	http://www.microrna.org/microrna/getMrna.do?gene=9103&matureName=hsa-miR-105*&organism=9606
hsa-miR-105-3p	MIMAT0004516	hsa-miR-105*	8224	SYN3	-0.68	http://www.microrna.org/microrna/getMrna.do?gene=8224&matureName=hsa-miR-105*&organism=9606
hsa-miR-105-3p	MIMAT0004516	hsa-miR-105*	8224	SYN3	-0.47	http://www.microrna.org/microrna/getMrna.do?gene=8224&matureName=hsa-miR-105*&organism=9606
hsa-miR-105-3p	MIMAT0004516	hsa-miR-105*	677832	SNORA53	-0.18	http://www.microrna.org/microrna/getMrna.do?gene=677832&matureName=hsa-miR-105*&organism=9606
hsa-miR-105-3p	MIMAT0004516	hsa-miR-105*	1801	DPH1	-0.13	http://www.microrna.org/microrna/getMrna.do?gene=1801&matureName=hsa-miR-105*&organism=9606
hsa-miR-105-3p	MIMAT0004516	hsa-miR-105*	79918	SETD6	-0.12	http://www.microrna.org/microrna/getMrna.do?gene=79918&matureName=hsa-miR-105*&organism=9606
hsa-miR-105-3p	MIMAT0004516	hsa-miR-105*	22854	NTNG1	-0.4	http://www.microrna.org/microrna/getMrna.do?gene=22854&matureName=hsa-miR-105*&organism=9606
hsa-miR-105-3p	MIMAT0004516	hsa-miR-105*	100287225	LOC100287225	-0.23	http://www.microrna.org/microrna/getMrna.do?gene=100287225&matureName=hsa-miR-105*&organism=9606
hsa-miR-105-3p	MIMAT0004516	hsa-miR-105*	5424	POLD1	-0.11	http://www.microrna.org/microrna/getMrna.do?gene=5424&matureName=hsa-miR-105*&organism=9606
hsa-miR-105-3p	MIMAT0004516	hsa-miR-105*	728215	FAM155A	-0.35	http://www.microrna.org/microrna/getMrna.do?gene=728215&matureName=hsa-miR-105*&organism=9606
hsa-miR-105-3p	MIMAT0004516	hsa-miR-105*	444	ASPH	-0.21	http://www.microrna.org/microrna/getMrna.do?gene=444&matureName=hsa-miR-105*&organism=9606
hsa-miR-105-3p	MIMAT0004516	hsa-miR-105*	373	TRIM23	-0.19	http://www.microrna.org/microrna/getMrna.do?gene=373&matureName=hsa-miR-105*&organism=9606
hsa-miR-105-3p	MIMAT0004516	hsa-miR-105*	998	CDC42	-0.37	http://www.microrna.org/microrna/getMrna.do?gene=998&matureName=hsa-miR-105*&organism=9606
hsa-miR-105-3p	MIMAT0004516	hsa-miR-105*	338809	C12orf74	-0.14	http://www.microrna.org/microrna/getMrna.do?gene=338809&matureName=hsa-miR-105*&organism=9606
hsa-miR-105-3p	MIMAT0004516	hsa-miR-105*	55109	AGGF1	-0.11	http://www.microrna.org/microrna/getMrna.do?gene=55109&matureName=hsa-miR-105*&organism=9606
hsa-miR-105-3p	MIMAT0004516	hsa-miR-105*	282996	RBM20	-0.14	http://www.microrna.org/microrna/getMrna.do?gene=282996&matureName=hsa-miR-105*&organism=9606
hsa-miR-105-3p	MIMAT0004516	hsa-miR-105*	140832	WFDC10A	-0.37	http://www.microrna.org/microrna/getMrna.do?gene=140832&matureName=hsa-miR-105*&organism=9606
hsa-miR-105-3p	MIMAT0004516	hsa-miR-105*	255025	LOC255025	-0.94	http://www.microrna.org/microrna/getMrna.do?gene=255025&matureName=hsa-miR-105*&organism=9606
hsa-miR-105-3p	MIMAT0004516	hsa-miR-105*	152687	ZNF595	-0.12	http://www.microrna.org/microrna/getMrna.do?gene=152687&matureName=hsa-miR-105*&organism=9606
hsa-miR-105-3p	MIMAT0004516	hsa-miR-105*	9156	EXO1	-0.26	http://www.microrna.org/microrna/getMrna.do?gene=9156&matureName=hsa-miR-105*&organism=9606
hsa-miR-105-3p	MIMAT0004516	hsa-miR-105*	10652	YKT6	-0.37	http://www.microrna.org/microrna/getMrna.do?gene=10652&matureName=hsa-miR-105*&organism=9606
hsa-miR-105-3p	MIMAT0004516	hsa-miR-105*	644538	LOC644538	-0.14	http://www.microrna.org/microrna/getMrna.do?gene=644538&matureName=hsa-miR-105*&organism=9606
hsa-miR-105-3p	MIMAT0004516	hsa-miR-105*	115330	GPR146	-0.11	http://www.microrna.org/microrna/getMrna.do?gene=115330&matureName=hsa-miR-105*&organism=9606
hsa-miR-105-3p	MIMAT0004516	hsa-miR-105*	115	ADCY9	-0.67	http://www.microrna.org/microrna/getMrna.do?gene=115&matureName=hsa-miR-105*&organism=9606
hsa-miR-105-3p	MIMAT0004516	hsa-miR-105*	29797	POM121L8P	-0.24	http://www.microrna.org/microrna/getMrna.do?gene=29797&matureName=hsa-miR-105*&organism=9606
hsa-miR-105-3p	MIMAT0004516	hsa-miR-105*	4689	NCF4	-0.15	http://www.microrna.org/microrna/getMrna.do?gene=4689&matureName=hsa-miR-105*&organism=9606
hsa-miR-105-3p	MIMAT0004516	hsa-miR-105*	4040	LRP6	-0.17	http://www.microrna.org/microrna/getMrna.do?gene=4040&matureName=hsa-miR-105*&organism=9606
hsa-miR-105-3p	MIMAT0004516	hsa-miR-105*	1994	ELAVL1	-0.19	http://www.microrna.org/microrna/getMrna.do?gene=1994&matureName=hsa-miR-105*&organism=9606
hsa-miR-105-3p	MIMAT0004516	hsa-miR-105*	11335	CBX3	-0.15	http://www.microrna.org/microrna/getMrna.do?gene=11335&matureName=hsa-miR-105*&organism=9606
hsa-miR-105-3p	MIMAT0004516	hsa-miR-105*	4292	MLH1	-0.12	http://www.microrna.org/microrna/getMrna.do?gene=4292&matureName=hsa-miR-105*&organism=9606
hsa-miR-105-3p	MIMAT0004516	hsa-miR-105*	2878	GPX3	-0.13	http://www.microrna.org/microrna/getMrna.do?gene=2878&matureName=hsa-miR-105*&organism=9606
hsa-miR-105-3p	MIMAT0004516	hsa-miR-105*	1642	DDB1	-0.13	http://www.microrna.org/microrna/getMrna.do?gene=1642&matureName=hsa-miR-105*&organism=9606
hsa-miR-105-3p	MIMAT0004516	hsa-miR-105*	100130418	CECR7	-0.3	http://www.microrna.org/microrna/getMrna.do?gene=100130418&matureName=hsa-miR-105*&organism=9606
hsa-miR-105-3p	MIMAT0004516	hsa-miR-105*	27304	MOCS3	-0.12	http://www.microrna.org/microrna/getMrna.do?gene=27304&matureName=hsa-miR-105*&organism=9606
hsa-miR-105-3p	MIMAT0004516	hsa-miR-105*	126549	ANKLE1	-0.25	http://www.microrna.org/microrna/getMrna.do?gene=126549&matureName=hsa-miR-105*&organism=9606
hsa-miR-105-3p	MIMAT0004516	hsa-miR-105*	28999	KLF15	-0.19	http://www.microrna.org/microrna/getMrna.do?gene=28999&matureName=hsa-miR-105*&organism=9606
hsa-miR-105-3p	MIMAT0004516	hsa-miR-105*	284254	C18orf26	-0.62	http://www.microrna.org/microrna/getMrna.do?gene=284254&matureName=hsa-miR-105*&organism=9606
hsa-miR-105-3p	MIMAT0004516	hsa-miR-105*	79925	SPEF2	-0.11	http://www.microrna.org/microrna/getMrna.do?gene=79925&matureName=hsa-miR-105*&organism=9606
hsa-miR-105-3p	MIMAT0004516	hsa-miR-105*	9912	RICH2	-0.87	http://www.microrna.org/microrna/getMrna.do?gene=9912&matureName=hsa-miR-105*&organism=9606
hsa-miR-105-3p	MIMAT0004516	hsa-miR-105*	54456	MOV10L1	-1.01	http://www.microrna.org/microrna/getMrna.do?gene=54456&matureName=hsa-miR-105*&organism=9606
hsa-miR-105-3p	MIMAT0004516	hsa-miR-105*	29994	BAZ2B	-0.3	http://www.microrna.org/microrna/getMrna.do?gene=29994&matureName=hsa-miR-105*&organism=9606
hsa-miR-105-3p	MIMAT0004516	hsa-miR-105*	283755	HERC2P3	-0.63	http://www.microrna.org/microrna/getMrna.do?gene=283755&matureName=hsa-miR-105*&organism=9606
hsa-miR-105-3p	MIMAT0004516	hsa-miR-105*	6853	SYN1	-0.35	http://www.microrna.org/microrna/getMrna.do?gene=6853&matureName=hsa-miR-105*&organism=9606
hsa-miR-105-3p	MIMAT0004516	hsa-miR-105*	55188	RIC8B	-0.23	http://www.microrna.org/microrna/getMrna.do?gene=55188&matureName=hsa-miR-105*&organism=9606
hsa-miR-105-3p	MIMAT0004516	hsa-miR-105*	285593	LOC285593	-0.14	http://www.microrna.org/microrna/getMrna.do?gene=285593&matureName=hsa-miR-105*&organism=9606
hsa-miR-105-3p	MIMAT0004516	hsa-miR-105*	131583	FAM43A	-0.27	http://www.microrna.org/microrna/getMrna.do?gene=131583&matureName=hsa-miR-105*&organism=9606
hsa-miR-105-3p	MIMAT0004516	hsa-miR-105*	4744	NEFH	-0.52	http://www.microrna.org/microrna/getMrna.do?gene=4744&matureName=hsa-miR-105*&organism=9606
hsa-miR-105-3p	MIMAT0004516	hsa-miR-105*	11085	ADAM30	-0.38	http://www.microrna.org/microrna/getMrna.do?gene=11085&matureName=hsa-miR-105*&organism=9606
hsa-miR-105-3p	MIMAT0004516	hsa-miR-105*	64127	NOD2	-0.2	http://www.microrna.org/microrna/getMrna.do?gene=64127&matureName=hsa-miR-105*&organism=9606
hsa-miR-105-3p	MIMAT0004516	hsa-miR-105*	8416	ANXA9	-0.95	http://www.microrna.org/microrna/getMrna.do?gene=8416&matureName=hsa-miR-105*&organism=9606
hsa-miR-105-3p	MIMAT0004516	hsa-miR-105*	644139	PIRT	-0.11	http://www.microrna.org/microrna/getMrna.do?gene=644139&matureName=hsa-miR-105*&organism=9606
hsa-miR-105-3p	MIMAT0004516	hsa-miR-105*	8825	LIN7A	-1.29	http://www.microrna.org/microrna/getMrna.do?gene=8825&matureName=hsa-miR-105*&organism=9606
hsa-miR-105-3p	MIMAT0004516	hsa-miR-105*	10426	TUBGCP3	-0.11	http://www.microrna.org/microrna/getMrna.do?gene=10426&matureName=hsa-miR-105*&organism=9606
hsa-miR-105-3p	MIMAT0004516	hsa-miR-105*	1510	CTSE	-0.17	http://www.microrna.org/microrna/getMrna.do?gene=1510&matureName=hsa-miR-105*&organism=9606
hsa-miR-105-3p	MIMAT0004516	hsa-miR-105*	196872	MGC23270	-0.13	http://www.microrna.org/microrna/getMrna.do?gene=196872&matureName=hsa-miR-105*&organism=9606
hsa-miR-105-3p	MIMAT0004516	hsa-miR-105*	6355	CCL8	-0.1	http://www.microrna.org/microrna/getMrna.do?gene=6355&matureName=hsa-miR-105*&organism=9606
hsa-miR-105-3p	MIMAT0004516	hsa-miR-105*	6355	CCL8	-0.21	http://www.microrna.org/microrna/getMrna.do?gene=6355&matureName=hsa-miR-105*&organism=9606
hsa-miR-105-3p	MIMAT0004516	hsa-miR-105*	26502	NARF	-0.18	http://www.microrna.org/microrna/getMrna.do?gene=26502&matureName=hsa-miR-105*&organism=9606
hsa-miR-105-3p	MIMAT0004516	hsa-miR-105*	2495	FTH1	-0.18	http://www.microrna.org/microrna/getMrna.do?gene=2495&matureName=hsa-miR-105*&organism=9606
hsa-miR-105-3p	MIMAT0004516	hsa-miR-105*	118980	SFXN2	-0.37	http://www.microrna.org/microrna/getMrna.do?gene=118980&matureName=hsa-miR-105*&organism=9606
hsa-miR-105-3p	MIMAT0004516	hsa-miR-105*	752	FMNL1	-0.16	http://www.microrna.org/microrna/getMrna.do?gene=752&matureName=hsa-miR-105*&organism=9606
hsa-miR-105-3p	MIMAT0004516	hsa-miR-105*	389765	LOC389765	-0.69	http://www.microrna.org/microrna/getMrna.do?gene=389765&matureName=hsa-miR-105*&organism=9606
hsa-miR-105-3p	MIMAT0004516	hsa-miR-105*	152742	LOC152742	-0.1	http://www.microrna.org/microrna/getMrna.do?gene=152742&matureName=hsa-miR-105*&organism=9606
hsa-miR-105-3p	MIMAT0004516	hsa-miR-105*	64601	VPS16	-0.52	http://www.microrna.org/microrna/getMrna.do?gene=64601&matureName=hsa-miR-105*&organism=9606
hsa-miR-105-3p	MIMAT0004516	hsa-miR-105*	2880	GPX5	-0.49	http://www.microrna.org/microrna/getMrna.do?gene=2880&matureName=hsa-miR-105*&organism=9606
hsa-miR-105-3p	MIMAT0004516	hsa-miR-105*	6256	RXRA	-0.12	http://www.microrna.org/microrna/getMrna.do?gene=6256&matureName=hsa-miR-105*&organism=9606
hsa-miR-105-3p	MIMAT0004516	hsa-miR-105*	23011	RAB21	-0.18	http://www.microrna.org/microrna/getMrna.do?gene=23011&matureName=hsa-miR-105*&organism=9606
hsa-miR-105-3p	MIMAT0004516	hsa-miR-105*	285220	EPHA6	-0.98	http://www.microrna.org/microrna/getMrna.do?gene=285220&matureName=hsa-miR-105*&organism=9606
hsa-miR-105-3p	MIMAT0004516	hsa-miR-105*	440184	C14orf53	-0.18	http://www.microrna.org/microrna/getMrna.do?gene=440184&matureName=hsa-miR-105*&organism=9606
hsa-miR-105-3p	MIMAT0004516	hsa-miR-105*	26155	NOC2L	-0.13	http://www.microrna.org/microrna/getMrna.do?gene=26155&matureName=hsa-miR-105*&organism=9606
hsa-miR-105-3p	MIMAT0004516	hsa-miR-105*	223082	ZNRF2	-0.1	http://www.microrna.org/microrna/getMrna.do?gene=223082&matureName=hsa-miR-105*&organism=9606
hsa-miR-105-3p	MIMAT0004516	hsa-miR-105*	115908	CTHRC1	-0.11	http://www.microrna.org/microrna/getMrna.do?gene=115908&matureName=hsa-miR-105*&organism=9606
hsa-miR-105-3p	MIMAT0004516	hsa-miR-105*	56243	KIAA1217	-0.3	http://www.microrna.org/microrna/getMrna.do?gene=56243&matureName=hsa-miR-105*&organism=9606
hsa-miR-105-3p	MIMAT0004516	hsa-miR-105*	10641	NPRL2	-0.12	http://www.microrna.org/microrna/getMrna.do?gene=10641&matureName=hsa-miR-105*&organism=9606
hsa-miR-105-3p	MIMAT0004516	hsa-miR-105*	255025	LOC255025	-0.86	http://www.microrna.org/microrna/getMrna.do?gene=255025&matureName=hsa-miR-105*&organism=9606
hsa-miR-105-3p	MIMAT0004516	hsa-miR-105*	54762	GRAMD1C	-0.17	http://www.microrna.org/microrna/getMrna.do?gene=54762&matureName=hsa-miR-105*&organism=9606
hsa-miR-105-3p	MIMAT0004516	hsa-miR-105*	26223	FBXL21	-0.11	http://www.microrna.org/microrna/getMrna.do?gene=26223&matureName=hsa-miR-105*&organism=9606
hsa-miR-105-3p	MIMAT0004516	hsa-miR-105*	4322	MMP13	-0.11	http://www.microrna.org/microrna/getMrna.do?gene=4322&matureName=hsa-miR-105*&organism=9606
hsa-miR-105-3p	MIMAT0004516	hsa-miR-105*	79818	ZNF552	-0.15	http://www.microrna.org/microrna/getMrna.do?gene=79818&matureName=hsa-miR-105*&organism=9606
hsa-miR-105-3p	MIMAT0004516	hsa-miR-105*	5787	PTPRB	-0.18	http://www.microrna.org/microrna/getMrna.do?gene=5787&matureName=hsa-miR-105*&organism=9606
hsa-miR-105-3p	MIMAT0004516	hsa-miR-105*	196415	C12orf77	-0.49	http://www.microrna.org/microrna/getMrna.do?gene=196415&matureName=hsa-miR-105*&organism=9606
hsa-miR-105-3p	MIMAT0004516	hsa-miR-105*	64434	NOM1	-0.46	http://www.microrna.org/microrna/getMrna.do?gene=64434&matureName=hsa-miR-105*&organism=9606
hsa-miR-105-3p	MIMAT0004516	hsa-miR-105*	127002	ATXN7L2	-0.39	http://www.microrna.org/microrna/getMrna.do?gene=127002&matureName=hsa-miR-105*&organism=9606
hsa-miR-105-3p	MIMAT0004516	hsa-miR-105*	57510	XPO5	-0.17	http://www.microrna.org/microrna/getMrna.do?gene=57510&matureName=hsa-miR-105*&organism=9606
hsa-miR-105-3p	MIMAT0004516	hsa-miR-105*	56926	NCLN	-0.12	http://www.microrna.org/microrna/getMrna.do?gene=56926&matureName=hsa-miR-105*&organism=9606
hsa-miR-105-3p	MIMAT0004516	hsa-miR-105*	373	TRIM23	-0.23	http://www.microrna.org/microrna/getMrna.do?gene=373&matureName=hsa-miR-105*&organism=9606
hsa-miR-105-3p	MIMAT0004516	hsa-miR-105*	56952	PRTFDC1	-0.85	http://www.microrna.org/microrna/getMrna.do?gene=56952&matureName=hsa-miR-105*&organism=9606
hsa-miR-105-3p	MIMAT0004516	hsa-miR-105*	11194	ABCB8	-1.03	http://www.microrna.org/microrna/getMrna.do?gene=11194&matureName=hsa-miR-105*&organism=9606
hsa-miR-105-3p	MIMAT0004516	hsa-miR-105*	283788	LOC283788	-0.34	http://www.microrna.org/microrna/getMrna.do?gene=283788&matureName=hsa-miR-105*&organism=9606
hsa-miR-105-3p	MIMAT0004516	hsa-miR-105*	27437	HSFYL1	-0.54	http://www.microrna.org/microrna/getMrna.do?gene=27437&matureName=hsa-miR-105*&organism=9606
hsa-miR-105-3p	MIMAT0004516	hsa-miR-105*	153218	SPINK13	-0.1	http://www.microrna.org/microrna/getMrna.do?gene=153218&matureName=hsa-miR-105*&organism=9606
hsa-miR-105-3p	MIMAT0004516	hsa-miR-105*	441455	LOC441455	-0.2	http://www.microrna.org/microrna/getMrna.do?gene=441455&matureName=hsa-miR-105*&organism=9606
hsa-miR-105-3p	MIMAT0004516	hsa-miR-105*	79365	BHLHE41	-0.26	http://www.microrna.org/microrna/getMrna.do?gene=79365&matureName=hsa-miR-105*&organism=9606
hsa-miR-105-3p	MIMAT0004516	hsa-miR-105*	57536	KIAA1328	-0.4	http://www.microrna.org/microrna/getMrna.do?gene=57536&matureName=hsa-miR-105*&organism=9606
hsa-miR-105-3p	MIMAT0004516	hsa-miR-105*	2671	GFER	-0.13	http://www.microrna.org/microrna/getMrna.do?gene=2671&matureName=hsa-miR-105*&organism=9606
hsa-miR-105-3p	MIMAT0004516	hsa-miR-105*	672	BRCA1	-0.22	http://www.microrna.org/microrna/getMrna.do?gene=672&matureName=hsa-miR-105*&organism=9606
hsa-miR-105-3p	MIMAT0004516	hsa-miR-105*	6625	SNRNP70	-0.14	http://www.microrna.org/microrna/getMrna.do?gene=6625&matureName=hsa-miR-105*&organism=9606
hsa-miR-105-3p	MIMAT0004516	hsa-miR-105*	10048	RANBP9	-1.29	http://www.microrna.org/microrna/getMrna.do?gene=10048&matureName=hsa-miR-105*&organism=9606
hsa-miR-105-3p	MIMAT0004516	hsa-miR-105*	84680	ACCS	-0.23	http://www.microrna.org/microrna/getMrna.do?gene=84680&matureName=hsa-miR-105*&organism=9606
hsa-miR-105-3p	MIMAT0004516	hsa-miR-105*	9945	GFPT2	-0.12	http://www.microrna.org/microrna/getMrna.do?gene=9945&matureName=hsa-miR-105*&organism=9606
hsa-miR-105-3p	MIMAT0004516	hsa-miR-105*	10250	SRRM1	-0.69	http://www.microrna.org/microrna/getMrna.do?gene=10250&matureName=hsa-miR-105*&organism=9606
hsa-miR-105-3p	MIMAT0004516	hsa-miR-105*	55832	CAND1	-0.18	http://www.microrna.org/microrna/getMrna.do?gene=55832&matureName=hsa-miR-105*&organism=9606
hsa-miR-105-3p	MIMAT0004516	hsa-miR-105*	6950	TCP1	-0.47	http://www.microrna.org/microrna/getMrna.do?gene=6950&matureName=hsa-miR-105*&organism=9606
hsa-miR-105-3p	MIMAT0004516	hsa-miR-105*	7089	TLE2	-0.36	http://www.microrna.org/microrna/getMrna.do?gene=7089&matureName=hsa-miR-105*&organism=9606
hsa-miR-105-3p	MIMAT0004516	hsa-miR-105*	138428	PTRH1	-0.32	http://www.microrna.org/microrna/getMrna.do?gene=138428&matureName=hsa-miR-105*&organism=9606
hsa-miR-105-3p	MIMAT0004516	hsa-miR-105*	93166	PRDM6	-0.55	http://www.microrna.org/microrna/getMrna.do?gene=93166&matureName=hsa-miR-105*&organism=9606
hsa-miR-105-3p	MIMAT0004516	hsa-miR-105*	374462	PTPRQ	-0.2	http://www.microrna.org/microrna/getMrna.do?gene=374462&matureName=hsa-miR-105*&organism=9606
hsa-miR-105-3p	MIMAT0004516	hsa-miR-105*	51497	TH1L	-1.01	http://www.microrna.org/microrna/getMrna.do?gene=51497&matureName=hsa-miR-105*&organism=9606
hsa-miR-105-3p	MIMAT0004516	hsa-miR-105*	117245	HRASLS5	-0.15	http://www.microrna.org/microrna/getMrna.do?gene=117245&matureName=hsa-miR-105*&organism=9606
hsa-miR-105-3p	MIMAT0004516	hsa-miR-105*	11009	IL24	-0.28	http://www.microrna.org/microrna/getMrna.do?gene=11009&matureName=hsa-miR-105*&organism=9606
hsa-miR-105-3p	MIMAT0004516	hsa-miR-105*	54925	ZNF434	-1.04	http://www.microrna.org/microrna/getMrna.do?gene=54925&matureName=hsa-miR-105*&organism=9606
hsa-miR-105-3p	MIMAT0004516	hsa-miR-105*	83657	DYNLRB2	-0.11	http://www.microrna.org/microrna/getMrna.do?gene=83657&matureName=hsa-miR-105*&organism=9606
hsa-miR-105-3p	MIMAT0004516	hsa-miR-105*	594	BCKDHB	-0.15	http://www.microrna.org/microrna/getMrna.do?gene=594&matureName=hsa-miR-105*&organism=9606
hsa-miR-105-3p	MIMAT0004516	hsa-miR-105*	118980	SFXN2	-0.4	http://www.microrna.org/microrna/getMrna.do?gene=118980&matureName=hsa-miR-105*&organism=9606
hsa-miR-105-3p	MIMAT0004516	hsa-miR-105*	56674	TMEM9B	-0.26	http://www.microrna.org/microrna/getMrna.do?gene=56674&matureName=hsa-miR-105*&organism=9606
hsa-miR-105-3p	MIMAT0004516	hsa-miR-105*	494143	CHAC2	-0.11	http://www.microrna.org/microrna/getMrna.do?gene=494143&matureName=hsa-miR-105*&organism=9606
hsa-miR-105-3p	MIMAT0004516	hsa-miR-105*	3781	KCNN2	-0.44	http://www.microrna.org/microrna/getMrna.do?gene=3781&matureName=hsa-miR-105*&organism=9606
hsa-miR-105-3p	MIMAT0004516	hsa-miR-105*	11243	PMF1	-0.61	http://www.microrna.org/microrna/getMrna.do?gene=11243&matureName=hsa-miR-105*&organism=9606
hsa-miR-105-3p	MIMAT0004516	hsa-miR-105*	54951	COMMD8	-0.11	http://www.microrna.org/microrna/getMrna.do?gene=54951&matureName=hsa-miR-105*&organism=9606
hsa-miR-105-3p	MIMAT0004516	hsa-miR-105*	64005	MYO1G	-0.52	http://www.microrna.org/microrna/getMrna.do?gene=64005&matureName=hsa-miR-105*&organism=9606
hsa-miR-105-3p	MIMAT0004516	hsa-miR-105*	64801	ARV1	-0.13	http://www.microrna.org/microrna/getMrna.do?gene=64801&matureName=hsa-miR-105*&organism=9606
hsa-miR-105-3p	MIMAT0004516	hsa-miR-105*	6311	ATXN2	-0.31	http://www.microrna.org/microrna/getMrna.do?gene=6311&matureName=hsa-miR-105*&organism=9606
hsa-miR-105-3p	MIMAT0004516	hsa-miR-105*	136319	MTPN	-1.14	http://www.microrna.org/microrna/getMrna.do?gene=136319&matureName=hsa-miR-105*&organism=9606
hsa-miR-105-3p	MIMAT0004516	hsa-miR-105*	146880	LOC146880	-0.12	http://www.microrna.org/microrna/getMrna.do?gene=146880&matureName=hsa-miR-105*&organism=9606
hsa-miR-105-3p	MIMAT0004516	hsa-miR-105*	11335	CBX3	-0.17	http://www.microrna.org/microrna/getMrna.do?gene=11335&matureName=hsa-miR-105*&organism=9606
hsa-miR-105-3p	MIMAT0004516	hsa-miR-105*	5716	PSMD10	-0.13	http://www.microrna.org/microrna/getMrna.do?gene=5716&matureName=hsa-miR-105*&organism=9606
hsa-miR-105-3p	MIMAT0004516	hsa-miR-105*	440184	C14orf53	-0.19	http://www.microrna.org/microrna/getMrna.do?gene=440184&matureName=hsa-miR-105*&organism=9606
hsa-miR-105-3p	MIMAT0004516	hsa-miR-105*	7389	UROD	-0.96	http://www.microrna.org/microrna/getMrna.do?gene=7389&matureName=hsa-miR-105*&organism=9606
hsa-miR-105-3p	MIMAT0004516	hsa-miR-105*	55238	SLC38A7	-0.13	http://www.microrna.org/microrna/getMrna.do?gene=55238&matureName=hsa-miR-105*&organism=9606
hsa-miR-105-3p	MIMAT0004516	hsa-miR-105*	4689	NCF4	-0.13	http://www.microrna.org/microrna/getMrna.do?gene=4689&matureName=hsa-miR-105*&organism=9606
hsa-miR-105-3p	MIMAT0004516	hsa-miR-105*	56649	TMPRSS4	-0.28	http://www.microrna.org/microrna/getMrna.do?gene=56649&matureName=hsa-miR-105*&organism=9606
hsa-miR-105-3p	MIMAT0004516	hsa-miR-105*	55617	TASP1	-1.12	http://www.microrna.org/microrna/getMrna.do?gene=55617&matureName=hsa-miR-105*&organism=9606
hsa-miR-105-3p	MIMAT0004516	hsa-miR-105*	401508	FAM74A4	-0.45	http://www.microrna.org/microrna/getMrna.do?gene=401508&matureName=hsa-miR-105*&organism=9606
hsa-miR-105-3p	MIMAT0004516	hsa-miR-105*	55656	INTS8	-0.14	http://www.microrna.org/microrna/getMrna.do?gene=55656&matureName=hsa-miR-105*&organism=9606
hsa-miR-105-3p	MIMAT0004516	hsa-miR-105*	383	ARG1	-1.23	http://www.microrna.org/microrna/getMrna.do?gene=383&matureName=hsa-miR-105*&organism=9606
hsa-miR-105-3p	MIMAT0004516	hsa-miR-105*	161502	C15orf26	-0.22	http://www.microrna.org/microrna/getMrna.do?gene=161502&matureName=hsa-miR-105*&organism=9606
hsa-miR-105-3p	MIMAT0004516	hsa-miR-105*	4629	MYH11	-0.13	http://www.microrna.org/microrna/getMrna.do?gene=4629&matureName=hsa-miR-105*&organism=9606
hsa-miR-105-3p	MIMAT0004516	hsa-miR-105*	100093631	LOC100093631	-0.1	http://www.microrna.org/microrna/getMrna.do?gene=100093631&matureName=hsa-miR-105*&organism=9606
hsa-miR-105-3p	MIMAT0004516	hsa-miR-105*	122769	PPIL5	-0.17	http://www.microrna.org/microrna/getMrna.do?gene=122769&matureName=hsa-miR-105*&organism=9606
hsa-miR-105-3p	MIMAT0004516	hsa-miR-105*	3281	HSBP1	-0.33	http://www.microrna.org/microrna/getMrna.do?gene=3281&matureName=hsa-miR-105*&organism=9606
hsa-miR-105-3p	MIMAT0004516	hsa-miR-105*	1510	CTSE	-0.17	http://www.microrna.org/microrna/getMrna.do?gene=1510&matureName=hsa-miR-105*&organism=9606
hsa-miR-105-3p	MIMAT0004516	hsa-miR-105*	6092	ROBO2	-0.11	http://www.microrna.org/microrna/getMrna.do?gene=6092&matureName=hsa-miR-105*&organism=9606
hsa-miR-105-3p	MIMAT0004516	hsa-miR-105*	10518	CIB2	-0.66	http://www.microrna.org/microrna/getMrna.do?gene=10518&matureName=hsa-miR-105*&organism=9606
hsa-miR-105-3p	MIMAT0004516	hsa-miR-105*	6901	TAZ	-0.43	http://www.microrna.org/microrna/getMrna.do?gene=6901&matureName=hsa-miR-105*&organism=9606
hsa-miR-105-3p	MIMAT0004516	hsa-miR-105*	27255	CNTN6	-0.1	http://www.microrna.org/microrna/getMrna.do?gene=27255&matureName=hsa-miR-105*&organism=9606
hsa-miR-105-3p	MIMAT0004516	hsa-miR-105*	84696	ABHD1	-0.33	http://www.microrna.org/microrna/getMrna.do?gene=84696&matureName=hsa-miR-105*&organism=9606
hsa-miR-10b-3p	MIMAT0004556	hsa-miR-10b*	55884	WSB2	-0.26	http://www.microrna.org/microrna/getMrna.do?gene=55884&matureName=hsa-miR-10b*&organism=9606
hsa-miR-10b-3p	MIMAT0004556	hsa-miR-10b*	150159	NHEDC1	-1.06	http://www.microrna.org/microrna/getMrna.do?gene=150159&matureName=hsa-miR-10b*&organism=9606
hsa-miR-10b-3p	MIMAT0004556	hsa-miR-10b*	494188	FBXO47	-0.44	http://www.microrna.org/microrna/getMrna.do?gene=494188&matureName=hsa-miR-10b*&organism=9606
hsa-miR-10b-3p	MIMAT0004556	hsa-miR-10b*	50859	SPOCK3	-0.3	http://www.microrna.org/microrna/getMrna.do?gene=50859&matureName=hsa-miR-10b*&organism=9606
hsa-miR-10b-3p	MIMAT0004556	hsa-miR-10b*	26036	ZNF451	-0.14	http://www.microrna.org/microrna/getMrna.do?gene=26036&matureName=hsa-miR-10b*&organism=9606
hsa-miR-10b-3p	MIMAT0004556	hsa-miR-10b*	54843	SYTL2	-0.88	http://www.microrna.org/microrna/getMrna.do?gene=54843&matureName=hsa-miR-10b*&organism=9606
hsa-miR-10b-3p	MIMAT0004556	hsa-miR-10b*	9169	SFRS2IP	-0.22	http://www.microrna.org/microrna/getMrna.do?gene=9169&matureName=hsa-miR-10b*&organism=9606
hsa-miR-10b-3p	MIMAT0004556	hsa-miR-10b*	3805	KIR2DL4	-0.43	http://www.microrna.org/microrna/getMrna.do?gene=3805&matureName=hsa-miR-10b*&organism=9606
hsa-miR-10b-3p	MIMAT0004556	hsa-miR-10b*	4257	MGST1	-0.12	http://www.microrna.org/microrna/getMrna.do?gene=4257&matureName=hsa-miR-10b*&organism=9606
hsa-miR-10b-3p	MIMAT0004556	hsa-miR-10b*	54413	NLGN3	-0.5	http://www.microrna.org/microrna/getMrna.do?gene=54413&matureName=hsa-miR-10b*&organism=9606
hsa-miR-10b-3p	MIMAT0004556	hsa-miR-10b*	124460	SNX20	-0.13	http://www.microrna.org/microrna/getMrna.do?gene=124460&matureName=hsa-miR-10b*&organism=9606
hsa-miR-10b-3p	MIMAT0004556	hsa-miR-10b*	6815	STYX	-0.1	http://www.microrna.org/microrna/getMrna.do?gene=6815&matureName=hsa-miR-10b*&organism=9606
hsa-miR-10b-3p	MIMAT0004556	hsa-miR-10b*	6815	STYX	-0.45	http://www.microrna.org/microrna/getMrna.do?gene=6815&matureName=hsa-miR-10b*&organism=9606
hsa-miR-10b-3p	MIMAT0004556	hsa-miR-10b*	343070	PRAMEF9	-0.78	http://www.microrna.org/microrna/getMrna.do?gene=343070&matureName=hsa-miR-10b*&organism=9606
hsa-miR-10b-3p	MIMAT0004556	hsa-miR-10b*	26095	PTPN20B	-0.15	http://www.microrna.org/microrna/getMrna.do?gene=26095&matureName=hsa-miR-10b*&organism=9606
hsa-miR-10b-3p	MIMAT0004556	hsa-miR-10b*	57733	GBA3	-0.31	http://www.microrna.org/microrna/getMrna.do?gene=57733&matureName=hsa-miR-10b*&organism=9606
hsa-miR-10b-3p	MIMAT0004556	hsa-miR-10b*	54904	WHSC1L1	-0.93	http://www.microrna.org/microrna/getMrna.do?gene=54904&matureName=hsa-miR-10b*&organism=9606
hsa-miR-10b-3p	MIMAT0004556	hsa-miR-10b*	9555	H2AFY	-0.96	http://www.microrna.org/microrna/getMrna.do?gene=9555&matureName=hsa-miR-10b*&organism=9606
hsa-miR-10b-3p	MIMAT0004556	hsa-miR-10b*	51006	SLC35C2	-0.28	http://www.microrna.org/microrna/getMrna.do?gene=51006&matureName=hsa-miR-10b*&organism=9606
hsa-miR-10b-3p	MIMAT0004556	hsa-miR-10b*	23613	ZMYND8	-0.85	http://www.microrna.org/microrna/getMrna.do?gene=23613&matureName=hsa-miR-10b*&organism=9606
hsa-miR-10b-3p	MIMAT0004556	hsa-miR-10b*	9564	BCAR1	-0.41	http://www.microrna.org/microrna/getMrna.do?gene=9564&matureName=hsa-miR-10b*&organism=9606
hsa-miR-10b-3p	MIMAT0004556	hsa-miR-10b*	132	ADK	-0.18	http://www.microrna.org/microrna/getMrna.do?gene=132&matureName=hsa-miR-10b*&organism=9606
hsa-miR-10b-3p	MIMAT0004556	hsa-miR-10b*	79980	DSN1	-0.26	http://www.microrna.org/microrna/getMrna.do?gene=79980&matureName=hsa-miR-10b*&organism=9606
hsa-miR-10b-3p	MIMAT0004556	hsa-miR-10b*	81797	OR12D3	-0.16	http://www.microrna.org/microrna/getMrna.do?gene=81797&matureName=hsa-miR-10b*&organism=9606
hsa-miR-10b-3p	MIMAT0004556	hsa-miR-10b*	23279	NUP160	-1.01	http://www.microrna.org/microrna/getMrna.do?gene=23279&matureName=hsa-miR-10b*&organism=9606
hsa-miR-10b-3p	MIMAT0004556	hsa-miR-10b*	23279	NUP160	-0.17	http://www.microrna.org/microrna/getMrna.do?gene=23279&matureName=hsa-miR-10b*&organism=9606
hsa-miR-10b-3p	MIMAT0004556	hsa-miR-10b*	134526	ACOT12	-0.28	http://www.microrna.org/microrna/getMrna.do?gene=134526&matureName=hsa-miR-10b*&organism=9606
hsa-miR-10b-3p	MIMAT0004556	hsa-miR-10b*	441032	EEF1A1P9	-0.38	http://www.microrna.org/microrna/getMrna.do?gene=441032&matureName=hsa-miR-10b*&organism=9606
hsa-miR-10b-3p	MIMAT0004556	hsa-miR-10b*	23670	TMEM2	-0.21	http://www.microrna.org/microrna/getMrna.do?gene=23670&matureName=hsa-miR-10b*&organism=9606
hsa-miR-10b-3p	MIMAT0004556	hsa-miR-10b*	4223	MEOX2	-1.11	http://www.microrna.org/microrna/getMrna.do?gene=4223&matureName=hsa-miR-10b*&organism=9606
hsa-miR-10b-3p	MIMAT0004556	hsa-miR-10b*	5359	PLSCR1	-0.66	http://www.microrna.org/microrna/getMrna.do?gene=5359&matureName=hsa-miR-10b*&organism=9606
hsa-miR-10b-3p	MIMAT0004556	hsa-miR-10b*	340156	MYLK4	-0.16	http://www.microrna.org/microrna/getMrna.do?gene=340156&matureName=hsa-miR-10b*&organism=9606
hsa-miR-10b-3p	MIMAT0004556	hsa-miR-10b*	340156	MYLK4	-0.14	http://www.microrna.org/microrna/getMrna.do?gene=340156&matureName=hsa-miR-10b*&organism=9606
hsa-miR-10b-3p	MIMAT0004556	hsa-miR-10b*	3106	HLA-B	-1.29	http://www.microrna.org/microrna/getMrna.do?gene=3106&matureName=hsa-miR-10b*&organism=9606
hsa-miR-10b-3p	MIMAT0004556	hsa-miR-10b*	1974	EIF4A2	-0.15	http://www.microrna.org/microrna/getMrna.do?gene=1974&matureName=hsa-miR-10b*&organism=9606
hsa-miR-10b-3p	MIMAT0004556	hsa-miR-10b*	64981	MRPL34	-0.25	http://www.microrna.org/microrna/getMrna.do?gene=64981&matureName=hsa-miR-10b*&organism=9606
hsa-miR-10b-3p	MIMAT0004556	hsa-miR-10b*	2011	MARK2	-1.02	http://www.microrna.org/microrna/getMrna.do?gene=2011&matureName=hsa-miR-10b*&organism=9606
hsa-miR-10b-3p	MIMAT0004556	hsa-miR-10b*	55576	STAB2	-0.31	http://www.microrna.org/microrna/getMrna.do?gene=55576&matureName=hsa-miR-10b*&organism=9606
hsa-miR-10b-3p	MIMAT0004556	hsa-miR-10b*	112703	FAM71E1	-0.11	http://www.microrna.org/microrna/getMrna.do?gene=112703&matureName=hsa-miR-10b*&organism=9606
hsa-miR-10b-3p	MIMAT0004556	hsa-miR-10b*	4103	MAGEA4	-0.35	http://www.microrna.org/microrna/getMrna.do?gene=4103&matureName=hsa-miR-10b*&organism=9606
hsa-miR-10b-3p	MIMAT0004556	hsa-miR-10b*	1956	EGFR	-0.92	http://www.microrna.org/microrna/getMrna.do?gene=1956&matureName=hsa-miR-10b*&organism=9606
hsa-miR-10b-3p	MIMAT0004556	hsa-miR-10b*	9337	CNOT8	-0.67	http://www.microrna.org/microrna/getMrna.do?gene=9337&matureName=hsa-miR-10b*&organism=9606
hsa-miR-10b-3p	MIMAT0004556	hsa-miR-10b*	400629	TEX19	-0.29	http://www.microrna.org/microrna/getMrna.do?gene=400629&matureName=hsa-miR-10b*&organism=9606
hsa-miR-10b-3p	MIMAT0004556	hsa-miR-10b*	22854	NTNG1	-0.15	http://www.microrna.org/microrna/getMrna.do?gene=22854&matureName=hsa-miR-10b*&organism=9606
hsa-miR-10b-3p	MIMAT0004556	hsa-miR-10b*	23382	AHCYL2	-0.4	http://www.microrna.org/microrna/getMrna.do?gene=23382&matureName=hsa-miR-10b*&organism=9606
hsa-miR-10b-3p	MIMAT0004556	hsa-miR-10b*	23382	AHCYL2	-0.31	http://www.microrna.org/microrna/getMrna.do?gene=23382&matureName=hsa-miR-10b*&organism=9606
hsa-miR-10b-3p	MIMAT0004556	hsa-miR-10b*	23382	AHCYL2	-0.32	http://www.microrna.org/microrna/getMrna.do?gene=23382&matureName=hsa-miR-10b*&organism=9606
hsa-miR-10b-3p	MIMAT0004556	hsa-miR-10b*	11217	AKAP2	-0.26	http://www.microrna.org/microrna/getMrna.do?gene=11217&matureName=hsa-miR-10b*&organism=9606
hsa-miR-10b-3p	MIMAT0004556	hsa-miR-10b*	79931	TNIP3	-0.16	http://www.microrna.org/microrna/getMrna.do?gene=79931&matureName=hsa-miR-10b*&organism=9606
hsa-miR-10b-3p	MIMAT0004556	hsa-miR-10b*	55739	CARKD	-0.82	http://www.microrna.org/microrna/getMrna.do?gene=55739&matureName=hsa-miR-10b*&organism=9606
hsa-miR-10b-3p	MIMAT0004556	hsa-miR-10b*	128061	C1orf131	-0.14	http://www.microrna.org/microrna/getMrna.do?gene=128061&matureName=hsa-miR-10b*&organism=9606
hsa-miR-10b-3p	MIMAT0004556	hsa-miR-10b*	7170	TPM3	-0.21	http://www.microrna.org/microrna/getMrna.do?gene=7170&matureName=hsa-miR-10b*&organism=9606
hsa-miR-10b-3p	MIMAT0004556	hsa-miR-10b*	4719	NDUFS1	-0.89	http://www.microrna.org/microrna/getMrna.do?gene=4719&matureName=hsa-miR-10b*&organism=9606
hsa-miR-10b-3p	MIMAT0004556	hsa-miR-10b*	56034	PDGFC	-0.11	http://www.microrna.org/microrna/getMrna.do?gene=56034&matureName=hsa-miR-10b*&organism=9606
hsa-miR-10b-3p	MIMAT0004556	hsa-miR-10b*	11101	ATE1	-0.14	http://www.microrna.org/microrna/getMrna.do?gene=11101&matureName=hsa-miR-10b*&organism=9606
hsa-miR-10b-3p	MIMAT0004556	hsa-miR-10b*	11101	ATE1	-0.29	http://www.microrna.org/microrna/getMrna.do?gene=11101&matureName=hsa-miR-10b*&organism=9606
hsa-miR-10b-3p	MIMAT0004556	hsa-miR-10b*	92399	MRRF	-1.03	http://www.microrna.org/microrna/getMrna.do?gene=92399&matureName=hsa-miR-10b*&organism=9606
hsa-miR-10b-3p	MIMAT0004556	hsa-miR-10b*	92399	MRRF	-1.03	http://www.microrna.org/microrna/getMrna.do?gene=92399&matureName=hsa-miR-10b*&organism=9606
hsa-miR-10b-3p	MIMAT0004556	hsa-miR-10b*	79800	ALS2CR8	-0.9	http://www.microrna.org/microrna/getMrna.do?gene=79800&matureName=hsa-miR-10b*&organism=9606
hsa-miR-10b-3p	MIMAT0004556	hsa-miR-10b*	54101	RIPK4	-0.69	http://www.microrna.org/microrna/getMrna.do?gene=54101&matureName=hsa-miR-10b*&organism=9606
hsa-miR-10b-3p	MIMAT0004556	hsa-miR-10b*	2538	G6PC	-0.51	http://www.microrna.org/microrna/getMrna.do?gene=2538&matureName=hsa-miR-10b*&organism=9606
hsa-miR-10b-3p	MIMAT0004556	hsa-miR-10b*	5250	SLC25A3	-0.96	http://www.microrna.org/microrna/getMrna.do?gene=5250&matureName=hsa-miR-10b*&organism=9606
hsa-miR-10b-3p	MIMAT0004556	hsa-miR-10b*	154865	IQUB	-0.12	http://www.microrna.org/microrna/getMrna.do?gene=154865&matureName=hsa-miR-10b*&organism=9606
hsa-miR-10b-3p	MIMAT0004556	hsa-miR-10b*	54847	SIDT1	-1.01	http://www.microrna.org/microrna/getMrna.do?gene=54847&matureName=hsa-miR-10b*&organism=9606
hsa-miR-10b-3p	MIMAT0004556	hsa-miR-10b*	1508	CTSB	-0.12	http://www.microrna.org/microrna/getMrna.do?gene=1508&matureName=hsa-miR-10b*&organism=9606
hsa-miR-10b-3p	MIMAT0004556	hsa-miR-10b*	23469	PHF3	-0.11	http://www.microrna.org/microrna/getMrna.do?gene=23469&matureName=hsa-miR-10b*&organism=9606
hsa-miR-10b-3p	MIMAT0004556	hsa-miR-10b*	2132	EXT2	-0.27	http://www.microrna.org/microrna/getMrna.do?gene=2132&matureName=hsa-miR-10b*&organism=9606
hsa-miR-10b-3p	MIMAT0004556	hsa-miR-10b*	7627	ZNF75A	-0.24	http://www.microrna.org/microrna/getMrna.do?gene=7627&matureName=hsa-miR-10b*&organism=9606
hsa-miR-10b-3p	MIMAT0004556	hsa-miR-10b*	407738	FAM19A1	-0.14	http://www.microrna.org/microrna/getMrna.do?gene=407738&matureName=hsa-miR-10b*&organism=9606
hsa-miR-10b-3p	MIMAT0004556	hsa-miR-10b*	407738	FAM19A1	-0.18	http://www.microrna.org/microrna/getMrna.do?gene=407738&matureName=hsa-miR-10b*&organism=9606
hsa-miR-10b-3p	MIMAT0004556	hsa-miR-10b*	780	DDR1	-0.34	http://www.microrna.org/microrna/getMrna.do?gene=780&matureName=hsa-miR-10b*&organism=9606
hsa-miR-10b-3p	MIMAT0004556	hsa-miR-10b*	171423	PDIA3P	-0.83	http://www.microrna.org/microrna/getMrna.do?gene=171423&matureName=hsa-miR-10b*&organism=9606
hsa-miR-10b-3p	MIMAT0004556	hsa-miR-10b*	60558	GUF1	-0.19	http://www.microrna.org/microrna/getMrna.do?gene=60558&matureName=hsa-miR-10b*&organism=9606
hsa-miR-10b-3p	MIMAT0004556	hsa-miR-10b*	60558	GUF1	-0.35	http://www.microrna.org/microrna/getMrna.do?gene=60558&matureName=hsa-miR-10b*&organism=9606
hsa-miR-10b-3p	MIMAT0004556	hsa-miR-10b*	931	MS4A1	-0.43	http://www.microrna.org/microrna/getMrna.do?gene=931&matureName=hsa-miR-10b*&organism=9606
hsa-miR-10b-3p	MIMAT0004556	hsa-miR-10b*	256471	MFSD8	-0.78	http://www.microrna.org/microrna/getMrna.do?gene=256471&matureName=hsa-miR-10b*&organism=9606
hsa-miR-10b-3p	MIMAT0004556	hsa-miR-10b*	29079	MED4	-0.35	http://www.microrna.org/microrna/getMrna.do?gene=29079&matureName=hsa-miR-10b*&organism=9606
hsa-miR-10b-3p	MIMAT0004556	hsa-miR-10b*	10803	CCR9	-0.98	http://www.microrna.org/microrna/getMrna.do?gene=10803&matureName=hsa-miR-10b*&organism=9606
hsa-miR-10b-3p	MIMAT0004556	hsa-miR-10b*	100	ADA	-0.79	http://www.microrna.org/microrna/getMrna.do?gene=100&matureName=hsa-miR-10b*&organism=9606
hsa-miR-10b-3p	MIMAT0004556	hsa-miR-10b*	3631	INPP4A	-0.1	http://www.microrna.org/microrna/getMrna.do?gene=3631&matureName=hsa-miR-10b*&organism=9606
hsa-miR-10b-3p	MIMAT0004556	hsa-miR-10b*	64067	NPAS3	-0.1	http://www.microrna.org/microrna/getMrna.do?gene=64067&matureName=hsa-miR-10b*&organism=9606
hsa-miR-10b-3p	MIMAT0004556	hsa-miR-10b*	780	DDR1	-0.38	http://www.microrna.org/microrna/getMrna.do?gene=780&matureName=hsa-miR-10b*&organism=9606
hsa-miR-10b-3p	MIMAT0004556	hsa-miR-10b*	3620	IDO1	-0.72	http://www.microrna.org/microrna/getMrna.do?gene=3620&matureName=hsa-miR-10b*&organism=9606
hsa-miR-10b-3p	MIMAT0004556	hsa-miR-10b*	3620	IDO1	-0.23	http://www.microrna.org/microrna/getMrna.do?gene=3620&matureName=hsa-miR-10b*&organism=9606
hsa-miR-10b-3p	MIMAT0004556	hsa-miR-10b*	5354	PLP1	-0.33	http://www.microrna.org/microrna/getMrna.do?gene=5354&matureName=hsa-miR-10b*&organism=9606
hsa-miR-10b-3p	MIMAT0004556	hsa-miR-10b*	8913	CACNA1G	-0.56	http://www.microrna.org/microrna/getMrna.do?gene=8913&matureName=hsa-miR-10b*&organism=9606
hsa-miR-10b-3p	MIMAT0004556	hsa-miR-10b*	8913	CACNA1G	-0.32	http://www.microrna.org/microrna/getMrna.do?gene=8913&matureName=hsa-miR-10b*&organism=9606
hsa-miR-10b-3p	MIMAT0004556	hsa-miR-10b*	51161	C3orf18	-0.1	http://www.microrna.org/microrna/getMrna.do?gene=51161&matureName=hsa-miR-10b*&organism=9606
hsa-miR-10b-3p	MIMAT0004556	hsa-miR-10b*	22929	SEPHS1	-0.1	http://www.microrna.org/microrna/getMrna.do?gene=22929&matureName=hsa-miR-10b*&organism=9606
hsa-miR-10b-3p	MIMAT0004556	hsa-miR-10b*	22925	PLA2R1	-0.14	http://www.microrna.org/microrna/getMrna.do?gene=22925&matureName=hsa-miR-10b*&organism=9606
hsa-miR-10b-3p	MIMAT0004556	hsa-miR-10b*	85007	AGXT2L2	-0.32	http://www.microrna.org/microrna/getMrna.do?gene=85007&matureName=hsa-miR-10b*&organism=9606
hsa-miR-10b-3p	MIMAT0004556	hsa-miR-10b*	79611	ACSS3	-0.85	http://www.microrna.org/microrna/getMrna.do?gene=79611&matureName=hsa-miR-10b*&organism=9606
hsa-miR-10b-3p	MIMAT0004556	hsa-miR-10b*	4281	MID1	-0.38	http://www.microrna.org/microrna/getMrna.do?gene=4281&matureName=hsa-miR-10b*&organism=9606
hsa-miR-10b-3p	MIMAT0004556	hsa-miR-10b*	51271	UBAP1	-0.47	http://www.microrna.org/microrna/getMrna.do?gene=51271&matureName=hsa-miR-10b*&organism=9606
hsa-miR-10b-3p	MIMAT0004556	hsa-miR-10b*	401136	TMPRSS11BNL	-0.48	http://www.microrna.org/microrna/getMrna.do?gene=401136&matureName=hsa-miR-10b*&organism=9606
hsa-miR-10b-3p	MIMAT0004556	hsa-miR-10b*	3985	LIMK2	-0.14	http://www.microrna.org/microrna/getMrna.do?gene=3985&matureName=hsa-miR-10b*&organism=9606
hsa-miR-10b-3p	MIMAT0004556	hsa-miR-10b*	3809	KIR2DS4	-0.54	http://www.microrna.org/microrna/getMrna.do?gene=3809&matureName=hsa-miR-10b*&organism=9606
hsa-miR-10b-3p	MIMAT0004556	hsa-miR-10b*	3809	KIR2DS4	-0.2	http://www.microrna.org/microrna/getMrna.do?gene=3809&matureName=hsa-miR-10b*&organism=9606
hsa-miR-10b-3p	MIMAT0004556	hsa-miR-10b*	51535	PPHLN1	-0.49	http://www.microrna.org/microrna/getMrna.do?gene=51535&matureName=hsa-miR-10b*&organism=9606
hsa-miR-10b-3p	MIMAT0004556	hsa-miR-10b*	399979	SNX19	-0.19	http://www.microrna.org/microrna/getMrna.do?gene=399979&matureName=hsa-miR-10b*&organism=9606
hsa-miR-10b-3p	MIMAT0004556	hsa-miR-10b*	3185	HNRNPF	-0.41	http://www.microrna.org/microrna/getMrna.do?gene=3185&matureName=hsa-miR-10b*&organism=9606
hsa-miR-10b-3p	MIMAT0004556	hsa-miR-10b*	79794	C12orf49	-0.18	http://www.microrna.org/microrna/getMrna.do?gene=79794&matureName=hsa-miR-10b*&organism=9606
hsa-miR-10b-3p	MIMAT0004556	hsa-miR-10b*	221442	LOC221442	-0.51	http://www.microrna.org/microrna/getMrna.do?gene=221442&matureName=hsa-miR-10b*&organism=9606
hsa-miR-10b-3p	MIMAT0004556	hsa-miR-10b*	1191	CLU	-0.43	http://www.microrna.org/microrna/getMrna.do?gene=1191&matureName=hsa-miR-10b*&organism=9606
hsa-miR-10b-3p	MIMAT0004556	hsa-miR-10b*	4781	NFIB	-0.17	http://www.microrna.org/microrna/getMrna.do?gene=4781&matureName=hsa-miR-10b*&organism=9606
hsa-miR-10b-3p	MIMAT0004556	hsa-miR-10b*	3109	HLA-DMB	-0.26	http://www.microrna.org/microrna/getMrna.do?gene=3109&matureName=hsa-miR-10b*&organism=9606
hsa-miR-10b-3p	MIMAT0004556	hsa-miR-10b*	6760	SS18	-0.11	http://www.microrna.org/microrna/getMrna.do?gene=6760&matureName=hsa-miR-10b*&organism=9606
hsa-miR-10b-3p	MIMAT0004556	hsa-miR-10b*	84293	C10orf58	-0.23	http://www.microrna.org/microrna/getMrna.do?gene=84293&matureName=hsa-miR-10b*&organism=9606
hsa-miR-10b-3p	MIMAT0004556	hsa-miR-10b*	10217	CTDSPL	-0.61	http://www.microrna.org/microrna/getMrna.do?gene=10217&matureName=hsa-miR-10b*&organism=9606
hsa-miR-10b-3p	MIMAT0004556	hsa-miR-10b*	246269	LACE1	-0.26	http://www.microrna.org/microrna/getMrna.do?gene=246269&matureName=hsa-miR-10b*&organism=9606
hsa-miR-10b-3p	MIMAT0004556	hsa-miR-10b*	154007	SNRNP48	-0.2	http://www.microrna.org/microrna/getMrna.do?gene=154007&matureName=hsa-miR-10b*&organism=9606
hsa-miR-10b-3p	MIMAT0004556	hsa-miR-10b*	29899	GPSM2	-0.31	http://www.microrna.org/microrna/getMrna.do?gene=29899&matureName=hsa-miR-10b*&organism=9606
hsa-miR-10b-3p	MIMAT0004556	hsa-miR-10b*	3680	ITGA9	-1.02	http://www.microrna.org/microrna/getMrna.do?gene=3680&matureName=hsa-miR-10b*&organism=9606
hsa-miR-10b-3p	MIMAT0004556	hsa-miR-10b*	3680	ITGA9	-0.48	http://www.microrna.org/microrna/getMrna.do?gene=3680&matureName=hsa-miR-10b*&organism=9606
hsa-miR-10b-3p	MIMAT0004556	hsa-miR-10b*	3680	ITGA9	-0.97	http://www.microrna.org/microrna/getMrna.do?gene=3680&matureName=hsa-miR-10b*&organism=9606
hsa-miR-10b-3p	MIMAT0004556	hsa-miR-10b*	98	ACYP2	-0.11	http://www.microrna.org/microrna/getMrna.do?gene=98&matureName=hsa-miR-10b*&organism=9606
hsa-miR-10b-3p	MIMAT0004556	hsa-miR-10b*	55870	ASH1L	-0.15	http://www.microrna.org/microrna/getMrna.do?gene=55870&matureName=hsa-miR-10b*&organism=9606
hsa-miR-10b-3p	MIMAT0004556	hsa-miR-10b*	25950	RWDD3	-0.59	http://www.microrna.org/microrna/getMrna.do?gene=25950&matureName=hsa-miR-10b*&organism=9606
hsa-miR-10b-3p	MIMAT0004556	hsa-miR-10b*	399694	SHC4	-0.23	http://www.microrna.org/microrna/getMrna.do?gene=399694&matureName=hsa-miR-10b*&organism=9606
hsa-miR-10b-3p	MIMAT0004556	hsa-miR-10b*	7494	XBP1	-0.1	http://www.microrna.org/microrna/getMrna.do?gene=7494&matureName=hsa-miR-10b*&organism=9606
hsa-miR-10b-3p	MIMAT0004556	hsa-miR-10b*	9913	SUPT7L	-0.61	http://www.microrna.org/microrna/getMrna.do?gene=9913&matureName=hsa-miR-10b*&organism=9606
hsa-miR-10b-3p	MIMAT0004556	hsa-miR-10b*	79839	CCDC102B	-0.15	http://www.microrna.org/microrna/getMrna.do?gene=79839&matureName=hsa-miR-10b*&organism=9606
hsa-miR-10b-3p	MIMAT0004556	hsa-miR-10b*	8082	SSPN	-0.25	http://www.microrna.org/microrna/getMrna.do?gene=8082&matureName=hsa-miR-10b*&organism=9606
hsa-miR-10b-3p	MIMAT0004556	hsa-miR-10b*	51128	SAR1B	-0.14	http://www.microrna.org/microrna/getMrna.do?gene=51128&matureName=hsa-miR-10b*&organism=9606
hsa-miR-10b-3p	MIMAT0004556	hsa-miR-10b*	5257	PHKB	-0.33	http://www.microrna.org/microrna/getMrna.do?gene=5257&matureName=hsa-miR-10b*&organism=9606
hsa-miR-10b-3p	MIMAT0004556	hsa-miR-10b*	5257	PHKB	-0.42	http://www.microrna.org/microrna/getMrna.do?gene=5257&matureName=hsa-miR-10b*&organism=9606
hsa-miR-10b-3p	MIMAT0004556	hsa-miR-10b*	5257	PHKB	-0.11	http://www.microrna.org/microrna/getMrna.do?gene=5257&matureName=hsa-miR-10b*&organism=9606
hsa-miR-10b-3p	MIMAT0004556	hsa-miR-10b*	728323	LOC728323	-0.1	http://www.microrna.org/microrna/getMrna.do?gene=728323&matureName=hsa-miR-10b*&organism=9606
hsa-miR-10b-3p	MIMAT0004556	hsa-miR-10b*	55632	G2E3	-0.43	http://www.microrna.org/microrna/getMrna.do?gene=55632&matureName=hsa-miR-10b*&organism=9606
hsa-miR-10b-3p	MIMAT0004556	hsa-miR-10b*	54934	C12orf41	-0.24	http://www.microrna.org/microrna/getMrna.do?gene=54934&matureName=hsa-miR-10b*&organism=9606
hsa-miR-10b-3p	MIMAT0004556	hsa-miR-10b*	2395	FXN	-0.64	http://www.microrna.org/microrna/getMrna.do?gene=2395&matureName=hsa-miR-10b*&organism=9606
hsa-miR-10b-3p	MIMAT0004556	hsa-miR-10b*	831	CAST	-0.23	http://www.microrna.org/microrna/getMrna.do?gene=831&matureName=hsa-miR-10b*&organism=9606
hsa-miR-10b-3p	MIMAT0004556	hsa-miR-10b*	23198	PSME4	-0.12	http://www.microrna.org/microrna/getMrna.do?gene=23198&matureName=hsa-miR-10b*&organism=9606
hsa-miR-10b-3p	MIMAT0004556	hsa-miR-10b*	8439	NSMAF	-0.78	http://www.microrna.org/microrna/getMrna.do?gene=8439&matureName=hsa-miR-10b*&organism=9606
hsa-miR-10b-3p	MIMAT0004556	hsa-miR-10b*	27065	D4S234E	-0.12	http://www.microrna.org/microrna/getMrna.do?gene=27065&matureName=hsa-miR-10b*&organism=9606
hsa-miR-10b-3p	MIMAT0004556	hsa-miR-10b*	27236	ARFIP1	-1.1	http://www.microrna.org/microrna/getMrna.do?gene=27236&matureName=hsa-miR-10b*&organism=9606
hsa-miR-10b-3p	MIMAT0004556	hsa-miR-10b*	27236	ARFIP1	-0.31	http://www.microrna.org/microrna/getMrna.do?gene=27236&matureName=hsa-miR-10b*&organism=9606
hsa-miR-10b-3p	MIMAT0004556	hsa-miR-10b*	27236	ARFIP1	-0.28	http://www.microrna.org/microrna/getMrna.do?gene=27236&matureName=hsa-miR-10b*&organism=9606
hsa-miR-10b-3p	MIMAT0004556	hsa-miR-10b*	84253	GARNL3	-0.51	http://www.microrna.org/microrna/getMrna.do?gene=84253&matureName=hsa-miR-10b*&organism=9606
hsa-miR-10b-3p	MIMAT0004556	hsa-miR-10b*	26095	PTPN20B	-0.12	http://www.microrna.org/microrna/getMrna.do?gene=26095&matureName=hsa-miR-10b*&organism=9606
hsa-miR-10b-3p	MIMAT0004556	hsa-miR-10b*	780	DDR1	-0.34	http://www.microrna.org/microrna/getMrna.do?gene=780&matureName=hsa-miR-10b*&organism=9606
hsa-miR-10b-3p	MIMAT0004556	hsa-miR-10b*	9971	NR1H4	-0.17	http://www.microrna.org/microrna/getMrna.do?gene=9971&matureName=hsa-miR-10b*&organism=9606
hsa-miR-10b-3p	MIMAT0004556	hsa-miR-10b*	85364	ZCCHC3	-0.25	http://www.microrna.org/microrna/getMrna.do?gene=85364&matureName=hsa-miR-10b*&organism=9606
hsa-miR-10b-3p	MIMAT0004556	hsa-miR-10b*	85463	ZC3H12C	-0.12	http://www.microrna.org/microrna/getMrna.do?gene=85463&matureName=hsa-miR-10b*&organism=9606
hsa-miR-10b-3p	MIMAT0004556	hsa-miR-10b*	23253	ANKRD12	-0.84	http://www.microrna.org/microrna/getMrna.do?gene=23253&matureName=hsa-miR-10b*&organism=9606
hsa-miR-10b-3p	MIMAT0004556	hsa-miR-10b*	23253	ANKRD12	-0.11	http://www.microrna.org/microrna/getMrna.do?gene=23253&matureName=hsa-miR-10b*&organism=9606
hsa-miR-10b-3p	MIMAT0004556	hsa-miR-10b*	9425	CDYL	-0.33	http://www.microrna.org/microrna/getMrna.do?gene=9425&matureName=hsa-miR-10b*&organism=9606
hsa-miR-10b-3p	MIMAT0004556	hsa-miR-10b*	1778	DYNC1H1	-0.31	http://www.microrna.org/microrna/getMrna.do?gene=1778&matureName=hsa-miR-10b*&organism=9606
hsa-miR-10b-3p	MIMAT0004556	hsa-miR-10b*	151242	PPP1R1C	-0.52	http://www.microrna.org/microrna/getMrna.do?gene=151242&matureName=hsa-miR-10b*&organism=9606
hsa-miR-10b-3p	MIMAT0004556	hsa-miR-10b*	8470	SORBS2	-0.12	http://www.microrna.org/microrna/getMrna.do?gene=8470&matureName=hsa-miR-10b*&organism=9606
hsa-miR-10b-3p	MIMAT0004556	hsa-miR-10b*	8470	SORBS2	-0.51	http://www.microrna.org/microrna/getMrna.do?gene=8470&matureName=hsa-miR-10b*&organism=9606
hsa-miR-10b-3p	MIMAT0004556	hsa-miR-10b*	4311	MME	-0.14	http://www.microrna.org/microrna/getMrna.do?gene=4311&matureName=hsa-miR-10b*&organism=9606
hsa-miR-10b-3p	MIMAT0004556	hsa-miR-10b*	2778	GNAS	-0.57	http://www.microrna.org/microrna/getMrna.do?gene=2778&matureName=hsa-miR-10b*&organism=9606
hsa-miR-10b-3p	MIMAT0004556	hsa-miR-10b*	800	CALD1	-0.71	http://www.microrna.org/microrna/getMrna.do?gene=800&matureName=hsa-miR-10b*&organism=9606
hsa-miR-10b-3p	MIMAT0004556	hsa-miR-10b*	800	CALD1	-0.17	http://www.microrna.org/microrna/getMrna.do?gene=800&matureName=hsa-miR-10b*&organism=9606
hsa-miR-10b-3p	MIMAT0004556	hsa-miR-10b*	1738	DLD	-0.55	http://www.microrna.org/microrna/getMrna.do?gene=1738&matureName=hsa-miR-10b*&organism=9606
hsa-miR-10b-3p	MIMAT0004556	hsa-miR-10b*	23194	FBXL7	-0.11	http://www.microrna.org/microrna/getMrna.do?gene=23194&matureName=hsa-miR-10b*&organism=9606
hsa-miR-10b-3p	MIMAT0004556	hsa-miR-10b*	283392	LOC283392	-0.1	http://www.microrna.org/microrna/getMrna.do?gene=283392&matureName=hsa-miR-10b*&organism=9606
hsa-miR-10b-3p	MIMAT0004556	hsa-miR-10b*	283392	LOC283392	-0.47	http://www.microrna.org/microrna/getMrna.do?gene=283392&matureName=hsa-miR-10b*&organism=9606
hsa-miR-10b-3p	MIMAT0004556	hsa-miR-10b*	8726	EED	-0.28	http://www.microrna.org/microrna/getMrna.do?gene=8726&matureName=hsa-miR-10b*&organism=9606
hsa-miR-10b-3p	MIMAT0004556	hsa-miR-10b*	8726	EED	-0.56	http://www.microrna.org/microrna/getMrna.do?gene=8726&matureName=hsa-miR-10b*&organism=9606
hsa-miR-10b-3p	MIMAT0004556	hsa-miR-10b*	158038	LINGO2	-0.1	http://www.microrna.org/microrna/getMrna.do?gene=158038&matureName=hsa-miR-10b*&organism=9606
hsa-miR-10b-3p	MIMAT0004556	hsa-miR-10b*	1387	CREBBP	-0.3	http://www.microrna.org/microrna/getMrna.do?gene=1387&matureName=hsa-miR-10b*&organism=9606
hsa-miR-10b-3p	MIMAT0004556	hsa-miR-10b*	395	ARHGAP6	-0.27	http://www.microrna.org/microrna/getMrna.do?gene=395&matureName=hsa-miR-10b*&organism=9606
hsa-miR-10b-3p	MIMAT0004556	hsa-miR-10b*	26148	C10orf12	-0.29	http://www.microrna.org/microrna/getMrna.do?gene=26148&matureName=hsa-miR-10b*&organism=9606
hsa-miR-10b-3p	MIMAT0004556	hsa-miR-10b*	801	CALM1	-0.26	http://www.microrna.org/microrna/getMrna.do?gene=801&matureName=hsa-miR-10b*&organism=9606
hsa-miR-10b-3p	MIMAT0004556	hsa-miR-10b*	54868	TMEM104	-0.17	http://www.microrna.org/microrna/getMrna.do?gene=54868&matureName=hsa-miR-10b*&organism=9606
hsa-miR-10b-3p	MIMAT0004556	hsa-miR-10b*	64778	FNDC3B	-0.11	http://www.microrna.org/microrna/getMrna.do?gene=64778&matureName=hsa-miR-10b*&organism=9606
hsa-miR-10b-3p	MIMAT0004556	hsa-miR-10b*	717	C2	-0.21	http://www.microrna.org/microrna/getMrna.do?gene=717&matureName=hsa-miR-10b*&organism=9606
hsa-miR-10b-3p	MIMAT0004556	hsa-miR-10b*	4233	MET	-0.37	http://www.microrna.org/microrna/getMrna.do?gene=4233&matureName=hsa-miR-10b*&organism=9606
hsa-miR-10b-3p	MIMAT0004556	hsa-miR-10b*	2737	GLI3	-0.22	http://www.microrna.org/microrna/getMrna.do?gene=2737&matureName=hsa-miR-10b*&organism=9606
hsa-miR-10b-3p	MIMAT0004556	hsa-miR-10b*	23760	PITPNB	-0.84	http://www.microrna.org/microrna/getMrna.do?gene=23760&matureName=hsa-miR-10b*&organism=9606
hsa-miR-10b-3p	MIMAT0004556	hsa-miR-10b*	23760	PITPNB	-0.59	http://www.microrna.org/microrna/getMrna.do?gene=23760&matureName=hsa-miR-10b*&organism=9606
hsa-miR-10b-3p	MIMAT0004556	hsa-miR-10b*	10059	DNM1L	-0.94	http://www.microrna.org/microrna/getMrna.do?gene=10059&matureName=hsa-miR-10b*&organism=9606
hsa-miR-10b-3p	MIMAT0004556	hsa-miR-10b*	1718	DHCR24	-0.14	http://www.microrna.org/microrna/getMrna.do?gene=1718&matureName=hsa-miR-10b*&organism=9606
hsa-miR-10b-3p	MIMAT0004556	hsa-miR-10b*	64881	PCDH20	-0.15	http://www.microrna.org/microrna/getMrna.do?gene=64881&matureName=hsa-miR-10b*&organism=9606
hsa-miR-10b-3p	MIMAT0004556	hsa-miR-10b*	64324	NSD1	-0.49	http://www.microrna.org/microrna/getMrna.do?gene=64324&matureName=hsa-miR-10b*&organism=9606
hsa-miR-10b-3p	MIMAT0004556	hsa-miR-10b*	134121	C5orf49	-0.66	http://www.microrna.org/microrna/getMrna.do?gene=134121&matureName=hsa-miR-10b*&organism=9606
hsa-miR-10b-3p	MIMAT0004556	hsa-miR-10b*	1016	CDH18	-1.32	http://www.microrna.org/microrna/getMrna.do?gene=1016&matureName=hsa-miR-10b*&organism=9606
hsa-miR-10b-3p	MIMAT0004556	hsa-miR-10b*	7871	SLMAP	-0.26	http://www.microrna.org/microrna/getMrna.do?gene=7871&matureName=hsa-miR-10b*&organism=9606
hsa-miR-10b-3p	MIMAT0004556	hsa-miR-10b*	1875	E2F5	-0.27	http://www.microrna.org/microrna/getMrna.do?gene=1875&matureName=hsa-miR-10b*&organism=9606
hsa-miR-10b-3p	MIMAT0004556	hsa-miR-10b*	1875	E2F5	-0.36	http://www.microrna.org/microrna/getMrna.do?gene=1875&matureName=hsa-miR-10b*&organism=9606
hsa-miR-10b-3p	MIMAT0004556	hsa-miR-10b*	167838	TXLNB	-0.88	http://www.microrna.org/microrna/getMrna.do?gene=167838&matureName=hsa-miR-10b*&organism=9606
hsa-miR-10b-3p	MIMAT0004556	hsa-miR-10b*	22985	ACIN1	-0.21	http://www.microrna.org/microrna/getMrna.do?gene=22985&matureName=hsa-miR-10b*&organism=9606
hsa-miR-10b-3p	MIMAT0004556	hsa-miR-10b*	2966	GTF2H2	-0.31	http://www.microrna.org/microrna/getMrna.do?gene=2966&matureName=hsa-miR-10b*&organism=9606
hsa-miR-10b-3p	MIMAT0004556	hsa-miR-10b*	2966	GTF2H2	-0.12	http://www.microrna.org/microrna/getMrna.do?gene=2966&matureName=hsa-miR-10b*&organism=9606
hsa-miR-10b-3p	MIMAT0004556	hsa-miR-10b*	112479	ERI2	-0.15	http://www.microrna.org/microrna/getMrna.do?gene=112479&matureName=hsa-miR-10b*&organism=9606
hsa-miR-10b-3p	MIMAT0004556	hsa-miR-10b*	10927	SPIN1	-0.32	http://www.microrna.org/microrna/getMrna.do?gene=10927&matureName=hsa-miR-10b*&organism=9606
hsa-miR-10b-3p	MIMAT0004556	hsa-miR-10b*	10927	SPIN1	-0.17	http://www.microrna.org/microrna/getMrna.do?gene=10927&matureName=hsa-miR-10b*&organism=9606
hsa-miR-10b-3p	MIMAT0004556	hsa-miR-10b*	9295	SFRS11	-0.16	http://www.microrna.org/microrna/getMrna.do?gene=9295&matureName=hsa-miR-10b*&organism=9606
hsa-miR-10b-3p	MIMAT0004556	hsa-miR-10b*	23765	IL17RA	-0.21	http://www.microrna.org/microrna/getMrna.do?gene=23765&matureName=hsa-miR-10b*&organism=9606
hsa-miR-10b-3p	MIMAT0004556	hsa-miR-10b*	642938	FAM196A	-0.69	http://www.microrna.org/microrna/getMrna.do?gene=642938&matureName=hsa-miR-10b*&organism=9606
hsa-miR-10b-3p	MIMAT0004556	hsa-miR-10b*	3841	KPNA5	-0.11	http://www.microrna.org/microrna/getMrna.do?gene=3841&matureName=hsa-miR-10b*&organism=9606
hsa-miR-10b-3p	MIMAT0004556	hsa-miR-10b*	23533	PIK3R5	-0.28	http://www.microrna.org/microrna/getMrna.do?gene=23533&matureName=hsa-miR-10b*&organism=9606
hsa-miR-10b-3p	MIMAT0004556	hsa-miR-10b*	7009	TMBIM6	-0.18	http://www.microrna.org/microrna/getMrna.do?gene=7009&matureName=hsa-miR-10b*&organism=9606
hsa-miR-10b-3p	MIMAT0004556	hsa-miR-10b*	220	ALDH1A3	-0.31	http://www.microrna.org/microrna/getMrna.do?gene=220&matureName=hsa-miR-10b*&organism=9606
hsa-miR-10b-3p	MIMAT0004556	hsa-miR-10b*	51385	ZNF589	-0.22	http://www.microrna.org/microrna/getMrna.do?gene=51385&matureName=hsa-miR-10b*&organism=9606
hsa-miR-10b-3p	MIMAT0004556	hsa-miR-10b*	80216	ALPK1	-0.1	http://www.microrna.org/microrna/getMrna.do?gene=80216&matureName=hsa-miR-10b*&organism=9606
hsa-miR-10b-3p	MIMAT0004556	hsa-miR-10b*	7124	TNF	-0.23	http://www.microrna.org/microrna/getMrna.do?gene=7124&matureName=hsa-miR-10b*&organism=9606
hsa-miR-10b-3p	MIMAT0004556	hsa-miR-10b*	158381	LOC158381	-0.43	http://www.microrna.org/microrna/getMrna.do?gene=158381&matureName=hsa-miR-10b*&organism=9606
hsa-miR-10b-3p	MIMAT0004556	hsa-miR-10b*	4585	MUC4	-0.49	http://www.microrna.org/microrna/getMrna.do?gene=4585&matureName=hsa-miR-10b*&organism=9606
hsa-miR-10b-3p	MIMAT0004556	hsa-miR-10b*	493869	GPX8	-0.15	http://www.microrna.org/microrna/getMrna.do?gene=493869&matureName=hsa-miR-10b*&organism=9606
hsa-miR-10b-3p	MIMAT0004556	hsa-miR-10b*	7626	ZNF75D	-0.45	http://www.microrna.org/microrna/getMrna.do?gene=7626&matureName=hsa-miR-10b*&organism=9606
hsa-miR-10b-3p	MIMAT0004556	hsa-miR-10b*	80324	PUS1	-0.46	http://www.microrna.org/microrna/getMrna.do?gene=80324&matureName=hsa-miR-10b*&organism=9606
hsa-miR-10b-3p	MIMAT0004556	hsa-miR-10b*	2538	G6PC	-0.62	http://www.microrna.org/microrna/getMrna.do?gene=2538&matureName=hsa-miR-10b*&organism=9606
hsa-miR-10b-3p	MIMAT0004556	hsa-miR-10b*	4100	MAGEA1	-0.18	http://www.microrna.org/microrna/getMrna.do?gene=4100&matureName=hsa-miR-10b*&organism=9606
hsa-miR-10b-3p	MIMAT0004556	hsa-miR-10b*	2036	EPB41L1	-0.17	http://www.microrna.org/microrna/getMrna.do?gene=2036&matureName=hsa-miR-10b*&organism=9606
hsa-miR-10b-3p	MIMAT0004556	hsa-miR-10b*	4193	MDM2	-0.1	http://www.microrna.org/microrna/getMrna.do?gene=4193&matureName=hsa-miR-10b*&organism=9606
hsa-miR-10b-3p	MIMAT0004556	hsa-miR-10b*	51430	C1orf9	-0.6	http://www.microrna.org/microrna/getMrna.do?gene=51430&matureName=hsa-miR-10b*&organism=9606
hsa-miR-10b-3p	MIMAT0004556	hsa-miR-10b*	9698	PUM1	-1.25	http://www.microrna.org/microrna/getMrna.do?gene=9698&matureName=hsa-miR-10b*&organism=9606
hsa-miR-10b-3p	MIMAT0004556	hsa-miR-10b*	9698	PUM1	-0.13	http://www.microrna.org/microrna/getMrna.do?gene=9698&matureName=hsa-miR-10b*&organism=9606
hsa-miR-10b-3p	MIMAT0004556	hsa-miR-10b*	9698	PUM1	-0.21	http://www.microrna.org/microrna/getMrna.do?gene=9698&matureName=hsa-miR-10b*&organism=9606
hsa-miR-10b-3p	MIMAT0004556	hsa-miR-10b*	10009	ZBTB33	-1.01	http://www.microrna.org/microrna/getMrna.do?gene=10009&matureName=hsa-miR-10b*&organism=9606
hsa-miR-10b-3p	MIMAT0004556	hsa-miR-10b*	10009	ZBTB33	-0.21	http://www.microrna.org/microrna/getMrna.do?gene=10009&matureName=hsa-miR-10b*&organism=9606
hsa-miR-10b-3p	MIMAT0004556	hsa-miR-10b*	23236	PLCB1	-0.73	http://www.microrna.org/microrna/getMrna.do?gene=23236&matureName=hsa-miR-10b*&organism=9606
hsa-miR-10b-3p	MIMAT0004556	hsa-miR-10b*	55783	FTSJD1	-0.32	http://www.microrna.org/microrna/getMrna.do?gene=55783&matureName=hsa-miR-10b*&organism=9606
hsa-miR-10b-3p	MIMAT0004556	hsa-miR-10b*	79621	RNASEH2B	-0.13	http://www.microrna.org/microrna/getMrna.do?gene=79621&matureName=hsa-miR-10b*&organism=9606
hsa-miR-10b-3p	MIMAT0004556	hsa-miR-10b*	55092	TMEM51	-0.19	http://www.microrna.org/microrna/getMrna.do?gene=55092&matureName=hsa-miR-10b*&organism=9606
hsa-miR-10b-3p	MIMAT0004556	hsa-miR-10b*	100289314	LOC100289314	-0.96	http://www.microrna.org/microrna/getMrna.do?gene=100289314&matureName=hsa-miR-10b*&organism=9606
hsa-miR-10b-3p	MIMAT0004556	hsa-miR-10b*	83988	NCALD	-0.16	http://www.microrna.org/microrna/getMrna.do?gene=83988&matureName=hsa-miR-10b*&organism=9606
hsa-miR-10b-3p	MIMAT0004556	hsa-miR-10b*	6651	SON	-0.41	http://www.microrna.org/microrna/getMrna.do?gene=6651&matureName=hsa-miR-10b*&organism=9606
hsa-miR-10b-3p	MIMAT0004556	hsa-miR-10b*	26095	PTPN20B	-0.15	http://www.microrna.org/microrna/getMrna.do?gene=26095&matureName=hsa-miR-10b*&organism=9606
hsa-miR-10b-3p	MIMAT0004556	hsa-miR-10b*	23136	EPB41L3	-0.23	http://www.microrna.org/microrna/getMrna.do?gene=23136&matureName=hsa-miR-10b*&organism=9606
hsa-miR-10b-3p	MIMAT0004556	hsa-miR-10b*	23291	FBXW11	-0.93	http://www.microrna.org/microrna/getMrna.do?gene=23291&matureName=hsa-miR-10b*&organism=9606
hsa-miR-10b-3p	MIMAT0004556	hsa-miR-10b*	1910	EDNRB	-0.41	http://www.microrna.org/microrna/getMrna.do?gene=1910&matureName=hsa-miR-10b*&organism=9606
hsa-miR-10b-3p	MIMAT0004556	hsa-miR-10b*	85440	DOCK7	-0.97	http://www.microrna.org/microrna/getMrna.do?gene=85440&matureName=hsa-miR-10b*&organism=9606
hsa-miR-10b-3p	MIMAT0004556	hsa-miR-10b*	51348	KLRF1	-0.24	http://www.microrna.org/microrna/getMrna.do?gene=51348&matureName=hsa-miR-10b*&organism=9606
hsa-miR-10b-3p	MIMAT0004556	hsa-miR-10b*	56658	TRIM39	-0.49	http://www.microrna.org/microrna/getMrna.do?gene=56658&matureName=hsa-miR-10b*&organism=9606
hsa-miR-10b-3p	MIMAT0004556	hsa-miR-10b*	7172	TPMT	-0.9	http://www.microrna.org/microrna/getMrna.do?gene=7172&matureName=hsa-miR-10b*&organism=9606
hsa-miR-10b-3p	MIMAT0004556	hsa-miR-10b*	55917	CTTNBP2NL	-0.16	http://www.microrna.org/microrna/getMrna.do?gene=55917&matureName=hsa-miR-10b*&organism=9606
hsa-miR-10b-3p	MIMAT0004556	hsa-miR-10b*	63929	XPNPEP3	-0.23	http://www.microrna.org/microrna/getMrna.do?gene=63929&matureName=hsa-miR-10b*&organism=9606
hsa-miR-10b-3p	MIMAT0004556	hsa-miR-10b*	114793	FMNL2	-0.42	http://www.microrna.org/microrna/getMrna.do?gene=114793&matureName=hsa-miR-10b*&organism=9606
hsa-miR-10b-3p	MIMAT0004556	hsa-miR-10b*	727851	RGPD8	-0.92	http://www.microrna.org/microrna/getMrna.do?gene=727851&matureName=hsa-miR-10b*&organism=9606
hsa-miR-10b-3p	MIMAT0004556	hsa-miR-10b*	727851	RGPD8	-0.47	http://www.microrna.org/microrna/getMrna.do?gene=727851&matureName=hsa-miR-10b*&organism=9606
hsa-miR-10b-3p	MIMAT0004556	hsa-miR-10b*	9771	RAPGEF5	-0.1	http://www.microrna.org/microrna/getMrna.do?gene=9771&matureName=hsa-miR-10b*&organism=9606
hsa-miR-10b-3p	MIMAT0004556	hsa-miR-10b*	1431	CS	-0.28	http://www.microrna.org/microrna/getMrna.do?gene=1431&matureName=hsa-miR-10b*&organism=9606
hsa-miR-10b-3p	MIMAT0004556	hsa-miR-10b*	1431	CS	-0.33	http://www.microrna.org/microrna/getMrna.do?gene=1431&matureName=hsa-miR-10b*&organism=9606
hsa-miR-10b-3p	MIMAT0004556	hsa-miR-10b*	4967	OGDH	-0.32	http://www.microrna.org/microrna/getMrna.do?gene=4967&matureName=hsa-miR-10b*&organism=9606
hsa-miR-10b-3p	MIMAT0004556	hsa-miR-10b*	11321	GPN1	-0.66	http://www.microrna.org/microrna/getMrna.do?gene=11321&matureName=hsa-miR-10b*&organism=9606
hsa-miR-10b-3p	MIMAT0004556	hsa-miR-10b*	92906	HNRPLL	-0.58	http://www.microrna.org/microrna/getMrna.do?gene=92906&matureName=hsa-miR-10b*&organism=9606
hsa-miR-10b-3p	MIMAT0004556	hsa-miR-10b*	339231	ARL16	-0.16	http://www.microrna.org/microrna/getMrna.do?gene=339231&matureName=hsa-miR-10b*&organism=9606
hsa-miR-10b-3p	MIMAT0004556	hsa-miR-10b*	5170	PDPK1	-0.78	http://www.microrna.org/microrna/getMrna.do?gene=5170&matureName=hsa-miR-10b*&organism=9606
hsa-miR-10b-3p	MIMAT0004556	hsa-miR-10b*	7518	XRCC4	-0.47	http://www.microrna.org/microrna/getMrna.do?gene=7518&matureName=hsa-miR-10b*&organism=9606
hsa-miR-10b-3p	MIMAT0004556	hsa-miR-10b*	6718	AKR1D1	-0.68	http://www.microrna.org/microrna/getMrna.do?gene=6718&matureName=hsa-miR-10b*&organism=9606
hsa-miR-10b-3p	MIMAT0004556	hsa-miR-10b*	4115	MAGEB4	-1.12	http://www.microrna.org/microrna/getMrna.do?gene=4115&matureName=hsa-miR-10b*&organism=9606
hsa-miR-10b-3p	MIMAT0004556	hsa-miR-10b*	4115	MAGEB4	-0.11	http://www.microrna.org/microrna/getMrna.do?gene=4115&matureName=hsa-miR-10b*&organism=9606
hsa-miR-10b-3p	MIMAT0004556	hsa-miR-10b*	92737	DNER	-0.13	http://www.microrna.org/microrna/getMrna.do?gene=92737&matureName=hsa-miR-10b*&organism=9606
hsa-miR-10b-3p	MIMAT0004556	hsa-miR-10b*	3014	H2AFX	-0.28	http://www.microrna.org/microrna/getMrna.do?gene=3014&matureName=hsa-miR-10b*&organism=9606
hsa-miR-10b-3p	MIMAT0004556	hsa-miR-10b*	90203	SNX21	-1.05	http://www.microrna.org/microrna/getMrna.do?gene=90203&matureName=hsa-miR-10b*&organism=9606
hsa-miR-10b-3p	MIMAT0004556	hsa-miR-10b*	571	BACH1	-1.21	http://www.microrna.org/microrna/getMrna.do?gene=571&matureName=hsa-miR-10b*&organism=9606
hsa-miR-10b-3p	MIMAT0004556	hsa-miR-10b*	126823	KLHDC9	-0.46	http://www.microrna.org/microrna/getMrna.do?gene=126823&matureName=hsa-miR-10b*&organism=9606
hsa-miR-10b-3p	MIMAT0004556	hsa-miR-10b*	2835	GPR12	-0.25	http://www.microrna.org/microrna/getMrna.do?gene=2835&matureName=hsa-miR-10b*&organism=9606
hsa-miR-10b-3p	MIMAT0004556	hsa-miR-10b*	2835	GPR12	-0.54	http://www.microrna.org/microrna/getMrna.do?gene=2835&matureName=hsa-miR-10b*&organism=9606
hsa-miR-10b-3p	MIMAT0004556	hsa-miR-10b*	5080	PAX6	-0.3	http://www.microrna.org/microrna/getMrna.do?gene=5080&matureName=hsa-miR-10b*&organism=9606
hsa-miR-10b-3p	MIMAT0004556	hsa-miR-10b*	51292	GMPR2	-0.22	http://www.microrna.org/microrna/getMrna.do?gene=51292&matureName=hsa-miR-10b*&organism=9606
hsa-miR-10b-3p	MIMAT0004556	hsa-miR-10b*	23277	KIAA0664	-0.4	http://www.microrna.org/microrna/getMrna.do?gene=23277&matureName=hsa-miR-10b*&organism=9606
hsa-miR-10b-3p	MIMAT0004556	hsa-miR-10b*	9856	KIAA0319	-0.11	http://www.microrna.org/microrna/getMrna.do?gene=9856&matureName=hsa-miR-10b*&organism=9606
hsa-miR-10b-3p	MIMAT0004556	hsa-miR-10b*	6928	HNF1B	-1.13	http://www.microrna.org/microrna/getMrna.do?gene=6928&matureName=hsa-miR-10b*&organism=9606
hsa-miR-10b-3p	MIMAT0004556	hsa-miR-10b*	339290	LOC339290	-0.13	http://www.microrna.org/microrna/getMrna.do?gene=339290&matureName=hsa-miR-10b*&organism=9606
hsa-miR-10b-3p	MIMAT0004556	hsa-miR-10b*	5501	PPP1CC	-0.72	http://www.microrna.org/microrna/getMrna.do?gene=5501&matureName=hsa-miR-10b*&organism=9606
hsa-miR-10b-3p	MIMAT0004556	hsa-miR-10b*	5501	PPP1CC	-1.06	http://www.microrna.org/microrna/getMrna.do?gene=5501&matureName=hsa-miR-10b*&organism=9606
hsa-miR-10b-3p	MIMAT0004556	hsa-miR-10b*	27291	C10orf28	-0.48	http://www.microrna.org/microrna/getMrna.do?gene=27291&matureName=hsa-miR-10b*&organism=9606
hsa-miR-10b-3p	MIMAT0004556	hsa-miR-10b*	165324	UBXN2A	-0.26	http://www.microrna.org/microrna/getMrna.do?gene=165324&matureName=hsa-miR-10b*&organism=9606
hsa-miR-10b-3p	MIMAT0004556	hsa-miR-10b*	93099	DMKN	-0.24	http://www.microrna.org/microrna/getMrna.do?gene=93099&matureName=hsa-miR-10b*&organism=9606
hsa-miR-10b-3p	MIMAT0004556	hsa-miR-10b*	3146	HMGB1	-0.19	http://www.microrna.org/microrna/getMrna.do?gene=3146&matureName=hsa-miR-10b*&organism=9606
hsa-miR-10b-3p	MIMAT0004556	hsa-miR-10b*	403341	ZBTB34	-0.54	http://www.microrna.org/microrna/getMrna.do?gene=403341&matureName=hsa-miR-10b*&organism=9606
hsa-miR-10b-3p	MIMAT0004556	hsa-miR-10b*	4001	LMNB1	-0.37	http://www.microrna.org/microrna/getMrna.do?gene=4001&matureName=hsa-miR-10b*&organism=9606
hsa-miR-10b-3p	MIMAT0004556	hsa-miR-10b*	1124	CHN2	-0.2	http://www.microrna.org/microrna/getMrna.do?gene=1124&matureName=hsa-miR-10b*&organism=9606
hsa-miR-10b-3p	MIMAT0004556	hsa-miR-10b*	199704	ZNF585A	-0.56	http://www.microrna.org/microrna/getMrna.do?gene=199704&matureName=hsa-miR-10b*&organism=9606
hsa-miR-10b-3p	MIMAT0004556	hsa-miR-10b*	5898	RALA	-0.72	http://www.microrna.org/microrna/getMrna.do?gene=5898&matureName=hsa-miR-10b*&organism=9606
hsa-miR-10b-3p	MIMAT0004556	hsa-miR-10b*	5898	RALA	-0.11	http://www.microrna.org/microrna/getMrna.do?gene=5898&matureName=hsa-miR-10b*&organism=9606
hsa-miR-10b-3p	MIMAT0004556	hsa-miR-10b*	51141	INSIG2	-0.14	http://www.microrna.org/microrna/getMrna.do?gene=51141&matureName=hsa-miR-10b*&organism=9606
hsa-miR-10b-3p	MIMAT0004556	hsa-miR-10b*	60685	ZFAND3	-0.27	http://www.microrna.org/microrna/getMrna.do?gene=60685&matureName=hsa-miR-10b*&organism=9606
hsa-miR-10b-3p	MIMAT0004556	hsa-miR-10b*	64745	METT11D1	-0.35	http://www.microrna.org/microrna/getMrna.do?gene=64745&matureName=hsa-miR-10b*&organism=9606
hsa-miR-10b-3p	MIMAT0004556	hsa-miR-10b*	8462	KLF11	-0.11	http://www.microrna.org/microrna/getMrna.do?gene=8462&matureName=hsa-miR-10b*&organism=9606
hsa-miR-10b-3p	MIMAT0004556	hsa-miR-10b*	23230	VPS13A	-1.02	http://www.microrna.org/microrna/getMrna.do?gene=23230&matureName=hsa-miR-10b*&organism=9606
hsa-miR-10b-3p	MIMAT0004556	hsa-miR-10b*	23230	VPS13A	-0.11	http://www.microrna.org/microrna/getMrna.do?gene=23230&matureName=hsa-miR-10b*&organism=9606
hsa-miR-10b-3p	MIMAT0004556	hsa-miR-10b*	23230	VPS13A	-0.44	http://www.microrna.org/microrna/getMrna.do?gene=23230&matureName=hsa-miR-10b*&organism=9606
hsa-miR-10b-3p	MIMAT0004556	hsa-miR-10b*	23126	POGZ	-0.82	http://www.microrna.org/microrna/getMrna.do?gene=23126&matureName=hsa-miR-10b*&organism=9606
hsa-miR-10b-3p	MIMAT0004556	hsa-miR-10b*	80063	ATF7IP2	-0.36	http://www.microrna.org/microrna/getMrna.do?gene=80063&matureName=hsa-miR-10b*&organism=9606
hsa-miR-10b-3p	MIMAT0004556	hsa-miR-10b*	9788	MTSS1	-0.39	http://www.microrna.org/microrna/getMrna.do?gene=9788&matureName=hsa-miR-10b*&organism=9606
hsa-miR-10b-3p	MIMAT0004556	hsa-miR-10b*	9788	MTSS1	-0.39	http://www.microrna.org/microrna/getMrna.do?gene=9788&matureName=hsa-miR-10b*&organism=9606
hsa-miR-10b-3p	MIMAT0004556	hsa-miR-10b*	22854	NTNG1	-0.1	http://www.microrna.org/microrna/getMrna.do?gene=22854&matureName=hsa-miR-10b*&organism=9606
hsa-miR-10b-3p	MIMAT0004556	hsa-miR-10b*	3113	HLA-DPA1	-0.25	http://www.microrna.org/microrna/getMrna.do?gene=3113&matureName=hsa-miR-10b*&organism=9606
hsa-miR-10b-3p	MIMAT0004556	hsa-miR-10b*	1073	CFL2	-0.75	http://www.microrna.org/microrna/getMrna.do?gene=1073&matureName=hsa-miR-10b*&organism=9606
hsa-miR-10b-3p	MIMAT0004556	hsa-miR-10b*	55816	DOK5	-0.82	http://www.microrna.org/microrna/getMrna.do?gene=55816&matureName=hsa-miR-10b*&organism=9606
hsa-miR-10b-3p	MIMAT0004556	hsa-miR-10b*	9659	PDE4DIP	-0.49	http://www.microrna.org/microrna/getMrna.do?gene=9659&matureName=hsa-miR-10b*&organism=9606
hsa-miR-10b-3p	MIMAT0004556	hsa-miR-10b*	161357	MDGA2	-0.67	http://www.microrna.org/microrna/getMrna.do?gene=161357&matureName=hsa-miR-10b*&organism=9606
hsa-miR-10b-3p	MIMAT0004556	hsa-miR-10b*	123283	TARSL2	-0.17	http://www.microrna.org/microrna/getMrna.do?gene=123283&matureName=hsa-miR-10b*&organism=9606
hsa-miR-10b-3p	MIMAT0004556	hsa-miR-10b*	64857	PLEKHG2	-0.17	http://www.microrna.org/microrna/getMrna.do?gene=64857&matureName=hsa-miR-10b*&organism=9606
hsa-miR-10b-3p	MIMAT0004556	hsa-miR-10b*	64857	PLEKHG2	-0.13	http://www.microrna.org/microrna/getMrna.do?gene=64857&matureName=hsa-miR-10b*&organism=9606
hsa-miR-10b-3p	MIMAT0004556	hsa-miR-10b*	6648	SOD2	-1.1	http://www.microrna.org/microrna/getMrna.do?gene=6648&matureName=hsa-miR-10b*&organism=9606
hsa-miR-10b-3p	MIMAT0004556	hsa-miR-10b*	64581	CLEC7A	-0.1	http://www.microrna.org/microrna/getMrna.do?gene=64581&matureName=hsa-miR-10b*&organism=9606
hsa-miR-10b-3p	MIMAT0004556	hsa-miR-10b*	64581	CLEC7A	-0.18	http://www.microrna.org/microrna/getMrna.do?gene=64581&matureName=hsa-miR-10b*&organism=9606
hsa-miR-10b-3p	MIMAT0004556	hsa-miR-10b*	26054	SENP6	-0.84	http://www.microrna.org/microrna/getMrna.do?gene=26054&matureName=hsa-miR-10b*&organism=9606
hsa-miR-10b-3p	MIMAT0004556	hsa-miR-10b*	285641	SLC36A3	-0.28	http://www.microrna.org/microrna/getMrna.do?gene=285641&matureName=hsa-miR-10b*&organism=9606
hsa-miR-10b-3p	MIMAT0004556	hsa-miR-10b*	654780	LOC654780	-0.11	http://www.microrna.org/microrna/getMrna.do?gene=654780&matureName=hsa-miR-10b*&organism=9606
hsa-miR-10b-3p	MIMAT0004556	hsa-miR-10b*	122042	RXFP2	-0.74	http://www.microrna.org/microrna/getMrna.do?gene=122042&matureName=hsa-miR-10b*&organism=9606
hsa-miR-10b-3p	MIMAT0004556	hsa-miR-10b*	6281	S100A10	-0.23	http://www.microrna.org/microrna/getMrna.do?gene=6281&matureName=hsa-miR-10b*&organism=9606
hsa-miR-10b-3p	MIMAT0004556	hsa-miR-10b*	84287	ZDHHC16	-0.63	http://www.microrna.org/microrna/getMrna.do?gene=84287&matureName=hsa-miR-10b*&organism=9606
hsa-miR-10b-3p	MIMAT0004556	hsa-miR-10b*	51105	PHF20L1	-0.86	http://www.microrna.org/microrna/getMrna.do?gene=51105&matureName=hsa-miR-10b*&organism=9606
hsa-miR-10b-3p	MIMAT0004556	hsa-miR-10b*	51105	PHF20L1	-0.46	http://www.microrna.org/microrna/getMrna.do?gene=51105&matureName=hsa-miR-10b*&organism=9606
hsa-miR-10b-3p	MIMAT0004556	hsa-miR-10b*	57819	LSM2	-0.2	http://www.microrna.org/microrna/getMrna.do?gene=57819&matureName=hsa-miR-10b*&organism=9606
hsa-miR-10b-3p	MIMAT0004556	hsa-miR-10b*	57185	NIPAL3	-0.11	http://www.microrna.org/microrna/getMrna.do?gene=57185&matureName=hsa-miR-10b*&organism=9606
hsa-miR-10b-3p	MIMAT0004556	hsa-miR-10b*	7403	KDM6A	-1.23	http://www.microrna.org/microrna/getMrna.do?gene=7403&matureName=hsa-miR-10b*&organism=9606
hsa-miR-10b-3p	MIMAT0004556	hsa-miR-10b*	7403	KDM6A	-0.43	http://www.microrna.org/microrna/getMrna.do?gene=7403&matureName=hsa-miR-10b*&organism=9606
hsa-miR-10b-3p	MIMAT0004556	hsa-miR-10b*	7403	KDM6A	-0.32	http://www.microrna.org/microrna/getMrna.do?gene=7403&matureName=hsa-miR-10b*&organism=9606
hsa-miR-10b-3p	MIMAT0004556	hsa-miR-10b*	3184	HNRNPD	-0.11	http://www.microrna.org/microrna/getMrna.do?gene=3184&matureName=hsa-miR-10b*&organism=9606
hsa-miR-10b-3p	MIMAT0004556	hsa-miR-10b*	3184	HNRNPD	-0.17	http://www.microrna.org/microrna/getMrna.do?gene=3184&matureName=hsa-miR-10b*&organism=9606
hsa-miR-10b-3p	MIMAT0004556	hsa-miR-10b*	11234	HPS5	-0.12	http://www.microrna.org/microrna/getMrna.do?gene=11234&matureName=hsa-miR-10b*&organism=9606
hsa-miR-10b-3p	MIMAT0004556	hsa-miR-10b*	51765	MST4	-0.14	http://www.microrna.org/microrna/getMrna.do?gene=51765&matureName=hsa-miR-10b*&organism=9606
hsa-miR-10b-3p	MIMAT0004556	hsa-miR-10b*	148898	C1orf213	-0.1	http://www.microrna.org/microrna/getMrna.do?gene=148898&matureName=hsa-miR-10b*&organism=9606
hsa-miR-10b-3p	MIMAT0004556	hsa-miR-10b*	254295	PHYHD1	-0.7	http://www.microrna.org/microrna/getMrna.do?gene=254295&matureName=hsa-miR-10b*&organism=9606
hsa-miR-10b-3p	MIMAT0004556	hsa-miR-10b*	10109	ARPC2	-0.15	http://www.microrna.org/microrna/getMrna.do?gene=10109&matureName=hsa-miR-10b*&organism=9606
hsa-miR-10b-3p	MIMAT0004556	hsa-miR-10b*	26095	PTPN20B	-0.12	http://www.microrna.org/microrna/getMrna.do?gene=26095&matureName=hsa-miR-10b*&organism=9606
hsa-miR-10b-3p	MIMAT0004556	hsa-miR-10b*	9627	SNCAIP	-0.1	http://www.microrna.org/microrna/getMrna.do?gene=9627&matureName=hsa-miR-10b*&organism=9606
hsa-miR-10b-3p	MIMAT0004556	hsa-miR-10b*	9627	SNCAIP	-1.08	http://www.microrna.org/microrna/getMrna.do?gene=9627&matureName=hsa-miR-10b*&organism=9606
hsa-miR-10b-3p	MIMAT0004556	hsa-miR-10b*	51030	FAM18B	-0.15	http://www.microrna.org/microrna/getMrna.do?gene=51030&matureName=hsa-miR-10b*&organism=9606
hsa-miR-10b-3p	MIMAT0004556	hsa-miR-10b*	83259	PCDH11Y	-1.2	http://www.microrna.org/microrna/getMrna.do?gene=83259&matureName=hsa-miR-10b*&organism=9606
hsa-miR-10b-3p	MIMAT0004556	hsa-miR-10b*	5664	PSEN2	-0.11	http://www.microrna.org/microrna/getMrna.do?gene=5664&matureName=hsa-miR-10b*&organism=9606
hsa-miR-10b-3p	MIMAT0004556	hsa-miR-10b*	26258	PLDN	-0.37	http://www.microrna.org/microrna/getMrna.do?gene=26258&matureName=hsa-miR-10b*&organism=9606
hsa-miR-10b-3p	MIMAT0004556	hsa-miR-10b*	26258	PLDN	-0.25	http://www.microrna.org/microrna/getMrna.do?gene=26258&matureName=hsa-miR-10b*&organism=9606
hsa-miR-10b-3p	MIMAT0004556	hsa-miR-10b*	717	C2	-0.15	http://www.microrna.org/microrna/getMrna.do?gene=717&matureName=hsa-miR-10b*&organism=9606
hsa-miR-10b-3p	MIMAT0004556	hsa-miR-10b*	546	ATRX	-0.84	http://www.microrna.org/microrna/getMrna.do?gene=546&matureName=hsa-miR-10b*&organism=9606
hsa-miR-10b-3p	MIMAT0004556	hsa-miR-10b*	783	CACNB2	-0.15	http://www.microrna.org/microrna/getMrna.do?gene=783&matureName=hsa-miR-10b*&organism=9606
hsa-miR-10b-3p	MIMAT0004556	hsa-miR-10b*	5529	PPP2R5E	-0.45	http://www.microrna.org/microrna/getMrna.do?gene=5529&matureName=hsa-miR-10b*&organism=9606
hsa-miR-10b-3p	MIMAT0004556	hsa-miR-10b*	79751	SLC25A22	-0.55	http://www.microrna.org/microrna/getMrna.do?gene=79751&matureName=hsa-miR-10b*&organism=9606
hsa-miR-10b-3p	MIMAT0004556	hsa-miR-10b*	857	CAV1	-0.12	http://www.microrna.org/microrna/getMrna.do?gene=857&matureName=hsa-miR-10b*&organism=9606
hsa-miR-10b-3p	MIMAT0004556	hsa-miR-10b*	57698	KIAA1598	-0.59	http://www.microrna.org/microrna/getMrna.do?gene=57698&matureName=hsa-miR-10b*&organism=9606
hsa-miR-10b-3p	MIMAT0004556	hsa-miR-10b*	57698	KIAA1598	-0.65	http://www.microrna.org/microrna/getMrna.do?gene=57698&matureName=hsa-miR-10b*&organism=9606
hsa-miR-10b-3p	MIMAT0004556	hsa-miR-10b*	3822	KLRC2	-0.23	http://www.microrna.org/microrna/getMrna.do?gene=3822&matureName=hsa-miR-10b*&organism=9606
hsa-miR-10b-3p	MIMAT0004556	hsa-miR-10b*	5168	ENPP2	-0.14	http://www.microrna.org/microrna/getMrna.do?gene=5168&matureName=hsa-miR-10b*&organism=9606
hsa-miR-10b-3p	MIMAT0004556	hsa-miR-10b*	353274	ZNF445	-0.21	http://www.microrna.org/microrna/getMrna.do?gene=353274&matureName=hsa-miR-10b*&organism=9606
hsa-miR-10b-3p	MIMAT0004556	hsa-miR-10b*	56658	TRIM39	-0.54	http://www.microrna.org/microrna/getMrna.do?gene=56658&matureName=hsa-miR-10b*&organism=9606
hsa-miR-10b-3p	MIMAT0004556	hsa-miR-10b*	124401	ANKS3	-0.65	http://www.microrna.org/microrna/getMrna.do?gene=124401&matureName=hsa-miR-10b*&organism=9606
hsa-miR-10b-3p	MIMAT0004556	hsa-miR-10b*	6045	RNF2	-0.12	http://www.microrna.org/microrna/getMrna.do?gene=6045&matureName=hsa-miR-10b*&organism=9606
hsa-miR-10b-3p	MIMAT0004556	hsa-miR-10b*	57722	IGDCC4	-0.14	http://www.microrna.org/microrna/getMrna.do?gene=57722&matureName=hsa-miR-10b*&organism=9606
hsa-miR-10b-3p	MIMAT0004556	hsa-miR-10b*	8295	TRRAP	-0.14	http://www.microrna.org/microrna/getMrna.do?gene=8295&matureName=hsa-miR-10b*&organism=9606
hsa-miR-10b-3p	MIMAT0004556	hsa-miR-10b*	9908	G3BP2	-0.15	http://www.microrna.org/microrna/getMrna.do?gene=9908&matureName=hsa-miR-10b*&organism=9606
hsa-miR-10b-3p	MIMAT0004556	hsa-miR-10b*	9908	G3BP2	-0.53	http://www.microrna.org/microrna/getMrna.do?gene=9908&matureName=hsa-miR-10b*&organism=9606
hsa-miR-10b-3p	MIMAT0004556	hsa-miR-10b*	132671	SPATA18	-0.1	http://www.microrna.org/microrna/getMrna.do?gene=132671&matureName=hsa-miR-10b*&organism=9606
hsa-miR-10b-3p	MIMAT0004556	hsa-miR-10b*	79668	PARP8	-0.3	http://www.microrna.org/microrna/getMrna.do?gene=79668&matureName=hsa-miR-10b*&organism=9606
hsa-miR-10b-3p	MIMAT0004556	hsa-miR-10b*	10590	SCGN	-0.11	http://www.microrna.org/microrna/getMrna.do?gene=10590&matureName=hsa-miR-10b*&organism=9606
hsa-miR-10b-3p	MIMAT0004556	hsa-miR-10b*	4101	MAGEA2	-0.35	http://www.microrna.org/microrna/getMrna.do?gene=4101&matureName=hsa-miR-10b*&organism=9606
hsa-miR-10b-3p	MIMAT0004556	hsa-miR-10b*	25890	ABI3BP	-0.23	http://www.microrna.org/microrna/getMrna.do?gene=25890&matureName=hsa-miR-10b*&organism=9606
hsa-miR-10b-3p	MIMAT0004556	hsa-miR-10b*	90011	KIR3DX1	-0.4	http://www.microrna.org/microrna/getMrna.do?gene=90011&matureName=hsa-miR-10b*&organism=9606
hsa-miR-10b-3p	MIMAT0004556	hsa-miR-10b*	10592	SMC2	-0.59	http://www.microrna.org/microrna/getMrna.do?gene=10592&matureName=hsa-miR-10b*&organism=9606
hsa-miR-10b-3p	MIMAT0004556	hsa-miR-10b*	10592	SMC2	-0.41	http://www.microrna.org/microrna/getMrna.do?gene=10592&matureName=hsa-miR-10b*&organism=9606
hsa-miR-10b-3p	MIMAT0004556	hsa-miR-10b*	128387	TATDN3	-0.87	http://www.microrna.org/microrna/getMrna.do?gene=128387&matureName=hsa-miR-10b*&organism=9606
hsa-miR-10b-3p	MIMAT0004556	hsa-miR-10b*	80351	TNKS2	-0.4	http://www.microrna.org/microrna/getMrna.do?gene=80351&matureName=hsa-miR-10b*&organism=9606
hsa-miR-10b-3p	MIMAT0004556	hsa-miR-10b*	80351	TNKS2	-0.15	http://www.microrna.org/microrna/getMrna.do?gene=80351&matureName=hsa-miR-10b*&organism=9606
hsa-miR-10b-3p	MIMAT0004556	hsa-miR-10b*	3750	KCND1	-0.2	http://www.microrna.org/microrna/getMrna.do?gene=3750&matureName=hsa-miR-10b*&organism=9606
hsa-miR-10b-3p	MIMAT0004556	hsa-miR-10b*	8459	TPST2	-0.28	http://www.microrna.org/microrna/getMrna.do?gene=8459&matureName=hsa-miR-10b*&organism=9606
hsa-miR-10b-3p	MIMAT0004556	hsa-miR-10b*	57498	KIDINS220	-0.21	http://www.microrna.org/microrna/getMrna.do?gene=57498&matureName=hsa-miR-10b*&organism=9606
hsa-miR-10b-3p	MIMAT0004556	hsa-miR-10b*	55278	QRSL1	-1.02	http://www.microrna.org/microrna/getMrna.do?gene=55278&matureName=hsa-miR-10b*&organism=9606
hsa-miR-10b-3p	MIMAT0004556	hsa-miR-10b*	8526	DGKE	-0.43	http://www.microrna.org/microrna/getMrna.do?gene=8526&matureName=hsa-miR-10b*&organism=9606
hsa-miR-10b-3p	MIMAT0004556	hsa-miR-10b*	6609	SMPD1	-0.69	http://www.microrna.org/microrna/getMrna.do?gene=6609&matureName=hsa-miR-10b*&organism=9606
hsa-miR-10b-3p	MIMAT0004556	hsa-miR-10b*	5787	PTPRB	-0.12	http://www.microrna.org/microrna/getMrna.do?gene=5787&matureName=hsa-miR-10b*&organism=9606
hsa-miR-10b-3p	MIMAT0004556	hsa-miR-10b*	91392	ZNF502	-0.36	http://www.microrna.org/microrna/getMrna.do?gene=91392&matureName=hsa-miR-10b*&organism=9606
hsa-miR-10b-3p	MIMAT0004556	hsa-miR-10b*	132204	SYNPR	-0.86	http://www.microrna.org/microrna/getMrna.do?gene=132204&matureName=hsa-miR-10b*&organism=9606
hsa-miR-10b-3p	MIMAT0004556	hsa-miR-10b*	3135	HLA-G	-1.29	http://www.microrna.org/microrna/getMrna.do?gene=3135&matureName=hsa-miR-10b*&organism=9606
hsa-miR-10b-3p	MIMAT0004556	hsa-miR-10b*	83690	CRISPLD1	-1.09	http://www.microrna.org/microrna/getMrna.do?gene=83690&matureName=hsa-miR-10b*&organism=9606
hsa-miR-10b-3p	MIMAT0004556	hsa-miR-10b*	83690	CRISPLD1	-1.2	http://www.microrna.org/microrna/getMrna.do?gene=83690&matureName=hsa-miR-10b*&organism=9606
hsa-miR-10b-3p	MIMAT0004556	hsa-miR-10b*	83690	CRISPLD1	-0.15	http://www.microrna.org/microrna/getMrna.do?gene=83690&matureName=hsa-miR-10b*&organism=9606
hsa-miR-10b-3p	MIMAT0004556	hsa-miR-10b*	83690	CRISPLD1	-0.13	http://www.microrna.org/microrna/getMrna.do?gene=83690&matureName=hsa-miR-10b*&organism=9606
hsa-miR-10b-3p	MIMAT0004556	hsa-miR-10b*	154007	SNRNP48	-0.21	http://www.microrna.org/microrna/getMrna.do?gene=154007&matureName=hsa-miR-10b*&organism=9606
hsa-miR-10b-3p	MIMAT0004556	hsa-miR-10b*	51773	RSF1	-0.48	http://www.microrna.org/microrna/getMrna.do?gene=51773&matureName=hsa-miR-10b*&organism=9606
hsa-miR-10b-3p	MIMAT0004556	hsa-miR-10b*	10396	ATP8A1	-0.24	http://www.microrna.org/microrna/getMrna.do?gene=10396&matureName=hsa-miR-10b*&organism=9606
hsa-miR-10b-3p	MIMAT0004556	hsa-miR-10b*	54984	PINX1	-0.22	http://www.microrna.org/microrna/getMrna.do?gene=54984&matureName=hsa-miR-10b*&organism=9606
hsa-miR-10b-3p	MIMAT0004556	hsa-miR-10b*	64849	SLC13A3	-0.38	http://www.microrna.org/microrna/getMrna.do?gene=64849&matureName=hsa-miR-10b*&organism=9606
hsa-miR-10b-3p	MIMAT0004556	hsa-miR-10b*	100289635	ZNF605	-0.14	http://www.microrna.org/microrna/getMrna.do?gene=100289635&matureName=hsa-miR-10b*&organism=9606
hsa-miR-10b-3p	MIMAT0004556	hsa-miR-10b*	4314	MMP3	-0.5	http://www.microrna.org/microrna/getMrna.do?gene=4314&matureName=hsa-miR-10b*&organism=9606
hsa-miR-10b-3p	MIMAT0004556	hsa-miR-10b*	5742	PTGS1	-0.1	http://www.microrna.org/microrna/getMrna.do?gene=5742&matureName=hsa-miR-10b*&organism=9606
hsa-miR-10b-3p	MIMAT0004556	hsa-miR-10b*	168448	CDC14C	-0.7	http://www.microrna.org/microrna/getMrna.do?gene=168448&matureName=hsa-miR-10b*&organism=9606
hsa-miR-10b-3p	MIMAT0004556	hsa-miR-10b*	10657	KHDRBS1	-0.12	http://www.microrna.org/microrna/getMrna.do?gene=10657&matureName=hsa-miR-10b*&organism=9606
hsa-miR-10b-3p	MIMAT0004556	hsa-miR-10b*	6557	SLC12A1	-0.11	http://www.microrna.org/microrna/getMrna.do?gene=6557&matureName=hsa-miR-10b*&organism=9606
hsa-miR-10b-3p	MIMAT0004556	hsa-miR-10b*	2273	FHL1	-0.33	http://www.microrna.org/microrna/getMrna.do?gene=2273&matureName=hsa-miR-10b*&organism=9606
hsa-miR-10b-3p	MIMAT0004556	hsa-miR-10b*	79888	LPCAT1	-0.82	http://www.microrna.org/microrna/getMrna.do?gene=79888&matureName=hsa-miR-10b*&organism=9606
hsa-miR-10b-3p	MIMAT0004556	hsa-miR-10b*	50650	ARHGEF3	-0.26	http://www.microrna.org/microrna/getMrna.do?gene=50650&matureName=hsa-miR-10b*&organism=9606
hsa-miR-10b-3p	MIMAT0004556	hsa-miR-10b*	50650	ARHGEF3	-0.2	http://www.microrna.org/microrna/getMrna.do?gene=50650&matureName=hsa-miR-10b*&organism=9606
hsa-miR-10b-3p	MIMAT0004556	hsa-miR-10b*	50650	ARHGEF3	-0.1	http://www.microrna.org/microrna/getMrna.do?gene=50650&matureName=hsa-miR-10b*&organism=9606
hsa-miR-10b-3p	MIMAT0004556	hsa-miR-10b*	128989	C22orf25	-0.35	http://www.microrna.org/microrna/getMrna.do?gene=128989&matureName=hsa-miR-10b*&organism=9606
hsa-miR-10b-3p	MIMAT0004556	hsa-miR-10b*	254251	LCORL	-0.46	http://www.microrna.org/microrna/getMrna.do?gene=254251&matureName=hsa-miR-10b*&organism=9606
hsa-miR-10b-3p	MIMAT0004556	hsa-miR-10b*	338699	ANKRD42	-0.38	http://www.microrna.org/microrna/getMrna.do?gene=338699&matureName=hsa-miR-10b*&organism=9606
hsa-miR-10b-3p	MIMAT0004556	hsa-miR-10b*	22911	WDR47	-0.11	http://www.microrna.org/microrna/getMrna.do?gene=22911&matureName=hsa-miR-10b*&organism=9606
hsa-miR-10b-3p	MIMAT0004556	hsa-miR-10b*	1745	DLX1	-0.11	http://www.microrna.org/microrna/getMrna.do?gene=1745&matureName=hsa-miR-10b*&organism=9606
hsa-miR-10b-3p	MIMAT0004556	hsa-miR-10b*	81789	TIGD6	-0.17	http://www.microrna.org/microrna/getMrna.do?gene=81789&matureName=hsa-miR-10b*&organism=9606
hsa-miR-10b-3p	MIMAT0004556	hsa-miR-10b*	1496	CTNNA2	-0.14	http://www.microrna.org/microrna/getMrna.do?gene=1496&matureName=hsa-miR-10b*&organism=9606
hsa-miR-10b-3p	MIMAT0004556	hsa-miR-10b*	1496	CTNNA2	-0.13	http://www.microrna.org/microrna/getMrna.do?gene=1496&matureName=hsa-miR-10b*&organism=9606
hsa-miR-10b-3p	MIMAT0004556	hsa-miR-10b*	6239	RREB1	-0.35	http://www.microrna.org/microrna/getMrna.do?gene=6239&matureName=hsa-miR-10b*&organism=9606
hsa-miR-10b-3p	MIMAT0004556	hsa-miR-10b*	7343	UBTF	-0.27	http://www.microrna.org/microrna/getMrna.do?gene=7343&matureName=hsa-miR-10b*&organism=9606
hsa-miR-10b-3p	MIMAT0004556	hsa-miR-10b*	80760	ITIH5	-0.13	http://www.microrna.org/microrna/getMrna.do?gene=80760&matureName=hsa-miR-10b*&organism=9606
hsa-miR-10b-3p	MIMAT0004556	hsa-miR-10b*	286434	LOC286434	-0.19	http://www.microrna.org/microrna/getMrna.do?gene=286434&matureName=hsa-miR-10b*&organism=9606
hsa-miR-10b-3p	MIMAT0004556	hsa-miR-10b*	285521	COX18	-0.36	http://www.microrna.org/microrna/getMrna.do?gene=285521&matureName=hsa-miR-10b*&organism=9606
hsa-miR-10b-3p	MIMAT0004556	hsa-miR-10b*	23479	ISCU	-0.65	http://www.microrna.org/microrna/getMrna.do?gene=23479&matureName=hsa-miR-10b*&organism=9606
hsa-miR-10b-3p	MIMAT0004556	hsa-miR-10b*	23479	ISCU	-0.21	http://www.microrna.org/microrna/getMrna.do?gene=23479&matureName=hsa-miR-10b*&organism=9606
hsa-miR-10b-3p	MIMAT0004556	hsa-miR-10b*	100131755	ARMCX4	-0.12	http://www.microrna.org/microrna/getMrna.do?gene=100131755&matureName=hsa-miR-10b*&organism=9606
hsa-miR-10b-3p	MIMAT0004556	hsa-miR-10b*	8555	CDC14B	-0.49	http://www.microrna.org/microrna/getMrna.do?gene=8555&matureName=hsa-miR-10b*&organism=9606
hsa-miR-10b-3p	MIMAT0004556	hsa-miR-10b*	285051	C2orf61	-0.17	http://www.microrna.org/microrna/getMrna.do?gene=285051&matureName=hsa-miR-10b*&organism=9606
hsa-miR-10b-3p	MIMAT0004556	hsa-miR-10b*	285051	C2orf61	-0.12	http://www.microrna.org/microrna/getMrna.do?gene=285051&matureName=hsa-miR-10b*&organism=9606
hsa-miR-10b-3p	MIMAT0004556	hsa-miR-10b*	57447	NDRG2	-0.46	http://www.microrna.org/microrna/getMrna.do?gene=57447&matureName=hsa-miR-10b*&organism=9606
hsa-miR-10b-3p	MIMAT0004556	hsa-miR-10b*	10659	CELF2	-0.29	http://www.microrna.org/microrna/getMrna.do?gene=10659&matureName=hsa-miR-10b*&organism=9606
hsa-miR-10b-3p	MIMAT0004556	hsa-miR-10b*	10810	WASF3	-0.27	http://www.microrna.org/microrna/getMrna.do?gene=10810&matureName=hsa-miR-10b*&organism=9606
hsa-miR-10b-3p	MIMAT0004556	hsa-miR-10b*	10810	WASF3	-0.1	http://www.microrna.org/microrna/getMrna.do?gene=10810&matureName=hsa-miR-10b*&organism=9606
hsa-miR-10b-3p	MIMAT0004556	hsa-miR-10b*	8926	SNURF	-1.17	http://www.microrna.org/microrna/getMrna.do?gene=8926&matureName=hsa-miR-10b*&organism=9606
hsa-miR-10b-3p	MIMAT0004556	hsa-miR-10b*	5648	MASP1	-1.22	http://www.microrna.org/microrna/getMrna.do?gene=5648&matureName=hsa-miR-10b*&organism=9606
hsa-miR-10b-3p	MIMAT0004556	hsa-miR-10b*	64843	ISL2	-0.31	http://www.microrna.org/microrna/getMrna.do?gene=64843&matureName=hsa-miR-10b*&organism=9606
hsa-miR-10b-3p	MIMAT0004556	hsa-miR-10b*	213	ALB	-0.36	http://www.microrna.org/microrna/getMrna.do?gene=213&matureName=hsa-miR-10b*&organism=9606
hsa-miR-10b-3p	MIMAT0004556	hsa-miR-10b*	29803	REPIN1	-1.15	http://www.microrna.org/microrna/getMrna.do?gene=29803&matureName=hsa-miR-10b*&organism=9606
hsa-miR-10b-3p	MIMAT0004556	hsa-miR-10b*	60491	NIF3L1	-0.27	http://www.microrna.org/microrna/getMrna.do?gene=60491&matureName=hsa-miR-10b*&organism=9606
hsa-miR-10b-3p	MIMAT0004556	hsa-miR-10b*	221527	ZBTB12	-0.22	http://www.microrna.org/microrna/getMrna.do?gene=221527&matureName=hsa-miR-10b*&organism=9606
hsa-miR-10b-3p	MIMAT0004556	hsa-miR-10b*	441072	FLJ31104	-0.21	http://www.microrna.org/microrna/getMrna.do?gene=441072&matureName=hsa-miR-10b*&organism=9606
hsa-miR-10b-3p	MIMAT0004556	hsa-miR-10b*	1576	CYP3A4	-0.89	http://www.microrna.org/microrna/getMrna.do?gene=1576&matureName=hsa-miR-10b*&organism=9606
hsa-miR-10b-3p	MIMAT0004556	hsa-miR-10b*	10198	MPHOSPH9	-0.18	http://www.microrna.org/microrna/getMrna.do?gene=10198&matureName=hsa-miR-10b*&organism=9606
hsa-miR-10b-3p	MIMAT0004556	hsa-miR-10b*	10198	MPHOSPH9	-0.12	http://www.microrna.org/microrna/getMrna.do?gene=10198&matureName=hsa-miR-10b*&organism=9606
hsa-miR-10b-3p	MIMAT0004556	hsa-miR-10b*	375611	SLC26A5	-0.18	http://www.microrna.org/microrna/getMrna.do?gene=375611&matureName=hsa-miR-10b*&organism=9606
hsa-miR-10b-3p	MIMAT0004556	hsa-miR-10b*	375611	SLC26A5	-0.2	http://www.microrna.org/microrna/getMrna.do?gene=375611&matureName=hsa-miR-10b*&organism=9606
hsa-miR-10b-3p	MIMAT0004556	hsa-miR-10b*	6487	ST3GAL3	-0.68	http://www.microrna.org/microrna/getMrna.do?gene=6487&matureName=hsa-miR-10b*&organism=9606
hsa-miR-10b-3p	MIMAT0004556	hsa-miR-10b*	90203	SNX21	-0.93	http://www.microrna.org/microrna/getMrna.do?gene=90203&matureName=hsa-miR-10b*&organism=9606
hsa-miR-10b-3p	MIMAT0004556	hsa-miR-10b*	51742	ARID4B	-0.1	http://www.microrna.org/microrna/getMrna.do?gene=51742&matureName=hsa-miR-10b*&organism=9606
hsa-miR-10b-3p	MIMAT0004556	hsa-miR-10b*	57213	C13orf1	-0.34	http://www.microrna.org/microrna/getMrna.do?gene=57213&matureName=hsa-miR-10b*&organism=9606
hsa-miR-10b-3p	MIMAT0004556	hsa-miR-10b*	8189	SYMPK	-0.58	http://www.microrna.org/microrna/getMrna.do?gene=8189&matureName=hsa-miR-10b*&organism=9606
hsa-miR-10b-3p	MIMAT0004556	hsa-miR-10b*	7311	UBA52	-0.3	http://www.microrna.org/microrna/getMrna.do?gene=7311&matureName=hsa-miR-10b*&organism=9606
hsa-miR-10b-3p	MIMAT0004556	hsa-miR-10b*	2070	EYA4	-0.92	http://www.microrna.org/microrna/getMrna.do?gene=2070&matureName=hsa-miR-10b*&organism=9606
hsa-miR-10b-3p	MIMAT0004556	hsa-miR-10b*	221178	SPATA13	-0.35	http://www.microrna.org/microrna/getMrna.do?gene=221178&matureName=hsa-miR-10b*&organism=9606
hsa-miR-10b-3p	MIMAT0004556	hsa-miR-10b*	6500	SKP1	-0.94	http://www.microrna.org/microrna/getMrna.do?gene=6500&matureName=hsa-miR-10b*&organism=9606
hsa-miR-10b-3p	MIMAT0004556	hsa-miR-10b*	7813	EVI5	-0.1	http://www.microrna.org/microrna/getMrna.do?gene=7813&matureName=hsa-miR-10b*&organism=9606
hsa-miR-10b-3p	MIMAT0004556	hsa-miR-10b*	7111	TMOD1	-0.98	http://www.microrna.org/microrna/getMrna.do?gene=7111&matureName=hsa-miR-10b*&organism=9606
hsa-miR-10b-3p	MIMAT0004556	hsa-miR-10b*	60436	TGIF2	-0.15	http://www.microrna.org/microrna/getMrna.do?gene=60436&matureName=hsa-miR-10b*&organism=9606
hsa-miR-10b-3p	MIMAT0004556	hsa-miR-10b*	1241	LTB4R	-0.92	http://www.microrna.org/microrna/getMrna.do?gene=1241&matureName=hsa-miR-10b*&organism=9606
hsa-miR-10b-3p	MIMAT0004556	hsa-miR-10b*	5915	RARB	-0.69	http://www.microrna.org/microrna/getMrna.do?gene=5915&matureName=hsa-miR-10b*&organism=9606
hsa-miR-10b-3p	MIMAT0004556	hsa-miR-10b*	9093	DNAJA3	-0.21	http://www.microrna.org/microrna/getMrna.do?gene=9093&matureName=hsa-miR-10b*&organism=9606
hsa-miR-10b-3p	MIMAT0004556	hsa-miR-10b*	342184	FMN1	-0.94	http://www.microrna.org/microrna/getMrna.do?gene=342184&matureName=hsa-miR-10b*&organism=9606
hsa-miR-10b-3p	MIMAT0004556	hsa-miR-10b*	653129	PTPN20A	-0.12	http://www.microrna.org/microrna/getMrna.do?gene=653129&matureName=hsa-miR-10b*&organism=9606
hsa-miR-10b-3p	MIMAT0004556	hsa-miR-10b*	286827	TRIM59	-0.15	http://www.microrna.org/microrna/getMrna.do?gene=286827&matureName=hsa-miR-10b*&organism=9606
hsa-miR-10b-3p	MIMAT0004556	hsa-miR-10b*	9753	ZSCAN12	-0.16	http://www.microrna.org/microrna/getMrna.do?gene=9753&matureName=hsa-miR-10b*&organism=9606
hsa-miR-10b-3p	MIMAT0004556	hsa-miR-10b*	901	CCNG2	-0.17	http://www.microrna.org/microrna/getMrna.do?gene=901&matureName=hsa-miR-10b*&organism=9606
hsa-miR-10b-3p	MIMAT0004556	hsa-miR-10b*	3845	KRAS	-0.14	http://www.microrna.org/microrna/getMrna.do?gene=3845&matureName=hsa-miR-10b*&organism=9606
hsa-miR-10b-3p	MIMAT0004556	hsa-miR-10b*	51534	VTA1	-1.05	http://www.microrna.org/microrna/getMrna.do?gene=51534&matureName=hsa-miR-10b*&organism=9606
hsa-miR-10b-3p	MIMAT0004556	hsa-miR-10b*	8028	MLLT10	-1.29	http://www.microrna.org/microrna/getMrna.do?gene=8028&matureName=hsa-miR-10b*&organism=9606
hsa-miR-10b-3p	MIMAT0004556	hsa-miR-10b*	9882	TBC1D4	-0.2	http://www.microrna.org/microrna/getMrna.do?gene=9882&matureName=hsa-miR-10b*&organism=9606
hsa-miR-10b-3p	MIMAT0004556	hsa-miR-10b*	55692	LUC7L	-0.1	http://www.microrna.org/microrna/getMrna.do?gene=55692&matureName=hsa-miR-10b*&organism=9606
hsa-miR-10b-3p	MIMAT0004556	hsa-miR-10b*	6744	SSFA2	-0.11	http://www.microrna.org/microrna/getMrna.do?gene=6744&matureName=hsa-miR-10b*&organism=9606
hsa-miR-10b-3p	MIMAT0004556	hsa-miR-10b*	30820	KCNIP1	-0.59	http://www.microrna.org/microrna/getMrna.do?gene=30820&matureName=hsa-miR-10b*&organism=9606
hsa-miR-10b-3p	MIMAT0004556	hsa-miR-10b*	6397	SEC14L1	-0.15	http://www.microrna.org/microrna/getMrna.do?gene=6397&matureName=hsa-miR-10b*&organism=9606
hsa-miR-10b-3p	MIMAT0004556	hsa-miR-10b*	730094	C16orf52	-0.19	http://www.microrna.org/microrna/getMrna.do?gene=730094&matureName=hsa-miR-10b*&organism=9606
hsa-miR-10b-3p	MIMAT0004556	hsa-miR-10b*	8869	ST3GAL5	-0.36	http://www.microrna.org/microrna/getMrna.do?gene=8869&matureName=hsa-miR-10b*&organism=9606
hsa-miR-10b-3p	MIMAT0004556	hsa-miR-10b*	284111	SLC13A5	-0.34	http://www.microrna.org/microrna/getMrna.do?gene=284111&matureName=hsa-miR-10b*&organism=9606
hsa-miR-10b-3p	MIMAT0004556	hsa-miR-10b*	7071	KLF10	-0.37	http://www.microrna.org/microrna/getMrna.do?gene=7071&matureName=hsa-miR-10b*&organism=9606
hsa-miR-10b-3p	MIMAT0004556	hsa-miR-10b*	7071	KLF10	-0.11	http://www.microrna.org/microrna/getMrna.do?gene=7071&matureName=hsa-miR-10b*&organism=9606
hsa-miR-10b-3p	MIMAT0004556	hsa-miR-10b*	2196	FAT2	-0.32	http://www.microrna.org/microrna/getMrna.do?gene=2196&matureName=hsa-miR-10b*&organism=9606
hsa-miR-10b-3p	MIMAT0004556	hsa-miR-10b*	6670	SP3	-0.12	http://www.microrna.org/microrna/getMrna.do?gene=6670&matureName=hsa-miR-10b*&organism=9606
hsa-miR-10b-3p	MIMAT0004556	hsa-miR-10b*	401251	C6orf26	-0.76	http://www.microrna.org/microrna/getMrna.do?gene=401251&matureName=hsa-miR-10b*&organism=9606
hsa-miR-10b-3p	MIMAT0004556	hsa-miR-10b*	401251	C6orf26	-0.12	http://www.microrna.org/microrna/getMrna.do?gene=401251&matureName=hsa-miR-10b*&organism=9606
hsa-miR-10b-3p	MIMAT0004556	hsa-miR-10b*	9941	EXOG	-0.46	http://www.microrna.org/microrna/getMrna.do?gene=9941&matureName=hsa-miR-10b*&organism=9606
hsa-miR-10b-3p	MIMAT0004556	hsa-miR-10b*	9941	EXOG	-0.4	http://www.microrna.org/microrna/getMrna.do?gene=9941&matureName=hsa-miR-10b*&organism=9606
hsa-miR-10b-3p	MIMAT0004556	hsa-miR-10b*	65217	PCDH15	-0.63	http://www.microrna.org/microrna/getMrna.do?gene=65217&matureName=hsa-miR-10b*&organism=9606
hsa-miR-10b-3p	MIMAT0004556	hsa-miR-10b*	143570	XRRA1	-0.15	http://www.microrna.org/microrna/getMrna.do?gene=143570&matureName=hsa-miR-10b*&organism=9606
hsa-miR-10b-3p	MIMAT0004556	hsa-miR-10b*	54934	C12orf41	-0.22	http://www.microrna.org/microrna/getMrna.do?gene=54934&matureName=hsa-miR-10b*&organism=9606
hsa-miR-10b-3p	MIMAT0004556	hsa-miR-10b*	4293	MAP3K9	-0.11	http://www.microrna.org/microrna/getMrna.do?gene=4293&matureName=hsa-miR-10b*&organism=9606
hsa-miR-10b-3p	MIMAT0004556	hsa-miR-10b*	25797	QPCT	-0.27	http://www.microrna.org/microrna/getMrna.do?gene=25797&matureName=hsa-miR-10b*&organism=9606
hsa-miR-10b-3p	MIMAT0004556	hsa-miR-10b*	64766	S100PBP	-0.52	http://www.microrna.org/microrna/getMrna.do?gene=64766&matureName=hsa-miR-10b*&organism=9606
hsa-miR-10b-3p	MIMAT0004556	hsa-miR-10b*	64766	S100PBP	-0.15	http://www.microrna.org/microrna/getMrna.do?gene=64766&matureName=hsa-miR-10b*&organism=9606
hsa-miR-10b-3p	MIMAT0004556	hsa-miR-10b*	64766	S100PBP	-0.11	http://www.microrna.org/microrna/getMrna.do?gene=64766&matureName=hsa-miR-10b*&organism=9606
hsa-miR-10b-3p	MIMAT0004556	hsa-miR-10b*	27030	MLH3	-0.25	http://www.microrna.org/microrna/getMrna.do?gene=27030&matureName=hsa-miR-10b*&organism=9606
hsa-miR-10b-3p	MIMAT0004556	hsa-miR-10b*	7124	TNF	-0.26	http://www.microrna.org/microrna/getMrna.do?gene=7124&matureName=hsa-miR-10b*&organism=9606
hsa-miR-10b-3p	MIMAT0004556	hsa-miR-10b*	271	AMPD2	-0.27	http://www.microrna.org/microrna/getMrna.do?gene=271&matureName=hsa-miR-10b*&organism=9606
hsa-miR-10b-3p	MIMAT0004556	hsa-miR-10b*	80309	SPHKAP	-0.12	http://www.microrna.org/microrna/getMrna.do?gene=80309&matureName=hsa-miR-10b*&organism=9606
hsa-miR-10b-3p	MIMAT0004556	hsa-miR-10b*	728340	GTF2H2C	-0.25	http://www.microrna.org/microrna/getMrna.do?gene=728340&matureName=hsa-miR-10b*&organism=9606
hsa-miR-10b-3p	MIMAT0004556	hsa-miR-10b*	728340	GTF2H2C	-0.14	http://www.microrna.org/microrna/getMrna.do?gene=728340&matureName=hsa-miR-10b*&organism=9606
hsa-miR-10b-3p	MIMAT0004556	hsa-miR-10b*	1894	ECT2	-0.97	http://www.microrna.org/microrna/getMrna.do?gene=1894&matureName=hsa-miR-10b*&organism=9606
hsa-miR-10b-3p	MIMAT0004556	hsa-miR-10b*	1894	ECT2	-0.92	http://www.microrna.org/microrna/getMrna.do?gene=1894&matureName=hsa-miR-10b*&organism=9606
hsa-miR-10b-3p	MIMAT0004556	hsa-miR-10b*	23302	WSCD1	-0.61	http://www.microrna.org/microrna/getMrna.do?gene=23302&matureName=hsa-miR-10b*&organism=9606
hsa-miR-10b-3p	MIMAT0004556	hsa-miR-10b*	830	CAPZA2	-1.16	http://www.microrna.org/microrna/getMrna.do?gene=830&matureName=hsa-miR-10b*&organism=9606
hsa-miR-10b-3p	MIMAT0004556	hsa-miR-10b*	56990	CDC42SE2	-0.16	http://www.microrna.org/microrna/getMrna.do?gene=56990&matureName=hsa-miR-10b*&organism=9606
hsa-miR-10b-3p	MIMAT0004556	hsa-miR-10b*	9871	SEC24D	-0.76	http://www.microrna.org/microrna/getMrna.do?gene=9871&matureName=hsa-miR-10b*&organism=9606
hsa-miR-10b-3p	MIMAT0004556	hsa-miR-10b*	552900	BOLA2	-0.6	http://www.microrna.org/microrna/getMrna.do?gene=552900&matureName=hsa-miR-10b*&organism=9606
hsa-miR-10b-3p	MIMAT0004556	hsa-miR-10b*	51056	LAP3	-0.16	http://www.microrna.org/microrna/getMrna.do?gene=51056&matureName=hsa-miR-10b*&organism=9606
hsa-miR-10b-3p	MIMAT0004556	hsa-miR-10b*	64863	METTL4	-0.6	http://www.microrna.org/microrna/getMrna.do?gene=64863&matureName=hsa-miR-10b*&organism=9606
hsa-miR-10b-3p	MIMAT0004556	hsa-miR-10b*	130507	UBR3	-0.88	http://www.microrna.org/microrna/getMrna.do?gene=130507&matureName=hsa-miR-10b*&organism=9606
hsa-miR-10b-3p	MIMAT0004556	hsa-miR-10b*	55716	LMBR1L	-0.49	http://www.microrna.org/microrna/getMrna.do?gene=55716&matureName=hsa-miR-10b*&organism=9606
hsa-miR-10b-3p	MIMAT0004556	hsa-miR-10b*	9681	DEPDC5	-0.16	http://www.microrna.org/microrna/getMrna.do?gene=9681&matureName=hsa-miR-10b*&organism=9606
hsa-miR-10b-3p	MIMAT0004556	hsa-miR-10b*	55662	HIF1AN	-0.24	http://www.microrna.org/microrna/getMrna.do?gene=55662&matureName=hsa-miR-10b*&organism=9606
hsa-miR-10b-3p	MIMAT0004556	hsa-miR-10b*	79712	GTDC1	-0.13	http://www.microrna.org/microrna/getMrna.do?gene=79712&matureName=hsa-miR-10b*&organism=9606
hsa-miR-10b-3p	MIMAT0004556	hsa-miR-10b*	2918	GRM8	-0.19	http://www.microrna.org/microrna/getMrna.do?gene=2918&matureName=hsa-miR-10b*&organism=9606
hsa-miR-10b-3p	MIMAT0004556	hsa-miR-10b*	4074	M6PR	-0.55	http://www.microrna.org/microrna/getMrna.do?gene=4074&matureName=hsa-miR-10b*&organism=9606
hsa-miR-10b-3p	MIMAT0004556	hsa-miR-10b*	55766	H2AFJ	-0.21	http://www.microrna.org/microrna/getMrna.do?gene=55766&matureName=hsa-miR-10b*&organism=9606
hsa-miR-10b-3p	MIMAT0004556	hsa-miR-10b*	23097	CDK19	-0.34	http://www.microrna.org/microrna/getMrna.do?gene=23097&matureName=hsa-miR-10b*&organism=9606
hsa-miR-10b-3p	MIMAT0004556	hsa-miR-10b*	54332	GDAP1	-0.21	http://www.microrna.org/microrna/getMrna.do?gene=54332&matureName=hsa-miR-10b*&organism=9606
hsa-miR-10b-3p	MIMAT0004556	hsa-miR-10b*	54332	GDAP1	-0.37	http://www.microrna.org/microrna/getMrna.do?gene=54332&matureName=hsa-miR-10b*&organism=9606
hsa-miR-10b-3p	MIMAT0004556	hsa-miR-10b*	90024	FLJ20021	-0.2	http://www.microrna.org/microrna/getMrna.do?gene=90024&matureName=hsa-miR-10b*&organism=9606
hsa-miR-10b-3p	MIMAT0004556	hsa-miR-10b*	202018	TAPT1	-0.22	http://www.microrna.org/microrna/getMrna.do?gene=202018&matureName=hsa-miR-10b*&organism=9606
hsa-miR-10b-3p	MIMAT0004556	hsa-miR-10b*	81797	OR12D3	-0.16	http://www.microrna.org/microrna/getMrna.do?gene=81797&matureName=hsa-miR-10b*&organism=9606
hsa-miR-10b-3p	MIMAT0004556	hsa-miR-10b*	604	BCL6	-0.17	http://www.microrna.org/microrna/getMrna.do?gene=604&matureName=hsa-miR-10b*&organism=9606
hsa-miR-10b-3p	MIMAT0004556	hsa-miR-10b*	604	BCL6	-0.3	http://www.microrna.org/microrna/getMrna.do?gene=604&matureName=hsa-miR-10b*&organism=9606
hsa-miR-10b-3p	MIMAT0004556	hsa-miR-10b*	5167	ENPP1	-0.31	http://www.microrna.org/microrna/getMrna.do?gene=5167&matureName=hsa-miR-10b*&organism=9606
hsa-miR-10b-3p	MIMAT0004556	hsa-miR-10b*	4102	MAGEA3	-0.21	http://www.microrna.org/microrna/getMrna.do?gene=4102&matureName=hsa-miR-10b*&organism=9606
hsa-miR-10b-3p	MIMAT0004556	hsa-miR-10b*	152503	SH3D19	-0.91	http://www.microrna.org/microrna/getMrna.do?gene=152503&matureName=hsa-miR-10b*&organism=9606
hsa-miR-10b-3p	MIMAT0004556	hsa-miR-10b*	401264	FLJ37798	-0.53	http://www.microrna.org/microrna/getMrna.do?gene=401264&matureName=hsa-miR-10b*&organism=9606
hsa-miR-10b-3p	MIMAT0004556	hsa-miR-10b*	63930	LOC63930	-0.13	http://www.microrna.org/microrna/getMrna.do?gene=63930&matureName=hsa-miR-10b*&organism=9606
hsa-miR-10b-3p	MIMAT0004556	hsa-miR-10b*	6641	SNTB1	-0.58	http://www.microrna.org/microrna/getMrna.do?gene=6641&matureName=hsa-miR-10b*&organism=9606
hsa-miR-10b-3p	MIMAT0004556	hsa-miR-10b*	3696	ITGB8	-0.51	http://www.microrna.org/microrna/getMrna.do?gene=3696&matureName=hsa-miR-10b*&organism=9606
hsa-miR-10b-3p	MIMAT0004556	hsa-miR-10b*	1743	DLST	-0.52	http://www.microrna.org/microrna/getMrna.do?gene=1743&matureName=hsa-miR-10b*&organism=9606
hsa-miR-10b-3p	MIMAT0004556	hsa-miR-10b*	3802	KIR2DL1	-0.26	http://www.microrna.org/microrna/getMrna.do?gene=3802&matureName=hsa-miR-10b*&organism=9606
hsa-miR-10b-3p	MIMAT0004556	hsa-miR-10b*	11201	POLI	-0.29	http://www.microrna.org/microrna/getMrna.do?gene=11201&matureName=hsa-miR-10b*&organism=9606
hsa-miR-10b-3p	MIMAT0004556	hsa-miR-10b*	284942	RPL23AP82	-0.11	http://www.microrna.org/microrna/getMrna.do?gene=284942&matureName=hsa-miR-10b*&organism=9606
hsa-miR-10b-3p	MIMAT0004556	hsa-miR-10b*	64149	C17orf75	-0.28	http://www.microrna.org/microrna/getMrna.do?gene=64149&matureName=hsa-miR-10b*&organism=9606
hsa-miR-10b-3p	MIMAT0004556	hsa-miR-10b*	146540	ZNF785	-0.15	http://www.microrna.org/microrna/getMrna.do?gene=146540&matureName=hsa-miR-10b*&organism=9606
hsa-miR-10b-3p	MIMAT0004556	hsa-miR-10b*	4253	CTAGE5	-0.59	http://www.microrna.org/microrna/getMrna.do?gene=4253&matureName=hsa-miR-10b*&organism=9606
hsa-miR-10b-3p	MIMAT0004556	hsa-miR-10b*	4253	CTAGE5	-0.8	http://www.microrna.org/microrna/getMrna.do?gene=4253&matureName=hsa-miR-10b*&organism=9606
hsa-miR-10b-3p	MIMAT0004556	hsa-miR-10b*	22955	SCMH1	-0.46	http://www.microrna.org/microrna/getMrna.do?gene=22955&matureName=hsa-miR-10b*&organism=9606
hsa-miR-10b-3p	MIMAT0004556	hsa-miR-10b*	6453	ITSN1	-0.13	http://www.microrna.org/microrna/getMrna.do?gene=6453&matureName=hsa-miR-10b*&organism=9606
hsa-miR-10b-3p	MIMAT0004556	hsa-miR-10b*	197187	MGC23284	-0.43	http://www.microrna.org/microrna/getMrna.do?gene=197187&matureName=hsa-miR-10b*&organism=9606
hsa-miR-10b-3p	MIMAT0004556	hsa-miR-10b*	10236	HNRNPR	-0.16	http://www.microrna.org/microrna/getMrna.do?gene=10236&matureName=hsa-miR-10b*&organism=9606
hsa-miR-10b-3p	MIMAT0004556	hsa-miR-10b*	64121	RRAGC	-0.14	http://www.microrna.org/microrna/getMrna.do?gene=64121&matureName=hsa-miR-10b*&organism=9606
hsa-miR-10b-3p	MIMAT0004556	hsa-miR-10b*	5781	PTPN11	-0.68	http://www.microrna.org/microrna/getMrna.do?gene=5781&matureName=hsa-miR-10b*&organism=9606
hsa-miR-10b-3p	MIMAT0004556	hsa-miR-10b*	27173	SLC39A1	-0.19	http://www.microrna.org/microrna/getMrna.do?gene=27173&matureName=hsa-miR-10b*&organism=9606
hsa-miR-10b-3p	MIMAT0004556	hsa-miR-10b*	284861	LOC284861	-0.23	http://www.microrna.org/microrna/getMrna.do?gene=284861&matureName=hsa-miR-10b*&organism=9606
hsa-miR-10b-3p	MIMAT0004556	hsa-miR-10b*	24138	IFIT5	-0.16	http://www.microrna.org/microrna/getMrna.do?gene=24138&matureName=hsa-miR-10b*&organism=9606
hsa-miR-10b-3p	MIMAT0004556	hsa-miR-10b*	8602	NOP14	-0.8	http://www.microrna.org/microrna/getMrna.do?gene=8602&matureName=hsa-miR-10b*&organism=9606
hsa-miR-10b-3p	MIMAT0004556	hsa-miR-10b*	989	SEPT7	-0.18	http://www.microrna.org/microrna/getMrna.do?gene=989&matureName=hsa-miR-10b*&organism=9606
hsa-miR-10b-3p	MIMAT0004556	hsa-miR-10b*	989	SEPT7	-0.44	http://www.microrna.org/microrna/getMrna.do?gene=989&matureName=hsa-miR-10b*&organism=9606
hsa-miR-10b-3p	MIMAT0004556	hsa-miR-10b*	4355	MPP2	-0.16	http://www.microrna.org/microrna/getMrna.do?gene=4355&matureName=hsa-miR-10b*&organism=9606
hsa-miR-10b-3p	MIMAT0004556	hsa-miR-10b*	22900	CARD8	-0.23	http://www.microrna.org/microrna/getMrna.do?gene=22900&matureName=hsa-miR-10b*&organism=9606
hsa-miR-10b-3p	MIMAT0004556	hsa-miR-10b*	1267	CNP	-0.27	http://www.microrna.org/microrna/getMrna.do?gene=1267&matureName=hsa-miR-10b*&organism=9606
hsa-miR-10b-3p	MIMAT0004556	hsa-miR-10b*	3595	IL12RB2	-0.29	http://www.microrna.org/microrna/getMrna.do?gene=3595&matureName=hsa-miR-10b*&organism=9606
hsa-miR-10b-3p	MIMAT0004556	hsa-miR-10b*	79090	TRAPPC6A	-0.42	http://www.microrna.org/microrna/getMrna.do?gene=79090&matureName=hsa-miR-10b*&organism=9606
hsa-miR-10b-3p	MIMAT0004556	hsa-miR-10b*	22849	CPEB3	-0.13	http://www.microrna.org/microrna/getMrna.do?gene=22849&matureName=hsa-miR-10b*&organism=9606
hsa-miR-10b-3p	MIMAT0004556	hsa-miR-10b*	340371	NRBP2	-0.17	http://www.microrna.org/microrna/getMrna.do?gene=340371&matureName=hsa-miR-10b*&organism=9606
hsa-miR-10b-3p	MIMAT0004556	hsa-miR-10b*	84542	KIAA1841	-0.31	http://www.microrna.org/microrna/getMrna.do?gene=84542&matureName=hsa-miR-10b*&organism=9606
hsa-miR-10b-3p	MIMAT0004556	hsa-miR-10b*	5906	RAP1A	-0.19	http://www.microrna.org/microrna/getMrna.do?gene=5906&matureName=hsa-miR-10b*&organism=9606
hsa-miR-10b-3p	MIMAT0004556	hsa-miR-10b*	2119	ETV5	-0.67	http://www.microrna.org/microrna/getMrna.do?gene=2119&matureName=hsa-miR-10b*&organism=9606
hsa-miR-10b-3p	MIMAT0004556	hsa-miR-10b*	91966	CXorf40A	-0.13	http://www.microrna.org/microrna/getMrna.do?gene=91966&matureName=hsa-miR-10b*&organism=9606
hsa-miR-10b-3p	MIMAT0004556	hsa-miR-10b*	90799	CCDC45	-0.91	http://www.microrna.org/microrna/getMrna.do?gene=90799&matureName=hsa-miR-10b*&organism=9606
hsa-miR-10b-3p	MIMAT0004556	hsa-miR-10b*	9530	BAG4	-0.12	http://www.microrna.org/microrna/getMrna.do?gene=9530&matureName=hsa-miR-10b*&organism=9606
hsa-miR-10b-3p	MIMAT0004556	hsa-miR-10b*	6015	RING1	-0.98	http://www.microrna.org/microrna/getMrna.do?gene=6015&matureName=hsa-miR-10b*&organism=9606
hsa-miR-10b-3p	MIMAT0004556	hsa-miR-10b*	2066	ERBB4	-0.23	http://www.microrna.org/microrna/getMrna.do?gene=2066&matureName=hsa-miR-10b*&organism=9606
hsa-miR-10b-3p	MIMAT0004556	hsa-miR-10b*	4753	NELL2	-0.1	http://www.microrna.org/microrna/getMrna.do?gene=4753&matureName=hsa-miR-10b*&organism=9606
hsa-miR-10b-3p	MIMAT0004556	hsa-miR-10b*	4753	NELL2	-0.24	http://www.microrna.org/microrna/getMrna.do?gene=4753&matureName=hsa-miR-10b*&organism=9606
hsa-miR-10b-3p	MIMAT0004556	hsa-miR-10b*	113201	CASC4	-0.65	http://www.microrna.org/microrna/getMrna.do?gene=113201&matureName=hsa-miR-10b*&organism=9606
hsa-miR-10b-3p	MIMAT0004556	hsa-miR-10b*	113201	CASC4	-0.1	http://www.microrna.org/microrna/getMrna.do?gene=113201&matureName=hsa-miR-10b*&organism=9606
hsa-miR-10b-3p	MIMAT0004556	hsa-miR-10b*	51107	APH1A	-0.15	http://www.microrna.org/microrna/getMrna.do?gene=51107&matureName=hsa-miR-10b*&organism=9606
hsa-miR-10b-3p	MIMAT0004556	hsa-miR-10b*	340371	NRBP2	-0.11	http://www.microrna.org/microrna/getMrna.do?gene=340371&matureName=hsa-miR-10b*&organism=9606
hsa-miR-10b-3p	MIMAT0004556	hsa-miR-10b*	340371	NRBP2	-0.19	http://www.microrna.org/microrna/getMrna.do?gene=340371&matureName=hsa-miR-10b*&organism=9606
hsa-miR-10b-3p	MIMAT0004556	hsa-miR-10b*	644019	CBWD6	-0.8	http://www.microrna.org/microrna/getMrna.do?gene=644019&matureName=hsa-miR-10b*&organism=9606
hsa-miR-10b-3p	MIMAT0004556	hsa-miR-10b*	169166	SNX31	-0.71	http://www.microrna.org/microrna/getMrna.do?gene=169166&matureName=hsa-miR-10b*&organism=9606
hsa-miR-10b-3p	MIMAT0004556	hsa-miR-10b*	51715	RAB23	-1.22	http://www.microrna.org/microrna/getMrna.do?gene=51715&matureName=hsa-miR-10b*&organism=9606
hsa-miR-10b-3p	MIMAT0004556	hsa-miR-10b*	3106	HLA-B	-1.3	http://www.microrna.org/microrna/getMrna.do?gene=3106&matureName=hsa-miR-10b*&organism=9606
hsa-miR-10b-3p	MIMAT0004556	hsa-miR-10b*	104	ADARB1	-0.52	http://www.microrna.org/microrna/getMrna.do?gene=104&matureName=hsa-miR-10b*&organism=9606
hsa-miR-10b-3p	MIMAT0004556	hsa-miR-10b*	5311	PKD2	-0.91	http://www.microrna.org/microrna/getMrna.do?gene=5311&matureName=hsa-miR-10b*&organism=9606
hsa-miR-10b-3p	MIMAT0004556	hsa-miR-10b*	9798	KIAA0174	-0.12	http://www.microrna.org/microrna/getMrna.do?gene=9798&matureName=hsa-miR-10b*&organism=9606
hsa-miR-10b-3p	MIMAT0004556	hsa-miR-10b*	9918	NCAPD2	-0.37	http://www.microrna.org/microrna/getMrna.do?gene=9918&matureName=hsa-miR-10b*&organism=9606
hsa-miR-10b-3p	MIMAT0004556	hsa-miR-10b*	23590	PDSS1	-1.07	http://www.microrna.org/microrna/getMrna.do?gene=23590&matureName=hsa-miR-10b*&organism=9606
hsa-miR-10b-3p	MIMAT0004556	hsa-miR-10b*	29978	UBQLN2	-1.21	http://www.microrna.org/microrna/getMrna.do?gene=29978&matureName=hsa-miR-10b*&organism=9606
hsa-miR-10b-3p	MIMAT0004556	hsa-miR-10b*	29978	UBQLN2	-0.22	http://www.microrna.org/microrna/getMrna.do?gene=29978&matureName=hsa-miR-10b*&organism=9606
hsa-miR-10b-3p	MIMAT0004556	hsa-miR-10b*	29978	UBQLN2	-0.1	http://www.microrna.org/microrna/getMrna.do?gene=29978&matureName=hsa-miR-10b*&organism=9606
hsa-miR-10b-3p	MIMAT0004556	hsa-miR-10b*	8774	NAPG	-0.35	http://www.microrna.org/microrna/getMrna.do?gene=8774&matureName=hsa-miR-10b*&organism=9606
hsa-miR-10b-3p	MIMAT0004556	hsa-miR-10b*	692214	SNORD111	-1.15	http://www.microrna.org/microrna/getMrna.do?gene=692214&matureName=hsa-miR-10b*&organism=9606
hsa-miR-10b-3p	MIMAT0004556	hsa-miR-10b*	728323	LOC728323	-1.12	http://www.microrna.org/microrna/getMrna.do?gene=728323&matureName=hsa-miR-10b*&organism=9606
hsa-miR-10b-3p	MIMAT0004556	hsa-miR-10b*	55142	HAUS2	-0.72	http://www.microrna.org/microrna/getMrna.do?gene=55142&matureName=hsa-miR-10b*&organism=9606
hsa-miR-10b-3p	MIMAT0004556	hsa-miR-10b*	84295	PHF6	-0.5	http://www.microrna.org/microrna/getMrna.do?gene=84295&matureName=hsa-miR-10b*&organism=9606
hsa-miR-10b-3p	MIMAT0004556	hsa-miR-10b*	387338	NSUN4	-0.15	http://www.microrna.org/microrna/getMrna.do?gene=387338&matureName=hsa-miR-10b*&organism=9606
hsa-miR-10b-3p	MIMAT0004556	hsa-miR-10b*	23200	ATP11B	-0.67	http://www.microrna.org/microrna/getMrna.do?gene=23200&matureName=hsa-miR-10b*&organism=9606
hsa-miR-10b-3p	MIMAT0004556	hsa-miR-10b*	23200	ATP11B	-0.18	http://www.microrna.org/microrna/getMrna.do?gene=23200&matureName=hsa-miR-10b*&organism=9606
hsa-miR-10b-3p	MIMAT0004556	hsa-miR-10b*	55143	CDCA8	-0.17	http://www.microrna.org/microrna/getMrna.do?gene=55143&matureName=hsa-miR-10b*&organism=9606
hsa-miR-10b-3p	MIMAT0004556	hsa-miR-10b*	10580	SORBS1	-0.16	http://www.microrna.org/microrna/getMrna.do?gene=10580&matureName=hsa-miR-10b*&organism=9606
hsa-miR-10b-3p	MIMAT0004556	hsa-miR-10b*	160851	DGKH	-0.76	http://www.microrna.org/microrna/getMrna.do?gene=160851&matureName=hsa-miR-10b*&organism=9606
hsa-miR-10b-3p	MIMAT0004556	hsa-miR-10b*	79175	ZNF343	-0.17	http://www.microrna.org/microrna/getMrna.do?gene=79175&matureName=hsa-miR-10b*&organism=9606
hsa-miR-10b-3p	MIMAT0004556	hsa-miR-10b*	344787	ZNF860	-0.1	http://www.microrna.org/microrna/getMrna.do?gene=344787&matureName=hsa-miR-10b*&organism=9606
hsa-miR-10b-3p	MIMAT0004556	hsa-miR-10b*	7504	XK	-0.46	http://www.microrna.org/microrna/getMrna.do?gene=7504&matureName=hsa-miR-10b*&organism=9606
hsa-miR-10b-3p	MIMAT0004556	hsa-miR-10b*	7504	XK	-0.55	http://www.microrna.org/microrna/getMrna.do?gene=7504&matureName=hsa-miR-10b*&organism=9606
hsa-miR-10b-3p	MIMAT0004556	hsa-miR-10b*	375287	RBM43	-0.33	http://www.microrna.org/microrna/getMrna.do?gene=375287&matureName=hsa-miR-10b*&organism=9606
hsa-miR-10b-3p	MIMAT0004556	hsa-miR-10b*	91860	CALML4	-0.47	http://www.microrna.org/microrna/getMrna.do?gene=91860&matureName=hsa-miR-10b*&organism=9606
hsa-miR-10b-3p	MIMAT0004556	hsa-miR-10b*	4026	LPP	-0.19	http://www.microrna.org/microrna/getMrna.do?gene=4026&matureName=hsa-miR-10b*&organism=9606
hsa-miR-10b-3p	MIMAT0004556	hsa-miR-10b*	51514	DTL	-0.19	http://www.microrna.org/microrna/getMrna.do?gene=51514&matureName=hsa-miR-10b*&organism=9606
hsa-miR-10b-3p	MIMAT0004556	hsa-miR-10b*	6294	SAFB	-0.2	http://www.microrna.org/microrna/getMrna.do?gene=6294&matureName=hsa-miR-10b*&organism=9606
hsa-miR-10b-3p	MIMAT0004556	hsa-miR-10b*	79804	NBLA00301	-0.11	http://www.microrna.org/microrna/getMrna.do?gene=79804&matureName=hsa-miR-10b*&organism=9606
hsa-miR-10b-3p	MIMAT0004556	hsa-miR-10b*	79804	NBLA00301	-0.18	http://www.microrna.org/microrna/getMrna.do?gene=79804&matureName=hsa-miR-10b*&organism=9606
hsa-miR-10b-3p	MIMAT0004556	hsa-miR-10b*	54878	DPP8	-0.18	http://www.microrna.org/microrna/getMrna.do?gene=54878&matureName=hsa-miR-10b*&organism=9606
hsa-miR-10b-3p	MIMAT0004556	hsa-miR-10b*	7270	TTF1	-0.11	http://www.microrna.org/microrna/getMrna.do?gene=7270&matureName=hsa-miR-10b*&organism=9606
hsa-miR-10b-3p	MIMAT0004556	hsa-miR-10b*	54149	C21orf91	-0.2	http://www.microrna.org/microrna/getMrna.do?gene=54149&matureName=hsa-miR-10b*&organism=9606
hsa-miR-10b-3p	MIMAT0004556	hsa-miR-10b*	54149	C21orf91	-0.47	http://www.microrna.org/microrna/getMrna.do?gene=54149&matureName=hsa-miR-10b*&organism=9606
hsa-miR-10b-3p	MIMAT0004556	hsa-miR-10b*	54149	C21orf91	-0.21	http://www.microrna.org/microrna/getMrna.do?gene=54149&matureName=hsa-miR-10b*&organism=9606
hsa-miR-10b-3p	MIMAT0004556	hsa-miR-10b*	347746	PAR-SN	-0.47	http://www.microrna.org/microrna/getMrna.do?gene=347746&matureName=hsa-miR-10b*&organism=9606
hsa-miR-10b-3p	MIMAT0004556	hsa-miR-10b*	9139	CBFA2T2	-0.15	http://www.microrna.org/microrna/getMrna.do?gene=9139&matureName=hsa-miR-10b*&organism=9606
hsa-miR-10b-3p	MIMAT0004556	hsa-miR-10b*	3726	JUNB	-0.21	http://www.microrna.org/microrna/getMrna.do?gene=3726&matureName=hsa-miR-10b*&organism=9606
hsa-miR-10b-3p	MIMAT0004556	hsa-miR-10b*	83605	CCM2	-0.15	http://www.microrna.org/microrna/getMrna.do?gene=83605&matureName=hsa-miR-10b*&organism=9606
hsa-miR-10b-3p	MIMAT0004556	hsa-miR-10b*	163702	IL28RA	-0.2	http://www.microrna.org/microrna/getMrna.do?gene=163702&matureName=hsa-miR-10b*&organism=9606
hsa-miR-10b-3p	MIMAT0004556	hsa-miR-10b*	4190	MDH1	-0.29	http://www.microrna.org/microrna/getMrna.do?gene=4190&matureName=hsa-miR-10b*&organism=9606
hsa-miR-10b-3p	MIMAT0004556	hsa-miR-10b*	4150	MAZ	-0.21	http://www.microrna.org/microrna/getMrna.do?gene=4150&matureName=hsa-miR-10b*&organism=9606
hsa-miR-10b-3p	MIMAT0004556	hsa-miR-10b*	79987	SVEP1	-0.33	http://www.microrna.org/microrna/getMrna.do?gene=79987&matureName=hsa-miR-10b*&organism=9606
hsa-miR-10b-3p	MIMAT0004556	hsa-miR-10b*	54856	GON4L	-0.74	http://www.microrna.org/microrna/getMrna.do?gene=54856&matureName=hsa-miR-10b*&organism=9606
hsa-miR-10b-3p	MIMAT0004556	hsa-miR-10b*	10781	ZNF266	-0.5	http://www.microrna.org/microrna/getMrna.do?gene=10781&matureName=hsa-miR-10b*&organism=9606
hsa-miR-10b-3p	MIMAT0004556	hsa-miR-10b*	56658	TRIM39	-0.54	http://www.microrna.org/microrna/getMrna.do?gene=56658&matureName=hsa-miR-10b*&organism=9606
hsa-miR-10b-3p	MIMAT0004556	hsa-miR-10b*	158358	KIAA2026	-0.96	http://www.microrna.org/microrna/getMrna.do?gene=158358&matureName=hsa-miR-10b*&organism=9606
hsa-miR-10b-3p	MIMAT0004556	hsa-miR-10b*	637	BID	-0.4	http://www.microrna.org/microrna/getMrna.do?gene=637&matureName=hsa-miR-10b*&organism=9606
hsa-miR-10b-3p	MIMAT0004556	hsa-miR-10b*	80254	CEP63	-0.29	http://www.microrna.org/microrna/getMrna.do?gene=80254&matureName=hsa-miR-10b*&organism=9606
hsa-miR-10b-3p	MIMAT0004556	hsa-miR-10b*	80254	CEP63	-0.14	http://www.microrna.org/microrna/getMrna.do?gene=80254&matureName=hsa-miR-10b*&organism=9606
hsa-miR-10b-3p	MIMAT0004556	hsa-miR-10b*	9871	SEC24D	-0.21	http://www.microrna.org/microrna/getMrna.do?gene=9871&matureName=hsa-miR-10b*&organism=9606
hsa-miR-10b-3p	MIMAT0004556	hsa-miR-10b*	23043	TNIK	-1.1	http://www.microrna.org/microrna/getMrna.do?gene=23043&matureName=hsa-miR-10b*&organism=9606
hsa-miR-10b-3p	MIMAT0004556	hsa-miR-10b*	54665	RSBN1	-0.89	http://www.microrna.org/microrna/getMrna.do?gene=54665&matureName=hsa-miR-10b*&organism=9606
hsa-miR-10b-3p	MIMAT0004556	hsa-miR-10b*	253943	YTHDF3	-0.16	http://www.microrna.org/microrna/getMrna.do?gene=253943&matureName=hsa-miR-10b*&organism=9606
hsa-miR-10b-3p	MIMAT0004556	hsa-miR-10b*	253943	YTHDF3	-0.27	http://www.microrna.org/microrna/getMrna.do?gene=253943&matureName=hsa-miR-10b*&organism=9606
hsa-miR-10b-3p	MIMAT0004556	hsa-miR-10b*	257415	FAM133B	-0.94	http://www.microrna.org/microrna/getMrna.do?gene=257415&matureName=hsa-miR-10b*&organism=9606
hsa-miR-10b-3p	MIMAT0004556	hsa-miR-10b*	257415	FAM133B	-0.16	http://www.microrna.org/microrna/getMrna.do?gene=257415&matureName=hsa-miR-10b*&organism=9606
hsa-miR-10b-3p	MIMAT0004556	hsa-miR-10b*	2074	ERCC6	-0.1	http://www.microrna.org/microrna/getMrna.do?gene=2074&matureName=hsa-miR-10b*&organism=9606
hsa-miR-10b-3p	MIMAT0004556	hsa-miR-10b*	644919	LOC644919	-0.4	http://www.microrna.org/microrna/getMrna.do?gene=644919&matureName=hsa-miR-10b*&organism=9606
hsa-miR-10b-3p	MIMAT0004556	hsa-miR-10b*	644919	LOC644919	-0.3	http://www.microrna.org/microrna/getMrna.do?gene=644919&matureName=hsa-miR-10b*&organism=9606
hsa-miR-10b-3p	MIMAT0004556	hsa-miR-10b*	4869	NPM1	-1.02	http://www.microrna.org/microrna/getMrna.do?gene=4869&matureName=hsa-miR-10b*&organism=9606
hsa-miR-10b-3p	MIMAT0004556	hsa-miR-10b*	55833	UBAP2	-0.1	http://www.microrna.org/microrna/getMrna.do?gene=55833&matureName=hsa-miR-10b*&organism=9606
hsa-miR-10b-3p	MIMAT0004556	hsa-miR-10b*	22900	CARD8	-0.28	http://www.microrna.org/microrna/getMrna.do?gene=22900&matureName=hsa-miR-10b*&organism=9606
hsa-miR-10b-3p	MIMAT0004556	hsa-miR-10b*	401145	FAM190A	-0.24	http://www.microrna.org/microrna/getMrna.do?gene=401145&matureName=hsa-miR-10b*&organism=9606
hsa-miR-10b-3p	MIMAT0004556	hsa-miR-10b*	10178	ODZ1	-0.14	http://www.microrna.org/microrna/getMrna.do?gene=10178&matureName=hsa-miR-10b*&organism=9606
hsa-miR-10b-3p	MIMAT0004556	hsa-miR-10b*	10178	ODZ1	-0.39	http://www.microrna.org/microrna/getMrna.do?gene=10178&matureName=hsa-miR-10b*&organism=9606
hsa-miR-10b-3p	MIMAT0004556	hsa-miR-10b*	79895	ATP8B4	-0.11	http://www.microrna.org/microrna/getMrna.do?gene=79895&matureName=hsa-miR-10b*&organism=9606
hsa-miR-10b-3p	MIMAT0004556	hsa-miR-10b*	4956	ODF1	-0.14	http://www.microrna.org/microrna/getMrna.do?gene=4956&matureName=hsa-miR-10b*&organism=9606
hsa-miR-10b-3p	MIMAT0004556	hsa-miR-10b*	10576	CCT2	-0.75	http://www.microrna.org/microrna/getMrna.do?gene=10576&matureName=hsa-miR-10b*&organism=9606
hsa-miR-10b-3p	MIMAT0004556	hsa-miR-10b*	26018	LRIG1	-0.17	http://www.microrna.org/microrna/getMrna.do?gene=26018&matureName=hsa-miR-10b*&organism=9606
hsa-miR-10b-3p	MIMAT0004556	hsa-miR-10b*	1967	EIF2B1	-0.28	http://www.microrna.org/microrna/getMrna.do?gene=1967&matureName=hsa-miR-10b*&organism=9606
hsa-miR-10b-3p	MIMAT0004556	hsa-miR-10b*	57554	LRRC7	-0.29	http://www.microrna.org/microrna/getMrna.do?gene=57554&matureName=hsa-miR-10b*&organism=9606
hsa-miR-10b-3p	MIMAT0004556	hsa-miR-10b*	6097	RORC	-0.76	http://www.microrna.org/microrna/getMrna.do?gene=6097&matureName=hsa-miR-10b*&organism=9606
hsa-miR-10b-3p	MIMAT0004556	hsa-miR-10b*	25833	POU2F3	-1.15	http://www.microrna.org/microrna/getMrna.do?gene=25833&matureName=hsa-miR-10b*&organism=9606
hsa-miR-10b-3p	MIMAT0004556	hsa-miR-10b*	4602	MYB	-0.41	http://www.microrna.org/microrna/getMrna.do?gene=4602&matureName=hsa-miR-10b*&organism=9606
hsa-miR-10b-3p	MIMAT0004556	hsa-miR-10b*	7133	TNFRSF1B	-0.38	http://www.microrna.org/microrna/getMrna.do?gene=7133&matureName=hsa-miR-10b*&organism=9606
hsa-miR-10b-3p	MIMAT0004556	hsa-miR-10b*	805	CALM2	-0.17	http://www.microrna.org/microrna/getMrna.do?gene=805&matureName=hsa-miR-10b*&organism=9606
hsa-miR-10b-3p	MIMAT0004556	hsa-miR-10b*	9557	CHD1L	-0.94	http://www.microrna.org/microrna/getMrna.do?gene=9557&matureName=hsa-miR-10b*&organism=9606
hsa-miR-10b-3p	MIMAT0004556	hsa-miR-10b*	25800	SLC39A6	-1.13	http://www.microrna.org/microrna/getMrna.do?gene=25800&matureName=hsa-miR-10b*&organism=9606
hsa-miR-10b-3p	MIMAT0004556	hsa-miR-10b*	25800	SLC39A6	-0.12	http://www.microrna.org/microrna/getMrna.do?gene=25800&matureName=hsa-miR-10b*&organism=9606
hsa-miR-10b-3p	MIMAT0004556	hsa-miR-10b*	128989	C22orf25	-0.33	http://www.microrna.org/microrna/getMrna.do?gene=128989&matureName=hsa-miR-10b*&organism=9606
hsa-miR-10b-3p	MIMAT0004556	hsa-miR-10b*	92912	UBE2Q2	-0.11	http://www.microrna.org/microrna/getMrna.do?gene=92912&matureName=hsa-miR-10b*&organism=9606
hsa-miR-10b-3p	MIMAT0004556	hsa-miR-10b*	64168	NECAB1	-0.58	http://www.microrna.org/microrna/getMrna.do?gene=64168&matureName=hsa-miR-10b*&organism=9606
hsa-miR-10b-3p	MIMAT0004556	hsa-miR-10b*	64168	NECAB1	-0.11	http://www.microrna.org/microrna/getMrna.do?gene=64168&matureName=hsa-miR-10b*&organism=9606
hsa-miR-10b-3p	MIMAT0004556	hsa-miR-10b*	51111	SUV420H1	-0.82	http://www.microrna.org/microrna/getMrna.do?gene=51111&matureName=hsa-miR-10b*&organism=9606
hsa-miR-10b-3p	MIMAT0004556	hsa-miR-10b*	2882	GPX7	-0.1	http://www.microrna.org/microrna/getMrna.do?gene=2882&matureName=hsa-miR-10b*&organism=9606
hsa-miR-10b-3p	MIMAT0004556	hsa-miR-10b*	5066	PAM	-1.32	http://www.microrna.org/microrna/getMrna.do?gene=5066&matureName=hsa-miR-10b*&organism=9606
hsa-miR-10b-3p	MIMAT0004556	hsa-miR-10b*	10086	HHLA1	-0.34	http://www.microrna.org/microrna/getMrna.do?gene=10086&matureName=hsa-miR-10b*&organism=9606
hsa-miR-10b-3p	MIMAT0004556	hsa-miR-10b*	5995	RGR	-0.25	http://www.microrna.org/microrna/getMrna.do?gene=5995&matureName=hsa-miR-10b*&organism=9606
hsa-miR-10b-3p	MIMAT0004556	hsa-miR-10b*	83989	FAM172A	-0.52	http://www.microrna.org/microrna/getMrna.do?gene=83989&matureName=hsa-miR-10b*&organism=9606
hsa-miR-10b-3p	MIMAT0004556	hsa-miR-10b*	205	AK3L1	-0.12	http://www.microrna.org/microrna/getMrna.do?gene=205&matureName=hsa-miR-10b*&organism=9606
hsa-miR-10b-3p	MIMAT0004556	hsa-miR-10b*	9360	PPIG	-0.25	http://www.microrna.org/microrna/getMrna.do?gene=9360&matureName=hsa-miR-10b*&organism=9606
hsa-miR-10b-3p	MIMAT0004556	hsa-miR-10b*	9360	PPIG	-0.24	http://www.microrna.org/microrna/getMrna.do?gene=9360&matureName=hsa-miR-10b*&organism=9606
hsa-miR-10b-3p	MIMAT0004556	hsa-miR-10b*	5089	PBX2	-0.12	http://www.microrna.org/microrna/getMrna.do?gene=5089&matureName=hsa-miR-10b*&organism=9606
hsa-miR-10b-3p	MIMAT0004556	hsa-miR-10b*	54993	ZSCAN2	-0.24	http://www.microrna.org/microrna/getMrna.do?gene=54993&matureName=hsa-miR-10b*&organism=9606
hsa-miR-10b-3p	MIMAT0004556	hsa-miR-10b*	7158	TP53BP1	-0.21	http://www.microrna.org/microrna/getMrna.do?gene=7158&matureName=hsa-miR-10b*&organism=9606
hsa-miR-10b-3p	MIMAT0004556	hsa-miR-10b*	23582	CCNDBP1	-0.2	http://www.microrna.org/microrna/getMrna.do?gene=23582&matureName=hsa-miR-10b*&organism=9606
hsa-miR-10b-3p	MIMAT0004556	hsa-miR-10b*	57697	FANCM	-1.02	http://www.microrna.org/microrna/getMrna.do?gene=57697&matureName=hsa-miR-10b*&organism=9606
hsa-miR-10b-3p	MIMAT0004556	hsa-miR-10b*	57697	FANCM	-0.16	http://www.microrna.org/microrna/getMrna.do?gene=57697&matureName=hsa-miR-10b*&organism=9606
hsa-miR-10b-3p	MIMAT0004556	hsa-miR-10b*	6487	ST3GAL3	-0.51	http://www.microrna.org/microrna/getMrna.do?gene=6487&matureName=hsa-miR-10b*&organism=9606
hsa-miR-10b-3p	MIMAT0004556	hsa-miR-10b*	23022	PALLD	-0.44	http://www.microrna.org/microrna/getMrna.do?gene=23022&matureName=hsa-miR-10b*&organism=9606
hsa-miR-10b-3p	MIMAT0004556	hsa-miR-10b*	168850	ZNF800	-0.15	http://www.microrna.org/microrna/getMrna.do?gene=168850&matureName=hsa-miR-10b*&organism=9606
hsa-miR-10b-3p	MIMAT0004556	hsa-miR-10b*	57381	RHOJ	-1	http://www.microrna.org/microrna/getMrna.do?gene=57381&matureName=hsa-miR-10b*&organism=9606
hsa-miR-10b-3p	MIMAT0004556	hsa-miR-10b*	9326	ZNHIT3	-0.66	http://www.microrna.org/microrna/getMrna.do?gene=9326&matureName=hsa-miR-10b*&organism=9606
hsa-miR-10b-3p	MIMAT0004556	hsa-miR-10b*	1317	SLC31A1	-0.17	http://www.microrna.org/microrna/getMrna.do?gene=1317&matureName=hsa-miR-10b*&organism=9606
hsa-miR-10b-3p	MIMAT0004556	hsa-miR-10b*	1460	CSNK2B	-0.43	http://www.microrna.org/microrna/getMrna.do?gene=1460&matureName=hsa-miR-10b*&organism=9606
hsa-miR-10b-3p	MIMAT0004556	hsa-miR-10b*	22953	P2RX2	-0.28	http://www.microrna.org/microrna/getMrna.do?gene=22953&matureName=hsa-miR-10b*&organism=9606
hsa-miR-10b-3p	MIMAT0004556	hsa-miR-10b*	343450	KCNT2	-0.18	http://www.microrna.org/microrna/getMrna.do?gene=343450&matureName=hsa-miR-10b*&organism=9606
hsa-miR-10b-3p	MIMAT0004556	hsa-miR-10b*	2151	F2RL2	-0.11	http://www.microrna.org/microrna/getMrna.do?gene=2151&matureName=hsa-miR-10b*&organism=9606
hsa-miR-10b-3p	MIMAT0004556	hsa-miR-10b*	824	CAPN2	-0.1	http://www.microrna.org/microrna/getMrna.do?gene=824&matureName=hsa-miR-10b*&organism=9606
hsa-miR-10b-3p	MIMAT0004556	hsa-miR-10b*	132671	SPATA18	-0.28	http://www.microrna.org/microrna/getMrna.do?gene=132671&matureName=hsa-miR-10b*&organism=9606
hsa-miR-10b-3p	MIMAT0004556	hsa-miR-10b*	10288	LILRB2	-1.02	http://www.microrna.org/microrna/getMrna.do?gene=10288&matureName=hsa-miR-10b*&organism=9606
hsa-miR-10b-3p	MIMAT0004556	hsa-miR-10b*	88455	ANKRD13A	-0.39	http://www.microrna.org/microrna/getMrna.do?gene=88455&matureName=hsa-miR-10b*&organism=9606
hsa-miR-10b-3p	MIMAT0004556	hsa-miR-10b*	88455	ANKRD13A	-0.93	http://www.microrna.org/microrna/getMrna.do?gene=88455&matureName=hsa-miR-10b*&organism=9606
hsa-miR-10b-3p	MIMAT0004556	hsa-miR-10b*	56990	CDC42SE2	-0.26	http://www.microrna.org/microrna/getMrna.do?gene=56990&matureName=hsa-miR-10b*&organism=9606
hsa-miR-10b-3p	MIMAT0004556	hsa-miR-10b*	9584	RBM39	-0.1	http://www.microrna.org/microrna/getMrna.do?gene=9584&matureName=hsa-miR-10b*&organism=9606
hsa-miR-10b-3p	MIMAT0004556	hsa-miR-10b*	204851	HIPK1	-0.29	http://www.microrna.org/microrna/getMrna.do?gene=204851&matureName=hsa-miR-10b*&organism=9606
hsa-miR-10b-3p	MIMAT0004556	hsa-miR-10b*	10285	SMNDC1	-0.15	http://www.microrna.org/microrna/getMrna.do?gene=10285&matureName=hsa-miR-10b*&organism=9606
hsa-miR-10b-3p	MIMAT0004556	hsa-miR-10b*	730101	LOC730101	-0.17	http://www.microrna.org/microrna/getMrna.do?gene=730101&matureName=hsa-miR-10b*&organism=9606
hsa-miR-10b-3p	MIMAT0004556	hsa-miR-10b*	730101	LOC730101	-0.63	http://www.microrna.org/microrna/getMrna.do?gene=730101&matureName=hsa-miR-10b*&organism=9606
hsa-miR-10b-3p	MIMAT0004556	hsa-miR-10b*	730101	LOC730101	-0.17	http://www.microrna.org/microrna/getMrna.do?gene=730101&matureName=hsa-miR-10b*&organism=9606
hsa-miR-10b-3p	MIMAT0004556	hsa-miR-10b*	3182	HNRNPAB	-0.11	http://www.microrna.org/microrna/getMrna.do?gene=3182&matureName=hsa-miR-10b*&organism=9606
hsa-miR-10b-3p	MIMAT0004556	hsa-miR-10b*	2996	GYPE	-0.56	http://www.microrna.org/microrna/getMrna.do?gene=2996&matureName=hsa-miR-10b*&organism=9606
hsa-miR-10b-3p	MIMAT0004556	hsa-miR-10b*	4211	MEIS1	-0.52	http://www.microrna.org/microrna/getMrna.do?gene=4211&matureName=hsa-miR-10b*&organism=9606
hsa-miR-10b-3p	MIMAT0004556	hsa-miR-10b*	64766	S100PBP	-0.3	http://www.microrna.org/microrna/getMrna.do?gene=64766&matureName=hsa-miR-10b*&organism=9606
hsa-miR-10b-3p	MIMAT0004556	hsa-miR-10b*	8732	RNGTT	-0.8	http://www.microrna.org/microrna/getMrna.do?gene=8732&matureName=hsa-miR-10b*&organism=9606
hsa-miR-10b-3p	MIMAT0004556	hsa-miR-10b*	8732	RNGTT	-0.28	http://www.microrna.org/microrna/getMrna.do?gene=8732&matureName=hsa-miR-10b*&organism=9606
hsa-miR-10b-3p	MIMAT0004556	hsa-miR-10b*	51501	C11orf73	-0.4	http://www.microrna.org/microrna/getMrna.do?gene=51501&matureName=hsa-miR-10b*&organism=9606
hsa-miR-10b-3p	MIMAT0004556	hsa-miR-10b*	5001	ORC5L	-1.11	http://www.microrna.org/microrna/getMrna.do?gene=5001&matureName=hsa-miR-10b*&organism=9606
hsa-miR-10b-3p	MIMAT0004556	hsa-miR-10b*	5001	ORC5L	-0.18	http://www.microrna.org/microrna/getMrna.do?gene=5001&matureName=hsa-miR-10b*&organism=9606
hsa-miR-10b-3p	MIMAT0004556	hsa-miR-10b*	135644	TRIM40	-0.2	http://www.microrna.org/microrna/getMrna.do?gene=135644&matureName=hsa-miR-10b*&organism=9606
hsa-miR-10b-3p	MIMAT0004556	hsa-miR-10b*	1690	COCH	-1.24	http://www.microrna.org/microrna/getMrna.do?gene=1690&matureName=hsa-miR-10b*&organism=9606
hsa-miR-10b-3p	MIMAT0004556	hsa-miR-10b*	165055	CCDC138	-0.25	http://www.microrna.org/microrna/getMrna.do?gene=165055&matureName=hsa-miR-10b*&organism=9606
hsa-miR-10b-3p	MIMAT0004556	hsa-miR-10b*	55578	FAM48A	-0.2	http://www.microrna.org/microrna/getMrna.do?gene=55578&matureName=hsa-miR-10b*&organism=9606
hsa-miR-10b-3p	MIMAT0004556	hsa-miR-10b*	10149	GPR64	-0.38	http://www.microrna.org/microrna/getMrna.do?gene=10149&matureName=hsa-miR-10b*&organism=9606
hsa-miR-10b-3p	MIMAT0004556	hsa-miR-10b*	9960	USP3	-0.12	http://www.microrna.org/microrna/getMrna.do?gene=9960&matureName=hsa-miR-10b*&organism=9606
hsa-miR-10b-3p	MIMAT0004556	hsa-miR-10b*	3222	HOXC5	-0.43	http://www.microrna.org/microrna/getMrna.do?gene=3222&matureName=hsa-miR-10b*&organism=9606
hsa-miR-10b-3p	MIMAT0004556	hsa-miR-10b*	85480	TSLP	-0.16	http://www.microrna.org/microrna/getMrna.do?gene=85480&matureName=hsa-miR-10b*&organism=9606
hsa-miR-10b-3p	MIMAT0004556	hsa-miR-10b*	10152	ABI2	-0.1	http://www.microrna.org/microrna/getMrna.do?gene=10152&matureName=hsa-miR-10b*&organism=9606
hsa-miR-10b-3p	MIMAT0004556	hsa-miR-10b*	27329	ANGPTL3	-0.16	http://www.microrna.org/microrna/getMrna.do?gene=27329&matureName=hsa-miR-10b*&organism=9606
hsa-miR-10b-3p	MIMAT0004556	hsa-miR-10b*	51172	NAGPA	-0.11	http://www.microrna.org/microrna/getMrna.do?gene=51172&matureName=hsa-miR-10b*&organism=9606
hsa-miR-10b-3p	MIMAT0004556	hsa-miR-10b*	90362	FAM110B	-0.25	http://www.microrna.org/microrna/getMrna.do?gene=90362&matureName=hsa-miR-10b*&organism=9606
hsa-miR-10b-3p	MIMAT0004556	hsa-miR-10b*	83875	BCO2	-0.11	http://www.microrna.org/microrna/getMrna.do?gene=83875&matureName=hsa-miR-10b*&organism=9606
hsa-miR-10b-3p	MIMAT0004556	hsa-miR-10b*	3373	HYAL1	-0.17	http://www.microrna.org/microrna/getMrna.do?gene=3373&matureName=hsa-miR-10b*&organism=9606
hsa-miR-10b-3p	MIMAT0004556	hsa-miR-10b*	84059	GPR98	-0.26	http://www.microrna.org/microrna/getMrna.do?gene=84059&matureName=hsa-miR-10b*&organism=9606
hsa-miR-10b-3p	MIMAT0004556	hsa-miR-10b*	51564	HDAC7	-0.32	http://www.microrna.org/microrna/getMrna.do?gene=51564&matureName=hsa-miR-10b*&organism=9606
hsa-miR-10b-3p	MIMAT0004556	hsa-miR-10b*	1240	CMKLR1	-0.1	http://www.microrna.org/microrna/getMrna.do?gene=1240&matureName=hsa-miR-10b*&organism=9606
hsa-miR-10b-3p	MIMAT0004556	hsa-miR-10b*	51611	DPH5	-0.98	http://www.microrna.org/microrna/getMrna.do?gene=51611&matureName=hsa-miR-10b*&organism=9606
hsa-miR-10b-3p	MIMAT0004556	hsa-miR-10b*	51611	DPH5	-0.16	http://www.microrna.org/microrna/getMrna.do?gene=51611&matureName=hsa-miR-10b*&organism=9606
hsa-miR-10b-3p	MIMAT0004556	hsa-miR-10b*	59	ACTA2	-0.59	http://www.microrna.org/microrna/getMrna.do?gene=59&matureName=hsa-miR-10b*&organism=9606
hsa-miR-10b-3p	MIMAT0004556	hsa-miR-10b*	1454	CSNK1E	-0.26	http://www.microrna.org/microrna/getMrna.do?gene=1454&matureName=hsa-miR-10b*&organism=9606
hsa-miR-10b-3p	MIMAT0004556	hsa-miR-10b*	9980	DOPEY2	-1.32	http://www.microrna.org/microrna/getMrna.do?gene=9980&matureName=hsa-miR-10b*&organism=9606
hsa-miR-10b-3p	MIMAT0004556	hsa-miR-10b*	5276	SERPINI2	-0.84	http://www.microrna.org/microrna/getMrna.do?gene=5276&matureName=hsa-miR-10b*&organism=9606
hsa-miR-10b-3p	MIMAT0004556	hsa-miR-10b*	114898	C1QTNF2	-0.46	http://www.microrna.org/microrna/getMrna.do?gene=114898&matureName=hsa-miR-10b*&organism=9606
hsa-miR-10b-3p	MIMAT0004556	hsa-miR-10b*	55785	FGD6	-0.76	http://www.microrna.org/microrna/getMrna.do?gene=55785&matureName=hsa-miR-10b*&organism=9606
hsa-miR-10b-3p	MIMAT0004556	hsa-miR-10b*	771	CA12	-0.14	http://www.microrna.org/microrna/getMrna.do?gene=771&matureName=hsa-miR-10b*&organism=9606
hsa-miR-10b-3p	MIMAT0004556	hsa-miR-10b*	7802	DNALI1	-0.24	http://www.microrna.org/microrna/getMrna.do?gene=7802&matureName=hsa-miR-10b*&organism=9606
hsa-miR-10b-3p	MIMAT0004556	hsa-miR-10b*	286410	ATP11C	-0.18	http://www.microrna.org/microrna/getMrna.do?gene=286410&matureName=hsa-miR-10b*&organism=9606
hsa-miR-10b-3p	MIMAT0004556	hsa-miR-10b*	166	AES	-0.12	http://www.microrna.org/microrna/getMrna.do?gene=166&matureName=hsa-miR-10b*&organism=9606
hsa-miR-10b-3p	MIMAT0004556	hsa-miR-10b*	22854	NTNG1	-0.16	http://www.microrna.org/microrna/getMrna.do?gene=22854&matureName=hsa-miR-10b*&organism=9606
hsa-miR-10b-3p	MIMAT0004556	hsa-miR-10b*	4520	MTF1	-0.28	http://www.microrna.org/microrna/getMrna.do?gene=4520&matureName=hsa-miR-10b*&organism=9606
hsa-miR-10b-3p	MIMAT0004556	hsa-miR-10b*	108	ADCY2	-0.37	http://www.microrna.org/microrna/getMrna.do?gene=108&matureName=hsa-miR-10b*&organism=9606
hsa-miR-10b-3p	MIMAT0004556	hsa-miR-10b*	108	ADCY2	-0.14	http://www.microrna.org/microrna/getMrna.do?gene=108&matureName=hsa-miR-10b*&organism=9606
hsa-miR-10b-3p	MIMAT0004556	hsa-miR-10b*	81611	ANP32E	-0.15	http://www.microrna.org/microrna/getMrna.do?gene=81611&matureName=hsa-miR-10b*&organism=9606
hsa-miR-10b-3p	MIMAT0004556	hsa-miR-10b*	100128560	LOC100128560	-0.28	http://www.microrna.org/microrna/getMrna.do?gene=100128560&matureName=hsa-miR-10b*&organism=9606
hsa-miR-10b-3p	MIMAT0004556	hsa-miR-10b*	55769	ZNF83	-0.68	http://www.microrna.org/microrna/getMrna.do?gene=55769&matureName=hsa-miR-10b*&organism=9606
hsa-miR-10b-3p	MIMAT0004556	hsa-miR-10b*	11091	WDR5	-0.67	http://www.microrna.org/microrna/getMrna.do?gene=11091&matureName=hsa-miR-10b*&organism=9606
hsa-miR-10b-3p	MIMAT0004556	hsa-miR-10b*	1460	CSNK2B	-0.43	http://www.microrna.org/microrna/getMrna.do?gene=1460&matureName=hsa-miR-10b*&organism=9606
hsa-miR-10b-3p	MIMAT0004556	hsa-miR-10b*	10630	PDPN	-0.35	http://www.microrna.org/microrna/getMrna.do?gene=10630&matureName=hsa-miR-10b*&organism=9606
hsa-miR-10b-3p	MIMAT0004556	hsa-miR-10b*	55610	CCDC132	-0.96	http://www.microrna.org/microrna/getMrna.do?gene=55610&matureName=hsa-miR-10b*&organism=9606
hsa-miR-10b-3p	MIMAT0004556	hsa-miR-10b*	55610	CCDC132	-0.13	http://www.microrna.org/microrna/getMrna.do?gene=55610&matureName=hsa-miR-10b*&organism=9606
hsa-miR-10b-3p	MIMAT0004556	hsa-miR-10b*	433	ASGR2	-0.14	http://www.microrna.org/microrna/getMrna.do?gene=433&matureName=hsa-miR-10b*&organism=9606
hsa-miR-10b-3p	MIMAT0004556	hsa-miR-10b*	64400	AKTIP	-0.12	http://www.microrna.org/microrna/getMrna.do?gene=64400&matureName=hsa-miR-10b*&organism=9606
hsa-miR-10b-3p	MIMAT0004556	hsa-miR-10b*	3109	HLA-DMB	-0.26	http://www.microrna.org/microrna/getMrna.do?gene=3109&matureName=hsa-miR-10b*&organism=9606
hsa-miR-10b-3p	MIMAT0004556	hsa-miR-10b*	780	DDR1	-0.34	http://www.microrna.org/microrna/getMrna.do?gene=780&matureName=hsa-miR-10b*&organism=9606
hsa-miR-10b-3p	MIMAT0004556	hsa-miR-10b*	7170	TPM3	-0.41	http://www.microrna.org/microrna/getMrna.do?gene=7170&matureName=hsa-miR-10b*&organism=9606
hsa-miR-10b-3p	MIMAT0004556	hsa-miR-10b*	121601	ANO4	-1.01	http://www.microrna.org/microrna/getMrna.do?gene=121601&matureName=hsa-miR-10b*&organism=9606
hsa-miR-10b-3p	MIMAT0004556	hsa-miR-10b*	1326	MAP3K8	-0.1	http://www.microrna.org/microrna/getMrna.do?gene=1326&matureName=hsa-miR-10b*&organism=9606
hsa-miR-10b-3p	MIMAT0004556	hsa-miR-10b*	8405	SPOP	-0.17	http://www.microrna.org/microrna/getMrna.do?gene=8405&matureName=hsa-miR-10b*&organism=9606
hsa-miR-10b-3p	MIMAT0004556	hsa-miR-10b*	3557	IL1RN	-0.44	http://www.microrna.org/microrna/getMrna.do?gene=3557&matureName=hsa-miR-10b*&organism=9606
hsa-miR-10b-3p	MIMAT0004556	hsa-miR-10b*	51661	FKBP7	-0.85	http://www.microrna.org/microrna/getMrna.do?gene=51661&matureName=hsa-miR-10b*&organism=9606
hsa-miR-10b-3p	MIMAT0004556	hsa-miR-10b*	54482	CCDC76	-0.46	http://www.microrna.org/microrna/getMrna.do?gene=54482&matureName=hsa-miR-10b*&organism=9606
hsa-miR-10b-3p	MIMAT0004556	hsa-miR-10b*	253725	FAM21C	-0.44	http://www.microrna.org/microrna/getMrna.do?gene=253725&matureName=hsa-miR-10b*&organism=9606
hsa-miR-10b-3p	MIMAT0004556	hsa-miR-10b*	6850	SYK	-0.24	http://www.microrna.org/microrna/getMrna.do?gene=6850&matureName=hsa-miR-10b*&organism=9606
hsa-miR-10b-3p	MIMAT0004556	hsa-miR-10b*	10505	SEMA4F	-0.43	http://www.microrna.org/microrna/getMrna.do?gene=10505&matureName=hsa-miR-10b*&organism=9606
hsa-miR-10b-3p	MIMAT0004556	hsa-miR-10b*	79712	GTDC1	-1.21	http://www.microrna.org/microrna/getMrna.do?gene=79712&matureName=hsa-miR-10b*&organism=9606
hsa-miR-10b-3p	MIMAT0004556	hsa-miR-10b*	4986	OPRK1	-0.13	http://www.microrna.org/microrna/getMrna.do?gene=4986&matureName=hsa-miR-10b*&organism=9606
hsa-miR-10b-3p	MIMAT0004556	hsa-miR-10b*	27319	BHLHE22	-0.23	http://www.microrna.org/microrna/getMrna.do?gene=27319&matureName=hsa-miR-10b*&organism=9606
hsa-miR-10b-3p	MIMAT0004556	hsa-miR-10b*	2926	GRSF1	-0.12	http://www.microrna.org/microrna/getMrna.do?gene=2926&matureName=hsa-miR-10b*&organism=9606
hsa-miR-10b-3p	MIMAT0004556	hsa-miR-10b*	10317	B3GALT5	-0.29	http://www.microrna.org/microrna/getMrna.do?gene=10317&matureName=hsa-miR-10b*&organism=9606
hsa-miR-10b-3p	MIMAT0004556	hsa-miR-10b*	3174	HNF4G	-0.13	http://www.microrna.org/microrna/getMrna.do?gene=3174&matureName=hsa-miR-10b*&organism=9606
hsa-miR-10b-3p	MIMAT0004556	hsa-miR-10b*	1486	CTBS	-0.1	http://www.microrna.org/microrna/getMrna.do?gene=1486&matureName=hsa-miR-10b*&organism=9606
hsa-miR-10b-3p	MIMAT0004556	hsa-miR-10b*	150275	CCDC117	-0.75	http://www.microrna.org/microrna/getMrna.do?gene=150275&matureName=hsa-miR-10b*&organism=9606
hsa-miR-10b-3p	MIMAT0004556	hsa-miR-10b*	150275	CCDC117	-0.86	http://www.microrna.org/microrna/getMrna.do?gene=150275&matureName=hsa-miR-10b*&organism=9606
hsa-miR-10b-3p	MIMAT0004556	hsa-miR-10b*	55885	LMO3	-0.59	http://www.microrna.org/microrna/getMrna.do?gene=55885&matureName=hsa-miR-10b*&organism=9606
hsa-miR-10b-3p	MIMAT0004556	hsa-miR-10b*	22948	CCT5	-1	http://www.microrna.org/microrna/getMrna.do?gene=22948&matureName=hsa-miR-10b*&organism=9606
hsa-miR-10b-3p	MIMAT0004556	hsa-miR-10b*	3070	HELLS	-0.97	http://www.microrna.org/microrna/getMrna.do?gene=3070&matureName=hsa-miR-10b*&organism=9606
hsa-miR-10b-3p	MIMAT0004556	hsa-miR-10b*	3070	HELLS	-0.28	http://www.microrna.org/microrna/getMrna.do?gene=3070&matureName=hsa-miR-10b*&organism=9606
hsa-miR-10b-3p	MIMAT0004556	hsa-miR-10b*	7091	TLE4	-0.5	http://www.microrna.org/microrna/getMrna.do?gene=7091&matureName=hsa-miR-10b*&organism=9606
hsa-miR-10b-3p	MIMAT0004556	hsa-miR-10b*	23053	KIAA0913	-0.24	http://www.microrna.org/microrna/getMrna.do?gene=23053&matureName=hsa-miR-10b*&organism=9606
hsa-miR-10b-3p	MIMAT0004556	hsa-miR-10b*	158809	MAGEB6	-0.11	http://www.microrna.org/microrna/getMrna.do?gene=158809&matureName=hsa-miR-10b*&organism=9606
hsa-miR-10b-3p	MIMAT0004556	hsa-miR-10b*	344595	LOC344595	-0.12	http://www.microrna.org/microrna/getMrna.do?gene=344595&matureName=hsa-miR-10b*&organism=9606
hsa-miR-10b-3p	MIMAT0004556	hsa-miR-10b*	8706	B3GALNT1	-0.11	http://www.microrna.org/microrna/getMrna.do?gene=8706&matureName=hsa-miR-10b*&organism=9606
hsa-miR-10b-3p	MIMAT0004556	hsa-miR-10b*	57508	INTS2	-0.79	http://www.microrna.org/microrna/getMrna.do?gene=57508&matureName=hsa-miR-10b*&organism=9606
hsa-miR-10b-3p	MIMAT0004556	hsa-miR-10b*	7675	ZNF121	-0.13	http://www.microrna.org/microrna/getMrna.do?gene=7675&matureName=hsa-miR-10b*&organism=9606
hsa-miR-10b-3p	MIMAT0004556	hsa-miR-10b*	3837	KPNB1	-0.41	http://www.microrna.org/microrna/getMrna.do?gene=3837&matureName=hsa-miR-10b*&organism=9606
hsa-miR-10b-3p	MIMAT0004556	hsa-miR-10b*	4681	NBL1	-0.11	http://www.microrna.org/microrna/getMrna.do?gene=4681&matureName=hsa-miR-10b*&organism=9606
hsa-miR-10b-3p	MIMAT0004556	hsa-miR-10b*	5867	RAB4A	-0.57	http://www.microrna.org/microrna/getMrna.do?gene=5867&matureName=hsa-miR-10b*&organism=9606
hsa-miR-10b-3p	MIMAT0004556	hsa-miR-10b*	5867	RAB4A	-1.14	http://www.microrna.org/microrna/getMrna.do?gene=5867&matureName=hsa-miR-10b*&organism=9606
hsa-miR-10b-3p	MIMAT0004556	hsa-miR-10b*	3017	HIST1H2BD	-0.1	http://www.microrna.org/microrna/getMrna.do?gene=3017&matureName=hsa-miR-10b*&organism=9606
hsa-miR-10b-3p	MIMAT0004556	hsa-miR-10b*	3017	HIST1H2BD	-0.16	http://www.microrna.org/microrna/getMrna.do?gene=3017&matureName=hsa-miR-10b*&organism=9606
hsa-miR-10b-3p	MIMAT0004556	hsa-miR-10b*	55286	C4orf19	-0.4	http://www.microrna.org/microrna/getMrna.do?gene=55286&matureName=hsa-miR-10b*&organism=9606
hsa-miR-10b-3p	MIMAT0004556	hsa-miR-10b*	55286	C4orf19	-0.43	http://www.microrna.org/microrna/getMrna.do?gene=55286&matureName=hsa-miR-10b*&organism=9606
hsa-miR-10b-3p	MIMAT0004556	hsa-miR-10b*	729678	LOC729678	-0.15	http://www.microrna.org/microrna/getMrna.do?gene=729678&matureName=hsa-miR-10b*&organism=9606
hsa-miR-10b-3p	MIMAT0004556	hsa-miR-10b*	4077	NBR1	-1.03	http://www.microrna.org/microrna/getMrna.do?gene=4077&matureName=hsa-miR-10b*&organism=9606
hsa-miR-10b-3p	MIMAT0004556	hsa-miR-10b*	55207	ARL8B	-0.62	http://www.microrna.org/microrna/getMrna.do?gene=55207&matureName=hsa-miR-10b*&organism=9606
hsa-miR-10b-3p	MIMAT0004556	hsa-miR-10b*	7458	EIF4H	-0.21	http://www.microrna.org/microrna/getMrna.do?gene=7458&matureName=hsa-miR-10b*&organism=9606
hsa-miR-10b-3p	MIMAT0004556	hsa-miR-10b*	140680	C20orf96	-0.16	http://www.microrna.org/microrna/getMrna.do?gene=140680&matureName=hsa-miR-10b*&organism=9606
hsa-miR-10b-3p	MIMAT0004556	hsa-miR-10b*	196394	AMN1	-0.56	http://www.microrna.org/microrna/getMrna.do?gene=196394&matureName=hsa-miR-10b*&organism=9606
hsa-miR-10b-3p	MIMAT0004556	hsa-miR-10b*	131096	KCNH8	-0.17	http://www.microrna.org/microrna/getMrna.do?gene=131096&matureName=hsa-miR-10b*&organism=9606
hsa-miR-10b-3p	MIMAT0004556	hsa-miR-10b*	23746	AIPL1	-0.11	http://www.microrna.org/microrna/getMrna.do?gene=23746&matureName=hsa-miR-10b*&organism=9606
hsa-miR-10b-3p	MIMAT0004556	hsa-miR-10b*	8193	DPF1	-0.26	http://www.microrna.org/microrna/getMrna.do?gene=8193&matureName=hsa-miR-10b*&organism=9606
hsa-miR-10b-3p	MIMAT0004556	hsa-miR-10b*	116729	DYSFIP1	-0.13	http://www.microrna.org/microrna/getMrna.do?gene=116729&matureName=hsa-miR-10b*&organism=9606
hsa-miR-10b-3p	MIMAT0004556	hsa-miR-10b*	256714	MAP7D2	-0.1	http://www.microrna.org/microrna/getMrna.do?gene=256714&matureName=hsa-miR-10b*&organism=9606
hsa-miR-10b-3p	MIMAT0004556	hsa-miR-10b*	441355	FLJ39080	-0.55	http://www.microrna.org/microrna/getMrna.do?gene=441355&matureName=hsa-miR-10b*&organism=9606
hsa-miR-10b-3p	MIMAT0004556	hsa-miR-10b*	23411	SIRT1	-0.23	http://www.microrna.org/microrna/getMrna.do?gene=23411&matureName=hsa-miR-10b*&organism=9606
hsa-miR-10b-3p	MIMAT0004556	hsa-miR-10b*	889	KRIT1	-0.92	http://www.microrna.org/microrna/getMrna.do?gene=889&matureName=hsa-miR-10b*&organism=9606
hsa-miR-10b-3p	MIMAT0004556	hsa-miR-10b*	3137	HLA-J	-1.26	http://www.microrna.org/microrna/getMrna.do?gene=3137&matureName=hsa-miR-10b*&organism=9606
hsa-miR-10b-3p	MIMAT0004556	hsa-miR-10b*	256369	C14orf48	-0.23	http://www.microrna.org/microrna/getMrna.do?gene=256369&matureName=hsa-miR-10b*&organism=9606
hsa-miR-10b-3p	MIMAT0004556	hsa-miR-10b*	2804	GOLGB1	-0.1	http://www.microrna.org/microrna/getMrna.do?gene=2804&matureName=hsa-miR-10b*&organism=9606
hsa-miR-10b-3p	MIMAT0004556	hsa-miR-10b*	1789	DNMT3B	-0.14	http://www.microrna.org/microrna/getMrna.do?gene=1789&matureName=hsa-miR-10b*&organism=9606
hsa-miR-10b-3p	MIMAT0004556	hsa-miR-10b*	23165	NUP205	-0.58	http://www.microrna.org/microrna/getMrna.do?gene=23165&matureName=hsa-miR-10b*&organism=9606
hsa-miR-10b-3p	MIMAT0004556	hsa-miR-10b*	23165	NUP205	-0.43	http://www.microrna.org/microrna/getMrna.do?gene=23165&matureName=hsa-miR-10b*&organism=9606
hsa-miR-10b-3p	MIMAT0004556	hsa-miR-10b*	10479	SLC9A6	-0.1	http://www.microrna.org/microrna/getMrna.do?gene=10479&matureName=hsa-miR-10b*&organism=9606
hsa-miR-10b-3p	MIMAT0004556	hsa-miR-10b*	134957	STXBP5	-0.14	http://www.microrna.org/microrna/getMrna.do?gene=134957&matureName=hsa-miR-10b*&organism=9606
hsa-miR-10b-3p	MIMAT0004556	hsa-miR-10b*	329	BIRC2	-0.15	http://www.microrna.org/microrna/getMrna.do?gene=329&matureName=hsa-miR-10b*&organism=9606
hsa-miR-10b-3p	MIMAT0004556	hsa-miR-10b*	9767	PHF16	-0.92	http://www.microrna.org/microrna/getMrna.do?gene=9767&matureName=hsa-miR-10b*&organism=9606
hsa-miR-10b-3p	MIMAT0004556	hsa-miR-10b*	29078	NDUFAF4	-0.21	http://www.microrna.org/microrna/getMrna.do?gene=29078&matureName=hsa-miR-10b*&organism=9606
hsa-miR-10b-3p	MIMAT0004556	hsa-miR-10b*	56658	TRIM39	-0.61	http://www.microrna.org/microrna/getMrna.do?gene=56658&matureName=hsa-miR-10b*&organism=9606
hsa-miR-10b-3p	MIMAT0004556	hsa-miR-10b*	9545	RAB3D	-0.24	http://www.microrna.org/microrna/getMrna.do?gene=9545&matureName=hsa-miR-10b*&organism=9606
hsa-miR-10b-3p	MIMAT0004556	hsa-miR-10b*	57209	ZNF248	-0.53	http://www.microrna.org/microrna/getMrna.do?gene=57209&matureName=hsa-miR-10b*&organism=9606
hsa-miR-10b-3p	MIMAT0004556	hsa-miR-10b*	57209	ZNF248	-0.19	http://www.microrna.org/microrna/getMrna.do?gene=57209&matureName=hsa-miR-10b*&organism=9606
hsa-miR-10b-3p	MIMAT0004556	hsa-miR-10b*	57209	ZNF248	-0.29	http://www.microrna.org/microrna/getMrna.do?gene=57209&matureName=hsa-miR-10b*&organism=9606
hsa-miR-10b-3p	MIMAT0004556	hsa-miR-10b*	5362	PLXNA2	-0.25	http://www.microrna.org/microrna/getMrna.do?gene=5362&matureName=hsa-miR-10b*&organism=9606
hsa-miR-10b-3p	MIMAT0004556	hsa-miR-10b*	55216	C11orf57	-0.36	http://www.microrna.org/microrna/getMrna.do?gene=55216&matureName=hsa-miR-10b*&organism=9606
hsa-miR-10b-3p	MIMAT0004556	hsa-miR-10b*	8076	MFAP5	-0.69	http://www.microrna.org/microrna/getMrna.do?gene=8076&matureName=hsa-miR-10b*&organism=9606
hsa-miR-10b-3p	MIMAT0004556	hsa-miR-10b*	114881	OSBPL7	-0.16	http://www.microrna.org/microrna/getMrna.do?gene=114881&matureName=hsa-miR-10b*&organism=9606
hsa-miR-10b-3p	MIMAT0004556	hsa-miR-10b*	2672	GFI1	-0.12	http://www.microrna.org/microrna/getMrna.do?gene=2672&matureName=hsa-miR-10b*&organism=9606
hsa-miR-10b-3p	MIMAT0004556	hsa-miR-10b*	23271	CAMSAP1L1	-0.16	http://www.microrna.org/microrna/getMrna.do?gene=23271&matureName=hsa-miR-10b*&organism=9606
hsa-miR-10b-3p	MIMAT0004556	hsa-miR-10b*	9025	RNF8	-0.3	http://www.microrna.org/microrna/getMrna.do?gene=9025&matureName=hsa-miR-10b*&organism=9606
hsa-miR-10b-3p	MIMAT0004556	hsa-miR-10b*	338949	TMEM202	-1.24	http://www.microrna.org/microrna/getMrna.do?gene=338949&matureName=hsa-miR-10b*&organism=9606
hsa-miR-10b-3p	MIMAT0004556	hsa-miR-10b*	65217	PCDH15	-1.18	http://www.microrna.org/microrna/getMrna.do?gene=65217&matureName=hsa-miR-10b*&organism=9606
hsa-miR-10b-3p	MIMAT0004556	hsa-miR-10b*	5476	CTSA	-0.69	http://www.microrna.org/microrna/getMrna.do?gene=5476&matureName=hsa-miR-10b*&organism=9606
hsa-miR-10b-3p	MIMAT0004556	hsa-miR-10b*	9972	NUP153	-0.94	http://www.microrna.org/microrna/getMrna.do?gene=9972&matureName=hsa-miR-10b*&organism=9606
hsa-miR-10b-3p	MIMAT0004556	hsa-miR-10b*	9972	NUP153	-0.13	http://www.microrna.org/microrna/getMrna.do?gene=9972&matureName=hsa-miR-10b*&organism=9606
hsa-miR-10b-3p	MIMAT0004556	hsa-miR-10b*	219670	ENKUR	-0.47	http://www.microrna.org/microrna/getMrna.do?gene=219670&matureName=hsa-miR-10b*&organism=9606
hsa-miR-10b-3p	MIMAT0004556	hsa-miR-10b*	3655	ITGA6	-0.66	http://www.microrna.org/microrna/getMrna.do?gene=3655&matureName=hsa-miR-10b*&organism=9606
hsa-miR-10b-3p	MIMAT0004556	hsa-miR-10b*	89781	HPS4	-0.12	http://www.microrna.org/microrna/getMrna.do?gene=89781&matureName=hsa-miR-10b*&organism=9606
hsa-miR-10b-3p	MIMAT0004556	hsa-miR-10b*	26996	GPR160	-0.1	http://www.microrna.org/microrna/getMrna.do?gene=26996&matureName=hsa-miR-10b*&organism=9606
hsa-miR-10b-3p	MIMAT0004556	hsa-miR-10b*	64399	HHIP	-0.11	http://www.microrna.org/microrna/getMrna.do?gene=64399&matureName=hsa-miR-10b*&organism=9606
hsa-miR-10b-3p	MIMAT0004556	hsa-miR-10b*	55625	ZDHHC7	-0.32	http://www.microrna.org/microrna/getMrna.do?gene=55625&matureName=hsa-miR-10b*&organism=9606
hsa-miR-10b-3p	MIMAT0004556	hsa-miR-10b*	64756	ATPAF1	-0.3	http://www.microrna.org/microrna/getMrna.do?gene=64756&matureName=hsa-miR-10b*&organism=9606
hsa-miR-10b-3p	MIMAT0004556	hsa-miR-10b*	51384	WNT16	-0.23	http://www.microrna.org/microrna/getMrna.do?gene=51384&matureName=hsa-miR-10b*&organism=9606
hsa-miR-10b-3p	MIMAT0004556	hsa-miR-10b*	51384	WNT16	-0.14	http://www.microrna.org/microrna/getMrna.do?gene=51384&matureName=hsa-miR-10b*&organism=9606
hsa-miR-10b-3p	MIMAT0004556	hsa-miR-10b*	51384	WNT16	-0.17	http://www.microrna.org/microrna/getMrna.do?gene=51384&matureName=hsa-miR-10b*&organism=9606
hsa-miR-10b-3p	MIMAT0004556	hsa-miR-10b*	9632	SEC24C	-0.11	http://www.microrna.org/microrna/getMrna.do?gene=9632&matureName=hsa-miR-10b*&organism=9606
hsa-miR-10b-3p	MIMAT0004556	hsa-miR-10b*	56670	SUCNR1	-0.8	http://www.microrna.org/microrna/getMrna.do?gene=56670&matureName=hsa-miR-10b*&organism=9606
hsa-miR-10b-3p	MIMAT0004556	hsa-miR-10b*	4820	NKTR	-0.1	http://www.microrna.org/microrna/getMrna.do?gene=4820&matureName=hsa-miR-10b*&organism=9606
hsa-miR-10b-3p	MIMAT0004556	hsa-miR-10b*	23063	WAPAL	-0.11	http://www.microrna.org/microrna/getMrna.do?gene=23063&matureName=hsa-miR-10b*&organism=9606
hsa-miR-10b-3p	MIMAT0004556	hsa-miR-10b*	2669	GEM	-1.23	http://www.microrna.org/microrna/getMrna.do?gene=2669&matureName=hsa-miR-10b*&organism=9606
hsa-miR-10b-3p	MIMAT0004556	hsa-miR-10b*	128178	EDARADD	-0.52	http://www.microrna.org/microrna/getMrna.do?gene=128178&matureName=hsa-miR-10b*&organism=9606
hsa-miR-10b-3p	MIMAT0004556	hsa-miR-10b*	4111	MAGEA12	-0.25	http://www.microrna.org/microrna/getMrna.do?gene=4111&matureName=hsa-miR-10b*&organism=9606
hsa-miR-10b-3p	MIMAT0004556	hsa-miR-10b*	10260	DENND4A	-0.99	http://www.microrna.org/microrna/getMrna.do?gene=10260&matureName=hsa-miR-10b*&organism=9606
hsa-miR-10b-3p	MIMAT0004556	hsa-miR-10b*	163	AP2B1	-0.81	http://www.microrna.org/microrna/getMrna.do?gene=163&matureName=hsa-miR-10b*&organism=9606
hsa-miR-10b-3p	MIMAT0004556	hsa-miR-10b*	613266	LOC613266	-0.11	http://www.microrna.org/microrna/getMrna.do?gene=613266&matureName=hsa-miR-10b*&organism=9606
hsa-miR-10b-3p	MIMAT0004556	hsa-miR-10b*	10144	FAM13A	-0.41	http://www.microrna.org/microrna/getMrna.do?gene=10144&matureName=hsa-miR-10b*&organism=9606
hsa-miR-10b-3p	MIMAT0004556	hsa-miR-10b*	10144	FAM13A	-0.8	http://www.microrna.org/microrna/getMrna.do?gene=10144&matureName=hsa-miR-10b*&organism=9606
hsa-miR-10b-3p	MIMAT0004556	hsa-miR-10b*	9282	MED14	-0.17	http://www.microrna.org/microrna/getMrna.do?gene=9282&matureName=hsa-miR-10b*&organism=9606
hsa-miR-10b-3p	MIMAT0004556	hsa-miR-10b*	167681	PRSS35	-0.56	http://www.microrna.org/microrna/getMrna.do?gene=167681&matureName=hsa-miR-10b*&organism=9606
hsa-miR-10b-3p	MIMAT0004556	hsa-miR-10b*	2258	FGF13	-1.04	http://www.microrna.org/microrna/getMrna.do?gene=2258&matureName=hsa-miR-10b*&organism=9606
hsa-miR-10b-3p	MIMAT0004556	hsa-miR-10b*	2258	FGF13	-0.18	http://www.microrna.org/microrna/getMrna.do?gene=2258&matureName=hsa-miR-10b*&organism=9606
hsa-miR-10b-3p	MIMAT0004556	hsa-miR-10b*	57608	KIAA1462	-0.35	http://www.microrna.org/microrna/getMrna.do?gene=57608&matureName=hsa-miR-10b*&organism=9606
hsa-miR-10b-3p	MIMAT0004556	hsa-miR-10b*	51406	NOL7	-0.51	http://www.microrna.org/microrna/getMrna.do?gene=51406&matureName=hsa-miR-10b*&organism=9606
hsa-miR-10b-3p	MIMAT0004556	hsa-miR-10b*	50515	CHST11	-0.81	http://www.microrna.org/microrna/getMrna.do?gene=50515&matureName=hsa-miR-10b*&organism=9606
hsa-miR-10b-3p	MIMAT0004556	hsa-miR-10b*	4300	MLLT3	-0.13	http://www.microrna.org/microrna/getMrna.do?gene=4300&matureName=hsa-miR-10b*&organism=9606
hsa-miR-10b-3p	MIMAT0004556	hsa-miR-10b*	185	AGTR1	-0.1	http://www.microrna.org/microrna/getMrna.do?gene=185&matureName=hsa-miR-10b*&organism=9606
hsa-miR-10b-3p	MIMAT0004556	hsa-miR-10b*	10730	YME1L1	-0.1	http://www.microrna.org/microrna/getMrna.do?gene=10730&matureName=hsa-miR-10b*&organism=9606
hsa-miR-10b-3p	MIMAT0004556	hsa-miR-10b*	2736	GLI2	-0.6	http://www.microrna.org/microrna/getMrna.do?gene=2736&matureName=hsa-miR-10b*&organism=9606
hsa-miR-10b-3p	MIMAT0004556	hsa-miR-10b*	9527	GOSR1	-0.1	http://www.microrna.org/microrna/getMrna.do?gene=9527&matureName=hsa-miR-10b*&organism=9606
hsa-miR-10b-3p	MIMAT0004556	hsa-miR-10b*	23034	SAMD4A	-0.38	http://www.microrna.org/microrna/getMrna.do?gene=23034&matureName=hsa-miR-10b*&organism=9606
hsa-miR-10b-3p	MIMAT0004556	hsa-miR-10b*	149175	MANEAL	-0.14	http://www.microrna.org/microrna/getMrna.do?gene=149175&matureName=hsa-miR-10b*&organism=9606
hsa-miR-10b-3p	MIMAT0004556	hsa-miR-10b*	8723	SNX4	-0.16	http://www.microrna.org/microrna/getMrna.do?gene=8723&matureName=hsa-miR-10b*&organism=9606
hsa-miR-10b-3p	MIMAT0004556	hsa-miR-10b*	3134	HLA-F	-1.31	http://www.microrna.org/microrna/getMrna.do?gene=3134&matureName=hsa-miR-10b*&organism=9606
hsa-miR-10b-3p	MIMAT0004556	hsa-miR-10b*	57282	SLC4A10	-0.56	http://www.microrna.org/microrna/getMrna.do?gene=57282&matureName=hsa-miR-10b*&organism=9606
hsa-miR-10b-3p	MIMAT0004556	hsa-miR-10b*	2635	GBP3	-0.11	http://www.microrna.org/microrna/getMrna.do?gene=2635&matureName=hsa-miR-10b*&organism=9606
hsa-miR-10b-3p	MIMAT0004556	hsa-miR-10b*	55266	TMEM19	-0.65	http://www.microrna.org/microrna/getMrna.do?gene=55266&matureName=hsa-miR-10b*&organism=9606
hsa-miR-10b-3p	MIMAT0004556	hsa-miR-10b*	10483	SEC23B	-0.13	http://www.microrna.org/microrna/getMrna.do?gene=10483&matureName=hsa-miR-10b*&organism=9606
hsa-miR-10b-3p	MIMAT0004556	hsa-miR-10b*	10483	SEC23B	-0.46	http://www.microrna.org/microrna/getMrna.do?gene=10483&matureName=hsa-miR-10b*&organism=9606
hsa-miR-10b-3p	MIMAT0004556	hsa-miR-10b*	59277	NTN4	-0.75	http://www.microrna.org/microrna/getMrna.do?gene=59277&matureName=hsa-miR-10b*&organism=9606
hsa-miR-10b-3p	MIMAT0004556	hsa-miR-10b*	91151	TIGD7	-0.28	http://www.microrna.org/microrna/getMrna.do?gene=91151&matureName=hsa-miR-10b*&organism=9606
hsa-miR-10b-3p	MIMAT0004556	hsa-miR-10b*	160335	TMTC2	-0.46	http://www.microrna.org/microrna/getMrna.do?gene=160335&matureName=hsa-miR-10b*&organism=9606
hsa-miR-10b-3p	MIMAT0004556	hsa-miR-10b*	25940	FAM98A	-1.18	http://www.microrna.org/microrna/getMrna.do?gene=25940&matureName=hsa-miR-10b*&organism=9606
hsa-miR-10b-3p	MIMAT0004556	hsa-miR-10b*	158405	KIAA1958	-0.16	http://www.microrna.org/microrna/getMrna.do?gene=158405&matureName=hsa-miR-10b*&organism=9606
hsa-miR-10b-3p	MIMAT0004556	hsa-miR-10b*	285852	TREML4	-0.43	http://www.microrna.org/microrna/getMrna.do?gene=285852&matureName=hsa-miR-10b*&organism=9606
hsa-miR-10b-3p	MIMAT0004556	hsa-miR-10b*	1912	PHC2	-0.57	http://www.microrna.org/microrna/getMrna.do?gene=1912&matureName=hsa-miR-10b*&organism=9606
hsa-miR-10b-3p	MIMAT0004556	hsa-miR-10b*	1912	PHC2	-0.12	http://www.microrna.org/microrna/getMrna.do?gene=1912&matureName=hsa-miR-10b*&organism=9606
hsa-miR-10b-3p	MIMAT0004556	hsa-miR-10b*	5010	CLDN11	-0.59	http://www.microrna.org/microrna/getMrna.do?gene=5010&matureName=hsa-miR-10b*&organism=9606
hsa-miR-10b-3p	MIMAT0004556	hsa-miR-10b*	5010	CLDN11	-0.45	http://www.microrna.org/microrna/getMrna.do?gene=5010&matureName=hsa-miR-10b*&organism=9606
hsa-miR-10b-3p	MIMAT0004556	hsa-miR-10b*	65983	GRAMD3	-0.2	http://www.microrna.org/microrna/getMrna.do?gene=65983&matureName=hsa-miR-10b*&organism=9606
hsa-miR-10b-3p	MIMAT0004556	hsa-miR-10b*	65983	GRAMD3	-0.64	http://www.microrna.org/microrna/getMrna.do?gene=65983&matureName=hsa-miR-10b*&organism=9606
hsa-miR-10b-3p	MIMAT0004556	hsa-miR-10b*	54848	ARHGEF38	-0.16	http://www.microrna.org/microrna/getMrna.do?gene=54848&matureName=hsa-miR-10b*&organism=9606
hsa-miR-10b-3p	MIMAT0004556	hsa-miR-10b*	202781	LOC202781	-0.13	http://www.microrna.org/microrna/getMrna.do?gene=202781&matureName=hsa-miR-10b*&organism=9606
hsa-miR-10b-3p	MIMAT0004556	hsa-miR-10b*	8560	DEGS1	-0.18	http://www.microrna.org/microrna/getMrna.do?gene=8560&matureName=hsa-miR-10b*&organism=9606
hsa-miR-10b-3p	MIMAT0004556	hsa-miR-10b*	401251	C6orf26	-0.74	http://www.microrna.org/microrna/getMrna.do?gene=401251&matureName=hsa-miR-10b*&organism=9606
hsa-miR-10b-3p	MIMAT0004556	hsa-miR-10b*	401251	C6orf26	-0.14	http://www.microrna.org/microrna/getMrna.do?gene=401251&matureName=hsa-miR-10b*&organism=9606
hsa-miR-10b-3p	MIMAT0004556	hsa-miR-10b*	2246	FGF1	-0.19	http://www.microrna.org/microrna/getMrna.do?gene=2246&matureName=hsa-miR-10b*&organism=9606
hsa-miR-10b-3p	MIMAT0004556	hsa-miR-10b*	150472	CBWD2	-0.12	http://www.microrna.org/microrna/getMrna.do?gene=150472&matureName=hsa-miR-10b*&organism=9606
hsa-miR-10b-3p	MIMAT0004556	hsa-miR-10b*	23683	PRKD3	-0.39	http://www.microrna.org/microrna/getMrna.do?gene=23683&matureName=hsa-miR-10b*&organism=9606
hsa-miR-10b-3p	MIMAT0004556	hsa-miR-10b*	132204	SYNPR	-0.64	http://www.microrna.org/microrna/getMrna.do?gene=132204&matureName=hsa-miR-10b*&organism=9606
hsa-miR-10b-3p	MIMAT0004556	hsa-miR-10b*	166793	ZBTB49	-0.19	http://www.microrna.org/microrna/getMrna.do?gene=166793&matureName=hsa-miR-10b*&organism=9606
hsa-miR-10b-3p	MIMAT0004556	hsa-miR-10b*	255025	LOC255025	-0.89	http://www.microrna.org/microrna/getMrna.do?gene=255025&matureName=hsa-miR-10b*&organism=9606
hsa-miR-10b-3p	MIMAT0004556	hsa-miR-10b*	186	AGTR2	-1.03	http://www.microrna.org/microrna/getMrna.do?gene=186&matureName=hsa-miR-10b*&organism=9606
hsa-miR-10b-3p	MIMAT0004556	hsa-miR-10b*	117178	SSX2IP	-0.11	http://www.microrna.org/microrna/getMrna.do?gene=117178&matureName=hsa-miR-10b*&organism=9606
hsa-miR-10b-3p	MIMAT0004556	hsa-miR-10b*	117178	SSX2IP	-0.13	http://www.microrna.org/microrna/getMrna.do?gene=117178&matureName=hsa-miR-10b*&organism=9606
hsa-miR-10b-3p	MIMAT0004556	hsa-miR-10b*	6854	SYN2	-0.14	http://www.microrna.org/microrna/getMrna.do?gene=6854&matureName=hsa-miR-10b*&organism=9606
hsa-miR-10b-3p	MIMAT0004556	hsa-miR-10b*	5209	PFKFB3	-0.11	http://www.microrna.org/microrna/getMrna.do?gene=5209&matureName=hsa-miR-10b*&organism=9606
hsa-miR-10b-3p	MIMAT0004556	hsa-miR-10b*	60488	MRPS35	-0.11	http://www.microrna.org/microrna/getMrna.do?gene=60488&matureName=hsa-miR-10b*&organism=9606
hsa-miR-10b-3p	MIMAT0004556	hsa-miR-10b*	128344	C1orf88	-1.02	http://www.microrna.org/microrna/getMrna.do?gene=128344&matureName=hsa-miR-10b*&organism=9606
hsa-miR-10b-3p	MIMAT0004556	hsa-miR-10b*	3953	LEPR	-0.19	http://www.microrna.org/microrna/getMrna.do?gene=3953&matureName=hsa-miR-10b*&organism=9606
hsa-miR-10b-3p	MIMAT0004556	hsa-miR-10b*	4232	MEST	-0.97	http://www.microrna.org/microrna/getMrna.do?gene=4232&matureName=hsa-miR-10b*&organism=9606
hsa-miR-10b-3p	MIMAT0004556	hsa-miR-10b*	55176	SEC61A2	-0.26	http://www.microrna.org/microrna/getMrna.do?gene=55176&matureName=hsa-miR-10b*&organism=9606
hsa-miR-10b-3p	MIMAT0004556	hsa-miR-10b*	7005	TEAD3	-0.67	http://www.microrna.org/microrna/getMrna.do?gene=7005&matureName=hsa-miR-10b*&organism=9606
hsa-miR-10b-3p	MIMAT0004556	hsa-miR-10b*	6996	TDG	-0.13	http://www.microrna.org/microrna/getMrna.do?gene=6996&matureName=hsa-miR-10b*&organism=9606
hsa-miR-10b-3p	MIMAT0004556	hsa-miR-10b*	26284	ERAL1	-0.38	http://www.microrna.org/microrna/getMrna.do?gene=26284&matureName=hsa-miR-10b*&organism=9606
hsa-miR-10b-3p	MIMAT0004556	hsa-miR-10b*	10096	ACTR3	-0.29	http://www.microrna.org/microrna/getMrna.do?gene=10096&matureName=hsa-miR-10b*&organism=9606
hsa-miR-10b-3p	MIMAT0004556	hsa-miR-10b*	64092	SAMSN1	-0.39	http://www.microrna.org/microrna/getMrna.do?gene=64092&matureName=hsa-miR-10b*&organism=9606
hsa-miR-10b-3p	MIMAT0004556	hsa-miR-10b*	283551	C14orf182	-0.84	http://www.microrna.org/microrna/getMrna.do?gene=283551&matureName=hsa-miR-10b*&organism=9606
hsa-miR-10b-3p	MIMAT0004556	hsa-miR-10b*	23418	CRB1	-0.1	http://www.microrna.org/microrna/getMrna.do?gene=23418&matureName=hsa-miR-10b*&organism=9606
hsa-miR-10b-3p	MIMAT0004556	hsa-miR-10b*	85413	SLC22A16	-0.1	http://www.microrna.org/microrna/getMrna.do?gene=85413&matureName=hsa-miR-10b*&organism=9606
hsa-miR-10b-3p	MIMAT0004556	hsa-miR-10b*	27316	RBMX	-0.38	http://www.microrna.org/microrna/getMrna.do?gene=27316&matureName=hsa-miR-10b*&organism=9606
hsa-miR-10b-3p	MIMAT0004556	hsa-miR-10b*	1268	CNR1	-0.52	http://www.microrna.org/microrna/getMrna.do?gene=1268&matureName=hsa-miR-10b*&organism=9606
hsa-miR-10b-3p	MIMAT0004556	hsa-miR-10b*	26054	SENP6	-0.43	http://www.microrna.org/microrna/getMrna.do?gene=26054&matureName=hsa-miR-10b*&organism=9606
hsa-miR-10b-3p	MIMAT0004556	hsa-miR-10b*	6606	SMN1	-0.1	http://www.microrna.org/microrna/getMrna.do?gene=6606&matureName=hsa-miR-10b*&organism=9606
hsa-miR-10b-3p	MIMAT0004556	hsa-miR-10b*	8476	CDC42BPA	-0.17	http://www.microrna.org/microrna/getMrna.do?gene=8476&matureName=hsa-miR-10b*&organism=9606
hsa-miR-10b-3p	MIMAT0004556	hsa-miR-10b*	7531	YWHAE	-1.16	http://www.microrna.org/microrna/getMrna.do?gene=7531&matureName=hsa-miR-10b*&organism=9606
hsa-miR-10b-3p	MIMAT0004556	hsa-miR-10b*	51185	CRBN	-0.67	http://www.microrna.org/microrna/getMrna.do?gene=51185&matureName=hsa-miR-10b*&organism=9606
hsa-miR-10b-3p	MIMAT0004556	hsa-miR-10b*	22802	CLCA4	-0.21	http://www.microrna.org/microrna/getMrna.do?gene=22802&matureName=hsa-miR-10b*&organism=9606
hsa-miR-10b-3p	MIMAT0004556	hsa-miR-10b*	7335	UBE2V1	-0.35	http://www.microrna.org/microrna/getMrna.do?gene=7335&matureName=hsa-miR-10b*&organism=9606
hsa-miR-10b-3p	MIMAT0004556	hsa-miR-10b*	6594	SMARCA1	-0.12	http://www.microrna.org/microrna/getMrna.do?gene=6594&matureName=hsa-miR-10b*&organism=9606
hsa-miR-10b-3p	MIMAT0004556	hsa-miR-10b*	103	ADAR	-1.05	http://www.microrna.org/microrna/getMrna.do?gene=103&matureName=hsa-miR-10b*&organism=9606
hsa-miR-10b-3p	MIMAT0004556	hsa-miR-10b*	388335	TMEM220	-0.28	http://www.microrna.org/microrna/getMrna.do?gene=388335&matureName=hsa-miR-10b*&organism=9606
hsa-miR-10b-3p	MIMAT0004556	hsa-miR-10b*	2566	GABRG2	-0.83	http://www.microrna.org/microrna/getMrna.do?gene=2566&matureName=hsa-miR-10b*&organism=9606
hsa-miR-10b-3p	MIMAT0004556	hsa-miR-10b*	283349	RASSF3	-0.16	http://www.microrna.org/microrna/getMrna.do?gene=283349&matureName=hsa-miR-10b*&organism=9606
hsa-miR-10b-3p	MIMAT0004556	hsa-miR-10b*	53405	CLIC5	-0.66	http://www.microrna.org/microrna/getMrna.do?gene=53405&matureName=hsa-miR-10b*&organism=9606
hsa-miR-10b-3p	MIMAT0004556	hsa-miR-10b*	960	CD44	-0.97	http://www.microrna.org/microrna/getMrna.do?gene=960&matureName=hsa-miR-10b*&organism=9606
hsa-miR-10b-3p	MIMAT0004556	hsa-miR-10b*	474149	TTTY4B	-0.28	http://www.microrna.org/microrna/getMrna.do?gene=474149&matureName=hsa-miR-10b*&organism=9606
hsa-miR-10b-3p	MIMAT0004556	hsa-miR-10b*	80204	FBXO11	-0.95	http://www.microrna.org/microrna/getMrna.do?gene=80204&matureName=hsa-miR-10b*&organism=9606
hsa-miR-10b-3p	MIMAT0004556	hsa-miR-10b*	84824	FCRLA	-0.18	http://www.microrna.org/microrna/getMrna.do?gene=84824&matureName=hsa-miR-10b*&organism=9606
hsa-miR-10b-3p	MIMAT0004556	hsa-miR-10b*	114971	PTPMT1	-0.33	http://www.microrna.org/microrna/getMrna.do?gene=114971&matureName=hsa-miR-10b*&organism=9606
hsa-miR-10b-3p	MIMAT0004556	hsa-miR-10b*	80333	KCNIP4	-1.04	http://www.microrna.org/microrna/getMrna.do?gene=80333&matureName=hsa-miR-10b*&organism=9606
hsa-miR-10b-3p	MIMAT0004556	hsa-miR-10b*	54462	FAM190B	-0.57	http://www.microrna.org/microrna/getMrna.do?gene=54462&matureName=hsa-miR-10b*&organism=9606
hsa-miR-10b-3p	MIMAT0004556	hsa-miR-10b*	222484	LNX2	-1.05	http://www.microrna.org/microrna/getMrna.do?gene=222484&matureName=hsa-miR-10b*&organism=9606
hsa-miR-10b-3p	MIMAT0004556	hsa-miR-10b*	8934	RAB7L1	-0.26	http://www.microrna.org/microrna/getMrna.do?gene=8934&matureName=hsa-miR-10b*&organism=9606
hsa-miR-10b-3p	MIMAT0004556	hsa-miR-10b*	84547	PGBD1	-0.23	http://www.microrna.org/microrna/getMrna.do?gene=84547&matureName=hsa-miR-10b*&organism=9606
hsa-miR-10b-3p	MIMAT0004556	hsa-miR-10b*	80331	DNAJC5	-0.24	http://www.microrna.org/microrna/getMrna.do?gene=80331&matureName=hsa-miR-10b*&organism=9606
hsa-miR-10b-3p	MIMAT0004556	hsa-miR-10b*	253724	LOC253724	-0.65	http://www.microrna.org/microrna/getMrna.do?gene=253724&matureName=hsa-miR-10b*&organism=9606
hsa-miR-10b-3p	MIMAT0004556	hsa-miR-10b*	132864	CPEB2	-0.15	http://www.microrna.org/microrna/getMrna.do?gene=132864&matureName=hsa-miR-10b*&organism=9606
hsa-miR-10b-3p	MIMAT0004556	hsa-miR-10b*	132864	CPEB2	-0.16	http://www.microrna.org/microrna/getMrna.do?gene=132864&matureName=hsa-miR-10b*&organism=9606
hsa-miR-10b-3p	MIMAT0004556	hsa-miR-10b*	9816	URB2	-0.99	http://www.microrna.org/microrna/getMrna.do?gene=9816&matureName=hsa-miR-10b*&organism=9606
hsa-miR-10b-3p	MIMAT0004556	hsa-miR-10b*	1392	CRH	-0.44	http://www.microrna.org/microrna/getMrna.do?gene=1392&matureName=hsa-miR-10b*&organism=9606
hsa-miR-10b-3p	MIMAT0004556	hsa-miR-10b*	6839	SUV39H1	-0.2	http://www.microrna.org/microrna/getMrna.do?gene=6839&matureName=hsa-miR-10b*&organism=9606
hsa-miR-10b-3p	MIMAT0004556	hsa-miR-10b*	6314	ATXN7	-0.25	http://www.microrna.org/microrna/getMrna.do?gene=6314&matureName=hsa-miR-10b*&organism=9606
hsa-miR-10b-3p	MIMAT0004556	hsa-miR-10b*	9451	EIF2AK3	-0.56	http://www.microrna.org/microrna/getMrna.do?gene=9451&matureName=hsa-miR-10b*&organism=9606
hsa-miR-10b-3p	MIMAT0004556	hsa-miR-10b*	89932	PAPLN	-0.23	http://www.microrna.org/microrna/getMrna.do?gene=89932&matureName=hsa-miR-10b*&organism=9606
hsa-miR-10b-3p	MIMAT0004556	hsa-miR-10b*	89932	PAPLN	-0.11	http://www.microrna.org/microrna/getMrna.do?gene=89932&matureName=hsa-miR-10b*&organism=9606
hsa-miR-10b-3p	MIMAT0004556	hsa-miR-10b*	165215	FAM171B	-0.1	http://www.microrna.org/microrna/getMrna.do?gene=165215&matureName=hsa-miR-10b*&organism=9606
hsa-miR-10b-3p	MIMAT0004556	hsa-miR-10b*	643803	KRTAP24-1	-0.11	http://www.microrna.org/microrna/getMrna.do?gene=643803&matureName=hsa-miR-10b*&organism=9606
hsa-miR-10b-3p	MIMAT0004556	hsa-miR-10b*	643803	KRTAP24-1	-0.12	http://www.microrna.org/microrna/getMrna.do?gene=643803&matureName=hsa-miR-10b*&organism=9606
hsa-miR-10b-3p	MIMAT0004556	hsa-miR-10b*	6400	SEL1L	-0.98	http://www.microrna.org/microrna/getMrna.do?gene=6400&matureName=hsa-miR-10b*&organism=9606
hsa-miR-10b-3p	MIMAT0004556	hsa-miR-10b*	27229	TUBGCP4	-0.66	http://www.microrna.org/microrna/getMrna.do?gene=27229&matureName=hsa-miR-10b*&organism=9606
hsa-miR-10b-3p	MIMAT0004556	hsa-miR-10b*	57157	PHTF2	-0.34	http://www.microrna.org/microrna/getMrna.do?gene=57157&matureName=hsa-miR-10b*&organism=9606
hsa-miR-10b-3p	MIMAT0004556	hsa-miR-10b*	5209	PFKFB3	-0.14	http://www.microrna.org/microrna/getMrna.do?gene=5209&matureName=hsa-miR-10b*&organism=9606
hsa-miR-10b-3p	MIMAT0004556	hsa-miR-10b*	64397	ZFP106	-0.44	http://www.microrna.org/microrna/getMrna.do?gene=64397&matureName=hsa-miR-10b*&organism=9606
hsa-miR-10b-3p	MIMAT0004556	hsa-miR-10b*	9562	MINPP1	-0.22	http://www.microrna.org/microrna/getMrna.do?gene=9562&matureName=hsa-miR-10b*&organism=9606
hsa-miR-10b-3p	MIMAT0004556	hsa-miR-10b*	375611	SLC26A5	-0.18	http://www.microrna.org/microrna/getMrna.do?gene=375611&matureName=hsa-miR-10b*&organism=9606
hsa-miR-10b-3p	MIMAT0004556	hsa-miR-10b*	375611	SLC26A5	-0.2	http://www.microrna.org/microrna/getMrna.do?gene=375611&matureName=hsa-miR-10b*&organism=9606
hsa-miR-10b-3p	MIMAT0004556	hsa-miR-10b*	285282	RABL3	-0.16	http://www.microrna.org/microrna/getMrna.do?gene=285282&matureName=hsa-miR-10b*&organism=9606
hsa-miR-10b-3p	MIMAT0004556	hsa-miR-10b*	920	CD4	-0.15	http://www.microrna.org/microrna/getMrna.do?gene=920&matureName=hsa-miR-10b*&organism=9606
hsa-miR-10b-3p	MIMAT0004556	hsa-miR-10b*	26058	GIGYF2	-0.11	http://www.microrna.org/microrna/getMrna.do?gene=26058&matureName=hsa-miR-10b*&organism=9606
hsa-miR-10b-3p	MIMAT0004556	hsa-miR-10b*	6829	SUPT5H	-0.37	http://www.microrna.org/microrna/getMrna.do?gene=6829&matureName=hsa-miR-10b*&organism=9606
hsa-miR-10b-3p	MIMAT0004556	hsa-miR-10b*	23536	ADAT1	-0.52	http://www.microrna.org/microrna/getMrna.do?gene=23536&matureName=hsa-miR-10b*&organism=9606
hsa-miR-10b-3p	MIMAT0004556	hsa-miR-10b*	84937	ZNRF1	-0.28	http://www.microrna.org/microrna/getMrna.do?gene=84937&matureName=hsa-miR-10b*&organism=9606
hsa-miR-10b-3p	MIMAT0004556	hsa-miR-10b*	780	DDR1	-0.32	http://www.microrna.org/microrna/getMrna.do?gene=780&matureName=hsa-miR-10b*&organism=9606
hsa-miR-10b-3p	MIMAT0004556	hsa-miR-10b*	9648	GCC2	-0.4	http://www.microrna.org/microrna/getMrna.do?gene=9648&matureName=hsa-miR-10b*&organism=9606
hsa-miR-10b-3p	MIMAT0004556	hsa-miR-10b*	80129	C6orf97	-0.24	http://www.microrna.org/microrna/getMrna.do?gene=80129&matureName=hsa-miR-10b*&organism=9606
hsa-miR-10b-3p	MIMAT0004556	hsa-miR-10b*	65983	GRAMD3	-0.46	http://www.microrna.org/microrna/getMrna.do?gene=65983&matureName=hsa-miR-10b*&organism=9606
hsa-miR-10b-3p	MIMAT0004556	hsa-miR-10b*	10559	SLC35A1	-0.1	http://www.microrna.org/microrna/getMrna.do?gene=10559&matureName=hsa-miR-10b*&organism=9606
hsa-miR-10b-3p	MIMAT0004556	hsa-miR-10b*	5899	RALB	-0.45	http://www.microrna.org/microrna/getMrna.do?gene=5899&matureName=hsa-miR-10b*&organism=9606
hsa-miR-10b-3p	MIMAT0004556	hsa-miR-10b*	84981	C17orf91	-0.13	http://www.microrna.org/microrna/getMrna.do?gene=84981&matureName=hsa-miR-10b*&organism=9606
hsa-miR-10b-3p	MIMAT0004556	hsa-miR-10b*	401303	ZNF815	-0.31	http://www.microrna.org/microrna/getMrna.do?gene=401303&matureName=hsa-miR-10b*&organism=9606
hsa-miR-10b-3p	MIMAT0004556	hsa-miR-10b*	92949	ADAMTSL1	-0.46	http://www.microrna.org/microrna/getMrna.do?gene=92949&matureName=hsa-miR-10b*&organism=9606
hsa-miR-10b-3p	MIMAT0004556	hsa-miR-10b*	56123	PCDHB13	-0.64	http://www.microrna.org/microrna/getMrna.do?gene=56123&matureName=hsa-miR-10b*&organism=9606
hsa-miR-10b-3p	MIMAT0004556	hsa-miR-10b*	57460	PPM1H	-0.22	http://www.microrna.org/microrna/getMrna.do?gene=57460&matureName=hsa-miR-10b*&organism=9606
hsa-miR-10b-3p	MIMAT0004556	hsa-miR-10b*	54469	ZFAND6	-0.15	http://www.microrna.org/microrna/getMrna.do?gene=54469&matureName=hsa-miR-10b*&organism=9606
hsa-miR-10b-3p	MIMAT0004556	hsa-miR-10b*	222235	FBXL13	-0.17	http://www.microrna.org/microrna/getMrna.do?gene=222235&matureName=hsa-miR-10b*&organism=9606
hsa-miR-10b-3p	MIMAT0004556	hsa-miR-10b*	80824	DUSP16	-0.5	http://www.microrna.org/microrna/getMrna.do?gene=80824&matureName=hsa-miR-10b*&organism=9606
hsa-miR-10b-3p	MIMAT0004556	hsa-miR-10b*	6648	SOD2	-1.19	http://www.microrna.org/microrna/getMrna.do?gene=6648&matureName=hsa-miR-10b*&organism=9606
hsa-miR-10b-3p	MIMAT0004556	hsa-miR-10b*	201626	PDE12	-0.25	http://www.microrna.org/microrna/getMrna.do?gene=201626&matureName=hsa-miR-10b*&organism=9606
hsa-miR-10b-3p	MIMAT0004556	hsa-miR-10b*	9782	MATR3	-0.11	http://www.microrna.org/microrna/getMrna.do?gene=9782&matureName=hsa-miR-10b*&organism=9606
hsa-miR-10b-3p	MIMAT0004556	hsa-miR-10b*	54708	MARCH5	-0.77	http://www.microrna.org/microrna/getMrna.do?gene=54708&matureName=hsa-miR-10b*&organism=9606
hsa-miR-10b-3p	MIMAT0004556	hsa-miR-10b*	841	CASP8	-0.35	http://www.microrna.org/microrna/getMrna.do?gene=841&matureName=hsa-miR-10b*&organism=9606
hsa-miR-10b-3p	MIMAT0004556	hsa-miR-10b*	64924	SLC30A5	-0.99	http://www.microrna.org/microrna/getMrna.do?gene=64924&matureName=hsa-miR-10b*&organism=9606
hsa-miR-10b-3p	MIMAT0004556	hsa-miR-10b*	64924	SLC30A5	-0.88	http://www.microrna.org/microrna/getMrna.do?gene=64924&matureName=hsa-miR-10b*&organism=9606
hsa-miR-10b-3p	MIMAT0004556	hsa-miR-10b*	4478	MSN	-0.53	http://www.microrna.org/microrna/getMrna.do?gene=4478&matureName=hsa-miR-10b*&organism=9606
hsa-miR-10b-3p	MIMAT0004556	hsa-miR-10b*	1737	DLAT	-1.16	http://www.microrna.org/microrna/getMrna.do?gene=1737&matureName=hsa-miR-10b*&organism=9606
hsa-miR-10b-3p	MIMAT0004556	hsa-miR-10b*	1737	DLAT	-1.04	http://www.microrna.org/microrna/getMrna.do?gene=1737&matureName=hsa-miR-10b*&organism=9606
hsa-miR-10b-3p	MIMAT0004556	hsa-miR-10b*	3301	DNAJA1	-0.2	http://www.microrna.org/microrna/getMrna.do?gene=3301&matureName=hsa-miR-10b*&organism=9606
hsa-miR-10b-3p	MIMAT0004556	hsa-miR-10b*	91133	L3MBTL4	-0.4	http://www.microrna.org/microrna/getMrna.do?gene=91133&matureName=hsa-miR-10b*&organism=9606
hsa-miR-10b-3p	MIMAT0004556	hsa-miR-10b*	91133	L3MBTL4	-0.1	http://www.microrna.org/microrna/getMrna.do?gene=91133&matureName=hsa-miR-10b*&organism=9606
hsa-miR-10b-3p	MIMAT0004556	hsa-miR-10b*	5208	PFKFB2	-0.5	http://www.microrna.org/microrna/getMrna.do?gene=5208&matureName=hsa-miR-10b*&organism=9606
hsa-miR-10b-3p	MIMAT0004556	hsa-miR-10b*	4222	MEOX1	-0.13	http://www.microrna.org/microrna/getMrna.do?gene=4222&matureName=hsa-miR-10b*&organism=9606
hsa-miR-10b-3p	MIMAT0004556	hsa-miR-10b*	1200	TPP1	-0.16	http://www.microrna.org/microrna/getMrna.do?gene=1200&matureName=hsa-miR-10b*&organism=9606
hsa-miR-10b-3p	MIMAT0004556	hsa-miR-10b*	653129	PTPN20A	-0.12	http://www.microrna.org/microrna/getMrna.do?gene=653129&matureName=hsa-miR-10b*&organism=9606
hsa-miR-10b-3p	MIMAT0004556	hsa-miR-10b*	6638	SNRPN	-0.56	http://www.microrna.org/microrna/getMrna.do?gene=6638&matureName=hsa-miR-10b*&organism=9606
hsa-miR-10b-3p	MIMAT0004556	hsa-miR-10b*	3753	KCNE1	-0.14	http://www.microrna.org/microrna/getMrna.do?gene=3753&matureName=hsa-miR-10b*&organism=9606
hsa-miR-10b-3p	MIMAT0004556	hsa-miR-10b*	83930	STARD3NL	-0.15	http://www.microrna.org/microrna/getMrna.do?gene=83930&matureName=hsa-miR-10b*&organism=9606
hsa-miR-10b-3p	MIMAT0004556	hsa-miR-10b*	7753	ZNF202	-0.11	http://www.microrna.org/microrna/getMrna.do?gene=7753&matureName=hsa-miR-10b*&organism=9606
hsa-miR-10b-3p	MIMAT0004556	hsa-miR-10b*	11037	STON1	-0.38	http://www.microrna.org/microrna/getMrna.do?gene=11037&matureName=hsa-miR-10b*&organism=9606
hsa-miR-10b-3p	MIMAT0004556	hsa-miR-10b*	123036	TC2N	-0.89	http://www.microrna.org/microrna/getMrna.do?gene=123036&matureName=hsa-miR-10b*&organism=9606
hsa-miR-10b-3p	MIMAT0004556	hsa-miR-10b*	734	OSGIN2	-1.18	http://www.microrna.org/microrna/getMrna.do?gene=734&matureName=hsa-miR-10b*&organism=9606
hsa-miR-10b-3p	MIMAT0004556	hsa-miR-10b*	10542	HBXIP	-0.1	http://www.microrna.org/microrna/getMrna.do?gene=10542&matureName=hsa-miR-10b*&organism=9606
hsa-miR-10b-3p	MIMAT0004556	hsa-miR-10b*	22948	CCT5	-1.17	http://www.microrna.org/microrna/getMrna.do?gene=22948&matureName=hsa-miR-10b*&organism=9606
hsa-miR-10b-3p	MIMAT0004556	hsa-miR-10b*	22948	CCT5	-0.97	http://www.microrna.org/microrna/getMrna.do?gene=22948&matureName=hsa-miR-10b*&organism=9606
hsa-miR-10b-3p	MIMAT0004556	hsa-miR-10b*	55466	DNAJA4	-0.84	http://www.microrna.org/microrna/getMrna.do?gene=55466&matureName=hsa-miR-10b*&organism=9606
hsa-miR-10b-3p	MIMAT0004556	hsa-miR-10b*	353174	ZACN	-0.16	http://www.microrna.org/microrna/getMrna.do?gene=353174&matureName=hsa-miR-10b*&organism=9606
hsa-miR-10b-3p	MIMAT0004556	hsa-miR-10b*	353174	ZACN	-1.06	http://www.microrna.org/microrna/getMrna.do?gene=353174&matureName=hsa-miR-10b*&organism=9606
hsa-miR-10b-3p	MIMAT0004556	hsa-miR-10b*	9791	PTDSS1	-0.11	http://www.microrna.org/microrna/getMrna.do?gene=9791&matureName=hsa-miR-10b*&organism=9606
hsa-miR-10b-3p	MIMAT0004556	hsa-miR-10b*	91754	NEK9	-0.77	http://www.microrna.org/microrna/getMrna.do?gene=91754&matureName=hsa-miR-10b*&organism=9606
hsa-miR-10b-3p	MIMAT0004556	hsa-miR-10b*	3156	HMGCR	-0.18	http://www.microrna.org/microrna/getMrna.do?gene=3156&matureName=hsa-miR-10b*&organism=9606
hsa-miR-10b-3p	MIMAT0004556	hsa-miR-10b*	272	AMPD3	-0.15	http://www.microrna.org/microrna/getMrna.do?gene=272&matureName=hsa-miR-10b*&organism=9606
hsa-miR-10b-3p	MIMAT0004556	hsa-miR-10b*	139221	MUM1L1	-1.16	http://www.microrna.org/microrna/getMrna.do?gene=139221&matureName=hsa-miR-10b*&organism=9606
hsa-miR-10b-3p	MIMAT0004556	hsa-miR-10b*	5635	PRPSAP1	-0.29	http://www.microrna.org/microrna/getMrna.do?gene=5635&matureName=hsa-miR-10b*&organism=9606
hsa-miR-10b-3p	MIMAT0004556	hsa-miR-10b*	23366	KIAA0895	-0.22	http://www.microrna.org/microrna/getMrna.do?gene=23366&matureName=hsa-miR-10b*&organism=9606
hsa-miR-10b-3p	MIMAT0004556	hsa-miR-10b*	3683	ITGAL	-0.41	http://www.microrna.org/microrna/getMrna.do?gene=3683&matureName=hsa-miR-10b*&organism=9606
hsa-miR-10b-3p	MIMAT0004556	hsa-miR-10b*	5795	PTPRJ	-0.12	http://www.microrna.org/microrna/getMrna.do?gene=5795&matureName=hsa-miR-10b*&organism=9606
hsa-miR-10b-3p	MIMAT0004556	hsa-miR-10b*	5540	PPYR1	-0.41	http://www.microrna.org/microrna/getMrna.do?gene=5540&matureName=hsa-miR-10b*&organism=9606
hsa-miR-10b-3p	MIMAT0004556	hsa-miR-10b*	54822	TRPM7	-1.05	http://www.microrna.org/microrna/getMrna.do?gene=54822&matureName=hsa-miR-10b*&organism=9606
hsa-miR-10b-3p	MIMAT0004556	hsa-miR-10b*	153768	PRELID2	-0.24	http://www.microrna.org/microrna/getMrna.do?gene=153768&matureName=hsa-miR-10b*&organism=9606
hsa-miR-10b-3p	MIMAT0004556	hsa-miR-10b*	27185	DISC1	-0.47	http://www.microrna.org/microrna/getMrna.do?gene=27185&matureName=hsa-miR-10b*&organism=9606
hsa-miR-10b-3p	MIMAT0004556	hsa-miR-10b*	6892	TAPBP	-0.16	http://www.microrna.org/microrna/getMrna.do?gene=6892&matureName=hsa-miR-10b*&organism=9606
hsa-miR-10b-3p	MIMAT0004556	hsa-miR-10b*	8905	AP1S2	-0.46	http://www.microrna.org/microrna/getMrna.do?gene=8905&matureName=hsa-miR-10b*&organism=9606
hsa-miR-10b-3p	MIMAT0004556	hsa-miR-10b*	286	ANK1	-0.54	http://www.microrna.org/microrna/getMrna.do?gene=286&matureName=hsa-miR-10b*&organism=9606
hsa-miR-10b-3p	MIMAT0004556	hsa-miR-10b*	404785	POTEG	-0.5	http://www.microrna.org/microrna/getMrna.do?gene=404785&matureName=hsa-miR-10b*&organism=9606
hsa-miR-10b-3p	MIMAT0004556	hsa-miR-10b*	56986	DTWD1	-0.55	http://www.microrna.org/microrna/getMrna.do?gene=56986&matureName=hsa-miR-10b*&organism=9606
hsa-miR-10b-3p	MIMAT0004556	hsa-miR-10b*	57472	CNOT6	-0.87	http://www.microrna.org/microrna/getMrna.do?gene=57472&matureName=hsa-miR-10b*&organism=9606
hsa-miR-10b-3p	MIMAT0004556	hsa-miR-10b*	10059	DNM1L	-0.99	http://www.microrna.org/microrna/getMrna.do?gene=10059&matureName=hsa-miR-10b*&organism=9606
hsa-miR-10b-3p	MIMAT0004556	hsa-miR-10b*	441425	ANKRD20A3	-0.85	http://www.microrna.org/microrna/getMrna.do?gene=441425&matureName=hsa-miR-10b*&organism=9606
hsa-miR-10b-3p	MIMAT0004556	hsa-miR-10b*	441425	ANKRD20A3	-0.53	http://www.microrna.org/microrna/getMrna.do?gene=441425&matureName=hsa-miR-10b*&organism=9606
hsa-miR-10b-3p	MIMAT0004556	hsa-miR-10b*	441425	ANKRD20A3	-0.12	http://www.microrna.org/microrna/getMrna.do?gene=441425&matureName=hsa-miR-10b*&organism=9606
hsa-miR-10b-3p	MIMAT0004556	hsa-miR-10b*	9712	USP6NL	-0.11	http://www.microrna.org/microrna/getMrna.do?gene=9712&matureName=hsa-miR-10b*&organism=9606
hsa-miR-10b-3p	MIMAT0004556	hsa-miR-10b*	286133	SCARA5	-0.25	http://www.microrna.org/microrna/getMrna.do?gene=286133&matureName=hsa-miR-10b*&organism=9606
hsa-miR-10b-3p	MIMAT0004556	hsa-miR-10b*	23516	SLC39A14	-0.29	http://www.microrna.org/microrna/getMrna.do?gene=23516&matureName=hsa-miR-10b*&organism=9606
hsa-miR-10b-3p	MIMAT0004556	hsa-miR-10b*	401258	RAB44	-0.16	http://www.microrna.org/microrna/getMrna.do?gene=401258&matureName=hsa-miR-10b*&organism=9606
hsa-miR-10b-3p	MIMAT0004556	hsa-miR-10b*	4602	MYB	-0.38	http://www.microrna.org/microrna/getMrna.do?gene=4602&matureName=hsa-miR-10b*&organism=9606
hsa-miR-10b-3p	MIMAT0004556	hsa-miR-10b*	2313	FLI1	-0.1	http://www.microrna.org/microrna/getMrna.do?gene=2313&matureName=hsa-miR-10b*&organism=9606
hsa-miR-10b-3p	MIMAT0004556	hsa-miR-10b*	255231	MCOLN2	-0.47	http://www.microrna.org/microrna/getMrna.do?gene=255231&matureName=hsa-miR-10b*&organism=9606
hsa-miR-10b-3p	MIMAT0004556	hsa-miR-10b*	2012	EMP1	-0.35	http://www.microrna.org/microrna/getMrna.do?gene=2012&matureName=hsa-miR-10b*&organism=9606
hsa-miR-10b-3p	MIMAT0004556	hsa-miR-10b*	2012	EMP1	-0.18	http://www.microrna.org/microrna/getMrna.do?gene=2012&matureName=hsa-miR-10b*&organism=9606
hsa-miR-10b-3p	MIMAT0004556	hsa-miR-10b*	10059	DNM1L	-0.43	http://www.microrna.org/microrna/getMrna.do?gene=10059&matureName=hsa-miR-10b*&organism=9606
hsa-miR-10b-3p	MIMAT0004556	hsa-miR-10b*	10059	DNM1L	-0.63	http://www.microrna.org/microrna/getMrna.do?gene=10059&matureName=hsa-miR-10b*&organism=9606
hsa-miR-10b-3p	MIMAT0004556	hsa-miR-10b*	3231	HOXD1	-1.23	http://www.microrna.org/microrna/getMrna.do?gene=3231&matureName=hsa-miR-10b*&organism=9606
hsa-miR-10b-3p	MIMAT0004556	hsa-miR-10b*	3231	HOXD1	-1.16	http://www.microrna.org/microrna/getMrna.do?gene=3231&matureName=hsa-miR-10b*&organism=9606
hsa-miR-10b-3p	MIMAT0004556	hsa-miR-10b*	1416	CRYBB2P1	-0.73	http://www.microrna.org/microrna/getMrna.do?gene=1416&matureName=hsa-miR-10b*&organism=9606
hsa-miR-10b-3p	MIMAT0004556	hsa-miR-10b*	54962	TIPIN	-0.19	http://www.microrna.org/microrna/getMrna.do?gene=54962&matureName=hsa-miR-10b*&organism=9606
hsa-miR-10b-3p	MIMAT0004556	hsa-miR-10b*	100124692	LOC100124692	-0.26	http://www.microrna.org/microrna/getMrna.do?gene=100124692&matureName=hsa-miR-10b*&organism=9606
hsa-miR-10b-3p	MIMAT0004556	hsa-miR-10b*	744	MPPED2	-0.23	http://www.microrna.org/microrna/getMrna.do?gene=744&matureName=hsa-miR-10b*&organism=9606
hsa-miR-10b-3p	MIMAT0004556	hsa-miR-10b*	129530	LYG1	-0.77	http://www.microrna.org/microrna/getMrna.do?gene=129530&matureName=hsa-miR-10b*&organism=9606
hsa-miR-10b-3p	MIMAT0004556	hsa-miR-10b*	653129	PTPN20A	-0.15	http://www.microrna.org/microrna/getMrna.do?gene=653129&matureName=hsa-miR-10b*&organism=9606
hsa-miR-10b-3p	MIMAT0004556	hsa-miR-10b*	3804	KIR2DL3	-0.3	http://www.microrna.org/microrna/getMrna.do?gene=3804&matureName=hsa-miR-10b*&organism=9606
hsa-miR-10b-3p	MIMAT0004556	hsa-miR-10b*	1261	CNGA3	-0.23	http://www.microrna.org/microrna/getMrna.do?gene=1261&matureName=hsa-miR-10b*&organism=9606
hsa-miR-10b-3p	MIMAT0004556	hsa-miR-10b*	1261	CNGA3	-0.53	http://www.microrna.org/microrna/getMrna.do?gene=1261&matureName=hsa-miR-10b*&organism=9606
hsa-miR-10b-3p	MIMAT0004556	hsa-miR-10b*	1261	CNGA3	-0.17	http://www.microrna.org/microrna/getMrna.do?gene=1261&matureName=hsa-miR-10b*&organism=9606
hsa-miR-10b-3p	MIMAT0004556	hsa-miR-10b*	27316	RBMX	-0.1	http://www.microrna.org/microrna/getMrna.do?gene=27316&matureName=hsa-miR-10b*&organism=9606
hsa-miR-10b-3p	MIMAT0004556	hsa-miR-10b*	10013	HDAC6	-0.39	http://www.microrna.org/microrna/getMrna.do?gene=10013&matureName=hsa-miR-10b*&organism=9606
hsa-miR-10b-3p	MIMAT0004556	hsa-miR-10b*	10150	MBNL2	-0.51	http://www.microrna.org/microrna/getMrna.do?gene=10150&matureName=hsa-miR-10b*&organism=9606
hsa-miR-10b-3p	MIMAT0004556	hsa-miR-10b*	55086	CXorf57	-0.26	http://www.microrna.org/microrna/getMrna.do?gene=55086&matureName=hsa-miR-10b*&organism=9606
hsa-miR-10b-3p	MIMAT0004556	hsa-miR-10b*	55086	CXorf57	-0.14	http://www.microrna.org/microrna/getMrna.do?gene=55086&matureName=hsa-miR-10b*&organism=9606
hsa-miR-10b-3p	MIMAT0004556	hsa-miR-10b*	117154	DACH2	-0.1	http://www.microrna.org/microrna/getMrna.do?gene=117154&matureName=hsa-miR-10b*&organism=9606
hsa-miR-10b-3p	MIMAT0004556	hsa-miR-10b*	219699	UNC5B	-0.12	http://www.microrna.org/microrna/getMrna.do?gene=219699&matureName=hsa-miR-10b*&organism=9606
hsa-miR-10b-3p	MIMAT0004556	hsa-miR-10b*	9863	MAGI2	-1.15	http://www.microrna.org/microrna/getMrna.do?gene=9863&matureName=hsa-miR-10b*&organism=9606
hsa-miR-10b-3p	MIMAT0004556	hsa-miR-10b*	91862	MARVELD3	-0.26	http://www.microrna.org/microrna/getMrna.do?gene=91862&matureName=hsa-miR-10b*&organism=9606
hsa-miR-10b-3p	MIMAT0004556	hsa-miR-10b*	6744	SSFA2	-0.12	http://www.microrna.org/microrna/getMrna.do?gene=6744&matureName=hsa-miR-10b*&organism=9606
hsa-miR-10b-3p	MIMAT0004556	hsa-miR-10b*	5860	QDPR	-0.11	http://www.microrna.org/microrna/getMrna.do?gene=5860&matureName=hsa-miR-10b*&organism=9606
hsa-miR-10b-3p	MIMAT0004556	hsa-miR-10b*	23637	RABGAP1	-0.22	http://www.microrna.org/microrna/getMrna.do?gene=23637&matureName=hsa-miR-10b*&organism=9606
hsa-miR-10b-3p	MIMAT0004556	hsa-miR-10b*	25900	IFFO1	-0.66	http://www.microrna.org/microrna/getMrna.do?gene=25900&matureName=hsa-miR-10b*&organism=9606
hsa-miR-10b-3p	MIMAT0004556	hsa-miR-10b*	162967	ZNF320	-0.18	http://www.microrna.org/microrna/getMrna.do?gene=162967&matureName=hsa-miR-10b*&organism=9606
hsa-miR-10b-3p	MIMAT0004556	hsa-miR-10b*	8320	EOMES	-1.26	http://www.microrna.org/microrna/getMrna.do?gene=8320&matureName=hsa-miR-10b*&organism=9606
hsa-miR-10b-3p	MIMAT0004556	hsa-miR-10b*	257629	ANKS4B	-0.66	http://www.microrna.org/microrna/getMrna.do?gene=257629&matureName=hsa-miR-10b*&organism=9606
hsa-miR-10b-3p	MIMAT0004556	hsa-miR-10b*	57619	SHROOM3	-0.1	http://www.microrna.org/microrna/getMrna.do?gene=57619&matureName=hsa-miR-10b*&organism=9606
hsa-miR-10b-3p	MIMAT0004556	hsa-miR-10b*	3118	HLA-DQA2	-0.19	http://www.microrna.org/microrna/getMrna.do?gene=3118&matureName=hsa-miR-10b*&organism=9606
hsa-miR-10b-3p	MIMAT0004556	hsa-miR-10b*	2078	ERG	-0.12	http://www.microrna.org/microrna/getMrna.do?gene=2078&matureName=hsa-miR-10b*&organism=9606
hsa-miR-10b-3p	MIMAT0004556	hsa-miR-10b*	3796	KIF2A	-0.26	http://www.microrna.org/microrna/getMrna.do?gene=3796&matureName=hsa-miR-10b*&organism=9606
hsa-miR-10b-3p	MIMAT0004556	hsa-miR-10b*	6047	RNF4	-0.12	http://www.microrna.org/microrna/getMrna.do?gene=6047&matureName=hsa-miR-10b*&organism=9606
hsa-miR-10b-3p	MIMAT0004556	hsa-miR-10b*	440295	GOLGA6L9	-0.3	http://www.microrna.org/microrna/getMrna.do?gene=440295&matureName=hsa-miR-10b*&organism=9606
hsa-miR-10b-3p	MIMAT0004556	hsa-miR-10b*	54675	CRLS1	-0.13	http://www.microrna.org/microrna/getMrna.do?gene=54675&matureName=hsa-miR-10b*&organism=9606
hsa-miR-10b-3p	MIMAT0004556	hsa-miR-10b*	1478	CSTF2	-0.19	http://www.microrna.org/microrna/getMrna.do?gene=1478&matureName=hsa-miR-10b*&organism=9606
hsa-miR-10b-3p	MIMAT0004556	hsa-miR-10b*	2935	GSPT1	-0.49	http://www.microrna.org/microrna/getMrna.do?gene=2935&matureName=hsa-miR-10b*&organism=9606
hsa-miR-10b-3p	MIMAT0004556	hsa-miR-10b*	319089	C14orf25	-0.4	http://www.microrna.org/microrna/getMrna.do?gene=319089&matureName=hsa-miR-10b*&organism=9606
hsa-miR-10b-3p	MIMAT0004556	hsa-miR-10b*	127254	C1orf173	-0.12	http://www.microrna.org/microrna/getMrna.do?gene=127254&matureName=hsa-miR-10b*&organism=9606
hsa-miR-10b-3p	MIMAT0004556	hsa-miR-10b*	9529	BAG5	-0.6	http://www.microrna.org/microrna/getMrna.do?gene=9529&matureName=hsa-miR-10b*&organism=9606
hsa-miR-10b-3p	MIMAT0004556	hsa-miR-10b*	58477	SRPRB	-0.41	http://www.microrna.org/microrna/getMrna.do?gene=58477&matureName=hsa-miR-10b*&organism=9606
hsa-miR-10b-3p	MIMAT0004556	hsa-miR-10b*	10196	PRMT3	-0.45	http://www.microrna.org/microrna/getMrna.do?gene=10196&matureName=hsa-miR-10b*&organism=9606
hsa-miR-10b-3p	MIMAT0004556	hsa-miR-10b*	6812	STXBP1	-0.21	http://www.microrna.org/microrna/getMrna.do?gene=6812&matureName=hsa-miR-10b*&organism=9606
hsa-miR-10b-3p	MIMAT0004556	hsa-miR-10b*	10411	RAPGEF3	-0.18	http://www.microrna.org/microrna/getMrna.do?gene=10411&matureName=hsa-miR-10b*&organism=9606
hsa-miR-10b-3p	MIMAT0004556	hsa-miR-10b*	51015	ISOC1	-0.26	http://www.microrna.org/microrna/getMrna.do?gene=51015&matureName=hsa-miR-10b*&organism=9606
hsa-miR-10b-3p	MIMAT0004556	hsa-miR-10b*	55054	ATG16L1	-0.13	http://www.microrna.org/microrna/getMrna.do?gene=55054&matureName=hsa-miR-10b*&organism=9606
hsa-miR-10b-3p	MIMAT0004556	hsa-miR-10b*	254228	FAM26E	-0.18	http://www.microrna.org/microrna/getMrna.do?gene=254228&matureName=hsa-miR-10b*&organism=9606
hsa-miR-10b-3p	MIMAT0004556	hsa-miR-10b*	7201	TRHR	-0.99	http://www.microrna.org/microrna/getMrna.do?gene=7201&matureName=hsa-miR-10b*&organism=9606
hsa-miR-10b-3p	MIMAT0004556	hsa-miR-10b*	128344	C1orf88	-1.03	http://www.microrna.org/microrna/getMrna.do?gene=128344&matureName=hsa-miR-10b*&organism=9606
hsa-miR-10b-3p	MIMAT0004556	hsa-miR-10b*	9839	ZEB2	-0.2	http://www.microrna.org/microrna/getMrna.do?gene=9839&matureName=hsa-miR-10b*&organism=9606
hsa-miR-10b-3p	MIMAT0004556	hsa-miR-10b*	11099	PTPN21	-0.88	http://www.microrna.org/microrna/getMrna.do?gene=11099&matureName=hsa-miR-10b*&organism=9606
hsa-miR-10b-3p	MIMAT0004556	hsa-miR-10b*	3107	HLA-C	-1.31	http://www.microrna.org/microrna/getMrna.do?gene=3107&matureName=hsa-miR-10b*&organism=9606
hsa-miR-10b-3p	MIMAT0004556	hsa-miR-10b*	26271	FBXO5	-0.13	http://www.microrna.org/microrna/getMrna.do?gene=26271&matureName=hsa-miR-10b*&organism=9606
hsa-miR-10b-3p	MIMAT0004556	hsa-miR-10b*	51304	ZDHHC3	-0.12	http://www.microrna.org/microrna/getMrna.do?gene=51304&matureName=hsa-miR-10b*&organism=9606
hsa-miR-10b-3p	MIMAT0004556	hsa-miR-10b*	92736	OTOP2	-0.3	http://www.microrna.org/microrna/getMrna.do?gene=92736&matureName=hsa-miR-10b*&organism=9606
hsa-miR-10b-3p	MIMAT0004556	hsa-miR-10b*	5451	POU2F1	-0.1	http://www.microrna.org/microrna/getMrna.do?gene=5451&matureName=hsa-miR-10b*&organism=9606
hsa-miR-10b-3p	MIMAT0004556	hsa-miR-10b*	5567	PRKACB	-0.13	http://www.microrna.org/microrna/getMrna.do?gene=5567&matureName=hsa-miR-10b*&organism=9606
hsa-miR-10b-3p	MIMAT0004556	hsa-miR-10b*	6427	SFRS2	-0.15	http://www.microrna.org/microrna/getMrna.do?gene=6427&matureName=hsa-miR-10b*&organism=9606
hsa-miR-10b-3p	MIMAT0004556	hsa-miR-10b*	6427	SFRS2	-0.87	http://www.microrna.org/microrna/getMrna.do?gene=6427&matureName=hsa-miR-10b*&organism=9606
hsa-miR-10b-3p	MIMAT0004556	hsa-miR-10b*	9681	DEPDC5	-0.29	http://www.microrna.org/microrna/getMrna.do?gene=9681&matureName=hsa-miR-10b*&organism=9606
hsa-miR-10b-3p	MIMAT0004556	hsa-miR-10b*	85364	ZCCHC3	-0.18	http://www.microrna.org/microrna/getMrna.do?gene=85364&matureName=hsa-miR-10b*&organism=9606
hsa-miR-10b-3p	MIMAT0004556	hsa-miR-10b*	3787	KCNS1	-0.1	http://www.microrna.org/microrna/getMrna.do?gene=3787&matureName=hsa-miR-10b*&organism=9606
hsa-miR-10b-3p	MIMAT0004556	hsa-miR-10b*	3787	KCNS1	-0.79	http://www.microrna.org/microrna/getMrna.do?gene=3787&matureName=hsa-miR-10b*&organism=9606
hsa-miR-10b-3p	MIMAT0004556	hsa-miR-10b*	88455	ANKRD13A	-0.13	http://www.microrna.org/microrna/getMrna.do?gene=88455&matureName=hsa-miR-10b*&organism=9606
hsa-miR-10b-3p	MIMAT0004556	hsa-miR-10b*	23251	KIAA1024	-0.18	http://www.microrna.org/microrna/getMrna.do?gene=23251&matureName=hsa-miR-10b*&organism=9606
hsa-miR-10b-3p	MIMAT0004556	hsa-miR-10b*	90102	PHLDB2	-0.17	http://www.microrna.org/microrna/getMrna.do?gene=90102&matureName=hsa-miR-10b*&organism=9606
hsa-miR-10b-3p	MIMAT0004556	hsa-miR-10b*	26157	GIMAP2	-0.28	http://www.microrna.org/microrna/getMrna.do?gene=26157&matureName=hsa-miR-10b*&organism=9606
hsa-miR-10b-3p	MIMAT0004556	hsa-miR-10b*	26157	GIMAP2	-0.18	http://www.microrna.org/microrna/getMrna.do?gene=26157&matureName=hsa-miR-10b*&organism=9606
hsa-miR-10b-3p	MIMAT0004556	hsa-miR-10b*	400322	HERC2P2	-0.19	http://www.microrna.org/microrna/getMrna.do?gene=400322&matureName=hsa-miR-10b*&organism=9606
hsa-miR-10b-3p	MIMAT0004556	hsa-miR-10b*	9498	SLC4A8	-0.46	http://www.microrna.org/microrna/getMrna.do?gene=9498&matureName=hsa-miR-10b*&organism=9606
hsa-miR-10b-3p	MIMAT0004556	hsa-miR-10b*	6249	CLIP1	-0.11	http://www.microrna.org/microrna/getMrna.do?gene=6249&matureName=hsa-miR-10b*&organism=9606
hsa-miR-10b-3p	MIMAT0004556	hsa-miR-10b*	57614	KIAA1468	-1.27	http://www.microrna.org/microrna/getMrna.do?gene=57614&matureName=hsa-miR-10b*&organism=9606
hsa-miR-10b-3p	MIMAT0004556	hsa-miR-10b*	135644	TRIM40	-0.17	http://www.microrna.org/microrna/getMrna.do?gene=135644&matureName=hsa-miR-10b*&organism=9606
hsa-miR-10b-3p	MIMAT0004556	hsa-miR-10b*	22878	KIAA1012	-0.17	http://www.microrna.org/microrna/getMrna.do?gene=22878&matureName=hsa-miR-10b*&organism=9606
hsa-miR-10b-3p	MIMAT0004556	hsa-miR-10b*	54880	BCOR	-0.33	http://www.microrna.org/microrna/getMrna.do?gene=54880&matureName=hsa-miR-10b*&organism=9606
hsa-miR-10b-3p	MIMAT0004556	hsa-miR-10b*	55623	THUMPD1	-0.19	http://www.microrna.org/microrna/getMrna.do?gene=55623&matureName=hsa-miR-10b*&organism=9606
hsa-miR-10b-3p	MIMAT0004556	hsa-miR-10b*	158747	MOSPD2	-0.1	http://www.microrna.org/microrna/getMrna.do?gene=158747&matureName=hsa-miR-10b*&organism=9606
hsa-miR-10b-3p	MIMAT0004556	hsa-miR-10b*	5163	PDK1	-0.17	http://www.microrna.org/microrna/getMrna.do?gene=5163&matureName=hsa-miR-10b*&organism=9606
hsa-miR-10b-3p	MIMAT0004556	hsa-miR-10b*	80332	ADAM33	-0.21	http://www.microrna.org/microrna/getMrna.do?gene=80332&matureName=hsa-miR-10b*&organism=9606
hsa-miR-10b-3p	MIMAT0004556	hsa-miR-10b*	54790	TET2	-0.39	http://www.microrna.org/microrna/getMrna.do?gene=54790&matureName=hsa-miR-10b*&organism=9606
hsa-miR-10b-3p	MIMAT0004556	hsa-miR-10b*	29796	UQCR10	-0.6	http://www.microrna.org/microrna/getMrna.do?gene=29796&matureName=hsa-miR-10b*&organism=9606
hsa-miR-10b-3p	MIMAT0004556	hsa-miR-10b*	79966	SCD5	-0.53	http://www.microrna.org/microrna/getMrna.do?gene=79966&matureName=hsa-miR-10b*&organism=9606
hsa-miR-10b-3p	MIMAT0004556	hsa-miR-10b*	122830	NAA30	-0.19	http://www.microrna.org/microrna/getMrna.do?gene=122830&matureName=hsa-miR-10b*&organism=9606
hsa-miR-10b-3p	MIMAT0004556	hsa-miR-10b*	143684	FAM76B	-0.12	http://www.microrna.org/microrna/getMrna.do?gene=143684&matureName=hsa-miR-10b*&organism=9606
hsa-miR-10b-3p	MIMAT0004556	hsa-miR-10b*	202243	CCDC125	-0.15	http://www.microrna.org/microrna/getMrna.do?gene=202243&matureName=hsa-miR-10b*&organism=9606
hsa-miR-10b-3p	MIMAT0004556	hsa-miR-10b*	221016	CCDC7	-0.12	http://www.microrna.org/microrna/getMrna.do?gene=221016&matureName=hsa-miR-10b*&organism=9606
hsa-miR-10b-3p	MIMAT0004556	hsa-miR-10b*	54510	PCDH18	-0.32	http://www.microrna.org/microrna/getMrna.do?gene=54510&matureName=hsa-miR-10b*&organism=9606
hsa-miR-10b-3p	MIMAT0004556	hsa-miR-10b*	54510	PCDH18	-0.27	http://www.microrna.org/microrna/getMrna.do?gene=54510&matureName=hsa-miR-10b*&organism=9606
hsa-miR-10b-3p	MIMAT0004556	hsa-miR-10b*	22891	ZNF365	-0.13	http://www.microrna.org/microrna/getMrna.do?gene=22891&matureName=hsa-miR-10b*&organism=9606
hsa-miR-10b-3p	MIMAT0004556	hsa-miR-10b*	4605	MYBL2	-0.59	http://www.microrna.org/microrna/getMrna.do?gene=4605&matureName=hsa-miR-10b*&organism=9606
hsa-miR-10b-3p	MIMAT0004556	hsa-miR-10b*	6300	MAPK12	-0.22	http://www.microrna.org/microrna/getMrna.do?gene=6300&matureName=hsa-miR-10b*&organism=9606
hsa-miR-10b-3p	MIMAT0004556	hsa-miR-10b*	9830	TRIM14	-0.33	http://www.microrna.org/microrna/getMrna.do?gene=9830&matureName=hsa-miR-10b*&organism=9606
hsa-miR-10b-3p	MIMAT0004556	hsa-miR-10b*	81533	ITFG1	-0.15	http://www.microrna.org/microrna/getMrna.do?gene=81533&matureName=hsa-miR-10b*&organism=9606
hsa-miR-10b-3p	MIMAT0004556	hsa-miR-10b*	57678	GPAM	-0.11	http://www.microrna.org/microrna/getMrna.do?gene=57678&matureName=hsa-miR-10b*&organism=9606
hsa-miR-10b-3p	MIMAT0004556	hsa-miR-10b*	389524	GTF2IRD2B	-0.12	http://www.microrna.org/microrna/getMrna.do?gene=389524&matureName=hsa-miR-10b*&organism=9606
hsa-miR-10b-3p	MIMAT0004556	hsa-miR-10b*	79805	VASH2	-0.7	http://www.microrna.org/microrna/getMrna.do?gene=79805&matureName=hsa-miR-10b*&organism=9606
hsa-miR-10b-3p	MIMAT0004556	hsa-miR-10b*	26230	TIAM2	-1.15	http://www.microrna.org/microrna/getMrna.do?gene=26230&matureName=hsa-miR-10b*&organism=9606
hsa-miR-10b-3p	MIMAT0004556	hsa-miR-10b*	57511	COG6	-0.19	http://www.microrna.org/microrna/getMrna.do?gene=57511&matureName=hsa-miR-10b*&organism=9606
hsa-miR-10b-3p	MIMAT0004556	hsa-miR-10b*	55798	METTL2B	-0.86	http://www.microrna.org/microrna/getMrna.do?gene=55798&matureName=hsa-miR-10b*&organism=9606
hsa-miR-10b-3p	MIMAT0004556	hsa-miR-10b*	4481	MSR1	-0.16	http://www.microrna.org/microrna/getMrna.do?gene=4481&matureName=hsa-miR-10b*&organism=9606
hsa-miR-10b-3p	MIMAT0004556	hsa-miR-10b*	4481	MSR1	-0.75	http://www.microrna.org/microrna/getMrna.do?gene=4481&matureName=hsa-miR-10b*&organism=9606
hsa-miR-10b-3p	MIMAT0004556	hsa-miR-10b*	4481	MSR1	-0.62	http://www.microrna.org/microrna/getMrna.do?gene=4481&matureName=hsa-miR-10b*&organism=9606
hsa-miR-10b-3p	MIMAT0004556	hsa-miR-10b*	7812	CSDE1	-0.24	http://www.microrna.org/microrna/getMrna.do?gene=7812&matureName=hsa-miR-10b*&organism=9606
hsa-miR-10b-3p	MIMAT0004556	hsa-miR-10b*	7812	CSDE1	-0.25	http://www.microrna.org/microrna/getMrna.do?gene=7812&matureName=hsa-miR-10b*&organism=9606
hsa-miR-10b-3p	MIMAT0004556	hsa-miR-10b*	80867	HCG2P7	-0.21	http://www.microrna.org/microrna/getMrna.do?gene=80867&matureName=hsa-miR-10b*&organism=9606
hsa-miR-10b-3p	MIMAT0004556	hsa-miR-10b*	10492	SYNCRIP	-0.26	http://www.microrna.org/microrna/getMrna.do?gene=10492&matureName=hsa-miR-10b*&organism=9606
hsa-miR-10b-3p	MIMAT0004556	hsa-miR-10b*	3739	KCNA4	-1.3	http://www.microrna.org/microrna/getMrna.do?gene=3739&matureName=hsa-miR-10b*&organism=9606
hsa-miR-10b-3p	MIMAT0004556	hsa-miR-10b*	6563	SLC14A1	-0.28	http://www.microrna.org/microrna/getMrna.do?gene=6563&matureName=hsa-miR-10b*&organism=9606
hsa-miR-10b-3p	MIMAT0004556	hsa-miR-10b*	4008	LMO7	-0.49	http://www.microrna.org/microrna/getMrna.do?gene=4008&matureName=hsa-miR-10b*&organism=9606
hsa-miR-10b-3p	MIMAT0004556	hsa-miR-10b*	5202	PFDN2	-0.21	http://www.microrna.org/microrna/getMrna.do?gene=5202&matureName=hsa-miR-10b*&organism=9606
hsa-miR-10b-3p	MIMAT0004556	hsa-miR-10b*	8473	OGT	-0.17	http://www.microrna.org/microrna/getMrna.do?gene=8473&matureName=hsa-miR-10b*&organism=9606
hsa-miR-10b-3p	MIMAT0004556	hsa-miR-10b*	254251	LCORL	-0.79	http://www.microrna.org/microrna/getMrna.do?gene=254251&matureName=hsa-miR-10b*&organism=9606
hsa-miR-10b-3p	MIMAT0004556	hsa-miR-10b*	254251	LCORL	-0.42	http://www.microrna.org/microrna/getMrna.do?gene=254251&matureName=hsa-miR-10b*&organism=9606
hsa-miR-10b-3p	MIMAT0004556	hsa-miR-10b*	800	CALD1	-0.61	http://www.microrna.org/microrna/getMrna.do?gene=800&matureName=hsa-miR-10b*&organism=9606
hsa-miR-10b-3p	MIMAT0004556	hsa-miR-10b*	800	CALD1	-0.13	http://www.microrna.org/microrna/getMrna.do?gene=800&matureName=hsa-miR-10b*&organism=9606
hsa-miR-10b-3p	MIMAT0004556	hsa-miR-10b*	13	AADAC	-0.27	http://www.microrna.org/microrna/getMrna.do?gene=13&matureName=hsa-miR-10b*&organism=9606
hsa-miR-10b-3p	MIMAT0004556	hsa-miR-10b*	65266	WNK4	-0.97	http://www.microrna.org/microrna/getMrna.do?gene=65266&matureName=hsa-miR-10b*&organism=9606
hsa-miR-10b-3p	MIMAT0004556	hsa-miR-10b*	23012	STK38L	-0.6	http://www.microrna.org/microrna/getMrna.do?gene=23012&matureName=hsa-miR-10b*&organism=9606
hsa-miR-10b-3p	MIMAT0004556	hsa-miR-10b*	441493	LOC441493	-0.34	http://www.microrna.org/microrna/getMrna.do?gene=441493&matureName=hsa-miR-10b*&organism=9606
hsa-miR-10b-3p	MIMAT0004556	hsa-miR-10b*	30818	KCNIP3	-0.13	http://www.microrna.org/microrna/getMrna.do?gene=30818&matureName=hsa-miR-10b*&organism=9606
hsa-miR-10b-3p	MIMAT0004556	hsa-miR-10b*	344022	NOTO	-0.86	http://www.microrna.org/microrna/getMrna.do?gene=344022&matureName=hsa-miR-10b*&organism=9606
hsa-miR-10b-3p	MIMAT0004556	hsa-miR-10b*	129607	CMPK2	-0.11	http://www.microrna.org/microrna/getMrna.do?gene=129607&matureName=hsa-miR-10b*&organism=9606
hsa-miR-10b-3p	MIMAT0004556	hsa-miR-10b*	129607	CMPK2	-0.1	http://www.microrna.org/microrna/getMrna.do?gene=129607&matureName=hsa-miR-10b*&organism=9606
hsa-miR-10b-3p	MIMAT0004556	hsa-miR-10b*	80201	HKDC1	-0.39	http://www.microrna.org/microrna/getMrna.do?gene=80201&matureName=hsa-miR-10b*&organism=9606
hsa-miR-10b-3p	MIMAT0004556	hsa-miR-10b*	8754	ADAM9	-0.17	http://www.microrna.org/microrna/getMrna.do?gene=8754&matureName=hsa-miR-10b*&organism=9606
hsa-miR-10b-3p	MIMAT0004556	hsa-miR-10b*	4211	MEIS1	-0.46	http://www.microrna.org/microrna/getMrna.do?gene=4211&matureName=hsa-miR-10b*&organism=9606
hsa-miR-10b-3p	MIMAT0004556	hsa-miR-10b*	23532	PRAME	-1.23	http://www.microrna.org/microrna/getMrna.do?gene=23532&matureName=hsa-miR-10b*&organism=9606
hsa-miR-10b-3p	MIMAT0004556	hsa-miR-10b*	56658	TRIM39	-0.54	http://www.microrna.org/microrna/getMrna.do?gene=56658&matureName=hsa-miR-10b*&organism=9606
hsa-miR-10b-3p	MIMAT0004556	hsa-miR-10b*	10777	ARPP21	-0.91	http://www.microrna.org/microrna/getMrna.do?gene=10777&matureName=hsa-miR-10b*&organism=9606
hsa-miR-10b-3p	MIMAT0004556	hsa-miR-10b*	10613	ERLIN1	-0.79	http://www.microrna.org/microrna/getMrna.do?gene=10613&matureName=hsa-miR-10b*&organism=9606
hsa-miR-10b-3p	MIMAT0004556	hsa-miR-10b*	2585	GALK2	-0.17	http://www.microrna.org/microrna/getMrna.do?gene=2585&matureName=hsa-miR-10b*&organism=9606
hsa-miR-10b-3p	MIMAT0004556	hsa-miR-10b*	125150	ZSWIM7	-0.53	http://www.microrna.org/microrna/getMrna.do?gene=125150&matureName=hsa-miR-10b*&organism=9606
hsa-miR-10b-3p	MIMAT0004556	hsa-miR-10b*	2932	GSK3B	-0.67	http://www.microrna.org/microrna/getMrna.do?gene=2932&matureName=hsa-miR-10b*&organism=9606
hsa-miR-10b-3p	MIMAT0004556	hsa-miR-10b*	2932	GSK3B	-0.36	http://www.microrna.org/microrna/getMrna.do?gene=2932&matureName=hsa-miR-10b*&organism=9606
hsa-miR-10b-3p	MIMAT0004556	hsa-miR-10b*	58517	RBM25	-0.77	http://www.microrna.org/microrna/getMrna.do?gene=58517&matureName=hsa-miR-10b*&organism=9606
hsa-miR-10b-3p	MIMAT0004556	hsa-miR-10b*	27250	PDCD4	-0.12	http://www.microrna.org/microrna/getMrna.do?gene=27250&matureName=hsa-miR-10b*&organism=9606
hsa-miR-10b-3p	MIMAT0004556	hsa-miR-10b*	286204	CRB2	-0.14	http://www.microrna.org/microrna/getMrna.do?gene=286204&matureName=hsa-miR-10b*&organism=9606
hsa-miR-10b-3p	MIMAT0004556	hsa-miR-10b*	79804	NBLA00301	-0.21	http://www.microrna.org/microrna/getMrna.do?gene=79804&matureName=hsa-miR-10b*&organism=9606
hsa-miR-10b-3p	MIMAT0004556	hsa-miR-10b*	79804	NBLA00301	-0.14	http://www.microrna.org/microrna/getMrna.do?gene=79804&matureName=hsa-miR-10b*&organism=9606
hsa-miR-10b-3p	MIMAT0004556	hsa-miR-10b*	55258	THNSL2	-0.27	http://www.microrna.org/microrna/getMrna.do?gene=55258&matureName=hsa-miR-10b*&organism=9606
hsa-miR-10b-3p	MIMAT0004556	hsa-miR-10b*	10914	PAPOLA	-0.63	http://www.microrna.org/microrna/getMrna.do?gene=10914&matureName=hsa-miR-10b*&organism=9606
hsa-miR-10b-3p	MIMAT0004556	hsa-miR-10b*	10914	PAPOLA	-0.88	http://www.microrna.org/microrna/getMrna.do?gene=10914&matureName=hsa-miR-10b*&organism=9606
hsa-miR-10b-3p	MIMAT0004556	hsa-miR-10b*	55770	EXOC2	-0.82	http://www.microrna.org/microrna/getMrna.do?gene=55770&matureName=hsa-miR-10b*&organism=9606
hsa-miR-10b-3p	MIMAT0004556	hsa-miR-10b*	64745	METT11D1	-0.17	http://www.microrna.org/microrna/getMrna.do?gene=64745&matureName=hsa-miR-10b*&organism=9606
hsa-miR-10b-3p	MIMAT0004556	hsa-miR-10b*	6398	SECTM1	-0.1	http://www.microrna.org/microrna/getMrna.do?gene=6398&matureName=hsa-miR-10b*&organism=9606
hsa-miR-10b-3p	MIMAT0004556	hsa-miR-10b*	352961	HCG26	-0.23	http://www.microrna.org/microrna/getMrna.do?gene=352961&matureName=hsa-miR-10b*&organism=9606
hsa-miR-10b-3p	MIMAT0004556	hsa-miR-10b*	339184	CCDC144NL	-0.14	http://www.microrna.org/microrna/getMrna.do?gene=339184&matureName=hsa-miR-10b*&organism=9606
hsa-miR-10b-3p	MIMAT0004556	hsa-miR-10b*	60401	EDA2R	-0.5	http://www.microrna.org/microrna/getMrna.do?gene=60401&matureName=hsa-miR-10b*&organism=9606
hsa-miR-10b-3p	MIMAT0004556	hsa-miR-10b*	22828	RBM16	-0.34	http://www.microrna.org/microrna/getMrna.do?gene=22828&matureName=hsa-miR-10b*&organism=9606
hsa-miR-10b-3p	MIMAT0004556	hsa-miR-10b*	23768	FLRT2	-0.1	http://www.microrna.org/microrna/getMrna.do?gene=23768&matureName=hsa-miR-10b*&organism=9606
hsa-miR-10b-3p	MIMAT0004556	hsa-miR-10b*	27257	LSM1	-0.45	http://www.microrna.org/microrna/getMrna.do?gene=27257&matureName=hsa-miR-10b*&organism=9606
hsa-miR-10b-3p	MIMAT0004556	hsa-miR-10b*	6416	MAP2K4	-0.34	http://www.microrna.org/microrna/getMrna.do?gene=6416&matureName=hsa-miR-10b*&organism=9606
hsa-miR-10b-3p	MIMAT0004556	hsa-miR-10b*	79776	ZFHX4	-0.2	http://www.microrna.org/microrna/getMrna.do?gene=79776&matureName=hsa-miR-10b*&organism=9606
hsa-miR-10b-3p	MIMAT0004556	hsa-miR-10b*	23396	PIP5K1C	-0.18	http://www.microrna.org/microrna/getMrna.do?gene=23396&matureName=hsa-miR-10b*&organism=9606
hsa-miR-10b-3p	MIMAT0004556	hsa-miR-10b*	8301	PICALM	-1.22	http://www.microrna.org/microrna/getMrna.do?gene=8301&matureName=hsa-miR-10b*&organism=9606
hsa-miR-10b-3p	MIMAT0004556	hsa-miR-10b*	51054	PLEKHA9	-1.22	http://www.microrna.org/microrna/getMrna.do?gene=51054&matureName=hsa-miR-10b*&organism=9606
hsa-miR-10b-3p	MIMAT0004556	hsa-miR-10b*	2857	GPR34	-0.17	http://www.microrna.org/microrna/getMrna.do?gene=2857&matureName=hsa-miR-10b*&organism=9606
hsa-miR-10b-3p	MIMAT0004556	hsa-miR-10b*	4883	NPR3	-0.1	http://www.microrna.org/microrna/getMrna.do?gene=4883&matureName=hsa-miR-10b*&organism=9606
hsa-miR-10b-3p	MIMAT0004556	hsa-miR-10b*	23196	FAM120A	-0.13	http://www.microrna.org/microrna/getMrna.do?gene=23196&matureName=hsa-miR-10b*&organism=9606
hsa-miR-10b-3p	MIMAT0004556	hsa-miR-10b*	29951	PDZRN4	-0.19	http://www.microrna.org/microrna/getMrna.do?gene=29951&matureName=hsa-miR-10b*&organism=9606
hsa-miR-10b-3p	MIMAT0004556	hsa-miR-10b*	400955	FLJ30838	-0.12	http://www.microrna.org/microrna/getMrna.do?gene=400955&matureName=hsa-miR-10b*&organism=9606
hsa-miR-10b-3p	MIMAT0004556	hsa-miR-10b*	6015	RING1	-0.98	http://www.microrna.org/microrna/getMrna.do?gene=6015&matureName=hsa-miR-10b*&organism=9606
hsa-miR-10b-3p	MIMAT0004556	hsa-miR-10b*	1193	CLIC2	-0.77	http://www.microrna.org/microrna/getMrna.do?gene=1193&matureName=hsa-miR-10b*&organism=9606
hsa-miR-10b-3p	MIMAT0004556	hsa-miR-10b*	5369	PMCHL1	-0.43	http://www.microrna.org/microrna/getMrna.do?gene=5369&matureName=hsa-miR-10b*&organism=9606
hsa-miR-10b-3p	MIMAT0004556	hsa-miR-10b*	3575	IL7R	-0.79	http://www.microrna.org/microrna/getMrna.do?gene=3575&matureName=hsa-miR-10b*&organism=9606
hsa-miR-10b-3p	MIMAT0004556	hsa-miR-10b*	3575	IL7R	-0.55	http://www.microrna.org/microrna/getMrna.do?gene=3575&matureName=hsa-miR-10b*&organism=9606
hsa-miR-10b-3p	MIMAT0004556	hsa-miR-10b*	5475	PPEF1	-0.58	http://www.microrna.org/microrna/getMrna.do?gene=5475&matureName=hsa-miR-10b*&organism=9606
hsa-miR-10b-3p	MIMAT0004556	hsa-miR-10b*	65065	NBEAL1	-0.16	http://www.microrna.org/microrna/getMrna.do?gene=65065&matureName=hsa-miR-10b*&organism=9606
hsa-miR-10b-3p	MIMAT0004556	hsa-miR-10b*	169355	IDO2	-0.16	http://www.microrna.org/microrna/getMrna.do?gene=169355&matureName=hsa-miR-10b*&organism=9606
hsa-miR-10b-3p	MIMAT0004556	hsa-miR-10b*	4330	MN1	-0.16	http://www.microrna.org/microrna/getMrna.do?gene=4330&matureName=hsa-miR-10b*&organism=9606
hsa-miR-10b-3p	MIMAT0004556	hsa-miR-10b*	3556	IL1RAP	-0.27	http://www.microrna.org/microrna/getMrna.do?gene=3556&matureName=hsa-miR-10b*&organism=9606
hsa-miR-10b-3p	MIMAT0004556	hsa-miR-10b*	5582	PRKCG	-0.83	http://www.microrna.org/microrna/getMrna.do?gene=5582&matureName=hsa-miR-10b*&organism=9606
hsa-miR-10b-3p	MIMAT0004556	hsa-miR-10b*	55660	PRPF40A	-0.33	http://www.microrna.org/microrna/getMrna.do?gene=55660&matureName=hsa-miR-10b*&organism=9606
hsa-miR-10b-3p	MIMAT0004556	hsa-miR-10b*	55337	C19orf66	-0.13	http://www.microrna.org/microrna/getMrna.do?gene=55337&matureName=hsa-miR-10b*&organism=9606
hsa-miR-10b-3p	MIMAT0004556	hsa-miR-10b*	717	C2	-0.23	http://www.microrna.org/microrna/getMrna.do?gene=717&matureName=hsa-miR-10b*&organism=9606
hsa-miR-10b-3p	MIMAT0004556	hsa-miR-10b*	145978	NCRNA00052	-0.27	http://www.microrna.org/microrna/getMrna.do?gene=145978&matureName=hsa-miR-10b*&organism=9606
hsa-miR-10b-3p	MIMAT0004556	hsa-miR-10b*	55686	MREG	-0.59	http://www.microrna.org/microrna/getMrna.do?gene=55686&matureName=hsa-miR-10b*&organism=9606
hsa-miR-10b-3p	MIMAT0004556	hsa-miR-10b*	28981	IFT81	-0.1	http://www.microrna.org/microrna/getMrna.do?gene=28981&matureName=hsa-miR-10b*&organism=9606
hsa-miR-10b-3p	MIMAT0004556	hsa-miR-10b*	11326	VSIG4	-0.64	http://www.microrna.org/microrna/getMrna.do?gene=11326&matureName=hsa-miR-10b*&organism=9606
hsa-miR-10b-3p	MIMAT0004556	hsa-miR-10b*	55691	FRMD4A	-0.12	http://www.microrna.org/microrna/getMrna.do?gene=55691&matureName=hsa-miR-10b*&organism=9606
hsa-miR-10b-3p	MIMAT0004556	hsa-miR-10b*	6015	RING1	-0.98	http://www.microrna.org/microrna/getMrna.do?gene=6015&matureName=hsa-miR-10b*&organism=9606
hsa-miR-10b-3p	MIMAT0004556	hsa-miR-10b*	3082	HGF	-0.15	http://www.microrna.org/microrna/getMrna.do?gene=3082&matureName=hsa-miR-10b*&organism=9606
hsa-miR-10b-3p	MIMAT0004556	hsa-miR-10b*	57586	SYT13	-0.14	http://www.microrna.org/microrna/getMrna.do?gene=57586&matureName=hsa-miR-10b*&organism=9606
hsa-miR-10b-3p	MIMAT0004556	hsa-miR-10b*	1618	DAZL	-0.9	http://www.microrna.org/microrna/getMrna.do?gene=1618&matureName=hsa-miR-10b*&organism=9606
hsa-miR-10b-3p	MIMAT0004556	hsa-miR-10b*	3137	HLA-J	-1.31	http://www.microrna.org/microrna/getMrna.do?gene=3137&matureName=hsa-miR-10b*&organism=9606
hsa-miR-10b-3p	MIMAT0004556	hsa-miR-10b*	540	ATP7B	-0.12	http://www.microrna.org/microrna/getMrna.do?gene=540&matureName=hsa-miR-10b*&organism=9606
hsa-miR-10b-3p	MIMAT0004556	hsa-miR-10b*	138009	DCAF4L2	-0.36	http://www.microrna.org/microrna/getMrna.do?gene=138009&matureName=hsa-miR-10b*&organism=9606
hsa-miR-10b-3p	MIMAT0004556	hsa-miR-10b*	79582	SPAG16	-0.2	http://www.microrna.org/microrna/getMrna.do?gene=79582&matureName=hsa-miR-10b*&organism=9606
hsa-miR-10b-3p	MIMAT0004556	hsa-miR-10b*	84665	MYPN	-0.51	http://www.microrna.org/microrna/getMrna.do?gene=84665&matureName=hsa-miR-10b*&organism=9606
hsa-miR-10b-3p	MIMAT0004556	hsa-miR-10b*	9093	DNAJA3	-0.22	http://www.microrna.org/microrna/getMrna.do?gene=9093&matureName=hsa-miR-10b*&organism=9606
hsa-miR-10b-3p	MIMAT0004556	hsa-miR-10b*	145581	LRFN5	-0.53	http://www.microrna.org/microrna/getMrna.do?gene=145581&matureName=hsa-miR-10b*&organism=9606
hsa-miR-10b-3p	MIMAT0004556	hsa-miR-10b*	57167	SALL4	-0.48	http://www.microrna.org/microrna/getMrna.do?gene=57167&matureName=hsa-miR-10b*&organism=9606
hsa-miR-10b-3p	MIMAT0004556	hsa-miR-10b*	56940	DUSP22	-0.1	http://www.microrna.org/microrna/getMrna.do?gene=56940&matureName=hsa-miR-10b*&organism=9606
hsa-miR-10b-3p	MIMAT0004556	hsa-miR-10b*	9860	LRIG2	-0.11	http://www.microrna.org/microrna/getMrna.do?gene=9860&matureName=hsa-miR-10b*&organism=9606
hsa-miR-10b-3p	MIMAT0004556	hsa-miR-10b*	154661	RUNDC3B	-0.58	http://www.microrna.org/microrna/getMrna.do?gene=154661&matureName=hsa-miR-10b*&organism=9606
hsa-miR-10b-3p	MIMAT0004556	hsa-miR-10b*	154661	RUNDC3B	-0.91	http://www.microrna.org/microrna/getMrna.do?gene=154661&matureName=hsa-miR-10b*&organism=9606
hsa-miR-10b-3p	MIMAT0004556	hsa-miR-10b*	23035	PHLPP2	-0.21	http://www.microrna.org/microrna/getMrna.do?gene=23035&matureName=hsa-miR-10b*&organism=9606
hsa-miR-10b-3p	MIMAT0004556	hsa-miR-10b*	23035	PHLPP2	-0.4	http://www.microrna.org/microrna/getMrna.do?gene=23035&matureName=hsa-miR-10b*&organism=9606
hsa-miR-10b-3p	MIMAT0004556	hsa-miR-10b*	210	ALAD	-0.18	http://www.microrna.org/microrna/getMrna.do?gene=210&matureName=hsa-miR-10b*&organism=9606
hsa-miR-10b-3p	MIMAT0004556	hsa-miR-10b*	100129935	LOC100129935	-0.2	http://www.microrna.org/microrna/getMrna.do?gene=100129935&matureName=hsa-miR-10b*&organism=9606
hsa-miR-10b-3p	MIMAT0004556	hsa-miR-10b*	6782	HSPA13	-0.12	http://www.microrna.org/microrna/getMrna.do?gene=6782&matureName=hsa-miR-10b*&organism=9606
hsa-miR-10b-3p	MIMAT0004556	hsa-miR-10b*	1445	CSK	-0.13	http://www.microrna.org/microrna/getMrna.do?gene=1445&matureName=hsa-miR-10b*&organism=9606
hsa-miR-10b-3p	MIMAT0004556	hsa-miR-10b*	85316	BAGE5	-0.65	http://www.microrna.org/microrna/getMrna.do?gene=85316&matureName=hsa-miR-10b*&organism=9606
hsa-miR-10b-3p	MIMAT0004556	hsa-miR-10b*	284802	FRG1B	-0.66	http://www.microrna.org/microrna/getMrna.do?gene=284802&matureName=hsa-miR-10b*&organism=9606
hsa-miR-10b-3p	MIMAT0004556	hsa-miR-10b*	375748	C9orf102	-0.28	http://www.microrna.org/microrna/getMrna.do?gene=375748&matureName=hsa-miR-10b*&organism=9606
hsa-miR-10b-3p	MIMAT0004556	hsa-miR-10b*	411	ARSB	-0.1	http://www.microrna.org/microrna/getMrna.do?gene=411&matureName=hsa-miR-10b*&organism=9606
hsa-miR-10b-3p	MIMAT0004556	hsa-miR-10b*	23078	KIAA0564	-0.19	http://www.microrna.org/microrna/getMrna.do?gene=23078&matureName=hsa-miR-10b*&organism=9606
hsa-miR-10b-3p	MIMAT0004556	hsa-miR-10b*	9833	MELK	-0.29	http://www.microrna.org/microrna/getMrna.do?gene=9833&matureName=hsa-miR-10b*&organism=9606
hsa-miR-10b-3p	MIMAT0004556	hsa-miR-10b*	55327	LIN7C	-0.19	http://www.microrna.org/microrna/getMrna.do?gene=55327&matureName=hsa-miR-10b*&organism=9606
hsa-miR-10b-3p	MIMAT0004556	hsa-miR-10b*	203859	ANO5	-0.22	http://www.microrna.org/microrna/getMrna.do?gene=203859&matureName=hsa-miR-10b*&organism=9606
hsa-miR-10b-3p	MIMAT0004556	hsa-miR-10b*	63916	ELMO2	-0.82	http://www.microrna.org/microrna/getMrna.do?gene=63916&matureName=hsa-miR-10b*&organism=9606
hsa-miR-10b-3p	MIMAT0004556	hsa-miR-10b*	1130	LYST	-0.39	http://www.microrna.org/microrna/getMrna.do?gene=1130&matureName=hsa-miR-10b*&organism=9606
hsa-miR-10b-3p	MIMAT0004556	hsa-miR-10b*	29960	FTSJ2	-0.26	http://www.microrna.org/microrna/getMrna.do?gene=29960&matureName=hsa-miR-10b*&organism=9606
hsa-miR-10b-3p	MIMAT0004556	hsa-miR-10b*	11196	SEC23IP	-0.57	http://www.microrna.org/microrna/getMrna.do?gene=11196&matureName=hsa-miR-10b*&organism=9606
hsa-miR-10b-3p	MIMAT0004556	hsa-miR-10b*	11196	SEC23IP	-0.63	http://www.microrna.org/microrna/getMrna.do?gene=11196&matureName=hsa-miR-10b*&organism=9606
hsa-miR-10b-3p	MIMAT0004556	hsa-miR-10b*	57684	ZBTB26	-1.05	http://www.microrna.org/microrna/getMrna.do?gene=57684&matureName=hsa-miR-10b*&organism=9606
hsa-miR-10b-3p	MIMAT0004556	hsa-miR-10b*	6427	SFRS2	-0.26	http://www.microrna.org/microrna/getMrna.do?gene=6427&matureName=hsa-miR-10b*&organism=9606
hsa-miR-10b-3p	MIMAT0004556	hsa-miR-10b*	6427	SFRS2	-1.06	http://www.microrna.org/microrna/getMrna.do?gene=6427&matureName=hsa-miR-10b*&organism=9606
[truncated: 218,933+ more rows]

## Sheet: microcosm
mirbase19	matuacc	SEQ	SCORE	PVALUE	TRANSCRIPT_ID	EXTERNAL_NAME	target detailed view
hsa-miR-10b-3p	MIMAT0004556	hsa-miR-10b*	17.55	0.00055893	ENST00000272521	TMEM177	http://www.ebi.ac.uk/enright-srv/microcosm/cgi-bin/targets/v5/detail_view.pl?transcript_id=ENST00000272521
hsa-miR-10b-3p	MIMAT0004556	hsa-miR-10b*	16.42	0.00055893	ENST00000272521	TMEM177	http://www.ebi.ac.uk/enright-srv/microcosm/cgi-bin/targets/v5/detail_view.pl?transcript_id=ENST00000272521
hsa-miR-105-3p	MIMAT0004516	hsa-miR-105*	15.97	0.03	ENST00000272521	TMEM177	http://www.ebi.ac.uk/enright-srv/microcosm/cgi-bin/targets/v5/detail_view.pl?transcript_id=ENST00000272521
hsa-miR-105-3p	MIMAT0004516	hsa-miR-105*	15.78	0.03	ENST00000327407	IL1F8	http://www.ebi.ac.uk/enright-srv/microcosm/cgi-bin/targets/v5/detail_view.pl?transcript_id=ENST00000327407
hsa-miR-10b-3p	MIMAT0004556	hsa-miR-10b*	17.28	0.01	ENST00000302759	BUB1	http://www.ebi.ac.uk/enright-srv/microcosm/cgi-bin/targets/v5/detail_view.pl?transcript_id=ENST00000302759
hsa-miR-105-3p	MIMAT0004516	hsa-miR-105*	15.8	0.03	ENST00000258449	TGFBRAP1	http://www.ebi.ac.uk/enright-srv/microcosm/cgi-bin/targets/v5/detail_view.pl?transcript_id=ENST00000258449
hsa-miR-10b-3p	MIMAT0004556	hsa-miR-10b*	16.04	0.04	ENST00000258456	GPR45	http://www.ebi.ac.uk/enright-srv/microcosm/cgi-bin/targets/v5/detail_view.pl?transcript_id=ENST00000258456
hsa-miR-105-3p	MIMAT0004516	hsa-miR-105*	16.14	0.02	ENST00000233954	IL1RL1	http://www.ebi.ac.uk/enright-srv/microcosm/cgi-bin/targets/v5/detail_view.pl?transcript_id=ENST00000233954
hsa-miR-10b-3p	MIMAT0004556	hsa-miR-10b*	16.82	0.00066382	ENST00000308528	LYG1_HUMAN	http://www.ebi.ac.uk/enright-srv/microcosm/cgi-bin/targets/v5/detail_view.pl?transcript_id=ENST00000308528
hsa-miR-105-3p	MIMAT0004516	hsa-miR-105*	16.04	0.02	ENST00000338148	MRPL30	http://www.ebi.ac.uk/enright-srv/microcosm/cgi-bin/targets/v5/detail_view.pl?transcript_id=ENST00000338148
hsa-miR-10b-3p	MIMAT0004556	hsa-miR-10b*	16.02	0.00357	ENST00000264968	MGAT4A	http://www.ebi.ac.uk/enright-srv/microcosm/cgi-bin/targets/v5/detail_view.pl?transcript_id=ENST00000264968
hsa-miR-10b-3p	MIMAT0004556	hsa-miR-10b*	15.46	0.00357	ENST00000264968	MGAT4A	http://www.ebi.ac.uk/enright-srv/microcosm/cgi-bin/targets/v5/detail_view.pl?transcript_id=ENST00000264968
hsa-miR-10b-3p	MIMAT0004556	hsa-miR-10b*	18.17	0.0058623	ENST00000376941	CNGA3	http://www.ebi.ac.uk/enright-srv/microcosm/cgi-bin/targets/v5/detail_view.pl?transcript_id=ENST00000376941
hsa-miR-10b-3p	MIMAT0004556	hsa-miR-10b*	16.05	0.04	ENST00000272602	CNGA3	http://www.ebi.ac.uk/enright-srv/microcosm/cgi-bin/targets/v5/detail_view.pl?transcript_id=ENST00000272602
hsa-miR-10b-3p	MIMAT0004556	hsa-miR-10b*	16.32	0.03	ENST00000389517	ZAP70	http://www.ebi.ac.uk/enright-srv/microcosm/cgi-bin/targets/v5/detail_view.pl?transcript_id=ENST00000389517
hsa-miR-10b-3p	MIMAT0004556	hsa-miR-10b*	15.95	0.00305	ENST00000310865	NM_001080535.1	http://www.ebi.ac.uk/enright-srv/microcosm/cgi-bin/targets/v5/detail_view.pl?transcript_id=ENST00000310865
hsa-miR-10b-3p	MIMAT0004556	hsa-miR-10b*	15.54	0.00305	ENST00000310865	NM_001080535.1	http://www.ebi.ac.uk/enright-srv/microcosm/cgi-bin/targets/v5/detail_view.pl?transcript_id=ENST00000310865
hsa-miR-10b-3p	MIMAT0004556	hsa-miR-10b*	16.03	0.04	ENST00000283646	RPIA	http://www.ebi.ac.uk/enright-srv/microcosm/cgi-bin/targets/v5/detail_view.pl?transcript_id=ENST00000283646
hsa-miR-105-3p	MIMAT0004516	hsa-miR-105*	16.48	0.01	ENST00000355009	SH2D6	http://www.ebi.ac.uk/enright-srv/microcosm/cgi-bin/targets/v5/detail_view.pl?transcript_id=ENST00000355009
hsa-miR-10b-3p	MIMAT0004556	hsa-miR-10b*	16.78	0.0026823	ENST00000319855	KCMF1	http://www.ebi.ac.uk/enright-srv/microcosm/cgi-bin/targets/v5/detail_view.pl?transcript_id=ENST00000319855
hsa-miR-10b-3p	MIMAT0004556	hsa-miR-10b*	16.9	0.02	ENST00000389394	Q9H030_HUMAN	http://www.ebi.ac.uk/enright-srv/microcosm/cgi-bin/targets/v5/detail_view.pl?transcript_id=ENST00000389394
hsa-miR-105-3p	MIMAT0004516	hsa-miR-105*	16.06	0.02	ENST00000331369	NP_001013670.3	http://www.ebi.ac.uk/enright-srv/microcosm/cgi-bin/targets/v5/detail_view.pl?transcript_id=ENST00000331369
hsa-miR-10b-3p	MIMAT0004556	hsa-miR-10b*	16.94	0.02	ENST00000358788	MRPL19	http://www.ebi.ac.uk/enright-srv/microcosm/cgi-bin/targets/v5/detail_view.pl?transcript_id=ENST00000358788
hsa-miR-10b-3p	MIMAT0004556	hsa-miR-10b*	16.37	0.03	ENST00000233615	WBP1	http://www.ebi.ac.uk/enright-srv/microcosm/cgi-bin/targets/v5/detail_view.pl?transcript_id=ENST00000233615
hsa-miR-10b-3p	MIMAT0004556	hsa-miR-10b*	16.49	0.03	ENST00000272430	RTKN	http://www.ebi.ac.uk/enright-srv/microcosm/cgi-bin/targets/v5/detail_view.pl?transcript_id=ENST00000272430
hsa-miR-10b-3p	MIMAT0004556	hsa-miR-10b*	16.6	0.02	ENST00000244217	MCEE	http://www.ebi.ac.uk/enright-srv/microcosm/cgi-bin/targets/v5/detail_view.pl?transcript_id=ENST00000244217
hsa-miR-105-3p	MIMAT0004516	hsa-miR-105*	15.86	0.03	ENST00000361415	null	http://www.ebi.ac.uk/enright-srv/microcosm/cgi-bin/targets/v5/detail_view.pl?transcript_id=ENST00000361415
hsa-miR-10b-3p	MIMAT0004556	hsa-miR-10b*	16.44	0.03	ENST00000357308	GFPT1	http://www.ebi.ac.uk/enright-srv/microcosm/cgi-bin/targets/v5/detail_view.pl?transcript_id=ENST00000357308
hsa-miR-105-3p	MIMAT0004516	hsa-miR-105*	16	0.03	ENST00000303786	PROKR1	http://www.ebi.ac.uk/enright-srv/microcosm/cgi-bin/targets/v5/detail_view.pl?transcript_id=ENST00000303786
hsa-miR-105-3p	MIMAT0004516	hsa-miR-105*	15.99	0.03	ENST00000356458	Q6ZMW3_HUMAN	http://www.ebi.ac.uk/enright-srv/microcosm/cgi-bin/targets/v5/detail_view.pl?transcript_id=ENST00000356458
hsa-miR-105-3p	MIMAT0004516	hsa-miR-105*	16.32	0.02	ENST00000317802	TSPYL6	http://www.ebi.ac.uk/enright-srv/microcosm/cgi-bin/targets/v5/detail_view.pl?transcript_id=ENST00000317802
hsa-miR-10b-3p	MIMAT0004556	hsa-miR-10b*	17.6	0.0024669	ENST00000309835	STON1	http://www.ebi.ac.uk/enright-srv/microcosm/cgi-bin/targets/v5/detail_view.pl?transcript_id=ENST00000309835
hsa-miR-10b-3p	MIMAT0004556	hsa-miR-10b*	15.92	0.01	ENST00000378494	C2orf34	http://www.ebi.ac.uk/enright-srv/microcosm/cgi-bin/targets/v5/detail_view.pl?transcript_id=ENST00000378494
hsa-miR-105-3p	MIMAT0004516	hsa-miR-105*	17.75	0.0043261	ENST00000272286	ABCG8	http://www.ebi.ac.uk/enright-srv/microcosm/cgi-bin/targets/v5/detail_view.pl?transcript_id=ENST00000272286
hsa-miR-105-3p	MIMAT0004516	hsa-miR-105*	17.75	0.0043429	ENST00000378579	ABCG8	http://www.ebi.ac.uk/enright-srv/microcosm/cgi-bin/targets/v5/detail_view.pl?transcript_id=ENST00000378579
hsa-miR-105-3p	MIMAT0004516	hsa-miR-105*	15.71	0.04	ENST00000313029	XR_018006.1	http://www.ebi.ac.uk/enright-srv/microcosm/cgi-bin/targets/v5/detail_view.pl?transcript_id=ENST00000313029
hsa-miR-105-3p	MIMAT0004516	hsa-miR-105*	16.04	0.02	ENST00000238831	YIPF4	http://www.ebi.ac.uk/enright-srv/microcosm/cgi-bin/targets/v5/detail_view.pl?transcript_id=ENST00000238831
hsa-miR-105-3p	MIMAT0004516	hsa-miR-105*	16.04	0.02	ENST00000379326	YIPF4	http://www.ebi.ac.uk/enright-srv/microcosm/cgi-bin/targets/v5/detail_view.pl?transcript_id=ENST00000379326
hsa-miR-105-3p	MIMAT0004516	hsa-miR-105*	15.74	0.04	ENST00000324589	GALNT14	http://www.ebi.ac.uk/enright-srv/microcosm/cgi-bin/targets/v5/detail_view.pl?transcript_id=ENST00000324589
hsa-miR-105-3p	MIMAT0004516	hsa-miR-105*	15.71	0.04	ENST00000379476	GALNT14	http://www.ebi.ac.uk/enright-srv/microcosm/cgi-bin/targets/v5/detail_view.pl?transcript_id=ENST00000379476
hsa-miR-105-3p	MIMAT0004516	hsa-miR-105*	17.97	0.0033797	ENST00000306108	NP_060380.2	http://www.ebi.ac.uk/enright-srv/microcosm/cgi-bin/targets/v5/detail_view.pl?transcript_id=ENST00000306108
hsa-miR-105-3p	MIMAT0004516	hsa-miR-105*	17.94	0.003483	ENST00000379566	NP_060380.2	http://www.ebi.ac.uk/enright-srv/microcosm/cgi-bin/targets/v5/detail_view.pl?transcript_id=ENST00000379566
hsa-miR-10b-3p	MIMAT0004556	hsa-miR-10b*	17.57	0.01	ENST00000337768	SUPT7L	http://www.ebi.ac.uk/enright-srv/microcosm/cgi-bin/targets/v5/detail_view.pl?transcript_id=ENST00000337768
hsa-miR-105-3p	MIMAT0004516	hsa-miR-105*	15.69	0.04	ENST00000264717	GCKR	http://www.ebi.ac.uk/enright-srv/microcosm/cgi-bin/targets/v5/detail_view.pl?transcript_id=ENST00000264717
hsa-miR-105-3p	MIMAT0004516	hsa-miR-105*	16.1	0.02	ENST00000380044	MPV17	http://www.ebi.ac.uk/enright-srv/microcosm/cgi-bin/targets/v5/detail_view.pl?transcript_id=ENST00000380044
hsa-miR-105-3p	MIMAT0004516	hsa-miR-105*	16.09	0.02	ENST00000380048	MPV17	http://www.ebi.ac.uk/enright-srv/microcosm/cgi-bin/targets/v5/detail_view.pl?transcript_id=ENST00000380048
hsa-miR-105-3p	MIMAT0004516	hsa-miR-105*	16.48	0.01	ENST00000264705	CAD	http://www.ebi.ac.uk/enright-srv/microcosm/cgi-bin/targets/v5/detail_view.pl?transcript_id=ENST00000264705
hsa-miR-105-3p	MIMAT0004516	hsa-miR-105*	16.48	0.01	ENST00000380093	CAD	http://www.ebi.ac.uk/enright-srv/microcosm/cgi-bin/targets/v5/detail_view.pl?transcript_id=ENST00000380093
hsa-miR-105-3p	MIMAT0004516	hsa-miR-105*	15.91	0.03	ENST00000333610	TTC32	http://www.ebi.ac.uk/enright-srv/microcosm/cgi-bin/targets/v5/detail_view.pl?transcript_id=ENST00000333610
hsa-miR-105-3p	MIMAT0004516	hsa-miR-105*	16.83	0.01	ENST00000295083	PQLC3	http://www.ebi.ac.uk/enright-srv/microcosm/cgi-bin/targets/v5/detail_view.pl?transcript_id=ENST00000295083
hsa-miR-105-3p	MIMAT0004516	hsa-miR-105*	16.84	0.01	ENST00000381555	PQLC3	http://www.ebi.ac.uk/enright-srv/microcosm/cgi-bin/targets/v5/detail_view.pl?transcript_id=ENST00000381555
hsa-miR-105-3p	MIMAT0004516	hsa-miR-105*	15.57	0.04	ENST00000381585	C2orf50	http://www.ebi.ac.uk/enright-srv/microcosm/cgi-bin/targets/v5/detail_view.pl?transcript_id=ENST00000381585
hsa-miR-105-3p	MIMAT0004516	hsa-miR-105*	15.29	0.0029023	ENST00000234111	ODC1	http://www.ebi.ac.uk/enright-srv/microcosm/cgi-bin/targets/v5/detail_view.pl?transcript_id=ENST00000234111
hsa-miR-105-3p	MIMAT0004516	hsa-miR-105*	15.18	0.0029023	ENST00000234111	ODC1	http://www.ebi.ac.uk/enright-srv/microcosm/cgi-bin/targets/v5/detail_view.pl?transcript_id=ENST00000234111
hsa-miR-10b-3p	MIMAT0004556	hsa-miR-10b*	16.51	0.03	ENST00000281419	DDEF2	http://www.ebi.ac.uk/enright-srv/microcosm/cgi-bin/targets/v5/detail_view.pl?transcript_id=ENST00000281419
hsa-miR-10b-3p	MIMAT0004556	hsa-miR-10b*	16.11	0.04	ENST00000382027	RNF144	http://www.ebi.ac.uk/enright-srv/microcosm/cgi-bin/targets/v5/detail_view.pl?transcript_id=ENST00000382027
hsa-miR-105-3p	MIMAT0004516	hsa-miR-105*	16.41	0.01	ENST00000382125	TSSC1	http://www.ebi.ac.uk/enright-srv/microcosm/cgi-bin/targets/v5/detail_view.pl?transcript_id=ENST00000382125
hsa-miR-105-3p	MIMAT0004516	hsa-miR-105*	16.33	0.02	ENST00000263884	TSSC1	http://www.ebi.ac.uk/enright-srv/microcosm/cgi-bin/targets/v5/detail_view.pl?transcript_id=ENST00000263884
hsa-miR-105-3p	MIMAT0004516	hsa-miR-105*	16.16	0.02	ENST00000369892	UCKL1	http://www.ebi.ac.uk/enright-srv/microcosm/cgi-bin/targets/v5/detail_view.pl?transcript_id=ENST00000369892
hsa-miR-10b-3p	MIMAT0004556	hsa-miR-10b*	16.56	0.02	ENST00000370003	TNFRSF6B	http://www.ebi.ac.uk/enright-srv/microcosm/cgi-bin/targets/v5/detail_view.pl?transcript_id=ENST00000370003
hsa-miR-10b-3p	MIMAT0004556	hsa-miR-10b*	16.23	0.04	ENST00000370018	TNFRSF6B	http://www.ebi.ac.uk/enright-srv/microcosm/cgi-bin/targets/v5/detail_view.pl?transcript_id=ENST00000370018
hsa-miR-105-3p	MIMAT0004516	hsa-miR-105*	16.14	0.02	ENST00000217182	EEF1A2	http://www.ebi.ac.uk/enright-srv/microcosm/cgi-bin/targets/v5/detail_view.pl?transcript_id=ENST00000217182
hsa-miR-105-3p	MIMAT0004516	hsa-miR-105*	16	0.03	ENST00000370347	Q6ZQP1_HUMAN	http://www.ebi.ac.uk/enright-srv/microcosm/cgi-bin/targets/v5/detail_view.pl?transcript_id=ENST00000370347
hsa-miR-10b-3p	MIMAT0004556	hsa-miR-10b*	16.32	0.03	ENST00000370522	Q6ZNY1_HUMAN	http://www.ebi.ac.uk/enright-srv/microcosm/cgi-bin/targets/v5/detail_view.pl?transcript_id=ENST00000370522
hsa-miR-105-3p	MIMAT0004516	hsa-miR-105*	15.87	0.03	ENST00000370522	Q6ZNY1_HUMAN	http://www.ebi.ac.uk/enright-srv/microcosm/cgi-bin/targets/v5/detail_view.pl?transcript_id=ENST00000370522
hsa-miR-10b-3p	MIMAT0004556	hsa-miR-10b*	15.35	0.0085092	ENST00000370545	GATA5	http://www.ebi.ac.uk/enright-srv/microcosm/cgi-bin/targets/v5/detail_view.pl?transcript_id=ENST00000370545
hsa-miR-10b-3p	MIMAT0004556	hsa-miR-10b*	16.5	0.03	ENST00000355648	PHACTR3	http://www.ebi.ac.uk/enright-srv/microcosm/cgi-bin/targets/v5/detail_view.pl?transcript_id=ENST00000355648
hsa-miR-10b-3p	MIMAT0004556	hsa-miR-10b*	16.49	0.03	ENST00000359926	PHACTR3	http://www.ebi.ac.uk/enright-srv/microcosm/cgi-bin/targets/v5/detail_view.pl?transcript_id=ENST00000359926
hsa-miR-105-3p	MIMAT0004516	hsa-miR-105*	16.79	0.01	ENST00000371081	GNAS	http://www.ebi.ac.uk/enright-srv/microcosm/cgi-bin/targets/v5/detail_view.pl?transcript_id=ENST00000371081
hsa-miR-105-3p	MIMAT0004516	hsa-miR-105*	16.45	0.01	ENST00000371099	GNAS	http://www.ebi.ac.uk/enright-srv/microcosm/cgi-bin/targets/v5/detail_view.pl?transcript_id=ENST00000371099
hsa-miR-105-3p	MIMAT0004516	hsa-miR-105*	15.63	0.04	ENST00000306392	XR_017939.1	http://www.ebi.ac.uk/enright-srv/microcosm/cgi-bin/targets/v5/detail_view.pl?transcript_id=ENST00000306392
hsa-miR-10b-3p	MIMAT0004556	hsa-miR-10b*	16.14	0.04	ENST00000217086	SALL4	http://www.ebi.ac.uk/enright-srv/microcosm/cgi-bin/targets/v5/detail_view.pl?transcript_id=ENST00000217086
hsa-miR-10b-3p	MIMAT0004556	hsa-miR-10b*	15.79	0.003446	ENST00000338821	ATP9A	http://www.ebi.ac.uk/enright-srv/microcosm/cgi-bin/targets/v5/detail_view.pl?transcript_id=ENST00000338821
hsa-miR-10b-3p	MIMAT0004556	hsa-miR-10b*	16.4	0.03	ENST00000352077	ELMO2	http://www.ebi.ac.uk/enright-srv/microcosm/cgi-bin/targets/v5/detail_view.pl?transcript_id=ENST00000352077
hsa-miR-10b-3p	MIMAT0004556	hsa-miR-10b*	16.82	0.0028356	ENST00000372431	PLTP	http://www.ebi.ac.uk/enright-srv/microcosm/cgi-bin/targets/v5/detail_view.pl?transcript_id=ENST00000372431
hsa-miR-105-3p	MIMAT0004516	hsa-miR-105*	16.6	0.01	ENST00000372614	DNTTIP1	http://www.ebi.ac.uk/enright-srv/microcosm/cgi-bin/targets/v5/detail_view.pl?transcript_id=ENST00000372614
hsa-miR-105-3p	MIMAT0004516	hsa-miR-105*	16.6	0.01	ENST00000372622	DNTTIP1	http://www.ebi.ac.uk/enright-srv/microcosm/cgi-bin/targets/v5/detail_view.pl?transcript_id=ENST00000372622
hsa-miR-105-3p	MIMAT0004516	hsa-miR-105*	16.82	0.01	ENST00000330523	WFDC10B	http://www.ebi.ac.uk/enright-srv/microcosm/cgi-bin/targets/v5/detail_view.pl?transcript_id=ENST00000330523
hsa-miR-105-3p	MIMAT0004516	hsa-miR-105*	16.82	0.01	ENST00000372643	WFDC10A	http://www.ebi.ac.uk/enright-srv/microcosm/cgi-bin/targets/v5/detail_view.pl?transcript_id=ENST00000372643
hsa-miR-10b-3p	MIMAT0004556	hsa-miR-10b*	16.53	0.03	ENST00000372785	WFDC12	http://www.ebi.ac.uk/enright-srv/microcosm/cgi-bin/targets/v5/detail_view.pl?transcript_id=ENST00000372785
hsa-miR-10b-3p	MIMAT0004556	hsa-miR-10b*	18.87	0.0029017	ENST00000372861	KCNK15	http://www.ebi.ac.uk/enright-srv/microcosm/cgi-bin/targets/v5/detail_view.pl?transcript_id=ENST00000372861
hsa-miR-10b-3p	MIMAT0004556	hsa-miR-10b*	17.31	0.0028023	ENST00000372874	ADA	http://www.ebi.ac.uk/enright-srv/microcosm/cgi-bin/targets/v5/detail_view.pl?transcript_id=ENST00000372874
hsa-miR-105-3p	MIMAT0004516	hsa-miR-105*	16.48	0.01	ENST00000372913	HNF4A	http://www.ebi.ac.uk/enright-srv/microcosm/cgi-bin/targets/v5/detail_view.pl?transcript_id=ENST00000372913
hsa-miR-105-3p	MIMAT0004516	hsa-miR-105*	16.65	0.01	ENST00000372992	TOX2	http://www.ebi.ac.uk/enright-srv/microcosm/cgi-bin/targets/v5/detail_view.pl?transcript_id=ENST00000372992
hsa-miR-105-3p	MIMAT0004516	hsa-miR-105*	16.12	0.02	ENST00000348077	TOX2	http://www.ebi.ac.uk/enright-srv/microcosm/cgi-bin/targets/v5/detail_view.pl?transcript_id=ENST00000348077
hsa-miR-105-3p	MIMAT0004516	hsa-miR-105*	16.11	0.02	ENST00000372999	TOX2	http://www.ebi.ac.uk/enright-srv/microcosm/cgi-bin/targets/v5/detail_view.pl?transcript_id=ENST00000372999
hsa-miR-10b-3p	MIMAT0004556	hsa-miR-10b*	15.65	0.0067069	ENST00000217026	MYBL2	http://www.ebi.ac.uk/enright-srv/microcosm/cgi-bin/targets/v5/detail_view.pl?transcript_id=ENST00000217026
hsa-miR-10b-3p	MIMAT0004556	hsa-miR-10b*	15.66	0.0024354	ENST00000373039	IFT52	http://www.ebi.ac.uk/enright-srv/microcosm/cgi-bin/targets/v5/detail_view.pl?transcript_id=ENST00000373039
hsa-miR-10b-3p	MIMAT0004556	hsa-miR-10b*	16.53	0.03	ENST00000373397	NP_001025035.1	http://www.ebi.ac.uk/enright-srv/microcosm/cgi-bin/targets/v5/detail_view.pl?transcript_id=ENST00000373397
hsa-miR-10b-3p	MIMAT0004556	hsa-miR-10b*	16.01	0.04	ENST00000373694	SAMHD1	http://www.ebi.ac.uk/enright-srv/microcosm/cgi-bin/targets/v5/detail_view.pl?transcript_id=ENST00000373694
hsa-miR-105-3p	MIMAT0004516	hsa-miR-105*	15.85	0.03	ENST00000279022	MYL9	http://www.ebi.ac.uk/enright-srv/microcosm/cgi-bin/targets/v5/detail_view.pl?transcript_id=ENST00000279022
hsa-miR-105-3p	MIMAT0004516	hsa-miR-105*	15.8	0.0026027	ENST00000374072	C20orf52	http://www.ebi.ac.uk/enright-srv/microcosm/cgi-bin/targets/v5/detail_view.pl?transcript_id=ENST00000374072
hsa-miR-105-3p	MIMAT0004516	hsa-miR-105*	15.23	0.0026027	ENST00000374072	C20orf52	http://www.ebi.ac.uk/enright-srv/microcosm/cgi-bin/targets/v5/detail_view.pl?transcript_id=ENST00000374072
hsa-miR-105-3p	MIMAT0004516	hsa-miR-105*	15.57	0.04	ENST00000291303	MYH7B	http://www.ebi.ac.uk/enright-srv/microcosm/cgi-bin/targets/v5/detail_view.pl?transcript_id=ENST00000291303
hsa-miR-105-3p	MIMAT0004516	hsa-miR-105*	15.57	0.04	ENST00000374615	MYH7B	http://www.ebi.ac.uk/enright-srv/microcosm/cgi-bin/targets/v5/detail_view.pl?transcript_id=ENST00000374615
hsa-miR-10b-3p	MIMAT0004556	hsa-miR-10b*	16.07	0.04	ENST00000300469	DYNLRB1	http://www.ebi.ac.uk/enright-srv/microcosm/cgi-bin/targets/v5/detail_view.pl?transcript_id=ENST00000300469
hsa-miR-10b-3p	MIMAT0004556	hsa-miR-10b*	17.24	0.01	ENST00000344201	CBFA2T2	http://www.ebi.ac.uk/enright-srv/microcosm/cgi-bin/targets/v5/detail_view.pl?transcript_id=ENST00000344201
hsa-miR-10b-3p	MIMAT0004556	hsa-miR-10b*	16.23	0.04	ENST00000246222	null	http://www.ebi.ac.uk/enright-srv/microcosm/cgi-bin/targets/v5/detail_view.pl?transcript_id=ENST00000246222
hsa-miR-10b-3p	MIMAT0004556	hsa-miR-10b*	16.64	0.02	ENST00000375673	C20orf112	http://www.ebi.ac.uk/enright-srv/microcosm/cgi-bin/targets/v5/detail_view.pl?transcript_id=ENST00000375673
hsa-miR-10b-3p	MIMAT0004556	hsa-miR-10b*	17.91	0.0075946	ENST00000375689	ASXL1	http://www.ebi.ac.uk/enright-srv/microcosm/cgi-bin/targets/v5/detail_view.pl?transcript_id=ENST00000375689
hsa-miR-105-3p	MIMAT0004516	hsa-miR-105*	15.7	0.04	ENST00000375689	ASXL1	http://www.ebi.ac.uk/enright-srv/microcosm/cgi-bin/targets/v5/detail_view.pl?transcript_id=ENST00000375689
hsa-miR-10b-3p	MIMAT0004556	hsa-miR-10b*	16.14	0.04	ENST00000339144	DEFB119	http://www.ebi.ac.uk/enright-srv/microcosm/cgi-bin/targets/v5/detail_view.pl?transcript_id=ENST00000339144
hsa-miR-10b-3p	MIMAT0004556	hsa-miR-10b*	16.03	0.04	ENST00000376707	VSX1	http://www.ebi.ac.uk/enright-srv/microcosm/cgi-bin/targets/v5/detail_view.pl?transcript_id=ENST00000376707
hsa-miR-105-3p	MIMAT0004516	hsa-miR-105*	15.69	0.04	ENST00000376979	CST9L	http://www.ebi.ac.uk/enright-srv/microcosm/cgi-bin/targets/v5/detail_view.pl?transcript_id=ENST00000376979
hsa-miR-10b-3p	MIMAT0004556	hsa-miR-10b*	16.4	0.03	ENST00000318613	C20orf19	http://www.ebi.ac.uk/enright-srv/microcosm/cgi-bin/targets/v5/detail_view.pl?transcript_id=ENST00000318613
hsa-miR-105-3p	MIMAT0004516	hsa-miR-105*	17.05	0.0042149	ENST00000377671	ZNF133	http://www.ebi.ac.uk/enright-srv/microcosm/cgi-bin/targets/v5/detail_view.pl?transcript_id=ENST00000377671
hsa-miR-105-3p	MIMAT0004516	hsa-miR-105*	15	0.0042149	ENST00000377671	ZNF133	http://www.ebi.ac.uk/enright-srv/microcosm/cgi-bin/targets/v5/detail_view.pl?transcript_id=ENST00000377671
hsa-miR-10b-3p	MIMAT0004556	hsa-miR-10b*	17.96	0.0072372	ENST00000378858	C20orf75	http://www.ebi.ac.uk/enright-srv/microcosm/cgi-bin/targets/v5/detail_view.pl?transcript_id=ENST00000378858
hsa-miR-10b-3p	MIMAT0004556	hsa-miR-10b*	16.77	0.02	ENST00000316562	PANK2	http://www.ebi.ac.uk/enright-srv/microcosm/cgi-bin/targets/v5/detail_view.pl?transcript_id=ENST00000316562
hsa-miR-10b-3p	MIMAT0004556	hsa-miR-10b*	16.77	0.02	ENST00000361370	PANK2	http://www.ebi.ac.uk/enright-srv/microcosm/cgi-bin/targets/v5/detail_view.pl?transcript_id=ENST00000361370
hsa-miR-105-3p	MIMAT0004516	hsa-miR-105*	16.69	0.01	ENST00000381643	NSFL1C	http://www.ebi.ac.uk/enright-srv/microcosm/cgi-bin/targets/v5/detail_view.pl?transcript_id=ENST00000381643
hsa-miR-10b-3p	MIMAT0004556	hsa-miR-10b*	16.23	0.04	ENST00000381724	FKBP1A	http://www.ebi.ac.uk/enright-srv/microcosm/cgi-bin/targets/v5/detail_view.pl?transcript_id=ENST00000381724
hsa-miR-105-3p	MIMAT0004516	hsa-miR-105*	15.79	0.03	ENST00000381724	FKBP1A	http://www.ebi.ac.uk/enright-srv/microcosm/cgi-bin/targets/v5/detail_view.pl?transcript_id=ENST00000381724
hsa-miR-10b-3p	MIMAT0004556	hsa-miR-10b*	17.74	0.0090526	ENST00000246108	Q9H4I0_HUMAN	http://www.ebi.ac.uk/enright-srv/microcosm/cgi-bin/targets/v5/detail_view.pl?transcript_id=ENST00000246108
hsa-miR-10b-3p	MIMAT0004556	hsa-miR-10b*	15.91	0.003638	ENST00000360321	C20orf96	http://www.ebi.ac.uk/enright-srv/microcosm/cgi-bin/targets/v5/detail_view.pl?transcript_id=ENST00000360321
hsa-miR-105-3p	MIMAT0004516	hsa-miR-105*	16.3	0.02	ENST00000389383	NR_002934.2	http://www.ebi.ac.uk/enright-srv/microcosm/cgi-bin/targets/v5/detail_view.pl?transcript_id=ENST00000389383
hsa-miR-105-3p	MIMAT0004516	hsa-miR-105*	16.1	0.02	ENST00000318060	EBF3	http://www.ebi.ac.uk/enright-srv/microcosm/cgi-bin/targets/v5/detail_view.pl?transcript_id=ENST00000318060
hsa-miR-105-3p	MIMAT0004516	hsa-miR-105*	16.39	0.02	ENST00000299130	BCCIP	http://www.ebi.ac.uk/enright-srv/microcosm/cgi-bin/targets/v5/detail_view.pl?transcript_id=ENST00000299130
hsa-miR-105-3p	MIMAT0004516	hsa-miR-105*	16.6	0.01	ENST00000368774	UROS	http://www.ebi.ac.uk/enright-srv/microcosm/cgi-bin/targets/v5/detail_view.pl?transcript_id=ENST00000368774
hsa-miR-10b-3p	MIMAT0004556	hsa-miR-10b*	18.41	0.0033979	ENST00000368821	C10orf122	http://www.ebi.ac.uk/enright-srv/microcosm/cgi-bin/targets/v5/detail_view.pl?transcript_id=ENST00000368821
hsa-miR-105-3p	MIMAT0004516	hsa-miR-105*	17.51	0.005724	ENST00000368821	C10orf122	http://www.ebi.ac.uk/enright-srv/microcosm/cgi-bin/targets/v5/detail_view.pl?transcript_id=ENST00000368821
hsa-miR-105-3p	MIMAT0004516	hsa-miR-105*	16.6	0.01	ENST00000369017	NSMCE4A	http://www.ebi.ac.uk/enright-srv/microcosm/cgi-bin/targets/v5/detail_view.pl?transcript_id=ENST00000369017
hsa-miR-105-3p	MIMAT0004516	hsa-miR-105*	15.57	0.04	ENST00000369171	C10orf84	http://www.ebi.ac.uk/enright-srv/microcosm/cgi-bin/targets/v5/detail_view.pl?transcript_id=ENST00000369171
hsa-miR-105-3p	MIMAT0004516	hsa-miR-105*	15.57	0.04	ENST00000369172	C10orf84	http://www.ebi.ac.uk/enright-srv/microcosm/cgi-bin/targets/v5/detail_view.pl?transcript_id=ENST00000369172
hsa-miR-105-3p	MIMAT0004516	hsa-miR-105*	15.57	0.04	ENST00000369703	C10orf80	http://www.ebi.ac.uk/enright-srv/microcosm/cgi-bin/targets/v5/detail_view.pl?transcript_id=ENST00000369703
hsa-miR-10b-3p	MIMAT0004556	hsa-miR-10b*	17.96	0.0072372	ENST00000369719	C10orf79	http://www.ebi.ac.uk/enright-srv/microcosm/cgi-bin/targets/v5/detail_view.pl?transcript_id=ENST00000369719
hsa-miR-10b-3p	MIMAT0004556	hsa-miR-10b*	16.36	0.03	ENST00000369783	FAM26A	http://www.ebi.ac.uk/enright-srv/microcosm/cgi-bin/targets/v5/detail_view.pl?transcript_id=ENST00000369783
hsa-miR-10b-3p	MIMAT0004556	hsa-miR-10b*	15.39	0.0040766	ENST00000369883	AS3MT	http://www.ebi.ac.uk/enright-srv/microcosm/cgi-bin/targets/v5/detail_view.pl?transcript_id=ENST00000369883
hsa-miR-105-3p	MIMAT0004516	hsa-miR-105*	15.93	0.03	ENST00000370110	NPM3	http://www.ebi.ac.uk/enright-srv/microcosm/cgi-bin/targets/v5/detail_view.pl?transcript_id=ENST00000370110
hsa-miR-105-3p	MIMAT0004516	hsa-miR-105*	16.82	0.01	ENST00000370215	PDZD7	http://www.ebi.ac.uk/enright-srv/microcosm/cgi-bin/targets/v5/detail_view.pl?transcript_id=ENST00000370215
hsa-miR-105-3p	MIMAT0004516	hsa-miR-105*	15.57	0.04	ENST00000370241	MRPL43	http://www.ebi.ac.uk/enright-srv/microcosm/cgi-bin/targets/v5/detail_view.pl?transcript_id=ENST00000370241
hsa-miR-10b-3p	MIMAT0004556	hsa-miR-10b*	16.83	0.02	ENST00000370508	GOT1	http://www.ebi.ac.uk/enright-srv/microcosm/cgi-bin/targets/v5/detail_view.pl?transcript_id=ENST00000370508
hsa-miR-105-3p	MIMAT0004516	hsa-miR-105*	15.73	0.04	ENST00000370552	HPSE2	http://www.ebi.ac.uk/enright-srv/microcosm/cgi-bin/targets/v5/detail_view.pl?transcript_id=ENST00000370552
hsa-miR-105-3p	MIMAT0004516	hsa-miR-105*	15.95	0.00088637	ENST00000338546	HPS1	http://www.ebi.ac.uk/enright-srv/microcosm/cgi-bin/targets/v5/detail_view.pl?transcript_id=ENST00000338546
hsa-miR-105-3p	MIMAT0004516	hsa-miR-105*	15.73	0.00088637	ENST00000338546	HPS1	http://www.ebi.ac.uk/enright-srv/microcosm/cgi-bin/targets/v5/detail_view.pl?transcript_id=ENST00000338546
hsa-miR-105-3p	MIMAT0004516	hsa-miR-105*	15.35	0.004096	ENST00000371206	ENTPD1	http://www.ebi.ac.uk/enright-srv/microcosm/cgi-bin/targets/v5/detail_view.pl?transcript_id=ENST00000371206
hsa-miR-105-3p	MIMAT0004516	hsa-miR-105*	15.02	0.004096	ENST00000371206	ENTPD1	http://www.ebi.ac.uk/enright-srv/microcosm/cgi-bin/targets/v5/detail_view.pl?transcript_id=ENST00000371206
hsa-miR-105-3p	MIMAT0004516	hsa-miR-105*	15.57	0.04	ENST00000265993	C10orf61	http://www.ebi.ac.uk/enright-srv/microcosm/cgi-bin/targets/v5/detail_view.pl?transcript_id=ENST00000265993
hsa-miR-105-3p	MIMAT0004516	hsa-miR-105*	15.57	0.04	ENST00000343162	C10orf61	http://www.ebi.ac.uk/enright-srv/microcosm/cgi-bin/targets/v5/detail_view.pl?transcript_id=ENST00000343162
hsa-miR-10b-3p	MIMAT0004556	hsa-miR-10b*	16.37	0.03	ENST00000371463	RBP4	http://www.ebi.ac.uk/enright-srv/microcosm/cgi-bin/targets/v5/detail_view.pl?transcript_id=ENST00000371463
hsa-miR-10b-3p	MIMAT0004556	hsa-miR-10b*	16.24	0.0041475	ENST00000371930	ANKRD22	http://www.ebi.ac.uk/enright-srv/microcosm/cgi-bin/targets/v5/detail_view.pl?transcript_id=ENST00000371930
hsa-miR-105-3p	MIMAT0004516	hsa-miR-105*	16.82	0.01	ENST00000381697	FAM22A	http://www.ebi.ac.uk/enright-srv/microcosm/cgi-bin/targets/v5/detail_view.pl?transcript_id=ENST00000381697
hsa-miR-105-3p	MIMAT0004516	hsa-miR-105*	16.82	0.01	ENST00000381707	FAM22A	http://www.ebi.ac.uk/enright-srv/microcosm/cgi-bin/targets/v5/detail_view.pl?transcript_id=ENST00000381707
hsa-miR-105-3p	MIMAT0004516	hsa-miR-105*	16.82	0.01	ENST00000298189	null	http://www.ebi.ac.uk/enright-srv/microcosm/cgi-bin/targets/v5/detail_view.pl?transcript_id=ENST00000298189
hsa-miR-105-3p	MIMAT0004516	hsa-miR-105*	16.82	0.01	ENST00000372303	FAM22C	http://www.ebi.ac.uk/enright-srv/microcosm/cgi-bin/targets/v5/detail_view.pl?transcript_id=ENST00000372303
hsa-miR-105-3p	MIMAT0004516	hsa-miR-105*	16.82	0.01	ENST00000342531	FAM22B	http://www.ebi.ac.uk/enright-srv/microcosm/cgi-bin/targets/v5/detail_view.pl?transcript_id=ENST00000342531
hsa-miR-105-3p	MIMAT0004516	hsa-miR-105*	16.82	0.01	ENST00000372323	FAM22B	http://www.ebi.ac.uk/enright-srv/microcosm/cgi-bin/targets/v5/detail_view.pl?transcript_id=ENST00000372323
hsa-miR-10b-3p	MIMAT0004556	hsa-miR-10b*	16.42	0.03	ENST00000356343	Q9P1K6_HUMAN	http://www.ebi.ac.uk/enright-srv/microcosm/cgi-bin/targets/v5/detail_view.pl?transcript_id=ENST00000356343
hsa-miR-10b-3p	MIMAT0004556	hsa-miR-10b*	16.82	0.02	ENST00000372690	SAMD8	http://www.ebi.ac.uk/enright-srv/microcosm/cgi-bin/targets/v5/detail_view.pl?transcript_id=ENST00000372690
hsa-miR-105-3p	MIMAT0004516	hsa-miR-105*	16.17	0.02	ENST00000372698	DUSP13	http://www.ebi.ac.uk/enright-srv/microcosm/cgi-bin/targets/v5/detail_view.pl?transcript_id=ENST00000372698
hsa-miR-105-3p	MIMAT0004516	hsa-miR-105*	15.99	0.03	ENST00000356369	DUSP13	http://www.ebi.ac.uk/enright-srv/microcosm/cgi-bin/targets/v5/detail_view.pl?transcript_id=ENST00000356369
hsa-miR-105-3p	MIMAT0004516	hsa-miR-105*	17.16	0.00842	ENST00000372714	MYST4	http://www.ebi.ac.uk/enright-srv/microcosm/cgi-bin/targets/v5/detail_view.pl?transcript_id=ENST00000372714
hsa-miR-10b-3p	MIMAT0004556	hsa-miR-10b*	15.57	0.02	ENST00000359322	MYOZ1	http://www.ebi.ac.uk/enright-srv/microcosm/cgi-bin/targets/v5/detail_view.pl?transcript_id=ENST00000359322
hsa-miR-105-3p	MIMAT0004516	hsa-miR-105*	16.94	0.01	ENST00000372912	ZMYND17	http://www.ebi.ac.uk/enright-srv/microcosm/cgi-bin/targets/v5/detail_view.pl?transcript_id=ENST00000372912
hsa-miR-105-3p	MIMAT0004516	hsa-miR-105*	17.46	0.006025	ENST00000373232	PPA1	http://www.ebi.ac.uk/enright-srv/microcosm/cgi-bin/targets/v5/detail_view.pl?transcript_id=ENST00000373232
hsa-miR-10b-3p	MIMAT0004556	hsa-miR-10b*	16.02	0.04	ENST00000373290	TSPAN15	http://www.ebi.ac.uk/enright-srv/microcosm/cgi-bin/targets/v5/detail_view.pl?transcript_id=ENST00000373290
hsa-miR-105-3p	MIMAT0004516	hsa-miR-105*	16.58	0.01	ENST00000242465	SRGN	http://www.ebi.ac.uk/enright-srv/microcosm/cgi-bin/targets/v5/detail_view.pl?transcript_id=ENST00000242465
hsa-miR-10b-3p	MIMAT0004556	hsa-miR-10b*	16.47	0.03	ENST00000373675	MYPN	http://www.ebi.ac.uk/enright-srv/microcosm/cgi-bin/targets/v5/detail_view.pl?transcript_id=ENST00000373675
hsa-miR-10b-3p	MIMAT0004556	hsa-miR-10b*	16.03	0.04	ENST00000339758	DNAJC12	http://www.ebi.ac.uk/enright-srv/microcosm/cgi-bin/targets/v5/detail_view.pl?transcript_id=ENST00000339758
hsa-miR-10b-3p	MIMAT0004556	hsa-miR-10b*	15.77	0.00080618	ENST00000225171	DNAJC12	http://www.ebi.ac.uk/enright-srv/microcosm/cgi-bin/targets/v5/detail_view.pl?transcript_id=ENST00000225171
hsa-miR-105-3p	MIMAT0004516	hsa-miR-105*	15.6	0.04	ENST00000373811	CDC2	http://www.ebi.ac.uk/enright-srv/microcosm/cgi-bin/targets/v5/detail_view.pl?transcript_id=ENST00000373811
hsa-miR-105-3p	MIMAT0004516	hsa-miR-105*	16.94	0.01	ENST00000373940	ZWINT	http://www.ebi.ac.uk/enright-srv/microcosm/cgi-bin/targets/v5/detail_view.pl?transcript_id=ENST00000373940
hsa-miR-105-3p	MIMAT0004516	hsa-miR-105*	15.57	0.04	ENST00000374151	C10orf128	http://www.ebi.ac.uk/enright-srv/microcosm/cgi-bin/targets/v5/detail_view.pl?transcript_id=ENST00000374151
hsa-miR-10b-3p	MIMAT0004556	hsa-miR-10b*	16.14	0.04	ENST00000325239	WDFY4	http://www.ebi.ac.uk/enright-srv/microcosm/cgi-bin/targets/v5/detail_view.pl?transcript_id=ENST00000325239
hsa-miR-10b-3p	MIMAT0004556	hsa-miR-10b*	16.65	0.02	ENST00000298129	ZNF488	http://www.ebi.ac.uk/enright-srv/microcosm/cgi-bin/targets/v5/detail_view.pl?transcript_id=ENST00000298129
hsa-miR-10b-3p	MIMAT0004556	hsa-miR-10b*	16.82	0.02	ENST00000374258	ANXA8	http://www.ebi.ac.uk/enright-srv/microcosm/cgi-bin/targets/v5/detail_view.pl?transcript_id=ENST00000374258
hsa-miR-10b-3p	MIMAT0004556	hsa-miR-10b*	16.82	0.02	ENST00000335083	ANXA8L2	http://www.ebi.ac.uk/enright-srv/microcosm/cgi-bin/targets/v5/detail_view.pl?transcript_id=ENST00000335083
hsa-miR-10b-3p	MIMAT0004556	hsa-miR-10b*	17.15	0.01	ENST00000319426	Q8N8J2_HUMAN	http://www.ebi.ac.uk/enright-srv/microcosm/cgi-bin/targets/v5/detail_view.pl?transcript_id=ENST00000319426
hsa-miR-10b-3p	MIMAT0004556	hsa-miR-10b*	16.43	0.03	ENST00000361807	ZNF485	http://www.ebi.ac.uk/enright-srv/microcosm/cgi-bin/targets/v5/detail_view.pl?transcript_id=ENST00000361807
hsa-miR-10b-3p	MIMAT0004556	hsa-miR-10b*	16.08	0.04	ENST00000374559	HSD17B7P2	http://www.ebi.ac.uk/enright-srv/microcosm/cgi-bin/targets/v5/detail_view.pl?transcript_id=ENST00000374559
hsa-miR-10b-3p	MIMAT0004556	hsa-miR-10b*	18.3	0.0051397	ENST00000319742	HSD17B7P2	http://www.ebi.ac.uk/enright-srv/microcosm/cgi-bin/targets/v5/detail_view.pl?transcript_id=ENST00000319742
hsa-miR-105-3p	MIMAT0004516	hsa-miR-105*	16.6	0.01	ENST00000319742	HSD17B7P2	http://www.ebi.ac.uk/enright-srv/microcosm/cgi-bin/targets/v5/detail_view.pl?transcript_id=ENST00000319742
hsa-miR-10b-3p	MIMAT0004556	hsa-miR-10b*	16.37	0.03	ENST00000374570	HSD17B7P2	http://www.ebi.ac.uk/enright-srv/microcosm/cgi-bin/targets/v5/detail_view.pl?transcript_id=ENST00000374570
hsa-miR-10b-3p	MIMAT0004556	hsa-miR-10b*	16.92	0.02	ENST00000277668	HSD17B7P2	http://www.ebi.ac.uk/enright-srv/microcosm/cgi-bin/targets/v5/detail_view.pl?transcript_id=ENST00000277668
hsa-miR-10b-3p	MIMAT0004556	hsa-miR-10b*	16.73	0.02	ENST00000374589	HSD17B7P2	http://www.ebi.ac.uk/enright-srv/microcosm/cgi-bin/targets/v5/detail_view.pl?transcript_id=ENST00000374589
hsa-miR-105-3p	MIMAT0004516	hsa-miR-105*	16.85	0.01	ENST00000375646	WAC	http://www.ebi.ac.uk/enright-srv/microcosm/cgi-bin/targets/v5/detail_view.pl?transcript_id=ENST00000375646
hsa-miR-10b-3p	MIMAT0004556	hsa-miR-10b*	16.71	0.02	ENST00000376215	PDSS1	http://www.ebi.ac.uk/enright-srv/microcosm/cgi-bin/targets/v5/detail_view.pl?transcript_id=ENST00000376215
hsa-miR-105-3p	MIMAT0004516	hsa-miR-105*	15.71	0.0011733	ENST00000376236	APBB1IP	http://www.ebi.ac.uk/enright-srv/microcosm/cgi-bin/targets/v5/detail_view.pl?transcript_id=ENST00000376236
hsa-miR-105-3p	MIMAT0004516	hsa-miR-105*	15.6	0.0011733	ENST00000376236	APBB1IP	http://www.ebi.ac.uk/enright-srv/microcosm/cgi-bin/targets/v5/detail_view.pl?transcript_id=ENST00000376236
hsa-miR-10b-3p	MIMAT0004556	hsa-miR-10b*	16.71	0.02	ENST00000307544	KIAA1217	http://www.ebi.ac.uk/enright-srv/microcosm/cgi-bin/targets/v5/detail_view.pl?transcript_id=ENST00000307544
hsa-miR-10b-3p	MIMAT0004556	hsa-miR-10b*	15.69	0.0023286	ENST00000376776	COMMD3	http://www.ebi.ac.uk/enright-srv/microcosm/cgi-bin/targets/v5/detail_view.pl?transcript_id=ENST00000376776
hsa-miR-10b-3p	MIMAT0004556	hsa-miR-10b*	15.63	0.0026011	ENST00000376787	COMMD3	http://www.ebi.ac.uk/enright-srv/microcosm/cgi-bin/targets/v5/detail_view.pl?transcript_id=ENST00000376787
hsa-miR-10b-3p	MIMAT0004556	hsa-miR-10b*	15.64	0.0025451	ENST00000376836	COMMD3	http://www.ebi.ac.uk/enright-srv/microcosm/cgi-bin/targets/v5/detail_view.pl?transcript_id=ENST00000376836
hsa-miR-105-3p	MIMAT0004516	hsa-miR-105*	15.92	0.03	ENST00000377912	RSU1	http://www.ebi.ac.uk/enright-srv/microcosm/cgi-bin/targets/v5/detail_view.pl?transcript_id=ENST00000377912
hsa-miR-10b-3p	MIMAT0004556	hsa-miR-10b*	16.55	0.003532	ENST00000378572	PRPF18	http://www.ebi.ac.uk/enright-srv/microcosm/cgi-bin/targets/v5/detail_view.pl?transcript_id=ENST00000378572
hsa-miR-105-3p	MIMAT0004516	hsa-miR-105*	15.68	0.04	ENST00000378605	C10orf30	http://www.ebi.ac.uk/enright-srv/microcosm/cgi-bin/targets/v5/detail_view.pl?transcript_id=ENST00000378605
hsa-miR-10b-3p	MIMAT0004556	hsa-miR-10b*	16.42	0.0036886	ENST00000341083	C10orf30	http://www.ebi.ac.uk/enright-srv/microcosm/cgi-bin/targets/v5/detail_view.pl?transcript_id=ENST00000341083
hsa-miR-105-3p	MIMAT0004516	hsa-miR-105*	15.8	0.03	ENST00000379025	SEC61A2	http://www.ebi.ac.uk/enright-srv/microcosm/cgi-bin/targets/v5/detail_view.pl?transcript_id=ENST00000379025
hsa-miR-10b-3p	MIMAT0004556	hsa-miR-10b*	17.24	0.01	ENST00000379200	C10orf47	http://www.ebi.ac.uk/enright-srv/microcosm/cgi-bin/targets/v5/detail_view.pl?transcript_id=ENST00000379200
hsa-miR-10b-3p	MIMAT0004556	hsa-miR-10b*	17.24	0.01	ENST00000379208	C10orf47	http://www.ebi.ac.uk/enright-srv/microcosm/cgi-bin/targets/v5/detail_view.pl?transcript_id=ENST00000379208
hsa-miR-105-3p	MIMAT0004516	hsa-miR-105*	15.85	0.03	ENST00000383826	OGG1	http://www.ebi.ac.uk/enright-srv/microcosm/cgi-bin/targets/v5/detail_view.pl?transcript_id=ENST00000383826
hsa-miR-10b-3p	MIMAT0004556	hsa-miR-10b*	16.22	0.04	ENST00000302463	SETD5	http://www.ebi.ac.uk/enright-srv/microcosm/cgi-bin/targets/v5/detail_view.pl?transcript_id=ENST00000302463
hsa-miR-10b-3p	MIMAT0004556	hsa-miR-10b*	16.3	0.03	ENST00000383834	XR_017845.1	http://www.ebi.ac.uk/enright-srv/microcosm/cgi-bin/targets/v5/detail_view.pl?transcript_id=ENST00000383834
hsa-miR-105-3p	MIMAT0004516	hsa-miR-105*	15.8	0.03	ENST00000383838	C3orf32	http://www.ebi.ac.uk/enright-srv/microcosm/cgi-bin/targets/v5/detail_view.pl?transcript_id=ENST00000383838
hsa-miR-10b-3p	MIMAT0004556	hsa-miR-10b*	15.72	7.8607e-05	ENST00000157600	LMCD1	http://www.ebi.ac.uk/enright-srv/microcosm/cgi-bin/targets/v5/detail_view.pl?transcript_id=ENST00000157600
hsa-miR-105-3p	MIMAT0004516	hsa-miR-105*	16.04	0.02	ENST00000256496	ARL8B	http://www.ebi.ac.uk/enright-srv/microcosm/cgi-bin/targets/v5/detail_view.pl?transcript_id=ENST00000256496
hsa-miR-105-3p	MIMAT0004516	hsa-miR-105*	15.98	0.03	ENST00000383842	ARL8B	http://www.ebi.ac.uk/enright-srv/microcosm/cgi-bin/targets/v5/detail_view.pl?transcript_id=ENST00000383842
hsa-miR-105-3p	MIMAT0004516	hsa-miR-105*	16.25	0.02	ENST00000357086	ITPR1	http://www.ebi.ac.uk/enright-srv/microcosm/cgi-bin/targets/v5/detail_view.pl?transcript_id=ENST00000357086
hsa-miR-10b-3p	MIMAT0004556	hsa-miR-10b*	16.3	0.03	ENST00000383844	SUMF1	http://www.ebi.ac.uk/enright-srv/microcosm/cgi-bin/targets/v5/detail_view.pl?transcript_id=ENST00000383844
hsa-miR-10b-3p	MIMAT0004556	hsa-miR-10b*	15.37	0.0044626	ENST00000231948	CRBN	http://www.ebi.ac.uk/enright-srv/microcosm/cgi-bin/targets/v5/detail_view.pl?transcript_id=ENST00000231948
hsa-miR-10b-3p	MIMAT0004556	hsa-miR-10b*	15.36	0.0045055	ENST00000383845	CRBN	http://www.ebi.ac.uk/enright-srv/microcosm/cgi-bin/targets/v5/detail_view.pl?transcript_id=ENST00000383845
hsa-miR-105-3p	MIMAT0004516	hsa-miR-105*	16.27	0.02	ENST00000375815	COL4A1	http://www.ebi.ac.uk/enright-srv/microcosm/cgi-bin/targets/v5/detail_view.pl?transcript_id=ENST00000375815
hsa-miR-105-3p	MIMAT0004516	hsa-miR-105*	16.27	0.02	ENST00000375820	COL4A1	http://www.ebi.ac.uk/enright-srv/microcosm/cgi-bin/targets/v5/detail_view.pl?transcript_id=ENST00000375820
hsa-miR-10b-3p	MIMAT0004556	hsa-miR-10b*	17.05	0.01	ENST00000375954	ERCC5	http://www.ebi.ac.uk/enright-srv/microcosm/cgi-bin/targets/v5/detail_view.pl?transcript_id=ENST00000375954
hsa-miR-10b-3p	MIMAT0004556	hsa-miR-10b*	17.05	0.01	ENST00000375971	ERCC5	http://www.ebi.ac.uk/enright-srv/microcosm/cgi-bin/targets/v5/detail_view.pl?transcript_id=ENST00000375971
hsa-miR-105-3p	MIMAT0004516	hsa-miR-105*	16.06	0.02	ENST00000376022	C13orf27	http://www.ebi.ac.uk/enright-srv/microcosm/cgi-bin/targets/v5/detail_view.pl?transcript_id=ENST00000376022
hsa-miR-105-3p	MIMAT0004516	hsa-miR-105*	16.71	0.01	ENST00000376021	C13orf27	http://www.ebi.ac.uk/enright-srv/microcosm/cgi-bin/targets/v5/detail_view.pl?transcript_id=ENST00000376021
hsa-miR-105-3p	MIMAT0004516	hsa-miR-105*	15.64	0.04	ENST00000376027	C13orf27	http://www.ebi.ac.uk/enright-srv/microcosm/cgi-bin/targets/v5/detail_view.pl?transcript_id=ENST00000376027
hsa-miR-105-3p	MIMAT0004516	hsa-miR-105*	15.74	0.04	ENST00000376032	C13orf27	http://www.ebi.ac.uk/enright-srv/microcosm/cgi-bin/targets/v5/detail_view.pl?transcript_id=ENST00000376032
hsa-miR-10b-3p	MIMAT0004556	hsa-miR-10b*	16.59	0.02	ENST00000376250	Q9BVM4_HUMAN	http://www.ebi.ac.uk/enright-srv/microcosm/cgi-bin/targets/v5/detail_view.pl?transcript_id=ENST00000376250
hsa-miR-10b-3p	MIMAT0004556	hsa-miR-10b*	15.68	0.01	ENST00000376335	ZIC2	http://www.ebi.ac.uk/enright-srv/microcosm/cgi-bin/targets/v5/detail_view.pl?transcript_id=ENST00000376335
hsa-miR-10b-3p	MIMAT0004556	hsa-miR-10b*	16.14	0.04	ENST00000340454	TM9SF2	http://www.ebi.ac.uk/enright-srv/microcosm/cgi-bin/targets/v5/detail_view.pl?transcript_id=ENST00000340454
hsa-miR-105-3p	MIMAT0004516	hsa-miR-105*	16.48	0.01	ENST00000376705	HS6ST3	http://www.ebi.ac.uk/enright-srv/microcosm/cgi-bin/targets/v5/detail_view.pl?transcript_id=ENST00000376705
hsa-miR-10b-3p	MIMAT0004556	hsa-miR-10b*	15.56	0.0057774	ENST00000327303	RBM26	http://www.ebi.ac.uk/enright-srv/microcosm/cgi-bin/targets/v5/detail_view.pl?transcript_id=ENST00000327303
hsa-miR-105-3p	MIMAT0004516	hsa-miR-105*	15.66	0.04	ENST00000359684	DACH1	http://www.ebi.ac.uk/enright-srv/microcosm/cgi-bin/targets/v5/detail_view.pl?transcript_id=ENST00000359684
hsa-miR-105-3p	MIMAT0004516	hsa-miR-105*	16.42	0.01	ENST00000378135	UTP14C	http://www.ebi.ac.uk/enright-srv/microcosm/cgi-bin/targets/v5/detail_view.pl?transcript_id=ENST00000378135
hsa-miR-105-3p	MIMAT0004516	hsa-miR-105*	15.6	0.04	ENST00000317013	Q8N1X6_HUMAN	http://www.ebi.ac.uk/enright-srv/microcosm/cgi-bin/targets/v5/detail_view.pl?transcript_id=ENST00000317013
hsa-miR-10b-3p	MIMAT0004556	hsa-miR-10b*	16.28	0.03	ENST00000298125	WDFY2	http://www.ebi.ac.uk/enright-srv/microcosm/cgi-bin/targets/v5/detail_view.pl?transcript_id=ENST00000298125
hsa-miR-10b-3p	MIMAT0004556	hsa-miR-10b*	16.14	0.04	ENST00000378270	EBPL	http://www.ebi.ac.uk/enright-srv/microcosm/cgi-bin/targets/v5/detail_view.pl?transcript_id=ENST00000378270
hsa-miR-10b-3p	MIMAT0004556	hsa-miR-10b*	16.48	0.03	ENST00000378268	EBPL	http://www.ebi.ac.uk/enright-srv/microcosm/cgi-bin/targets/v5/detail_view.pl?transcript_id=ENST00000378268
hsa-miR-10b-3p	MIMAT0004556	hsa-miR-10b*	16.37	0.03	ENST00000242827	EBPL	http://www.ebi.ac.uk/enright-srv/microcosm/cgi-bin/targets/v5/detail_view.pl?transcript_id=ENST00000242827
hsa-miR-10b-3p	MIMAT0004556	hsa-miR-10b*	16.37	0.03	ENST00000378282	EBPL	http://www.ebi.ac.uk/enright-srv/microcosm/cgi-bin/targets/v5/detail_view.pl?transcript_id=ENST00000378282
hsa-miR-105-3p	MIMAT0004516	hsa-miR-105*	15.57	0.04	ENST00000347776	CAB39L	http://www.ebi.ac.uk/enright-srv/microcosm/cgi-bin/targets/v5/detail_view.pl?transcript_id=ENST00000347776
hsa-miR-10b-3p	MIMAT0004556	hsa-miR-10b*	16.48	0.03	ENST00000378584	Q5T909_HUMAN	http://www.ebi.ac.uk/enright-srv/microcosm/cgi-bin/targets/v5/detail_view.pl?transcript_id=ENST00000378584
hsa-miR-10b-3p	MIMAT0004556	hsa-miR-10b*	15.57	0.0056307	ENST00000378720	ESD	http://www.ebi.ac.uk/enright-srv/microcosm/cgi-bin/targets/v5/detail_view.pl?transcript_id=ENST00000378720
hsa-miR-105-3p	MIMAT0004516	hsa-miR-105*	16.49	0.01	ENST00000379176	C13orf21	http://www.ebi.ac.uk/enright-srv/microcosm/cgi-bin/targets/v5/detail_view.pl?transcript_id=ENST00000379176
hsa-miR-105-3p	MIMAT0004516	hsa-miR-105*	17.12	0.008869	ENST00000379179	C13orf21	http://www.ebi.ac.uk/enright-srv/microcosm/cgi-bin/targets/v5/detail_view.pl?transcript_id=ENST00000379179
hsa-miR-105-3p	MIMAT0004516	hsa-miR-105*	16.08	0.02	ENST00000379609	C13orf23	http://www.ebi.ac.uk/enright-srv/microcosm/cgi-bin/targets/v5/detail_view.pl?transcript_id=ENST00000379609
hsa-miR-10b-3p	MIMAT0004556	hsa-miR-10b*	16.14	0.04	ENST00000379848	LOC646871	http://www.ebi.ac.uk/enright-srv/microcosm/cgi-bin/targets/v5/detail_view.pl?transcript_id=ENST00000379848
hsa-miR-105-3p	MIMAT0004516	hsa-miR-105*	15.67	0.04	ENST00000379892	DCLK1	http://www.ebi.ac.uk/enright-srv/microcosm/cgi-bin/targets/v5/detail_view.pl?transcript_id=ENST00000379892
hsa-miR-10b-3p	MIMAT0004556	hsa-miR-10b*	16.11	0.04	ENST00000380129	NP_438169.2	http://www.ebi.ac.uk/enright-srv/microcosm/cgi-bin/targets/v5/detail_view.pl?transcript_id=ENST00000380129
hsa-miR-10b-3p	MIMAT0004556	hsa-miR-10b*	16.48	0.00049811	ENST00000380136	NP_438169.2	http://www.ebi.ac.uk/enright-srv/microcosm/cgi-bin/targets/v5/detail_view.pl?transcript_id=ENST00000380136
hsa-miR-105-3p	MIMAT0004516	hsa-miR-105*	15.69	0.04	ENST00000298386	RXFP2	http://www.ebi.ac.uk/enright-srv/microcosm/cgi-bin/targets/v5/detail_view.pl?transcript_id=ENST00000298386
hsa-miR-105-3p	MIMAT0004516	hsa-miR-105*	15.69	0.04	ENST00000339626	RNF6	http://www.ebi.ac.uk/enright-srv/microcosm/cgi-bin/targets/v5/detail_view.pl?transcript_id=ENST00000339626
hsa-miR-10b-3p	MIMAT0004556	hsa-miR-10b*	16.19	0.04	ENST00000381718	NUPL1	http://www.ebi.ac.uk/enright-srv/microcosm/cgi-bin/targets/v5/detail_view.pl?transcript_id=ENST00000381718
hsa-miR-105-3p	MIMAT0004516	hsa-miR-105*	15.91	0.03	ENST00000332281	SNAI3	http://www.ebi.ac.uk/enright-srv/microcosm/cgi-bin/targets/v5/detail_view.pl?transcript_id=ENST00000332281
hsa-miR-105-3p	MIMAT0004516	hsa-miR-105*	16.6	0.01	ENST00000347925	KLHDC4	http://www.ebi.ac.uk/enright-srv/microcosm/cgi-bin/targets/v5/detail_view.pl?transcript_id=ENST00000347925
hsa-miR-105-3p	MIMAT0004516	hsa-miR-105*	16.6	0.01	ENST00000270583	KLHDC4	http://www.ebi.ac.uk/enright-srv/microcosm/cgi-bin/targets/v5/detail_view.pl?transcript_id=ENST00000270583
hsa-miR-105-3p	MIMAT0004516	hsa-miR-105*	15.8	0.03	ENST00000308251	KCNG4	http://www.ebi.ac.uk/enright-srv/microcosm/cgi-bin/targets/v5/detail_view.pl?transcript_id=ENST00000308251
hsa-miR-10b-3p	MIMAT0004556	hsa-miR-10b*	16.23	0.0022734	ENST00000343939	OSGIN1	http://www.ebi.ac.uk/enright-srv/microcosm/cgi-bin/targets/v5/detail_view.pl?transcript_id=ENST00000343939
hsa-miR-10b-3p	MIMAT0004556	hsa-miR-10b*	16.76	0.02	ENST00000248272	GAN	http://www.ebi.ac.uk/enright-srv/microcosm/cgi-bin/targets/v5/detail_view.pl?transcript_id=ENST00000248272
hsa-miR-105-3p	MIMAT0004516	hsa-miR-105*	16.2	0.02	ENST00000337114	PKD1L2	http://www.ebi.ac.uk/enright-srv/microcosm/cgi-bin/targets/v5/detail_view.pl?transcript_id=ENST00000337114
hsa-miR-10b-3p	MIMAT0004556	hsa-miR-10b*	16.29	0.03	ENST00000162330	BCAR1	http://www.ebi.ac.uk/enright-srv/microcosm/cgi-bin/targets/v5/detail_view.pl?transcript_id=ENST00000162330
hsa-miR-10b-3p	MIMAT0004556	hsa-miR-10b*	16.48	0.03	ENST00000303037	CTRB2	http://www.ebi.ac.uk/enright-srv/microcosm/cgi-bin/targets/v5/detail_view.pl?transcript_id=ENST00000303037
hsa-miR-10b-3p	MIMAT0004556	hsa-miR-10b*	17	0.01	ENST00000389390	MLKL	http://www.ebi.ac.uk/enright-srv/microcosm/cgi-bin/targets/v5/detail_view.pl?transcript_id=ENST00000389390
hsa-miR-10b-3p	MIMAT0004556	hsa-miR-10b*	17.79	0.0085948	ENST00000308807	MLKL	http://www.ebi.ac.uk/enright-srv/microcosm/cgi-bin/targets/v5/detail_view.pl?transcript_id=ENST00000308807
hsa-miR-10b-3p	MIMAT0004556	hsa-miR-10b*	17.77	0.0087452	ENST00000306247	MLKL	http://www.ebi.ac.uk/enright-srv/microcosm/cgi-bin/targets/v5/detail_view.pl?transcript_id=ENST00000306247
hsa-miR-105-3p	MIMAT0004516	hsa-miR-105*	15.6	0.04	ENST00000389332	AARS	http://www.ebi.ac.uk/enright-srv/microcosm/cgi-bin/targets/v5/detail_view.pl?transcript_id=ENST00000389332
hsa-miR-105-3p	MIMAT0004516	hsa-miR-105*	15.76	0.04	ENST00000254942	TERF2	http://www.ebi.ac.uk/enright-srv/microcosm/cgi-bin/targets/v5/detail_view.pl?transcript_id=ENST00000254942
hsa-miR-10b-3p	MIMAT0004556	hsa-miR-10b*	16.15	0.04	ENST00000358896	DUS2L	http://www.ebi.ac.uk/enright-srv/microcosm/cgi-bin/targets/v5/detail_view.pl?transcript_id=ENST00000358896
hsa-miR-105-3p	MIMAT0004516	hsa-miR-105*	16.12	0.02	ENST00000379312	FAM65A	http://www.ebi.ac.uk/enright-srv/microcosm/cgi-bin/targets/v5/detail_view.pl?transcript_id=ENST00000379312
hsa-miR-105-3p	MIMAT0004516	hsa-miR-105*	15.6	0.04	ENST00000327655	GPR97	http://www.ebi.ac.uk/enright-srv/microcosm/cgi-bin/targets/v5/detail_view.pl?transcript_id=ENST00000327655
hsa-miR-10b-3p	MIMAT0004556	hsa-miR-10b*	15.97	0.0033279	ENST00000245157	BBS2	http://www.ebi.ac.uk/enright-srv/microcosm/cgi-bin/targets/v5/detail_view.pl?transcript_id=ENST00000245157
hsa-miR-105-3p	MIMAT0004516	hsa-miR-105*	15.57	0.04	ENST00000329734	IRX3	http://www.ebi.ac.uk/enright-srv/microcosm/cgi-bin/targets/v5/detail_view.pl?transcript_id=ENST00000329734
hsa-miR-10b-3p	MIMAT0004556	hsa-miR-10b*	16.08	0.03	ENST00000251020	SALL1	http://www.ebi.ac.uk/enright-srv/microcosm/cgi-bin/targets/v5/detail_view.pl?transcript_id=ENST00000251020
hsa-miR-10b-3p	MIMAT0004556	hsa-miR-10b*	16.37	0.03	ENST00000299197	BRD7	http://www.ebi.ac.uk/enright-srv/microcosm/cgi-bin/targets/v5/detail_view.pl?transcript_id=ENST00000299197
hsa-miR-10b-3p	MIMAT0004556	hsa-miR-10b*	16.08	0.04	ENST00000311303	ABCC12	http://www.ebi.ac.uk/enright-srv/microcosm/cgi-bin/targets/v5/detail_view.pl?transcript_id=ENST00000311303
hsa-miR-10b-3p	MIMAT0004556	hsa-miR-10b*	16.3	0.03	ENST00000332505	CCNYL3	http://www.ebi.ac.uk/enright-srv/microcosm/cgi-bin/targets/v5/detail_view.pl?transcript_id=ENST00000332505
hsa-miR-105-3p	MIMAT0004516	hsa-miR-105*	15.95	0.03	ENST00000268297	ITGAD	http://www.ebi.ac.uk/enright-srv/microcosm/cgi-bin/targets/v5/detail_view.pl?transcript_id=ENST00000268297
hsa-miR-10b-3p	MIMAT0004556	hsa-miR-10b*	16.37	0.03	ENST00000247470	PYCARD	http://www.ebi.ac.uk/enright-srv/microcosm/cgi-bin/targets/v5/detail_view.pl?transcript_id=ENST00000247470
hsa-miR-10b-3p	MIMAT0004556	hsa-miR-10b*	16.36	0.03	ENST00000354711	FUS	http://www.ebi.ac.uk/enright-srv/microcosm/cgi-bin/targets/v5/detail_view.pl?transcript_id=ENST00000354711
hsa-miR-10b-3p	MIMAT0004556	hsa-miR-10b*	18.61	0.0037552	ENST00000300850	ZNF646	http://www.ebi.ac.uk/enright-srv/microcosm/cgi-bin/targets/v5/detail_view.pl?transcript_id=ENST00000300850
hsa-miR-105-3p	MIMAT0004516	hsa-miR-105*	15.94	0.03	ENST00000262518	NP_006653.1	http://www.ebi.ac.uk/enright-srv/microcosm/cgi-bin/targets/v5/detail_view.pl?transcript_id=ENST00000262518
hsa-miR-10b-3p	MIMAT0004556	hsa-miR-10b*	16.74	0.02	ENST00000350119	DOC2A	http://www.ebi.ac.uk/enright-srv/microcosm/cgi-bin/targets/v5/detail_view.pl?transcript_id=ENST00000350119
hsa-miR-10b-3p	MIMAT0004556	hsa-miR-10b*	16.23	0.04	ENST00000380594	Q6P435_HUMAN	http://www.ebi.ac.uk/enright-srv/microcosm/cgi-bin/targets/v5/detail_view.pl?transcript_id=ENST00000380594
hsa-miR-10b-3p	MIMAT0004556	hsa-miR-10b*	15.93	0.0039973	ENST00000323081	LAT	http://www.ebi.ac.uk/enright-srv/microcosm/cgi-bin/targets/v5/detail_view.pl?transcript_id=ENST00000323081
hsa-miR-10b-3p	MIMAT0004556	hsa-miR-10b*	15.4	0.0039973	ENST00000323081	LAT	http://www.ebi.ac.uk/enright-srv/microcosm/cgi-bin/targets/v5/detail_view.pl?transcript_id=ENST00000323081
hsa-miR-105-3p	MIMAT0004516	hsa-miR-105*	16.48	0.01	ENST00000311008	LAT	http://www.ebi.ac.uk/enright-srv/microcosm/cgi-bin/targets/v5/detail_view.pl?transcript_id=ENST00000311008
hsa-miR-105-3p	MIMAT0004516	hsa-miR-105*	15.86	0.03	ENST00000358928	LOC728632	http://www.ebi.ac.uk/enright-srv/microcosm/cgi-bin/targets/v5/detail_view.pl?transcript_id=ENST00000358928
hsa-miR-10b-3p	MIMAT0004556	hsa-miR-10b*	15.55	0.0029861	ENST00000300093	PLK1	http://www.ebi.ac.uk/enright-srv/microcosm/cgi-bin/targets/v5/detail_view.pl?transcript_id=ENST00000300093
hsa-miR-105-3p	MIMAT0004516	hsa-miR-105*	17.19	0.0082052	ENST00000331057	Q8NHV5-2	http://www.ebi.ac.uk/enright-srv/microcosm/cgi-bin/targets/v5/detail_view.pl?transcript_id=ENST00000331057
hsa-miR-10b-3p	MIMAT0004556	hsa-miR-10b*	16.42	0.03	ENST00000251143	NP_064710.3	http://www.ebi.ac.uk/enright-srv/microcosm/cgi-bin/targets/v5/detail_view.pl?transcript_id=ENST00000251143
hsa-miR-105-3p	MIMAT0004516	hsa-miR-105*	16.71	0.01	ENST00000355377	SYT17	http://www.ebi.ac.uk/enright-srv/microcosm/cgi-bin/targets/v5/detail_view.pl?transcript_id=ENST00000355377
hsa-miR-105-3p	MIMAT0004516	hsa-miR-105*	16.14	0.02	ENST00000287706	NTAN1	http://www.ebi.ac.uk/enright-srv/microcosm/cgi-bin/targets/v5/detail_view.pl?transcript_id=ENST00000287706
hsa-miR-10b-3p	MIMAT0004556	hsa-miR-10b*	18.19	0.0057371	ENST00000333763	NP_001072996.1	http://www.ebi.ac.uk/enright-srv/microcosm/cgi-bin/targets/v5/detail_view.pl?transcript_id=ENST00000333763
hsa-miR-105-3p	MIMAT0004516	hsa-miR-105*	16.86	0.01	ENST00000333763	NP_001072996.1	http://www.ebi.ac.uk/enright-srv/microcosm/cgi-bin/targets/v5/detail_view.pl?transcript_id=ENST00000333763
hsa-miR-10b-3p	MIMAT0004556	hsa-miR-10b*	16.76	0.02	ENST00000343519	MKL2	http://www.ebi.ac.uk/enright-srv/microcosm/cgi-bin/targets/v5/detail_view.pl?transcript_id=ENST00000343519
hsa-miR-105-3p	MIMAT0004516	hsa-miR-105*	15.8	0.03	ENST00000312511	PRM1	http://www.ebi.ac.uk/enright-srv/microcosm/cgi-bin/targets/v5/detail_view.pl?transcript_id=ENST00000312511
hsa-miR-105-3p	MIMAT0004516	hsa-miR-105*	15.93	0.03	ENST00000324570	ATF7IP2	http://www.ebi.ac.uk/enright-srv/microcosm/cgi-bin/targets/v5/detail_view.pl?transcript_id=ENST00000324570
hsa-miR-105-3p	MIMAT0004516	hsa-miR-105*	16.29	0.02	ENST00000356427	ATF7IP2	http://www.ebi.ac.uk/enright-srv/microcosm/cgi-bin/targets/v5/detail_view.pl?transcript_id=ENST00000356427
hsa-miR-105-3p	MIMAT0004516	hsa-miR-105*	15.2	0.0028011	ENST00000333050	TMEM186	http://www.ebi.ac.uk/enright-srv/microcosm/cgi-bin/targets/v5/detail_view.pl?transcript_id=ENST00000333050
hsa-miR-105-3p	MIMAT0004516	hsa-miR-105*	15.2	0.0028011	ENST00000333050	TMEM186	http://www.ebi.ac.uk/enright-srv/microcosm/cgi-bin/targets/v5/detail_view.pl?transcript_id=ENST00000333050
hsa-miR-10b-3p	MIMAT0004556	hsa-miR-10b*	17.36	0.01	ENST00000304283	ANKS3	http://www.ebi.ac.uk/enright-srv/microcosm/cgi-bin/targets/v5/detail_view.pl?transcript_id=ENST00000304283
hsa-miR-105-3p	MIMAT0004516	hsa-miR-105*	15.91	0.03	ENST00000382184	LOC197350	http://www.ebi.ac.uk/enright-srv/microcosm/cgi-bin/targets/v5/detail_view.pl?transcript_id=ENST00000382184
hsa-miR-10b-3p	MIMAT0004556	hsa-miR-10b*	16.67	0.00052935	ENST00000161006	PRSS22	http://www.ebi.ac.uk/enright-srv/microcosm/cgi-bin/targets/v5/detail_view.pl?transcript_id=ENST00000161006
hsa-miR-10b-3p	MIMAT0004556	hsa-miR-10b*	16.45	0.00052935	ENST00000161006	PRSS22	http://www.ebi.ac.uk/enright-srv/microcosm/cgi-bin/targets/v5/detail_view.pl?transcript_id=ENST00000161006
hsa-miR-10b-3p	MIMAT0004556	hsa-miR-10b*	16.48	0.03	ENST00000293983	U773_HUMAN	http://www.ebi.ac.uk/enright-srv/microcosm/cgi-bin/targets/v5/detail_view.pl?transcript_id=ENST00000293983
hsa-miR-10b-3p	MIMAT0004556	hsa-miR-10b*	15.91	0.0029586	ENST00000215539	IGFALS	http://www.ebi.ac.uk/enright-srv/microcosm/cgi-bin/targets/v5/detail_view.pl?transcript_id=ENST00000215539
hsa-miR-105-3p	MIMAT0004516	hsa-miR-105*	15.75	0.04	ENST00000219302	NME3	http://www.ebi.ac.uk/enright-srv/microcosm/cgi-bin/targets/v5/detail_view.pl?transcript_id=ENST00000219302
hsa-miR-105-3p	MIMAT0004516	hsa-miR-105*	17.28	0.0074045	ENST00000357532	ARRDC1	http://www.ebi.ac.uk/enright-srv/microcosm/cgi-bin/targets/v5/detail_view.pl?transcript_id=ENST00000357532
hsa-miR-105-3p	MIMAT0004516	hsa-miR-105*	15.69	0.04	ENST00000371449	PNPLA7	http://www.ebi.ac.uk/enright-srv/microcosm/cgi-bin/targets/v5/detail_view.pl?transcript_id=ENST00000371449
hsa-miR-105-3p	MIMAT0004516	hsa-miR-105*	15.91	0.03	ENST00000359069	NP_945352.1	http://www.ebi.ac.uk/enright-srv/microcosm/cgi-bin/targets/v5/detail_view.pl?transcript_id=ENST00000359069
hsa-miR-105-3p	MIMAT0004516	hsa-miR-105*	15.58	0.04	ENST00000360483	C9orf86	http://www.ebi.ac.uk/enright-srv/microcosm/cgi-bin/targets/v5/detail_view.pl?transcript_id=ENST00000360483
hsa-miR-10b-3p	MIMAT0004556	hsa-miR-10b*	17.11	0.0045997	ENST00000371732	CARD9	http://www.ebi.ac.uk/enright-srv/microcosm/cgi-bin/targets/v5/detail_view.pl?transcript_id=ENST00000371732
hsa-miR-10b-3p	MIMAT0004556	hsa-miR-10b*	15.32	0.0045997	ENST00000371732	CARD9	http://www.ebi.ac.uk/enright-srv/microcosm/cgi-bin/targets/v5/detail_view.pl?transcript_id=ENST00000371732
hsa-miR-105-3p	MIMAT0004516	hsa-miR-105*	15.88	0.03	ENST00000241600	MRPS2	http://www.ebi.ac.uk/enright-srv/microcosm/cgi-bin/targets/v5/detail_view.pl?transcript_id=ENST00000241600
hsa-miR-105-3p	MIMAT0004516	hsa-miR-105*	15.77	0.03	ENST00000371785	MRPS2	http://www.ebi.ac.uk/enright-srv/microcosm/cgi-bin/targets/v5/detail_view.pl?transcript_id=ENST00000371785
hsa-miR-10b-3p	MIMAT0004556	hsa-miR-10b*	17.67	0.0097325	ENST00000372153	DDX31	http://www.ebi.ac.uk/enright-srv/microcosm/cgi-bin/targets/v5/detail_view.pl?transcript_id=ENST00000372153
hsa-miR-10b-3p	MIMAT0004556	hsa-miR-10b*	15.74	0.0044452	ENST00000372159	DDX31	http://www.ebi.ac.uk/enright-srv/microcosm/cgi-bin/targets/v5/detail_view.pl?transcript_id=ENST00000372159
hsa-miR-10b-3p	MIMAT0004556	hsa-miR-10b*	16.42	0.03	ENST00000372350	EXOSC2	http://www.ebi.ac.uk/enright-srv/microcosm/cgi-bin/targets/v5/detail_view.pl?transcript_id=ENST00000372350
hsa-miR-10b-3p	MIMAT0004556	hsa-miR-10b*	16.28	0.03	ENST00000372358	EXOSC2	http://www.ebi.ac.uk/enright-srv/microcosm/cgi-bin/targets/v5/detail_view.pl?transcript_id=ENST00000372358
hsa-miR-10b-3p	MIMAT0004556	hsa-miR-10b*	16.48	0.03	ENST00000372898	C9orf119	http://www.ebi.ac.uk/enright-srv/microcosm/cgi-bin/targets/v5/detail_view.pl?transcript_id=ENST00000372898
hsa-miR-10b-3p	MIMAT0004556	hsa-miR-10b*	16.37	0.03	ENST00000373387	GARNL3	http://www.ebi.ac.uk/enright-srv/microcosm/cgi-bin/targets/v5/detail_view.pl?transcript_id=ENST00000373387
hsa-miR-105-3p	MIMAT0004516	hsa-miR-105*	15.69	0.04	ENST00000373387	GARNL3	http://www.ebi.ac.uk/enright-srv/microcosm/cgi-bin/targets/v5/detail_view.pl?transcript_id=ENST00000373387
hsa-miR-105-3p	MIMAT0004516	hsa-miR-105*	15.93	0.03	ENST00000373434	RALGPS1	http://www.ebi.ac.uk/enright-srv/microcosm/cgi-bin/targets/v5/detail_view.pl?transcript_id=ENST00000373434
hsa-miR-10b-3p	MIMAT0004556	hsa-miR-10b*	17.15	0.002666	ENST00000373439	RALGPS1	http://www.ebi.ac.uk/enright-srv/microcosm/cgi-bin/targets/v5/detail_view.pl?transcript_id=ENST00000373439
hsa-miR-105-3p	MIMAT0004516	hsa-miR-105*	16.03	0.03	ENST00000373538	RABEPK	http://www.ebi.ac.uk/enright-srv/microcosm/cgi-bin/targets/v5/detail_view.pl?transcript_id=ENST00000373538
hsa-miR-10b-3p	MIMAT0004556	hsa-miR-10b*	17.05	0.0045244	ENST00000373654	ZBTB26	http://www.ebi.ac.uk/enright-srv/microcosm/cgi-bin/targets/v5/detail_view.pl?transcript_id=ENST00000373654
hsa-miR-10b-3p	MIMAT0004556	hsa-miR-10b*	15.33	0.0045244	ENST00000373654	ZBTB26	http://www.ebi.ac.uk/enright-srv/microcosm/cgi-bin/targets/v5/detail_view.pl?transcript_id=ENST00000373654
hsa-miR-10b-3p	MIMAT0004556	hsa-miR-10b*	17.62	0.01	ENST00000373723	MRRF	http://www.ebi.ac.uk/enright-srv/microcosm/cgi-bin/targets/v5/detail_view.pl?transcript_id=ENST00000373723
hsa-miR-105-3p	MIMAT0004516	hsa-miR-105*	17.39	0.0065106	ENST00000373844	CEP110	http://www.ebi.ac.uk/enright-srv/microcosm/cgi-bin/targets/v5/detail_view.pl?transcript_id=ENST00000373844
hsa-miR-10b-3p	MIMAT0004556	hsa-miR-10b*	16.48	0.03	ENST00000373847	CEP110	http://www.ebi.ac.uk/enright-srv/microcosm/cgi-bin/targets/v5/detail_view.pl?transcript_id=ENST00000373847
hsa-miR-105-3p	MIMAT0004516	hsa-miR-105*	15.84	0.03	ENST00000374016	DEC1	http://www.ebi.ac.uk/enright-srv/microcosm/cgi-bin/targets/v5/detail_view.pl?transcript_id=ENST00000374016
hsa-miR-10b-3p	MIMAT0004556	hsa-miR-10b*	16.71	0.02	ENST00000309195	LTB4DH	http://www.ebi.ac.uk/enright-srv/microcosm/cgi-bin/targets/v5/detail_view.pl?transcript_id=ENST00000309195
hsa-miR-10b-3p	MIMAT0004556	hsa-miR-10b*	16.5	0.03	ENST00000374507	TXNDC8	http://www.ebi.ac.uk/enright-srv/microcosm/cgi-bin/targets/v5/detail_view.pl?transcript_id=ENST00000374507
hsa-miR-10b-3p	MIMAT0004556	hsa-miR-10b*	15.6	0.0053297	ENST00000374581	C9orf4	http://www.ebi.ac.uk/enright-srv/microcosm/cgi-bin/targets/v5/detail_view.pl?transcript_id=ENST00000374581
hsa-miR-10b-3p	MIMAT0004556	hsa-miR-10b*	16.4	0.03	ENST00000374779	OR13C5	http://www.ebi.ac.uk/enright-srv/microcosm/cgi-bin/targets/v5/detail_view.pl?transcript_id=ENST00000374779
hsa-miR-105-3p	MIMAT0004516	hsa-miR-105*	16.03	0.03	ENST00000374801	C9orf107	http://www.ebi.ac.uk/enright-srv/microcosm/cgi-bin/targets/v5/detail_view.pl?transcript_id=ENST00000374801
hsa-miR-105-3p	MIMAT0004516	hsa-miR-105*	16.11	0.02	ENST00000262457	INVS	http://www.ebi.ac.uk/enright-srv/microcosm/cgi-bin/targets/v5/detail_view.pl?transcript_id=ENST00000262457
hsa-miR-105-3p	MIMAT0004516	hsa-miR-105*	16.14	0.02	ENST00000375082	TRIM14	http://www.ebi.ac.uk/enright-srv/microcosm/cgi-bin/targets/v5/detail_view.pl?transcript_id=ENST00000375082
hsa-miR-10b-3p	MIMAT0004556	hsa-miR-10b*	20.23	0.00073345	ENST00000342043	TRIM14	http://www.ebi.ac.uk/enright-srv/microcosm/cgi-bin/targets/v5/detail_view.pl?transcript_id=ENST00000342043
hsa-miR-10b-3p	MIMAT0004556	hsa-miR-10b*	16.1	0.04	ENST00000358778	HIATL2	http://www.ebi.ac.uk/enright-srv/microcosm/cgi-bin/targets/v5/detail_view.pl?transcript_id=ENST00000358778
hsa-miR-10b-3p	MIMAT0004556	hsa-miR-10b*	16.27	0.03	ENST00000375251	HABP4	http://www.ebi.ac.uk/enright-srv/microcosm/cgi-bin/targets/v5/detail_view.pl?transcript_id=ENST00000375251
hsa-miR-105-3p	MIMAT0004516	hsa-miR-105*	15.6	0.04	ENST00000375274	PTCH1	http://www.ebi.ac.uk/enright-srv/microcosm/cgi-bin/targets/v5/detail_view.pl?transcript_id=ENST00000375274
hsa-miR-105-3p	MIMAT0004516	hsa-miR-105*	15.8	0.03	ENST00000375326	FBP1	http://www.ebi.ac.uk/enright-srv/microcosm/cgi-bin/targets/v5/detail_view.pl?transcript_id=ENST00000375326
hsa-miR-10b-3p	MIMAT0004556	hsa-miR-10b*	17.08	0.01	ENST00000375354	ZNF169	http://www.ebi.ac.uk/enright-srv/microcosm/cgi-bin/targets/v5/detail_view.pl?transcript_id=ENST00000375354
hsa-miR-105-3p	MIMAT0004516	hsa-miR-105*	15.8	0.03	ENST00000332591	ZNF484	http://www.ebi.ac.uk/enright-srv/microcosm/cgi-bin/targets/v5/detail_view.pl?transcript_id=ENST00000332591
hsa-miR-10b-3p	MIMAT0004556	hsa-miR-10b*	15.71	0.0081628	ENST00000375807	SECISBP2	http://www.ebi.ac.uk/enright-srv/microcosm/cgi-bin/targets/v5/detail_view.pl?transcript_id=ENST00000375807
hsa-miR-105-3p	MIMAT0004516	hsa-miR-105*	17.05	0.0095735	ENST00000375835	SHC3	http://www.ebi.ac.uk/enright-srv/microcosm/cgi-bin/targets/v5/detail_view.pl?transcript_id=ENST00000375835
hsa-miR-10b-3p	MIMAT0004556	hsa-miR-10b*	16.83	0.02	ENST00000339137	C9orf153	http://www.ebi.ac.uk/enright-srv/microcosm/cgi-bin/targets/v5/detail_view.pl?transcript_id=ENST00000339137
hsa-miR-105-3p	MIMAT0004516	hsa-miR-105*	16.28	0.02	ENST00000339137	C9orf153	http://www.ebi.ac.uk/enright-srv/microcosm/cgi-bin/targets/v5/detail_view.pl?transcript_id=ENST00000339137
hsa-miR-105-3p	MIMAT0004516	hsa-miR-105*	15.87	0.03	ENST00000376263	HNRPK	http://www.ebi.ac.uk/enright-srv/microcosm/cgi-bin/targets/v5/detail_view.pl?transcript_id=ENST00000376263
hsa-miR-10b-3p	MIMAT0004556	hsa-miR-10b*	15.8	0.0018744	ENST00000376340	C9orf64	http://www.ebi.ac.uk/enright-srv/microcosm/cgi-bin/targets/v5/detail_view.pl?transcript_id=ENST00000376340
hsa-miR-10b-3p	MIMAT0004556	hsa-miR-10b*	17.85	0.0081435	ENST00000376447	RASEF	http://www.ebi.ac.uk/enright-srv/microcosm/cgi-bin/targets/v5/detail_view.pl?transcript_id=ENST00000376447
hsa-miR-105-3p	MIMAT0004516	hsa-miR-105*	15.57	0.04	ENST00000376447	RASEF	http://www.ebi.ac.uk/enright-srv/microcosm/cgi-bin/targets/v5/detail_view.pl?transcript_id=ENST00000376447
hsa-miR-10b-3p	MIMAT0004556	hsa-miR-10b*	16.25	0.03	ENST00000376484	TLE1	http://www.ebi.ac.uk/enright-srv/microcosm/cgi-bin/targets/v5/detail_view.pl?transcript_id=ENST00000376484
hsa-miR-10b-3p	MIMAT0004556	hsa-miR-10b*	16.21	0.0018286	ENST00000355002	TLE1	http://www.ebi.ac.uk/enright-srv/microcosm/cgi-bin/targets/v5/detail_view.pl?transcript_id=ENST00000355002
hsa-miR-105-3p	MIMAT0004516	hsa-miR-105*	15.57	0.04	ENST00000355002	TLE1	http://www.ebi.ac.uk/enright-srv/microcosm/cgi-bin/targets/v5/detail_view.pl?transcript_id=ENST00000355002
hsa-miR-10b-3p	MIMAT0004556	hsa-miR-10b*	16.2	0.0018838	ENST00000376499	TLE1	http://www.ebi.ac.uk/enright-srv/microcosm/cgi-bin/targets/v5/detail_view.pl?transcript_id=ENST00000376499
hsa-miR-105-3p	MIMAT0004516	hsa-miR-105*	16.94	0.01	ENST00000376767	PCSK5	http://www.ebi.ac.uk/enright-srv/microcosm/cgi-bin/targets/v5/detail_view.pl?transcript_id=ENST00000376767
hsa-miR-10b-3p	MIMAT0004556	hsa-miR-10b*	16.22	0.04	ENST00000376830	C9orf41	http://www.ebi.ac.uk/enright-srv/microcosm/cgi-bin/targets/v5/detail_view.pl?transcript_id=ENST00000376830
hsa-miR-105-3p	MIMAT0004516	hsa-miR-105*	15.63	0.04	ENST00000377231	Q59F31_HUMAN	http://www.ebi.ac.uk/enright-srv/microcosm/cgi-bin/targets/v5/detail_view.pl?transcript_id=ENST00000377231
hsa-miR-10b-3p	MIMAT0004556	hsa-miR-10b*	16.73	0.02	ENST00000377349	CBWD3	http://www.ebi.ac.uk/enright-srv/microcosm/cgi-bin/targets/v5/detail_view.pl?transcript_id=ENST00000377349
hsa-miR-10b-3p	MIMAT0004556	hsa-miR-10b*	16.63	0.02	ENST00000377380	CBWD5	http://www.ebi.ac.uk/enright-srv/microcosm/cgi-bin/targets/v5/detail_view.pl?transcript_id=ENST00000377380
hsa-miR-10b-3p	MIMAT0004556	hsa-miR-10b*	16.7	0.02	ENST00000377441	CBWD6	http://www.ebi.ac.uk/enright-srv/microcosm/cgi-bin/targets/v5/detail_view.pl?transcript_id=ENST00000377441
hsa-miR-10b-3p	MIMAT0004556	hsa-miR-10b*	16.31	0.03	ENST00000377445	CBWD6	http://www.ebi.ac.uk/enright-srv/microcosm/cgi-bin/targets/v5/detail_view.pl?transcript_id=ENST00000377445
hsa-miR-10b-3p	MIMAT0004556	hsa-miR-10b*	15.71	0.0022382	ENST00000377477	ANKRD20A3	http://www.ebi.ac.uk/enright-srv/microcosm/cgi-bin/targets/v5/detail_view.pl?transcript_id=ENST00000377477
hsa-miR-10b-3p	MIMAT0004556	hsa-miR-10b*	15.71	0.0022382	ENST00000377477	ANKRD20A3	http://www.ebi.ac.uk/enright-srv/microcosm/cgi-bin/targets/v5/detail_view.pl?transcript_id=ENST00000377477
hsa-miR-10b-3p	MIMAT0004556	hsa-miR-10b*	18.04	0.0067033	ENST00000377515	Q96HX1_HUMAN	http://www.ebi.ac.uk/enright-srv/microcosm/cgi-bin/targets/v5/detail_view.pl?transcript_id=ENST00000377515
hsa-miR-105-3p	MIMAT0004516	hsa-miR-105*	15.98	0.03	ENST00000377522	FAM27D1	http://www.ebi.ac.uk/enright-srv/microcosm/cgi-bin/targets/v5/detail_view.pl?transcript_id=ENST00000377522
hsa-miR-105-3p	MIMAT0004516	hsa-miR-105*	16.6	0.01	ENST00000377523	FAM27D1	http://www.ebi.ac.uk/enright-srv/microcosm/cgi-bin/targets/v5/detail_view.pl?transcript_id=ENST00000377523
hsa-miR-10b-3p	MIMAT0004556	hsa-miR-10b*	18.04	0.0067033	ENST00000377538	Q96HX1_HUMAN	http://www.ebi.ac.uk/enright-srv/microcosm/cgi-bin/targets/v5/detail_view.pl?transcript_id=ENST00000377538
hsa-miR-10b-3p	MIMAT0004556	hsa-miR-10b*	15.71	0.0022382	ENST00000254835	ANKRD20A1	http://www.ebi.ac.uk/enright-srv/microcosm/cgi-bin/targets/v5/detail_view.pl?transcript_id=ENST00000254835
hsa-miR-10b-3p	MIMAT0004556	hsa-miR-10b*	15.71	0.0022382	ENST00000254835	ANKRD20A1	http://www.ebi.ac.uk/enright-srv/microcosm/cgi-bin/targets/v5/detail_view.pl?transcript_id=ENST00000254835
hsa-miR-10b-3p	MIMAT0004556	hsa-miR-10b*	15.71	0.0022382	ENST00000377601	ANKRD20A2	http://www.ebi.ac.uk/enright-srv/microcosm/cgi-bin/targets/v5/detail_view.pl?transcript_id=ENST00000377601
hsa-miR-10b-3p	MIMAT0004556	hsa-miR-10b*	15.71	0.0022382	ENST00000377601	ANKRD20A2	http://www.ebi.ac.uk/enright-srv/microcosm/cgi-bin/targets/v5/detail_view.pl?transcript_id=ENST00000377601
hsa-miR-10b-3p	MIMAT0004556	hsa-miR-10b*	15.69	0.0023286	ENST00000377694	IGFBPL1	http://www.ebi.ac.uk/enright-srv/microcosm/cgi-bin/targets/v5/detail_view.pl?transcript_id=ENST00000377694
hsa-miR-10b-3p	MIMAT0004556	hsa-miR-10b*	16.97	0.0025314	ENST00000322831	ZCCHC7	http://www.ebi.ac.uk/enright-srv/microcosm/cgi-bin/targets/v5/detail_view.pl?transcript_id=ENST00000322831
hsa-miR-10b-3p	MIMAT0004556	hsa-miR-10b*	16.46	0.03	ENST00000340291	SPAG8	http://www.ebi.ac.uk/enright-srv/microcosm/cgi-bin/targets/v5/detail_view.pl?transcript_id=ENST00000340291
hsa-miR-105-3p	MIMAT0004516	hsa-miR-105*	16.14	0.02	ENST00000342694	NPR2	http://www.ebi.ac.uk/enright-srv/microcosm/cgi-bin/targets/v5/detail_view.pl?transcript_id=ENST00000342694
hsa-miR-10b-3p	MIMAT0004556	hsa-miR-10b*	17.56	0.01	ENST00000314888	TLN1	http://www.ebi.ac.uk/enright-srv/microcosm/cgi-bin/targets/v5/detail_view.pl?transcript_id=ENST00000314888
hsa-miR-10b-3p	MIMAT0004556	hsa-miR-10b*	17.55	0.01	ENST00000378192	TLN1	http://www.ebi.ac.uk/enright-srv/microcosm/cgi-bin/targets/v5/detail_view.pl?transcript_id=ENST00000378192
hsa-miR-105-3p	MIMAT0004516	hsa-miR-105*	16.01	0.03	ENST00000378395	C9orf100	http://www.ebi.ac.uk/enright-srv/microcosm/cgi-bin/targets/v5/detail_view.pl?transcript_id=ENST00000378395
hsa-miR-10b-3p	MIMAT0004556	hsa-miR-10b*	16.31	0.03	ENST00000378406	CCDC107	http://www.ebi.ac.uk/enright-srv/microcosm/cgi-bin/targets/v5/detail_view.pl?transcript_id=ENST00000378406
hsa-miR-10b-3p	MIMAT0004556	hsa-miR-10b*	16.83	0.02	ENST00000378409	CCDC107	http://www.ebi.ac.uk/enright-srv/microcosm/cgi-bin/targets/v5/detail_view.pl?transcript_id=ENST00000378409
hsa-miR-105-3p	MIMAT0004516	hsa-miR-105*	15.69	0.04	ENST00000378800	CCL19	http://www.ebi.ac.uk/enright-srv/microcosm/cgi-bin/targets/v5/detail_view.pl?transcript_id=ENST00000378800
hsa-miR-105-3p	MIMAT0004516	hsa-miR-105*	16.14	0.02	ENST00000297613	C9orf23	http://www.ebi.ac.uk/enright-srv/microcosm/cgi-bin/targets/v5/detail_view.pl?transcript_id=ENST00000297613
hsa-miR-105-3p	MIMAT0004516	hsa-miR-105*	16.12	0.02	ENST00000378980	CNTFR	http://www.ebi.ac.uk/enright-srv/microcosm/cgi-bin/targets/v5/detail_view.pl?transcript_id=ENST00000378980
hsa-miR-105-3p	MIMAT0004516	hsa-miR-105*	15.78	0.03	ENST00000319250	C9orf48	http://www.ebi.ac.uk/enright-srv/microcosm/cgi-bin/targets/v5/detail_view.pl?transcript_id=ENST00000319250
hsa-miR-10b-3p	MIMAT0004556	hsa-miR-10b*	16.14	0.04	ENST00000379455	null	http://www.ebi.ac.uk/enright-srv/microcosm/cgi-bin/targets/v5/detail_view.pl?transcript_id=ENST00000379455
hsa-miR-10b-3p	MIMAT0004556	hsa-miR-10b*	16.62	0.02	ENST00000379462	null	http://www.ebi.ac.uk/enright-srv/microcosm/cgi-bin/targets/v5/detail_view.pl?transcript_id=ENST00000379462
hsa-miR-105-3p	MIMAT0004516	hsa-miR-105*	15.93	0.03	ENST00000379521	NFX1	http://www.ebi.ac.uk/enright-srv/microcosm/cgi-bin/targets/v5/detail_view.pl?transcript_id=ENST00000379521
hsa-miR-10b-3p	MIMAT0004556	hsa-miR-10b*	16.98	0.01	ENST00000332247	Q8N7I0_HUMAN	http://www.ebi.ac.uk/enright-srv/microcosm/cgi-bin/targets/v5/detail_view.pl?transcript_id=ENST00000332247
hsa-miR-10b-3p	MIMAT0004556	hsa-miR-10b*	16.6	0.02	ENST00000304425	Q8WTY6_HUMAN	http://www.ebi.ac.uk/enright-srv/microcosm/cgi-bin/targets/v5/detail_view.pl?transcript_id=ENST00000304425
hsa-miR-10b-3p	MIMAT0004556	hsa-miR-10b*	16.38	0.03	ENST00000380424	DENND4C	http://www.ebi.ac.uk/enright-srv/microcosm/cgi-bin/targets/v5/detail_view.pl?transcript_id=ENST00000380424
hsa-miR-10b-3p	MIMAT0004556	hsa-miR-10b*	16.48	0.03	ENST00000380464	ADFP	http://www.ebi.ac.uk/enright-srv/microcosm/cgi-bin/targets/v5/detail_view.pl?transcript_id=ENST00000380464
hsa-miR-105-3p	MIMAT0004516	hsa-miR-105*	15.34	0.0039544	ENST00000380559	ADAMTSL1	http://www.ebi.ac.uk/enright-srv/microcosm/cgi-bin/targets/v5/detail_view.pl?transcript_id=ENST00000380559
hsa-miR-105-3p	MIMAT0004516	hsa-miR-105*	15.03	0.0039544	ENST00000380559	ADAMTSL1	http://www.ebi.ac.uk/enright-srv/microcosm/cgi-bin/targets/v5/detail_view.pl?transcript_id=ENST00000380559
hsa-miR-105-3p	MIMAT0004516	hsa-miR-105*	16.82	0.01	ENST00000276935	ADAMTSL1	http://www.ebi.ac.uk/enright-srv/microcosm/cgi-bin/targets/v5/detail_view.pl?transcript_id=ENST00000276935
hsa-miR-10b-3p	MIMAT0004556	hsa-miR-10b*	16.14	0.04	ENST00000327883	ADAMTSL1	http://www.ebi.ac.uk/enright-srv/microcosm/cgi-bin/targets/v5/detail_view.pl?transcript_id=ENST00000327883
hsa-miR-10b-3p	MIMAT0004556	hsa-miR-10b*	16.52	0.0029347	ENST00000380924	NFIB	http://www.ebi.ac.uk/enright-srv/microcosm/cgi-bin/targets/v5/detail_view.pl?transcript_id=ENST00000380924
hsa-miR-10b-3p	MIMAT0004556	hsa-miR-10b*	17.25	0.01	ENST00000380934	NFIB	http://www.ebi.ac.uk/enright-srv/microcosm/cgi-bin/targets/v5/detail_view.pl?transcript_id=ENST00000380934
hsa-miR-10b-3p	MIMAT0004556	hsa-miR-10b*	17.24	0.01	ENST00000380937	NFIB	http://www.ebi.ac.uk/enright-srv/microcosm/cgi-bin/targets/v5/detail_view.pl?transcript_id=ENST00000380937
hsa-miR-10b-3p	MIMAT0004556	hsa-miR-10b*	17.26	0.01	ENST00000380945	NFIB	http://www.ebi.ac.uk/enright-srv/microcosm/cgi-bin/targets/v5/detail_view.pl?transcript_id=ENST00000380945
hsa-miR-10b-3p	MIMAT0004556	hsa-miR-10b*	17.08	0.01	ENST00000380953	NFIB	http://www.ebi.ac.uk/enright-srv/microcosm/cgi-bin/targets/v5/detail_view.pl?transcript_id=ENST00000380953
hsa-miR-105-3p	MIMAT0004516	hsa-miR-105*	15.8	0.03	ENST00000319409	SNRPEL1	http://www.ebi.ac.uk/enright-srv/microcosm/cgi-bin/targets/v5/detail_view.pl?transcript_id=ENST00000319409
hsa-miR-10b-3p	MIMAT0004556	hsa-miR-10b*	16.37	0.03	ENST00000265774	KIAA0020	http://www.ebi.ac.uk/enright-srv/microcosm/cgi-bin/targets/v5/detail_view.pl?transcript_id=ENST00000265774
hsa-miR-10b-3p	MIMAT0004556	hsa-miR-10b*	16.37	0.03	ENST00000382032	KIAA0020	http://www.ebi.ac.uk/enright-srv/microcosm/cgi-bin/targets/v5/detail_view.pl?transcript_id=ENST00000382032
hsa-miR-105-3p	MIMAT0004516	hsa-miR-105*	16.08	0.02	ENST00000382082	KCNV2	http://www.ebi.ac.uk/enright-srv/microcosm/cgi-bin/targets/v5/detail_view.pl?transcript_id=ENST00000382082
hsa-miR-105-3p	MIMAT0004516	hsa-miR-105*	16.82	0.01	ENST00000382183	SMARCA2	http://www.ebi.ac.uk/enright-srv/microcosm/cgi-bin/targets/v5/detail_view.pl?transcript_id=ENST00000382183
hsa-miR-10b-3p	MIMAT0004556	hsa-miR-10b*	16.81	0.02	ENST00000382389	CBWD1	http://www.ebi.ac.uk/enright-srv/microcosm/cgi-bin/targets/v5/detail_view.pl?transcript_id=ENST00000382389
hsa-miR-10b-3p	MIMAT0004556	hsa-miR-10b*	16.14	0.04	ENST00000382404	CBWD1	http://www.ebi.ac.uk/enright-srv/microcosm/cgi-bin/targets/v5/detail_view.pl?transcript_id=ENST00000382404
hsa-miR-10b-3p	MIMAT0004556	hsa-miR-10b*	16.27	0.03	ENST00000312242	ZNF134	http://www.ebi.ac.uk/enright-srv/microcosm/cgi-bin/targets/v5/detail_view.pl?transcript_id=ENST00000312242
hsa-miR-105-3p	MIMAT0004516	hsa-miR-105*	15.54	0.003228	ENST00000332854	ZNF530	http://www.ebi.ac.uk/enright-srv/microcosm/cgi-bin/targets/v5/detail_view.pl?transcript_id=ENST00000332854
hsa-miR-105-3p	MIMAT0004516	hsa-miR-105*	15.13	0.003228	ENST00000332854	ZNF530	http://www.ebi.ac.uk/enright-srv/microcosm/cgi-bin/targets/v5/detail_view.pl?transcript_id=ENST00000332854
hsa-miR-105-3p	MIMAT0004516	hsa-miR-105*	15.8	0.03	ENST00000330619	ZNF470	http://www.ebi.ac.uk/enright-srv/microcosm/cgi-bin/targets/v5/detail_view.pl?transcript_id=ENST00000330619
hsa-miR-105-3p	MIMAT0004516	hsa-miR-105*	16.03	0.03	ENST00000254165	ZSCAN5	http://www.ebi.ac.uk/enright-srv/microcosm/cgi-bin/targets/v5/detail_view.pl?transcript_id=ENST00000254165
hsa-miR-10b-3p	MIMAT0004556	hsa-miR-10b*	16.08	0.04	ENST00000376305	U2AF2	http://www.ebi.ac.uk/enright-srv/microcosm/cgi-bin/targets/v5/detail_view.pl?transcript_id=ENST00000376305
hsa-miR-10b-3p	MIMAT0004556	hsa-miR-10b*	15.74	0.0046945	ENST00000376313	null	http://www.ebi.ac.uk/enright-srv/microcosm/cgi-bin/targets/v5/detail_view.pl?transcript_id=ENST00000376313
hsa-miR-105-3p	MIMAT0004516	hsa-miR-105*	18.76	0.0013826	ENST00000376333	LOC388564	http://www.ebi.ac.uk/enright-srv/microcosm/cgi-bin/targets/v5/detail_view.pl?transcript_id=ENST00000376333
hsa-miR-10b-3p	MIMAT0004556	hsa-miR-10b*	15.34	0.01	ENST00000376350	PTPRH	http://www.ebi.ac.uk/enright-srv/microcosm/cgi-bin/targets/v5/detail_view.pl?transcript_id=ENST00000376350
hsa-miR-10b-3p	MIMAT0004556	hsa-miR-10b*	16.46	0.00051599	ENST00000326848	BRSK1	http://www.ebi.ac.uk/enright-srv/microcosm/cgi-bin/targets/v5/detail_view.pl?transcript_id=ENST00000326848
hsa-miR-10b-3p	MIMAT0004556	hsa-miR-10b*	17.23	0.01	ENST00000310075	EPS8L1	http://www.ebi.ac.uk/enright-srv/microcosm/cgi-bin/targets/v5/detail_view.pl?transcript_id=ENST00000310075
hsa-miR-105-3p	MIMAT0004516	hsa-miR-105*	16.37	0.0026027	ENST00000263437	NLRP2	http://www.ebi.ac.uk/enright-srv/microcosm/cgi-bin/targets/v5/detail_view.pl?transcript_id=ENST00000263437
hsa-miR-105-3p	MIMAT0004516	hsa-miR-105*	15.23	0.0026027	ENST00000263437	NLRP2	http://www.ebi.ac.uk/enright-srv/microcosm/cgi-bin/targets/v5/detail_view.pl?transcript_id=ENST00000263437
hsa-miR-10b-3p	MIMAT0004556	hsa-miR-10b*	16.66	0.0028458	ENST00000326321	KIR2DL1	http://www.ebi.ac.uk/enright-srv/microcosm/cgi-bin/targets/v5/detail_view.pl?transcript_id=ENST00000326321
hsa-miR-10b-3p	MIMAT0004556	hsa-miR-10b*	15.58	0.0028458	ENST00000326321	KIR2DL1	http://www.ebi.ac.uk/enright-srv/microcosm/cgi-bin/targets/v5/detail_view.pl?transcript_id=ENST00000326321
hsa-miR-10b-3p	MIMAT0004556	hsa-miR-10b*	16.15	0.002594	ENST00000339924	KIR2DL1	http://www.ebi.ac.uk/enright-srv/microcosm/cgi-bin/targets/v5/detail_view.pl?transcript_id=ENST00000339924
hsa-miR-10b-3p	MIMAT0004556	hsa-miR-10b*	15.63	0.002594	ENST00000339924	KIR2DL1	http://www.ebi.ac.uk/enright-srv/microcosm/cgi-bin/targets/v5/detail_view.pl?transcript_id=ENST00000339924
hsa-miR-10b-3p	MIMAT0004556	hsa-miR-10b*	16.44	0.0015347	ENST00000360233	KIR2DL1	http://www.ebi.ac.uk/enright-srv/microcosm/cgi-bin/targets/v5/detail_view.pl?transcript_id=ENST00000360233
hsa-miR-10b-3p	MIMAT0004556	hsa-miR-10b*	15.9	0.0015347	ENST00000360233	KIR2DL1	http://www.ebi.ac.uk/enright-srv/microcosm/cgi-bin/targets/v5/detail_view.pl?transcript_id=ENST00000360233
hsa-miR-10b-3p	MIMAT0004556	hsa-miR-10b*	16.77	0.02	ENST00000291860	KIR2DL1	http://www.ebi.ac.uk/enright-srv/microcosm/cgi-bin/targets/v5/detail_view.pl?transcript_id=ENST00000291860
hsa-miR-105-3p	MIMAT0004516	hsa-miR-105*	15.66	0.04	ENST00000376531	TTYH1	http://www.ebi.ac.uk/enright-srv/microcosm/cgi-bin/targets/v5/detail_view.pl?transcript_id=ENST00000376531
hsa-miR-10b-3p	MIMAT0004556	hsa-miR-10b*	20.01	0.00092299	ENST00000301219	LILRA5	http://www.ebi.ac.uk/enright-srv/microcosm/cgi-bin/targets/v5/detail_view.pl?transcript_id=ENST00000301219
hsa-miR-105-3p	MIMAT0004516	hsa-miR-105*	17.28	0.0074045	ENST00000376591	TMC4	http://www.ebi.ac.uk/enright-srv/microcosm/cgi-bin/targets/v5/detail_view.pl?transcript_id=ENST00000376591
hsa-miR-10b-3p	MIMAT0004556	hsa-miR-10b*	16.1	0.04	ENST00000390651	ZNF137	http://www.ebi.ac.uk/enright-srv/microcosm/cgi-bin/targets/v5/detail_view.pl?transcript_id=ENST00000390651
hsa-miR-10b-3p	MIMAT0004556	hsa-miR-10b*	16.1	0.04	ENST00000333303	ZNF137	http://www.ebi.ac.uk/enright-srv/microcosm/cgi-bin/targets/v5/detail_view.pl?transcript_id=ENST00000333303
hsa-miR-10b-3p	MIMAT0004556	hsa-miR-10b*	16.05	0.0011536	ENST00000222115	HAS1	http://www.ebi.ac.uk/enright-srv/microcosm/cgi-bin/targets/v5/detail_view.pl?transcript_id=ENST00000222115
hsa-miR-105-3p	MIMAT0004516	hsa-miR-105*	15.91	0.03	ENST00000221978	NKG7	http://www.ebi.ac.uk/enright-srv/microcosm/cgi-bin/targets/v5/detail_view.pl?transcript_id=ENST00000221978
hsa-miR-10b-3p	MIMAT0004556	hsa-miR-10b*	16.77	0.02	ENST00000262262	CD33	http://www.ebi.ac.uk/enright-srv/microcosm/cgi-bin/targets/v5/detail_view.pl?transcript_id=ENST00000262262
hsa-miR-10b-3p	MIMAT0004556	hsa-miR-10b*	16.48	0.03	ENST00000305628	SIGLEC7	http://www.ebi.ac.uk/enright-srv/microcosm/cgi-bin/targets/v5/detail_view.pl?transcript_id=ENST00000305628
hsa-miR-105-3p	MIMAT0004516	hsa-miR-105*	17.51	0.005724	ENST00000320838	KLK8	http://www.ebi.ac.uk/enright-srv/microcosm/cgi-bin/targets/v5/detail_view.pl?transcript_id=ENST00000320838
hsa-miR-10b-3p	MIMAT0004556	hsa-miR-10b*	16.89	0.02	ENST00000336334	KLK5	http://www.ebi.ac.uk/enright-srv/microcosm/cgi-bin/targets/v5/detail_view.pl?transcript_id=ENST00000336334
hsa-miR-105-3p	MIMAT0004516	hsa-miR-105*	15.66	0.04	ENST00000270632	SPIB	http://www.ebi.ac.uk/enright-srv/microcosm/cgi-bin/targets/v5/detail_view.pl?transcript_id=ENST00000270632
hsa-miR-105-3p	MIMAT0004516	hsa-miR-105*	15.57	0.04	ENST00000263282	GLTSCR1	http://www.ebi.ac.uk/enright-srv/microcosm/cgi-bin/targets/v5/detail_view.pl?transcript_id=ENST00000263282
hsa-miR-10b-3p	MIMAT0004556	hsa-miR-10b*	16.6	0.02	ENST00000006275	TRAPPC6A	http://www.ebi.ac.uk/enright-srv/microcosm/cgi-bin/targets/v5/detail_view.pl?transcript_id=ENST00000006275
hsa-miR-10b-3p	MIMAT0004556	hsa-miR-10b*	16.32	0.0071127	ENST00000316962	CEACAM20	http://www.ebi.ac.uk/enright-srv/microcosm/cgi-bin/targets/v5/detail_view.pl?transcript_id=ENST00000316962
hsa-miR-10b-3p	MIMAT0004556	hsa-miR-10b*	16.71	0.02	ENST00000300809	IRGQ	http://www.ebi.ac.uk/enright-srv/microcosm/cgi-bin/targets/v5/detail_view.pl?transcript_id=ENST00000300809
hsa-miR-10b-3p	MIMAT0004556	hsa-miR-10b*	15.91	0.0018744	ENST00000253435	TEX101	http://www.ebi.ac.uk/enright-srv/microcosm/cgi-bin/targets/v5/detail_view.pl?transcript_id=ENST00000253435
hsa-miR-10b-3p	MIMAT0004556	hsa-miR-10b*	15.8	0.0018744	ENST00000253435	TEX101	http://www.ebi.ac.uk/enright-srv/microcosm/cgi-bin/targets/v5/detail_view.pl?transcript_id=ENST00000253435
hsa-miR-105-3p	MIMAT0004516	hsa-miR-105*	17.1	0.0090577	ENST00000342951	PSG5	http://www.ebi.ac.uk/enright-srv/microcosm/cgi-bin/targets/v5/detail_view.pl?transcript_id=ENST00000342951
hsa-miR-10b-3p	MIMAT0004556	hsa-miR-10b*	16.17	0.04	ENST00000341918	NP_940879.1	http://www.ebi.ac.uk/enright-srv/microcosm/cgi-bin/targets/v5/detail_view.pl?transcript_id=ENST00000341918
hsa-miR-10b-3p	MIMAT0004556	hsa-miR-10b*	16.25	0.03	ENST00000301204	TMEM145	http://www.ebi.ac.uk/enright-srv/microcosm/cgi-bin/targets/v5/detail_view.pl?transcript_id=ENST00000301204
hsa-miR-105-3p	MIMAT0004516	hsa-miR-105*	15.68	0.04	ENST00000222330	GSK3A	http://www.ebi.ac.uk/enright-srv/microcosm/cgi-bin/targets/v5/detail_view.pl?transcript_id=ENST00000222330
hsa-miR-10b-3p	MIMAT0004556	hsa-miR-10b*	15.6	0.0076937	ENST00000292077	POU2F2	http://www.ebi.ac.uk/enright-srv/microcosm/cgi-bin/targets/v5/detail_view.pl?transcript_id=ENST00000292077
hsa-miR-105-3p	MIMAT0004516	hsa-miR-105*	17.73	0.0044233	ENST00000222339	ZNF574	http://www.ebi.ac.uk/enright-srv/microcosm/cgi-bin/targets/v5/detail_view.pl?transcript_id=ENST00000222339
hsa-miR-10b-3p	MIMAT0004556	hsa-miR-10b*	16.48	0.03	ENST00000221999	CEACAM3	http://www.ebi.ac.uk/enright-srv/microcosm/cgi-bin/targets/v5/detail_view.pl?transcript_id=ENST00000221999
hsa-miR-10b-3p	MIMAT0004556	hsa-miR-10b*	16.84	0.02	ENST00000357396	CEACAM3	http://www.ebi.ac.uk/enright-srv/microcosm/cgi-bin/targets/v5/detail_view.pl?transcript_id=ENST00000357396
hsa-miR-10b-3p	MIMAT0004556	hsa-miR-10b*	16.15	0.04	ENST00000221954	CEACAM4	http://www.ebi.ac.uk/enright-srv/microcosm/cgi-bin/targets/v5/detail_view.pl?transcript_id=ENST00000221954
hsa-miR-105-3p	MIMAT0004516	hsa-miR-105*	15.82	0.03	ENST00000221954	CEACAM4	http://www.ebi.ac.uk/enright-srv/microcosm/cgi-bin/targets/v5/detail_view.pl?transcript_id=ENST00000221954
hsa-miR-10b-3p	MIMAT0004556	hsa-miR-10b*	16.84	0.02	ENST00000187608	CEACAM21	http://www.ebi.ac.uk/enright-srv/microcosm/cgi-bin/targets/v5/detail_view.pl?transcript_id=ENST00000187608
hsa-miR-105-3p	MIMAT0004516	hsa-miR-105*	15.8	0.03	ENST00000301173	CYP2S1	http://www.ebi.ac.uk/enright-srv/microcosm/cgi-bin/targets/v5/detail_view.pl?transcript_id=ENST00000301173
hsa-miR-105-3p	MIMAT0004516	hsa-miR-105*	15.72	0.04	ENST00000310054	CYP2S1	http://www.ebi.ac.uk/enright-srv/microcosm/cgi-bin/targets/v5/detail_view.pl?transcript_id=ENST00000310054
hsa-miR-105-3p	MIMAT0004516	hsa-miR-105*	15.85	0.03	ENST00000252909	Q6ZSU1_HUMAN	http://www.ebi.ac.uk/enright-srv/microcosm/cgi-bin/targets/v5/detail_view.pl?transcript_id=ENST00000252909
hsa-miR-10b-3p	MIMAT0004556	hsa-miR-10b*	16.37	0.03	ENST00000356857	SUPT5H	http://www.ebi.ac.uk/enright-srv/microcosm/cgi-bin/targets/v5/detail_view.pl?transcript_id=ENST00000356857
hsa-miR-105-3p	MIMAT0004516	hsa-miR-105*	16.89	0.01	ENST00000221431	SARS2	http://www.ebi.ac.uk/enright-srv/microcosm/cgi-bin/targets/v5/detail_view.pl?transcript_id=ENST00000221431
hsa-miR-105-3p	MIMAT0004516	hsa-miR-105*	16.71	0.01	ENST00000221419	HNRPL	http://www.ebi.ac.uk/enright-srv/microcosm/cgi-bin/targets/v5/detail_view.pl?transcript_id=ENST00000221419
hsa-miR-105-3p	MIMAT0004516	hsa-miR-105*	15.68	0.04	ENST00000337679	YIF1B	http://www.ebi.ac.uk/enright-srv/microcosm/cgi-bin/targets/v5/detail_view.pl?transcript_id=ENST00000337679
hsa-miR-105-3p	MIMAT0004516	hsa-miR-105*	15.79	0.03	ENST00000317566	ZNF527	http://www.ebi.ac.uk/enright-srv/microcosm/cgi-bin/targets/v5/detail_view.pl?transcript_id=ENST00000317566
hsa-miR-105-3p	MIMAT0004516	hsa-miR-105*	15.68	0.04	ENST00000301159	ANTOL_HUMAN	http://www.ebi.ac.uk/enright-srv/microcosm/cgi-bin/targets/v5/detail_view.pl?transcript_id=ENST00000301159
hsa-miR-105-3p	MIMAT0004516	hsa-miR-105*	15.91	0.03	ENST00000222286	GAPDHS	http://www.ebi.ac.uk/enright-srv/microcosm/cgi-bin/targets/v5/detail_view.pl?transcript_id=ENST00000222286
hsa-miR-105-3p	MIMAT0004516	hsa-miR-105*	16.02	0.03	ENST00000270310	FXYD7	http://www.ebi.ac.uk/enright-srv/microcosm/cgi-bin/targets/v5/detail_view.pl?transcript_id=ENST00000270310
hsa-miR-105-3p	MIMAT0004516	hsa-miR-105*	15	0.0042149	ENST00000357324	ATP13A1	http://www.ebi.ac.uk/enright-srv/microcosm/cgi-bin/targets/v5/detail_view.pl?transcript_id=ENST00000357324
hsa-miR-105-3p	MIMAT0004516	hsa-miR-105*	15	0.0042149	ENST00000357324	ATP13A1	http://www.ebi.ac.uk/enright-srv/microcosm/cgi-bin/targets/v5/detail_view.pl?transcript_id=ENST00000357324
hsa-miR-105-3p	MIMAT0004516	hsa-miR-105*	15	0.0042149	ENST00000291503	ATP13A1	http://www.ebi.ac.uk/enright-srv/microcosm/cgi-bin/targets/v5/detail_view.pl?transcript_id=ENST00000291503
hsa-miR-105-3p	MIMAT0004516	hsa-miR-105*	15	0.0042149	ENST00000291503	ATP13A1	http://www.ebi.ac.uk/enright-srv/microcosm/cgi-bin/targets/v5/detail_view.pl?transcript_id=ENST00000291503
hsa-miR-10b-3p	MIMAT0004556	hsa-miR-10b*	16.47	0.0017394	ENST00000252816	LSM4	http://www.ebi.ac.uk/enright-srv/microcosm/cgi-bin/targets/v5/detail_view.pl?transcript_id=ENST00000252816
hsa-miR-105-3p	MIMAT0004516	hsa-miR-105*	16.82	0.01	ENST00000335393	FAM129C	http://www.ebi.ac.uk/enright-srv/microcosm/cgi-bin/targets/v5/detail_view.pl?transcript_id=ENST00000335393
hsa-miR-105-3p	MIMAT0004516	hsa-miR-105*	17.39	0.0065106	ENST00000252603	PGLS	http://www.ebi.ac.uk/enright-srv/microcosm/cgi-bin/targets/v5/detail_view.pl?transcript_id=ENST00000252603
hsa-miR-105-3p	MIMAT0004516	hsa-miR-105*	16.32	0.02	ENST00000252593	BST2	http://www.ebi.ac.uk/enright-srv/microcosm/cgi-bin/targets/v5/detail_view.pl?transcript_id=ENST00000252593
hsa-miR-105-3p	MIMAT0004516	hsa-miR-105*	15.58	0.04	ENST00000389404	GTPBP3	http://www.ebi.ac.uk/enright-srv/microcosm/cgi-bin/targets/v5/detail_view.pl?transcript_id=ENST00000389404
hsa-miR-105-3p	MIMAT0004516	hsa-miR-105*	17.51	0.005724	ENST00000358792	GTPBP3	http://www.ebi.ac.uk/enright-srv/microcosm/cgi-bin/targets/v5/detail_view.pl?transcript_id=ENST00000358792
hsa-miR-105-3p	MIMAT0004516	hsa-miR-105*	16.68	0.01	ENST00000252602	MRPL34	http://www.ebi.ac.uk/enright-srv/microcosm/cgi-bin/targets/v5/detail_view.pl?transcript_id=ENST00000252602
hsa-miR-105-3p	MIMAT0004516	hsa-miR-105*	16.22	0.02	ENST00000359435	NP_001028721.1	http://www.ebi.ac.uk/enright-srv/microcosm/cgi-bin/targets/v5/detail_view.pl?transcript_id=ENST00000359435
hsa-miR-105-3p	MIMAT0004516	hsa-miR-105*	15.23	0.0033158	ENST00000252597	USHBP1	http://www.ebi.ac.uk/enright-srv/microcosm/cgi-bin/targets/v5/detail_view.pl?transcript_id=ENST00000252597
hsa-miR-105-3p	MIMAT0004516	hsa-miR-105*	15.12	0.0033158	ENST00000252597	USHBP1	http://www.ebi.ac.uk/enright-srv/microcosm/cgi-bin/targets/v5/detail_view.pl?transcript_id=ENST00000252597
hsa-miR-10b-3p	MIMAT0004556	hsa-miR-10b*	16.07	0.01	ENST00000263388	NOTCH3	http://www.ebi.ac.uk/enright-srv/microcosm/cgi-bin/targets/v5/detail_view.pl?transcript_id=ENST00000263388
hsa-miR-105-3p	MIMAT0004516	hsa-miR-105*	15.57	0.04	ENST00000221576	C19orf53	http://www.ebi.ac.uk/enright-srv/microcosm/cgi-bin/targets/v5/detail_view.pl?transcript_id=ENST00000221576
hsa-miR-105-3p	MIMAT0004516	hsa-miR-105*	15.91	0.03	ENST00000356861	TNPO2	http://www.ebi.ac.uk/enright-srv/microcosm/cgi-bin/targets/v5/detail_view.pl?transcript_id=ENST00000356861
hsa-miR-10b-3p	MIMAT0004556	hsa-miR-10b*	16.14	0.04	ENST00000270517	ECSIT	http://www.ebi.ac.uk/enright-srv/microcosm/cgi-bin/targets/v5/detail_view.pl?transcript_id=ENST00000270517
hsa-miR-10b-3p	MIMAT0004556	hsa-miR-10b*	16.25	0.03	ENST00000316772	Q9P0D4_HUMAN	http://www.ebi.ac.uk/enright-srv/microcosm/cgi-bin/targets/v5/detail_view.pl?transcript_id=ENST00000316772
hsa-miR-105-3p	MIMAT0004516	hsa-miR-105*	16.19	0.02	ENST00000253031	YIPF2	http://www.ebi.ac.uk/enright-srv/microcosm/cgi-bin/targets/v5/detail_view.pl?transcript_id=ENST00000253031
hsa-miR-10b-3p	MIMAT0004556	hsa-miR-10b*	16.14	0.04	ENST00000301480	ZNF560	http://www.ebi.ac.uk/enright-srv/microcosm/cgi-bin/targets/v5/detail_view.pl?transcript_id=ENST00000301480
hsa-miR-105-3p	MIMAT0004516	hsa-miR-105*	16.23	0.02	ENST00000308682	OR7D4	http://www.ebi.ac.uk/enright-srv/microcosm/cgi-bin/targets/v5/detail_view.pl?transcript_id=ENST00000308682
hsa-miR-10b-3p	MIMAT0004556	hsa-miR-10b*	16.85	0.02	ENST00000270328	ADAMTS10	http://www.ebi.ac.uk/enright-srv/microcosm/cgi-bin/targets/v5/detail_view.pl?transcript_id=ENST00000270328
hsa-miR-105-3p	MIMAT0004516	hsa-miR-105*	15.69	0.04	ENST00000270328	ADAMTS10	http://www.ebi.ac.uk/enright-srv/microcosm/cgi-bin/targets/v5/detail_view.pl?transcript_id=ENST00000270328
hsa-miR-10b-3p	MIMAT0004556	hsa-miR-10b*	16.94	0.00020278	ENST00000252542	SAFB2	http://www.ebi.ac.uk/enright-srv/microcosm/cgi-bin/targets/v5/detail_view.pl?transcript_id=ENST00000252542
hsa-miR-105-3p	MIMAT0004516	hsa-miR-105*	15.64	0.04	ENST00000329113	null	http://www.ebi.ac.uk/enright-srv/microcosm/cgi-bin/targets/v5/detail_view.pl?transcript_id=ENST00000329113
hsa-miR-105-3p	MIMAT0004516	hsa-miR-105*	16.86	0.01	ENST00000381796	Q6ZTZ0_HUMAN	http://www.ebi.ac.uk/enright-srv/microcosm/cgi-bin/targets/v5/detail_view.pl?transcript_id=ENST00000381796
hsa-miR-105-3p	MIMAT0004516	hsa-miR-105*	15.8	0.03	ENST00000316757	APBA3	http://www.ebi.ac.uk/enright-srv/microcosm/cgi-bin/targets/v5/detail_view.pl?transcript_id=ENST00000316757
hsa-miR-10b-3p	MIMAT0004556	hsa-miR-10b*	16.82	0.02	ENST00000359806	TBXA2R	http://www.ebi.ac.uk/enright-srv/microcosm/cgi-bin/targets/v5/detail_view.pl?transcript_id=ENST00000359806
hsa-miR-105-3p	MIMAT0004516	hsa-miR-105*	16.71	0.00097072	ENST00000262953	TLE2	http://www.ebi.ac.uk/enright-srv/microcosm/cgi-bin/targets/v5/detail_view.pl?transcript_id=ENST00000262953
hsa-miR-105-3p	MIMAT0004516	hsa-miR-105*	15.69	0.00097072	ENST00000262953	TLE2	http://www.ebi.ac.uk/enright-srv/microcosm/cgi-bin/targets/v5/detail_view.pl?transcript_id=ENST00000262953
hsa-miR-105-3p	MIMAT0004516	hsa-miR-105*	15.83	0.03	ENST00000307741	THOP1	http://www.ebi.ac.uk/enright-srv/microcosm/cgi-bin/targets/v5/detail_view.pl?transcript_id=ENST00000307741
hsa-miR-10b-3p	MIMAT0004556	hsa-miR-10b*	17.24	0.01	ENST00000215631	GADD45B	http://www.ebi.ac.uk/enright-srv/microcosm/cgi-bin/targets/v5/detail_view.pl?transcript_id=ENST00000215631
hsa-miR-105-3p	MIMAT0004516	hsa-miR-105*	16.71	0.01	ENST00000263621	ELA2	http://www.ebi.ac.uk/enright-srv/microcosm/cgi-bin/targets/v5/detail_view.pl?transcript_id=ENST00000263621
hsa-miR-10b-3p	MIMAT0004556	hsa-miR-10b*	16.91	0.0024128	ENST00000261937	FLT4	http://www.ebi.ac.uk/enright-srv/microcosm/cgi-bin/targets/v5/detail_view.pl?transcript_id=ENST00000261937
hsa-miR-105-3p	MIMAT0004516	hsa-miR-105*	17.13	0.0087733	ENST00000253778	GFPT2	http://www.ebi.ac.uk/enright-srv/microcosm/cgi-bin/targets/v5/detail_view.pl?transcript_id=ENST00000253778
hsa-miR-105-3p	MIMAT0004516	hsa-miR-105*	15.94	0.03	ENST00000341199	C5orf25	http://www.ebi.ac.uk/enright-srv/microcosm/cgi-bin/targets/v5/detail_view.pl?transcript_id=ENST00000341199
hsa-miR-10b-3p	MIMAT0004556	hsa-miR-10b*	16.42	0.00011805	ENST00000265093	ATP6V0E1	http://www.ebi.ac.uk/enright-srv/microcosm/cgi-bin/targets/v5/detail_view.pl?transcript_id=ENST00000265093
hsa-miR-10b-3p	MIMAT0004556	hsa-miR-10b*	15.75	0.0030807	ENST00000343291	DOCK2	http://www.ebi.ac.uk/enright-srv/microcosm/cgi-bin/targets/v5/detail_view.pl?transcript_id=ENST00000343291
hsa-miR-10b-3p	MIMAT0004556	hsa-miR-10b*	15.54	0.0030807	ENST00000343291	DOCK2	http://www.ebi.ac.uk/enright-srv/microcosm/cgi-bin/targets/v5/detail_view.pl?transcript_id=ENST00000343291
hsa-miR-105-3p	MIMAT0004516	hsa-miR-105*	15.92	0.03	ENST00000388904	ODZ2	http://www.ebi.ac.uk/enright-srv/microcosm/cgi-bin/targets/v5/detail_view.pl?transcript_id=ENST00000388904
hsa-miR-105-3p	MIMAT0004516	hsa-miR-105*	15.96	0.03	ENST00000309178	null	http://www.ebi.ac.uk/enright-srv/microcosm/cgi-bin/targets/v5/detail_view.pl?transcript_id=ENST00000309178
hsa-miR-105-3p	MIMAT0004516	hsa-miR-105*	16.16	0.02	ENST00000054650	THAP3	http://www.ebi.ac.uk/enright-srv/microcosm/cgi-bin/targets/v5/detail_view.pl?transcript_id=ENST00000054650
hsa-miR-105-3p	MIMAT0004516	hsa-miR-105*	17.05	0.0095735	ENST00000307896	THAP3	http://www.ebi.ac.uk/enright-srv/microcosm/cgi-bin/targets/v5/detail_view.pl?transcript_id=ENST00000307896
hsa-miR-10b-3p	MIMAT0004556	hsa-miR-10b*	17	0.01	ENST00000324328	C1orf211	http://www.ebi.ac.uk/enright-srv/microcosm/cgi-bin/targets/v5/detail_view.pl?transcript_id=ENST00000324328
hsa-miR-10b-3p	MIMAT0004556	hsa-miR-10b*	16.71	0.02	ENST00000378486	PLCH2	http://www.ebi.ac.uk/enright-srv/microcosm/cgi-bin/targets/v5/detail_view.pl?transcript_id=ENST00000378486
hsa-miR-105-3p	MIMAT0004516	hsa-miR-105*	16.48	0.01	ENST00000378712	MIB2	http://www.ebi.ac.uk/enright-srv/microcosm/cgi-bin/targets/v5/detail_view.pl?transcript_id=ENST00000378712
hsa-miR-105-3p	MIMAT0004516	hsa-miR-105*	16.48	0.01	ENST00000339381	TAS1R3	http://www.ebi.ac.uk/enright-srv/microcosm/cgi-bin/targets/v5/detail_view.pl?transcript_id=ENST00000339381
[truncated: 34,850 more rows]

## Sheet: targetscan
mirbase19	matuacc	mirna_name	genesymbol	genedescription	score	details
[truncated: 15,882 more rows]

## Sheet: summary
mirna_name	genesymbol	miranda	mirbase	targetscan	num_statistcs
hsa-miR-105-3p	AADACL2	0	1	0	1
[truncated: 177,131 more rows]

## Sheet: Intersection
mirna_name	genesymbol	miranda	mirbase	targetscan	num_statistcs
[truncated: 696 more rows]
