# Supplementary material for: miR-195-5p Regulates Hair Follicle Inductivity of Dermal Papilla Cells by Suppressing Wnt/β-Catenin Activation
Source: Biomed Res Int. 2018 Apr 22;2018:4924356. doi: 10.1155/2018/4924356 (PMC5937601; doi:10.1155/2018/4924356)
Supplement: Supplementary 4 — Table S4: GO analysis of target genes of differentially expressed miRNAs. [file 4924356.f4.xls]

## Sheet: up-BP
#Column "GO.ID" stands for the ID of gene ontology term
#Column "Term" stands for the name of gene ontology term
#Column "Ontology" stands for the ontology of GOID belongs to
#Column "Count" stands for the number of DE genes associated with the listed GOID
#Column "Pop.Hits" stands for the number of background population genes associated with the listed GOID
#Column "List.Total" stands for the total number of DE genes
#Column "Pop.Total" stands for the total number of background population genes
#Column "Fold.Enrichment" stands for the Fold Enrichment value of the GOID, it equals (Count/Pop.Hits)/(List.Total/Pop.Total)
#Column "Pvalue" stands for the significance testing value of the GOID
#Column "FDR" stands for the false discovery rate of the GOID, using Benjamini & Hochberg (1995) method
#Column "Enrichment.Score" stands for the Enrichment Score value of the GOID, it equals (-log10(Pvalue))
#Column "GENES" stands for the DE genes associated with the GOID
GO.ID	Term	Ontology	Count	Pop.Hits	List.Total	Pop.Total	Fold.Enrichment	Pvalue	FDR	Enrichment.Score	GENES
GO:0023052	signaling	Biological process	192	4383	454	14742	1.42243	5.33077e-09	1.58746e-05	8.27321	FGFR3//ITPKB//MAP3K5//MAP3K9//CCL5//PPM1L//IRAK1//MAP3K11//MAPK10//TRAF6//PEBP1//HOXA11//SIX1//ECE1//VAMP3//GNAI2//GRM5//ARRB2//IKBKB//MAPK9//LYN//TGFB1I1//TLE4//CPZ//MARK4//TNKS2//PYGO2//ANK3//APBB1//CDS1//DPYSL2//ERBB3//FGB//FGD1//FGF4//FGF14//GABRB1//GNG10//IGSF1//IRS1//BCAM//P2RX4//PIK3CD//PRKRIR//PTPRK//RASA1//RRAD//CCL1//SFRP2//STAT3//TNXB//VLDLR//NSMAF//SH2D2A//TRIP10//TANK//IPO7//GNB5//IL…
GO:0007154	cell communication	Biological process	195	4490	454	14742	1.41023	7.53801e-09	1.58746e-05	8.12274	BECN1//FGFR3//ITPKB//MAP3K5//MAP3K9//CCL5//PPM1L//IRAK1//MAP3K11//MAPK10//TRAF6//NCOA1//PEBP1//HOXA11//SIX1//GNAI2//GRM5//ARRB2//IKBKB//MAPK9//LYN//TGFB1I1//TLE4//CPZ//MARK4//TNKS2//PYGO2//ANK3//APBB1//CDS1//DPYSL2//ERBB3//FGB//FGD1//FGF4//FGF14//GABRB1//GNG10//IGSF1//IRS1//BCAM//P2RX4//PIK3CD//PRKRIR//PTPRK//RASA1//RRAD//CCL1//SFRP2//STAT3//TNXB//VLDLR//NSMAF//SH2D2A//TRIP10//TANK//IPO7//GNB5//I…
GO:0050794	regulation of cellular process	Biological process	290	7509	454	14742	1.25405	1.11741e-08	1.58746e-05	7.95179	KPNA2//SMARCAD1//WEE1//CCNT2//CDK7//CCNK//CCNL1//DDX5//HIVEP1//HOXD8//SMARCA2//SNAI1//STAT3//TLE4//TRAF6//UBE2I//ZNF174//FZD8//HAND1//NCOR2//HDAC9//SPEN//SIRT1//NSD1//ZBTB10//OSR1//HES5//FGFR3//ITPKB//MAP3K5//MAP3K9//CCL5//PPM1L//SMARCA5//GRM5//GNAI2//ADAM9//TAOK2//IRAK1//MAP3K11//MAPK10//NCOA1//DDR1//TSG101//KAZALD1//ECE1//VAMP3//LYN//SOCS1//PEBP1//MINK1//RASA1//CASK//GSK3B//ARRB2//IRS1//IKBKB//…
GO:0050789	regulation of biological process	Biological process	299	7933	454	14742	1.22387	8.18102e-08	8.32715e-05	7.08719	KPNA2//SMARCAD1//WEE1//CCNT2//CDK7//CCNK//CCNL1//DDX5//HIVEP1//HOXD8//SMARCA2//SNAI1//STAT3//TLE4//TRAF6//UBE2I//ZNF174//FZD8//HAND1//NCOR2//HDAC9//SPEN//SIRT1//NSD1//ZBTB10//OSR1//HES5//FGFR3//ITPKB//MAP3K5//MAP3K9//CCL5//PPM1L//SMARCA5//GRM5//GNAI2//ADAM9//TAOK2//IRAK1//MAP3K11//MAPK10//NCOA1//DDR1//TSG101//KAZALD1//HOXA11//SIX1//LYN//UBASH3A//SLC11A1//ECE1//VAMP3//SOCS1//PEBP1//MINK1//RASA1//C…
GO:0065007	biological regulation	Biological process	312	8387	454	14742	1.20795	9.93048e-08	8.32715e-05	7.00303	KPNA2//SMARCAD1//WEE1//CCNT2//CDK7//CCNK//CCNL1//DDX5//HIVEP1//HOXD8//SMARCA2//SNAI1//STAT3//TLE4//TRAF6//UBE2I//ZNF174//FZD8//HAND1//NCOR2//HDAC9//SPEN//SIRT1//NSD1//ZBTB10//OSR1//HES5//FGFR3//ITPKB//MAP3K5//MAP3K9//CCL5//PPM1L//SMARCA5//GRM5//GNAI2//ADAM9//TAOK2//IRAK1//MAP3K11//MAPK10//NCOA1//PEBP1//DDR1//TSG101//KAZALD1//IL1A//HOXA11//SIX1//LYN//PIK3CD//UBASH3A//SLC11A1//P2RX4//ECE1//VAMP3//S…
GO:0009653	anatomical structure morphogenesis	Biological process	96	1847	454	14742	1.68774	1.17229e-07	8.32715e-05	6.93097	RELN//FGF4//PKD1//EPHB2//GJA5//SERPINE1//SAT1//SH2D2A//HAND1//SIRT1//DLL4//ACVR1//PPP3R1//SFRP2//RASA1//QKI//WARS2//AMOT//HOXA11//SIX1//PVRL2//NSD1//SNAI1//STAT3//COL13A1//GSK3B//PRICKLE1//FGFR3//NAB2//HOXA5//E2F5//FGD1//APBB1//APP//ERBB3//MAP2//FZD8//ALS2//RTN4R//DOCK7//AP2A1//RHOB//CACNB2//AP2M1//COL4A3//COL9A3//DPYSL2//L1CAM//MYH11//SCN8A//SEMA3F//SOS2//KLF7//LGI1//SEMA3A//RND1//RPS6KA6//DPYSL…
GO:0007165	signal transduction	Biological process	170	3923	454	14742	1.40712	1.87157e-07	0.000113952	6.72779	FGFR3//ITPKB//MAP3K5//MAP3K9//CCL5//PPM1L//IRAK1//MAP3K11//MAPK10//TRAF6//GNAI2//GRM5//ARRB2//IKBKB//MAPK9//LYN//TGFB1I1//TLE4//CPZ//MARK4//TNKS2//PYGO2//ERBB3//IRS1//GSK3B//PLCB4//RASA1//DGKZ//SOCS1//ASB3//ACVR1//SNX6//RPS6KA6//EIF2AK3//COL4A3//IFNAR2//L1CAM//PIK3CD//AP2A1//AP2M1//SH3KBP1//APP//PTPRK//ADAM9//ZFYVE9//ADRA1B//CCBP2//GNG10//GPR6//GRM3//PTGER3//GNB5//RASD1//GPR125//GNAO1//ADRB1//GAL…
GO:0009966	regulation of signal transduction	Biological process	84	1563	454	14742	1.7451	2.17408e-07	0.000115824	6.66273	IRAK1//MAP3K9//MAP3K11//MAPK10//TRAF6//GRM5//ARRB2//SNX6//APP//MAP3K5//SPAG9//FGD4//RGS2//EIF2AK3//ACVR1//ERBB3//GSK3B//RGS10//SERPINE1//UBE2I//CCL5//LYN//CAT//SFRP2//TGFB1I1//SIRT1//BAMBI//HES5//DDIT4//IQSEC1//TBC1D10B//RASA1//DOCK4//ALS2//DOCK7//TAOK2//DDX5//FGD1//SOS2//MCF2L//FGD6//FGD5//WWC1//AP2A1//AP2M1//SH3KBP1//FGFR3//SOCS1//IKBKB//IL1A//CC2D1A//TMEM9B//GPR89A//TRIB2//PEBP1//BNIP2//SNAI1/…
GO:0023051	regulation of signaling	Biological process	92	1789	454	14742	1.66985	3.76167e-07	0.000178136	6.42462	IRAK1//MAP3K9//MAP3K11//MAPK10//TRAF6//ECE1//VAMP3//GRM5//ARRB2//SNX6//APP//MAP3K5//SPAG9//FGD4//NEUROD1//RGS2//EIF2AK3//ACVR1//ERBB3//GSK3B//RGS10//SERPINE1//UBE2I//CCL5//LYN//DPYSL2//CAT//SFRP2//TGFB1I1//SIRT1//BAMBI//HES5//C11ORF9//DDIT4//IQSEC1//TBC1D10B//RASA1//DOCK4//ALS2//DOCK7//TAOK2//DDX5//FGD1//SOS2//MCF2L//FGD6//FGD5//WWC1//AP2A1//AP2M1//SH3KBP1//FGFR3//SOCS1//IKBKB//IL1A//CC2D1A//TMEM…
GO:0048468	cell development	Biological process	71	1292	454	14742	1.78442	1.00747e-06	0.000429383	5.99677	RELN//PVRL2//ACVR1//SEMA3F//GSK3B//PPP3R1//SNAI1//SFRP2//EIF2AK3//PEBP1//STRBP//APBB1//APP//ERBB3//MAP2//FZD8//ALS2//RTN4R//DOCK7//AP2A1//RHOB//CACNB2//AP2M1//COL4A3//COL9A3//DPYSL2//EPHB2//L1CAM//MYH11//SCN8A//SOS2//KLF7//LGI1//SEMA3A//RND1//RPS6KA6//DPYSL5//NTN4//HOXA1//TGFB1I1//BAMBI//HPN//HOXA11//LYN//C11ORF9//HES5//FGF4//LHX8//ACTC1//OMG//GNAO1//VAMP3//VSX1//SIX1//BNIP2//NEUROD1//CCL5//SPAG9…
GO:0010647	positive regulation of cell communication	Biological process	44	669	454	14742	2.13564	1.70708e-06	0.000661417	5.76775	EIF2AK3//CCL5//CAT//ERBB3//BECN1//SIRT1//TGFB1I1//HES5//TAOK2//UBE2I//DDX5//ALS2//FGFR3//LYN//IKBKB//IL1A//IRAK1//TRAF6//CC2D1A//TMEM9B//GPR89A//BNIP2//SPAG9//WWC1//PEBP1//ECE1//STAT3//MAP3K11//MINK1//ITPKB//IRS1//LGI1//L1CAM//P2RX4//RELN//SLC24A2//ARRB2//FGF4//ST5//SFRP2//BAMBI//TRPM4//CAPRIN2//TNKS2
GO:0023056	positive regulation of signaling	Biological process	44	675	454	14742	2.11665	2.16012e-06	0.000736434	5.66552	ECE1//VAMP3//EIF2AK3//CCL5//CAT//ERBB3//TGFB1I1//HES5//TAOK2//UBE2I//DDX5//ALS2//FGFR3//LYN//IKBKB//IL1A//IRAK1//TRAF6//CC2D1A//TMEM9B//GPR89A//BNIP2//SPAG9//WWC1//PEBP1//STAT3//MAP3K11//MINK1//ITPKB//IRS1//SIRT1//LGI1//L1CAM//P2RX4//RELN//SLC24A2//ARRB2//FGF4//ST5//SFRP2//BAMBI//TRPM4//CAPRIN2//TNKS2
GO:0006464	protein modification process	Biological process	107	2267	454	14742	1.53261	2.24628e-06	0.000736434	5.64854	CCNT2//CDK7//CCNK//CCNL1//GRM5//GNAI2//MAP3K5//ADAM9//TAOK2//IRAK1//MAP3K9//MAP3K11//MAPK10//TRAF6//ARIH2//CHFR//TNKS2//FBXL14//FKBP1B//FKBP3//LYN//SOCS1//PEBP1//FZD8//SIRT1//SNX6//ARRB2//UBE2I//BIRC6//MARCH4//TRIM9//ACVR1//APP//CDK9//EPHB2//GSK3B//IKBKB//PIK3CD//CCL5//MAP3K12//STK17B//EIF2AK3//FASTK//RPS6KA6//STK39//MINK1//PBK//MARK4//TRIB2//PPP3R1//PPP6C//PTPN2//PTPN4//PTPN13//PTPRK//MTMR3//PPM…
GO:0044260	cellular macromolecule metabolic process	Biological process	240	6231	454	14742	1.2507	2.51082e-06	0.000758593	5.60018	SIRT1//KPNA2//SMARCAD1//CHAF1A//REV1//POLN//CCNT2//CDK7//CCNK//CCNL1//DDX5//HIVEP1//HOXD8//SMARCA2//SNAI1//STAT3//TLE4//TRAF6//UBE2I//ZNF174//FZD8//HAND1//NCOR2//HDAC9//SPEN//NSD1//ZBTB10//OSR1//HES5//SMARCA5//PAN3//GRM5//GNAI2//MAP3K5//ADAM9//TAOK2//IRAK1//MAP3K9//MAP3K11//MAPK10//ARIH2//CHFR//TNKS2//FBXL14//CRNKL1//TNKS1BP1//SRRM1//CSTF2//PNN//SYNCRIP//DNAJC8//PPIL3//YTHDC1//FKBP1B//FKBP3//NCOA…
GO:0031323	regulation of cellular metabolic process	Biological process	177	4287	454	14742	1.34067	2.66985e-06	0.000758593	5.57351	KPNA2//SMARCAD1//CCNT2//CDK7//CCNK//CCNL1//DDX5//HIVEP1//HOXD8//SMARCA2//SNAI1//STAT3//TLE4//TRAF6//UBE2I//ZNF174//FZD8//HAND1//NCOR2//HDAC9//SPEN//SIRT1//NSD1//ZBTB10//OSR1//HES5//SMARCA5//GRM5//GNAI2//MAP3K5//ADAM9//TAOK2//IRAK1//MAP3K9//MAP3K11//MAPK10//NCOA1//ECE1//VAMP3//LYN//SOCS1//PEBP1//SNX6//ESCO1//CDK9//ARID1A//APBB1//ARID3A//E2F5//HOXB6//IGSF1//INSM1//MYBL2//NHLH2//OTX1//PDE8A//PNN//RF…
GO:0010646	regulation of cell communication	Biological process	69	1292	454	14742	1.73415	4.0009e-06	0.00106574	5.39784	GRM5//ARRB2//SNX6//NEUROD1//EIF2AK3//ACVR1//ERBB3//GSK3B//RGS10//CCL5//LYN//DPYSL2//CAT//BECN1//SIRT1//RGS2//SFRP2//TGFB1I1//BAMBI//HES5//C11ORF9//DDIT4//TAOK2//UBE2I//DDX5//ALS2//AP2A1//AP2M1//SH3KBP1//FGFR3//SOCS1//IKBKB//IL1A//IRAK1//TRAF6//CC2D1A//TMEM9B//GPR89A//PEBP1//BNIP2//SPAG9//WWC1//SNAI1//ECE1//STAT3//MAP3K11//MINK1//ITPKB//RASA1//DGKZ//AHSG//IRS1//GRM3//PXK//GNAI2//LGI1//L1CAM//P2RX4…
GO:0009987	cellular process	Biological process	419	12597	454	14742	1.08006	4.43302e-06	0.00109764	5.3533	SIRT1//KPNA2//SMARCAD1//KIF23//TRIP11//BECN1//SLC11A1//CHAF1A//REV1//POLN//UBE2I//WEE1//CCNT2//CDK7//CCNK//CCNL1//E2F5//MAP3K11//ACVR1//PPP6C//CUL2//MARK4//APP//MASTL//RANBP2//CENPQ//GCLC//TST//DDX5//HIVEP1//HOXD8//SMARCA2//SNAI1//STAT3//TLE4//TRAF6//ZNF174//FZD8//HAND1//NCOR2//HDAC9//SPEN//NSD1//ZBTB10//OSR1//HES5//FGFR3//ITPKB//MAP3K5//MAP3K9//CCL5//PPM1L//SMARCA5//PAN3//GRM5//GNAI2//ADAM9//TAO…
GO:0051171	regulation of nitrogen compound metabolic process	Biological process	146	3406	454	14742	1.3919	4.63574e-06	0.00109764	5.33388	KPNA2//SMARCAD1//DDX5//HIVEP1//HOXD8//SMARCA2//SNAI1//STAT3//TLE4//TRAF6//UBE2I//ZNF174//FZD8//HAND1//NCOR2//HDAC9//SPEN//SIRT1//NSD1//ZBTB10//OSR1//HES5//SMARCA5//NCOA1//ESCO1//CDK9//ARID1A//APBB1//CCNT2//ARID3A//E2F5//GRM5//HOXB6//IGSF1//INSM1//MAP3K9//MYBL2//NHLH2//OTX1//PDE8A//PNN//RFX2//SIX1//ZNF3//ZNF207//CCNK//CHAF1A//MORF4L1//ASCC3//WWC1//ZNF521//CHD5//EPC2//EIF2C2//ATAD2//UHRF1//GRHL1//V…
GO:0019219	regulation of nucleobase-containing compound metabolic process	Biological process	143	3325	454	14742	1.39651	5.12965e-06	0.00113403	5.28991	KPNA2//SMARCAD1//DDX5//HIVEP1//HOXD8//SMARCA2//SNAI1//STAT3//TLE4//TRAF6//UBE2I//ZNF174//FZD8//HAND1//NCOR2//HDAC9//SPEN//SIRT1//NSD1//ZBTB10//OSR1//HES5//SMARCA5//NCOA1//ESCO1//CDK9//ARID1A//APBB1//CCNT2//ARID3A//E2F5//GRM5//HOXB6//IGSF1//INSM1//MAP3K9//MYBL2//NHLH2//OTX1//PDE8A//PNN//RFX2//SIX1//ZNF3//ZNF207//CCNK//CHAF1A//MORF4L1//ASCC3//WWC1//ZNF521//CHD5//EPC2//EIF2C2//ATAD2//UHRF1//GRHL1//V…
GO:0032989	cellular component morphogenesis	Biological process	52	888	454	14742	1.90148	5.82063e-06	0.00113403	5.23503	RELN//PVRL2//GSK3B//PPP3R1//SNAI1//APBB1//APP//ERBB3//MAP2//FZD8//ALS2//RTN4R//DOCK7//AP2A1//RHOB//CACNB2//AP2M1//COL4A3//COL9A3//DPYSL2//EPHB2//L1CAM//MYH11//SCN8A//SEMA3F//SOS2//KLF7//LGI1//SEMA3A//RND1//RPS6KA6//DPYSL5//NTN4//HOXA1//FGD1//HPN//RASA1//TAOK2//BAMBI//SH3KBP1//FGD6//FGD4//FGD5//TGFB1I1//SFRP2//ACTC1//OMG//VAMP3//TTC8//WEE1//MINK1//CAPRIN2
GO:0000904	cell morphogenesis involved in differentiation	Biological process	41	634	454	14742	2.09988	5.93257e-06	0.00113403	5.22676	GSK3B//PPP3R1//SNAI1//APBB1//APP//ERBB3//MAP2//FZD8//ALS2//RTN4R//DOCK7//AP2A1//RHOB//CACNB2//AP2M1//COL4A3//COL9A3//DPYSL2//EPHB2//L1CAM//MYH11//RELN//SCN8A//SEMA3F//SOS2//KLF7//LGI1//SEMA3A//RND1//RPS6KA6//DPYSL5//NTN4//HOXA1//TGFB1I1//BAMBI//HPN//SFRP2//VAMP3//OMG//MINK1//CAPRIN2
GO:0000902	cell morphogenesis	Biological process	50	843	454	14742	1.92594	6.28922e-06	0.00113403	5.2014	RELN//GSK3B//PPP3R1//SNAI1//APBB1//APP//ERBB3//MAP2//FZD8//ALS2//RTN4R//DOCK7//AP2A1//RHOB//CACNB2//AP2M1//COL4A3//COL9A3//DPYSL2//EPHB2//L1CAM//MYH11//SCN8A//SEMA3F//SOS2//KLF7//LGI1//SEMA3A//RND1//RPS6KA6//DPYSL5//NTN4//HOXA1//FGD1//HPN//RASA1//TAOK2//BAMBI//SH3KBP1//FGD6//FGD4//FGD5//TGFB1I1//SFRP2//OMG//VAMP3//TTC8//WEE1//MINK1//CAPRIN2
GO:0006793	phosphorus metabolic process	Biological process	75	1464	454	14742	1.66349	6.50927e-06	0.00113403	5.18647	CCNT2//CDK7//CCNK//CCNL1//GRM5//GNAI2//MAP3K5//ADAM9//TAOK2//IRAK1//MAP3K9//MAP3K11//MAPK10//TRAF6//LYN//SOCS1//PEBP1//FZD8//SIRT1//SNX6//NDUFA8//ACVR1//APP//CDK9//EPHB2//GSK3B//IKBKB//PIK3CD//CCL5//MAP3K12//STK17B//EIF2AK3//FASTK//RPS6KA6//STK39//MINK1//PBK//BIRC6//MARK4//TRIB2//PPP3R1//PPP6C//PTPN2//PTPN4//PTPN13//PTPRK//MTMR3//PPM1L//DGKZ//SPAG9//FGD4//MAPK9//MASTL//PKD1//MAP2//FGFR3//RELN//WE…
GO:0006796	phosphate-containing compound metabolic process	Biological process	75	1464	454	14742	1.66349	6.50927e-06	0.00113403	5.18647	CCNT2//CDK7//CCNK//CCNL1//GRM5//GNAI2//MAP3K5//ADAM9//TAOK2//IRAK1//MAP3K9//MAP3K11//MAPK10//TRAF6//LYN//SOCS1//PEBP1//FZD8//SIRT1//SNX6//NDUFA8//ACVR1//APP//CDK9//EPHB2//GSK3B//IKBKB//PIK3CD//CCL5//MAP3K12//STK17B//EIF2AK3//FASTK//RPS6KA6//STK39//MINK1//PBK//BIRC6//MARK4//TRIB2//PPP3R1//PPP6C//PTPN2//PTPN4//PTPN13//PTPRK//MTMR3//PPM1L//DGKZ//SPAG9//FGD4//MAPK9//MASTL//PKD1//MAP2//FGFR3//RELN//WE…
GO:0009967	positive regulation of signal transduction	Biological process	41	637	454	14742	2.08999	6.652e-06	0.00113403	5.17705	CCL5//CAT//ERBB3//TGFB1I1//HES5//TAOK2//UBE2I//DDX5//ALS2//FGFR3//LYN//IKBKB//IL1A//IRAK1//TRAF6//CC2D1A//TMEM9B//GPR89A//BNIP2//SPAG9//WWC1//PEBP1//ECE1//STAT3//MAP3K11//MINK1//ITPKB//IRS1//SIRT1//L1CAM//P2RX4//RELN//ARRB2//FGF4//ST5//SFRP2//BAMBI//TRPM4//CAPRIN2//TNKS2//EIF2AK3
GO:0048583	regulation of response to stimulus	Biological process	98	2080	454	14742	1.5299	7.4445e-06	0.00119968	5.12816	IRAK1//MAP3K9//MAP3K11//MAPK10//TRAF6//GRM5//ARRB2//IKBKB//MAPK9//LYN//CCL5//TRPM4//SIRT1//SLC11A1//PVRL2//SNX6//CDK9//APP//MAP3K5//SPAG9//FGD4//RGS2//EIF2AK3//ACVR1//ERBB3//GSK3B//RGS10//SERPINE1//UBE2I//CAT//BECN1//PIK3CD//SFRP2//TGFB1I1//BAMBI//HES5//PTGER3//DDIT4//IQSEC1//TBC1D10B//RASA1//DOCK4//ALS2//DOCK7//TAOK2//DDX5//FGD1//SOS2//MCF2L//FGD6//FGD5//WWC1//AP2A1//AP2M1//SH3KBP1//FGFR3//SOCS1…
GO:0044267	cellular protein metabolic process	Biological process	130	2974	454	14742	1.41939	7.60001e-06	0.00119968	5.11919	CCNT2//CDK7//CCNK//CCNL1//GRM5//GNAI2//MAP3K5//ADAM9//TAOK2//IRAK1//MAP3K9//MAP3K11//MAPK10//TRAF6//ARIH2//CHFR//TNKS2//FBXL14//FKBP1B//FKBP3//LYN//SOCS1//PEBP1//FZD8//SIRT1//PPID//RANBP2//VBP1//DNAJC8//SACS//PPIL3//SNX6//ARRB2//UBE2I//BIRC6//MARCH4//TRIM9//EIF4G2//SRP14//EIF5B//TNIP1//EIF2C2//APP//RGS2//QKI//METAP1//TNRC6A//CARS//WARS2//PAM//TSG101//SEPHS1//NAGPA//ACVR1//CDK9//EPHB2//GSK3B//IKBK…
GO:0051716	cellular response to stimulus	Biological process	190	4754	454	14742	1.29776	8.16956e-06	0.00120829	5.0878	SIRT1//BECN1//FGFR3//ITPKB//MAP3K5//MAP3K9//CCL5//PPM1L//IRAK1//MAP3K11//MAPK10//TRAF6//NCOA1//CDK7//MORF4L1//ZFYVE26//GNAI2//GRM5//ARRB2//IKBKB//MAPK9//TRPM4//LYN//PIK3CD//TGFB1I1//TLE4//CPZ//MARK4//TNKS2//PYGO2//ANK3//APBB1//CDS1//DPYSL2//ERBB3//FGB//FGD1//FGF4//FGF14//GABRB1//GNG10//IGSF1//IRS1//BCAM//P2RX4//PRKRIR//PTPRK//RASA1//RRAD//CCL1//SFRP2//STAT3//TNXB//VLDLR//NSMAF//SH2D2A//TRIP10//TA…
GO:0043412	macromolecule modification	Biological process	108	2360	454	14742	1.48598	8.32749e-06	0.00120829	5.07949	CCNT2//CDK7//CCNK//CCNL1//GRM5//GNAI2//MAP3K5//ADAM9//TAOK2//IRAK1//MAP3K9//MAP3K11//MAPK10//TRAF6//ARIH2//CHFR//TNKS2//FBXL14//FKBP1B//FKBP3//LYN//SOCS1//PEBP1//FZD8//SIRT1//SNX6//ARRB2//UBE2I//BIRC6//MARCH4//TRIM9//TRDMT1//PAM//TSG101//SEPHS1//NAGPA//ACVR1//APP//CDK9//EPHB2//GSK3B//IKBKB//PIK3CD//CCL5//MAP3K12//STK17B//EIF2AK3//FASTK//RPS6KA6//STK39//MINK1//PBK//MARK4//TRIB2//PPP3R1//PPP6C//PTP…
GO:0048519	negative regulation of biological process	Biological process	125	2838	454	14742	1.4302	8.5051e-06	0.00120829	5.07032	WEE1//DDX5//HIVEP1//HOXD8//SMARCA2//SNAI1//STAT3//TLE4//TRAF6//UBE2I//ZNF174//FZD8//HAND1//NCOR2//HDAC9//SPEN//SIRT1//NSD1//ZBTB10//OSR1//HES5//SMARCA5//SLC11A1//LYN//PEBP1//RASA1//CASK//GRM5//ARRB2//PKD1//SNX6//BNIP2//GCLC//IKBKB//IL1A//IRAK1//PAFAH2//BECN1//AVEN//BIRC6//MAP2//APBB1//CDK7//EIF4G2//TSG101//CUL2//RPRM//CHFR//ERBB3//RND1//ADAM22//MIA3//GNAI2//GALR1//GRM3//DDR1//COL4A3//PRKRIR//PTPR…
GO:0080090	regulation of primary metabolic process	Biological process	171	4197	454	14742	1.32299	1.06701e-05	0.00146697	4.97183	KPNA2//SMARCAD1//CCNT2//CDK7//CCNK//CCNL1//DDX5//HIVEP1//HOXD8//SMARCA2//SNAI1//STAT3//TLE4//TRAF6//UBE2I//ZNF174//FZD8//HAND1//NCOR2//HDAC9//SPEN//SIRT1//NSD1//ZBTB10//OSR1//HES5//SMARCA5//GRM5//GNAI2//MAP3K5//ADAM9//TAOK2//IRAK1//MAP3K9//MAP3K11//MAPK10//NCOA1//LYN//SOCS1//PEBP1//SNX6//ESCO1//CDK9//ARID1A//APBB1//ARID3A//E2F5//HOXB6//IGSF1//INSM1//MYBL2//NHLH2//OTX1//PDE8A//PNN//RFX2//SIX1//ZNF…
GO:0007243	intracellular protein kinase cascade	Biological process	45	743	454	14742	1.96664	1.11682e-05	0.00148747	4.95201	FGFR3//ITPKB//MAP3K5//MAP3K9//CCL5//PPM1L//IKBKB//TRAF6//TANK//SNIP1//FGF14//IRAK1//MAP3K11//MAPK9//MAPK10//MAP3K12//MINK1//SPAG9//FGD4//IFNAR2//PKD1//STAT3//SOCS1//LYN//TAOK2//HES5//IL1A//CC2D1A//TMEM9B//GPR89A//SIRT1//PEBP1//BNIP2//WWC1//IRS1//SFRP2//DOT1L//NEUROD1//RPS6KA6//ARRB2//FGF4//ST5//ADRA1B//GNAI2//STK17B
GO:0006468	protein phosphorylation	Biological process	60	1106	454	14742	1.76156	1.15619e-05	0.00149324	4.93697	CCNT2//CDK7//CCNK//CCNL1//GRM5//GNAI2//MAP3K5//ADAM9//TAOK2//IRAK1//MAP3K9//MAP3K11//MAPK10//TRAF6//LYN//SOCS1//PEBP1//FZD8//SIRT1//SNX6//TRIB2//EIF2AK3//APP//DGKZ//IKBKB//SPAG9//FGD4//MAPK9//CCL5//MAP3K12//GSK3B//PKD1//MAP2//EPHB2//FGFR3//RELN//WEE1//SLC11A1//SFRP2//CAPRIN2//DOCK7//DDR1//HES5//RGS2//VLDLR//ALS2//MINK1//STK33//EHD4//ERBB3//ACVR1//CDK9//PIK3CD//STK17B//FASTK//RPS6KA6//STK39//PBK//…
GO:0048523	negative regulation of cellular process	Biological process	115	2594	454	14742	1.43956	1.69349e-05	0.00212284	4.77122	WEE1//DDX5//HIVEP1//HOXD8//SMARCA2//SNAI1//STAT3//TLE4//TRAF6//UBE2I//ZNF174//FZD8//HAND1//NCOR2//HDAC9//SPEN//SIRT1//NSD1//ZBTB10//OSR1//HES5//SMARCA5//LYN//PEBP1//RASA1//CASK//GRM5//ARRB2//PKD1//SNX6//BNIP2//GCLC//IKBKB//IL1A//IRAK1//PAFAH2//BECN1//AVEN//BIRC6//MAP2//APBB1//CDK7//EIF4G2//TSG101//CUL2//RPRM//CHFR//ERBB3//RND1//ADAM22//MIA3//GNAI2//GALR1//GRM3//DDR1//COL4A3//PRKRIR//PTPRK//SFRP2/…
GO:0040011	locomotion	Biological process	60	1123	454	14742	1.73489	1.82925e-05	0.0022275	4.73773	ACVR1//SEMA3F//RELN//CCL5//TRPM4//PIK3CD//MIA3//CCBP2//L1CAM//CCL1//AMOT//AP2A1//RHOB//CACNB2//AP2M1//COL4A3//COL9A3//DPYSL2//EPHB2//GSK3B//MYH11//SCN8A//SOS2//KLF7//LGI1//SEMA3A//RND1//RPS6KA6//DPYSL5//NTN4//HOXA1//DDR1//SERPINE1//APP//HOXA5//PTPRK//DGKZ//TAOK2//WWC1//BAMBI//SH3KBP1//CTHRC1//PVRL2//JAG2//LAMA3//MINK1//IRS1//SNAI1//SPAG9//SFRP2//GRM5//DLL4//FAP//LYN//SLC7A10//SIX1//ADAM9//ARRB2//…
GO:0035556	intracellular signal transduction	Biological process	88	1855	454	14742	1.54042	1.90173e-05	0.00225143	4.72085	FGFR3//ITPKB//MAP3K5//MAP3K9//CCL5//PPM1L//RPS6KA6//ADRA1B//GNAO1//ADRB1//GALR1//GNAI2//GRM3//GRM5//EIF2AK3//MAP3K12//STK17B//MINK1//IKBKB//TRAF6//TANK//SNIP1//IRAK1//FGF14//MAP3K11//MAPK9//MAPK10//SPAG9//FGD4//IFNAR2//PKD1//STAT3//SOCS1//NEUROD1//RASD1//RHOB//FGD1//RRAD//SOS2//TRIP10//RAB32//RAB21//MCF2L//RAB38//RND1//DEPDC1B//RHEBL1//ARL10//LYN//FKBP1B//ERBB3//IRS1//PIK3CD//CAT//GSK3B//SIRT1//D…
GO:0016310	phosphorylation	Biological process	65	1256	454	14742	1.68044	2.15971e-05	0.00248776	4.6656	CCNT2//CDK7//CCNK//CCNL1//GRM5//GNAI2//MAP3K5//ADAM9//TAOK2//IRAK1//MAP3K9//MAP3K11//MAPK10//TRAF6//LYN//SOCS1//PEBP1//FZD8//SIRT1//SNX6//NDUFA8//ACVR1//APP//CDK9//EPHB2//GSK3B//IKBKB//PIK3CD//CCL5//MAP3K12//STK17B//EIF2AK3//FASTK//RPS6KA6//STK39//MINK1//PBK//BIRC6//MARK4//TRIB2//DGKZ//SPAG9//FGD4//MAPK9//PKD1//MAP2//FGFR3//RELN//WEE1//SLC11A1//SFRP2//CAPRIN2//DOCK7//DDR1//AHSG//IRS1//HES5//RGS2/…
GO:2000112	regulation of cellular macromolecule biosynthetic process	Biological process	130	3039	454	14742	1.38904	2.27448e-05	0.00255101	4.64312	DDX5//HIVEP1//HOXD8//SMARCA2//SNAI1//STAT3//TLE4//TRAF6//UBE2I//ZNF174//FZD8//HAND1//NCOR2//HDAC9//SPEN//SIRT1//NSD1//ZBTB10//OSR1//HES5//SMARCA5//NCOA1//ESCO1//ARID1A//APBB1//CCNT2//CDK9//ARID3A//E2F5//GRM5//HOXB6//IGSF1//INSM1//MAP3K9//MYBL2//NHLH2//OTX1//PDE8A//PNN//RFX2//SIX1//ZNF3//ZNF207//CCNK//CHAF1A//MORF4L1//ASCC3//WWC1//ZNF521//CHD5//EPC2//EIF2C2//ATAD2//UHRF1//GRHL1//VSX1//SFMBT1//CC2D…
GO:0048812	neuron projection morphogenesis	Biological process	35	537	454	14742	2.11638	2.47618e-05	0.00270602	4.60622	APBB1//APP//ERBB3//MAP2//FZD8//ALS2//RTN4R//DOCK7//AP2A1//RHOB//CACNB2//AP2M1//COL4A3//COL9A3//DPYSL2//EPHB2//GSK3B//L1CAM//MYH11//RELN//SCN8A//SEMA3F//SOS2//KLF7//LGI1//SEMA3A//RND1//RPS6KA6//DPYSL5//NTN4//HOXA1//OMG//MINK1//CAPRIN2//WEE1
GO:0031326	regulation of cellular biosynthetic process	Biological process	138	3279	454	14742	1.36659	2.59094e-05	0.00276065	4.58654	DDX5//HIVEP1//HOXD8//SMARCA2//SNAI1//STAT3//TLE4//TRAF6//UBE2I//ZNF174//FZD8//HAND1//NCOR2//HDAC9//SPEN//SIRT1//NSD1//ZBTB10//OSR1//HES5//SMARCA5//NCOA1//ESCO1//ARID1A//APBB1//CCNT2//CDK9//ARID3A//E2F5//GRM5//HOXB6//IGSF1//INSM1//MAP3K9//MYBL2//NHLH2//OTX1//PDE8A//PNN//RFX2//SIX1//ZNF3//ZNF207//CCNK//CHAF1A//MORF4L1//ASCC3//WWC1//ZNF521//CHD5//EPC2//EIF2C2//ATAD2//UHRF1//GRHL1//VSX1//SFMBT1//CC2D…
GO:0007399	nervous system development	Biological process	77	1590	454	14742	1.57251	3.52183e-05	0.00366099	4.45323	STAT3//RELN//SFRP2//PRICKLE1//APBB1//APP//ERBB3//MAP2//FZD8//ALS2//RTN4R//DOCK7//AP2A1//RHOB//CACNB2//AP2M1//COL4A3//COL9A3//DPYSL2//EPHB2//GSK3B//L1CAM//MYH11//SCN8A//SEMA3F//SOS2//KLF7//LGI1//SEMA3A//RND1//RPS6KA6//DPYSL5//NTN4//NHLH2//PAM//IL1RAPL2//ADAM22//PEBP1//PYGO2//HES5//HOXA1//CLDN11//JAG2//LYN//C11ORF9//NAB2//PKD1//VLDLR//HOXD10//NEUROD1//NCOA1//LHX8//AHSG//GNAO1//OTX1//OMG//EIF2AK3//V…
GO:0010556	regulation of macromolecule biosynthetic process	Biological process	131	3099	454	14742	1.37262	3.74415e-05	0.00379942	4.42665	DDX5//HIVEP1//HOXD8//SMARCA2//SNAI1//STAT3//TLE4//TRAF6//UBE2I//ZNF174//FZD8//HAND1//NCOR2//HDAC9//SPEN//SIRT1//NSD1//ZBTB10//OSR1//HES5//SMARCA5//NCOA1//ESCO1//ARID1A//APBB1//CCNT2//CDK9//ARID3A//E2F5//GRM5//HOXB6//IGSF1//INSM1//MAP3K9//MYBL2//NHLH2//OTX1//PDE8A//PNN//RFX2//SIX1//ZNF3//ZNF207//CCNK//CHAF1A//MORF4L1//ASCC3//WWC1//ZNF521//CHD5//EPC2//EIF2C2//ATAD2//UHRF1//GRHL1//VSX1//SFMBT1//CC2D…
GO:0009889	regulation of biosynthetic process	Biological process	138	3307	454	14742	1.35502	3.99769e-05	0.00396236	4.39819	DDX5//HIVEP1//HOXD8//SMARCA2//SNAI1//STAT3//TLE4//TRAF6//UBE2I//ZNF174//FZD8//HAND1//NCOR2//HDAC9//SPEN//SIRT1//NSD1//ZBTB10//OSR1//HES5//SMARCA5//NCOA1//ESCO1//ARID1A//APBB1//CCNT2//CDK9//ARID3A//E2F5//GRM5//HOXB6//IGSF1//INSM1//MAP3K9//MYBL2//NHLH2//OTX1//PDE8A//PNN//RFX2//SIX1//ZNF3//ZNF207//CCNK//CHAF1A//MORF4L1//ASCC3//WWC1//ZNF521//CHD5//EPC2//EIF2C2//ATAD2//UHRF1//GRHL1//VSX1//SFMBT1//CC2D…
GO:0019222	regulation of metabolic process	Biological process	185	4717	454	14742	1.27352	4.12556e-05	0.00399617	4.38452	KPNA2//SMARCAD1//CCNT2//CDK7//CCNK//CCNL1//DDX5//HIVEP1//HOXD8//SMARCA2//SNAI1//STAT3//TLE4//TRAF6//UBE2I//ZNF174//FZD8//HAND1//NCOR2//HDAC9//SPEN//SIRT1//NSD1//ZBTB10//OSR1//HES5//SMARCA5//GRM5//GNAI2//MAP3K5//ADAM9//TAOK2//IRAK1//MAP3K9//MAP3K11//MAPK10//NCOA1//ECE1//VAMP3//LYN//SOCS1//PEBP1//ADRB1//SNX6//ESCO1//CDK9//TRDMT1//ARID1A//EED//APBB1//ARID3A//E2F5//HOXB6//IGSF1//INSM1//MYBL2//NHLH2//…
GO:0060255	regulation of macromolecule metabolic process	Biological process	161	3998	454	14742	1.30763	4.62153e-05	0.00437711	4.33521	KPNA2//SMARCAD1//CCNT2//CDK7//CCNK//CCNL1//DDX5//HIVEP1//HOXD8//SMARCA2//SNAI1//STAT3//TLE4//TRAF6//UBE2I//ZNF174//FZD8//HAND1//NCOR2//HDAC9//SPEN//SIRT1//NSD1//ZBTB10//OSR1//HES5//SMARCA5//GRM5//GNAI2//MAP3K5//ADAM9//TAOK2//IRAK1//MAP3K9//MAP3K11//MAPK10//NCOA1//ECE1//VAMP3//LYN//SOCS1//PEBP1//SNX6//ESCO1//CDK9//TRDMT1//ARID1A//EED//APBB1//ARID3A//E2F5//HOXB6//IGSF1//INSM1//MYBL2//NHLH2//OTX1//P…
GO:0048667	cell morphogenesis involved in neuron differentiation	Biological process	34	532	454	14742	2.07524	4.80451e-05	0.00445148	4.31835	APBB1//APP//ERBB3//MAP2//FZD8//ALS2//RTN4R//DOCK7//AP2A1//RHOB//CACNB2//AP2M1//COL4A3//COL9A3//DPYSL2//EPHB2//GSK3B//L1CAM//MYH11//RELN//SCN8A//SEMA3F//SOS2//KLF7//LGI1//SEMA3A//RND1//RPS6KA6//DPYSL5//NTN4//HOXA1//OMG//MINK1//CAPRIN2
GO:0007409	axonogenesis	Biological process	32	490	454	14742	2.12058	5.32989e-05	0.00471188	4.27328	AP2A1//RHOB//CACNB2//AP2M1//COL4A3//COL9A3//DPYSL2//EPHB2//GSK3B//L1CAM//MYH11//RELN//SCN8A//SEMA3F//SOS2//KLF7//LGI1//SEMA3A//RND1//RPS6KA6//DPYSL5//NTN4//HOXA1//APP//OMG//RTN4R//APBB1//ERBB3//MAP2//FZD8//ALS2//DOCK7
GO:0048699	generation of neurons	Biological process	52	964	454	14742	1.75157	5.42717e-05	0.00471188	4.26543	STAT3//RELN//APBB1//APP//ERBB3//MAP2//FZD8//ALS2//RTN4R//DOCK7//AP2A1//RHOB//CACNB2//AP2M1//COL4A3//COL9A3//DPYSL2//EPHB2//GSK3B//L1CAM//MYH11//SCN8A//SEMA3F//SOS2//KLF7//LGI1//SEMA3A//RND1//RPS6KA6//DPYSL5//NTN4//HOXA1//JAG2//LYN//HOXD10//LHX8//OMG//GNAO1//NEUROD1//HES5//VSX1//SIX1//BNIP2//CCL5//SPAG9//GRM5//WEE1//MINK1//DLL4//SPEN//CAPRIN2//CTHRC1
GO:0030182	neuron differentiation	Biological process	49	890	454	14742	1.78775	5.44276e-05	0.00471188	4.26418	STAT3//APBB1//APP//ERBB3//MAP2//FZD8//ALS2//RTN4R//DOCK7//AP2A1//RHOB//CACNB2//AP2M1//COL4A3//COL9A3//DPYSL2//EPHB2//GSK3B//L1CAM//MYH11//RELN//SCN8A//SEMA3F//SOS2//KLF7//LGI1//SEMA3A//RND1//RPS6KA6//DPYSL5//NTN4//HOXA1//JAG2//LYN//HOXD10//LHX8//OMG//GNAO1//NEUROD1//HES5//VSX1//SIX1//BNIP2//CCL5//SPAG9//WEE1//MINK1//CAPRIN2//CTHRC1
GO:0048731	system development	Biological process	130	3095	454	14742	1.3639	5.52778e-05	0.00471188	4.25745	AHSG//FGFR3//GJA5//HOXA11//HOXD10//JAG2//EIF2AK3//FGF4//PKD1//EPHB2//SERPINE1//SAT1//SH2D2A//HAND1//SIRT1//DLL4//ACVR1//PPP3R1//SFRP2//RASA1//QKI//WARS2//AMOT//OSR1//STAT3//SEMA3F//SIX1//RELN//PIK3CD//PYGO2//GSK3B//SNAI1//PRICKLE1//STOX2//FZD8//COL13A1//NAB2//LYN//ERBB3//NEUROD1//E2F5//FGD1//DPYSL2//FGF14//GJB1//HOXA1//L1CAM//SCN2A//SCN8A//SMARCA2//VLDLR//ARID1A//LGI1//SEMA3A//TRIM3//DPYSL5//MARK…
GO:0022008	neurogenesis	Biological process	54	1021	454	14742	1.71739	6.53271e-05	0.0054593	4.18491	STAT3//RELN//APBB1//APP//ERBB3//MAP2//FZD8//ALS2//RTN4R//DOCK7//AP2A1//RHOB//CACNB2//AP2M1//COL4A3//COL9A3//DPYSL2//EPHB2//GSK3B//L1CAM//MYH11//SCN8A//SEMA3F//SOS2//KLF7//LGI1//SEMA3A//RND1//RPS6KA6//DPYSL5//NTN4//HOXA1//JAG2//LYN//C11ORF9//HES5//NAB2//HOXD10//LHX8//OMG//GNAO1//NEUROD1//VSX1//SIX1//BNIP2//CCL5//SPAG9//GRM5//WEE1//MINK1//DLL4//SPEN//CAPRIN2//CTHRC1
GO:0048522	positive regulation of cellular process	Biological process	120	2821	454	14742	1.38127	6.98827e-05	0.00563209	4.15563	NCOA1//ECE1//VAMP3//FZD8//SIRT1//GSK3B//IRS1//MIA3//PVRL2//ARID1A//APP//COL4A3//STK17B//ADRB1//GALR1//FGF4//FGFR3//GNAI2//LYN//SFRP2//TBC1D8//BAMBI//DERL2//TRPM4//CDCA7L//BIRC6//MARK4//HES5//FGD1//MAP3K5//SOS2//TRAF6//FASTK//MCF2L//FGD4//PPP3R1//CUL2//EIF2AK3//P2RX4//CCL5//SNAI1//TGFB1I1//HOXA11//MAPK9//HOXA5//DPYSL2//CAT//ERBB3//BECN1//ACVR1//APBB1//C11ORF9//CDK7//HNF4G//IKBKB//IRAK1//NEUROD1//S…
GO:0043170	macromolecule metabolic process	Biological process	252	6871	454	14742	1.19092	7.00377e-05	0.00563209	4.15467	SIRT1//KPNA2//SMARCAD1//CHAF1A//REV1//POLN//CCNT2//CDK7//CCNK//CCNL1//DDX5//HIVEP1//HOXD8//SMARCA2//SNAI1//STAT3//TLE4//TRAF6//UBE2I//ZNF174//FZD8//HAND1//NCOR2//HDAC9//SPEN//NSD1//ZBTB10//OSR1//HES5//SMARCA5//PAN3//GRM5//GNAI2//MAP3K5//ADAM9//TAOK2//IRAK1//MAP3K9//MAP3K11//MAPK10//ARIH2//CHFR//TNKS2//FBXL14//CRNKL1//TNKS1BP1//SRRM1//CSTF2//PNN//SYNCRIP//DNAJC8//PPIL3//YTHDC1//FKBP1B//FKBP3//NCOA…
GO:0044238	primary metabolic process	Biological process	297	8366	454	14742	1.15276	8.00313e-05	0.00631654	4.09674	SIRT1//KPNA2//SMARCAD1//CHAF1A//REV1//POLN//CCNT2//CDK7//CCNK//CCNL1//GCLC//TST//DDX5//HIVEP1//HOXD8//SMARCA2//SNAI1//STAT3//TLE4//TRAF6//UBE2I//ZNF174//FZD8//HAND1//NCOR2//HDAC9//SPEN//NSD1//ZBTB10//OSR1//HES5//SMARCA5//PAN3//GRM5//GNAI2//MAP3K5//ADAM9//TAOK2//IRAK1//MAP3K9//MAP3K11//MAPK10//ARIH2//CHFR//TNKS2//FBXL14//CRNKL1//TNKS1BP1//SRRM1//CSTF2//PNN//SYNCRIP//DNAJC8//PPIL3//YTHDC1//FKBP1B//…
GO:0044237	cellular metabolic process	Biological process	292	8211	454	14742	1.15475	9.2677e-05	0.00704368	4.03303	SIRT1//KPNA2//SMARCAD1//BECN1//CHAF1A//REV1//POLN//CCNT2//CDK7//CCNK//CCNL1//GCLC//TST//DDX5//HIVEP1//HOXD8//SMARCA2//SNAI1//STAT3//TLE4//TRAF6//UBE2I//ZNF174//FZD8//HAND1//NCOR2//HDAC9//SPEN//NSD1//ZBTB10//OSR1//HES5//SMARCA5//PAN3//GRM5//GNAI2//MAP3K5//ADAM9//TAOK2//IRAK1//MAP3K9//MAP3K11//MAPK10//ARIH2//CHFR//TNKS2//FBXL14//CRNKL1//TNKS1BP1//SRRM1//CSTF2//PNN//SYNCRIP//DNAJC8//PPIL3//YTHDC1//F…
GO:0048869	cellular developmental process	Biological process	110	2554	454	14742	1.39853	9.49414e-05	0.00704368	4.02254	RELN//RASA1//QKI//WARS2//AMOT//SNAI1//PVRL2//STAT3//ACVR1//SEMA3F//HOXA11//SIX1//PIK3CD//HAND1//GSK3B//PPP3R1//FGFR3//OSR1//SFRP2//EIF2AK3//NEUROD1//PEBP1//STRBP//APBB1//APP//ERBB3//MAP2//FZD8//ALS2//RTN4R//DOCK7//AP2A1//RHOB//CACNB2//AP2M1//COL4A3//COL9A3//DPYSL2//EPHB2//L1CAM//MYH11//SCN8A//SOS2//KLF7//LGI1//SEMA3A//RND1//RPS6KA6//DPYSL5//NTN4//HOXA1//FGD1//HPN//TAOK2//BAMBI//SH3KBP1//FGD6//FGD…
GO:0007254	JNK cascade	Biological process	15	156	454	14742	3.12225	9.55946e-05	0.00704368	4.01957	MAP3K9//MAP3K11//MAP3K5//SPAG9//FGD4//MAPK9//MAPK10//IRAK1//TRAF6//SFRP2//IL1A//TAOK2//MINK1//FGF14//MAP3K12
GO:0051252	regulation of RNA metabolic process	Biological process	122	2899	454	14742	1.36651	9.58548e-05	0.00704368	4.01839	DDX5//HIVEP1//HOXD8//SMARCA2//SNAI1//STAT3//TLE4//TRAF6//UBE2I//ZNF174//FZD8//HAND1//NCOR2//HDAC9//SPEN//SIRT1//NSD1//ZBTB10//OSR1//HES5//SMARCA5//NCOA1//ARID1A//APBB1//CCNT2//CDK9//ARID3A//E2F5//GRM5//HOXB6//IGSF1//INSM1//MAP3K9//MYBL2//NHLH2//OTX1//PDE8A//PNN//RFX2//SIX1//ZNF3//ZNF207//CCNK//CHAF1A//MORF4L1//ASCC3//WWC1//ZNF521//CHD5//EPC2//EIF2C2//ATAD2//UHRF1//GRHL1//VSX1//SFMBT1//CC2D1A//CDC…
GO:0048518	positive regulation of biological process	Biological process	129	3104	454	14742	1.34949	9.83774e-05	0.00710651	4.0071	NCOA1//HOXA11//SIX1//SLC11A1//ECE1//VAMP3//FZD8//SIRT1//GSK3B//ADRA1B//ADRB1//IRS1//IKBKB//IRAK1//MAPK9//MAPK10//TRAF6//LYN//MIA3//PVRL2//ARID1A//APP//COL4A3//STK17B//GALR1//FGF4//FGFR3//GNAI2//SFRP2//TBC1D8//BAMBI//DERL2//TRPM4//CDCA7L//BIRC6//MARK4//HES5//FGD1//MAP3K5//SOS2//FASTK//MCF2L//FGD4//PPP3R1//CUL2//EIF2AK3//P2RX4//CCL5//IL1A//HPN//QKI//OSR1//SNAI1//TGFB1I1//HOXA5//DPYSL2//CAT//ERBB3//…
GO:0048666	neuron development	Biological process	41	721	454	14742	1.8465	0.000113877	0.00799376	3.94356	APBB1//APP//ERBB3//MAP2//FZD8//ALS2//RTN4R//DOCK7//AP2A1//RHOB//CACNB2//AP2M1//COL4A3//COL9A3//DPYSL2//EPHB2//GSK3B//L1CAM//MYH11//RELN//SCN8A//SEMA3F//SOS2//KLF7//LGI1//SEMA3A//RND1//RPS6KA6//DPYSL5//NTN4//HOXA1//LYN//LHX8//OMG//GNAO1//VSX1//WEE1//MINK1//HOXD10//CAPRIN2//CTHRC1
GO:0032990	cell part morphogenesis	Biological process	37	626	454	14742	1.91923	0.000114411	0.00799376	3.94153	APBB1//APP//ERBB3//MAP2//FZD8//ALS2//RTN4R//DOCK7//AP2A1//RHOB//CACNB2//AP2M1//COL4A3//COL9A3//DPYSL2//EPHB2//GSK3B//L1CAM//MYH11//RELN//SCN8A//SEMA3F//SOS2//KLF7//LGI1//SEMA3A//RND1//RPS6KA6//DPYSL5//NTN4//HOXA1//OMG//TTC8//WEE1//MINK1//CAPRIN2//PVRL2
GO:0000165	MAPK cascade	Biological process	27	400	454	14742	2.19182	0.000118767	0.00816426	3.92531	FGF14//IRAK1//MAP3K5//MAP3K11//MAPK9//MAPK10//TRAF6//MAP3K12//MINK1//MAP3K9//SPAG9//FGD4//TAOK2//PEBP1//BNIP2//FGFR3//WWC1//SFRP2//IL1A//LYN//RPS6KA6//ARRB2//FGF4//ST5//ITPKB//CCL5//PPM1L
GO:0010468	regulation of gene expression	Biological process	132	3208	454	14742	1.3361	0.000124858	0.00844675	3.90358	DDX5//HIVEP1//HOXD8//SMARCA2//SNAI1//STAT3//TLE4//TRAF6//UBE2I//ZNF174//FZD8//HAND1//NCOR2//HDAC9//SPEN//SIRT1//NSD1//ZBTB10//OSR1//HES5//SMARCA5//NCOA1//TRDMT1//ARID1A//EED//APBB1//CCNT2//CDK9//ARID3A//E2F5//GRM5//HOXB6//IGSF1//INSM1//MAP3K9//MYBL2//NHLH2//OTX1//PDE8A//PNN//RFX2//SIX1//ZNF3//ZNF207//CCNK//CHAF1A//MORF4L1//ASCC3//WWC1//ZNF521//CHD5//EPC2//EIF2C2//ATAD2//UHRF1//GRHL1//VSX1//SFMBT1…
GO:2001141	regulation of RNA biosynthetic process	Biological process	119	2832	454	14742	1.36444	0.000129451	0.0086206	3.8879	DDX5//HIVEP1//HOXD8//SMARCA2//SNAI1//STAT3//TLE4//TRAF6//UBE2I//ZNF174//FZD8//HAND1//NCOR2//HDAC9//SPEN//SIRT1//NSD1//ZBTB10//OSR1//HES5//SMARCA5//NCOA1//ARID1A//APBB1//CCNT2//CDK9//ARID3A//E2F5//GRM5//HOXB6//IGSF1//INSM1//MAP3K9//MYBL2//NHLH2//OTX1//PDE8A//PNN//RFX2//SIX1//ZNF3//ZNF207//CCNK//CHAF1A//MORF4L1//ASCC3//WWC1//ZNF521//CHD5//EPC2//EIF2C2//ATAD2//UHRF1//GRHL1//VSX1//SFMBT1//CC2D1A//CDC…
GO:0060485	mesenchyme development	Biological process	14	143	454	14742	3.17901	0.000133984	0.00878522	3.87295	ACVR1//SEMA3F//GSK3B//PPP3R1//SNAI1//ERBB3//TGFB1I1//BAMBI//HPN//SFRP2//HOXA5//SIX1//OSR1//HAND1
GO:0031175	neuron projection development	Biological process	37	632	454	14742	1.90101	0.000138666	0.00895445	3.85803	APBB1//APP//ERBB3//MAP2//FZD8//ALS2//RTN4R//DOCK7//AP2A1//RHOB//CACNB2//AP2M1//COL4A3//COL9A3//DPYSL2//EPHB2//GSK3B//L1CAM//MYH11//RELN//SCN8A//SEMA3F//SOS2//KLF7//LGI1//SEMA3A//RND1//RPS6KA6//DPYSL5//NTN4//HOXA1//LYN//OMG//WEE1//MINK1//CAPRIN2//GNAO1
GO:0051099	positive regulation of binding	Biological process	9	64	454	14742	4.56629	0.000140919	0.00896415	3.85103	EPB41//PKD1//EIF2AK3//BAMBI//CAPRIN2//CTHRC1//UHRF1//NEUROD1//TRAF6
GO:0050793	regulation of developmental process	Biological process	61	1235	454	14742	1.60385	0.000149515	0.00915572	3.82532	HOXA11//SIX1//FGD1//HPN//RASA1//TAOK2//BAMBI//SH3KBP1//FGD6//FGD4//FGD5//SNAI1//TGFB1I1//SFRP2//MAPK9//LYN//COL4A3//HOXA5//AMOT//FGF4//AHSG//ACVR1//OSR1//HES5//EIF2AK3//C11ORF9//ADAM9//NEUROD1//SIRT1//TRIB2//DPYSL2//APP//BNIP2//CCL5//SPAG9//DDX5//LRRC17//TRAF6//NAB2//RHOB//IL1A//SERPINE1//RPS6KA6//LAMA3//ITPKB//GRM5//FGFR3//OMG//HDAC9//SEMA3A//SEMA3F//DLL4//SPEN//RTN4R//CAPRIN2//EPHB2//CTHRC1//NT…
GO:0007411	axon guidance	Biological process	24	341	454	14742	2.28537	0.000150541	0.00915572	3.82235	HOXA1//APP//SEMA3A//SEMA3F//EPHB2//AP2A1//RHOB//CACNB2//AP2M1//COL4A3//COL9A3//DPYSL2//GSK3B//L1CAM//MYH11//RELN//SCN8A//SOS2//KLF7//LGI1//RND1//RPS6KA6//DPYSL5//NTN4
GO:0030030	cell projection organization	Biological process	45	829	454	14742	1.76262	0.000153656	0.00915572	3.81345	APBB1//APP//ERBB3//MAP2//FZD8//ALS2//RTN4R//DOCK7//AP2A1//RHOB//CACNB2//AP2M1//COL4A3//COL9A3//DPYSL2//EPHB2//GSK3B//L1CAM//MYH11//RELN//SCN8A//SEMA3F//SOS2//KLF7//LGI1//SEMA3A//RND1//RPS6KA6//DPYSL5//NTN4//HOXA1//LYN//FGD4//OMG//GNAO1//CCL5//TTC8//PVRL2//FGD1//FGD6//FGD5//WEE1//MINK1//CAPRIN2//CTHRC1
GO:0006935	chemotaxis	Biological process	34	565	454	14742	1.95403	0.000154672	0.00915572	3.81059	CCL5//TRPM4//PIK3CD//AP2A1//RHOB//CACNB2//AP2M1//COL4A3//COL9A3//DPYSL2//EPHB2//GSK3B//L1CAM//MYH11//RELN//SCN8A//SEMA3F//SOS2//KLF7//LGI1//SEMA3A//RND1//RPS6KA6//DPYSL5//NTN4//HOXA1//APP//ARRB2//DOCK4//LYN//SERPINE1//CCBP2//CCL1//AMOT
GO:0042330	taxis	Biological process	34	565	454	14742	1.95403	0.000154672	0.00915572	3.81059	CCL5//TRPM4//PIK3CD//CCBP2//L1CAM//CCL1//AMOT//AP2A1//RHOB//CACNB2//AP2M1//COL4A3//COL9A3//DPYSL2//EPHB2//GSK3B//MYH11//RELN//SCN8A//SEMA3F//SOS2//KLF7//LGI1//SEMA3A//RND1//RPS6KA6//DPYSL5//NTN4//HOXA1//APP//ARRB2//DOCK4//LYN//SERPINE1
GO:0044270	cellular nitrogen compound catabolic process	Biological process	34	567	454	14742	1.94714	0.000165348	0.00965359	3.7816	RHOB//DNM1//GNAI2//GNAO1//GNG10//RRAD//GNB5//RAB21//RAB38//RND1//RASD1//CAT//ACTC1//SMARCA5//DPYSL2//DPYSL5//ENTPD4//HMOX2//TST//TBC1D10B//RASA1//PXK//GSK3B//DOCK4//ALS2//DOCK7//FGD1//FGD6//FGD4//FGD5//BNIP2//RGS2//RGS10//UHRF1
GO:0048858	cell projection morphogenesis	Biological process	36	617	454	14742	1.8946	0.000182343	0.010502	3.73911	APBB1//APP//ERBB3//MAP2//FZD8//ALS2//RTN4R//DOCK7//AP2A1//RHOB//CACNB2//AP2M1//COL4A3//COL9A3//DPYSL2//EPHB2//GSK3B//L1CAM//MYH11//RELN//SCN8A//SEMA3F//SOS2//KLF7//LGI1//SEMA3A//RND1//RPS6KA6//DPYSL5//NTN4//HOXA1//OMG//TTC8//WEE1//MINK1//CAPRIN2
GO:0016043	cellular component organization	Biological process	150	3772	454	14742	1.29128	0.000189821	0.0107869	3.72166	KIF23//BECN1//WEE1//MARK4//DOCK7//RANBP2//CENPQ//CRNKL1//RELN//DDR1//TSG101//TAOK2//KAZALD1//MAP2//PVRL2//GSK3B//PPP3R1//SNAI1//ARRB2//SMARCA5//EPB41//FGD1//TNXB//TRIP10//DAAM1//FGD6//FHOD3//FGD4//FGD5//AMOT//DPYSL2//SH3KBP1//MICAL1//FOXQ1//ARID1A//CHAF1A//SMARCD2//SMARCA2//SIRT1//VAMP3//HES5//TIMM10//AP2A1//APP//DNM1//ZFYVE9//LMBR1L//M6PR//SORL1//VLDLR//AHSG//EHD4//SLC11A1//NPLOC4//TNKS1BP1//RND…
GO:0010628	positive regulation of gene expression	Biological process	50	964	454	14742	1.6842	0.000198518	0.0111327	3.7022	NCOA1//ARID1A//ACVR1//APBB1//C11ORF9//CDK7//HNF4G//HOXA11//IKBKB//IRAK1//NEUROD1//SIX1//SMARCA2//SNAI1//STAT3//TGFB1I1//SMARCA5//KLF7//SPEN//BAMBI//TOX3//SMARCAD1//NSD1//HES5//APP//DDX5//FGF4//HOXA1//HOXA5//HOXD10//IL1A//NHLH2//PKD1//SFRP2//SLC11A1//TRAF6//FZD8//HAND1//CAMTA2//SIRT1//UHRF1//CAPRIN2//FOXQ1//OSR1//PPARGC1B//NPAS4//HPN//MAPK9//CCL5//QKI
GO:0034645	cellular macromolecule biosynthetic process	Biological process	152	3839	454	14742	1.28566	0.000208095	0.0115182	3.68174	CHAF1A//SIRT1//REV1//POLN//DDX5//HIVEP1//HOXD8//SMARCA2//SNAI1//STAT3//TLE4//TRAF6//UBE2I//ZNF174//FZD8//HAND1//NCOR2//HDAC9//SPEN//NSD1//ZBTB10//OSR1//HES5//SMARCA5//NCOA1//CDK7//ARRB2//CCNT2//CDK9//CSTF2//TGFB1I1//CCNK//TRIP11//SRRM1//PGM1//ESCO1//ARID1A//PTGER3//SIX1//APBB1//ARID3A//E2F5//GRM5//HOXB6//IGSF1//INSM1//MAP3K9//MYBL2//NHLH2//OTX1//PDE8A//PNN//RFX2//ZNF3//ZNF207//MORF4L1//ASCC3//WWC…
GO:0030154	cell differentiation	Biological process	103	2408	454	14742	1.38893	0.000222075	0.0121344	3.6535	RELN//RASA1//QKI//WARS2//AMOT//SNAI1//PVRL2//STAT3//ACVR1//SEMA3F//HOXA11//SIX1//PIK3CD//HAND1//GSK3B//PPP3R1//FGFR3//OSR1//SFRP2//EIF2AK3//NEUROD1//PEBP1//STRBP//APBB1//APP//ERBB3//MAP2//FZD8//ALS2//RTN4R//DOCK7//AP2A1//RHOB//CACNB2//AP2M1//COL4A3//COL9A3//DPYSL2//EPHB2//L1CAM//MYH11//SCN8A//SOS2//KLF7//LGI1//SEMA3A//RND1//RPS6KA6//DPYSL5//NTN4//HOXA1//JAG2//TGFB1I1//BAMBI//HPN//MAPK9//LYN//C11O…
GO:0006355	regulation of transcription, DNA-dependent	Biological process	117	2815	454	14742	1.34961	0.00023791	0.0128351	3.62359	DDX5//HIVEP1//HOXD8//SMARCA2//SNAI1//STAT3//TLE4//TRAF6//UBE2I//ZNF174//FZD8//HAND1//NCOR2//HDAC9//SPEN//SIRT1//NSD1//ZBTB10//OSR1//HES5//SMARCA5//NCOA1//ARID1A//HNF4G//IFNAR2//MYCN//OTX1//SMARCD2//KLF7//CAMTA2//MED12L//ZNF367//NAB2//MAF1//ACVR1//APBB1//C11ORF9//CDK7//HOXA11//IKBKB//IRAK1//NEUROD1//SIX1//TGFB1I1//BAMBI//TOX3//SMARCAD1//GCLC//PTPRK//SFRP2//TSG101//EED//RASD1//TSHZ3//SNX6//PRICKLE1…
GO:0019538	protein metabolic process	Biological process	142	3554	454	14742	1.29739	0.000250474	0.0132335	3.60124	CCNT2//CDK7//CCNK//CCNL1//GRM5//GNAI2//MAP3K5//ADAM9//TAOK2//IRAK1//MAP3K9//MAP3K11//MAPK10//TRAF6//ARIH2//CHFR//TNKS2//FBXL14//FKBP1B//FKBP3//LYN//SOCS1//PEBP1//FZD8//SIRT1//PPID//RANBP2//VBP1//DNAJC8//SACS//PPIL3//SNX6//ARRB2//UBE2I//BIRC6//MARCH4//TRIM9//EIF4G2//SRP14//EIF5B//TNIP1//EIF2C2//APP//RGS2//QKI//METAP1//TNRC6A//CARS//WARS2//PAM//TSG101//SEPHS1//NAGPA//ACVR1//CDK9//EPHB2//GSK3B//IKBK…
GO:0007259	JAK-STAT cascade	Biological process	11	100	454	14742	3.57185	0.000251505	0.0132335	3.59945	CCL5//FGFR3//HES5//SOCS1//LYN//DOT1L//NEUROD1//IRS1//STAT3//IFNAR2//PKD1
GO:0007275	multicellular organismal development	Biological process	146	3675	454	14742	1.29002	0.000255754	0.013293	3.59218	AHSG//FGFR3//GJA5//HOXA11//HOXD10//JAG2//EIF2AK3//FGF4//PKD1//EPHB2//SERPINE1//SAT1//SH2D2A//HAND1//SIRT1//DLL4//ACVR1//PPP3R1//SFRP2//RASA1//QKI//WARS2//AMOT//OSR1//SIX1//ALS2//PYGO2//NSD1//SNAI1//STAT3//SEMA3F//RELN//PIK3CD//GSK3B//PRICKLE1//STOX2//FZD8//COL13A1//NAB2//LYN//ERBB3//NEUROD1//SMARCA5//FOXQ1//HOXA5//E2F5//FGD1//DPYSL2//FGF14//GJB1//HOXA1//L1CAM//SCN2A//SCN8A//SMARCA2//VLDLR//ARID1A…
GO:0022603	regulation of anatomical structure morphogenesis	Biological process	31	512	454	14742	1.96604	0.000270753	0.0138583	3.56743	HOXA11//SIX1//FGD1//HPN//RASA1//TAOK2//BAMBI//SH3KBP1//FGD6//FGD4//FGD5//SNAI1//TGFB1I1//SFRP2//COL4A3//HOXA5//AMOT//ADAM9//RHOB//IL1A//SERPINE1//CCL5//OMG//SEMA3A//SEMA3F//RTN4R//CAPRIN2//CTHRC1//NTN4//HDAC9//OSR1
GO:0007166	cell surface receptor signaling pathway	Biological process	94	2166	454	14742	1.40919	0.000273134	0.0138583	3.56362	IRAK1//GNAI2//GRM5//ARRB2//LYN//TGFB1I1//TLE4//CPZ//MARK4//TNKS2//PYGO2//ERBB3//IRS1//ACVR1//PPM1L//SNX6//AP2A1//AP2M1//GSK3B//SH3KBP1//APP//PTPRK//ADAM9//ZFYVE9//ADRA1B//CCBP2//GNG10//GPR6//GRM3//PTGER3//GNB5//RASD1//GPR125//GNAO1//ADRB1//GALR1//DGKZ//PKD1//NXPH2//SORCS3//SORCS1//JAG2//SPEN//DLL4//HES5//ITGB8//IKBKB//MAPK9//MAPK10//TRAF6//RGS2//AP3S1//FGF4//FGFR3//PTPN2//CCL5//EIF4G2//IFNAR2//IL…
GO:0048705	skeletal system morphogenesis	Biological process	14	154	454	14742	2.95194	0.000292017	0.0144914	3.53459	FGF4//PKD1//COL13A1//FGFR3//NAB2//OSR1//SIX1//HOXA1//HOXA5//HOXB6//HOXD10//SFRP2//HOXA11//HOXD8
GO:0007160	cell-matrix adhesion	Biological process	13	136	454	14742	3.10388	0.000292413	0.0144914	3.534	DDR1//MINK1//RASA1//CASK//GSK3B//PKD1//PTPRK//TAOK2//SERPINE1//COL13A1//ITGB8//BCAM//ADAM9
GO:0048856	anatomical structure development	Biological process	140	3510	454	14742	1.29515	0.000307514	0.0149883	3.51214	RELN//AHSG//FGFR3//GJA5//HOXA11//HOXD10//JAG2//EIF2AK3//FGF4//PKD1//EPHB2//SERPINE1//SAT1//SH2D2A//HAND1//SIRT1//DLL4//ACVR1//PPP3R1//SFRP2//RASA1//QKI//WARS2//AMOT//OSR1//SIX1//PVRL2//NSD1//SNAI1//STAT3//SEMA3F//COL13A1//PIK3CD//PYGO2//GSK3B//PRICKLE1//STOX2//FZD8//NAB2//HOXA5//LYN//SLC40A1//ERBB3//NEUROD1//PEBP1//STRBP//HOXA1//E2F5//FGD1//DPYSL2//FGF14//GJB1//L1CAM//SCN2A//SCN8A//SMARCA2//VLDLR…
GO:0006351	transcription, DNA-dependent	Biological process	121	2950	454	14742	1.33188	0.000310269	0.0149883	3.50826	DDX5//HIVEP1//HOXD8//SMARCA2//SNAI1//STAT3//TLE4//TRAF6//UBE2I//ZNF174//FZD8//HAND1//NCOR2//HDAC9//SPEN//SIRT1//NSD1//ZBTB10//OSR1//HES5//SMARCA5//NCOA1//CDK7//ARRB2//CCNT2//CDK9//CSTF2//TGFB1I1//CCNK//TRIP11//SRRM1//ARID1A//APBB1//ARID3A//E2F5//GRM5//HOXB6//IGSF1//INSM1//MAP3K9//MYBL2//NHLH2//OTX1//PDE8A//PNN//RFX2//SIX1//ZNF3//ZNF207//CHAF1A//MORF4L1//ASCC3//WWC1//ZNF521//CHD5//EPC2//EIF2C2//AT…
GO:0032092	positive regulation of protein binding	Biological process	6	31	454	14742	6.28478	0.000315655	0.0149883	3.50079	EPB41//PKD1//EIF2AK3//BAMBI//CAPRIN2//CTHRC1
GO:0034655	nucleobase-containing compound catabolic process	Biological process	32	540	454	14742	1.92423	0.000316505	0.0149883	3.49962	RHOB//DNM1//GNAI2//GNAO1//GNG10//RRAD//GNB5//RAB21//RAB38//RND1//RASD1//CAT//ACTC1//SMARCA5//DPYSL2//DPYSL5//ENTPD4//TBC1D10B//RASA1//PXK//GSK3B//DOCK4//ALS2//DOCK7//FGD1//FGD6//FGD4//FGD5//BNIP2//RGS2//RGS10//UHRF1
GO:0031329	regulation of cellular catabolic process	Biological process	26	403	454	14742	2.09493	0.000321342	0.0150501	3.49303	BECN1//SIRT1//IRS1//TBC1D10B//RASA1//GCLC//TRIB2//PRICKLE1//PXK//GSK3B//DOCK4//ALS2//DOCK7//FGD1//FGD6//FGD4//FGD5//BNIP2//GNAO1//RGS2//RGS10//ADRA1B//DDIT4//ADAM9//USP44//UHRF1
GO:0048584	positive regulation of response to stimulus	Biological process	50	985	454	14742	1.64829	0.000329532	0.0152024	3.4821	IKBKB//IRAK1//MAPK9//MAPK10//TRAF6//LYN//SIRT1//SLC11A1//PVRL2//EIF2AK3//CCL5//CAT//ERBB3//BECN1//PIK3CD//TGFB1I1//HES5//PTGER3//TAOK2//UBE2I//DDX5//ALS2//SERPINE1//FGFR3//IL1A//CC2D1A//TMEM9B//GPR89A//BNIP2//SPAG9//WWC1//PEBP1//ECE1//STAT3//MAP3K11//MINK1//ITPKB//IRS1//L1CAM//P2RX4//UBASH3A//RELN//ARRB2//FGF4//ST5//SFRP2//BAMBI//TRPM4//CAPRIN2//TNKS2
GO:0046700	heterocycle catabolic process	Biological process	33	565	454	14742	1.89656	0.000331727	0.0152024	3.47922	RHOB//DNM1//GNAI2//GNAO1//GNG10//RRAD//GNB5//RAB21//RAB38//RND1//RASD1//CAT//ACTC1//SMARCA5//DPYSL2//DPYSL5//ENTPD4//HMOX2//TBC1D10B//RASA1//PXK//GSK3B//DOCK4//ALS2//DOCK7//FGD1//FGD6//FGD4//FGD5//BNIP2//RGS2//RGS10//UHRF1
GO:0009059	macromolecule biosynthetic process	Biological process	153	3913	454	14742	1.26964	0.000363749	0.0163531	3.4392	CHAF1A//SIRT1//REV1//POLN//DDX5//HIVEP1//HOXD8//SMARCA2//SNAI1//STAT3//TLE4//TRAF6//UBE2I//ZNF174//FZD8//HAND1//NCOR2//HDAC9//SPEN//NSD1//ZBTB10//OSR1//HES5//SMARCA5//NCOA1//CDK7//ARRB2//CCNT2//CDK9//CSTF2//TGFB1I1//CCNK//TRIP11//SRRM1//PGM1//ESCO1//ARID1A//PTGER3//SIX1//APBB1//ARID3A//E2F5//GRM5//HOXB6//IGSF1//INSM1//MAP3K9//MYBL2//NHLH2//OTX1//PDE8A//PNN//RFX2//ZNF3//ZNF207//MORF4L1//ASCC3//WWC…
GO:0071840	cellular component organization or biogenesis	Biological process	152	3883	454	14742	1.27109	0.000364511	0.0163531	3.43829	KIF23//BECN1//WEE1//MARK4//DOCK7//RANBP2//CENPQ//CRNKL1//RELN//DDR1//TSG101//TAOK2//KAZALD1//MAP2//PVRL2//GSK3B//PPP3R1//SNAI1//ARRB2//SMARCA5//EPB41//FGD1//TNXB//TRIP10//DAAM1//FGD6//FHOD3//FGD4//FGD5//AMOT//DPYSL2//SH3KBP1//MICAL1//FOXQ1//ARID1A//CHAF1A//SMARCD2//SMARCA2//SIRT1//WBP11//VAMP3//HES5//TIMM10//AP2A1//APP//DNM1//ZFYVE9//LMBR1L//M6PR//SORL1//VLDLR//AHSG//EHD4//SLC11A1//NPLOC4//TNKS1B…
GO:0080135	regulation of cellular response to stress	Biological process	18	236	454	14742	2.47663	0.000383169	0.0170111	3.41661	CDK9//MAP3K5//MAP3K9//MAP3K11//SPAG9//FGD4//BECN1//SIRT1//TAOK2//IRAK1//TRAF6//SFRP2//DDX5//SNAI1//IL1A//MINK1//OMG//LYN
GO:0006184	GTP catabolic process	Biological process	24	364	454	14742	2.14097	0.000395994	0.0173993	3.40231	TBC1D10B//RASA1//GSK3B//DOCK4//ALS2//DOCK7//FGD1//FGD6//FGD4//FGD5//BNIP2//GNAO1//RGS2//RGS10//RHOB//DNM1//GNAI2//GNG10//RRAD//GNB5//RAB21//RAB38//RND1//RASD1
GO:0031098	stress-activated protein kinase signaling cascade	Biological process	16	198	454	14742	2.62395	0.000423593	0.018422	3.37305	FGF14//IRAK1//MAP3K5//MAP3K11//MAPK9//MAPK10//TRAF6//MAP3K12//MINK1//MAP3K9//SPAG9//FGD4//TAOK2//SFRP2//IL1A//LYN
GO:0008152	metabolic process	Biological process	315	9124	454	14742	1.12105	0.000429633	0.0184959	3.3669	SIRT1//KPNA2//SMARCAD1//BECN1//CHAF1A//REV1//POLN//CCNT2//CDK7//CCNK//CCNL1//GCLC//TST//DDX5//HIVEP1//HOXD8//SMARCA2//SNAI1//STAT3//TLE4//TRAF6//UBE2I//ZNF174//FZD8//HAND1//NCOR2//HDAC9//SPEN//NSD1//ZBTB10//OSR1//HES5//SMARCA5//PAN3//GRM5//GNAI2//MAP3K5//ADAM9//TAOK2//IRAK1//MAP3K9//MAP3K11//MAPK10//ARIH2//CHFR//TNKS2//FBXL14//CRNKL1//TNKS1BP1//SRRM1//CSTF2//PNN//SYNCRIP//DNAJC8//PPIL3//YTHDC1//F…
GO:0032774	RNA biosynthetic process	Biological process	123	3036	454	14742	1.31554	0.00045235	0.0192791	3.34453	DDX5//HIVEP1//HOXD8//SMARCA2//SNAI1//STAT3//TLE4//TRAF6//UBE2I//ZNF174//FZD8//HAND1//NCOR2//HDAC9//SPEN//SIRT1//NSD1//ZBTB10//OSR1//HES5//SMARCA5//NCOA1//CDK7//ARRB2//CCNT2//CDK9//CSTF2//TGFB1I1//CCNK//TRIP11//SRRM1//ARID1A//PTGER3//SIX1//APBB1//ARID3A//E2F5//GRM5//HOXB6//IGSF1//INSM1//MAP3K9//MYBL2//NHLH2//OTX1//PDE8A//PNN//RFX2//ZNF3//ZNF207//CHAF1A//MORF4L1//ASCC3//WWC1//ZNF521//CHD5//EPC2//EI…
GO:0051254	positive regulation of RNA metabolic process	Biological process	48	950	454	14742	1.64066	0.000482606	0.0202366	3.31641	NCOA1//ARID1A//ACVR1//APBB1//C11ORF9//CDK7//HNF4G//HOXA11//IKBKB//IRAK1//NEUROD1//SIX1//SMARCA2//SNAI1//STAT3//TGFB1I1//SMARCA5//KLF7//SPEN//BAMBI//TOX3//SMARCAD1//NSD1//HES5//HPN//APP//DDX5//FGF4//HOXA1//HOXA5//HOXD10//IL1A//NHLH2//PKD1//SFRP2//SLC11A1//TRAF6//FZD8//HAND1//CAMTA2//SIRT1//UHRF1//CAPRIN2//FOXQ1//OSR1//PPARGC1B//NPAS4//CDK9
GO:0045893	positive regulation of transcription, DNA-dependent	Biological process	46	899	454	14742	1.66149	0.000484311	0.0202366	3.31488	NCOA1//ARID1A//APP//CDK7//DDX5//FGF4//HOXA1//HOXA5//HOXD10//IL1A//NEUROD1//NHLH2//PKD1//SFRP2//SIX1//SLC11A1//SMARCA2//STAT3//TRAF6//FZD8//HAND1//CAMTA2//SIRT1//UHRF1//CAPRIN2//FOXQ1//OSR1//PPARGC1B//NPAS4//HES5//ACVR1//APBB1//C11ORF9//HNF4G//HOXA11//IKBKB//IRAK1//SNAI1//TGFB1I1//SMARCA5//KLF7//SPEN//BAMBI//TOX3//SMARCAD1//NSD1
GO:0051173	positive regulation of nitrogen compound metabolic process	Biological process	54	1110	454	14742	1.57969	0.000530595	0.0219553	3.27524	NCOA1//ARID1A//ADRB1//GALR1//ACVR1//APBB1//C11ORF9//CDK7//HNF4G//HOXA11//IKBKB//IRAK1//NEUROD1//SIX1//SMARCA2//SNAI1//STAT3//TGFB1I1//SMARCA5//KLF7//SPEN//BAMBI//TOX3//SMARCAD1//NSD1//HES5//TNKS2//HPN//P2RX4//PTX3//SIRT1//APP//DDX5//FGF4//HOXA1//HOXA5//HOXD10//IL1A//NHLH2//PKD1//SFRP2//SLC11A1//TRAF6//FZD8//HAND1//CAMTA2//UHRF1//CAPRIN2//FOXQ1//OSR1//PPARGC1B//NPAS4//CDK9//PEBP1
GO:0080134	regulation of response to stress	Biological process	35	630	454	14742	1.80396	0.000553989	0.0227029	3.2565	IKBKB//IRAK1//MAPK9//MAPK10//TRAF6//CCL5//PVRL2//CDK9//MAP3K5//MAP3K9//MAP3K11//SPAG9//FGD4//BECN1//SIRT1//SERPINE1//PTGER3//TAOK2//LYN//SFRP2//DDX5//SNAI1//ARRB2//IL1A//MINK1//OMG//AP2A1//AP2M1//IL28RA//AHSG//FAP//PTPN2//SOCS1//IFNAR2//CASK
GO:0046039	GTP metabolic process	Biological process	24	375	454	14742	2.07817	0.000606172	0.0246048	3.2174	RHOB//DNM1//GNAI2//GNAO1//GNG10//RRAD//GNB5//RAB21//RAB38//RND1//RASD1//TBC1D10B//RASA1//GSK3B//DOCK4//ALS2//DOCK7//FGD1//FGD6//FGD4//FGD5//BNIP2//RGS2//RGS10
GO:0065009	regulation of molecular function	Biological process	80	1823	454	14742	1.42496	0.000613398	0.0246632	3.21226	CCNT2//CDK7//CCNK//CCNL1//GRM5//GNAI2//MAP3K5//ADAM9//TAOK2//IRAK1//MAP3K9//MAP3K11//MAPK10//TRAF6//ARRB2//SNX6//TRIB2//COL4A3//EIF2AK3//APP//ADRB1//GALR1//GRM3//DGKZ//SPAG9//FGD4//SERPINE1//UBE2I//FGFR3//RGS2//CCL5//CAST//PKD1//SIRT1//CAT//GSK3B//EPB41//BAMBI//CAPRIN2//CTHRC1//SLC11A1//TBC1D10B//RASA1//SYNGR3//FKBP1B//PXK//DOCK4//ALS2//DOCK7//MASTL//CTSA//PPP1R11//SOCS1//FGD1//FGD6//FGD5//SFRP2/…
GO:0051338	regulation of transferase activity	Biological process	35	634	454	14742	1.79258	0.00062065	0.0247216	3.20715	CCNT2//CDK7//CCNK//CCNL1//GRM5//GNAI2//MAP3K5//ADAM9//TAOK2//IRAK1//MAP3K9//MAP3K11//MAPK10//TRAF6//SNX6//TRIB2//EIF2AK3//APP//DGKZ//SPAG9//FGD4//CCL5//PKD1//SLC11A1//LYN//RGS2//SFRP2//FGFR3//IRS1//RELN//VLDLR//ALS2//ERBB3//GSK3B//SIRT1
GO:0001932	regulation of protein phosphorylation	Biological process	40	758	454	14742	1.71353	0.000628485	0.0247465	3.2017	CCNT2//CDK7//CCNK//CCNL1//GRM5//GNAI2//MAP3K5//ADAM9//TAOK2//IRAK1//MAP3K9//MAP3K11//MAPK10//TRAF6//LYN//PEBP1//FZD8//SIRT1//SNX6//TRIB2//EIF2AK3//APP//DGKZ//SPAG9//FGD4//CCL5//PKD1//SLC11A1//SFRP2//CAPRIN2//DOCK7//FGFR3//HES5//SOCS1//RGS2//RELN//VLDLR//ALS2//EHD4//ERBB3
GO:0019228	regulation of action potential in neuron	Biological process	9	78	454	14742	3.7467	0.000638434	0.0247465	3.19488	CLDN11//C11ORF9//HES5//EIF2AK3//NAB2//SCN2A//SCN8A//QKI//P2RX4
GO:0010648	negative regulation of cell communication	Biological process	32	563	454	14742	1.84562	0.000649111	0.0247465	3.18768	GRM5//ARRB2//SNX6//ACVR1//ERBB3//GSK3B//RGS10//LYN//RGS2//CCL5//SFRP2//TGFB1I1//SIRT1//BAMBI//DDIT4//AP2A1//AP2M1//SH3KBP1//SOCS1//PEBP1//SNAI1//NEUROD1//RASA1//DGKZ//AHSG//IRS1//GNAI2//UBASH3A//SLC24A2//RPS6KA6//CTHRC1//PRICKLE1
GO:0023057	negative regulation of signaling	Biological process	32	563	454	14742	1.84562	0.000649111	0.0247465	3.18768	GRM5//ARRB2//SNX6//ACVR1//ERBB3//GSK3B//RGS10//LYN//RGS2//CCL5//SFRP2//TGFB1I1//SIRT1//BAMBI//DDIT4//AP2A1//AP2M1//SH3KBP1//SOCS1//PEBP1//SNAI1//NEUROD1//RASA1//DGKZ//AHSG//IRS1//GNAI2//UBASH3A//SLC24A2//RPS6KA6//CTHRC1//PRICKLE1
GO:0051239	regulation of multicellular organismal process	Biological process	70	1550	454	14742	1.46645	0.000650306	0.0247465	3.18688	HOXA11//SIX1//LYN//UBASH3A//SLC11A1//ADRA1B//ADRB1//PEBP1//SEMA3A//TSHZ3//TRPM4//TRAF6//CNN1//GNAO1//FKBP1B//IL1A//P2RX4//RGS2//SNAI1//TGFB1I1//BAMBI//HPN//SFRP2//COL4A3//HOXA5//AMOT//ECE1//SERPINE1//ACVR1//AHSG//OSR1//PTGER3//CCL5//HES5//EIF2AK3//C11ORF9//APP//STAT3//TNKS2//TRIB2//DPYSL2//BNIP2//NEUROD1//SPAG9//DDX5//LRRC17//NAB2//RHOB//RPS6KA6//LAMA3//ITPKB//GRM5//OMG//HDAC9//SEMA3F//DLL4//SPEN…
GO:0001944	vasculature development	Biological process	28	469	454	14742	1.93859	0.000661781	0.0248855	3.17929	EPHB2//GJA5//SERPINE1//SAT1//SH2D2A//HAND1//SIRT1//DLL4//ACVR1//PPP3R1//SFRP2//RASA1//QKI//WARS2//AMOT//COL4A3//HOXA5//SMARCA2//SIX1//RHOB//IL1A//CCL5//HOXA1//ITGB8//PKD1//OSR1//HDAC9//FZD8
GO:0006366	transcription from RNA polymerase II promoter	Biological process	58	1227	454	14742	1.53491	0.000668366	0.0248855	3.17499	DDX5//HIVEP1//HOXD8//SMARCA2//SNAI1//STAT3//TLE4//TRAF6//UBE2I//ZNF174//FZD8//HAND1//NCOR2//HDAC9//SPEN//SIRT1//NSD1//ZBTB10//OSR1//HES5//NCOA1//CSTF2//SRRM1//HNF4G//IFNAR2//MYCN//OTX1//SMARCD2//ARID1A//SMARCA5//KLF7//CAMTA2//MED12L//ZNF367//CDK7//CDK9//CCNT2//APP//FGF4//HOXA1//HOXA5//HOXD10//IL1A//NEUROD1//NHLH2//PKD1//SFRP2//SIX1//SLC11A1//UHRF1//CAPRIN2//FOXQ1//PPARGC1B//NPAS4//ARRB2//TGFB1I1/…
GO:0042325	regulation of phosphorylation	Biological process	42	811	454	14742	1.68162	0.000672556	0.0248855	3.17227	CCNT2//CDK7//CCNK//CCNL1//GRM5//GNAI2//MAP3K5//ADAM9//TAOK2//IRAK1//MAP3K9//MAP3K11//MAPK10//TRAF6//LYN//SOCS1//PEBP1//FZD8//SIRT1//SNX6//TRIB2//EIF2AK3//APP//DGKZ//SPAG9//FGD4//CCL5//PKD1//SLC11A1//SFRP2//CAPRIN2//DOCK7//AHSG//IRS1//FGFR3//HES5//RGS2//RELN//VLDLR//ALS2//EHD4//ERBB3
GO:0043408	regulation of MAPK cascade	Biological process	20	290	454	14742	2.2394	0.000679532	0.0248855	3.16779	MAP3K5//MAP3K9//MAP3K11//SPAG9//FGD4//TAOK2//PEBP1//BNIP2//FGFR3//WWC1//IRAK1//TRAF6//SFRP2//IL1A//MINK1//LYN//RPS6KA6//ARRB2//FGF4//ST5
GO:0009166	nucleotide catabolic process	Biological process	30	517	454	14742	1.88422	0.000683155	0.0248855	3.16548	RHOB//DNM1//GNAI2//GNAO1//GNG10//RRAD//GNB5//RAB21//RAB38//RND1//RASD1//CAT//ACTC1//SMARCA5//ENTPD4//TBC1D10B//RASA1//PXK//GSK3B//DOCK4//ALS2//DOCK7//FGD1//FGD6//FGD4//FGD5//BNIP2//RGS2//RGS10//UHRF1
GO:0043393	regulation of protein binding	Biological process	9	79	454	14742	3.69927	0.000701294	0.0252425	3.1541	ARRB2//GSK3B//EPB41//PKD1//EIF2AK3//BAMBI//CAPRIN2//CTHRC1//SPAG9
GO:0010627	regulation of intracellular protein kinase cascade	Biological process	30	518	454	14742	1.88058	0.000704799	0.0252425	3.15193	MAP3K5//MAP3K9//MAP3K11//SPAG9//FGD4//CCL5//LYN//TAOK2//FGFR3//HES5//SOCS1//IKBKB//IL1A//IRAK1//TRAF6//CC2D1A//TMEM9B//GPR89A//SIRT1//PEBP1//BNIP2//WWC1//SFRP2//MINK1//DOT1L//NEUROD1//RPS6KA6//ARRB2//FGF4//ST5
GO:0072358	cardiovascular system development	Biological process	37	689	454	14742	1.74375	0.000728732	0.0256682	3.13743	EPHB2//GJA5//SERPINE1//SAT1//SH2D2A//HAND1//SIRT1//DLL4//ACVR1//PPP3R1//SFRP2//RASA1//QKI//WARS2//AMOT//FZD8//SIX1//ERBB3//ECE1//PAM//PKD1//VLDLR//HDAC9//OSR1//ADRA1B//COL4A3//HOXA5//SMARCA2//RHOB//IL1A//CCL5//MYH11//HOXA1//ACTC1//ITGB8//ADRB1//PRICKLE1
GO:0072359	circulatory system development	Biological process	37	689	454	14742	1.74375	0.000728732	0.0256682	3.13743	EPHB2//GJA5//SERPINE1//SAT1//SH2D2A//HAND1//SIRT1//DLL4//ACVR1//PPP3R1//SFRP2//RASA1//QKI//WARS2//AMOT//FZD8//SIX1//ERBB3//ECE1//PAM//PKD1//VLDLR//HDAC9//OSR1//ADRA1B//COL4A3//HOXA5//SMARCA2//RHOB//IL1A//CCL5//MYH11//HOXA1//ACTC1//ITGB8//ADRB1//PRICKLE1
GO:0043506	regulation of JUN kinase activity	Biological process	8	64	454	14742	4.05892	0.000742007	0.0259216	3.12959	MAP3K5//MAP3K9//MAP3K11//SPAG9//FGD4//IRAK1//TRAF6//SFRP2
GO:0043549	regulation of kinase activity	Biological process	34	617	454	14742	1.78935	0.000764226	0.0264807	3.11678	CCNT2//CDK7//CCNK//CCNL1//GRM5//GNAI2//MAP3K5//ADAM9//TAOK2//IRAK1//MAP3K9//MAP3K11//MAPK10//TRAF6//SNX6//TRIB2//EIF2AK3//APP//DGKZ//SPAG9//FGD4//CCL5//PKD1//SLC11A1//LYN//RGS2//SFRP2//FGFR3//IRS1//RELN//VLDLR//ALS2//ERBB3//SIRT1
GO:0006195	purine nucleotide catabolic process	Biological process	29	498	454	14742	1.8909	0.000790816	0.0270499	3.10192	RHOB//DNM1//GNAI2//GNAO1//GNG10//RRAD//GNB5//RAB21//RAB38//RND1//RASD1//ACTC1//SMARCA5//TBC1D10B//RASA1//PXK//GSK3B//DOCK4//ALS2//DOCK7//FGD1//FGD6//FGD4//FGD5//BNIP2//RGS2//RGS10//UHRF1//CAT
GO:0060284	regulation of cell development	Biological process	26	428	454	14742	1.97256	0.000793344	0.0270499	3.10054	SNAI1//TGFB1I1//BAMBI//HPN//SFRP2//HOXA11//LYN//DPYSL2//SIX1//APP//HES5//BNIP2//NEUROD1//CCL5//SPAG9//GRM5//OMG//HDAC9//SEMA3A//SEMA3F//DLL4//SPEN//RTN4R//CAPRIN2//ADRB1//GSK3B
GO:0009893	positive regulation of metabolic process	Biological process	72	1617	454	14742	1.44585	0.000801764	0.02712	3.09595	NCOA1//ECE1//VAMP3//FZD8//SIRT1//ADRB1//ARID1A//GALR1//CCL5//FGF4//HPN//MAPK9//SLC11A1//QKI//OSR1//HOXA5//IL1A//IRS1//BECN1//ACVR1//APBB1//C11ORF9//CDK7//HNF4G//HOXA11//IKBKB//IRAK1//NEUROD1//SIX1//SMARCA2//SNAI1//STAT3//TGFB1I1//SMARCA5//KLF7//SPEN//BAMBI//TOX3//SMARCAD1//NSD1//HES5//PRICKLE1//TNKS2//UHRF1//GCLC//TRIB2//SFRP2//CAPRIN2//DOCK7//LYN//FGFR3//P2RX4//PTX3//GSK3B//ADRA1B//APP//DDX5//HO…
GO:0009968	negative regulation of signal transduction	Biological process	30	523	454	14742	1.8626	0.000822305	0.0275958	3.08497	GRM5//ARRB2//SNX6//LYN//RGS2//CCL5//SFRP2//TGFB1I1//SIRT1//BAMBI//DDIT4//ACVR1//RGS10//AP2A1//AP2M1//SH3KBP1//SOCS1//PEBP1//SNAI1//NEUROD1//RASA1//DGKZ//AHSG//IRS1//UBASH3A//RPS6KA6//GSK3B//CTHRC1//PRICKLE1//ERBB3
GO:0032502	developmental process	Biological process	157	4104	454	14742	1.2422	0.000835998	0.0278361	3.07779	RELN//SERPINE1//AHSG//FGFR3//GJA5//HOXA11//HOXD10//JAG2//EIF2AK3//FGF4//PKD1//EPHB2//SAT1//SH2D2A//HAND1//SIRT1//DLL4//ACVR1//PPP3R1//SFRP2//RASA1//QKI//WARS2//AMOT//SNAI1//OSR1//SIX1//PVRL2//ALS2//PYGO2//NSD1//STAT3//SEMA3F//COL13A1//PIK3CD//GSK3B//PRICKLE1//STOX2//FZD8//NAB2//HOXA5//LYN//SLC40A1//ERBB3//NEUROD1//ADRA1B//RHOB//CCBP2//DPYSL2//FGD1//HOXA1//HOXB6//HOXD8//ITGB8//L1CAM//NHLH2//OTX1//…
GO:0031325	positive regulation of cellular metabolic process	Biological process	69	1540	454	14742	1.45489	0.000883499	0.0290714	3.05379	NCOA1//ECE1//VAMP3//FZD8//SIRT1//ARID1A//ADRB1//GALR1//CCL5//HOXA5//IRS1//BECN1//ACVR1//APBB1//C11ORF9//CDK7//HNF4G//HOXA11//IKBKB//IRAK1//NEUROD1//SIX1//SMARCA2//SNAI1//STAT3//TGFB1I1//SMARCA5//KLF7//SPEN//BAMBI//TOX3//SMARCAD1//NSD1//HES5//PRICKLE1//TNKS2//UHRF1//GCLC//TRIB2//SFRP2//CAPRIN2//DOCK7//LYN//FGFR3//HPN//IL1A//P2RX4//PTX3//ADRA1B//APP//DDX5//FGF4//HOXA1//HOXD10//NHLH2//PKD1//SLC11A1/…
GO:0010604	positive regulation of macromolecule metabolic process	Biological process	66	1458	454	14742	1.4699	0.00088674	0.0290714	3.0522	NCOA1//ECE1//VAMP3//FZD8//SIRT1//ARID1A//CCL5//FGF4//HPN//MAPK9//SLC11A1//QKI//OSR1//HOXA5//ACVR1//APBB1//C11ORF9//CDK7//HNF4G//HOXA11//IKBKB//IRAK1//NEUROD1//SIX1//SMARCA2//SNAI1//STAT3//TGFB1I1//SMARCA5//KLF7//SPEN//BAMBI//TOX3//SMARCAD1//NSD1//HES5//PRICKLE1//TNKS2//UHRF1//GCLC//TRIB2//SFRP2//CAPRIN2//DOCK7//FGFR3//LYN//IL1A//IRS1//GSK3B//ADRA1B//APP//DDX5//HOXA1//HOXD10//NHLH2//PKD1//TRAF6//H…
GO:0072523	purine-containing compound catabolic process	Biological process	29	503	454	14742	1.87211	0.000924229	0.0299873	3.03422	RHOB//DNM1//GNAI2//GNAO1//GNG10//RRAD//GNB5//RAB21//RAB38//RND1//RASD1//CAT//ACTC1//SMARCA5//TBC1D10B//RASA1//PXK//GSK3B//DOCK4//ALS2//DOCK7//FGD1//FGD6//FGD4//FGD5//BNIP2//RGS2//RGS10//UHRF1
GO:0009261	ribonucleotide catabolic process	Biological process	27	456	454	14742	1.92265	0.000929689	0.0299873	3.03166	RHOB//DNM1//GNAI2//GNAO1//GNG10//RRAD//GNB5//RAB21//RAB38//RND1//RASD1//ACTC1//SMARCA5//ENTPD4//TBC1D10B//RASA1//GSK3B//DOCK4//ALS2//DOCK7//FGD1//FGD6//FGD4//FGD5//BNIP2//RGS2//RGS10
GO:0031328	positive regulation of cellular biosynthetic process	Biological process	55	1164	454	14742	1.5343	0.000935784	0.0299873	3.02882	NCOA1//ARID1A//ADRB1//GALR1//ACVR1//APBB1//C11ORF9//CDK7//HNF4G//HOXA11//IKBKB//IRAK1//NEUROD1//SIX1//SMARCA2//SNAI1//STAT3//TGFB1I1//SMARCA5//KLF7//SPEN//BAMBI//TOX3//SMARCAD1//NSD1//HES5//TNKS2//HPN//IL1A//P2RX4//PTX3//IRS1//APP//DDX5//FGF4//HOXA1//HOXA5//HOXD10//NHLH2//PKD1//SFRP2//SLC11A1//TRAF6//FZD8//HAND1//CAMTA2//SIRT1//UHRF1//CAPRIN2//FOXQ1//OSR1//PPARGC1B//NPAS4//CCL5//CDK9
GO:0070302	regulation of stress-activated protein kinase signaling cascade	Biological process	12	135	454	14742	2.88634	0.000949515	0.0302003	3.0225	MAP3K5//MAP3K9//MAP3K11//SPAG9//FGD4//TAOK2//IRAK1//TRAF6//SFRP2//IL1A//MINK1//LYN
GO:0051098	regulation of binding	Biological process	13	154	454	14742	2.74109	0.000959287	0.030285	3.01805	ARRB2//GSK3B//EPB41//PKD1//EIF2AK3//BAMBI//CAPRIN2//CTHRC1//SPAG9//UHRF1//DOT1L//NEUROD1//TRAF6
GO:0009890	negative regulation of biosynthetic process	Biological process	46	931	454	14742	1.60439	0.00101142	0.0312648	2.99507	DDX5//HIVEP1//HOXD8//SMARCA2//SNAI1//STAT3//TLE4//TRAF6//UBE2I//ZNF174//FZD8//HAND1//NCOR2//HDAC9//SPEN//SIRT1//NSD1//ZBTB10//OSR1//HES5//SMARCA5//GNAI2//GALR1//GRM3//NAB2//MAF1//GCLC//IRAK1//PTPRK//SFRP2//TSG101//EED//RASD1//TSHZ3//SNX6//PRICKLE1//EIF2AK3//CAPRIN2//EIF2C2//TNRC6A//CDK9//CCL5//TRIB2//GSK3B//SRP14//APBB1
GO:2000026	regulation of multicellular organismal development	Biological process	47	957	454	14742	1.59473	0.00101161	0.0312648	2.99499	HOXA11//SIX1//SNAI1//TGFB1I1//BAMBI//HPN//SFRP2//LYN//COL4A3//HOXA5//AMOT//AHSG//ACVR1//OSR1//HES5//EIF2AK3//C11ORF9//DPYSL2//APP//BNIP2//NEUROD1//CCL5//SPAG9//LRRC17//TRAF6//NAB2//RHOB//IL1A//SERPINE1//RPS6KA6//LAMA3//ITPKB//GRM5//OMG//HDAC9//SEMA3A//SEMA3F//DLL4//SPEN//RTN4R//CAPRIN2//EPHB2//CTHRC1//NTN4//ADRB1//GSK3B//PRICKLE1
GO:0043507	positive regulation of JUN kinase activity	Biological process	7	52	454	14742	4.37115	0.00101233	0.0312648	2.99468	MAP3K5//MAP3K9//MAP3K11//SPAG9//FGD4//IRAK1//TRAF6
GO:0006357	regulation of transcription from RNA polymerase II promoter	Biological process	50	1036	454	14742	1.56715	0.00102228	0.0313451	2.99043	DDX5//HIVEP1//HOXD8//SMARCA2//SNAI1//STAT3//TLE4//TRAF6//UBE2I//ZNF174//FZD8//HAND1//NCOR2//HDAC9//SPEN//SIRT1//NSD1//ZBTB10//OSR1//HES5//NCOA1//APP//CDK7//FGF4//HOXA1//HOXA5//HOXD10//IL1A//NEUROD1//NHLH2//PKD1//SFRP2//SIX1//SLC11A1//CAMTA2//UHRF1//CAPRIN2//FOXQ1//PPARGC1B//NPAS4//HNF4G//IFNAR2//MYCN//OTX1//SMARCD2//ARID1A//SMARCA5//KLF7//MED12L//ZNF367
GO:0016070	RNA metabolic process	Biological process	142	3668	454	14742	1.25707	0.00103761	0.0315877	2.98397	DDX5//HIVEP1//HOXD8//SMARCA2//SNAI1//STAT3//TLE4//TRAF6//UBE2I//ZNF174//FZD8//HAND1//NCOR2//HDAC9//SPEN//SIRT1//NSD1//ZBTB10//OSR1//HES5//SMARCA5//PAN3//CRNKL1//TNKS1BP1//SRRM1//CSTF2//PNN//SYNCRIP//DNAJC8//PPIL3//YTHDC1//NCOA1//CDK7//ARRB2//CCNT2//CDK9//TGFB1I1//CCNK//TRIP11//ARID1A//PTGER3//SIX1//APBB1//ARID3A//E2F5//GRM5//HOXB6//IGSF1//INSM1//MAP3K9//MYBL2//NHLH2//OTX1//PDE8A//RFX2//ZNF3//ZNF2…
GO:0051403	stress-activated MAPK cascade	Biological process	15	195	454	14742	2.4978	0.00105361	0.0318474	2.97732	FGF14//IRAK1//MAP3K5//MAP3K11//MAPK9//MAPK10//TRAF6//MAP3K12//MINK1//MAP3K9//SPAG9//FGD4//TAOK2//SFRP2//IL1A
GO:0007272	ensheathment of neurons	Biological process	8	68	454	14742	3.82016	0.00111349	0.0331867	2.95331	CLDN11//C11ORF9//HES5//EIF2AK3//NAB2//SCN2A//SCN8A//QKI
GO:0008366	axon ensheathment	Biological process	8	68	454	14742	3.82016	0.00111349	0.0331867	2.95331	C11ORF9//HES5//EIF2AK3//NAB2//SCN2A//SCN8A//QKI//CLDN11
GO:0072078	nephron tubule morphogenesis	Biological process	4	16	454	14742	8.11784	0.00120319	0.035611	2.91967	HES5//OSR1//SIX1//PKD1
GO:0030155	regulation of cell adhesion	Biological process	17	240	454	14742	2.30006	0.0012577	0.0369677	2.90042	DDR1//MINK1//RASA1//CASK//GSK3B//ERBB3//RND1//ADAM22//MIA3//L1CAM//LYN//SERPINE1//SFRP2//ADAM9//CCL5//JAG2//LAMA3
GO:0046328	regulation of JNK cascade	Biological process	11	121	454	14742	2.95194	0.00127408	0.0369855	2.8948	MAP3K5//MAP3K9//MAP3K11//SPAG9//FGD4//IRAK1//TRAF6//SFRP2//IL1A//TAOK2//MINK1
GO:0010558	negative regulation of macromolecule biosynthetic process	Biological process	42	838	454	14742	1.62744	0.00127566	0.0369855	2.89426	DDX5//HIVEP1//HOXD8//SMARCA2//SNAI1//STAT3//TLE4//TRAF6//UBE2I//ZNF174//FZD8//HAND1//NCOR2//HDAC9//SPEN//SIRT1//NSD1//ZBTB10//OSR1//HES5//SMARCA5//NAB2//MAF1//GCLC//IRAK1//PTPRK//SFRP2//TSG101//EED//RASD1//TSHZ3//SNX6//PRICKLE1//EIF2AK3//CAPRIN2//EIF2C2//TNRC6A//CDK9//TRIB2//GSK3B//SRP14//APBB1
GO:0031327	negative regulation of cellular biosynthetic process	Biological process	45	916	454	14742	1.59521	0.00128696	0.037061	2.89043	DDX5//HIVEP1//HOXD8//SMARCA2//SNAI1//STAT3//TLE4//TRAF6//UBE2I//ZNF174//FZD8//HAND1//NCOR2//HDAC9//SPEN//SIRT1//NSD1//ZBTB10//OSR1//HES5//SMARCA5//GNAI2//GALR1//GRM3//NAB2//MAF1//GCLC//IRAK1//PTPRK//SFRP2//TSG101//EED//RASD1//TSHZ3//SNX6//PRICKLE1//EIF2AK3//CAPRIN2//EIF2C2//TNRC6A//CDK9//CCL5//TRIB2//GSK3B//SRP14
GO:0033627	cell adhesion mediated by integrin	Biological process	6	40	454	14742	4.8707	0.00130243	0.037109	2.88525	LYN//SERPINE1//SFRP2//ADAM9//L1CAM//CCL5
GO:0019220	regulation of phosphate metabolic process	Biological process	44	891	454	14742	1.60352	0.00131475	0.037109	2.88116	CCNT2//CDK7//CCNK//CCNL1//GRM5//GNAI2//MAP3K5//ADAM9//TAOK2//IRAK1//MAP3K9//MAP3K11//MAPK10//TRAF6//LYN//SOCS1//PEBP1//FZD8//SIRT1//SNX6//TRIB2//EIF2AK3//APP//DGKZ//SPAG9//FGD4//CCL5//PKD1//SLC11A1//FKBP1B//SFRP2//CAPRIN2//DOCK7//MASTL//AHSG//IRS1//FGFR3//HES5//RGS2//RELN//VLDLR//ALS2//EHD4//ERBB3
GO:0051174	regulation of phosphorus metabolic process	Biological process	44	891	454	14742	1.60352	0.00131475	0.037109	2.88116	CCNT2//CDK7//CCNK//CCNL1//GRM5//GNAI2//MAP3K5//ADAM9//TAOK2//IRAK1//MAP3K9//MAP3K11//MAPK10//TRAF6//LYN//SOCS1//PEBP1//FZD8//SIRT1//SNX6//TRIB2//EIF2AK3//APP//DGKZ//SPAG9//FGD4//CCL5//PKD1//SLC11A1//FKBP1B//SFRP2//CAPRIN2//DOCK7//MASTL//AHSG//IRS1//FGFR3//HES5//RGS2//RELN//VLDLR//ALS2//EHD4//ERBB3
GO:0045859	regulation of protein kinase activity	Biological process	32	588	454	14742	1.76715	0.00132959	0.037281	2.87628	CCNT2//CDK7//CCNK//CCNL1//GRM5//GNAI2//MAP3K5//ADAM9//TAOK2//IRAK1//MAP3K9//MAP3K11//MAPK10//TRAF6//SNX6//TRIB2//EIF2AK3//APP//DGKZ//SPAG9//FGD4//CCL5//PKD1//SLC11A1//LYN//RGS2//SFRP2//RELN//VLDLR//ALS2//ERBB3//SIRT1
GO:0009891	positive regulation of biosynthetic process	Biological process	55	1183	454	14742	1.50966	0.00135407	0.0377194	2.86836	NCOA1//ARID1A//ADRB1//GALR1//HOXA5//IL1A//ACVR1//APBB1//C11ORF9//CDK7//HNF4G//HOXA11//IKBKB//IRAK1//NEUROD1//SIX1//SMARCA2//SNAI1//STAT3//TGFB1I1//SMARCA5//KLF7//SPEN//BAMBI//TOX3//SMARCAD1//NSD1//HES5//CCL5//TNKS2//HPN//SIRT1//P2RX4//PTX3//IRS1//APP//DDX5//FGF4//HOXA1//HOXD10//NHLH2//PKD1//SFRP2//SLC11A1//TRAF6//FZD8//HAND1//CAMTA2//UHRF1//CAPRIN2//FOXQ1//OSR1//PPARGC1B//NPAS4//CDK9
GO:0031324	negative regulation of cellular metabolic process	Biological process	53	1130	454	14742	1.52299	0.0013688	0.0378821	2.86366	DDX5//HIVEP1//HOXD8//SMARCA2//SNAI1//STAT3//TLE4//TRAF6//UBE2I//ZNF174//FZD8//HAND1//NCOR2//HDAC9//SPEN//SIRT1//NSD1//ZBTB10//OSR1//HES5//SMARCA5//LYN//PEBP1//GNAI2//GALR1//GRM3//NAB2//MAF1//GCLC//IRAK1//PTPRK//SFRP2//TSG101//EED//RASD1//TSHZ3//SNX6//PRICKLE1//EIF2AK3//CAPRIN2//ARRB2//EIF2C2//TNRC6A//AHSG//SOCS1//CDK9//CCL5//TRIB2//GSK3B//ADRA1B//DDIT4//SRP14//USP44
GO:0016049	cell growth	Biological process	22	353	454	14742	2.02371	0.00142213	0.038915	2.84706	DDR1//TSG101//TAOK2//KAZALD1//HPN//SFRP2//LGI1//DERL2//AHSG//APBB1//RRAD//SMARCA2//SIRT1//CAPRIN2//ARIH2//APP//OMG//SEMA3A//SEMA3F//ADRB1//ADRA1B//DDX5
GO:0048585	negative regulation of response to stimulus	Biological process	34	640	454	14742	1.72504	0.00142439	0.038915	2.84637	GRM5//ARRB2//SNX6//ACVR1//ERBB3//GSK3B//RGS10//LYN//RGS2//CCL5//SFRP2//TGFB1I1//SIRT1//BAMBI//DDIT4//AP2A1//AP2M1//SH3KBP1//SOCS1//PEBP1//SNAI1//NEUROD1//RASA1//DGKZ//AHSG//IRS1//SEMA3F//SEMA3A//UBASH3A//SERPINE1//CASK//RPS6KA6//CTHRC1//PRICKLE1
GO:0001568	blood vessel development	Biological process	26	446	454	14742	1.89295	0.00143419	0.0389331	2.84339	EPHB2//GJA5//SERPINE1//SAT1//SH2D2A//HAND1//SIRT1//DLL4//ACVR1//PPP3R1//SFRP2//RASA1//QKI//WARS2//AMOT//COL4A3//HOXA5//SIX1//RHOB//IL1A//CCL5//HOXA1//ITGB8//PKD1//OSR1//HDAC9
GO:0010557	positive regulation of macromolecule biosynthetic process	Biological process	49	1027	454	14742	1.54927	0.00146215	0.0394409	2.83501	NCOA1//ARID1A//HOXA5//ACVR1//APBB1//C11ORF9//CDK7//HNF4G//HOXA11//IKBKB//IRAK1//NEUROD1//SIX1//SMARCA2//SNAI1//STAT3//TGFB1I1//SMARCA5//KLF7//SPEN//BAMBI//TOX3//SMARCAD1//NSD1//HES5//TNKS2//IL1A//SIRT1//IRS1//APP//DDX5//FGF4//HOXA1//HOXD10//NHLH2//PKD1//SFRP2//SLC11A1//TRAF6//FZD8//HAND1//CAMTA2//UHRF1//CAPRIN2//FOXQ1//OSR1//PPARGC1B//NPAS4//CCL5
GO:0001501	skeletal system development	Biological process	22	354	454	14742	2.01799	0.00147413	0.0395142	2.83146	FGF4//PKD1//COL13A1//FGFR3//NAB2//OSR1//SFRP2//EIF2AK3//HOXA11//LRRC17//SIX1//HOXA1//HOXA5//HOXB6//HOXD10//HOXD8//HES5//SNAI1//HAND1//AHSG//GJA5//JAG2
GO:0031649	heat generation	Biological process	4	17	454	14742	7.64032	0.00153544	0.0403952	2.81377	IL1A//PTGER3//CCL5//ADRB1
GO:0032489	regulation of Cdc42 protein signal transduction	Biological process	4	17	454	14742	7.64032	0.00153544	0.0403952	2.81377	FGD1//FGD6//FGD4//FGD5
GO:0043088	regulation of Cdc42 GTPase activity	Biological process	4	17	454	14742	7.64032	0.00153544	0.0403952	2.81377	FGD1//FGD6//FGD4//FGD5
GO:0009203	ribonucleoside triphosphate catabolic process	Biological process	26	449	454	14742	1.8803	0.00157595	0.0409554	2.80246	RHOB//DNM1//GNAI2//GNAO1//GNG10//RRAD//GNB5//RAB21//RAB38//RND1//RASD1//ACTC1//SMARCA5//TBC1D10B//RASA1//GSK3B//DOCK4//ALS2//DOCK7//FGD1//FGD6//FGD4//FGD5//BNIP2//RGS2//RGS10
GO:0009207	purine ribonucleoside triphosphate catabolic process	Biological process	26	449	454	14742	1.8803	0.00157595	0.0409554	2.80246	RHOB//DNM1//GNAI2//GNAO1//GNG10//RRAD//GNB5//RAB21//RAB38//RND1//RASD1//ACTC1//SMARCA5//TBC1D10B//RASA1//GSK3B//DOCK4//ALS2//DOCK7//FGD1//FGD6//FGD4//FGD5//BNIP2//RGS2//RGS10
GO:0009146	purine nucleoside triphosphate catabolic process	Biological process	26	450	454	14742	1.87612	0.00162581	0.0417422	2.78893	RHOB//DNM1//GNAI2//GNAO1//GNG10//RRAD//GNB5//RAB21//RAB38//RND1//RASD1//ACTC1//SMARCA5//TBC1D10B//RASA1//GSK3B//DOCK4//ALS2//DOCK7//FGD1//FGD6//FGD4//FGD5//BNIP2//RGS2//RGS10
GO:0009894	regulation of catabolic process	Biological process	26	450	454	14742	1.87612	0.00162581	0.0417422	2.78893	BECN1//SIRT1//IRS1//TBC1D10B//RASA1//GCLC//TRIB2//PRICKLE1//PXK//GSK3B//DOCK4//ALS2//DOCK7//FGD1//FGD6//FGD4//FGD5//BNIP2//GNAO1//RGS2//RGS10//ADRA1B//DDIT4//ADAM9//USP44//UHRF1
GO:0045935	positive regulation of nucleobase-containing compound metabolic process	Biological process	51	1087	454	14742	1.5235	0.00167606	0.0427746	2.77571	NCOA1//ARID1A//ADRB1//GALR1//ACVR1//APBB1//C11ORF9//CDK7//HNF4G//HOXA11//IKBKB//IRAK1//NEUROD1//SIX1//SMARCA2//SNAI1//STAT3//TGFB1I1//SMARCA5//KLF7//SPEN//BAMBI//TOX3//SMARCAD1//NSD1//HES5//TNKS2//HPN//SIRT1//APP//DDX5//FGF4//HOXA1//HOXA5//HOXD10//IL1A//NHLH2//PKD1//SFRP2//SLC11A1//TRAF6//FZD8//HAND1//CAMTA2//UHRF1//CAPRIN2//FOXQ1//OSR1//PPARGC1B//NPAS4//CDK9
GO:0071842	cellular component organization at cellular level	Biological process	117	2963	454	14742	1.2822	0.00172016	0.0436388	2.76443	KIF23//BECN1//WEE1//MARK4//DOCK7//RANBP2//CENPQ//CRNKL1//MAP2//PVRL2//SMARCA5//EPB41//FGD1//TNXB//TRIP10//TAOK2//DAAM1//FGD6//FHOD3//FGD4//FGD5//AMOT//DPYSL2//SH3KBP1//MICAL1//FOXQ1//ARID1A//CHAF1A//SMARCD2//SMARCA2//SIRT1//TIMM10//TNKS1BP1//RND1//EIF2AK3//NPLOC4//PEX3//DNM1//ALS2//NAGPA//GJA5//UBE2I//CCNK//CHFR//PBK//FSD1//USP44//MASTL//ZFYVE9//APBB1//APP//ERBB3//FZD8//RTN4R//AP2A1//RHOB//CACNB2…
GO:0009887	organ morphogenesis	Biological process	36	699	454	14742	1.67235	0.0017781	0.0448417	2.75004	FGF4//PKD1//STAT3//HOXA11//SIX1//HAND1//COL13A1//FGFR3//NAB2//SFRP2//SNAI1//FOXQ1//AHSG//DDR1//SOCS1//OSR1//EPHB2//OTX1//HOXA1//JAG2//LHX8//ERBB3//NEUROD1//HOXA5//HOXB6//HOXD10//HOXD8//ACTC1//VSX1//CTHRC1//SLC40A1//NTN4//HES5//HPN//E2F5//FGD1
GO:0031399	regulation of protein modification process	Biological process	45	932	454	14742	1.56782	0.0018109	0.0454003	2.74211	CCNT2//CDK7//CCNK//CCNL1//GRM5//GNAI2//MAP3K5//ADAM9//TAOK2//IRAK1//MAP3K9//MAP3K11//MAPK10//TRAF6//LYN//SOCS1//PEBP1//FZD8//SIRT1//SNX6//TRIB2//EIF2AK3//APP//DGKZ//SPAG9//FGD4//CCL5//CDK9//ARRB2//GCLC//PRICKLE1//PKD1//SLC11A1//SFRP2//CAPRIN2//DOCK7//FGFR3//HES5//RGS2//RELN//VLDLR//ALS2//EHD4//USP44//ERBB3
GO:0009143	nucleoside triphosphate catabolic process	Biological process	26	454	454	14742	1.85959	0.00183907	0.0455705	2.7354	RHOB//DNM1//GNAI2//GNAO1//GNG10//RRAD//GNB5//RAB21//RAB38//RND1//RASD1//ACTC1//SMARCA5//TBC1D10B//RASA1//GSK3B//DOCK4//ALS2//DOCK7//FGD1//FGD6//FGD4//FGD5//BNIP2//RGS2//RGS10
GO:0009154	purine ribonucleotide catabolic process	Biological process	26	454	454	14742	1.85959	0.00183907	0.0455705	2.7354	RHOB//DNM1//GNAI2//GNAO1//GNG10//RRAD//GNB5//RAB21//RAB38//RND1//RASD1//ACTC1//SMARCA5//TBC1D10B//RASA1//GSK3B//DOCK4//ALS2//DOCK7//FGD1//FGD6//FGD4//FGD5//BNIP2//RGS2//RGS10
GO:0051246	regulation of protein metabolic process	Biological process	58	1283	454	14742	1.46792	0.00191334	0.0471367	2.71821	CCNT2//CDK7//CCNK//CCNL1//GRM5//GNAI2//MAP3K5//ADAM9//TAOK2//IRAK1//MAP3K9//MAP3K11//MAPK10//TRAF6//LYN//SOCS1//PEBP1//FZD8//SIRT1//SNX6//APP//RGS2//QKI//METAP1//EIF2C2//TNRC6A//EIF4G2//EIF5B//TRIB2//EIF2AK3//DGKZ//SPAG9//FGD4//CCL5//HPN//SERPINE1//CAPRIN2//CDK9//ARRB2//GCLC//PRICKLE1//PKD1//SLC11A1//UHRF1//SFRP2//DOCK7//ECE1//FGFR3//HES5//IL1A//GSK3B//RELN//VLDLR//ALS2//SRP14//EHD4//USP44//ERBB3
GO:0032268	regulation of cellular protein metabolic process	Biological process	53	1150	454	14742	1.49651	0.00200297	0.0490612	2.69833	CCNT2//CDK7//CCNK//CCNL1//GRM5//GNAI2//MAP3K5//ADAM9//TAOK2//IRAK1//MAP3K9//MAP3K11//MAPK10//TRAF6//LYN//SOCS1//PEBP1//FZD8//SIRT1//SNX6//APP//RGS2//QKI//METAP1//EIF2C2//TNRC6A//EIF4G2//EIF5B//TRIB2//EIF2AK3//DGKZ//SPAG9//FGD4//CCL5//CAPRIN2//CDK9//ARRB2//GCLC//PRICKLE1//PKD1//SLC11A1//UHRF1//SFRP2//DOCK7//FGFR3//HES5//RELN//VLDLR//ALS2//SRP14//EHD4//USP44//ERBB3
GO:0043583	ear development	Biological process	12	148	454	14742	2.63281	0.0020943	0.0510051	2.67896	JAG2//EPHB2//OTX1//SIX1//HOXA1//OSR1//HES5//NEUROD1//CTHRC1//HPN//DDR1//ECE1
GO:2000113	negative regulation of cellular macromolecule biosynthetic process	Biological process	40	810	454	14742	1.60352	0.00216803	0.0525009	2.66393	DDX5//HIVEP1//HOXD8//SMARCA2//SNAI1//STAT3//TLE4//TRAF6//UBE2I//ZNF174//FZD8//HAND1//NCOR2//HDAC9//SPEN//SIRT1//NSD1//ZBTB10//OSR1//HES5//SMARCA5//NAB2//MAF1//GCLC//IRAK1//PTPRK//SFRP2//TSG101//EED//RASD1//TSHZ3//SNX6//PRICKLE1//EIF2AK3//CAPRIN2//EIF2C2//TNRC6A//CDK9//GSK3B//SRP14
GO:0009605	response to external stimulus	Biological process	55	1209	454	14742	1.47719	0.00219109	0.0527595	2.65934	BECN1//NCOA1//CCL5//TRPM4//PIK3CD//CCBP2//L1CAM//CCL1//AMOT//AP2A1//RHOB//CACNB2//AP2M1//COL4A3//COL9A3//DPYSL2//EPHB2//GSK3B//MYH11//RELN//SCN8A//SEMA3F//SOS2//KLF7//LGI1//SEMA3A//RND1//RPS6KA6//DPYSL5//NTN4//GNAI2//VLDLR//CDS1//STRBP//HOXA1//SIRT1//TNRC6A//APP//SERPINE1//PTGER3//LYN//SFRP2//SLC10A3//CAT//IL1A//OMG//AHSG//HPN//TRPA1//PKD1//ARRB2//DOCK4//CASK//OSR1
GO:0044093	positive regulation of molecular function	Biological process	51	1102	454	14742	1.50276	0.00223335	0.053475	2.65104	GRM5//GNAI2//MAP3K5//ADAM9//TAOK2//IRAK1//MAP3K9//MAP3K11//MAPK10//TRAF6//COL4A3//EIF2AK3//ADRB1//GALR1//DGKZ//SPAG9//FGD4//FGFR3//CCL5//PKD1//EPB41//BAMBI//CAPRIN2//CTHRC1//SLC11A1//RASA1//SYNGR3//TBC1D10B//GSK3B//DOCK4//ALS2//DOCK7//CTSA//SIRT1//FOXQ1//BNIP2//GNAO1//RGS2//RGS10//IRS1//RELN//VLDLR//NEUROD1//NHLH2//UBE2I//CAT//IKBKB//RHEBL1//ERBB3//PPARGC1B//UHRF1
GO:0006139	nucleobase-containing compound metabolic process	Biological process	182	4970	454	14742	1.18909	0.00228542	0.0544159	2.64103	SIRT1//KPNA2//SMARCAD1//CHAF1A//REV1//POLN//DDX5//HIVEP1//HOXD8//SMARCA2//SNAI1//STAT3//TLE4//TRAF6//UBE2I//ZNF174//FZD8//HAND1//NCOR2//HDAC9//SPEN//NSD1//ZBTB10//OSR1//HES5//SMARCA5//PAN3//CRNKL1//TNKS1BP1//SRRM1//CSTF2//PNN//SYNCRIP//DNAJC8//PPIL3//YTHDC1//NCOA1//CDK7//MORF4L1//ZFYVE26//ARRB2//CCNT2//CDK9//TGFB1I1//CCNK//TRIP11//CENPQ//PGM3//CAT//RHOB//DNM1//GNAI2//GNAO1//GNG10//RRAD//GNB5//RAB…
GO:0001558	regulation of cell growth	Biological process	18	276	454	14742	2.1177	0.00230262	0.0545208	2.63778	HPN//SFRP2//LGI1//DERL2//AHSG//APBB1//RRAD//SMARCA2//SIRT1//CAPRIN2//OMG//SEMA3A//SEMA3F//ADRB1//DDR1//TSG101//TAOK2//KAZALD1
GO:0001659	temperature homeostasis	Biological process	5	31	454	14742	5.23732	0.00237503	0.0559248	2.62433	IL1A//PTGER3//CCL5//ADRB1//STAT3
GO:0031589	cell-substrate adhesion	Biological process	14	191	454	14742	2.3801	0.00240205	0.0562501	2.61942	DDR1//MINK1//RASA1//CASK//GSK3B//COL13A1//ITGB8//BCAM//PKD1//ADAM9//VAMP3//PTPRK//TAOK2//SERPINE1
GO:0008360	regulation of cell shape	Biological process	9	94	454	14742	3.10896	0.00241856	0.0563274	2.61644	FGD1//HPN//RASA1//TAOK2//BAMBI//SH3KBP1//FGD6//FGD4//FGD5
GO:0010605	negative regulation of macromolecule metabolic process	Biological process	51	1108	454	14742	1.49462	0.00249807	0.0578628	2.6024	DDX5//HIVEP1//HOXD8//SMARCA2//SNAI1//STAT3//TLE4//TRAF6//UBE2I//ZNF174//FZD8//HAND1//NCOR2//HDAC9//SPEN//SIRT1//NSD1//ZBTB10//OSR1//HES5//SMARCA5//LYN//PEBP1//SNIP1//SFRP2//NAB2//MAF1//GCLC//IRAK1//PTPRK//TSG101//EED//RASD1//TSHZ3//SNX6//PRICKLE1//EIF2AK3//CAPRIN2//EIF2C2//TNRC6A//ARRB2//SOCS1//CDK9//CCL5//TRIB2//GSK3B//ADRA1B//DDIT4//SRP14//APBB1//USP44
GO:0048514	blood vessel morphogenesis	Biological process	23	394	454	14742	1.89554	0.00260115	0.059925	2.58483	EPHB2//GJA5//SERPINE1//SAT1//SH2D2A//HAND1//SIRT1//DLL4//ACVR1//PPP3R1//SFRP2//RASA1//QKI//WARS2//AMOT//COL4A3//HOXA5//SIX1//RHOB//IL1A//CCL5//HOXA1//HDAC9
GO:0034504	protein localization to nucleus	Biological process	15	214	454	14742	2.27603	0.00263357	0.0603456	2.57946	SLC11A1//PKD1//RANBP2//STAT3//IPO7//PRICKLE1//KPNA2//ZFYVE9//SIRT1//SFRP2//BAMBI//PPP3R1//GSK3B//IRS1//SIX1
GO:0071841	cellular component organization or biogenesis at cellular level	Biological process	119	3061	454	14742	1.26236	0.00271418	0.0618601	2.56636	KIF23//BECN1//WEE1//MARK4//DOCK7//RANBP2//CENPQ//CRNKL1//MAP2//PVRL2//SMARCA5//EPB41//FGD1//TNXB//TRIP10//TAOK2//DAAM1//FGD6//FHOD3//FGD4//FGD5//AMOT//DPYSL2//SH3KBP1//MICAL1//FOXQ1//ARID1A//CHAF1A//SMARCD2//SMARCA2//SIRT1//WBP11//TIMM10//TNKS1BP1//RND1//EIF2AK3//NPLOC4//PEX3//DNM1//ALS2//NAGPA//GJA5//UBE2I//CCNK//CHFR//PBK//FSD1//USP44//MASTL//ZFYVE9//APBB1//APP//ERBB3//FZD8//RTN4R//AP2A1//RHOB/…
GO:0008219	cell death	Biological process	71	1667	454	14742	1.383	0.00279776	0.0634259	2.55319	ACTC1//ADRB1//RHOB//BNIP2//ECE1//FGD1//IL1A//MAP3K9//PPP3R1//SCN2A//SOS2//TRAF6//STK17B//TAOK2//SEMA3A//FASTK//MCF2L//TOX3//SH3KBP1//SLC40A1//DDIT4//AVEN//BIRC6//SLC5A11//FGD4//FOXQ1//GCLC//IKBKB//IRAK1//PAFAH2//BECN1//APP//COL4A3//MAP3K5//EIF2AK3//CUL2//SFRP2//FGFR3//JAG2//LYN//P2RX4//SIRT1//MAPK9//APBB1//HOXA5//NEUROD1//ACVR1//CAT//FGF4//GSK3B//HPN//SERPINE1//SNAI1//OSR1//MARK4//ERBB3//RASA1//S…
GO:0032872	regulation of stress-activated MAPK cascade	Biological process	11	134	454	14742	2.66556	0.00287543	0.0646667	2.5413	MAP3K5//MAP3K9//MAP3K11//SPAG9//FGD4//TAOK2//IRAK1//TRAF6//SFRP2//IL1A//MINK1
GO:0016265	death	Biological process	71	1669	454	14742	1.38135	0.00288284	0.0646667	2.54018	ACTC1//ADRB1//RHOB//BNIP2//ECE1//FGD1//IL1A//MAP3K9//PPP3R1//SCN2A//SOS2//TRAF6//STK17B//TAOK2//SEMA3A//FASTK//MCF2L//TOX3//SH3KBP1//SLC40A1//DDIT4//AVEN//BIRC6//SLC5A11//FGD4//FOXQ1//GCLC//IKBKB//IRAK1//PAFAH2//BECN1//APP//COL4A3//MAP3K5//EIF2AK3//EIF4G2//FGF14//L1CAM//MAP3K11//PTGER3//SFRP2//ZFYVE26//SACS//ALS2//REEP1//CUL2//FGFR3//JAG2//LYN//P2RX4//SIRT1//MAPK9//APBB1//HOXA5//NEUROD1//ACVR1//C…
GO:0061333	renal tubule morphogenesis	Biological process	4	20	454	14742	6.49427	0.00290534	0.0648301	2.5368	HES5//OSR1//SIX1//PKD1
GO:0031641	regulation of myelination	Biological process	3	10	454	14742	9.74141	0.00296237	0.0657585	2.52836	EIF2AK3//C11ORF9//HES5
GO:0033674	positive regulation of kinase activity	Biological process	24	423	454	14742	1.84235	0.00305849	0.0672634	2.51449	GRM5//GNAI2//MAP3K5//ADAM9//TAOK2//IRAK1//MAP3K9//MAP3K11//MAPK10//TRAF6//EIF2AK3//DGKZ//SPAG9//FGD4//CCL5//PKD1//SLC11A1//FGFR3//IRS1//RELN//VLDLR//ALS2//ERBB3//SIRT1
GO:0009892	negative regulation of metabolic process	Biological process	55	1228	454	14742	1.45434	0.00306173	0.0672634	2.51403	DDX5//HIVEP1//HOXD8//SMARCA2//SNAI1//STAT3//TLE4//TRAF6//UBE2I//ZNF174//FZD8//HAND1//NCOR2//HDAC9//SPEN//SIRT1//NSD1//ZBTB10//OSR1//HES5//SMARCA5//LYN//PEBP1//GNAI2//GALR1//GRM3//SNIP1//SFRP2//NAB2//MAF1//GCLC//IRAK1//PTPRK//TSG101//EED//RASD1//TSHZ3//SNX6//PRICKLE1//EIF2AK3//CAPRIN2//EIF2C2//TNRC6A//ARRB2//AHSG//SOCS1//CDK9//CCL5//TRIB2//GSK3B//ADRA1B//DDIT4//SRP14//APBB1//USP44
GO:0010717	regulation of epithelial to mesenchymal transition	Biological process	5	33	454	14742	4.9199	0.0031544	0.0689439	2.50108	SNAI1//TGFB1I1//BAMBI//HPN//SFRP2
GO:0042552	myelination	Biological process	7	64	454	14742	3.55156	0.00342804	0.0738992	2.46495	C11ORF9//HES5//EIF2AK3//NAB2//SCN2A//SCN8A//QKI
GO:0022604	regulation of cell morphogenesis	Biological process	17	264	454	14742	2.09096	0.00342915	0.0738992	2.46481	FGD1//HPN//RASA1//TAOK2//BAMBI//SH3KBP1//FGD6//FGD4//FGD5//SNAI1//TGFB1I1//SFRP2//OMG//SEMA3A//SEMA3F//RTN4R//CAPRIN2
GO:0030811	regulation of nucleotide catabolic process	Biological process	16	242	454	14742	2.14687	0.00345048	0.0738992	2.46212	TBC1D10B//RASA1//PXK//GSK3B//DOCK4//ALS2//DOCK7//FGD1//FGD6//FGD4//FGD5//BNIP2//GNAO1//RGS2//RGS10//UHRF1
GO:0033121	regulation of purine nucleotide catabolic process	Biological process	16	242	454	14742	2.14687	0.00345048	0.0738992	2.46212	TBC1D10B//RASA1//PXK//GSK3B//DOCK4//ALS2//DOCK7//FGD1//FGD6//FGD4//FGD5//BNIP2//GNAO1//RGS2//RGS10//UHRF1
GO:0003300	cardiac muscle hypertrophy	Biological process	4	21	454	14742	6.18502	0.00350273	0.0739041	2.45559	P2RX4//RGS2//CAMTA2//ADRB1
GO:0014897	striated muscle hypertrophy	Biological process	4	21	454	14742	6.18502	0.00350273	0.0739041	2.45559	P2RX4//RGS2//CAMTA2//ADRB1
GO:0007167	enzyme linked receptor protein signaling pathway	Biological process	39	807	454	14742	1.56925	0.00355991	0.0747405	2.44856	ERBB3//IRS1//LYN//ACVR1//IRAK1//PPM1L//SNX6//AP2A1//AP2M1//GSK3B//SH3KBP1//APP//ARRB2//PTPRK//ADAM9//ZFYVE9//AP3S1//FGF4//FGFR3//PTPN2//TGFB1I1//SIRT1//BAMBI//HES5//SFRP2//DDR1//AHSG//SOCS1//EIF2AK3//FGD1//IKBKB//OMG//SOS2//STAT3//TRAF6//MCF2L//RTN4R//FGD4//EPHB2
GO:0007257	activation of JUN kinase activity	Biological process	5	34	454	14742	4.7752	0.00360632	0.0749763	2.44294	MAP3K5//MAP3K9//MAP3K11//SPAG9//FGD4
GO:0033628	regulation of cell adhesion mediated by integrin	Biological process	5	34	454	14742	4.7752	0.00360632	0.0749763	2.44294	SERPINE1//SFRP2//ADAM9//CCL5//LYN
GO:0009205	purine ribonucleoside triphosphate metabolic process	Biological process	27	503	454	14742	1.743	0.00373066	0.0771849	2.42821	RHOB//DNM1//GNAI2//GNAO1//GNG10//RRAD//GNB5//RAB21//RAB38//RND1//RASD1//ACTC1//SMARCA5//ATP2A2//TBC1D10B//RASA1//GSK3B//DOCK4//ALS2//DOCK7//FGD1//FGD6//FGD4//FGD5//BNIP2//RGS2//RGS10
GO:0000186	activation of MAPKK activity	Biological process	6	49	454	14742	3.97609	0.00376041	0.0774244	2.42476	MAP3K9//MAP3K11//GNAI2//MAP3K5//ADAM9//TAOK2
GO:0009199	ribonucleoside triphosphate metabolic process	Biological process	27	504	454	14742	1.73954	0.00383167	0.0785124	2.41661	RHOB//DNM1//GNAI2//GNAO1//GNG10//RRAD//GNB5//RAB21//RAB38//RND1//RASD1//ACTC1//SMARCA5//ATP2A2//TBC1D10B//RASA1//GSK3B//DOCK4//ALS2//DOCK7//FGD1//FGD6//FGD4//FGD5//BNIP2//RGS2//RGS10
GO:0016477	cell migration	Biological process	36	734	454	14742	1.5926	0.00397969	0.080147	2.40015	ACVR1//SEMA3F//RELN//CCL5//TRPM4//PIK3CD//MIA3//SEMA3A//DDR1//SERPINE1//JAG2//LAMA3//MINK1//AMOT//IRS1//SNAI1//SPAG9//PTPRK//SFRP2//DLL4//FAP//L1CAM//LYN//SLC7A10//SIX1//ADAM9//ARRB2//DOCK4//HDAC9//HOXA5//DGKZ//TAOK2//WWC1//BAMBI//SH3KBP1//CTHRC1
GO:0033631	cell-cell adhesion mediated by integrin	Biological process	3	11	454	14742	8.85583	0.00398079	0.080147	2.40003	CCL5//L1CAM//ADAM9
GO:0072164	mesonephric tubule development	Biological process	3	11	454	14742	8.85583	0.00398079	0.080147	2.40003	OSR1//SIX1//PKD1
GO:0051347	positive regulation of transferase activity	Biological process	24	432	454	14742	1.80396	0.00398666	0.080147	2.39939	GRM5//GNAI2//MAP3K5//ADAM9//TAOK2//IRAK1//MAP3K9//MAP3K11//MAPK10//TRAF6//EIF2AK3//DGKZ//SPAG9//FGD4//CCL5//PKD1//SLC11A1//FGFR3//IRS1//RELN//VLDLR//ALS2//ERBB3//SIRT1
GO:0001837	epithelial to mesenchymal transition	Biological process	7	66	454	14742	3.44393	0.00407806	0.0815996	2.38955	SNAI1//TGFB1I1//BAMBI//HPN//SFRP2//GSK3B//PPP3R1
GO:0010467	gene expression	Biological process	152	4101	454	14742	1.20352	0.00413778	0.08224	2.38323	DDX5//HIVEP1//HOXD8//SMARCA2//SNAI1//STAT3//TLE4//TRAF6//UBE2I//ZNF174//FZD8//HAND1//NCOR2//HDAC9//SPEN//SIRT1//NSD1//ZBTB10//OSR1//HES5//SMARCA5//CRNKL1//TNKS1BP1//PAN3//SRRM1//CSTF2//PNN//SYNCRIP//DNAJC8//PPIL3//YTHDC1//NCOA1//CDK7//ARRB2//CCNT2//CDK9//TGFB1I1//CCNK//TRIP11//TRDMT1//ARID1A//EED//PTGER3//SIX1//APBB1//ARID3A//E2F5//GRM5//HOXB6//IGSF1//INSM1//MAP3K9//MYBL2//NHLH2//OTX1//PDE8A//RFX…
GO:0009144	purine nucleoside triphosphate metabolic process	Biological process	27	507	454	14742	1.72924	0.00414866	0.08224	2.38209	RHOB//DNM1//GNAI2//GNAO1//GNG10//RRAD//GNB5//RAB21//RAB38//RND1//RASD1//ACTC1//SMARCA5//ATP2A2//TBC1D10B//RASA1//GSK3B//DOCK4//ALS2//DOCK7//FGD1//FGD6//FGD4//FGD5//BNIP2//RGS2//RGS10
GO:0001508	regulation of action potential	Biological process	9	102	454	14742	2.86512	0.00420098	0.0828916	2.37665	CLDN11//P2RX4//C11ORF9//HES5//EIF2AK3//NAB2//SCN2A//SCN8A//QKI
GO:0048598	embryonic morphogenesis	Biological process	24	434	454	14742	1.79565	0.00422223	0.0829269	2.37446	ACVR1//NSD1//AMOT//SNAI1//HAND1//SFRP2//PRICKLE1//HOXA11//JAG2//GJA5//HOXD10//OSR1//FGF4//EPHB2//OTX1//SIX1//HOXA1//ECE1//NEUROD1//HOXA5//HOXB6//HES5//HPN//CTHRC1
GO:0010740	positive regulation of intracellular protein kinase cascade	Biological process	20	339	454	14742	1.91571	0.00428713	0.0838154	2.36783	CCL5//TAOK2//FGFR3//HES5//LYN//IKBKB//IL1A//IRAK1//TRAF6//CC2D1A//TMEM9B//GPR89A//BNIP2//SPAG9//WWC1//MAP3K11//MINK1//ARRB2//FGF4//ST5
GO:0045184	establishment of protein localization	Biological process	53	1196	454	14742	1.43895	0.00451234	0.0878155	2.3456	TRIP11//SLC11A1//PKD1//RANBP2//STAT3//IPO7//PRICKLE1//KPNA2//TAOK2//SRP14//NAGPA//TIMM10//AP2A1//AP2M1//AP3S1//CTSA//SEC23A//KDELR1//SNX6//ZFYVE9//RHOB//ARRB2//TSG101//CADPS//VAMP3//GOSR1//NUP153//SCAMP2//TRIM3//LMAN2//RAB32//RAB21//RAB38//GPR89B//SDAD1//SNX21//NUP35//VPS37D//MIA3//GPR89A//DERL2//SIRT1//VLDLR//SFRP2//BAMBI//PEX3//GSK3B//LYN//ADAM9//IL1A//PPP3R1//ANK3//CRIPT
GO:0048762	mesenchymal cell differentiation	Biological process	10	123	454	14742	2.63995	0.004703	0.0911099	2.32763	ACVR1//SEMA3F//GSK3B//PPP3R1//SNAI1//TGFB1I1//BAMBI//HPN//SFRP2//OSR1
GO:0046425	regulation of JAK-STAT cascade	Biological process	7	68	454	14742	3.34264	0.00481739	0.0929038	2.31719	CCL5//FGFR3//HES5//SOCS1//LYN//NEUROD1//DOT1L
GO:0009259	ribonucleotide metabolic process	Biological process	28	538	454	14742	1.68996	0.00484542	0.0929379	2.31467	RHOB//DNM1//GNAI2//GNAO1//GNG10//RRAD//GNB5//RAB21//RAB38//RND1//RASD1//ACTC1//SMARCA5//ENTPD4//ATP2A2//TBC1D10B//RASA1//GSK3B//DOCK4//ALS2//DOCK7//FGD1//FGD6//FGD4//FGD5//BNIP2//RGS2//RGS10
GO:0006041	glucosamine metabolic process	Biological process	4	23	454	14742	5.64719	0.00493679	0.0929379	2.30656	LARGE//CHST2//NAGK//PGM3
GO:0006044	N-acetylglucosamine metabolic process	Biological process	4	23	454	14742	5.64719	0.00493679	0.0929379	2.30656	PGM3//LARGE//CHST2//NAGK
GO:0014896	muscle hypertrophy	Biological process	4	23	454	14742	5.64719	0.00493679	0.0929379	2.30656	P2RX4//RGS2//CAMTA2//ADRB1
GO:0030522	intracellular receptor mediated signaling pathway	Biological process	14	207	454	14742	2.19613	0.00494643	0.0929379	2.30571	ARID1A//PPARGC1B//CDK7//TGFB1I1//NCOA1//UBE2I//DDX5//SIRT1//APP//IKBKB//IRAK1//TRAF6//PTGER3//STAT3
GO:0031331	positive regulation of cellular catabolic process	Biological process	8	86	454	14742	3.02059	0.00495	0.0929379	2.30539	BECN1//SIRT1//IRS1//GCLC//TRIB2//PRICKLE1//ADRA1B//ADAM9
GO:0001952	regulation of cell-matrix adhesion	Biological process	6	52	454	14742	3.7467	0.00506782	0.0947327	2.29518	RASA1//CASK//GSK3B//SERPINE1//DDR1//MINK1
GO:0048513	organ development	Biological process	86	2141	454	14742	1.30431	0.00511181	0.0951378	2.29142	FGF4//PKD1//SIRT1//HOXA11//STAT3//ACVR1//SEMA3F//SIX1//PIK3CD//PYGO2//OSR1//GSK3B//PPP3R1//SNAI1//STOX2//HAND1//COL13A1//FGFR3//NAB2//SFRP2//EIF2AK3//ERBB3//NEUROD1//E2F5//FGD1//DPYSL2//PEBP1//RELN//FZD8//HES5//ECE1//PAM//VLDLR//HDAC9//ADRA1B//SCN8A//HOXD10//CACNB2//ATP2A2//LAMA3//AHSG//LHX8//JAG2//TGFB1I1//BAMBI//HPN//NCOA1//HOXA1//EPHB2//PGM3//TSG101//ADAM9//ITPKB//LYN//HOXA5//IRS1//APP//GNAO1/…
GO:0001660	fever generation	Biological process	3	12	454	14742	8.11784	0.00518741	0.0952963	2.28505	PTGER3//CCL5//IL1A
GO:0072079	nephron tubule formation	Biological process	3	12	454	14742	8.11784	0.00518741	0.0952963	2.28505	HES5//OSR1//SIX1
GO:0072163	mesonephric epithelium development	Biological process	3	12	454	14742	8.11784	0.00518741	0.0952963	2.28505	PKD1//OSR1//SIX1
GO:0045995	regulation of embryonic development	Biological process	7	69	454	14742	3.2942	0.00522284	0.0954237	2.28209	AMOT//SFRP2//RPS6KA6//SNAI1//SIX1//OSR1//LAMA3
GO:0007041	lysosomal transport	Biological process	5	37	454	14742	4.38802	0.00523912	0.0954237	2.28074	NAGPA//RHOB//M6PR//TSG101//HGSNAT
GO:0008016	regulation of heart contraction	Biological process	8	87	454	14742	2.98587	0.00530866	0.0962788	2.27501	ADRA1B//ADRB1//PEBP1//SEMA3A//FKBP1B//P2RX4//RGS2//GNAO1
GO:0009141	nucleoside triphosphate metabolic process	Biological process	27	517	454	14742	1.6958	0.00536939	0.0968864	2.27008	RHOB//DNM1//GNAI2//GNAO1//GNG10//RRAD//GNB5//RAB21//RAB38//RND1//RASD1//ACTC1//SMARCA5//ATP2A2//TBC1D10B//RASA1//GSK3B//DOCK4//ALS2//DOCK7//FGD1//FGD6//FGD4//FGD5//BNIP2//RGS2//RGS10
GO:0044057	regulation of system process	Biological process	22	394	454	14742	1.81312	0.00538763	0.0968864	2.2686	ADRA1B//ADRB1//PEBP1//SEMA3A//TSHZ3//CNN1//GNAO1//FKBP1B//P2RX4//RGS2//ECE1//HES5//EIF2AK3//C11ORF9//GRM5//GRM3//PXK//GNAI2//LGI1//IL1A//SLC24A2//NEUROD1
GO:0016197	endosome transport	Biological process	10	126	454	14742	2.57709	0.00556962	0.0997383	2.25417	AP2A1//RHOB//M6PR//TSG101//EHD4//SPAG9//VAMP3//GOSR1//SNX6//VPS37D
GO:0003015	heart process	Biological process	9	107	454	14742	2.73124	0.00575181	0.101835	2.2402	ADRA1B//ADRB1//PEBP1//SEMA3A//GNAO1//FKBP1B//P2RX4//ACTC1//RGS2
GO:0060047	heart contraction	Biological process	9	107	454	14742	2.73124	0.00575181	0.101835	2.2402	ADRA1B//ADRB1//PEBP1//SEMA3A//GNAO1//FKBP1B//P2RX4//ACTC1//RGS2
GO:0032855	positive regulation of Rac GTPase activity	Biological process	4	24	454	14742	5.41189	0.0057823	0.101835	2.2379	DOCK7//GSK3B//DOCK4//ALS2
GO:0060397	JAK-STAT cascade involved in growth hormone signaling pathway	Biological process	4	24	454	14742	5.41189	0.0057823	0.101835	2.2379	IRS1//LYN//STAT3//SOCS1
GO:0019226	transmission of nerve impulse	Biological process	33	674	454	14742	1.58984	0.00587035	0.102961	2.23134	PEBP1//AP2A1//CACNB2//AP2M1//EPB41L1//GABRB1//GNAI2//GNG10//GRM3//GRM5//KCNJ3//NEFL//SYPL1//RPS6KA6//MINK1//CLDN11//CADPS//FKBP1B//P2RX4//C11ORF9//HES5//EIF2AK3//NAB2//SCN2A//SCN8A//QKI//DPYSL2//APP//PXK//LGI1//EPHB2//ADRB1//SLC24A2
GO:0006606	protein import into nucleus	Biological process	13	190	454	14742	2.22173	0.00603523	0.105419	2.21931	SLC11A1//PKD1//KPNA2//ZFYVE9//SIRT1//SFRP2//BAMBI//PPP3R1//GSK3B//RANBP2//STAT3//IPO7//PRICKLE1
GO:0051216	cartilage development	Biological process	11	148	454	14742	2.41341	0.0061045	0.106193	2.21435	FGF4//PKD1//FGFR3//OSR1//SFRP2//EIF2AK3//HOXA11//HOXA5//SNAI1//HAND1//HES5
GO:0035637	multicellular organismal signaling	Biological process	33	677	454	14742	1.5828	0.00626352	0.108461	2.20318	PEBP1//AP2A1//CACNB2//AP2M1//EPB41L1//GABRB1//GNAI2//GNG10//GRM3//GRM5//KCNJ3//NEFL//SYPL1//RPS6KA6//MINK1//CLDN11//CADPS//FKBP1B//P2RX4//C11ORF9//HES5//EIF2AK3//NAB2//SCN2A//SCN8A//QKI//DPYSL2//APP//PXK//LGI1//EPHB2//ADRB1//SLC24A2
GO:0050790	regulation of catalytic activity	Biological process	62	1468	454	14742	1.37141	0.00628572	0.108461	2.20164	CCNT2//CDK7//CCNK//CCNL1//GRM5//GNAI2//MAP3K5//ADAM9//TAOK2//IRAK1//MAP3K9//MAP3K11//MAPK10//TRAF6//SNX6//TRIB2//COL4A3//EIF2AK3//APP//ADRB1//GALR1//GRM3//DGKZ//SPAG9//FGD4//FGFR3//RGS2//CCL5//CAST//SERPINE1//PKD1//SIRT1//SLC11A1//TBC1D10B//RASA1//FKBP1B//PXK//GSK3B//DOCK4//ALS2//DOCK7//MASTL//CTSA//PPP1R11//SOCS1//FGD1//FGD6//FGD5//SFRP2//FOXQ1//LYN//BNIP2//GNAO1//RGS10//IRS1//RELN//VLDLR//USP44…
GO:0000302	response to reactive oxygen species	Biological process	9	109	454	14742	2.68112	0.00648307	0.110887	2.18822	PTPRK//GNAO1//ADAM9//TRPA1//CAT//RHOB//MAP3K5//SIRT1//SERPINE1
GO:0015031	protein transport	Biological process	51	1163	454	14742	1.42394	0.00649481	0.110887	2.18743	TRIP11//SLC11A1//PKD1//RANBP2//STAT3//IPO7//PRICKLE1//KPNA2//TAOK2//SRP14//NAGPA//TIMM10//AP2A1//AP2M1//AP3S1//CTSA//SEC23A//KDELR1//SNX6//ZFYVE9//DERL2//SIRT1//VLDLR//SFRP2//BAMBI//PEX3//GSK3B//LYN//ADAM9//IL1A//PPP3R1//RHOB//ARRB2//TSG101//CADPS//VAMP3//GOSR1//NUP153//SCAMP2//TRIM3//LMAN2//RAB32//RAB21//RAB38//GPR89B//SDAD1//SNX21//NUP35//VPS37D//MIA3//GPR89A
GO:0032319	regulation of Rho GTPase activity	Biological process	8	90	454	14742	2.88634	0.00650439	0.110887	2.18679	GSK3B//DOCK4//ALS2//DOCK7//FGD1//FGD6//FGD4//FGD5
GO:0018193	peptidyl-amino acid modification	Biological process	29	576	454	14742	1.63484	0.00657742	0.111031	2.18194	FKBP1B//FKBP3//CCL5//GSK3B//PKD1//MAP3K12//MAP2//EPHB2//FGFR3//LYN//RELN//WEE1//METAP1//PGM3//TUSC3//B4GALT6//SEC23A//MGAT4B//SIRT1//SFRP2//CAPRIN2//DOCK7//HDAC9//DDR1//HES5//SOCS1//APBB1//MORF4L1//EHD4
GO:0022617	extracellular matrix disassembly	Biological process	3	13	454	14742	7.49339	0.00659103	0.111031	2.18105	DDR1//FAP//HPN
GO:0050982	detection of mechanical stimulus	Biological process	3	13	454	14742	7.49339	0.00659103	0.111031	2.18105	HPN//TRPA1//PKD1
GO:0051170	nuclear import	Biological process	13	193	454	14742	2.18719	0.00685911	0.114898	2.16373	SLC11A1//PKD1//RANBP2//STAT3//IPO7//PRICKLE1//KPNA2//ZFYVE9//SIRT1//SFRP2//BAMBI//PPP3R1//GSK3B
GO:0009896	positive regulation of catabolic process	Biological process	9	110	454	14742	2.65675	0.00687448	0.114898	2.16276	BECN1//SIRT1//IRS1//GCLC//TRIB2//PRICKLE1//GSK3B//ADRA1B//ADAM9
GO:0045860	positive regulation of protein kinase activity	Biological process	22	403	454	14742	1.77263	0.00696797	0.116006	2.15689	GRM5//GNAI2//MAP3K5//ADAM9//TAOK2//IRAK1//MAP3K9//MAP3K11//MAPK10//TRAF6//EIF2AK3//DGKZ//SPAG9//FGD4//CCL5//PKD1//SLC11A1//ERBB3//ALS2//SIRT1//RELN//VLDLR
GO:0009150	purine ribonucleotide metabolic process	Biological process	27	528	454	14742	1.66047	0.00704535	0.116838	2.1521	RHOB//DNM1//GNAI2//GNAO1//GNG10//RRAD//GNB5//RAB21//RAB38//RND1//RASD1//ACTC1//SMARCA5//ATP2A2//TBC1D10B//RASA1//GSK3B//DOCK4//ALS2//DOCK7//FGD1//FGD6//FGD4//FGD5//BNIP2//RGS2//RGS10
GO:0043087	regulation of GTPase activity	Biological process	14	216	454	14742	2.10463	0.00713756	0.117908	2.14645	TBC1D10B//RASA1//GSK3B//DOCK4//ALS2//DOCK7//FGD1//FGD6//FGD4//FGD5//BNIP2//GNAO1//RGS2//RGS10
GO:0051056	regulation of small GTPase mediated signal transduction	Biological process	20	356	454	14742	1.82423	0.00728025	0.119801	2.13785	IQSEC1//TBC1D10B//RASA1//GSK3B//DOCK4//ALS2//DOCK7//FGD1//SOS2//MCF2L//FGD6//FGD4//FGD5//ITPKB//DGKZ//BNIP2//RELN//RHOB//TRIP10//DEPDC1B
GO:0034641	cellular nitrogen compound metabolic process	Biological process	191	5381	454	14742	1.15258	0.0074292	0.121706	2.12906	SIRT1//KPNA2//SMARCAD1//CHAF1A//REV1//POLN//GCLC//TST//DDX5//HIVEP1//HOXD8//SMARCA2//SNAI1//STAT3//TLE4//TRAF6//UBE2I//ZNF174//FZD8//HAND1//NCOR2//HDAC9//SPEN//NSD1//ZBTB10//OSR1//HES5//SMARCA5//PAN3//CRNKL1//TNKS1BP1//SRRM1//CSTF2//PNN//SYNCRIP//DNAJC8//PPIL3//YTHDC1//NCOA1//CDK7//MORF4L1//ZFYVE26//ARRB2//CCNT2//CDK9//TGFB1I1//CCNK//TRIP11//CENPQ//PGM3//DPYSL2//CAT//RHOB//DNM1//GNAI2//GNAO1//GNG…
GO:0051960	regulation of nervous system development	Biological process	21	381	454	14742	1.78976	0.00745315	0.121706	2.12766	LYN//HES5//EIF2AK3//C11ORF9//DPYSL2//SIX1//APP//BNIP2//NEUROD1//CCL5//SPAG9//GRM5//OMG//SEMA3A//SEMA3F//DLL4//SPEN//RTN4R//CAPRIN2//EPHB2//SFRP2
GO:0050896	response to stimulus	Biological process	232	6691	454	14742	1.12589	0.00752082	0.122342	2.12373	SIRT1//BECN1//FGFR3//ITPKB//MAP3K5//MAP3K9//CCL5//PPM1L//IRAK1//MAP3K11//MAPK10//TRAF6//CAT//SERPINE1//NCOA1//CDK7//MORF4L1//ZFYVE26//IL1A//ECE1//HMOX2//PAM//DDIT4//PTX3//APP//GNAI2//ADRA1B//TRDMT1//DPYSL2//ADRB1//GRM5//ARRB2//IKBKB//MAPK9//PIK3CD//SLC11A1//TRPM4//LYN//ACVR1//PVRL2//HSPA6//EIF2AK3//DERL2//TNIP1//AHSG//STAT3//IFNAR2//RHOB//ATP2A2//FGB//L1CAM//WEE1//DGKZ//KIF23//SLC7A10//TGFB1I1//T…
GO:0017038	protein import	Biological process	15	240	454	14742	2.02946	0.00756162	0.122539	2.12139	SLC11A1//PKD1//RANBP2//STAT3//IPO7//PRICKLE1//KPNA2//TIMM10//ZFYVE9//SIRT1//SFRP2//BAMBI//PEX3//PPP3R1//GSK3B
GO:0007162	negative regulation of cell adhesion	Biological process	7	74	454	14742	3.07162	0.00764498	0.12342	2.11662	RASA1//CASK//SERPINE1//ERBB3//RND1//ADAM22//MIA3
GO:0071900	regulation of protein serine/threonine kinase activity	Biological process	19	334	454	14742	1.84717	0.00772872	0.124301	2.11189	CCNT2//CDK7//CCNK//CCNL1//IRAK1//MAP3K9//MAP3K11//MAPK10//TRAF6//MAP3K5//SPAG9//FGD4//PKD1//TRIB2//LYN//RGS2//SFRP2//ALS2//SIRT1
GO:0003008	system process	Biological process	65	1568	454	14742	1.34607	0.00776515	0.124418	2.10985	PEBP1//ADRA1B//ADRB1//SEMA3A//TSHZ3//HOXA5//JAG2//ECE1//FKBP1B//GJA5//GNAO1//MYH11//CNN1//AP2A1//CACNB2//AP2M1//EPB41L1//GABRB1//GNAI2//GNG10//GRM3//GRM5//KCNJ3//NEFL//SYPL1//RPS6KA6//MINK1//SLC24A2//VSX1//RDH12//COL4A3//HOXA1//TIMM10//LHX8//VLDLR//EPB41//TBC1D8//DLL4//P2RX4//CLDN11//APP//RGS2//CAMTA2//CADPS//C11ORF9//HES5//ACTC1//EIF2AK3//NAB2//SCN2A//SCN8A//QKI//AMOT//DPYSL2//PXK//LGI1//GCLC//T…
GO:0060349	bone morphogenesis	Biological process	6	57	454	14742	3.41804	0.00794512	0.126824	2.0999	COL13A1//FGFR3//NAB2//HOXA11//FGF4//SFRP2
GO:0033124	regulation of GTP catabolic process	Biological process	14	219	454	14742	2.0758	0.00801928	0.127331	2.09586	TBC1D10B//RASA1//GSK3B//DOCK4//ALS2//DOCK7//FGD1//FGD6//FGD4//FGD5//BNIP2//GNAO1//RGS2//RGS10
GO:0032501	multicellular organismal process	Biological process	185	5201	454	14742	1.15501	0.00803659	0.127331	2.09493	AHSG//FGFR3//GJA5//HOXA11//HOXD10//JAG2//EIF2AK3//FGF4//PKD1//COL13A1//TRAF6//KAZALD1//PEBP1//EPHB2//SERPINE1//SAT1//SH2D2A//HAND1//SIRT1//DLL4//ACVR1//PPP3R1//SFRP2//RASA1//QKI//WARS2//AMOT//SNAI1//OSR1//SIX1//STAT3//IL1A//PVRL2//ALS2//PYGO2//NSD1//SEMA3F//RELN//PIK3CD//LYN//UBASH3A//SLC11A1//GSK3B//PRICKLE1//STOX2//P2RX4//FZD8//NAB2//ADRA1B//ADRB1//SEMA3A//TSHZ3//TRPM4//HOXA5//ECE1//ERBB3//NEUR…
GO:0014031	mesenchymal cell development	Biological process	9	113	454	14742	2.58621	0.00815792	0.128001	2.08842	ACVR1//SEMA3F//GSK3B//PPP3R1//SNAI1//TGFB1I1//BAMBI//HPN//SFRP2
GO:0002369	T cell cytokine production	Biological process	3	14	454	14742	6.95815	0.00819905	0.128001	2.08624	TRPM4//TRAF6//SLC11A1
GO:0060037	pharyngeal system development	Biological process	3	14	454	14742	6.95815	0.00819905	0.128001	2.08624	ACVR1//ECE1//SIX1
GO:2000108	positive regulation of leukocyte apoptosis	Biological process	3	14	454	14742	6.95815	0.00819905	0.128001	2.08624	CCL5//SIRT1//LYN
GO:0040008	regulation of growth	Biological process	25	484	454	14742	1.67724	0.0082655	0.128568	2.08273	DDR1//TSG101//TAOK2//KAZALD1//ADRB1//HPN//SFRP2//LGI1//DERL2//AHSG//APBB1//RRAD//SMARCA2//SIRT1//CAPRIN2//APP//STAT3//TNKS2//FGFR3//OMG//SEMA3A//SEMA3F//SIX1//SOCS1//MORF4L1
GO:0048011	nerve growth factor receptor signaling pathway	Biological process	14	221	454	14742	2.05701	0.00865359	0.134115	2.0628	AP2A1//AP2M1//FGD1//GSK3B//IKBKB//IRAK1//IRS1//OMG//SOS2//STAT3//TRAF6//MCF2L//RTN4R//FGD4
GO:0009790	embryo development	Biological process	37	799	454	14742	1.50368	0.00871812	0.13415	2.05958	ACVR1//JAG2//PKD1//ALS2//PYGO2//AMOT//NSD1//SNAI1//HAND1//SFRP2//PRICKLE1//HOXA11//HOXB6//HOXD8//PGM3//HES5//GJA5//HOXD10//OSR1//FGF4//EPHB2//OTX1//SIX1//HOXA1//ECE1//RPS6KA6//LAMA3//NEUROD1//HOXA5//BIRC6//HPN//CTHRC1//RASA1//FZD8//SMARCA5//STOX2//FOXQ1
GO:0051093	negative regulation of developmental process	Biological process	23	436	454	14742	1.71294	0.00871881	0.13415	2.05954	HPN//SFRP2//COL4A3//HOXA5//AMOT//FGF4//AHSG//OSR1//SIRT1//TRIB2//APP//HES5//LRRC17//RPS6KA6//FGFR3//SEMA3F//SEMA3A//OMG//RTN4R//SNAI1//SERPINE1//GSK3B//PRICKLE1
GO:0051094	positive regulation of developmental process	Biological process	29	589	454	14742	1.59876	0.00883263	0.135053	2.05391	HOXA11//SIX1//SNAI1//TGFB1I1//BAMBI//MAPK9//ACVR1//OSR1//ADAM9//AMOT//NEUROD1//SFRP2//HOXA5//BNIP2//CCL5//SPAG9//TRAF6//RHOB//IL1A//SERPINE1//ITPKB//GRM5//SPEN//CAPRIN2//EPHB2//LYN//ADRB1//HDAC9//SIRT1
GO:0002027	regulation of heart rate	Biological process	4	27	454	14742	4.81057	0.00888188	0.135053	2.05149	ADRA1B//ADRB1//FKBP1B//SEMA3A
GO:0006040	amino sugar metabolic process	Biological process	4	27	454	14742	4.81057	0.00888188	0.135053	2.05149	PGM3//LARGE//CHST2//NAGK
GO:0012501	programmed cell death	Biological process	63	1521	454	14742	1.34497	0.00890424	0.135053	2.0504	ACTC1//ADRB1//RHOB//BNIP2//ECE1//FGD1//IL1A//MAP3K9//PPP3R1//SCN2A//SOS2//TRAF6//STK17B//TAOK2//SEMA3A//FASTK//MCF2L//TOX3//SH3KBP1//SLC40A1//DDIT4//AVEN//BIRC6//SLC5A11//FGD4//FOXQ1//GCLC//IKBKB//IRAK1//PAFAH2//BECN1//APP//COL4A3//MAP3K5//EIF2AK3//CUL2//SFRP2//FGFR3//JAG2//LYN//P2RX4//SIRT1//MAPK9//APBB1//HOXA5//NEUROD1//ACVR1//CAT//FGF4//GSK3B//HPN//SERPINE1//SNAI1//OSR1//MARK4//ERBB3//RASA1//S…
GO:0051301	cell division	Biological process	23	437	454	14742	1.70902	0.00894778	0.135232	2.04828	RASA1//BECN1//KIF23//ZFYVE26//SEPT3//BIRC6//RHOB//CAT//FGF4//IL1A//SFRP2//CCNT2//CDK7//GNAI2//TSG101//UBE2I//WEE1//CCNK//CHFR//FSD1//USP44//KLHL22//MASTL
GO:0007034	vacuolar transport	Biological process	5	42	454	14742	3.86564	0.00902081	0.135854	2.04475	NAGPA//HGSNAT//RHOB//M6PR//TSG101
GO:0030521	androgen receptor signaling pathway	Biological process	6	59	454	14742	3.30217	0.00937257	0.140654	2.02814	DDX5//SIRT1//CDK7//TGFB1I1//ARID1A//NCOA1
GO:0045944	positive regulation of transcription from RNA polymerase II promoter	Biological process	29	592	454	14742	1.59066	0.0094347	0.140792	2.02527	NCOA1//APP//CDK7//DDX5//FGF4//HOXA1//HOXA5//HOXD10//IL1A//NEUROD1//NHLH2//PKD1//SFRP2//SIX1//SLC11A1//SMARCA2//STAT3//TRAF6//FZD8//HAND1//CAMTA2//SIRT1//UHRF1//CAPRIN2//FOXQ1//OSR1//PPARGC1B//NPAS4//HES5
GO:0042542	response to hydrogen peroxide	Biological process	7	77	454	14742	2.95194	0.00944777	0.140792	2.02467	CAT//RHOB//MAP3K5//SIRT1//GNAO1//ADAM9//TRPA1
GO:2000677	regulation of transcription regulatory region DNA binding	Biological process	3	15	454	14742	6.49427	0.0100176	0.148148	1.99923	NEUROD1//TRAF6//DOT1L
GO:0009954	proximal/distal pattern formation	Biological process	4	28	454	14742	4.63877	0.0101152	0.148148	1.99503	HES5//OSR1//HOXA11//HOXD10
GO:0046626	regulation of insulin receptor signaling pathway	Biological process	4	28	454	14742	4.63877	0.0101152	0.148148	1.99503	AHSG//IRS1//SOCS1//SIRT1
GO:0051057	positive regulation of small GTPase mediated signal transduction	Biological process	4	28	454	14742	4.63877	0.0101152	0.148148	1.99503	ALS2//ITPKB//BNIP2//RELN
GO:0072088	nephron epithelium morphogenesis	Biological process	4	28	454	14742	4.63877	0.0101152	0.148148	1.99503	HES5//OSR1//SIX1//PKD1
GO:0018108	peptidyl-tyrosine phosphorylation	Biological process	11	159	454	14742	2.24645	0.0102392	0.14894	1.98974	CCL5//DDR1//FGFR3//HES5//SOCS1//LYN//RELN//EHD4//SFRP2//EPHB2//WEE1
GO:0043410	positive regulation of MAPK cascade	Biological process	11	159	454	14742	2.24645	0.0102392	0.14894	1.98974	TAOK2//IL1A//MAP3K11//MINK1//ARRB2//FGF4//FGFR3//ST5//BNIP2//SPAG9//WWC1
GO:0006807	nitrogen compound metabolic process	Biological process	193	5488	454	14742	1.14194	0.010686	0.154123	1.97118	SIRT1//KPNA2//SMARCAD1//CHAF1A//REV1//POLN//GCLC//TST//DDX5//HIVEP1//HOXD8//SMARCA2//SNAI1//STAT3//TLE4//TRAF6//UBE2I//ZNF174//FZD8//HAND1//NCOR2//HDAC9//SPEN//NSD1//ZBTB10//OSR1//HES5//SMARCA5//PAN3//CRNKL1//TNKS1BP1//SRRM1//CSTF2//PNN//SYNCRIP//DNAJC8//PPIL3//YTHDC1//NCOA1//CDK7//MORF4L1//ZFYVE26//ARRB2//CCNT2//CDK9//TGFB1I1//CCNK//TRIP11//CENPQ//PGM3//DPYSL2//CAT//RHOB//DNM1//GNAI2//GNAO1//GNG…
GO:0030518	intracellular steroid hormone receptor signaling pathway	Biological process	8	98	454	14742	2.65072	0.0106894	0.154123	1.97105	ARID1A//PPARGC1B//CDK7//TGFB1I1//NCOA1//UBE2I//DDX5//SIRT1
GO:0007169	transmembrane receptor protein tyrosine kinase signaling pathway	Biological process	29	598	454	14742	1.5747	0.0107401	0.154123	1.96899	SNX6//AP2A1//AP2M1//GSK3B//SH3KBP1//APP//AP3S1//FGF4//FGFR3//IRS1//PTPN2//DDR1//AHSG//SOCS1//SIRT1//EIF2AK3//FGD1//IKBKB//IRAK1//OMG//SOS2//STAT3//TRAF6//MCF2L//RTN4R//FGD4//EPHB2//LYN//ERBB3
GO:0007264	small GTPase mediated signal transduction	Biological process	29	598	454	14742	1.5747	0.0107401	0.154123	1.96899	ADRB1//RHOB//IQSEC1//ALS2//FGD1//SOS2//MCF2L//FGD6//FGD4//FGD5//ITPKB//RASA1//DGKZ//TRIP10//DEPDC1B//BNIP2//RELN//RRAD//RAB32//RAB21//RAB38//RND1//RASD1//RHEBL1//ARL10
GO:0006417	regulation of translation	Biological process	12	182	454	14742	2.14097	0.0107848	0.154245	1.96719	EIF4G2//EIF5B//EIF2AK3//CAPRIN2//EIF2C2//TNRC6A//SRP14//CCL5//APP//RGS2//QKI//METAP1
GO:0010469	regulation of receptor activity	Biological process	6	61	454	14742	3.1939	0.0109742	0.156428	1.95963	SNX6//APP//PPARGC1B//MINK1//SERPINE1//UBE2I
GO:0006915	apoptotic process	Biological process	62	1509	454	14742	1.33414	0.0111356	0.158029	1.95329	FOXQ1//BNIP2//GCLC//IKBKB//IL1A//IRAK1//PAFAH2//TRAF6//BECN1//AVEN//BIRC6//APP//COL4A3//STK17B//MAP3K5//EIF2AK3//RHOB//FGD1//SOS2//FASTK//MCF2L//FGD4//PPP3R1//CUL2//SFRP2//FGFR3//JAG2//LYN//P2RX4//SIRT1//MAPK9//APBB1//HOXA5//NEUROD1//ACVR1//CAT//FGF4//GSK3B//HPN//SERPINE1//SNAI1//OSR1//ERBB3//RASA1//SIX1//TOX3//MAP3K11//CCL5//DDX5//ACTC1//ADRB1//ECE1//MAP3K9//SCN2A//TAOK2//SEMA3A//SH3KBP1//SLC40A…
GO:0018212	peptidyl-tyrosine modification	Biological process	11	161	454	14742	2.21854	0.0111795	0.158029	1.95158	CCL5//EPHB2//FGFR3//LYN//RELN//WEE1//DDR1//HES5//SOCS1//EHD4//SFRP2
GO:0043067	regulation of programmed cell death	Biological process	50	1170	454	14742	1.38767	0.0111977	0.158029	1.95087	PVRL2//BNIP2//GCLC//IKBKB//IL1A//IRAK1//PAFAH2//TRAF6//BECN1//AVEN//BIRC6//APP//COL4A3//STK17B//FGD1//MAP3K5//SOS2//FASTK//MCF2L//FGD4//PPP3R1//CUL2//SFRP2//FGFR3//JAG2//LYN//P2RX4//SIRT1//MAPK9//APBB1//RHOB//HOXA5//NEUROD1//ACVR1//CAT//FGF4//GSK3B//HPN//SERPINE1//SNAI1//OSR1//MARK4//ERBB3//RASA1//SIX1//TOX3//MAP3K11//CCL5//ARRB2//DDX5
GO:0048871	multicellular organismal homeostasis	Biological process	10	140	454	14742	2.31938	0.011375	0.16	1.94405	STAT3//IL1A//P2RX4//PTGER3//CCL5//ADRB1//AHSG//SLC11A1//SLC40A1//NEUROD1
GO:0042551	neuron maturation	Biological process	4	29	454	14742	4.47881	0.0114543	0.16006	1.94103	APP//RND1//NTN4//VSX1
GO:1900076	regulation of cellular response to insulin stimulus	Biological process	4	29	454	14742	4.47881	0.0114543	0.16006	1.94103	AHSG//IRS1//SOCS1//SIRT1
GO:0044249	cellular biosynthetic process	Biological process	169	4746	454	14742	1.15627	0.011972	0.166228	1.92183	CHAF1A//SIRT1//REV1//POLN//DDX5//HIVEP1//HOXD8//SMARCA2//SNAI1//STAT3//TLE4//TRAF6//UBE2I//ZNF174//FZD8//HAND1//NCOR2//HDAC9//SPEN//NSD1//ZBTB10//OSR1//HES5//SMARCA5//NCOA1//CDK7//ARRB2//CCNT2//CDK9//CSTF2//TGFB1I1//CCNK//TRIP11//SRRM1//PGM1//PGM3//SLC25A12//ESCO1//ARID1A//PTGER3//SIX1//APBB1//ARID3A//E2F5//GRM5//HOXB6//IGSF1//INSM1//MAP3K9//MYBL2//NHLH2//OTX1//PDE8A//PNN//RFX2//ZNF3//ZNF207//MOR…
GO:0090263	positive regulation of canonical Wnt receptor signaling pathway	Biological process	5	45	454	14742	3.60793	0.0120213	0.166228	1.92005	SFRP2//BAMBI//TRPM4//CAPRIN2//TNKS2
GO:0001953	negative regulation of cell-matrix adhesion	Biological process	3	16	454	14742	6.08838	0.0120517	0.166228	1.91895	SERPINE1//RASA1//CASK
GO:0055117	regulation of cardiac muscle contraction	Biological process	3	16	454	14742	6.08838	0.0120517	0.166228	1.91895	FKBP1B//RGS2//P2RX4
GO:0051179	localization	Biological process	149	4126	454	14742	1.17262	0.0122756	0.167766	1.91096	TRIP11//SLC11A1//ACVR1//SEMA3F//RELN//P2RX4//ARRB2//CCL5//TRPM4//PIK3CD//LYN//APP//FGB//SERPINE1//MIA3//PKD1//AP2M1//AP3S1//VAMP3//GOSR1//SEC23A//KDELR1//RANBP2//STAT3//IPO7//PRICKLE1//SRRM1//KPNA2//TAOK2//SRP14//NAGPA//TIMM10//ATP2A2//CACNB2//GABRB1//GJA5//GJB1//M6PR//NDUFA8//SORL1//VLDLR//TUSC3//SLC10A3//TXNL1//QKI//LAPTM4A//STARD3//CROT//SLC35A5//KCNJ3//SCN2A//SCN8A//SCN9A//TRPA1//SLC24A2//CNN…
GO:0032147	activation of protein kinase activity	Biological process	15	254	454	14742	1.9176	0.0123296	0.167766	1.90905	GRM5//GNAI2//MAP3K5//ADAM9//TAOK2//IRAK1//MAP3K9//MAP3K11//MAPK10//TRAF6//DGKZ//SPAG9//FGD4//CCL5//SLC11A1
GO:0051259	protein oligomerization	Biological process	15	254	454	14742	1.9176	0.0123296	0.167766	1.90905	P2RX4//SPAG9//LGI1//EIF2AK3//EHD4//SMARCAD1//CAT//CCL5//CPSF6//PFKP//PDSS1//IRS1//GJB1//IRAK1//HGSNAT
GO:0048870	cell motility	Biological process	36	791	454	14742	1.47784	0.01236	0.167766	1.90798	ACVR1//SEMA3F//RELN//CCL5//TRPM4//PIK3CD//MIA3//SEMA3A//DDR1//SERPINE1//HOXA5//PTPRK//DGKZ//TAOK2//WWC1//BAMBI//SH3KBP1//CTHRC1//JAG2//LAMA3//MINK1//AMOT//IRS1//SNAI1//SPAG9//SFRP2//DLL4//FAP//L1CAM//LYN//SLC7A10//SIX1//ADAM9//ARRB2//DOCK4//HDAC9
GO:0051674	localization of cell	Biological process	36	791	454	14742	1.47784	0.01236	0.167766	1.90798	ACVR1//SEMA3F//RELN//CCL5//TRPM4//PIK3CD//MIA3//SEMA3A//DDR1//SERPINE1//HOXA5//PTPRK//DGKZ//TAOK2//WWC1//BAMBI//SH3KBP1//CTHRC1//JAG2//LAMA3//MINK1//AMOT//IRS1//SNAI1//SPAG9//SFRP2//DLL4//FAP//L1CAM//LYN//SLC7A10//SIX1//ADAM9//ARRB2//DOCK4//HDAC9
GO:0007179	transforming growth factor beta receptor signaling pathway	Biological process	9	121	454	14742	2.41523	0.0124722	0.168687	1.90406	TGFB1I1//SIRT1//BAMBI//SNX6//ACVR1//ARRB2//PTPRK//ADAM9//ZFYVE9
GO:0046907	intracellular transport	Biological process	45	1038	454	14742	1.40772	0.0125071	0.168687	1.90284	TRIP11//SLC11A1//PKD1//RANBP2//STAT3//IPO7//PRICKLE1//SRRM1//KPNA2//TAOK2//SRP14//NAGPA//TIMM10//STARD3//AP2A1//AP2M1//AP3S1//CTSA//SEC23A//KDELR1//SNX6//GOSR1//SCAMP2//HGSNAT//ZFYVE9//APP//NEFL//RHOB//M6PR//TSG101//FKBP1B//VPS37D//DERL2//EHD4//SIRT1//SFRP2//BAMBI//TST//SPAG9//VAMP3//SLC25A12//PEX3//GSK3B//PPP3R1//ATP2A2
GO:0007417	central nervous system development	Biological process	29	606	454	14742	1.55391	0.0127067	0.170838	1.89597	DPYSL2//PEBP1//RELN//SFRP2//FZD8//PYGO2//HES5//C11ORF9//LYN//PKD1//VLDLR//HOXD10//NEUROD1//NCOA1//HOXA1//GSK3B//LHX8//MAP2//AHSG//EPHB2//APP//GNAO1//OTX1//STAT3//NHLH2//PAM//IL1RAPL2//RPS6KA6//ADAM22
GO:0008104	protein localization	Biological process	59	1434	454	14742	1.33599	0.0128474	0.171306	1.89118	TRIP11//SLC11A1//PKD1//RANBP2//STAT3//IPO7//PRICKLE1//KPNA2//TAOK2//SRP14//KDELR1//NAGPA//TIMM10//AP2A1//AP2M1//AP3S1//CTSA//SEC23A//SNX6//ZFYVE9//RHOB//ARRB2//TSG101//CADPS//VAMP3//GOSR1//NUP153//SCAMP2//TRIM3//LMAN2//RAB32//RAB21//RAB38//GPR89B//SDAD1//SNX21//NUP35//VPS37D//MIA3//GPR89A//DERL2//SIRT1//PTPRK//VLDLR//IRS1//PPP3R1//SIX1//AMOT//SFRP2//BAMBI//PEX3//ANK3//CRIPT//GSK3B//LYN//ADAM9//IL…
GO:0007178	transmembrane receptor protein serine/threonine kinase signaling pathway	Biological process	13	209	454	14742	2.01975	0.0128706	0.171306	1.8904	ACVR1//ARRB2//PTPRK//ADAM9//ZFYVE9//TGFB1I1//SIRT1//BAMBI//SNX6//HES5//SFRP2//IRAK1//PPM1L
GO:0060396	growth hormone receptor signaling pathway	Biological process	4	30	454	14742	4.32952	0.0129022	0.171306	1.88934	IRS1//LYN//STAT3//SOCS1
GO:0071378	cellular response to growth hormone stimulus	Biological process	4	30	454	14742	4.32952	0.0129022	0.171306	1.88934	STAT3//IRS1//LYN//SOCS1
GO:0060348	bone development	Biological process	7	82	454	14742	2.77195	0.013115	0.173587	1.88223	COL13A1//FGFR3//NAB2//LRRC17//SFRP2//HOXA11//FGF4
GO:0031018	endocrine pancreas development	Biological process	5	46	454	14742	3.5295	0.0131554	0.173587	1.88089	NEUROD1//GSK3B//HNF4G//INSM1//EIF2AK3
GO:0010721	negative regulation of cell development	Biological process	8	102	454	14742	2.54677	0.0134065	0.176354	1.87268	HPN//SFRP2//HES5//SEMA3F//SEMA3A//OMG//RTN4R//GSK3B
GO:0044248	cellular catabolic process	Biological process	65	1611	454	14742	1.31014	0.0136701	0.179268	1.86423	BECN1//TST//PAN3//CHFR//ARIH2//FBXL14//TNKS1BP1//CDK7//RHOB//DNM1//GNAI2//GNAO1//GNG10//RRAD//GNB5//RAB21//RAB38//RND1//RASD1//CAT//ACTC1//SMARCA5//DPYSL2//DPYSL5//ENTPD4//FOXQ1//UBE2I//CUL2//USP44//USP48//USP27X//GLDC//CROT//HMOX2//ECE1//SIRT1//DERL2//NPLOC4//TGFB1I1//IRS1//TBC1D10B//RASA1//GCLC//TRIB2//PRICKLE1//PXK//GSK3B//DOCK4//ALS2//DOCK7//FGD1//FGD6//FGD4//FGD5//ARRB2//ZNRF1//TRIM9//TSG101…
GO:0090101	negative regulation of transmembrane receptor protein serine/threonine kinase signaling pathway	Biological process	6	64	454	14742	3.04419	0.0137257	0.179445	1.86247	TGFB1I1//SIRT1//BAMBI//SNX6//SFRP2//ACVR1
GO:0048839	inner ear development	Biological process	9	123	454	14742	2.37595	0.0137759	0.17955	1.86088	JAG2//EPHB2//OTX1//SIX1//HES5//CTHRC1//HOXA1//HPN//NEUROD1
GO:0001525	angiogenesis	Biological process	18	330	454	14742	1.77117	0.0139734	0.181569	1.8547	ACVR1//PPP3R1//SFRP2//COL4A3//HOXA5//AMOT//RHOB//IL1A//SERPINE1//CCL5//HDAC9//EPHB2//GJA5//SAT1//SH2D2A//HAND1//SIRT1//DLL4
GO:0006140	regulation of nucleotide metabolic process	Biological process	20	380	454	14742	1.70902	0.0142019	0.182355	1.84765	ADRB1//GALR1//GNAI2//GRM3//TBC1D10B//RASA1//PXK//GSK3B//DOCK4//ALS2//DOCK7//FGD1//FGD6//FGD4//FGD5//BNIP2//GNAO1//RGS2//RGS10//UHRF1
GO:0006378	mRNA polyadenylation	Biological process	3	17	454	14742	5.73024	0.0143052	0.182355	1.84451	APP//CSTF2//CPSF6
GO:0010611	regulation of cardiac muscle hypertrophy	Biological process	3	17	454	14742	5.73024	0.0143052	0.182355	1.84451	P2RX4//RGS2//ADRB1
GO:0033630	positive regulation of cell adhesion mediated by integrin	Biological process	3	17	454	14742	5.73024	0.0143052	0.182355	1.84451	CCL5//SFRP2//ADAM9
GO:0045061	thymic T cell selection	Biological process	3	17	454	14742	5.73024	0.0143052	0.182355	1.84451	ITPKB//MINK1//JAG2
GO:0090103	cochlea morphogenesis	Biological process	3	17	454	14742	5.73024	0.0143052	0.182355	1.84451	HOXA1//HPN//CTHRC1
GO:0017148	negative regulation of translation	Biological process	5	47	454	14742	3.4544	0.0143596	0.182355	1.84286	EIF2AK3//EIF2C2//TNRC6A//SRP14//CAPRIN2
GO:0045934	negative regulation of nucleobase-containing compound metabolic process	Biological process	38	854	454	14742	1.44486	0.0144014	0.182355	1.84159	DDX5//HIVEP1//HOXD8//SMARCA2//SNAI1//STAT3//TLE4//TRAF6//UBE2I//ZNF174//FZD8//HAND1//NCOR2//HDAC9//SPEN//SIRT1//NSD1//ZBTB10//OSR1//HES5//SMARCA5//GNAI2//GALR1//GRM3//NAB2//MAF1//GCLC//IRAK1//PTPRK//SFRP2//TSG101//EED//RASD1//TSHZ3//SNX6//PRICKLE1//CDK9//CCL5
GO:0014812	muscle cell migration	Biological process	4	31	454	14742	4.18985	0.0144618	0.182355	1.83978	DDR1//CCL5//SERPINE1//SIX1
GO:0072028	nephron morphogenesis	Biological process	4	31	454	14742	4.18985	0.0144618	0.182355	1.83978	HES5//OSR1//SIX1//PKD1
GO:0042981	regulation of apoptotic process	Biological process	49	1161	454	14742	1.37045	0.0148441	0.18641	1.82845	PVRL2//BNIP2//GCLC//IKBKB//IL1A//IRAK1//PAFAH2//TRAF6//BECN1//AVEN//BIRC6//APP//COL4A3//STK17B//FGD1//MAP3K5//SOS2//FASTK//MCF2L//FGD4//PPP3R1//CUL2//SFRP2//MAPK9//SIRT1//APBB1//RHOB//HOXA5//NEUROD1//ACVR1//CAT//FGF4//GSK3B//HPN//SERPINE1//SNAI1//OSR1//ERBB3//RASA1//SIX1//TOX3//MAP3K11//CCL5//ARRB2//DDX5//LYN//FGFR3//JAG2//P2RX4
GO:0032844	regulation of homeostatic process	Biological process	13	213	454	14742	1.98182	0.0148708	0.18641	1.82766	P2RX4//FKBP1B//PTGER3//CCL5//HES5//EIF2AK3//C11ORF9//TNKS2//LYN//HOXA5//AHSG//GCLC//NEUROD1
GO:0010629	negative regulation of gene expression	Biological process	36	802	454	14742	1.45757	0.0150301	0.187838	1.82304	DDX5//HIVEP1//HOXD8//SMARCA2//SNAI1//STAT3//TLE4//TRAF6//UBE2I//ZNF174//FZD8//HAND1//NCOR2//HDAC9//SPEN//SIRT1//NSD1//ZBTB10//OSR1//HES5//SMARCA5//SNIP1//NAB2//MAF1//GCLC//IRAK1//PTPRK//SFRP2//TSG101//EED//RASD1//TSHZ3//SNX6//PRICKLE1//EIF2C2//TNRC6A
GO:0051253	negative regulation of RNA metabolic process	Biological process	34	748	454	14742	1.47597	0.0150728	0.187838	1.8218	DDX5//HIVEP1//HOXD8//SMARCA2//SNAI1//STAT3//TLE4//TRAF6//UBE2I//ZNF174//FZD8//HAND1//NCOR2//HDAC9//SPEN//SIRT1//NSD1//ZBTB10//OSR1//HES5//SMARCA5//NAB2//MAF1//GCLC//IRAK1//PTPRK//SFRP2//TSG101//EED//RASD1//TSHZ3//SNX6//PRICKLE1//CCL5
GO:0045595	regulation of cell differentiation	Biological process	38	857	454	14742	1.4398	0.0151524	0.188278	1.81952	SNAI1//TGFB1I1//BAMBI//HPN//SFRP2//HOXA11//MAPK9//LYN//FGF4//OSR1//NEUROD1//SIRT1//TRIB2//HOXA5//DPYSL2//SIX1//APP//HES5//BNIP2//CCL5//SPAG9//DDX5//ACVR1//LRRC17//TRAF6//ITPKB//GRM5//OMG//HDAC9//SEMA3A//SEMA3F//DLL4//SPEN//RTN4R//CAPRIN2//ADRB1//GSK3B//PRICKLE1
GO:0051234	establishment of localization	Biological process	126	3442	454	14742	1.18867	0.0152065	0.188401	1.81797	TRIP11//SLC11A1//P2RX4//ARRB2//LYN//APP//FGB//SERPINE1//PKD1//AP2M1//AP3S1//VAMP3//GOSR1//SEC23A//KDELR1//RANBP2//STAT3//IPO7//PRICKLE1//SRRM1//KPNA2//TAOK2//SRP14//NAGPA//TIMM10//ATP2A2//CACNB2//GABRB1//GJA5//GJB1//M6PR//NDUFA8//SORL1//VLDLR//TUSC3//SLC10A3//TXNL1//QKI//LAPTM4A//STARD3//CROT//SLC35A5//KCNJ3//SCN2A//SCN8A//SCN9A//TRPA1//SLC24A2//CNNM3//SLC40A1//GPR89B//TRPM4//TRPV6//SLC7A10//CACH…
GO:0090304	nucleic acid metabolic process	Biological process	150	4183	454	14742	1.1644	0.0153032	0.188643	1.81522	SIRT1//KPNA2//SMARCAD1//CHAF1A//REV1//POLN//DDX5//HIVEP1//HOXD8//SMARCA2//SNAI1//STAT3//TLE4//TRAF6//UBE2I//ZNF174//FZD8//HAND1//NCOR2//HDAC9//SPEN//NSD1//ZBTB10//OSR1//HES5//SMARCA5//PAN3//CRNKL1//TNKS1BP1//SRRM1//CSTF2//PNN//SYNCRIP//DNAJC8//PPIL3//YTHDC1//NCOA1//CDK7//MORF4L1//ZFYVE26//ARRB2//CCNT2//CDK9//TGFB1I1//CCNK//TRIP11//CENPQ//ESCO1//EPC2//UHRF1//C9ORF80//TRDMT1//FOXQ1//ARID1A//PTGER3/…
GO:0009058	biosynthetic process	Biological process	171	4839	454	14742	1.14747	0.0153145	0.188643	1.8149	CHAF1A//SIRT1//REV1//POLN//DDX5//HIVEP1//HOXD8//SMARCA2//SNAI1//STAT3//TLE4//TRAF6//UBE2I//ZNF174//FZD8//HAND1//NCOR2//HDAC9//SPEN//NSD1//ZBTB10//OSR1//HES5//SMARCA5//NCOA1//CDK7//ARRB2//CCNT2//CDK9//CSTF2//TGFB1I1//CCNK//TRIP11//SRRM1//PGM1//PGM3//SLC25A12//ESCO1//ARID1A//PTGER3//SIX1//APBB1//ARID3A//E2F5//GRM5//HOXB6//IGSF1//INSM1//MAP3K9//MYBL2//NHLH2//OTX1//PDE8A//PNN//RFX2//ZNF3//ZNF207//MOR…
GO:0045892	negative regulation of transcription, DNA-dependent	Biological process	33	723	454	14742	1.4821	0.0156185	0.191833	1.80636	DDX5//HIVEP1//HOXD8//SMARCA2//SNAI1//STAT3//TLE4//TRAF6//UBE2I//ZNF174//FZD8//HAND1//NCOR2//HDAC9//SPEN//SIRT1//NSD1//ZBTB10//OSR1//HES5//SMARCA5//NAB2//MAF1//GCLC//IRAK1//PTPRK//SFRP2//TSG101//EED//RASD1//TSHZ3//SNX6//PRICKLE1
GO:0042147	retrograde transport, endosome to Golgi	Biological process	4	32	454	14742	4.05892	0.0161356	0.196743	1.79221	SPAG9//VAMP3//GOSR1//SNX6
GO:0006163	purine nucleotide metabolic process	Biological process	33	725	454	14742	1.47801	0.0161988	0.196743	1.79052	RHOB//DNM1//GNAI2//GNAO1//GNG10//RRAD//GNB5//RAB21//RAB38//RND1//RASD1//CAT//ACTC1//SMARCA5//ATP2A2//ADRB1//GALR1//GRM3//TBC1D10B//RASA1//PXK//GSK3B//DOCK4//ALS2//DOCK7//FGD1//FGD6//FGD4//FGD5//BNIP2//RGS2//RGS10//UHRF1
GO:0007155	cell adhesion	Biological process	40	916	454	14742	1.41796	0.0162029	0.196743	1.79041	FGF4//PKD1//L1CAM//DDR1//MINK1//RASA1//CASK//GSK3B//PVRL2//PCDH10//DSG4//CCL5//COL13A1//ITGB8//BCAM//ADAM9//ERBB3//RND1//ADAM22//MIA3//CLDN11//JAG2//LAMA3//LYN//SERPINE1//SFRP2//VAMP3//PTPRK//TAOK2//PLEKHA7//APP//RHOB//ATP2A2//COL4A3//OMG//PNN//RELN//TGFB1I1//TNXB//HES5
GO:0022610	biological adhesion	Biological process	40	916	454	14742	1.41796	0.0162029	0.196743	1.79041	FGF4//PKD1//L1CAM//DDR1//MINK1//RASA1//CASK//GSK3B//APP//RHOB//ATP2A2//COL4A3//ITGB8//BCAM//OMG//CLDN11//PNN//RELN//PTPRK//PVRL2//TGFB1I1//TNXB//ADAM9//PCDH10//DSG4//HES5//CCL5//COL13A1//ERBB3//RND1//ADAM22//MIA3//JAG2//LAMA3//LYN//SERPINE1//SFRP2//VAMP3//TAOK2//PLEKHA7
GO:0051172	negative regulation of nitrogen compound metabolic process	Biological process	38	862	454	14742	1.43145	0.0164745	0.199472	1.78319	DDX5//HIVEP1//HOXD8//SMARCA2//SNAI1//STAT3//TLE4//TRAF6//UBE2I//ZNF174//FZD8//HAND1//NCOR2//HDAC9//SPEN//SIRT1//NSD1//ZBTB10//OSR1//HES5//SMARCA5//GNAI2//GALR1//GRM3//NAB2//MAF1//GCLC//IRAK1//PTPRK//SFRP2//TSG101//EED//RASD1//TSHZ3//SNX6//PRICKLE1//CDK9//CCL5
GO:0014743	regulation of muscle hypertrophy	Biological process	3	18	454	14742	5.41189	0.016781	0.201466	1.77518	P2RX4//RGS2//ADRB1
GO:0072234	metanephric nephron tubule development	Biological process	3	18	454	14742	5.41189	0.016781	0.201466	1.77518	PKD1//HES5//OSR1
GO:0072243	metanephric nephron epithelium development	Biological process	3	18	454	14742	5.41189	0.016781	0.201466	1.77518	PKD1//OSR1//HES5
GO:0006446	regulation of translational initiation	Biological process	5	49	454	14742	3.3134	0.0169851	0.201858	1.76993	EIF2AK3//EIF2C2//CCL5//EIF4G2//EIF5B
GO:0006953	acute-phase response	Biological process	5	49	454	14742	3.3134	0.0169851	0.201858	1.76993	IL1A//PTGER3//CCL5//AHSG//STAT3
GO:0043547	positive regulation of GTPase activity	Biological process	10	149	454	14742	2.17929	0.017003	0.201858	1.76947	RASA1//TBC1D10B//GSK3B//DOCK4//ALS2//DOCK7//BNIP2//GNAO1//RGS2//RGS10
GO:0050890	cognition	Biological process	10	149	454	14742	2.17929	0.017003	0.201858	1.76947	LHX8//GRM5//SLC24A2//ADRB1//VLDLR//ADRA1B//APP//TTC8//HOXA1//TUSC3
GO:0007266	Rho protein signal transduction	Biological process	12	194	454	14742	2.00854	0.0171422	0.202944	1.76593	FGD1//SOS2//MCF2L//FGD6//ALS2//FGD4//FGD5//ADRB1//RHOB
GO:0010941	regulation of cell death	Biological process	50	1200	454	14742	1.35297	0.0173126	0.204395	1.76164	PVRL2//BNIP2//GCLC//IKBKB//IL1A//IRAK1//PAFAH2//TRAF6//BECN1//AVEN//BIRC6//APP//COL4A3//STK17B//FGD1//MAP3K5//SOS2//FASTK//MCF2L//FGD4//PPP3R1//CUL2//SFRP2//FGFR3//JAG2//LYN//P2RX4//SIRT1//MAPK9//APBB1//RHOB//HOXA5//NEUROD1//ACVR1//CAT//FGF4//GSK3B//HPN//SERPINE1//SNAI1//OSR1//MARK4//ERBB3//RASA1//SIX1//TOX3//MAP3K11//CCL5//ARRB2//DDX5
GO:0050877	neurological system process	Biological process	48	1145	454	14742	1.36125	0.0176833	0.208194	1.75244	PEBP1//ADRA1B//TSHZ3//AP2A1//CACNB2//AP2M1//EPB41L1//GABRB1//GNAI2//GNG10//GRM3//GRM5//KCNJ3//NEFL//SYPL1//RPS6KA6//MINK1//SLC24A2//VSX1//RDH12//COL4A3//HOXA1//TIMM10//LHX8//ADRB1//VLDLR//CLDN11//APP//CADPS//FKBP1B//P2RX4//C11ORF9//HES5//EIF2AK3//NAB2//SCN2A//SCN8A//QKI//DPYSL2//PXK//LGI1//TUSC3//TTC8//HOXD10//HPN//TRPA1//IL1A//EPHB2
GO:0072080	nephron tubule development	Biological process	4	33	454	14742	3.93592	0.0179262	0.210287	1.74651	HES5//OSR1//SIX1//PKD1
GO:0008015	blood circulation	Biological process	16	290	454	14742	1.79152	0.0179597	0.210287	1.7457	ADRA1B//ADRB1//PEBP1//SEMA3A//ECE1//GNAO1//P2RX4//FKBP1B//AMOT//GCLC//ACTC1//RGS2//COL4A3//EPB41//TBC1D8//DLL4
GO:0046578	regulation of Ras protein signal transduction	Biological process	15	266	454	14742	1.83109	0.0180531	0.210801	1.74345	IQSEC1//TBC1D10B//RASA1//GSK3B//DOCK4//ALS2//DOCK7//FGD1//SOS2//MCF2L//FGD6//FGD4//FGD5//ITPKB//DGKZ
GO:0042509	regulation of tyrosine phosphorylation of STAT protein	Biological process	5	50	454	14742	3.24714	0.0184096	0.214376	1.73496	FGFR3//HES5//SOCS1//LYN//CCL5
GO:0003013	circulatory system process	Biological process	16	291	454	14742	1.78537	0.0184873	0.214695	1.73313	ADRA1B//ADRB1//PEBP1//SEMA3A//ECE1//COL4A3//EPB41//TBC1D8//DLL4//GNAO1//P2RX4//FKBP1B//AMOT//GCLC//ACTC1//RGS2
GO:0071216	cellular response to biotic stimulus	Biological process	7	88	454	14742	2.58295	0.018746	0.217108	1.72709	GSK3B//EIF2AK3//IRAK1//LYN//CCL5//SERPINE1//VLDLR
GO:0030308	negative regulation of cell growth	Biological process	9	130	454	14742	2.24802	0.019139	0.221058	1.71808	SEMA3F//SEMA3A//AHSG//APBB1//RRAD//SFRP2//SMARCA2//SIRT1//CAPRIN2
GO:0048704	embryonic skeletal system morphogenesis	Biological process	6	69	454	14742	2.8236	0.0193237	0.221887	1.71391	OSR1//SIX1//HOXA1//HOXA5//HOXB6//HOXD10
GO:0001958	endochondral ossification	Biological process	3	19	454	14742	5.12706	0.0194809	0.221887	1.71039	COL13A1//FGFR3//NAB2
GO:0002026	regulation of the force of heart contraction	Biological process	3	19	454	14742	5.12706	0.0194809	0.221887	1.71039	ADRA1B//ADRB1//PEBP1
GO:0036075	replacement ossification	Biological process	3	19	454	14742	5.12706	0.0194809	0.221887	1.71039	COL13A1//FGFR3//NAB2
GO:0072170	metanephric tubule development	Biological process	3	19	454	14742	5.12706	0.0194809	0.221887	1.71039	PKD1//OSR1//HES5
GO:0006979	response to oxidative stress	Biological process	13	221	454	14742	1.91008	0.0195752	0.221887	1.70829	CAT//SERPINE1//PTPRK//GNAO1//ADAM9//TRPA1//RHOB//MAP3K5//SIRT1//CCL5//GCLC//HMOX2//PEBP1
GO:0033365	protein localization to organelle	Biological process	22	444	454	14742	1.60894	0.0196296	0.221887	1.70709	TRIP11//SLC11A1//PKD1//RANBP2//STAT3//IPO7//PRICKLE1//KPNA2//SRP14//KDELR1//NAGPA//TIMM10//ZFYVE9//SIRT1//IRS1//PPP3R1//SIX1//SFRP2//BAMBI//PEX3//GSK3B//TNKS2
GO:0000910	cytokinesis	Biological process	7	89	454	14742	2.55393	0.0198268	0.221887	1.70275	BIRC6//RHOB//KIF23//RASA1//BECN1//ZFYVE26//SEPT3
GO:0033500	carbohydrate homeostasis	Biological process	7	89	454	14742	2.55393	0.0198268	0.221887	1.70275	SIRT1//ADRA1B//IRS1//NEUROD1//SERPINE1//SLC2A4//STAT3
GO:0042593	glucose homeostasis	Biological process	7	89	454	14742	2.55393	0.0198268	0.221887	1.70275	SIRT1//ADRA1B//IRS1//NEUROD1//SERPINE1//SLC2A4//STAT3
GO:0050771	negative regulation of axonogenesis	Biological process	4	34	454	14742	3.82016	0.0198355	0.221887	1.70256	SEMA3F//SEMA3A//OMG//RTN4R
GO:0061326	renal tubule development	Biological process	4	34	454	14742	3.82016	0.0198355	0.221887	1.70256	HES5//OSR1//SIX1//PKD1
GO:0030198	extracellular matrix organization	Biological process	9	131	454	14742	2.23086	0.0200134	0.222708	1.69868	DDR1//FAP//SFRP2//COL4A3//HPN//MYH11//TNXB//APP//KAZALD1
GO:0043062	extracellular structure organization	Biological process	9	131	454	14742	2.23086	0.0200134	0.222708	1.69868	DDR1//FAP//APP//KAZALD1//SFRP2//COL4A3//HPN//MYH11//TNXB
GO:0007507	heart development	Biological process	18	344	454	14742	1.69908	0.0204033	0.226456	1.6903	HAND1//SFRP2//SIX1//ERBB3//ADRA1B//GJA5//MYH11//ACTC1//ADRB1//PRICKLE1//ACVR1//ECE1//PAM//PKD1//PPP3R1//VLDLR//HDAC9//OSR1
GO:0048646	anatomical structure formation involved in morphogenesis	Biological process	32	712	454	14742	1.45939	0.0208288	0.230217	1.68134	EPHB2//GJA5//SERPINE1//SAT1//SH2D2A//HAND1//SIRT1//DLL4//ACVR1//PPP3R1//SFRP2//PVRL2//SNAI1//HOXA11//SIX1//PRICKLE1//COL4A3//HOXA5//AMOT//HOXA1//ACTC1//MYH11//ADAM9//TTC8//RHOB//IL1A//CCL5//SLC40A1//HES5//OSR1//HDAC9//CTHRC1
GO:0019941	modification-dependent protein catabolic process	Biological process	19	370	454	14742	1.66745	0.0208532	0.230217	1.68083	ARIH2//FBXL14//UBE2I//CUL2//USP44//USP48//USP27X//DERL2//NPLOC4//TGFB1I1//GCLC//TRIB2//PRICKLE1//ARRB2//SIRT1//ZNRF1//TRIM9//TSG101//CHFR
GO:0032318	regulation of Ras GTPase activity	Biological process	10	154	454	14742	2.10853	0.0209042	0.230217	1.67977	TBC1D10B//RASA1//GSK3B//DOCK4//ALS2//DOCK7//FGD1//FGD6//FGD4//FGD5
GO:0006810	transport	Biological process	123	3387	454	14742	1.17921	0.0210109	0.230561	1.67756	TRIP11//SLC11A1//P2RX4//ARRB2//LYN//APP//FGB//SERPINE1//PKD1//AP2M1//AP3S1//VAMP3//GOSR1//SEC23A//KDELR1//RANBP2//STAT3//IPO7//PRICKLE1//SRRM1//KPNA2//TAOK2//SRP14//NAGPA//TIMM10//CACNB2//KCNJ3//SCN2A//SCN8A//SCN9A//TRPA1//SLC24A2//CNNM3//SLC40A1//GPR89B//TRPM4//TRPV6//SLC7A10//CACHD1//SLC4A9//SLC5A11//GPR89A//ATP2A2//KCTD3//KCTD5//SLC10A3//CCL5//GABRB1//STARD3//SLC25A12//SORL1//VLDLR//AP2A1//CTS…
GO:0032868	response to insulin stimulus	Biological process	14	247	454	14742	1.84048	0.0210437	0.230561	1.67688	AP3S1//FGF4//FGFR3//IRS1//PTPN2//AHSG//ERBB3//SLC2A4//VLDLR//HDAC9//SOCS1//SIRT1//LYN//CCL5
GO:0045444	fat cell differentiation	Biological process	8	111	454	14742	2.34028	0.0213125	0.232907	1.67137	SIRT1//TRIB2//SFRP2//ADRB1//RGS2//SLC2A4//SOCS1//EIF2AK3
GO:0001707	mesoderm formation	Biological process	5	52	454	14742	3.12225	0.0214896	0.234243	1.66777	HOXA11//SFRP2//ACVR1//SNAI1//HAND1
GO:0033554	cellular response to stress	Biological process	45	1075	454	14742	1.35927	0.0217684	0.236073	1.66217	SIRT1//BECN1//CDK7//MORF4L1//ZFYVE26//CHAF1A//EPC2//UHRF1//REV1//C9ORF80//POLN//CDK9//SMARCA5//APBB1//LYN//TAOK2//MASTL//RPS6KA6//GSK3B//EIF2AK3//FGF14//IRAK1//MAP3K5//MAP3K11//MAPK9//MAPK10//TRAF6//MAP3K12//MINK1//MAP3K9//SPAG9//FGD4//TNRC6A//DERL2//OMG//DGKZ//IL1A//PTPRK//VLDLR//CAT//SFRP2//DDX5//SNAI1//RHOB//CCL5
GO:0051128	regulation of cellular component organization	Biological process	45	1075	454	14742	1.35927	0.0217684	0.236073	1.66217	DDR1//TSG101//TAOK2//KAZALD1//MAP2//FGD1//HPN//RASA1//BAMBI//SH3KBP1//FGD6//FGD4//FGD5//FAP//SNAI1//TGFB1I1//SFRP2//LYN//EHD4//LGI1//DERL2//AHSG//APBB1//RRAD//SMARCA2//SIRT1//CAPRIN2//CDK9//GSK3B//TNKS2//ADAM9//IL1A//PEBP1//SERPINE1//OMG//SEMA3A//SEMA3F//PTX3//SLC11A1//RTN4R//AMOT//EPHB2//USP44//ADRB1//SACS
GO:0032869	cellular response to insulin stimulus	Biological process	12	201	454	14742	1.93859	0.0219657	0.237609	1.65825	AP3S1//FGF4//FGFR3//IRS1//PTPN2//AHSG//SOCS1//SIRT1//ERBB3//SLC2A4//VLDLR//HDAC9
GO:0045926	negative regulation of growth	Biological process	11	178	454	14742	2.00666	0.0220552	0.237973	1.65649	AHSG//APBB1//RRAD//SFRP2//SMARCA2//SIRT1//CAPRIN2//ADRB1//FGFR3//SEMA3F//SEMA3A
GO:0060828	regulation of canonical Wnt receptor signaling pathway	Biological process	8	112	454	14742	2.31938	0.0223587	0.239224	1.65055	GSK3B//SFRP2//CTHRC1//PRICKLE1//BAMBI//TRPM4//CAPRIN2//TNKS2
GO:0003016	respiratory system process	Biological process	3	20	454	14742	4.8707	0.0224059	0.239224	1.64964	TSHZ3//HOXA5//JAG2
GO:0010718	positive regulation of epithelial to mesenchymal transition	Biological process	3	20	454	14742	4.8707	0.0224059	0.239224	1.64964	SNAI1//TGFB1I1//BAMBI
GO:0043631	RNA polyadenylation	Biological process	3	20	454	14742	4.8707	0.0224059	0.239224	1.64964	APP//CSTF2//CPSF6
GO:0043632	modification-dependent macromolecule catabolic process	Biological process	19	373	454	14742	1.65404	0.0224518	0.239224	1.64875	CHFR//ARIH2//FBXL14//UBE2I//CUL2//USP44//USP48//USP27X//DERL2//NPLOC4//TGFB1I1//GCLC//TRIB2//PRICKLE1//ARRB2//SIRT1//ZNRF1//TRIM9//TSG101
GO:0033036	macromolecule localization	Biological process	66	1683	454	14742	1.27339	0.0228546	0.242487	1.64103	TRIP11//SLC11A1//PKD1//RANBP2//STAT3//IPO7//PRICKLE1//SRRM1//KPNA2//TAOK2//SRP14//KDELR1//NAGPA//TIMM10//SORL1//VLDLR//STARD3//AP2A1//AP2M1//AP3S1//CTSA//SEC23A//SNX6//ZFYVE9//SIRT1//RHOB//ARRB2//TSG101//CADPS//VAMP3//GOSR1//NUP153//SCAMP2//TRIM3//LMAN2//RAB32//RAB21//RAB38//GPR89B//SDAD1//SNX21//NUP35//VPS37D//MIA3//GPR89A//DERL2//P2RX4//PTPRK//IRS1//PPP3R1//SIX1//AMOT//SFRP2//BAMBI//TST//PEX3//…
GO:0071375	cellular response to peptide hormone stimulus	Biological process	15	274	454	14742	1.77763	0.0228719	0.242487	1.6407	AP3S1//FGF4//FGFR3//IRS1//PTPN2//AHSG//ERBB3//SLC2A4//VLDLR//HDAC9//SOCS1//SIRT1//STAT3//LYN//GNG10
GO:0034134	toll-like receptor 2 signaling pathway	Biological process	6	72	454	14742	2.70595	0.0233387	0.246823	1.63192	LYN//IKBKB//IRAK1//MAPK9//MAPK10//TRAF6
GO:0042692	muscle cell differentiation	Biological process	13	227	454	14742	1.85959	0.0237795	0.250862	1.6238	CACNB2//ACTC1//MYH11//SMARCA2//HDAC9//APP//ACVR1//BNIP2//SPAG9//ADRB1//SIX1//DDX5//QKI
GO:0060048	cardiac muscle contraction	Biological process	4	36	454	14742	3.60793	0.0240179	0.252129	1.61947	FKBP1B//P2RX4//RGS2//ACTC1
GO:0060350	endochondral bone morphogenesis	Biological process	4	36	454	14742	3.60793	0.0240179	0.252129	1.61947	COL13A1//FGFR3//NAB2//HOXA11
GO:0045088	regulation of innate immune response	Biological process	12	204	454	14742	1.91008	0.0243149	0.254619	1.61413	IKBKB//IRAK1//MAPK9//MAPK10//TRAF6//PVRL2//LYN//CCL5//ARRB2//PTPN2//SOCS1//IFNAR2
GO:0016192	vesicle-mediated transport	Biological process	38	887	454	14742	1.39111	0.0245514	0.255542	1.60992	TRIP11//ARRB2//LYN//APP//FGB//SERPINE1//CCL5//CADPS//VAMP3//MIA3//GOSR1//SEC23A//SCAMP2//AP2A1//DNM1//TRIP10//ZFYVE9//SH3KBP1//LMBR1L//M6PR//SORL1//VLDLR//AHSG//EHD4//SLC11A1//PTX3//RHOB//TSG101//VPS37D//TRPV6//SPAG9//SNX6//PIK3CD//DPYSL2//SYT6//AP2M1//AP3S1//KDELR1
GO:0055086	nucleobase-containing small molecule metabolic process	Biological process	38	887	454	14742	1.39111	0.0245514	0.255542	1.60992	CAT//RHOB//DNM1//GNAI2//GNAO1//GNG10//RRAD//GNB5//RAB21//RAB38//RND1//RASD1//ACTC1//SMARCA5//DPYSL2//DPYSL5//ENTPD4//ATP2A2//ADRB1//GALR1//GRM3//SMARCAD1//PDE8A//TBC1D10B//RASA1//PXK//GSK3B//DOCK4//ALS2//DOCK7//FGD1//FGD6//FGD4//FGD5//BNIP2//RGS2//RGS10//UHRF1
GO:0001763	morphogenesis of a branching structure	Biological process	11	181	454	14742	1.9734	0.0245829	0.255542	1.60937	ACVR1//PPP3R1//SFRP2//HOXA11//SIX1//PKD1//HOXA5//DDR1//SEMA3A//NTN4//COL13A1
GO:0007260	tyrosine phosphorylation of STAT protein	Biological process	5	54	454	14742	3.00661	0.0248868	0.257672	1.60403	FGFR3//HES5//SOCS1//LYN//CCL5
GO:0048568	embryonic organ development	Biological process	15	277	454	14742	1.75838	0.0249087	0.257672	1.60365	PKD1//OSR1//EPHB2//OTX1//SIX1//HOXA1//NEUROD1//HOXA5//HOXB6//HOXD10//SNAI1//HAND1//BIRC6//HPN//CTHRC1
GO:0002009	morphogenesis of an epithelium	Biological process	16	302	454	14742	1.72034	0.0251053	0.259077	1.60023	ACVR1//PPP3R1//SFRP2//HOXA11//SIX1//PRICKLE1//HAND1//JAG2//CTHRC1//HOXA5//DDR1//SEMA3A//NTN4//HES5//OSR1//PKD1
GO:0010769	regulation of cell morphogenesis involved in differentiation	Biological process	10	159	454	14742	2.04222	0.0254209	0.259337	1.59481	SNAI1//TGFB1I1//BAMBI//HPN//SFRP2//OMG//SEMA3A//SEMA3F//RTN4R//CAPRIN2
GO:0048562	embryonic organ morphogenesis	Biological process	11	182	454	14742	1.96256	0.0254705	0.259337	1.59396	OSR1//EPHB2//OTX1//SIX1//HOXA1//HOXA5//HOXB6//HOXD10//HPN//CTHRC1//NEUROD1
GO:0001823	mesonephros development	Biological process	3	21	454	14742	4.63877	0.0255565	0.259337	1.5925	PKD1//OSR1//SIX1
GO:0002548	monocyte chemotaxis	Biological process	3	21	454	14742	4.63877	0.0255565	0.259337	1.5925	LYN//SERPINE1//CCL5
GO:0046627	negative regulation of insulin receptor signaling pathway	Biological process	3	21	454	14742	4.63877	0.0255565	0.259337	1.5925	AHSG//IRS1//SOCS1
GO:0072207	metanephric epithelium development	Biological process	3	21	454	14742	4.63877	0.0255565	0.259337	1.5925	PKD1//OSR1//HES5
GO:1900077	negative regulation of cellular response to insulin stimulus	Biological process	3	21	454	14742	4.63877	0.0255565	0.259337	1.5925	AHSG//IRS1//SOCS1
GO:0040013	negative regulation of locomotion	Biological process	8	115	454	14742	2.25888	0.025714	0.260316	1.58983	SEMA3A//SERPINE1//PTPRK//SFRP2//MIA3//DLL4//SEMA3F//GRM5
GO:0016358	dendrite development	Biological process	7	94	454	14742	2.41808	0.0258873	0.261254	1.58691	MAP2//KLF7//MINK1//CAPRIN2//EPHB2//APP//RELN
GO:0040012	regulation of locomotion	Biological process	19	379	454	14742	1.62785	0.0259292	0.261254	1.58621	MIA3//SEMA3A//CCL5//SERPINE1//JAG2//LAMA3//MINK1//AMOT//IRS1//SNAI1//SPAG9//PTPRK//SFRP2//GRM5//DLL4//SEMA3F//ADAM9//LYN//HDAC9
GO:0031124	mRNA 3'-end processing	Biological process	6	74	454	14742	2.63281	0.0263055	0.263798	1.57995	TNKS1BP1//PAN3//APP//CSTF2//CPSF6//SRRM1
GO:0045766	positive regulation of angiogenesis	Biological process	6	74	454	14742	2.63281	0.0263055	0.263798	1.57995	HDAC9//RHOB//IL1A//SERPINE1//CCL5//SFRP2
GO:0070304	positive regulation of stress-activated protein kinase signaling cascade	Biological process	5	55	454	14742	2.95194	0.0267074	0.267199	1.57337	TAOK2//IL1A//MAP3K11//MINK1//LYN
GO:0040007	growth	Biological process	32	727	454	14742	1.42928	0.0269378	0.268873	1.56964	ADRA1B//DDX5//DDR1//TSG101//TAOK2//KAZALD1//FGFR3//HPN//SFRP2//LGI1//DERL2//AHSG//APBB1//RRAD//SMARCA2//SIRT1//CAPRIN2//HOXA5//SOCS1//MORF4L1//APP//STAT3//TNKS2//ADRB1//SERPINE1//ARIH2//HOXA11//PYGO2//OMG//SEMA3A//SEMA3F//SIX1
GO:0048638	regulation of developmental growth	Biological process	7	95	454	14742	2.39263	0.0272356	0.271211	1.56486	FGFR3//OMG//SEMA3A//SEMA3F//ADRB1//SIX1//SFRP2
GO:0035023	regulation of Rho protein signal transduction	Biological process	10	161	454	14742	2.01686	0.0274103	0.272314	1.56209	GSK3B//DOCK4//ALS2//DOCK7//FGD1//FGD6//FGD4//FGD5//SOS2//MCF2L
GO:0006753	nucleoside phosphate metabolic process	Biological process	36	840	454	14742	1.39163	0.0280394	0.276965	1.55223	RHOB//DNM1//GNAI2//GNAO1//GNG10//RRAD//GNB5//RAB21//RAB38//RND1//RASD1//CAT//ACTC1//SMARCA5//ENTPD4//ATP2A2//ADRB1//GALR1//GRM3//SMARCAD1//PDE8A//TBC1D10B//RASA1//PXK//GSK3B//DOCK4//ALS2//DOCK7//FGD1//FGD6//FGD4//FGD5//BNIP2//RGS2//RGS10//UHRF1
GO:0009117	nucleotide metabolic process	Biological process	36	840	454	14742	1.39163	0.0280394	0.276965	1.55223	RHOB//DNM1//GNAI2//GNAO1//GNG10//RRAD//GNB5//RAB21//RAB38//RND1//RASD1//CAT//ACTC1//SMARCA5//ENTPD4//ATP2A2//ADRB1//GALR1//GRM3//PDE8A//TBC1D10B//RASA1//PXK//GSK3B//DOCK4//ALS2//DOCK7//FGD1//FGD6//FGD4//FGD5//BNIP2//RGS2//RGS10//UHRF1//SMARCAD1
GO:0045765	regulation of angiogenesis	Biological process	9	139	454	14742	2.10246	0.0280734	0.276965	1.55171	COL4A3//HOXA5//AMOT//RHOB//IL1A//SERPINE1//CCL5//SFRP2//HDAC9
GO:0030334	regulation of cell migration	Biological process	17	332	454	14742	1.66269	0.0285024	0.280548	1.54512	MIA3//SEMA3A//CCL5//SERPINE1//IRS1//SNAI1//SPAG9//PTPRK//SFRP2//AMOT//DLL4//ADAM9//LYN//HDAC9//JAG2//LAMA3//MINK1
GO:0048332	mesoderm morphogenesis	Biological process	5	56	454	14742	2.89923	0.0286107	0.280965	1.54347	ACVR1//SNAI1//HAND1//HOXA11//SFRP2
GO:0016925	protein sumoylation	Biological process	3	22	454	14742	4.42791	0.028932	0.281525	1.53862	RANBP2//UBE2I//TRPM4
GO:0043516	regulation of DNA damage response, signal transduction by p53 class mediator	Biological process	3	22	454	14742	4.42791	0.028932	0.281525	1.53862	DDX5//SNAI1//SIRT1
GO:0048640	negative regulation of developmental growth	Biological process	3	22	454	14742	4.42791	0.028932	0.281525	1.53862	SEMA3F//SEMA3A//FGFR3
GO:0050766	positive regulation of phagocytosis	Biological process	3	22	454	14742	4.42791	0.028932	0.281525	1.53862	AHSG//PTX3//SLC11A1
GO:0007389	pattern specification process	Biological process	19	385	454	14742	1.60248	0.0298008	0.288662	1.52577	ACVR1//PPP3R1//SFRP2//HOXA11//SIX1//HAND1//HOXB6//HOXD8//HOXA1//HOXA5//HOXD10//NEUROD1//OTX1//RELN//TTC8//SNAI1//HES5//OSR1//FOXQ1
GO:0051603	proteolysis involved in cellular protein catabolic process	Biological process	19	385	454	14742	1.60248	0.0298008	0.288662	1.52577	CHFR//ARIH2//FBXL14//UBE2I//CUL2//USP44//USP48//USP27X//DERL2//NPLOC4//TGFB1I1//GCLC//TRIB2//PRICKLE1//ARRB2//SIRT1//ZNRF1//TRIM9//TSG101
GO:0043085	positive regulation of catalytic activity	Biological process	39	929	454	14742	1.36317	0.0302461	0.291781	1.51933	GRM5//GNAI2//MAP3K5//ADAM9//TAOK2//IRAK1//MAP3K9//MAP3K11//MAPK10//TRAF6//COL4A3//EIF2AK3//ADRB1//GALR1//DGKZ//SPAG9//FGD4//FGFR3//CCL5//PKD1//SLC11A1//RASA1//TBC1D10B//GSK3B//DOCK4//ALS2//DOCK7//SIRT1//FOXQ1//BNIP2//GNAO1//RGS2//RGS10//IRS1//RELN//VLDLR//ERBB3//UHRF1//CTSA
GO:0031644	regulation of neurological system process	Biological process	11	187	454	14742	1.91008	0.0302598	0.291781	1.51913	HES5//EIF2AK3//C11ORF9//GRM5//GRM3//PXK//GNAI2//LGI1//IL1A//SLC24A2//PEBP1
GO:0043066	negative regulation of apoptotic process	Biological process	26	571	454	14742	1.47856	0.0305084	0.293514	1.51558	BNIP2//GCLC//IKBKB//IL1A//IRAK1//PAFAH2//TRAF6//BECN1//AVEN//BIRC6//SFRP2//ERBB3//RASA1//SIX1//TOX3//SIRT1//CCL5//ACVR1//CAT//FGF4//GSK3B//HPN//NEUROD1//SERPINE1//SNAI1//OSR1
GO:0040029	regulation of gene expression, epigenetic	Biological process	8	119	454	14742	2.18295	0.0307131	0.294156	1.51268	SMARCA5//SIRT1//TRDMT1//ARID1A//EED//SNIP1//EIF2C2//TNRC6A
GO:0050730	regulation of peptidyl-tyrosine phosphorylation	Biological process	8	119	454	14742	2.18295	0.0307131	0.294156	1.51268	CCL5//FGFR3//HES5//SOCS1//LYN//RELN//EHD4//SFRP2
GO:0070838	divalent metal ion transport	Biological process	14	260	454	14742	1.74846	0.0308368	0.294678	1.51093	CACNB2//PKD1//CCL5//TRPV6//CACHD1//P2RX4//FKBP1B//TUSC3//LYN//GNAO1//GNAI2//ADRB1//ATP2A2//SLC11A1
GO:0072521	purine-containing compound metabolic process	Biological process	33	763	454	14742	1.4044	0.0309091	0.294708	1.50991	CAT//RHOB//DNM1//GNAI2//GNAO1//GNG10//RRAD//GNB5//RAB21//RAB38//RND1//RASD1//ACTC1//SMARCA5//ATP2A2//ADRB1//GALR1//GRM3//TBC1D10B//RASA1//PXK//GSK3B//DOCK4//ALS2//DOCK7//FGD1//FGD6//FGD4//FGD5//BNIP2//RGS2//RGS10//UHRF1
GO:0002456	T cell mediated immunity	Biological process	4	39	454	14742	3.3304	0.0312226	0.296351	1.50553	SLC11A1//TRPM4//TRAF6//PVRL2
GO:0045768	positive regulation of anti-apoptosis	Biological process	4	39	454	14742	3.3304	0.0312226	0.296351	1.50553	RASA1//SFRP2//SIRT1//TOX3
GO:0043269	regulation of ion transport	Biological process	11	188	454	14742	1.89992	0.0312899	0.296351	1.5046	P2RX4//FKBP1B//STK39//PXK//GPR89A//LYN//CACNB2//GNAO1//GNAI2//CCL5//ADRB1
GO:0030326	embryonic limb morphogenesis	Biological process	7	98	454	14742	2.31938	0.0315649	0.297011	1.50079	OSR1//FGF4//ECE1//HOXA11//SFRP2//GJA5//HOXD10
GO:0035113	embryonic appendage morphogenesis	Biological process	7	98	454	14742	2.31938	0.0315649	0.297011	1.50079	GJA5//HOXA11//HOXD10//OSR1//FGF4//ECE1//SFRP2
GO:0009056	catabolic process	Biological process	72	1890	454	14742	1.237	0.0316307	0.297011	1.49989	BECN1//TST//PAN3//CHFR//ARIH2//FBXL14//TNKS1BP1//CDK7//ADRB1//PGM1//PFKFB3//PFKP//RHOB//DNM1//GNAI2//GNAO1//GNG10//RRAD//GNB5//RAB21//RAB38//RND1//RASD1//CAT//ACTC1//SMARCA5//DPYSL2//DPYSL5//ENTPD4//FOXQ1//UBE2I//CUL2//USP44//USP48//USP27X//GLDC//CROT//HMOX2//ECE1//IRS1//PAFAH2//PLCB4//DDHD1//SIRT1//DERL2//NPLOC4//TGFB1I1//TBC1D10B//RASA1//GCLC//TRIB2//PRICKLE1//PXK//GSK3B//DOCK4//ALS2//DOCK7//FG…
GO:0042221	response to chemical stimulus	Biological process	97	2641	454	14742	1.19262	0.0316895	0.297011	1.49908	CAT//SERPINE1//NCOA1//ECE1//HMOX2//IL1A//PAM//DDIT4//IRAK1//ADRA1B//TRDMT1//DPYSL2//CCL5//TRPM4//PIK3CD//HSPA6//EIF2AK3//DERL2//GCLC//CCBP2//L1CAM//CCL1//AMOT//PEBP1//SIRT1//AP2A1//RHOB//CACNB2//AP2M1//COL4A3//COL9A3//EPHB2//GSK3B//MYH11//RELN//SCN8A//SEMA3F//SOS2//KLF7//LGI1//SEMA3A//RND1//RPS6KA6//DPYSL5//NTN4//GNAI2//VLDLR//HOXA1//AP3S1//FGF4//FGFR3//IRS1//PTPN2//ACTC1//ERBB3//GNAO1//LYN//NEUR…
GO:0035239	tube morphogenesis	Biological process	14	261	454	14742	1.74176	0.0317082	0.297011	1.49883	ACVR1//PPP3R1//SFRP2//HOXA11//SIX1//PRICKLE1//HAND1//PKD1//HOXA5//DDR1//HOXA1//HES5//OSR1//CTHRC1
GO:0007369	gastrulation	Biological process	8	120	454	14742	2.16476	0.0320601	0.298993	1.49404	ACVR1//NSD1//AMOT//SNAI1//HAND1//HOXA11//SFRP2//OSR1
GO:0008624	induction of apoptosis by extracellular signals	Biological process	8	120	454	14742	2.16476	0.0320601	0.298993	1.49404	MAPK9//FGD1//MAP3K5//SOS2//TRAF6//FASTK//MCF2L//FGD4
GO:0043068	positive regulation of programmed cell death	Biological process	26	574	454	14742	1.47083	0.0322339	0.299456	1.49169	PVRL2//APP//COL4A3//STK17B//FGD1//MAP3K5//SOS2//TRAF6//FASTK//MCF2L//FGD4//PPP3R1//CUL2//MAPK9//SIRT1//APBB1//RHOB//HOXA5//NEUROD1//SFRP2//MAP3K11//ARRB2//CCL5//DDX5//LYN//MARK4
GO:0006511	ubiquitin-dependent protein catabolic process	Biological process	18	363	454	14742	1.61015	0.0324997	0.299456	1.48812	ARIH2//FBXL14//DERL2//NPLOC4//TGFB1I1//GCLC//TRIB2//PRICKLE1//ARRB2//UBE2I//SIRT1//ZNRF1//TRIM9//TSG101//USP44//CUL2//USP48//USP27X
GO:0010677	negative regulation of cellular carbohydrate metabolic process	Biological process	3	23	454	14742	4.2354	0.0325312	0.299456	1.4877	GSK3B//ADRA1B//DDIT4
GO:0014072	response to isoquinoline alkaloid	Biological process	3	23	454	14742	4.2354	0.0325312	0.299456	1.4877	ADRA1B//GNAO1//CCL5
GO:0043278	response to morphine	Biological process	3	23	454	14742	4.2354	0.0325312	0.299456	1.4877	CCL5//ADRA1B//GNAO1
GO:0045912	negative regulation of carbohydrate metabolic process	Biological process	3	23	454	14742	4.2354	0.0325312	0.299456	1.4877	GSK3B//ADRA1B//DDIT4
GO:0035335	peptidyl-tyrosine dephosphorylation	Biological process	5	58	454	14742	2.79926	0.0326695	0.300081	1.48586	PTPN2//PTPN13//PTPRK//DUSP11//MTMR3
GO:0048588	developmental cell growth	Biological process	6	78	454	14742	2.4978	0.0329662	0.302155	1.48193	APP//OMG//SEMA3A//SEMA3F//ADRB1//ARIH2
GO:0042471	ear morphogenesis	Biological process	7	99	454	14742	2.29596	0.0331048	0.302774	1.48011	EPHB2//OTX1//SIX1//HOXA1//OSR1//HPN//CTHRC1
GO:0043069	negative regulation of programmed cell death	Biological process	26	576	454	14742	1.46572	0.0334248	0.305046	1.47593	BNIP2//GCLC//IKBKB//IL1A//IRAK1//PAFAH2//TRAF6//BECN1//AVEN//BIRC6//SFRP2//ACVR1//CAT//FGF4//GSK3B//HPN//NEUROD1//SERPINE1//SNAI1//SIRT1//OSR1//ERBB3//RASA1//SIX1//TOX3//CCL5
GO:0042733	embryonic digit morphogenesis	Biological process	4	40	454	14742	3.24714	0.0338767	0.307852	1.4701	ECE1//HOXA11//SFRP2//OSR1
GO:0043500	muscle adaptation	Biological process	4	40	454	14742	3.24714	0.0338767	0.307852	1.4701	P2RX4//RGS2//CAMTA2//ADRB1
GO:0006470	protein dephosphorylation	Biological process	9	144	454	14742	2.02946	0.0341378	0.309565	1.46676	PTPN2//PTPN13//PTPRK//DUSP11//MTMR3//PPP3R1//PPP6C//PTPN4//PPM1L
GO:0072511	divalent inorganic cation transport	Biological process	14	264	454	14742	1.72197	0.03443	0.311551	1.46306	CACNB2//PKD1//CCL5//TRPV6//CACHD1//P2RX4//FKBP1B//TUSC3//LYN//GNAO1//GNAI2//ADRB1//ATP2A2//SLC11A1
GO:0007498	mesoderm development	Biological process	7	100	454	14742	2.273	0.034694	0.311967	1.45975	ACVR1//SNAI1//HAND1//HOXA11//SFRP2//OSR1//RPS6KA6
GO:0007219	Notch signaling pathway	Biological process	6	79	454	14742	2.46618	0.0347872	0.311967	1.45858	STAT3//HES5//APP//JAG2//SPEN//DLL4
GO:0002062	chondrocyte differentiation	Biological process	5	59	454	14742	2.75181	0.0348266	0.311967	1.45809	SFRP2//EIF2AK3//HOXA11//FGFR3//OSR1
GO:0014065	phosphatidylinositol 3-kinase cascade	Biological process	5	59	454	14742	2.75181	0.0348266	0.311967	1.45809	CAT//ERBB3//CCL5//IRS1//PIK3CD
GO:0000187	activation of MAPK activity	Biological process	8	122	454	14742	2.12927	0.0348738	0.311967	1.4575	MAP3K5//MAP3K9//MAP3K11//SPAG9//FGD4//IRAK1//MAPK10//TRAF6
GO:0006916	anti-apoptosis	Biological process	14	265	454	14742	1.71547	0.0353737	0.311967	1.45132	RASA1//SFRP2//SIRT1//TOX3//BNIP2//GCLC//IKBKB//IL1A//IRAK1//PAFAH2//TRAF6//BECN1//AVEN//BIRC6
GO:0009888	tissue development	Biological process	45	1111	454	14742	1.31522	0.0354129	0.311967	1.45084	FGF4//PKD1//ACVR1//PPP3R1//SFRP2//HOXA11//SIX1//SNAI1//HAND1//SEMA3F//GSK3B//PRICKLE1//HOXA5//FGFR3//OSR1//EIF2AK3//SLC40A1//ERBB3//HOXD10//CACNB2//ATP2A2//LAMA3//TGFB1I1//BAMBI//HPN//JAG2//TSG101//ADAM9//AHSG//FOXQ1//IL1A//SERPINE1//DDR1//NAB2//MYH11//HDAC9//APP//HES5//ACTC1//CTHRC1//SEMA3A//NTN4//ADRB1//RPS6KA6//DDX5
GO:0010608	posttranscriptional regulation of gene expression	Biological process	16	316	454	14742	1.64412	0.0359258	0.311967	1.44459	APP//RGS2//QKI//METAP1//EIF2C2//TNRC6A//EIF4G2//EIF5B//SNIP1//EIF2AK3//CAPRIN2//SIRT1//SRP14//CCL5//SLC11A1//SYNCRIP
GO:0003084	positive regulation of systemic arterial blood pressure	Biological process	2	10	454	14742	6.49427	0.0361555	0.311967	1.44183	ADRA1B//ADRB1
GO:0006907	pinocytosis	Biological process	2	10	454	14742	6.49427	0.0361555	0.311967	1.44183	AHSG//EHD4
GO:0007216	G-protein coupled glutamate receptor signaling pathway	Biological process	2	10	454	14742	6.49427	0.0361555	0.311967	1.44183	GRM3//GRM5
GO:0007501	mesodermal cell fate specification	Biological process	2	10	454	14742	6.49427	0.0361555	0.311967	1.44183	SFRP2//HOXA11
GO:0022010	central nervous system myelination	Biological process	2	10	454	14742	6.49427	0.0361555	0.311967	1.44183	C11ORF9//HES5
GO:0032291	axon ensheathment in central nervous system	Biological process	2	10	454	14742	6.49427	0.0361555	0.311967	1.44183	C11ORF9//HES5
GO:0035587	purinergic receptor signaling pathway	Biological process	2	10	454	14742	6.49427	0.0361555	0.311967	1.44183	GNAI2//P2RX4
GO:0043518	negative regulation of DNA damage response, signal transduction by p53 class mediator	Biological process	2	10	454	14742	6.49427	0.0361555	0.311967	1.44183	SNAI1//SIRT1
GO:0046426	negative regulation of JAK-STAT cascade	Biological process	2	10	454	14742	6.49427	0.0361555	0.311967	1.44183	SOCS1//NEUROD1
GO:0008333	endosome to lysosome transport	Biological process	3	24	454	14742	4.05892	0.0363525	0.311967	1.43947	RHOB//M6PR//TSG101
GO:0010770	positive regulation of cell morphogenesis involved in differentiation	Biological process	3	24	454	14742	4.05892	0.0363525	0.311967	1.43947	SNAI1//TGFB1I1//BAMBI
GO:0035195	gene silencing by miRNA	Biological process	3	24	454	14742	4.05892	0.0363525	0.311967	1.43947	SNIP1//EIF2C2//TNRC6A
GO:0045058	T cell selection	Biological process	3	24	454	14742	4.05892	0.0363525	0.311967	1.43947	ITPKB//MINK1//JAG2
GO:0090102	cochlea development	Biological process	3	24	454	14742	4.05892	0.0363525	0.311967	1.43947	HOXA1//HPN//CTHRC1
GO:0046777	protein autophosphorylation	Biological process	10	169	454	14742	1.92138	0.0364815	0.311967	1.43793	DDR1//FGFR3//IRAK1//LYN//MAP3K9//MAP3K11//MAP3K12//EIF2AK3//MINK1//STK33
GO:0030512	negative regulation of transforming growth factor beta receptor signaling pathway	Biological process	4	41	454	14742	3.16794	0.0366582	0.311967	1.43583	TGFB1I1//SIRT1//BAMBI//SNX6
GO:0042059	negative regulation of epidermal growth factor receptor signaling pathway	Biological process	4	41	454	14742	3.16794	0.0366582	0.311967	1.43583	SNX6//AP2A1//AP2M1//SH3KBP1
GO:0060416	response to growth hormone stimulus	Biological process	4	41	454	14742	3.16794	0.0366582	0.311967	1.43583	STAT3//IRS1//LYN//SOCS1
GO:0060993	kidney morphogenesis	Biological process	4	41	454	14742	3.16794	0.0366582	0.311967	1.43583	HES5//OSR1//SIX1//PKD1
GO:0072009	nephron epithelium development	Biological process	4	41	454	14742	3.16794	0.0366582	0.311967	1.43583	HES5//OSR1//SIX1//PKD1
GO:0044264	cellular polysaccharide metabolic process	Biological process	6	80	454	14742	2.43535	0.0366718	0.311967	1.43567	GSK3B//PGM1//ADRB1//B3GNT1//IRS1//ADRA1B
GO:0051302	regulation of cell division	Biological process	6	80	454	14742	2.43535	0.0366718	0.311967	1.43567	BIRC6//CAT//FGF4//IL1A//KIF23//SFRP2
GO:0042391	regulation of membrane potential	Biological process	11	193	454	14742	1.8507	0.0368175	0.312582	1.43395	CLDN11//P2RX4//C11ORF9//HES5//EIF2AK3//NAB2//SCN2A//SCN8A//QKI//GCLC//ADRB1
GO:0048813	dendrite morphogenesis	Biological process	5	60	454	14742	2.70595	0.0370699	0.313739	1.43098	CAPRIN2//EPHB2//MAP2//KLF7//MINK1
GO:0044257	cellular protein catabolic process	Biological process	19	395	454	14742	1.56191	0.0371953	0.313739	1.42951	CHFR//ARIH2//FBXL14//UBE2I//CUL2//USP44//USP48//USP27X//DERL2//NPLOC4//TGFB1I1//GCLC//TRIB2//PRICKLE1//ARRB2//SIRT1//ZNRF1//TRIM9//TSG101
GO:0006928	cellular component movement	Biological process	42	1029	454	14742	1.32536	0.037204	0.313739	1.42941	ACVR1//SEMA3F//RELN//CCL5//TRPM4//PIK3CD//MIA3//KIF23//APP//NEFL//ACTC1//SEMA3A//DDR1//SERPINE1//HOXA5//PTPRK//DGKZ//TAOK2//WWC1//BAMBI//SH3KBP1//CTHRC1//JAG2//LAMA3//MINK1//AMOT//IRS1//SNAI1//SPAG9//SFRP2//DLL4//FAP//L1CAM//LYN//SLC7A10//SIX1//ADAM9//ARRB2//DOCK4//HDAC9//STAT3//STRBP
GO:0031347	regulation of defense response	Biological process	18	369	454	14742	1.58397	0.0372482	0.313739	1.42889	IKBKB//IRAK1//MAPK9//MAPK10//TRAF6//CCL5//PVRL2//PTGER3//LYN//SERPINE1//ARRB2//AP2A1//AP2M1//IL28RA//AHSG//PTPN2//SOCS1//IFNAR2
GO:0050767	regulation of neurogenesis	Biological process	17	344	454	14742	1.60469	0.0380017	0.31891	1.4202	LYN//DPYSL2//SIX1//APP//HES5//BNIP2//NEUROD1//CCL5//SPAG9//GRM5//OMG//SEMA3A//SEMA3F//SPEN//RTN4R//CAPRIN2//DLL4
GO:0070372	regulation of ERK1 and ERK2 cascade	Biological process	7	102	454	14742	2.22843	0.0380223	0.31891	1.41996	LYN//RPS6KA6//ARRB2//FGF4//FGFR3//IL1A//ST5
GO:0030036	actin cytoskeleton organization	Biological process	18	370	454	14742	1.57969	0.0380866	0.31891	1.41923	RND1//ACTC1//MYH11//RASA1//EPB41//EPB41L1//CNN1//MINK1//AMOT//FGD1//TNXB//TRIP10//TAOK2//DAAM1//FGD6//FHOD3//FGD4//FGD5
GO:0009792	embryo development ending in birth or egg hatching	Biological process	21	449	454	14742	1.51871	0.0382022	0.319251	1.41791	ACVR1//JAG2//PKD1//ALS2//PYGO2//AMOT//HAND1//SFRP2//PRICKLE1//HES5//OSR1//SIX1//HOXA1//HOXA5//HOXB6//HOXD10//ECE1//SNAI1//BIRC6//CTHRC1//PGM3
GO:0048729	tissue morphogenesis	Biological process	19	397	454	14742	1.55405	0.0388232	0.323805	1.41091	ACVR1//PPP3R1//SFRP2//HOXA11//SIX1//SNAI1//HAND1//PRICKLE1//HOXA5//JAG2//FOXQ1//ACTC1//CTHRC1//DDR1//SEMA3A//NTN4//HES5//OSR1//PKD1
GO:0000122	negative regulation of transcription from RNA polymerase II promoter	Biological process	20	424	454	14742	1.53167	0.039371	0.326697	1.40482	NCOR2//DDX5//HIVEP1//HOXD8//SMARCA2//SNAI1//STAT3//TLE4//TRAF6//UBE2I//ZNF174//FZD8//HAND1//HDAC9//SPEN//SIRT1//NSD1//ZBTB10//OSR1//HES5
GO:0005977	glycogen metabolic process	Biological process	5	61	454	14742	2.66159	0.0393999	0.326697	1.40451	PGM1//ADRB1//GSK3B//IRS1//ADRA1B
GO:0030177	positive regulation of Wnt receptor signaling pathway	Biological process	5	61	454	14742	2.66159	0.0393999	0.326697	1.40451	SFRP2//BAMBI//TRPM4//CAPRIN2//TNKS2
GO:0042531	positive regulation of tyrosine phosphorylation of STAT protein	Biological process	4	42	454	14742	3.09251	0.0395674	0.326815	1.40266	FGFR3//HES5//LYN//CCL5
GO:0070301	cellular response to hydrogen peroxide	Biological process	4	42	454	14742	3.09251	0.0395674	0.326815	1.40266	CAT//RHOB//MAP3K5//SIRT1
GO:0010942	positive regulation of cell death	Biological process	26	586	454	14742	1.44071	0.0398856	0.328805	1.39918	PVRL2//APP//COL4A3//STK17B//FGD1//MAP3K5//SOS2//TRAF6//FASTK//MCF2L//FGD4//PPP3R1//CUL2//MAPK9//SIRT1//APBB1//RHOB//HOXA5//NEUROD1//SFRP2//MARK4//MAP3K11//ARRB2//CCL5//DDX5//LYN
GO:0021517	ventral spinal cord development	Biological process	3	25	454	14742	3.89656	0.0403934	0.331668	1.39369	HOXD10//RELN//VLDLR
GO:0050873	brown fat cell differentiation	Biological process	3	25	454	14742	3.89656	0.0403934	0.331668	1.39369	ADRB1//RGS2//SLC2A4
GO:0007610	behavior	Biological process	21	452	454	14742	1.50863	0.0405488	0.331668	1.39202	APP//LHX8//GRM5//SLC24A2//ADRB1//VLDLR//NHLH2//ADRA1B//GNAO1//RELN//SCN8A//HOXA1//STRBP//HOXD10//CCL5//PEBP1//STAT3//SEMA3A//SEMA3F//LYN//SERPINE1
GO:0042472	inner ear morphogenesis	Biological process	6	82	454	14742	2.37595	0.0406343	0.331668	1.39111	HOXA1//HPN//CTHRC1//EPHB2//OTX1//SIX1
GO:0051270	regulation of cellular component movement	Biological process	18	373	454	14742	1.56698	0.0406845	0.331668	1.39057	MIA3//SEMA3A//CCL5//SERPINE1//JAG2//LAMA3//MINK1//AMOT//IRS1//SNAI1//SPAG9//PTPRK//SFRP2//DLL4//SEMA3F//LYN//ADAM9//HDAC9
GO:0045596	negative regulation of cell differentiation	Biological process	17	347	454	14742	1.59082	0.0406997	0.331668	1.39041	HPN//SFRP2//FGF4//OSR1//SIRT1//TRIB2//HOXA5//APP//HES5//LRRC17//SEMA3F//SEMA3A//OMG//RTN4R//SNAI1//GSK3B//PRICKLE1
GO:0044262	cellular carbohydrate metabolic process	Biological process	24	533	454	14742	1.46213	0.0408614	0.33235	1.38869	GSK3B//PGM1//ADRB1//PFKP//PFKFB3//SLC25A12//CHST1//PGM3//LARGE//CHST2//NAGK//COQ2//ST6GALNAC4//B3GALNT2//TUSC3//POMGNT1//MGAT4B//SIRT1//IRS1//B4GALT6//SEC23A//B3GNT1//ADRA1B//DDIT4
GO:0006073	cellular glucan metabolic process	Biological process	5	62	454	14742	2.61866	0.0418171	0.337419	1.37865	GSK3B//PGM1//ADRB1//IRS1//ADRA1B
GO:0032846	positive regulation of homeostatic process	Biological process	5	62	454	14742	2.61866	0.0418171	0.337419	1.37865	P2RX4//PTGER3//CCL5//TNKS2//AHSG
GO:0035666	TRIF-dependent toll-like receptor signaling pathway	Biological process	5	62	454	14742	2.61866	0.0418171	0.337419	1.37865	IKBKB//IRAK1//MAPK9//MAPK10//TRAF6
GO:0044042	glucan metabolic process	Biological process	5	62	454	14742	2.61866	0.0418171	0.337419	1.37865	GSK3B//PGM1//ADRB1//IRS1//ADRA1B
GO:0016055	Wnt receptor signaling pathway	Biological process	14	272	454	14742	1.67132	0.0425079	0.337419	1.37153	SFRP2//GSK3B//FZD8//CTHRC1//PRICKLE1//BAMBI//TRPM4//CAPRIN2//TNKS2//TGFB1I1//TLE4//CPZ//MARK4//PYGO2
GO:0002821	positive regulation of adaptive immune response	Biological process	4	43	454	14742	3.02059	0.0426045	0.337419	1.37054	TRAF6//SLC11A1//PVRL2//SIRT1
GO:0010463	mesenchymal cell proliferation	Biological process	4	43	454	14742	3.02059	0.0426045	0.337419	1.37054	IRS1//OSR1//SIX1//FGF4
GO:0046847	filopodium assembly	Biological process	4	43	454	14742	3.02059	0.0426045	0.337419	1.37054	FGD1//FGD6//FGD4//FGD5
GO:0042326	negative regulation of phosphorylation	Biological process	6	83	454	14742	2.34733	0.0427131	0.337419	1.36944	LYN//PEBP1//SOCS1//SFRP2//AHSG//SIRT1
GO:0000085	G2 phase of mitotic cell cycle	Biological process	2	11	454	14742	5.90388	0.0433055	0.337419	1.36346	APP//KPNA2
GO:0002063	chondrocyte development	Biological process	2	11	454	14742	5.90388	0.0433055	0.337419	1.36346	SFRP2//EIF2AK3
GO:0010508	positive regulation of autophagy	Biological process	2	11	454	14742	5.90388	0.0433055	0.337419	1.36346	BECN1//SIRT1
GO:0010719	negative regulation of epithelial to mesenchymal transition	Biological process	2	11	454	14742	5.90388	0.0433055	0.337419	1.36346	HPN//SFRP2
GO:0010818	T cell chemotaxis	Biological process	2	11	454	14742	5.90388	0.0433055	0.337419	1.36346	CCL5//PIK3CD
GO:0010837	regulation of keratinocyte proliferation	Biological process	2	11	454	14742	5.90388	0.0433055	0.337419	1.36346	PTPRK//CASK
GO:0031650	regulation of heat generation	Biological process	2	11	454	14742	5.90388	0.0433055	0.337419	1.36346	PTGER3//CCL5
GO:0031652	positive regulation of heat generation	Biological process	2	11	454	14742	5.90388	0.0433055	0.337419	1.36346	PTGER3//CCL5
GO:0045747	positive regulation of Notch signaling pathway	Biological process	2	11	454	14742	5.90388	0.0433055	0.337419	1.36346	STAT3//HES5
GO:0046788	egress of virus within host cell	Biological process	2	11	454	14742	5.90388	0.0433055	0.337419	1.36346	TSG101//VPS37D
GO:0048841	regulation of axon extension involved in axon guidance	Biological process	2	11	454	14742	5.90388	0.0433055	0.337419	1.36346	SEMA3F//SEMA3A
GO:0051319	G2 phase	Biological process	2	11	454	14742	5.90388	0.0433055	0.337419	1.36346	APP//KPNA2
GO:0071425	hemopoietic stem cell proliferation	Biological process	2	11	454	14742	5.90388	0.0433055	0.337419	1.36346	SFRP2//ARIH2
GO:0072176	nephric duct development	Biological process	2	11	454	14742	5.90388	0.0433055	0.337419	1.36346	PKD1//OSR1
GO:2000145	regulation of cell motility	Biological process	17	350	454	14742	1.57718	0.0435336	0.338577	1.36118	MIA3//SEMA3A//CCL5//SERPINE1//JAG2//LAMA3//MINK1//AMOT//IRS1//SNAI1//SPAG9//PTPRK//SFRP2//DLL4//ADAM9//LYN//HDAC9
GO:0032879	regulation of localization	Biological process	46	1157	454	14742	1.291	0.0438674	0.340552	1.35786	P2RX4//MIA3//PKD1//NEUROD1//ADRB1//SEMA3A//CCL5//RANBP2//NUP153//NUP35//SIRT1//FKBP1B//DPYSL2//SERPINE1//ERBB3//IRS1//TRPV6//EHD4//JAG2//LAMA3//MINK1//AMOT//SNAI1//SPAG9//PTPRK//SFRP2//SYNGR3//BAMBI//STK39//PXK//LYN//DLL4//GPR89A//CADPS//GSK3B//SEMA3F//ADAM9//IL1A//AHSG//PTX3//SLC11A1//CACNB2//GNAO1//GNAI2//HDAC9//IRAK1
GO:0048736	appendage development	Biological process	8	128	454	14742	2.02946	0.0443038	0.342211	1.35356	GJA5//HOXA11//HOXD10//OSR1//FGF4//ECE1//SFRP2//PAM
GO:0060173	limb development	Biological process	8	128	454	14742	2.02946	0.0443038	0.342211	1.35356	GJA5//HOXA11//HOXD10//OSR1//FGF4//ECE1//SFRP2//PAM
GO:0034614	cellular response to reactive oxygen species	Biological process	5	63	454	14742	2.57709	0.044322	0.342211	1.35338	CAT//RHOB//MAP3K5//SIRT1//PTPRK
GO:0051969	regulation of transmission of nerve impulse	Biological process	10	175	454	14742	1.85551	0.0445237	0.342806	1.35141	HES5//EIF2AK3//C11ORF9//GRM5//GRM3//PXK//GNAI2//LGI1//SLC24A2//PEBP1
GO:0005980	glycogen catabolic process	Biological process	3	26	454	14742	3.7467	0.0446512	0.342806	1.35017	ADRA1B//ADRB1//PGM1
GO:0043502	regulation of muscle adaptation	Biological process	3	26	454	14742	3.7467	0.0446512	0.342806	1.35017	P2RX4//RGS2//ADRB1
GO:0003002	regionalization	Biological process	14	274	454	14742	1.65912	0.0447208	0.342806	1.34949	HOXA11//SIX1//HOXB6//HOXD8//HOXA1//HOXA5//HOXD10//NEUROD1//OTX1//RELN//SNAI1//HES5//OSR1//SFRP2
GO:0034142	toll-like receptor 4 signaling pathway	Biological process	6	84	454	14742	2.31938	0.0448576	0.343237	1.34816	LYN//IKBKB//IRAK1//MAPK9//MAPK10//TRAF6
GO:0042058	regulation of epidermal growth factor receptor signaling pathway	Biological process	5	64	454	14742	2.53683	0.0469149	0.357695	1.32869	SNX6//APP//AP2A1//AP2M1//SH3KBP1
GO:0045744	negative regulation of G-protein coupled receptor protein signaling pathway	Biological process	5	64	454	14742	2.53683	0.0469149	0.357695	1.32869	GRM5//ARRB2//RGS2//RGS10//CCL5
GO:0071902	positive regulation of protein serine/threonine kinase activity	Biological process	11	201	454	14742	1.77704	0.0470282	0.357918	1.32764	IRAK1//MAP3K9//MAP3K11//MAPK10//TRAF6//MAP3K5//SPAG9//FGD4//PKD1//SIRT1//ALS2
GO:0061138	morphogenesis of a branching epithelium	Biological process	9	153	454	14742	1.91008	0.04722	0.358215	1.32587	ACVR1//PPP3R1//SFRP2//HOXA11//SIX1//HOXA5//DDR1//SEMA3A//NTN4
GO:0030001	metal ion transport	Biological process	26	596	454	14742	1.41654	0.0472353	0.358215	1.32573	P2RX4//KCNJ3//SLC24A2//KCTD3//KCTD5//SCN2A//SCN8A//SCN9A//SLC10A3//SLC5A11//CACNB2//PKD1//CCL5//TRPV6//CACHD1//SLC11A1//FKBP1B//TUSC3//SLC40A1//STK39//LYN//GNAO1//GNAI2//ADRB1//ATP2A2//HPN
GO:0006816	calcium ion transport	Biological process	12	226	454	14742	1.72414	0.0474533	0.358592	1.32373	P2RX4//FKBP1B//LYN//CACNB2//GNAO1//GNAI2//CCL5//ADRB1//ATP2A2//TRPV6//PKD1//CACHD1
GO:0043405	regulation of MAP kinase activity	Biological process	12	226	454	14742	1.72414	0.0474533	0.358592	1.32373	IRAK1//MAP3K9//MAP3K11//MAPK10//TRAF6//MAP3K5//SPAG9//FGD4//LYN//RGS2//SFRP2//TRIB2
GO:0043065	positive regulation of apoptotic process	Biological process	25	569	454	14742	1.42669	0.0476121	0.359155	1.32228	PVRL2//APP//COL4A3//STK17B//FGD1//MAP3K5//SOS2//TRAF6//FASTK//MCF2L//FGD4//PPP3R1//CUL2//MAPK9//SIRT1//MAP3K11//ARRB2//CCL5//DDX5//LYN//APBB1//RHOB//HOXA5//NEUROD1//SFRP2
GO:0051050	positive regulation of transport	Biological process	19	408	454	14742	1.51215	0.0487204	0.364103	1.31229	ADRB1//P2RX4//SIRT1//DPYSL2//ERBB3//IRS1//SYNGR3//SFRP2//BAMBI//STK39//CADPS//GSK3B//SERPINE1//ADAM9//IL1A//AHSG//PTX3//SLC11A1//CCL5
GO:0060548	negative regulation of cell death	Biological process	26	598	454	14742	1.4118	0.0488171	0.364103	1.31143	BNIP2//GCLC//IKBKB//IL1A//IRAK1//PAFAH2//TRAF6//BECN1//AVEN//BIRC6//SFRP2//ACVR1//CAT//FGF4//GSK3B//HPN//NEUROD1//SERPINE1//SNAI1//SIRT1//OSR1//ERBB3//RASA1//SIX1//TOX3//CCL5
GO:0001975	response to amphetamine	Biological process	3	27	454	14742	3.60793	0.0491223	0.364103	1.30872	ADRA1B//TRDMT1//DPYSL2
GO:0009251	glucan catabolic process	Biological process	3	27	454	14742	3.60793	0.0491223	0.364103	1.30872	ADRB1//PGM1//ADRA1B
GO:0014003	oligodendrocyte development	Biological process	3	27	454	14742	3.60793	0.0491223	0.364103	1.30872	C11ORF9//HES5//LYN
GO:0016441	posttranscriptional gene silencing	Biological process	3	27	454	14742	3.60793	0.0491223	0.364103	1.30872	SNIP1//EIF2C2//TNRC6A
GO:0035194	posttranscriptional gene silencing by RNA	Biological process	3	27	454	14742	3.60793	0.0491223	0.364103	1.30872	SNIP1//EIF2C2//TNRC6A
GO:0043388	positive regulation of DNA binding	Biological process	3	27	454	14742	3.60793	0.0491223	0.364103	1.30872	UHRF1//NEUROD1//TRAF6
GO:0044247	cellular polysaccharide catabolic process	Biological process	3	27	454	14742	3.60793	0.0491223	0.364103	1.30872	ADRB1//PGM1//ADRA1B
GO:0060428	lung epithelium development	Biological process	3	27	454	14742	3.60793	0.0491223	0.364103	1.30872	HOXA5//PPP3R1//PKD1
GO:0045732	positive regulation of protein catabolic process	Biological process	5	65	454	14742	2.4978	0.049596	0.366976	1.30455	GCLC//TRIB2//PRICKLE1//ADAM9//GSK3B

## Sheet: up-CC
#Column "GO.ID" stands for the ID of gene ontology term
#Column "Term" stands for the name of gene ontology term
#Column "Ontology" stands for the ontology of GOID belongs to
#Column "Count" stands for the number of DE genes associated with the listed GOID
#Column "Pop.Hits" stands for the number of background population genes associated with the listed GOID
#Column "List.Total" stands for the total number of DE genes
#Column "Pop.Total" stands for the total number of background population genes
#Column "Fold.Enrichment" stands for the Fold Enrichment value of the GOID, it equals (Count/Pop.Hits)/(List.Total/Pop.Total)
#Column "Pvalue" stands for the significance testing value of the GOID
#Column "FDR" stands for the false discovery rate of the GOID, using Benjamini & Hochberg (1995) method
#Column "Enrichment.Score" stands for the Enrichment Score value of the GOID, it equals (-log10(Pvalue))
#Column "GENES" stands for the DE genes associated with the GOID
GO.ID	Term	Ontology	Count	Pop.Hits	List.Total	Pop.Total	Fold.Enrichment	Pvalue	FDR	Enrichment.Score	GENES
GO:0044424	intracellular part	Cellular component	384	11860	490	16875	1.11505	2.73973e-05	0.0108403	4.56229	HDAC9//CHST1//LARGE//B4GALT6//GOSR1//ENTPD4//HS3ST2//SEC23A//LMAN2//B3GNT1//MGAT4B//RAB21//ST6GALNAC4//GPR89B//SLC35A5//POMGNT1//MARCH4//ARHGAP21//TNKS2//B3GALNT2//SGMS2//SMARCA5//GNAI2//GNAO1//GNG10//GNB5//CENPQ//MYCN//ESCO1//SMARCA2//ARID1A//NCOA1//SIRT1//UHRF1//UBE2I//BIRC6//MARK4//EIF2C2//TNRC6A//SPAG9//PNN//MICAL1//MYH11//DAAM1//AMOT//EED//DDX5//MKRN3//SYNCRIP//CPSF6//CAT//CTSA//SLC11A1//TRI…
GO:0005622	intracellular	Cellular component	391	12155	490	16875	1.10782	3.89238e-05	0.0108403	4.40979	HDAC9//CHST1//LARGE//B4GALT6//GOSR1//ENTPD4//HS3ST2//SEC23A//LMAN2//B3GNT1//MGAT4B//RAB21//ST6GALNAC4//GPR89B//SLC35A5//POMGNT1//MARCH4//ARHGAP21//TNKS2//B3GALNT2//SGMS2//SMARCA5//GNAI2//GNAO1//GNG10//GNB5//CENPQ//MYCN//ESCO1//SMARCA2//ARID1A//NCOA1//SIRT1//UHRF1//UBE2I//BIRC6//MARK4//EIF2C2//TNRC6A//SPAG9//PNN//MICAL1//MYH11//DAAM1//AMOT//EED//DDX5//MKRN3//SYNCRIP//CPSF6//CAT//CTSA//SLC11A1//TRI…
GO:0000267	cell fraction	Cellular component	56	1177	490	16875	1.63855	0.000176103	0.0238683	3.75423	ADRA1B//SLC2A4//SYT6//ADRB1//RHOB//ATP2A2//CDK7//ECE1//GNAI2//GRM5//IRAK1//JAG2//L1CAM//LYN//PAM//SCN2A//SCN8A//VLDLR//MAP3K12//MTMR3//KDELR1//SLC24A2//STK39//AVEN//BIRC6//ANKRA2//ACTC1//DPYSL2//FGB//FGF4//MAP3K11//PEBP1//SERPINE1//PFKP//SAT1//CCL5//PPP1R11//ARID1A//NSMAF//SH2D2A//IPO7//ST6GALNAC4//RASD1//NAGK//HMOX2//IRS1//VAMP3//SYNCRIP//POMGNT1//ALS2//TNKS2//APP//GNAO1//SH3KBP1//SEPT3//MAP2
GO:0030425	dendrite	Cellular component	21	301	490	16875	2.40271	0.000201218	0.0238683	3.69633	GRM3//GRM5//LYN//P2RX4//CRIPT//MINK1//LRFN1//APP//MAP2//DPYSL2//EPHB2//RELN//SCN8A//UBE2I//TAOK2//SEMA3A//SACS//SLC7A10//DPYSL5//ALS2//TRIM9
GO:0043005	neuron projection	Cellular component	31	537	490	16875	1.98809	0.000231085	0.0238683	3.63623	NEFM//NEFL//GRM3//GRM5//LYN//P2RX4//CRIPT//MINK1//LRFN1//APP//DPYSL2//EPHB2//SCN2A//SEMA3A//SACS//ALS2//DOCK7//RELN//SCN8A//UBE2I//TAOK2//SLC7A10//DPYSL5//TRIM9//APBB1//TSHZ3//L1CAM//MAP2//PEBP1//PTPN13//MARK4
GO:0045202	synapse	Cellular component	27	444	490	16875	2.09425	0.000257109	0.0238683	3.58988	PEBP1//SYPL1//SYNGR3//SLC40A1//TRIM9//GRM3//GRM5//LYN//P2RX4//CRIPT//MINK1//LRFN1//ZNRF1//SYT6//APP//L1CAM//SEPT3//DPYSL2//ERBB3//GABRB1//LRFN2//APBB1//UBE2I//CADPS//LGI1//VAMP3//SH3KBP1
GO:0005794	Golgi apparatus	Cellular component	52	1116	490	16875	1.60467	0.000495039	0.0345557	3.30536	CHST1//LARGE//B4GALT6//GOSR1//ENTPD4//HS3ST2//SEC23A//LMAN2//B3GNT1//MGAT4B//RAB21//ST6GALNAC4//GPR89B//SLC35A5//POMGNT1//MARCH4//ARHGAP21//TNKS2//B3GALNT2//SGMS2//KDELR1//BECN1//CHST2//BIRC6//AP2A1//SLC2A4//GPR89A//NAGPA//SCAMP2//APP//CAT//AP3S1//EPB41//FGD1//LYN//PEBP1//PTGFRN//FZD8//TRIP11//TRIP10//LAPTM4A//UBAC1//IPO7//WWC1//GRHL1//MINK1//TRPM4//FGD6//STK33//PRRG4//FGD4//FGD5
GO:0043229	intracellular organelle	Cellular component	332	10221	490	16875	1.11865	0.000496311	0.0345557	3.30425	HDAC9//CHST1//LARGE//B4GALT6//GOSR1//ENTPD4//HS3ST2//SEC23A//LMAN2//B3GNT1//MGAT4B//RAB21//ST6GALNAC4//GPR89B//SLC35A5//POMGNT1//MARCH4//ARHGAP21//TNKS2//B3GALNT2//SGMS2//SMARCA5//CENPQ//MYCN//ESCO1//SMARCA2//ARID1A//NCOA1//SIRT1//UHRF1//UBE2I//BIRC6//MARK4//EIF2C2//TNRC6A//SPAG9//PNN//MICAL1//MYH11//DAAM1//AMOT//EED//CAT//CTSA//SLC11A1//TRIP10//ZNRF1//CDK7//AP2M1//DPYSL2//GLDC//NDUFA8//PEBP1//MA…
GO:0043226	organelle	Cellular component	332	10236	490	16875	1.11701	0.000572475	0.0354298	3.24224	HDAC9//CHST1//LARGE//B4GALT6//GOSR1//ENTPD4//HS3ST2//SEC23A//LMAN2//B3GNT1//MGAT4B//RAB21//ST6GALNAC4//GPR89B//SLC35A5//POMGNT1//MARCH4//ARHGAP21//TNKS2//B3GALNT2//SGMS2//SMARCA5//CENPQ//MYCN//ESCO1//SMARCA2//ARID1A//NCOA1//SIRT1//UHRF1//UBE2I//BIRC6//MARK4//EIF2C2//TNRC6A//SPAG9//PNN//MICAL1//MYH11//DAAM1//AMOT//EED//CAT//CTSA//SLC11A1//TRIP10//ZNRF1//CDK7//AP2M1//DPYSL2//GLDC//NDUFA8//PEBP1//MA…
GO:0043231	intracellular membrane-bounded organelle	Cellular component	302	9191	490	16875	1.1316	0.000677749	0.0376256	3.16893	HDAC9//CHST1//LARGE//B4GALT6//GOSR1//ENTPD4//HS3ST2//SEC23A//LMAN2//B3GNT1//MGAT4B//RAB21//ST6GALNAC4//GPR89B//SLC35A5//POMGNT1//MARCH4//ARHGAP21//TNKS2//B3GALNT2//SGMS2//SMARCA2//ARID1A//NCOA1//SIRT1//UBE2I//SPAG9//EED//CAT//CTSA//SLC11A1//TRIP10//ZNRF1//CDK7//AP2M1//DPYSL2//GLDC//NDUFA8//PEBP1//MAPK9//MAPK10//RGS2//TST//TUSC3//SLC25A12//WARS2//FASTK//RAB32//TDRKH//PDSS1//SACS//TIMM10//COQ2//HEB…
GO:0043227	membrane-bounded organelle	Cellular component	302	9201	490	16875	1.13037	0.000743055	0.0376256	3.12898	HDAC9//CHST1//LARGE//B4GALT6//GOSR1//ENTPD4//HS3ST2//SEC23A//LMAN2//B3GNT1//MGAT4B//RAB21//ST6GALNAC4//GPR89B//SLC35A5//POMGNT1//MARCH4//ARHGAP21//TNKS2//B3GALNT2//SGMS2//SMARCA2//ARID1A//NCOA1//SIRT1//UBE2I//SPAG9//EED//CAT//CTSA//SLC11A1//TRIP10//ZNRF1//CDK7//AP2M1//DPYSL2//GLDC//NDUFA8//PEBP1//MAPK9//MAPK10//RGS2//TST//TUSC3//SLC25A12//WARS2//FASTK//RAB32//TDRKH//PDSS1//SACS//TIMM10//COQ2//HEB…
GO:0005856	cytoskeleton	Cellular component	72	1714	490	16875	1.44667	0.000842567	0.0391091	3.0744	TNKS2//BIRC6//MARK4//PNN//MICAL1//MYH11//DAAM1//AMOT//GNAI2//GSK3B//MAP3K11//KIF23//ZFYVE26//PXK//ALS2//MASTL//TTC8//PLEKHA7//PAN3//CC2D1A//FSD1//FAM110B//KLC4//DNM1//MAP2//NEFM//NEFL//ACTC1//EPB41//GRM3//GRM5//LYN//P2RX4//CRIPT//MINK1//LRFN1//PGM1//ZNF174//CASK//STK17B//INTS6//PHC3//FGD4//STRBP//SEPT3//APP//PPID//SMARCA2//NUP35//ANK3//CDK7//CNN1//EPB41L1//FGD1//PTPN4//PTPN13//TGFB1I1//TRIP11//TR…
GO:0044433	cytoplasmic vesicle part	Cellular component	22	362	490	16875	2.09296	0.000943545	0.0404273	3.02524	AP2A1//SEC23A//AP3S1//SLC2A4//SYPL1//CADPS//TAOK2//RAB21//ZDHHC8//SH3KBP1//ARHGAP21//SNX6//SNX21//GPR89A//VAMP3//AP2M1//SLC11A1//ZNRF1//SYT6//APP//FGB//SERPINE1
GO:0030027	lamellipodium	Cellular component	10	109	490	16875	3.15952	0.00127151	0.0497217	2.89568	FAP//APBB1//FGD1//PTPN13//DGKZ//FGD6//ALS2//FGD4//FGD5//AMOT
GO:0030054	cell junction	Cellular component	34	678	490	16875	1.72702	0.00143891	0.0497217	2.84197	HPN//PNN//PTPRK//PVRL2//CASK//RND1//PLEKHA7//CALB2//GJA5//GJB1//CLDN11//AMOT//FGFR3//TGFB1I1//SH3KBP1//SCN2A//DSG4//FAP//GABRB1//P2RX4//CADPS//SYNGR3//LGI1//VAMP3//CRIPT//IQSEC1//MINK1//SEPT3//LRFN2//ARHGAP21//LRFN1//ZNRF1//TRIM9//SYT6
GO:0012505	endomembrane system	Cellular component	68	1635	490	16875	1.43232	0.00153364	0.0497217	2.81428	CHST1//LARGE//B4GALT6//GOSR1//ENTPD4//HS3ST2//SEC23A//LMAN2//B3GNT1//MGAT4B//RAB21//ST6GALNAC4//GPR89B//SLC35A5//POMGNT1//MARCH4//ARHGAP21//TNKS2//B3GALNT2//SGMS2//BNIP2//PTGER3//SIRT1//NUP35//RANBP2//NUP153//IPO7//ATP2A2//CDS1//GJB1//HMOX2//HPN//PTGFRN//TUSC3//EIF2AK3//KDELR1//DERL2//PPM1L//MIA3//AP2A1//APP//ARRB2//SLC2A4//VLDLR//AP2M1//AP3S1//SYPL1//CADPS//TAOK2//ZDHHC8//SH3KBP1//SNX6//SNX21//G…
GO:0030424	axon	Cellular component	16	237	490	16875	2.32498	0.00157633	0.0497217	2.80235	NEFM//NEFL//SCN2A//SCN8A//DPYSL2//L1CAM//P2RX4//PEBP1//APP//EPHB2//GRM3//SEMA3A//SACS//MINK1//ALS2//DOCK7
GO:0030659	cytoplasmic vesicle membrane	Cellular component	19	306	490	16875	2.13836	0.0016068	0.0497217	2.79404	AP2A1//SEC23A//GPR89A//VAMP3//AP2M1//SLC11A1//ZNRF1//SYT6//AP3S1//SLC2A4//SYPL1//CADPS//TAOK2//RAB21//ZDHHC8//SH3KBP1//ARHGAP21//SNX6//SNX21
GO:0044464	cell part	Cellular component	439	14351	490	16875	1.05349	0.00178144	0.0501818	2.74923	ADRA1B//ADRB1//AP2A1//APBB1//APP//RHOB//ARRB2//DDR1//CAT//AP2M1//CCBP2//COL13A1//ECE1//EPB41//EPB41L1//EPHB2//ERBB3//FAP//FGB//FGD1//FGFR3//GABRB1//GALR1//GJA5//GJB1//GNAI2//GNAO1//GNG10//GPR6//GRM3//GRM5//GSK3B//HMOX2//HPN//IFNAR2//IRAK1//IRS1//ITGB8//JAG2//KCNJ3//L1CAM//BCAM//LYN//OMG//CLDN11//P2RX4//SERPINE1//PIK3CD//PKD1//PNN//MAPK10//PTGER3//PTPN4//PTPN13//PTPRK//PVRL2//RASA1//RGS2//RGS10//R…
GO:0005623	cell	Cellular component	439	14352	490	16875	1.05342	0.00180186	0.0501818	2.74428	ADRA1B//ADRB1//AP2A1//APBB1//APP//RHOB//ARRB2//DDR1//CAT//AP2M1//CCBP2//COL13A1//ECE1//EPB41//EPB41L1//EPHB2//ERBB3//FAP//FGB//FGD1//FGFR3//GABRB1//GALR1//GJA5//GJB1//GNAI2//GNAO1//GNG10//GPR6//GRM3//GRM5//GSK3B//HMOX2//HPN//IFNAR2//IRAK1//IRS1//ITGB8//JAG2//KCNJ3//L1CAM//BCAM//LYN//OMG//CLDN11//P2RX4//SERPINE1//PIK3CD//PKD1//PNN//MAPK10//PTGER3//PTPN4//PTPN13//PTPRK//PVRL2//RASA1//RGS2//RGS10//R…
GO:0044456	synapse part	Cellular component	20	338	490	16875	2.0378	0.00216525	0.0551846	2.66449	PEBP1//SYPL1//SYNGR3//SLC40A1//TRIM9//GRM3//GRM5//LYN//P2RX4//CRIPT//MINK1//LRFN1//ZNRF1//SYT6//L1CAM//SEPT3//DPYSL2//ERBB3//GABRB1//LRFN2
GO:0009898	internal side of plasma membrane	Cellular component	9	98	490	16875	3.16274	0.00217964	0.0551846	2.66161	GNAI2//GNAO1//GNG10//GNB5//RASA1//IKBKB//PTPN4//RGS2//TRAF6
GO:0005624	membrane fraction	Cellular component	40	860	490	16875	1.6018	0.00227921	0.0551964	2.64222	ADRA1B//SLC2A4//SYT6//ADRB1//ATP2A2//HMOX2//IRS1//VAMP3//SYNCRIP//POMGNT1//ALS2//TNKS2//APP//DPYSL2//GNAO1//PEBP1//SH3KBP1//SEPT3//MAP2//RHOB//CDK7//ECE1//GNAI2//GRM5//IRAK1//JAG2//L1CAM//LYN//PAM//SCN2A//SCN8A//VLDLR//MAP3K12//MTMR3//KDELR1//SLC24A2//STK39//AVEN//BIRC6//ANKRA2
GO:0012506	vesicle membrane	Cellular component	19	318	490	16875	2.05766	0.00248172	0.0557781	2.60525	AP2A1//SEC23A//AP3S1//SLC2A4//SYPL1//CADPS//TAOK2//RAB21//ZDHHC8//SH3KBP1//ARHGAP21//SNX6//SNX21//GPR89A//VAMP3//AP2M1//SLC11A1//ZNRF1//SYT6
GO:0005634	nucleus	Cellular component	198	5793	490	16875	1.17709	0.00256402	0.0557781	2.59108	HDAC9//TNKS2//SMARCA2//ARID1A//NCOA1//SIRT1//UBE2I//EED//BNIP2//PTGER3//NUP35//RANBP2//NUP153//IPO7//CASK//CCNT2//CDK7//CDK9//CSTF2//E2F5//HNF4G//INSM1//KPNA2//NEUROD1//MAPK9//MAPK10//PTPN2//STAT3//WEE1//SMARCA5//HAND1//KIF23//NCOR2//SRRM1//SYNCRIP//DNAJC8//RPS6KA6//GRHL1//REV1//CENPQ//YTHDC1//HOXA11//NHLH2//SIX1//FOXQ1//NPAS4//CHAF1A//CRNKL1//TNKS1BP1//DDX5//RGS2//TSG101//TAOK2//IQSEC1//DDX52//C…
GO:0031410	cytoplasmic vesicle	Cellular component	39	839	490	16875	1.60085	0.00260365	0.0557781	2.58442	SPAG9//AP3S1//PAM//SYPL1//AMOT//AP2A1//PEBP1//SYNGR3//SLC40A1//TRIM9//SEC23A//ARRB2//FGFR3//SCN8A//SOCS1//BECN1//TAOK2//SLC2A4//VAMP3//CADPS//RAB21//ZDHHC8//SH3KBP1//ARHGAP21//SNX6//SNX21//GPR89A//AP2M1//SLC11A1//ZNRF1//SYT6//FGB//APP//SERPINE1//ECE1//MYH11//RAB38//ENTPD4//ERMAP
GO:0070603	SWI/SNF-type complex	Cellular component	4	21	490	16875	6.55977	0.00283726	0.0572003	2.5471	SMARCA2//SMARCD2//ARID1A//CHAF1A
GO:0016023	cytoplasmic membrane-bounded vesicle	Cellular component	37	789	490	16875	1.615	0.00287542	0.0572003	2.5413	SPAG9//AP3S1//PAM//SYPL1//AMOT//AP2A1//PEBP1//SYNGR3//SLC40A1//TRIM9//SEC23A//SLC2A4//VAMP3//CADPS//TAOK2//RAB21//ZDHHC8//SH3KBP1//ARHGAP21//SNX6//SNX21//GPR89A//AP2M1//SLC11A1//ZNRF1//SYT6//FGB//APP//SERPINE1//ECE1//MYH11//RAB38//ARRB2//FGFR3//SCN8A//SOCS1//BECN1
GO:0016604	nuclear body	Cellular component	16	253	490	16875	2.17795	0.00304297	0.0580912	2.5167	CDK9//UBE2I//SIRT1//CHFR//TRIM8//APBB1//PNN//SRRM1//CRNKL1//WBP11//YLPM1//CCNL1//CPSF6//CSTF2//NCOR2//YTHDC1
GO:0031228	intrinsic to Golgi membrane	Cellular component	6	50	490	16875	4.13265	0.00312879	0.0580912	2.50462	LARGE//ENTPD4//B3GNT1//ST6GALNAC4//SGMS2//CHST2
GO:0005905	coated pit	Cellular component	6	52	490	16875	3.9737	0.00381831	0.0686064	2.41813	AP2A1//AP2M1//APP//ARRB2//SLC2A4//VLDLR
GO:0005626	insoluble fraction	Cellular component	40	891	490	16875	1.54607	0.00420897	0.0716333	2.37582	ADRA1B//SLC2A4//SYT6//ADRB1//RHOB//ATP2A2//CDK7//ECE1//GNAI2//GRM5//IRAK1//JAG2//L1CAM//LYN//PAM//SCN2A//SCN8A//VLDLR//MAP3K12//MTMR3//KDELR1//SLC24A2//STK39//AVEN//BIRC6//ANKRA2//HMOX2//IRS1//VAMP3//SYNCRIP//POMGNT1//ALS2//TNKS2//APP//DPYSL2//GNAO1//PEBP1//SH3KBP1//SEPT3//MAP2
GO:0031988	membrane-bounded vesicle	Cellular component	37	808	490	16875	1.57702	0.00424398	0.0716333	2.37223	SPAG9//AP3S1//PAM//SYPL1//AMOT//AP2A1//PEBP1//SYNGR3//SLC40A1//TRIM9//SLC2A4//SEC23A//ARRB2//FGFR3//SCN8A//SOCS1//BECN1//TAOK2//VAMP3//CADPS//RAB21//ZDHHC8//SH3KBP1//ARHGAP21//SNX6//SNX21//GPR89A//AP2M1//SLC11A1//ZNRF1//SYT6//FGB//APP//SERPINE1//ECE1//MYH11//RAB38
GO:0044428	nuclear part	Cellular component	90	2376	490	16875	1.3045	0.00438411	0.0718221	2.35812	HDAC9//TNKS2//SMARCA2//ARID1A//NCOA1//SIRT1//UBE2I//EED//BNIP2//PTGER3//NUP35//RANBP2//NUP153//IPO7//CASK//CCNT2//CDK7//CDK9//CSTF2//E2F5//HNF4G//INSM1//KPNA2//NEUROD1//MAPK9//MAPK10//PTPN2//STAT3//WEE1//SMARCA5//HAND1//KIF23//NCOR2//SRRM1//SYNCRIP//DNAJC8//RPS6KA6//GRHL1//REV1//CENPQ//YTHDC1//HOXA11//NHLH2//SIX1//FOXQ1//NPAS4//CHAF1A//CRNKL1//TNKS1BP1//DDX5//RGS2//TSG101//TAOK2//IQSEC1//DDX52//C…
GO:0031982	vesicle	Cellular component	39	876	490	16875	1.53323	0.00537373	0.0855191	2.26972	SPAG9//AP3S1//PAM//SYPL1//AMOT//AP2A1//PEBP1//SYNGR3//SLC40A1//TRIM9//SLC2A4//SEC23A//ARRB2//FGFR3//SCN8A//SOCS1//BECN1//TAOK2//VAMP3//CADPS//RAB21//ZDHHC8//SH3KBP1//ARHGAP21//SNX6//SNX21//GPR89A//AP2M1//SLC11A1//ZNRF1//SYT6//FGB//APP//SERPINE1//ENTPD4//ERMAP//ECE1//MYH11//RAB38
GO:0005625	soluble fraction	Cellular component	20	369	490	16875	1.8666	0.0057819	0.0870824	2.23793	ACTC1//RHOB//DPYSL2//FGB//FGF4//MAP3K11//PEBP1//SERPINE1//PFKP//SAT1//CCL5//SLC2A4//PPP1R11//ARID1A//NSMAF//SH2D2A//IPO7//ST6GALNAC4//RASD1//NAGK
GO:0044446	intracellular organelle part	Cellular component	199	5923	490	16875	1.15707	0.00578465	0.0870824	2.23772	HDAC9//CHST1//LARGE//B4GALT6//GOSR1//ENTPD4//HS3ST2//SEC23A//LMAN2//B3GNT1//MGAT4B//RAB21//ST6GALNAC4//GPR89B//SLC35A5//POMGNT1//MARCH4//ARHGAP21//TNKS2//B3GALNT2//SGMS2//CENPQ//MYCN//ESCO1//SMARCA2//ARID1A//NCOA1//SIRT1//UHRF1//UBE2I//BIRC6//MARK4//PNN//MICAL1//MYH11//DAAM1//AMOT//EED//CAT//PEX3//BNIP2//PTGER3//NUP35//RANBP2//NUP153//IPO7//CASK//CCNT2//CDK7//CDK9//CSTF2//E2F5//HNF4G//INSM1//KPNA…
GO:0016585	chromatin remodeling complex	Cellular component	9	114	490	16875	2.71885	0.00598863	0.0877807	2.22267	HDAC9//SMARCA5//SIRT1//SMARCA2//SMARCD2//ARID1A//MORF4L1//CHAF1A//RBM10
GO:0000139	Golgi membrane	Cellular component	25	505	490	16875	1.70489	0.00689665	0.0971357	2.16136	AP2A1//LARGE//ENTPD4//B3GNT1//ST6GALNAC4//SGMS2//GPR89A//CHST2//B4GALT6//NAGPA//SCAMP2//CHST1//GOSR1//HS3ST2//SEC23A//LMAN2//MGAT4B//RAB21//GPR89B//SLC35A5//POMGNT1//MARCH4//ARHGAP21//TNKS2//B3GALNT2
GO:0001518	voltage-gated sodium channel complex	Cellular component	3	14	490	16875	7.37974	0.00697563	0.0971357	2.15642	SCN2A//SCN8A//SCN9A
GO:0044459	plasma membrane part	Cellular component	77	2024	490	16875	1.31017	0.00767	0.103333	2.1152	GNAI2//GNAO1//GNG10//GNB5//SCN2A//SCN8A//SCN9A//TRIP10//ACVR1//ADRA1B//ADRB1//APP//ATP2A2//DDR1//CACNB2//CCBP2//EPHB2//ERBB3//FGFR3//GABRB1//GPR6//GRM3//GRM5//HPN//IFNAR2//JAG2//BCAM//M6PR//P2RX4//PKD1//PTGER3//PTPRK//SLC2A4//SLC11A1//SORL1//SYPL1//TUSC3//TRPA1//SYNGR3//SLC40A1//TRPV6//SLC7A10//SGMS2//ITGB8//IRS1//AP2A1//PVRL2//PLEKHA7//GJA5//GJB1//CLDN11//AMOT//TGFB1I1//SH3KBP1//KCNJ3//KCTD3//KC…
GO:0005737	cytoplasm	Cellular component	281	8759	490	16875	1.10484	0.00807948	0.103333	2.09262	CHST1//LARGE//B4GALT6//GOSR1//ENTPD4//HS3ST2//SEC23A//LMAN2//B3GNT1//MGAT4B//RAB21//ST6GALNAC4//GPR89B//SLC35A5//POMGNT1//MARCH4//ARHGAP21//TNKS2//B3GALNT2//SGMS2//MARK4//EIF2C2//TNRC6A//SPAG9//CAT//CTSA//SLC11A1//TRIP10//ZNRF1//CDK7//AP2M1//DPYSL2//GLDC//NDUFA8//PEBP1//MAPK9//MAPK10//RGS2//TST//TUSC3//SLC25A12//WARS2//FASTK//RAB32//TDRKH//SIRT1//PDSS1//SACS//TIMM10//COQ2//HEBP1//C6ORF203//DDIT4/…
GO:0044422	organelle part	Cellular component	200	6001	490	16875	1.14777	0.00820982	0.103333	2.08567	HDAC9//CHST1//LARGE//B4GALT6//GOSR1//ENTPD4//HS3ST2//SEC23A//LMAN2//B3GNT1//MGAT4B//RAB21//ST6GALNAC4//GPR89B//SLC35A5//POMGNT1//MARCH4//ARHGAP21//TNKS2//B3GALNT2//SGMS2//CENPQ//MYCN//ESCO1//SMARCA2//ARID1A//NCOA1//SIRT1//UHRF1//UBE2I//BIRC6//MARK4//PNN//MICAL1//MYH11//DAAM1//AMOT//EED//CAT//PEX3//BNIP2//PTGER3//NUP35//RANBP2//NUP153//IPO7//CASK//CCNT2//CDK7//CDK9//CSTF2//E2F5//HNF4G//INSM1//KPNA…
GO:0043198	dendritic shaft	Cellular component	4	28	490	16875	4.91983	0.00827161	0.103333	2.08241	APP//GRM5//MAP2//CRIPT
GO:0042995	cell projection	Cellular component	45	1073	490	16875	1.44431	0.00835182	0.103333	2.07822	FGD1//RASA1//FGD6//ALS2//FGD4//FGD5//AMOT//NEFM//NEFL//PKD1//TTC8//GRM3//GRM5//LYN//P2RX4//CRIPT//MINK1//LRFN1//APBB1//FAP//PTPN13//DGKZ//APP//DPYSL2//EPHB2//SCN2A//SEMA3A//SACS//DOCK7//RELN//SCN8A//UBE2I//TAOK2//SLC7A10//DPYSL5//TRIM9//TSHZ3//DOCK4//WWC1//MARK4//L1CAM//MAP2//PEBP1//FZD8//TRIP10
GO:0016514	SWI/SNF complex	Cellular component	3	15	490	16875	6.88776	0.00853382	0.103333	2.06886	SMARCA2//SMARCD2//ARID1A
GO:0019717	synaptosome	Cellular component	8	101	490	16875	2.72782	0.00914749	0.108407	2.0387	APP//DPYSL2//GNAO1//PEBP1//VAMP3//SH3KBP1//SEPT3//ALS2
GO:0016020	membrane	Cellular component	249	7703	490	16875	1.11324	0.0112616	0.129333	1.9484	ADRA1B//ADRB1//AP2A1//APBB1//APP//RHOB//ARRB2//DDR1//CAT//AP2M1//CCBP2//COL13A1//ECE1//EPB41//EPB41L1//EPHB2//ERBB3//FAP//FGB//FGD1//FGFR3//GABRB1//GALR1//GJA5//GJB1//GNAI2//GNAO1//GNG10//GPR6//GRM3//GRM5//GSK3B//HMOX2//HPN//IFNAR2//IRAK1//IRS1//ITGB8//JAG2//KCNJ3//L1CAM//BCAM//LYN//OMG//CLDN11//P2RX4//SERPINE1//PIK3CD//PKD1//PNN//MAPK10//PTGER3//PTPN4//PTPN13//PTPRK//PVRL2//RASA1//RGS2//RGS10//R…
GO:0030173	integral to Golgi membrane	Cellular component	5	47	490	16875	3.6637	0.0113776	0.129333	1.94395	LARGE//ENTPD4//B3GNT1//ST6GALNAC4//SGMS2
GO:0034706	sodium channel complex	Cellular component	3	17	490	16875	6.07743	0.0122176	0.136104	1.91302	SCN2A//SCN8A//SCN9A
GO:0033267	axon part	Cellular component	8	107	490	16875	2.57486	0.0127095	0.138808	1.89587	NEFM//NEFL//SCN2A//SCN8A//DPYSL2//L1CAM//P2RX4//PEBP1
GO:0043235	receptor complex	Cellular component	10	154	490	16875	2.23628	0.014542	0.155767	1.83738	ITGB8//IRS1//IL28RA//LYN//IKBKB//TRAF6//IRAK1//ACVR1//ERBB3//CAPRIN2
GO:0001726	ruffle	Cellular component	8	112	490	16875	2.45991	0.0163791	0.170313	1.78571	WWC1//FGD1//RASA1//FGD6//ALS2//FGD4//FGD5//AMOT
GO:0044431	Golgi apparatus part	Cellular component	29	656	490	16875	1.52245	0.0166018	0.170313	1.77984	CHST1//LARGE//B4GALT6//GOSR1//ENTPD4//HS3ST2//SEC23A//LMAN2//B3GNT1//MGAT4B//RAB21//ST6GALNAC4//GPR89B//SLC35A5//POMGNT1//MARCH4//ARHGAP21//TNKS2//B3GALNT2//SGMS2//KDELR1//BECN1//CHST2//BIRC6//AP2A1//SLC2A4//GPR89A//NAGPA//SCAMP2
GO:0030136	clathrin-coated vesicle	Cellular component	11	181	490	16875	2.09296	0.0168172	0.170313	1.77425	AP2A1//PEBP1//SYPL1//SYNGR3//SLC40A1//TRIM9//SLC2A4//VAMP3//ZNRF1//SYT6//ECE1
GO:0031226	intrinsic to plasma membrane	Cellular component	50	1271	490	16875	1.35479	0.0173232	0.172304	1.76137	SCN2A//SCN8A//SCN9A//ACVR1//ADRA1B//ADRB1//APP//ATP2A2//DDR1//CACNB2//CCBP2//EPHB2//ERBB3//FGFR3//GABRB1//GPR6//GRM3//GRM5//HPN//IFNAR2//JAG2//BCAM//M6PR//P2RX4//PKD1//PTGER3//PTPRK//SLC2A4//SLC11A1//SORL1//SYPL1//TUSC3//TRPA1//SYNGR3//SLC40A1//TRPV6//SLC7A10//SGMS2//ITGB8//IRS1//KCNJ3//KCTD3//KCTD5//ADAM9//RASA1//IL28RA//LYN//IKBKB//TRAF6//IRAK1
GO:0031252	cell leading edge	Cellular component	13	231	490	16875	1.93811	0.0177292	0.173249	1.75131	FGD1//RASA1//FGD6//ALS2//FGD4//FGD5//AMOT//APBB1//FAP//PTPN13//DGKZ//PTPRK//WWC1
GO:0005834	heterotrimeric G-protein complex	Cellular component	4	36	490	16875	3.82653	0.0198507	0.187404	1.70222	GNAI2//GNAO1//GNG10//GNB5
GO:0032154	cleavage furrow	Cellular component	4	36	490	16875	3.82653	0.0198507	0.187404	1.70222	RHOB//RAB21//FSD1//MASTL
GO:0031902	late endosome membrane	Cellular component	6	74	490	16875	2.79233	0.0204406	0.188112	1.68951	RHOB//SLC11A1//TSG101//STARD3//SLC29A3//VPS37D
GO:0008021	synaptic vesicle	Cellular component	7	95	490	16875	2.53759	0.0206011	0.188112	1.68611	ZNRF1//SYT6//PEBP1//SYPL1//SYNGR3//SLC40A1//TRIM9
GO:0005887	integral to plasma membrane	Cellular component	48	1226	490	16875	1.34834	0.0210618	0.189217	1.6765	SCN2A//SCN8A//SCN9A//ITGB8//IRS1//KCNJ3//KCTD3//KCTD5//IL28RA//LYN//IKBKB//TRAF6//IRAK1//ACVR1//ADRA1B//ADRB1//APP//ATP2A2//DDR1//CACNB2//CCBP2//EPHB2//ERBB3//FGFR3//GABRB1//GPR6//GRM3//GRM5//HPN//IFNAR2//JAG2//BCAM//M6PR//P2RX4//PKD1//PTGER3//PTPRK//SLC2A4//SLC11A1//SORL1//SYPL1//TUSC3//TRPA1//SYNGR3//SLC40A1//TRPV6//SLC7A10//SGMS2
GO:0032153	cell division site	Cellular component	4	38	490	16875	3.62513	0.0237791	0.206952	1.6238	RHOB//RAB21//FSD1//MASTL
GO:0032155	cell division site part	Cellular component	4	38	490	16875	3.62513	0.0237791	0.206952	1.6238	RHOB//RAB21//FSD1//MASTL
GO:0031981	nuclear lumen	Cellular component	73	2009	490	16875	1.25138	0.0250172	0.214378	1.60176	HDAC9//TNKS2//SMARCA2//ARID1A//NCOA1//SIRT1//UBE2I//EED//CASK//CCNT2//CDK7//CDK9//CSTF2//E2F5//HNF4G//INSM1//KPNA2//NEUROD1//MAPK9//MAPK10//PTPN2//STAT3//WEE1//SMARCA5//HAND1//KIF23//NCOR2//NUP153//SRRM1//SYNCRIP//DNAJC8//RPS6KA6//GRHL1//REV1//CENPQ//YTHDC1//HOXA11//NHLH2//SIX1//FOXQ1//NPAS4//TNKS1BP1//DDX5//RGS2//TSG101//TAOK2//IQSEC1//DDX52//CC2D1A//SDAD1//CDCA7L//ZNF419//FHOD3//OSR1//YPEL4//CP…
GO:0014069	postsynaptic density	Cellular component	7	100	490	16875	2.41071	0.0264255	0.219687	1.57798	GRM3//GRM5//LYN//P2RX4//CRIPT//MINK1//LRFN1
GO:0044327	dendritic spine head	Cellular component	7	100	490	16875	2.41071	0.0264255	0.219687	1.57798	GRM3//GRM5//LYN//P2RX4//CRIPT//MINK1//LRFN1
GO:0005720	nuclear heterochromatin	Cellular component	3	23	490	16875	4.49201	0.0279949	0.229311	1.55292	EED//TNKS1BP1//SIRT1
GO:0071013	catalytic step 2 spliceosome	Cellular component	6	80	490	16875	2.58291	0.0287308	0.231928	1.54165	DDX5//PNN//SRRM1//SYNCRIP//CRNKL1//PPIL3
GO:0005829	cytosol	Cellular component	79	2218	490	16875	1.22663	0.0303847	0.241775	1.51734	PIK3CD//PFKP//IKBKB//VBP1//NEFL//ACTC1//AP2A1//APP//RHOB//ARRB2//BNIP2//CARS//CAT//CDK7//AP2M1//DPYSL2//EIF4G2//EPB41L1//FGD1//FKBP1B//GCLC//GNAI2//GSK3B//IL1A//IRAK1//IRS1//KPNA2//LYN//MYH11//PDE8A//PFKFB3//PGM1//PGM3//PLCB4//PPP3R1//PPP6C//MAPK9//MAPK10//RANBP2//RASA1//RGS2//SAT1//SOS2//SRP14//STAT3//TRAF6//MAP3K12//CADPS//SOCS1//SPAG9//TRIP10//KIF23//EIF5B//DOCK4//TANK//SRRM1//SEC23A//FRMPD1//…
GO:0044444	cytoplasmic part	Cellular component	206	6396	490	16875	1.10919	0.0313671	0.246077	1.50353	CHST1//LARGE//B4GALT6//GOSR1//ENTPD4//HS3ST2//SEC23A//LMAN2//B3GNT1//MGAT4B//RAB21//ST6GALNAC4//GPR89B//SLC35A5//POMGNT1//MARCH4//ARHGAP21//TNKS2//B3GALNT2//SGMS2//MARK4//EIF2C2//TNRC6A//SPAG9//CAT//CTSA//SLC11A1//TRIP10//ZNRF1//CDK7//AP2M1//DPYSL2//GLDC//NDUFA8//PEBP1//MAPK9//MAPK10//RGS2//TST//TUSC3//SLC25A12//WARS2//FASTK//RAB32//TDRKH//SIRT1//PDSS1//SACS//TIMM10//COQ2//HEBP1//C6ORF203//DDIT4/…
GO:0031090	organelle membrane	Cellular component	78	2192	490	16875	1.22547	0.0319914	0.247489	1.49497	CHST1//LARGE//B4GALT6//GOSR1//ENTPD4//HS3ST2//SEC23A//LMAN2//B3GNT1//MGAT4B//RAB21//ST6GALNAC4//GPR89B//SLC35A5//POMGNT1//MARCH4//ARHGAP21//TNKS2//B3GALNT2//SGMS2//CAT//PEX3//SIRT1//PEBP1//NDUFA8//TST//SLC25A12//TIMM10//AP2M1//M6PR//SLC29A3//HGSNAT//ATP2A2//CDS1//GJB1//HMOX2//HPN//PTGFRN//TUSC3//EIF2AK3//KDELR1//DERL2//PPM1L//MIA3//AP2A1//RHOB//IRAK1//TRAF6//TSG101//VPS37D//SLC2A4//LYN//AP3S1//SY…
GO:0035098	ESC/E(Z) complex	Cellular component	2	10	490	16875	6.88776	0.0324484	0.247586	1.48881	EED//SIRT1
GO:0030135	coated vesicle	Cellular component	12	227	490	16875	1.82055	0.0337283	0.253873	1.47201	AP2A1//PEBP1//SYPL1//SYNGR3//SLC40A1//TRIM9//SEC23A//SLC2A4//VAMP3//ZNRF1//SYT6//ECE1
GO:0005654	nucleoplasm	Cellular component	53	1421	490	16875	1.28449	0.0352054	0.261459	1.45339	HDAC9//E2F5//HOXA11//NHLH2//SIX1//FOXQ1//NPAS4//CDK7//CSTF2//CPSF6//CDK9//MORF4L1//MED12L//PPARGC1B//NCOR2//YTHDC1//UBE2I//SIRT1//CHFR//TRIM8//APBB1//PNN//SRRM1//CRNKL1//WBP11//YLPM1//CCNL1//SPEN//INTS6//EPC2//EED//CCNT2//HNF4G//INSM1//KPNA2//NEUROD1//MAPK9//MAPK10//PTPN2//SMARCA2//STAT3//WEE1//SMARCA5//NCOA1//HAND1//KIF23//NUP153//SYNCRIP//DNAJC8//RPS6KA6//GRHL1//REV1//CENPQ
GO:0005758	mitochondrial intermembrane space	Cellular component	4	44	490	16875	3.1308	0.038225	0.27346	1.41765	TIMM10//CAT//LYN//NDUFA8
GO:0035631	CD40 receptor complex	Cellular component	2	11	490	16875	6.2616	0.0389094	0.27346	1.40995	IKBKB//TRAF6
GO:0060053	neurofilament cytoskeleton	Cellular component	2	11	490	16875	6.2616	0.0389094	0.27346	1.40995	NEFM//NEFL
GO:0071564	npBAF complex	Cellular component	2	11	490	16875	6.2616	0.0389094	0.27346	1.40995	SMARCA2//ARID1A
GO:0043228	non-membrane-bounded organelle	Cellular component	102	2986	490	16875	1.17641	0.0397671	0.27346	1.40048	SMARCA5//TNKS2//CENPQ//MYCN//ESCO1//SMARCA2//ARID1A//NCOA1//SIRT1//UHRF1//UBE2I//BIRC6//MARK4//EIF2C2//TNRC6A//PNN//MICAL1//MYH11//DAAM1//AMOT//EED//NSD1//TNKS1BP1//DDX5//HOXA11//RGS2//SIX1//TSG101//CASK//TAOK2//HAND1//IQSEC1//NUP153//DDX52//CC2D1A//SDAD1//CDCA7L//ZNF419//FHOD3//OSR1//YPEL4//GNAI2//GSK3B//MAP3K11//KIF23//ZFYVE26//PXK//ALS2//MASTL//TTC8//PLEKHA7//PAN3//FSD1//FAM110B//ANK3//CDK7//C…
GO:0043232	intracellular non-membrane-bounded organelle	Cellular component	102	2986	490	16875	1.17641	0.0397671	0.27346	1.40048	SMARCA5//TNKS2//CENPQ//MYCN//ESCO1//SMARCA2//ARID1A//NCOA1//SIRT1//UHRF1//UBE2I//BIRC6//MARK4//EIF2C2//TNRC6A//PNN//MICAL1//MYH11//DAAM1//AMOT//EED//NSD1//TNKS1BP1//DDX5//HOXA11//RGS2//SIX1//TSG101//CASK//TAOK2//HAND1//IQSEC1//NUP153//DDX52//CC2D1A//SDAD1//CDCA7L//ZNF419//FHOD3//OSR1//YPEL4//GNAI2//GSK3B//MAP3K11//KIF23//ZFYVE26//PXK//ALS2//MASTL//TTC8//PLEKHA7//PAN3//FSD1//FAM110B//ANK3//CDK7//C…
GO:0005911	cell-cell junction	Cellular component	13	260	490	16875	1.72194	0.0408002	0.277142	1.38934	PVRL2//PLEKHA7//CALB2//GJA5//GJB1//CLDN11//AMOT//SCN2A//PNN//DSG4//HPN//PTPRK//CASK
GO:0043197	dendritic spine	Cellular component	8	135	490	16875	2.04082	0.043312	0.2872	1.36339	GRM3//GRM5//LYN//P2RX4//CRIPT//MINK1//LRFN1//APP
GO:0044309	neuron spine	Cellular component	8	135	490	16875	2.04082	0.043312	0.2872	1.36339	GRM3//GRM5//LYN//P2RX4//CRIPT//MINK1//LRFN1//APP
GO:0010008	endosome membrane	Cellular component	14	290	490	16875	1.66256	0.0443534	0.290645	1.35307	ECE1//ZFYVE9//RAB21//EHD4//SNX6//RHOB//SLC11A1//TSG101//STARD3//SLC29A3//VPS37D//SCAMP2//IRAK1//TRAF6
GO:0071565	nBAF complex	Cellular component	2	12	490	16875	5.7398	0.0458109	0.295411	1.33903	SMARCA2//ARID1A
GO:0043234	protein complex	Cellular component	105	3103	490	16875	1.16535	0.0461414	0.295411	1.33591	HDAC9//GNAI2//GNAO1//GNG10//GNB5//MARK4//SCN2A//SCN8A//SCN9A//PNN//MICAL1//PKD1//FGB//LAMA3//ITGB8//RANBP2//NUP153//IPO7//NUP35//E2F5//HOXA11//NHLH2//SIX1//FOXQ1//NPAS4//CDK7//SMARCA5//SIRT1//CHAF1A//TIMM10//NDUFA8//EIF2C2//CSTF2//CPSF6//MYH11//KIF23//KLC4//DNM1//MAP2//MAP3K11//FSD1//NEFM//NEFL//ACTC1//AMOT//CACNB2//IRS1//AP3S1//AP2A1//GJA5//GJB1//PIK3CD//PFKP//PPP3R1//CDK9//KCNJ3//KCTD3//KCTD5//…
GO:0016605	PML body	Cellular component	5	68	490	16875	2.53226	0.0474083	0.300073	1.32415	CDK9//UBE2I//SIRT1//CHFR//TRIM8
GO:0044451	nucleoplasm part	Cellular component	31	782	490	16875	1.36522	0.0494505	0.309482	1.30583	HDAC9//E2F5//HOXA11//NHLH2//SIX1//FOXQ1//NPAS4//CDK7//CSTF2//CPSF6//CDK9//MORF4L1//MED12L//PPARGC1B//NCOR2//YTHDC1//UBE2I//SIRT1//CHFR//TRIM8//APBB1//PNN//SRRM1//CRNKL1//WBP11//YLPM1//CCNL1//SPEN//INTS6//EPC2//EED

## Sheet: up-MF
#Column "GO.ID" stands for the ID of gene ontology term
#Column "Term" stands for the name of gene ontology term
#Column "Ontology" stands for the ontology of GOID belongs to
#Column "Count" stands for the number of DE genes associated with the listed GOID
#Column "Pop.Hits" stands for the number of background population genes associated with the listed GOID
#Column "List.Total" stands for the total number of DE genes
#Column "Pop.Total" stands for the total number of background population genes
#Column "Fold.Enrichment" stands for the Fold Enrichment value of the GOID, it equals (Count/Pop.Hits)/(List.Total/Pop.Total)
#Column "Pvalue" stands for the significance testing value of the GOID
#Column "FDR" stands for the false discovery rate of the GOID, using Benjamini & Hochberg (1995) method
#Column "Enrichment.Score" stands for the Enrichment Score value of the GOID, it equals (-log10(Pvalue))
#Column "GENES" stands for the DE genes associated with the GOID
GO.ID	Term	Ontology	Count	Pop.Hits	List.Total	Pop.Total	Fold.Enrichment	Pvalue	FDR	Enrichment.Score	GENES
GO:0005515	protein binding	Molecular function	265	6731	458	15325	1.31735	8.35475e-10	7.78663e-07	9.07807	VBP1//CHAF1A//DNAJC8//VAMP3//GSK3B//SPEN//NEUROD1//NHLH2//APBB1//ARRB2//GNAI2//RASA1//VLDLR//SFRP2//FAP//SERPINE1//SIRT1//MAP2//SMARCA5//IPO7//FGB//SACS//TIMM10//CNN1//EPB41//EPB41L1//MYH11//DAAM1//PXK//FHOD3//FGD4//APP//FKBP1B//LAMA3//P2RX4//PEBP1//FZD8//LGI1//RND1//CAPRIN2//PVRL2//ERBB3//IRS1//SH2D2A//ADAM9//HDAC9//FGF4//BAMBI//CTHRC1//JAG2//NCOR2//DLL4//IL1A//IRAK1//DOK6//SOCS1//LYN//COL4A3//L…
GO:0004702	receptor signaling protein serine/threonine kinase activity	Molecular function	9	50	458	15325	6.02293	1.48203e-05	0.00690625	4.82914	IRAK1//MAPK9//MAPK10//MAP3K9//MAP3K11//MAP3K5//MAP3K12//ACVR1//STK39
GO:0019899	enzyme binding	Molecular function	51	959	458	15325	1.77945	4.35017e-05	0.00838829	4.36149	FAP//SERPINE1//PEBP1//SIRT1//IRS1//ADAM9//HDAC9//RANBP2//NUP153//IPO7//SPAG9//DAAM1//ALS2//SNAI1//CCNT2//GSK3B//IFNAR2//MAP3K5//PKD1//PTPRK//STAT3//TRAF6//MAP3K12//SOCS1//CCNK//STK39//CCNL1//FGD1//FGD6//FGD4//FGD5//MAP3K11//TAOK2//FOXQ1//ARRB2//LYN//TSG101//CUL2//TRIB2//KPNA2//NCOR2//CAMTA2//ANKRA2//DOCK4//DOCK7//RASA1//MASTL//UBE2I//NCOA1//HAND1//TNKS1BP1
GO:0016301	kinase activity	Molecular function	45	813	458	15325	1.85207	4.93877e-05	0.00838829	4.30638	DGKZ//PFKP//PFKFB3//CASK//DDR1//CDK7//CDK9//IKBKB//IRAK1//MAP3K5//MAP3K11//CCL5//MAP3K12//EIF2AK3//FASTK//RPS6KA6//MINK1//PAN3//ACVR1//GSK3B//MAP3K9//MAPK9//MAPK10//WEE1//STK17B//TAOK2//PBK//MARK4//STK33//MASTL//STK39//RELN//EPHB2//FGF4//FGFR3//LYN//ERBB3//STAT3//SEPHS1//IRS1//ITPKB//NAGK//PIK3CD//SH3KBP1//SGMS2
GO:0016772	transferase activity, transferring phosphorus-containing groups	Molecular function	50	942	458	15325	1.77605	5.45278e-05	0.00838829	4.26338	DGKZ//PFKP//PFKFB3//REV1//POLN//CDS1//CASK//DDR1//CDK7//CDK9//IKBKB//IRAK1//MAP3K5//MAP3K11//CCL5//MAP3K12//EIF2AK3//FASTK//RPS6KA6//MINK1//PAN3//ACVR1//GSK3B//MAP3K9//MAPK9//MAPK10//WEE1//STK17B//TAOK2//PBK//MARK4//STK33//MASTL//STK39//RELN//EPHB2//FGF4//FGFR3//LYN//ERBB3//STAT3//SEPHS1//IRS1//ITPKB//NAGK//PIK3CD//SH3KBP1//SGMS2//TRIB2//PXK
GO:0016773	phosphotransferase activity, alcohol group as acceptor	Molecular function	42	746	458	15325	1.88385	6.07388e-05	0.00838829	4.21653	PFKP//PFKFB3//DGKZ//DDR1//CDK7//CDK9//IKBKB//IRAK1//MAP3K5//MAP3K11//CCL5//MAP3K12//EIF2AK3//FASTK//RPS6KA6//MINK1//PAN3//ACVR1//GSK3B//MAP3K9//MAPK9//MAPK10//WEE1//CASK//STK17B//TAOK2//PBK//MARK4//STK33//MASTL//STK39//RELN//EPHB2//FGF4//FGFR3//LYN//ERBB3//STAT3//IRS1//ITPKB//NAGK//PIK3CD
GO:0005057	receptor signaling protein activity	Molecular function	12	104	458	15325	3.86085	6.30022e-05	0.00838829	4.20064	ACVR1//STK39//IRAK1//MAPK9//MAPK10//MAP3K9//MAP3K11//MAP3K5//MAP3K12//ERBB3//LYN//NSMAF
GO:0005488	binding	Molecular function	386	11840	458	15325	1.09086	0.000100147	0.0116671	3.99936	VBP1//CHAF1A//DNAJC8//CARS//VAMP3//ACTC1//ACVR1//RHOB//ATP2A2//DDR1//CDK7//CDK9//CSTF2//DDX5//DNM1//EPHB2//ERBB3//FGFR3//GCLC//GNAI2//GNAO1//GSK3B//HSPA6//IKBKB//IRAK1//ITPKB//LYN//MAP3K5//MAP3K9//MAP3K11//MYH11//PEBP1//PFKFB3//PFKP//PIK3CD//MAPK9//MAPK10//RRAD//SCN8A//SMARCA2//UBE2I//WEE1//MAP3K12//RBM10//SMARCA5//DGKZ//CASK//STK17B//TAOK2//EIF2AK3//KIF23//EIF5B//HELZ//WARS2//SYNCRIP//FASTK//ASC…
GO:0004672	protein kinase activity	Molecular function	36	628	458	15325	1.91813	0.000144837	0.0149986	3.83912	ACVR1//GSK3B//IKBKB//IRAK1//MAP3K5//MAP3K9//MAP3K11//MAPK9//MAPK10//WEE1//MAP3K12//CASK//STK17B//TAOK2//EIF2AK3//FASTK//RPS6KA6//MINK1//PBK//MARK4//STK33//MASTL//CDK7//CDK9//STK39//RELN//EPHB2//FGF4//FGFR3//LYN//DDR1//ERBB3//STAT3//IRS1//CCL5//PAN3
GO:0035639	purine ribonucleoside triphosphate binding	Molecular function	80	1829	458	15325	1.46356	0.000272853	0.0243155	3.56407	ACTC1//ACVR1//ATP2A2//DDR1//CARS//CDK7//CDK9//DDX5//EPHB2//ERBB3//FGFR3//GCLC//GSK3B//HSPA6//IKBKB//IRAK1//ITPKB//LYN//MAP3K5//MAP3K9//MAP3K11//MYH11//P2RX4//PEBP1//PFKFB3//PFKP//PIK3CD//MAPK9//MAPK10//SCN8A//SMARCA2//UBE2I//WEE1//MAP3K12//SMARCA5//DGKZ//CASK//STK17B//TAOK2//EIF2AK3//KIF23//HELZ//WARS2//FASTK//ASCC3//DDX52//SEPHS1//CHD5//SACS//RPS6KA6//STK39//TRIB2//ATAD2//EHD4//MINK1//TRPM4//NAG…
GO:0016740	transferase activity	Molecular function	78	1777	458	15325	1.46873	0.000295731	0.0243155	3.5291	PDSS1//CHST2//DGKZ//COQ2//POMGNT1//PFKP//PFKFB3//TRDMT1//REV1//POLN//PARP16//TNKS2//CDS1//SAT1//CASK//NCOA1//TUSC3//DDR1//CDK7//CDK9//IKBKB//IRAK1//MAP3K5//MAP3K11//CCL5//MAP3K12//EIF2AK3//FASTK//RPS6KA6//MINK1//PAN3//ACVR1//GSK3B//MAP3K9//MAPK9//MAPK10//WEE1//STK17B//TAOK2//PBK//MARK4//STK33//MASTL//STK39//RELN//EPHB2//FGF4//FGFR3//LYN//ERBB3//STAT3//SEPHS1//TST//IRS1//CHST1//HS3ST2//NSD1//DOT1L…
GO:0051020	GTPase binding	Molecular function	13	142	458	15325	3.0633	0.000335774	0.0243155	3.47395	RANBP2//NUP153//IPO7//DAAM1//ALS2//FGD1//FGD6//FGD4//FGD5//MAP3K11//DOCK4//DOCK7//RASA1
GO:0031267	small GTPase binding	Molecular function	12	124	458	15325	3.23813	0.000339165	0.0243155	3.46959	RANBP2//NUP153//IPO7//DAAM1//ALS2//MAP3K11//DOCK4//DOCK7//FGD1//FGD6//FGD4//FGD5
GO:0032555	purine ribonucleotide binding	Molecular function	80	1860	458	15325	1.43917	0.000460195	0.028611	3.33706	ACTC1//ACVR1//ATP2A2//DDR1//CARS//CDK7//CDK9//DDX5//EPHB2//ERBB3//FGFR3//GCLC//GSK3B//HSPA6//IKBKB//IRAK1//ITPKB//LYN//MAP3K5//MAP3K9//MAP3K11//MYH11//P2RX4//PEBP1//PFKFB3//PFKP//PIK3CD//MAPK9//MAPK10//SCN8A//SMARCA2//UBE2I//WEE1//MAP3K12//SMARCA5//DGKZ//CASK//STK17B//TAOK2//EIF2AK3//KIF23//HELZ//WARS2//FASTK//ASCC3//DDX52//SEPHS1//CHD5//SACS//RPS6KA6//STK39//TRIB2//ATAD2//EHD4//MINK1//TRPM4//NAG…
GO:0032553	ribonucleotide binding	Molecular function	80	1861	458	15325	1.4384	0.000467829	0.028611	3.32991	ACTC1//ACVR1//ATP2A2//DDR1//CARS//CDK7//CDK9//DDX5//EPHB2//ERBB3//FGFR3//GCLC//GSK3B//HSPA6//IKBKB//IRAK1//ITPKB//LYN//MAP3K5//MAP3K9//MAP3K11//MYH11//P2RX4//PEBP1//PFKFB3//PFKP//PIK3CD//MAPK9//MAPK10//SCN8A//SMARCA2//UBE2I//WEE1//MAP3K12//SMARCA5//DGKZ//CASK//STK17B//TAOK2//EIF2AK3//KIF23//HELZ//WARS2//FASTK//ASCC3//DDX52//SEPHS1//CHD5//SACS//RPS6KA6//STK39//TRIB2//ATAD2//EHD4//MINK1//TRPM4//NAG…
GO:0019901	protein kinase binding	Molecular function	21	313	458	15325	2.24497	0.000491175	0.028611	3.30876	PEBP1//SIRT1//IRS1//ADAM9//HDAC9//SPAG9//MAP3K11//TAOK2//TRAF6//GSK3B//CCNT2//IFNAR2//MAP3K5//PKD1//PTPRK//STAT3//MAP3K12//SOCS1//CCNK//STK39//CCNL1
GO:0017076	purine nucleotide binding	Molecular function	80	1873	458	15325	1.42918	0.00056882	0.0311847	3.24503	ACTC1//ACVR1//ATP2A2//DDR1//CARS//CDK7//CDK9//DDX5//EPHB2//ERBB3//FGFR3//GCLC//GSK3B//HSPA6//IKBKB//IRAK1//ITPKB//LYN//MAP3K5//MAP3K9//MAP3K11//MYH11//P2RX4//PEBP1//PFKFB3//PFKP//PIK3CD//MAPK9//MAPK10//SCN8A//SMARCA2//UBE2I//WEE1//MAP3K12//SMARCA5//DGKZ//CASK//STK17B//TAOK2//EIF2AK3//KIF23//HELZ//WARS2//FASTK//ASCC3//DDX52//SEPHS1//CHD5//SACS//RPS6KA6//STK39//TRIB2//ATAD2//EHD4//MINK1//TRPM4//NAG…
GO:0035258	steroid hormone receptor binding	Molecular function	8	64	458	15325	4.18259	0.000610614	0.0316162	3.21423	DDX5//NSD1//FOXQ1//PPARGC1B//STAT3//CDK7//TGFB1I1//NCOA1
GO:0019900	kinase binding	Molecular function	22	358	458	15325	2.05624	0.00116803	0.057295	2.93255	PEBP1//SIRT1//IRS1//ADAM9//HDAC9//SPAG9//CCNT2//GSK3B//IFNAR2//MAP3K5//PKD1//PTPRK//STAT3//TRAF6//MAP3K12//SOCS1//CCNK//STK39//CCNL1//MAP3K11//TAOK2//SNAI1
GO:0005102	receptor binding	Molecular function	50	1093	458	15325	1.53068	0.00170159	0.0745526	2.76915	ARRB2//GNAI2//IRS1//FGF4//BAMBI//CTHRC1//JAG2//NCOR2//DLL4//IL1A//IRAK1//DOK6//SOCS1//LYN//COL4A3//L1CAM//SFRP2//TNXB//ADAM9//ADAM22//DOCK4//CCL1//CCL5//FGF14//ARID1A//NCOA1//NSD1//DDX5//FOXQ1//PPARGC1B//GRM5//ADRB1//STAT3//GNAO1//REEP1//APP//TGFB1I1//CDK7//RELN//FGB//FKBP1B//LAMA3//P2RX4//PEBP1//SERPINE1//RASA1//FZD8//LGI1//RND1//CAPRIN2
GO:0004674	protein serine/threonine kinase activity	Molecular function	25	441	458	15325	1.89687	0.00172175	0.0745526	2.76403	ACVR1//CDK7//CDK9//EIF2AK3//STK39//IRAK1//MAPK9//MAPK10//MAP3K9//MAP3K11//MAP3K5//MAP3K12//IKBKB//FASTK//GSK3B//WEE1//CASK//STK17B//TAOK2//RPS6KA6//MINK1//PBK//MARK4//STK33//MASTL
GO:0005524	ATP binding	Molecular function	64	1486	458	15325	1.44111	0.00175983	0.0745526	2.75453	ACTC1//ACVR1//ATP2A2//DDR1//CARS//CDK7//CDK9//DDX5//EPHB2//ERBB3//FGFR3//GCLC//GSK3B//HSPA6//IKBKB//IRAK1//ITPKB//LYN//MAP3K5//MAP3K9//MAP3K11//MYH11//P2RX4//PEBP1//PFKFB3//PFKP//PIK3CD//MAPK9//MAPK10//SCN8A//SMARCA2//UBE2I//WEE1//MAP3K12//SMARCA5//DGKZ//CASK//STK17B//TAOK2//EIF2AK3//KIF23//HELZ//WARS2//FASTK//ASCC3//DDX52//SEPHS1//CHD5//SACS//RPS6KA6//STK39//TRIB2//ATAD2//EHD4//MINK1//TRPM4//NAG…
GO:0004709	MAP kinase kinase kinase activity	Molecular function	4	20	458	15325	6.69214	0.00260708	0.101419	2.58385	MAP3K9//MAP3K11//MAP3K5//MAP3K12
GO:0032559	adenyl ribonucleotide binding	Molecular function	64	1511	458	15325	1.41726	0.0026222	0.101419	2.58133	ACTC1//ACVR1//ATP2A2//DDR1//CARS//CDK7//CDK9//DDX5//EPHB2//ERBB3//FGFR3//GCLC//GSK3B//HSPA6//IKBKB//IRAK1//ITPKB//LYN//MAP3K5//MAP3K9//MAP3K11//MYH11//P2RX4//PEBP1//PFKFB3//PFKP//PIK3CD//MAPK9//MAPK10//SCN8A//SMARCA2//UBE2I//WEE1//MAP3K12//SMARCA5//DGKZ//CASK//STK17B//TAOK2//EIF2AK3//KIF23//HELZ//WARS2//FASTK//ASCC3//DDX52//SEPHS1//CHD5//SACS//RPS6KA6//STK39//TRIB2//ATAD2//EHD4//MINK1//TRPM4//NAG…
GO:0005112	Notch binding	Molecular function	3	10	458	15325	10.0382	0.00272048	0.101419	2.56535	JAG2//NCOR2//DLL4
GO:0042802	identical protein binding	Molecular function	37	768	458	15325	1.61204	0.00290379	0.10409	2.53704	ACVR1//CARS//CAT//ARID3A//ECE1//ERBB3//FAP//GJB1//IRAK1//MAP3K5//MAP3K9//MAP3K11//P2RX4//PVRL2//CCL5//SLC11A1//ZNF174//MAP3K12//HAND1//TIMM10//TOX3//ALS2//SNX6//TRIM8//TRIM9//SYT6//APP//DNM1//L1CAM//NEFL//OMG//CLDN11//ZNF3//EED//TRIP10//EIF2AK3//SIRT1
GO:0030554	adenyl nucleotide binding	Molecular function	64	1521	458	15325	1.40795	0.00305953	0.10561	2.51435	ACTC1//ACVR1//ATP2A2//DDR1//CARS//CDK7//CDK9//DDX5//EPHB2//ERBB3//FGFR3//GCLC//GSK3B//HSPA6//IKBKB//IRAK1//ITPKB//LYN//MAP3K5//MAP3K9//MAP3K11//MYH11//P2RX4//PEBP1//PFKFB3//PFKP//PIK3CD//MAPK9//MAPK10//SCN8A//SMARCA2//UBE2I//WEE1//MAP3K12//SMARCA5//DGKZ//CASK//STK17B//TAOK2//EIF2AK3//KIF23//HELZ//WARS2//FASTK//ASCC3//DDX52//SEPHS1//CHD5//SACS//RPS6KA6//STK39//TRIB2//ATAD2//EHD4//MINK1//TRPM4//NAG…
GO:0000166	nucleotide binding	Molecular function	93	2379	458	15325	1.30805	0.00327608	0.109047	2.48465	ACTC1//ACVR1//ATP2A2//DDR1//CARS//CDK7//CDK9//DDX5//EPHB2//ERBB3//FGFR3//GCLC//GSK3B//HSPA6//IKBKB//IRAK1//ITPKB//LYN//MAP3K5//MAP3K9//MAP3K11//MYH11//P2RX4//PEBP1//PFKFB3//PFKP//PIK3CD//MAPK9//MAPK10//SCN8A//SMARCA2//UBE2I//WEE1//MAP3K12//SMARCA5//DGKZ//CASK//STK17B//TAOK2//EIF2AK3//KIF23//HELZ//WARS2//FASTK//ASCC3//DDX52//SEPHS1//CHD5//SACS//RPS6KA6//STK39//TRIB2//ATAD2//EHD4//MINK1//TRPM4//NAG…
GO:0008134	transcription factor binding	Molecular function	22	391	458	15325	1.8827	0.00348367	0.111958	2.45796	GSK3B//SPEN//NEUROD1//NHLH2//NSD1//UBE2I//HAND1//SIRT1//TLE4//HDAC9//APBB1//E2F5//NAB2//MAPK9//STAT3//CAMTA2//DIP2A//TRIB2//DOT1L//FOXQ1//PRICKLE1//HES5
GO:0003755	peptidyl-prolyl cis-trans isomerase activity	Molecular function	5	37	458	15325	4.52172	0.00461936	0.138236	2.33542	FKBP1B//FKBP3//PPID//RANBP2//PPIL3
GO:0008536	Ran GTPase binding	Molecular function	3	12	458	15325	8.36517	0.00477029	0.138236	2.32146	RANBP2//NUP153//IPO7
GO:0042803	protein homodimerization activity	Molecular function	26	504	458	15325	1.72615	0.005001	0.138236	2.30094	ACVR1//CARS//CAT//ARID3A//ECE1//ERBB3//FAP//GJB1//IRAK1//MAP3K5//MAP3K9//MAP3K11//P2RX4//PVRL2//CCL5//SLC11A1//ZNF174//MAP3K12//HAND1//TIMM10//TOX3//ALS2//SNX6//TRIM8//TRIM9//SYT6
GO:0003682	chromatin binding	Molecular function	15	237	458	15325	2.11777	0.00518717	0.138236	2.28507	SMARCA5//APBB1//HOXD10//NEUROD1//SIX1//TLE4//NCOA1//EED//CHAF1A//MORF4L1//CAMTA2//TOX3//TSHZ3//NSD1//HES5
GO:0016859	cis-trans isomerase activity	Molecular function	5	38	458	15325	4.40272	0.00519125	0.138236	2.28473	FKBP1B//FKBP3//PPID//RANBP2//PPIL3
GO:0050681	androgen receptor binding	Molecular function	5	38	458	15325	4.40272	0.00519125	0.138236	2.28473	CDK7//DDX5//TGFB1I1//NCOA1//NSD1
GO:0005089	Rho guanyl-nucleotide exchange factor activity	Molecular function	7	75	458	15325	3.123	0.00702281	0.177615	2.15349	ALS2//FGD1//SOS2//MCF2L//FGD6//FGD4//FGD5
GO:0042826	histone deacetylase binding	Molecular function	6	58	458	15325	3.46145	0.00750896	0.177615	2.12442	KPNA2//TRAF6//NCOR2//HDAC9//CAMTA2//ANKRA2
GO:0005178	integrin binding	Molecular function	7	76	458	15325	3.08191	0.00754192	0.177615	2.12252	COL4A3//L1CAM//LYN//SFRP2//TNXB//ADAM9//ADAM22
GO:0051019	mitogen-activated protein kinase binding	Molecular function	3	14	458	15325	7.17015	0.00754991	0.177615	2.12206	SPAG9//PEBP1//SIRT1
GO:0046983	protein dimerization activity	Molecular function	34	734	458	15325	1.54995	0.00762297	0.177615	2.11788	ACVR1//CARS//CAT//ARID3A//ECE1//ERBB3//FAP//GJB1//IRAK1//MAP3K5//MAP3K9//MAP3K11//P2RX4//PVRL2//CCL5//SLC11A1//ZNF174//MAP3K12//HAND1//TIMM10//TOX3//ALS2//SNX6//TRIM8//TRIM9//SYT6//ADRB1//GCLC//NEUROD1//PDSS1//NPAS4//PRKRIR//STAT3//SLC24A2
GO:0036094	small molecule binding	Molecular function	96	2547	458	15325	1.26118	0.00798713	0.177739	2.09761	ACTC1//ACVR1//RHOB//ATP2A2//DDR1//CARS//CDK7//CDK9//CSTF2//DDX5//DNM1//EPHB2//ERBB3//FGFR3//GCLC//GNAI2//GNAO1//GSK3B//HSPA6//IKBKB//IRAK1//ITPKB//LYN//MAP3K5//MAP3K9//MAP3K11//MYH11//PEBP1//PFKFB3//PFKP//PIK3CD//MAPK9//MAPK10//RRAD//SCN8A//SMARCA2//UBE2I//WEE1//MAP3K12//RBM10//SMARCA5//DGKZ//CASK//STK17B//TAOK2//EIF2AK3//KIF23//EIF5B//HELZ//WARS2//SYNCRIP//FASTK//ASCC3//RAB32//CPSF6//DDX52//SEPH…
GO:0030331	estrogen receptor binding	Molecular function	4	27	458	15325	4.95714	0.0080097	0.177739	2.09638	DDX5//NSD1//FOXQ1//PPARGC1B
GO:0005516	calmodulin binding	Molecular function	11	159	458	15325	2.31489	0.0083026	0.179954	2.08079	CNN1//EPB41//ITPKB//MAP2//MYH11//PPP3R1//RGS2//RRAD//CASK//TRPM4//TRPV6
GO:0005248	voltage-gated sodium channel activity	Molecular function	3	15	458	15325	6.69214	0.00923068	0.195523	2.03477	SCN2A//SCN8A//SCN9A
GO:0003924	GTPase activity	Molecular function	14	231	458	15325	2.02792	0.00977808	0.200794	2.00975	RHOB//DNM1//GNAI2//GNAO1//GNG10//RRAD//EIF5B//GNB5//RAB21//RAB38//RND1//EHD4//RASD1//RHEBL1
GO:0004713	protein tyrosine kinase activity	Molecular function	11	163	458	15325	2.25808	0.00991044	0.200794	2.00391	DDR1//ERBB3//LYN//STAT3//WEE1//EPHB2//FGFR3//IRS1//FGF4//MAP3K9//MAP3K11
GO:0030695	GTPase regulator activity	Molecular function	22	432	458	15325	1.70402	0.010814	0.214439	1.96602	IPO7//MINK1//FGD1//GNAI2//SOS2//DOCK4//MCF2L//FGD6//ALS2//DOCK7//FGD4//FGD5//IQSEC1//BNIP2//RGS2//RGS10//TBC1D8//TBC1D9B//TBC1D10B//DEPDC1B//ARHGAP21//RASA1
GO:0048365	Rac GTPase binding	Molecular function	3	16	458	15325	6.27388	0.0111124	0.215766	1.95419	MAP3K11//DOCK4//DOCK7
GO:0030165	PDZ domain binding	Molecular function	7	83	458	15325	2.82199	0.0120021	0.228285	1.92074	ADRB1//L1CAM//SFRP2//FZD8//CRIPT//DOCK4//USHBP1
GO:0035257	nuclear hormone receptor binding	Molecular function	8	105	458	15325	2.54939	0.0133763	0.249335	1.87366	NSD1//DDX5//FOXQ1//PPARGC1B//STAT3//CDK7//TGFB1I1//NCOA1
GO:0005085	guanyl-nucleotide exchange factor activity	Molecular function	11	171	458	15325	2.15244	0.0138347	0.252823	1.85903	IQSEC1//ALS2//FGD1//SOS2//MCF2L//FGD6//FGD4//FGD5//GNAI2//DOCK4//DOCK7
GO:0060589	nucleoside-triphosphatase regulator activity	Molecular function	22	444	458	15325	1.65796	0.0144673	0.259298	1.83961	IPO7//MINK1//FGD1//GNAI2//SOS2//DOCK4//MCF2L//FGD6//ALS2//DOCK7//FGD4//FGD5//IQSEC1//BNIP2//RGS2//RGS10//TBC1D8//TBC1D9B//TBC1D10B//DEPDC1B//ARHGAP21//RASA1
GO:0030234	enzyme regulator activity	Molecular function	40	946	458	15325	1.41483	0.0168128	0.289212	1.77436	DGKZ//SOCS1//TRIB2//PPP1R11//CAST//APP//PEBP1//SERPINE1//AHSG//BIRC6//IPO7//MINK1//FGD1//GNAI2//SOS2//DOCK4//MCF2L//FGD6//ALS2//DOCK7//FGD4//FGD5//IQSEC1//BNIP2//RGS2//RGS10//TBC1D8//TBC1D9B//TBC1D10B//DEPDC1B//ARHGAP21//RASA1//CTSA//COL4A3//SFRP2//WBP11//MAP3K5//CCL5//ERBB3//FOXQ1
GO:0005048	signal sequence binding	Molecular function	3	19	458	15325	5.28327	0.0179982	0.289212	1.74477	KDELR1//KPNA2//SRP14
GO:0016922	ligand-dependent nuclear receptor binding	Molecular function	3	19	458	15325	5.28327	0.0179982	0.289212	1.74477	ARID1A//NCOA1//NSD1
GO:0019200	carbohydrate kinase activity	Molecular function	3	19	458	15325	5.28327	0.0179982	0.289212	1.74477	PFKP//PFKFB3//NAGK
GO:0043236	laminin binding	Molecular function	3	19	458	15325	5.28327	0.0179982	0.289212	1.74477	NTN4//BCAM//ADAM9
GO:0043425	bHLH transcription factor binding	Molecular function	3	19	458	15325	5.28327	0.0179982	0.289212	1.74477	UBE2I//HAND1//SIRT1
GO:0017016	Ras GTPase binding	Molecular function	8	112	458	15325	2.39005	0.0190849	0.301477	1.71931	RANBP2//NUP153//IPO7//DAAM1//ALS2//MAP3K11//DOCK4//DOCK7
GO:0005083	small GTPase regulator activity	Molecular function	15	277	458	15325	1.81195	0.0197082	0.306134	1.70535	IQSEC1//ALS2//FGD1//SOS2//MCF2L//FGD6//FGD4//FGD5//TBC1D8//TBC1D9B//TBC1D10B//RASA1//DOCK4//IPO7//MINK1
GO:0005088	Ras guanyl-nucleotide exchange factor activity	Molecular function	7	92	458	15325	2.54592	0.0201961	0.30857	1.69473	ALS2//FGD1//SOS2//MCF2L//FGD6//FGD4//FGD5
GO:0071813	lipoprotein particle binding	Molecular function	3	21	458	15325	4.7801	0.0236424	0.349758	1.62631	SORL1//ANKRA2//VLDLR
GO:0071814	protein-lipid complex binding	Molecular function	3	21	458	15325	4.7801	0.0236424	0.349758	1.62631	SORL1//ANKRA2//VLDLR
GO:0003712	transcription cofactor activity	Molecular function	21	442	458	15325	1.58976	0.0250823	0.354376	1.60063	MED12L//PPARGC1B//NEUROD1//SMARCA2//CDK7//DDX5//SMARCD2//TGFB1I1//ARID1A//KLF7//NCOA1//TRIP11//HAND1//WWC1//NAB2//TSG101//NCOR2//HDAC9//SPEN//SIRT1//NSD1
GO:0003713	transcription coactivator activity	Molecular function	14	261	458	15325	1.79483	0.0255009	0.354376	1.59344	NEUROD1//SMARCA2//TSG101//NCOA1//PPARGC1B//CDK7//DDX5//SMARCD2//TGFB1I1//ARID1A//KLF7//TRIP11//HAND1//WWC1
GO:0001664	G-protein coupled receptor binding	Molecular function	11	188	458	15325	1.95781	0.0259381	0.354376	1.58606	BAMBI//CTHRC1//CCL1//CCL5//GRM5//ADRB1//ARRB2//STAT3//GNAO1//REEP1//GNAI2
GO:0004435	phosphatidylinositol phospholipase C activity	Molecular function	4	38	458	15325	3.52218	0.0260754	0.354376	1.58377	GNAI2//GNAO1//PLCB4//CCL5
GO:0008375	acetylglucosaminyltransferase activity	Molecular function	4	38	458	15325	3.52218	0.0260754	0.354376	1.58377	POMGNT1//MGAT4B//B3GNT1//LARGE
GO:0032403	protein complex binding	Molecular function	14	262	458	15325	1.78798	0.026236	0.354376	1.5811	IRS1//DOK6//COL4A3//L1CAM//LYN//SFRP2//TNXB//ADAM9//ADAM22//GNAI2//GNAO1//ACVR1//SACS//CDK7
GO:0005261	cation channel activity	Molecular function	15	289	458	15325	1.73671	0.0274925	0.366044	1.56079	P2RX4//FKBP1B//TRPM4//KCNJ3//CACNB2//SCN2A//SCN8A//SCN9A//KCTD3//KCTD5//TRPA1//SLC24A2//TRPV6//HPN//PKD1
GO:0051427	hormone receptor binding	Molecular function	8	121	458	15325	2.21228	0.0287391	0.377251	1.54153	NSD1//DDX5//FOXQ1//PPARGC1B//NCOA1//STAT3//CDK7//TGFB1I1
GO:0051119	sugar transmembrane transporter activity	Molecular function	3	23	458	15325	4.36444	0.030134	0.385695	1.52094	SLC35A5//SLC2A4//M6PR
GO:0008238	exopeptidase activity	Molecular function	7	100	458	15325	2.34225	0.03021	0.385695	1.51985	METAP1//DNPEP//DPP8//CTSA//CPZ//FAP//HPN
GO:0000989	transcription factor binding transcription factor activity	Molecular function	21	455	458	15325	1.54434	0.0328953	0.403649	1.48287	MED12L//PPARGC1B//NEUROD1//SMARCA2//SPEN//NSD1//CDK7//DDX5//SMARCD2//TGFB1I1//ARID1A//KLF7//NCOA1//TRIP11//HAND1//WWC1//NAB2//TSG101//NCOR2//HDAC9//SIRT1
GO:0004716	receptor signaling protein tyrosine kinase activity	Molecular function	2	10	458	15325	6.69214	0.0342149	0.403649	1.46578	ERBB3//LYN
GO:0008239	dipeptidyl-peptidase activity	Molecular function	2	10	458	15325	6.69214	0.0342149	0.403649	1.46578	FAP//DPP8
GO:0016812	hydrolase activity, acting on carbon-nitrogen (but not peptide) bonds, in cyclic amides	Molecular function	2	10	458	15325	6.69214	0.0342149	0.403649	1.46578	DPYSL2//DPYSL5
GO:0016868	intramolecular transferase activity, phosphotransferases	Molecular function	2	10	458	15325	6.69214	0.0342149	0.403649	1.46578	PGM3//PGM1
GO:0031434	mitogen-activated protein kinase kinase binding	Molecular function	2	10	458	15325	6.69214	0.0342149	0.403649	1.46578	MAP3K11//TAOK2
GO:0005525	GTP binding	Molecular function	18	377	458	15325	1.59759	0.0347844	0.405239	1.45861	RHOB//DNM1//GNAI2//GNAO1//RRAD//EIF5B//DOCK4//RAB32//SEPHS1//RAB21//RAB38//RND1//EHD4//RASD1//SEPT3//DOCK7//RHEBL1//ARL10
GO:0015267	channel activity	Molecular function	20	433	458	15325	1.54553	0.0364778	0.414601	1.43797	P2RX4//GABRB1//TRPA1//TRPM4//TRPV6//FKBP1B//KCNJ3//GJA5//GJB1//CACNB2//SCN2A//SCN8A//SCN9A//GPR89B//KCTD3//KCTD5//PKD1//SLC24A2//GPR89A//HPN
GO:0022803	passive transmembrane transporter activity	Molecular function	20	433	458	15325	1.54553	0.0364778	0.414601	1.43797	P2RX4//GABRB1//TRPA1//TRPM4//TRPV6//FKBP1B//KCNJ3//GJA5//GJB1//CACNB2//SCN2A//SCN8A//SCN9A//GPR89B//KCTD3//KCTD5//PKD1//SLC24A2//GPR89A//HPN
GO:0017147	Wnt-protein binding	Molecular function	3	25	458	15325	4.01528	0.0374653	0.417243	1.42637	SFRP2//FZD8//CTHRC1
GO:0004721	phosphoprotein phosphatase activity	Molecular function	10	175	458	15325	1.91204	0.0376056	0.417243	1.42475	PPP6C//MTMR3//PPM1L//PPP3R1//PTPN2//PTPN13//PTPRK//DUSP11//PTPDC1//PTPN4
GO:0019904	protein domain specific binding	Molecular function	23	519	458	15325	1.48284	0.0392166	0.429403	1.40653	LYN//ADAM9//SH2D2A//QKI//DOCK4//SH3KBP1//MICAL1//ADRB1//L1CAM//SFRP2//FZD8//CRIPT//USHBP1//IRS1//SYNGR3//UBE2I//SIRT1//PPARGC1B//WBP11//APP//CHAF1A//PKD1//ZNF521
GO:0030296	protein tyrosine kinase activator activity	Molecular function	2	11	458	15325	6.08376	0.0410053	0.429403	1.38716	CCL5//ERBB3
GO:0046934	phosphatidylinositol-4,5-bisphosphate 3-kinase activity	Molecular function	2	11	458	15325	6.08376	0.0410053	0.429403	1.38716	IRS1//PIK3CD
GO:0050321	tau-protein kinase activity	Molecular function	2	11	458	15325	6.08376	0.0410053	0.429403	1.38716	GSK3B//MARK4
GO:0052813	phosphatidylinositol bisphosphate kinase activity	Molecular function	2	11	458	15325	6.08376	0.0410053	0.429403	1.38716	IRS1//PIK3CD
GO:0019199	transmembrane receptor protein kinase activity	Molecular function	6	85	458	15325	2.36193	0.0417213	0.432048	1.37964	ACVR1//DDR1//ERBB3//EPHB2//FGFR3//IRS1
GO:0004725	protein tyrosine phosphatase activity	Molecular function	7	108	458	15325	2.16875	0.0431214	0.437742	1.36531	PTPN2//PTPN4//PTPRK//PTPN13//DUSP11//MTMR3//PTPDC1
GO:0000988	protein binding transcription factor activity	Molecular function	21	469	458	15325	1.49824	0.0432106	0.437742	1.36441	MED12L//PPARGC1B//NEUROD1//SMARCA2//SPEN//NSD1//CDK7//DDX5//SMARCD2//TGFB1I1//ARID1A//KLF7//NCOA1//TRIP11//HAND1//WWC1//NAB2//TSG101//NCOR2//HDAC9//SIRT1
GO:0008022	protein C-terminus binding	Molecular function	9	156	458	15325	1.93042	0.0447512	0.438327	1.34919	AP2A1//ATP2A2//CDK7//NEFL//UBE2I//DGKZ//TRIM3//SIRT1//PXK
GO:0019001	guanyl nucleotide binding	Molecular function	18	389	458	15325	1.54831	0.0449156	0.438327	1.3476	RHOB//DNM1//GNAI2//GNAO1//RRAD//EIF5B//DOCK4//RAB32//SEPHS1//RAB21//RAB38//RND1//EHD4//RASD1//SEPT3//DOCK7//RHEBL1//ARL10
GO:0032561	guanyl ribonucleotide binding	Molecular function	18	389	458	15325	1.54831	0.0449156	0.438327	1.3476	RHOB//DNM1//GNAI2//GNAO1//RRAD//EIF5B//DOCK4//RAB32//SEPHS1//RAB21//RAB38//RND1//EHD4//RASD1//SEPT3//DOCK7//RHEBL1//ARL10
GO:0003824	catalytic activity	Molecular function	177	5334	458	15325	1.11034	0.0451602	0.438327	1.34524	TXNL1//PDSS1//RHOB//DNM1//GNAI2//GNAO1//GNG10//RRAD//EIF5B//GNB5//RAB21//RAB38//RND1//EHD4//RASD1//RHEBL1//CHST2//DGKZ//COQ2//DDX5//FKBP1B//FKBP3//PPID//RANBP2//PPIL3//MYH11//KIF23//KLC4//FAP//HPN//KLK15//POMGNT1//PAFAH2//PFKP//PFKFB3//TRDMT1//REV1//POLN//NAGPA//PARP16//TNKS2//CAT//C20ORF3//PDE8A//CDS1//SAT1//DPYSL2//ECE1//METAP1//DNPEP//DPP8//CTSA//CPZ//USP44//USP48//USP27X//ADAM9//ADAMTS6//ADAM…
GO:0015144	carbohydrate transmembrane transporter activity	Molecular function	3	27	458	15325	3.71786	0.0456199	0.438327	1.34085	SLC35A5//SLC2A4//M6PR
GO:0017048	Rho GTPase binding	Molecular function	4	46	458	15325	2.90963	0.0479478	0.445258	1.31923	MAP3K11//DOCK4//DOCK7//DAAM1
GO:0005262	calcium channel activity	Molecular function	6	88	458	15325	2.28141	0.0480543	0.445258	1.31827	FKBP1B//CACNB2//TRPA1//SLC24A2//TRPM4//TRPV6
GO:0005149	interleukin-1 receptor binding	Molecular function	2	12	458	15325	5.57678	0.0482523	0.445258	1.31648	IL1A//IRAK1
GO:0010576	metalloenzyme regulator activity	Molecular function	2	12	458	15325	5.57678	0.0482523	0.445258	1.31648	COL4A3//SFRP2
GO:0004714	transmembrane receptor protein tyrosine kinase activity	Molecular function	5	67	458	15325	2.49707	0.0497358	0.454449	1.30333	EPHB2//FGFR3//IRS1//DDR1//ERBB3

## Sheet: down-BP
#Column "GO.ID" stands for the ID of gene ontology term
#Column "Term" stands for the name of gene ontology term
#Column "Ontology" stands for the ontology of GOID belongs to
#Column "Count" stands for the number of DE genes associated with the listed GOID
#Column "Pop.Hits" stands for the number of background population genes associated with the listed GOID
#Column "List.Total" stands for the total number of DE genes
#Column "Pop.Total" stands for the total number of background population genes
#Column "Fold.Enrichment" stands for the Fold Enrichment value of the GOID, it equals (Count/Pop.Hits)/(List.Total/Pop.Total)
#Column "Pvalue" stands for the significance testing value of the GOID
#Column "FDR" stands for the false discovery rate of the GOID, using Benjamini & Hochberg (1995) method
#Column "Enrichment.Score" stands for the Enrichment Score value of the GOID, it equals (-log10(Pvalue))
#Column "GENES" stands for the DE genes associated with the GOID
GO.ID	Term	Ontology	Count	Pop.Hits	List.Total	Pop.Total	Fold.Enrichment	Pvalue	FDR	Enrichment.Score	GENES
GO:0010646	regulation of cell communication	Biological process	77	1292	410	14742	2.14289	8.69239e-11	3.68757e-07	10.0609	DUSP2//PPP2R1A//DUSP16//SNCA//AGPAT1//WNT3A//SOX17//FBXW7//CACNA1E//TFAP2B//PTH//BRAP//SOCS6//SNX13//VEGFA//NLGN1//SNCG//IL8//KCNN4//SMPD1//FGFR2//MBD2//ZEB2//NLK//CDKN1C//SMAD7//BAMBI//TCF7L2//SLC6A4//NISCH//USP46//TAOK2//TAOK3//BCL6//SNX14//AP2A1//CDC42//IRF1//IL15//SOCS1//RHOC//EDA//IKBKB//IL1A//CC2D1A//ESR1//WWC1//ZNF622//PDE3B//UBE2B//MAP3K11//WNT7A//MAP2K1//RASGRF1//RASA1//ENPP1//SIRT4//SYT…
GO:0023051	regulation of signaling	Biological process	95	1789	410	14742	1.90935	2.0477e-10	3.68757e-07	9.68873	MAP3K11//PAK3//MAP2K1//MAP3K2//DUSP2//PPP2R1A//DUSP16//SNCA//BVES//AGPAT1//WNT3A//SOX17//FBXW7//APP//ZFP91//WNT7A//FGD4//CACNA1E//TFAP2B//FGFR2//TSPYL2//PTH//BRAP//SOCS6//SNX13//VEGFA//NLGN1//SNCG//IL8//SMAD7//KCNN4//SMPD1//MBD2//ZEB2//NLK//CDKN1C//BAMBI//PSD//PSD3//TCF7L2//SLC6A4//NISCH//USP46//SMAP1//BCL6//CRK//RASA1//RASGRF1//SOS1//EPHA2//TAOK2//TAOK3//CARM1//ITSN1//ARHGEF3//FGD5//WWC1//SNX14/…
GO:0009966	regulation of signal transduction	Biological process	86	1563	410	14742	1.97839	3.2776e-10	3.68757e-07	9.48444	MAP3K11//PAK3//MAP2K1//MAP3K2//DUSP2//PPP2R1A//DUSP16//AGPAT1//SOX17//FBXW7//APP//ZFP91//WNT7A//FGD4//FGFR2//PTH//BRAP//SOCS6//SNX13//SNCA//VEGFA//NLGN1//IL8//SMAD7//KCNN4//SMPD1//MBD2//ZEB2//NLK//TFAP2B//CDKN1C//BAMBI//PSD//PSD3//SMAP1//BVES//BCL6//CRK//RASA1//RASGRF1//SOS1//EPHA2//TAOK2//TAOK3//CARM1//ITSN1//ARHGEF3//FGD5//WWC1//SNX14//AP2A1//CDC42//IRF1//IL15//SOCS1//RHOC//EDA//IKBKB//IL1A//CC…
GO:0048519	negative regulation of biological process	Biological process	131	2838	410	14742	1.65971	3.70856e-10	3.68757e-07	9.43079	CDC25A//CHEK1//MCM3//PSMD7//WEE1//XPC//CDC23//WAC//RFWD2//BCL6//CDKN1C//EZH1//FGFR2//HIVEP1//SMAD7//NFIB//PTH//TCF7L2//TFAP2B//TLE4//MBD2//HAND1//NCOR2//SPEN//ZFPM2//SALL4//SOX17//DUSP2//PPP2R1A//DUSP16//LRP6//KRIT1//RASA1//CASK//WNT3A//SIRT4//UBE2B//ALOX12//IKBKB//IL1A//SNCA//SON//VEGFA//FAIM3//MYO18A//PCBP4//KATNB1//DBC1//IL8//MLF1//MAP2K1//CUL2//SESN1//HTRA2//TP53INP1//PDE3B//TGFBI//WAPAL//TSP…
GO:0050794	regulation of cellular process	Biological process	270	7509	410	14742	1.29287	4.3261e-10	3.68757e-07	9.3639	KPNA2//CDC25A//CHEK1//MCM3//PSMD7//WEE1//XPC//CDC23//WAC//RFWD2//CCNE1//CCNT2//CDKN1C//CCNL2//BCL6//EZH1//FGFR2//HIVEP1//SMAD7//NFIB//PTH//TCF7L2//TFAP2B//TLE4//MBD2//HAND1//NCOR2//SPEN//ZFPM2//SALL4//SOX17//MAP3K1//PAK3//MAP2K1//BRAP//TAOK3//NLK//CRK//TAOK2//MAP3K11//MAP3K2//DUSP2//PPP2R1A//DUSP16//BBC3//SNCA//BVES//SOCS1//LRP6//AKTIP//WNT3A//KRIT1//VEGFA//RASA1//CASK//AGPAT1//IKBKB//SCN1B//CARM…
GO:0019222	regulation of metabolic process	Biological process	189	4717	410	14742	1.44068	1.08088e-09	7.67782e-07	8.96622	KPNA2//CCNE1//CCNT2//CDC25A//CDKN1C//CCNL2//BCL6//EZH1//FGFR2//HIVEP1//SMAD7//NFIB//PTH//TCF7L2//TFAP2B//TLE4//MBD2//HAND1//NCOR2//SPEN//ZFPM2//SALL4//SOX17//CRK//MAP3K1//MAP2K1//TAOK2//MAP3K11//PAK3//MAP3K2//DUSP2//PPP2R1A//DUSP16//SNCA//BVES//SOCS1//LRP6//AKTIP//WNT3A//FBXW7//SIRT4//CHEK1//UBE2B//RUNX1T1//ELAVL2//ESR1//FLI1//HDGF//MLL//NDN//NONO//POU3F1//PKN2//ARID4A//TARBP2//TCF3//TMPO//ZFX//R…
GO:0050789	regulation of biological process	Biological process	279	7933	410	14742	1.26456	1.8851e-09	1.00667e-06	8.72466	KPNA2//CDC25A//CHEK1//MCM3//PSMD7//WEE1//XPC//CDC23//WAC//RFWD2//CCNE1//CCNT2//CDKN1C//CCNL2//BCL6//EZH1//FGFR2//HIVEP1//SMAD7//NFIB//PTH//TCF7L2//TFAP2B//TLE4//MBD2//HAND1//NCOR2//SPEN//ZFPM2//SALL4//SOX17//MAP3K1//PAK3//MAP2K1//BRAP//TAOK3//NLK//CRK//TAOK2//MAP3K11//MAP3K2//DUSP2//PPP2R1A//DUSP16//AGPAT1//BBC3//SNCA//BVES//SOCS1//LRP6//AKTIP//WNT3A//KRIT1//VEGFA//RASA1//CASK//CACNA1E//P2RX4//NL…
GO:0031323	regulation of cellular metabolic process	Biological process	175	4287	410	14742	1.46777	1.88957e-09	1.00667e-06	8.72364	KPNA2//CCNE1//CCNT2//CDC25A//CDKN1C//CCNL2//BCL6//EZH1//FGFR2//HIVEP1//SMAD7//NFIB//PTH//TCF7L2//TFAP2B//TLE4//MBD2//HAND1//NCOR2//SPEN//ZFPM2//SALL4//SOX17//CRK//MAP3K1//MAP2K1//TAOK2//MAP3K11//PAK3//MAP3K2//DUSP2//PPP2R1A//DUSP16//SNCA//BVES//SOCS1//LRP6//AKTIP//WNT3A//FBXW7//SIRT4//CHEK1//UBE2B//RUNX1T1//ELAVL2//ESR1//FLI1//HDGF//MLL//NDN//NONO//POU3F1//PKN2//ARID4A//TARBP2//TCF3//TMPO//ZFX//R…
GO:0048583	regulation of response to stimulus	Biological process	102	2080	410	14742	1.76323	3.14189e-09	1.42903e-06	8.50281	MAP3K11//PAK3//MAP2K1//MAP3K2//DUSP2//PPP2R1A//DUSP16//AGPAT1//IKBKB//MAP3K1//BCL6//SOX17//C1QA//FBXW7//APP//ZFP91//WNT7A//FGD4//FGFR2//TSPYL2//PTH//BRAP//SOCS6//SNX13//CHEK1//SNCA//VEGFA//NLGN1//IL8//SMAD7//KCNN4//SMPD1//MBD2//ZEB2//NLK//TFAP2B//CDKN1C//BAMBI//PSD//PSD3//SMAP1//BVES//CRK//RASA1//RASGRF1//SOS1//EPHA2//TAOK2//TAOK3//CARM1//ITSN1//ARHGEF3//FGD5//WWC1//SNX14//AP2A1//CDC42//IRF1//IL1…
GO:0065007	biological regulation	Biological process	290	8387	410	14742	1.24327	3.35295e-09	1.42903e-06	8.47457	KPNA2//CDC25A//CHEK1//MCM3//PSMD7//WEE1//XPC//CDC23//WAC//RFWD2//CCNE1//CCNT2//CDKN1C//CCNL2//BCL6//EZH1//FGFR2//HIVEP1//SMAD7//NFIB//PTH//TCF7L2//TFAP2B//TLE4//MBD2//HAND1//NCOR2//SPEN//ZFPM2//SALL4//SOX17//MAP3K1//PAK3//MAP2K1//BRAP//TAOK3//NLK//CRK//TAOK2//MAP3K11//MAP3K2//DUSP2//PPP2R1A//DUSP16//GNAQ//IL1A//AGPAT1//BBC3//P2RX4//SNCA//BVES//SOCS1//LRP6//AKTIP//WNT3A//KRIT1//VEGFA//RASA1//CASK/…
GO:0048523	negative regulation of cellular process	Biological process	119	2594	410	14742	1.64949	5.25868e-09	2.0375e-06	8.27912	CDC25A//CHEK1//MCM3//PSMD7//WEE1//XPC//CDC23//WAC//RFWD2//BCL6//CDKN1C//EZH1//FGFR2//HIVEP1//SMAD7//NFIB//PTH//TCF7L2//TFAP2B//TLE4//MBD2//HAND1//NCOR2//SPEN//ZFPM2//SALL4//SOX17//DUSP2//PPP2R1A//DUSP16//LRP6//KRIT1//RASA1//CASK//WNT3A//SIRT4//UBE2B//ALOX12//IKBKB//IL1A//SNCA//SON//VEGFA//FAIM3//MYO18A//PCBP4//KATNB1//DBC1//IL8//MLF1//MAP2K1//CUL2//SESN1//HTRA2//TP53INP1//PDE3B//TGFBI//WAPAL//TSP…
GO:0048522	positive regulation of cellular process	Biological process	126	2821	410	14742	1.60598	7.86901e-09	2.79481e-06	8.10408	BBC3//SNCA//BVES//AKTIP//WNT3A//VEGFA//AGPAT1//FGFR2//LRP6//FBXW7//CHEK1//APP//PPP2R1A//DEDD//PHLDA3//TP53INP1//PSMD7//PCBP4//RFWD2//GNAQ//PTH//ALOX12//IL15//ODC1//PGGT1B//TFAP2B//DNAJA2//CARM1//BAMBI//DERL2//TSPYL5//RASGRF1//ITSN1//SOS1//ARHGEF3//APH1A//PSENEN//FGD4//PPP3CC//CUL2//HTRA2//ZNF622//P2RX4//NLGN1//UBE2B//TCF7L2//IRF1//KATNB1//RHOC//UPF3A//WIBG//CCNE1//CDKN1C//IKBKB//MLL//ROR2//POU3F1…
GO:0060255	regulation of macromolecule metabolic process	Biological process	163	3998	410	14742	1.46594	1.24673e-08	4.08734e-06	7.90423	KPNA2//CCNE1//CCNT2//CDC25A//CDKN1C//CCNL2//BCL6//EZH1//FGFR2//HIVEP1//SMAD7//NFIB//PTH//TCF7L2//TFAP2B//TLE4//MBD2//HAND1//NCOR2//SPEN//ZFPM2//SALL4//SOX17//CRK//MAP3K1//MAP2K1//TAOK2//MAP3K11//PAK3//MAP3K2//DUSP2//PPP2R1A//DUSP16//SNCA//BVES//SOCS1//LRP6//AKTIP//WNT3A//FBXW7//SIRT4//CHEK1//UBE2B//RUNX1T1//ELAVL2//ESR1//FLI1//HDGF//MLL//NDN//NONO//POU3F1//PKN2//ARID4A//TARBP2//TCF3//TMPO//ZFX//R…
GO:0006464	protein modification process	Biological process	106	2267	410	14742	1.68123	1.89405e-08	5.76602e-06	7.72261	CCNE1//CCNT2//CDC25A//CDKN1C//CCNL2//CRK//MAP3K1//MAP2K1//TAOK2//MAP3K11//PAK3//MAP3K2//DUSP2//PPP2R1A//DUSP16//PSMD7//UBE2B//ARIH2//MARCH8//SIAH1//FKBP1B//SOCS1//LRP6//AKTIP//WNT3A//FBXW7//UBE2H//BRAP//CDC23//FBXL2//RNF130//RNF213//APP//ARAF//CAMK2G//IKBKB//PKN2//DYRK4//DYRK1B//LATS2//TAOK3//NLK//PBK//GNAQ//TARBP2//PPP6C//PTPN21//CTDSP1//PPM1M//SIRT4//PCMT1//LRP2//TUSC3//PMM1//FNTA//PGGT1B//CHEK…
GO:0080090	regulation of primary metabolic process	Biological process	168	4197	410	14742	1.43927	2.471e-08	7.02092e-06	7.60713	KPNA2//CCNE1//CCNT2//CDC25A//CDKN1C//CCNL2//BCL6//EZH1//FGFR2//HIVEP1//SMAD7//NFIB//PTH//TCF7L2//TFAP2B//TLE4//MBD2//HAND1//NCOR2//SPEN//ZFPM2//SALL4//SOX17//CRK//MAP3K1//MAP2K1//TAOK2//MAP3K11//PAK3//MAP3K2//DUSP2//PPP2R1A//DUSP16//SOCS1//LRP6//AKTIP//WNT3A//FBXW7//SIRT4//CHEK1//UBE2B//RUNX1T1//ELAVL2//ESR1//FLI1//HDGF//MLL//NDN//NONO//POU3F1//PKN2//ARID4A//TARBP2//TCF3//TMPO//ZFX//RDBP//JRKL//P…
GO:0065009	regulation of molecular function	Biological process	89	1823	410	14742	1.7554	5.42445e-08	1.44494e-05	7.26564	CCNE1//CCNT2//CDC25A//CDKN1C//CCNL2//CRK//MAP3K1//MAP2K1//TAOK2//MAP3K11//PAK3//MAP3K2//DUSP2//PPP2R1A//DUSP16//FBXW7//GNAQ//LRP6//TARBP2//SNCA//BBC3//HDGF//IL8//WFS1//TSPYL2//APP//PTH//PPAP2A//ZFP91//WNT7A//FGD4//FGFR2//SYTL2//CARM1//KRIT1//TCF7L2//BAMBI//AKTIP//WNT3A//VEGFA//SMAP1//BVES//BCL6//RASA1//RASGRF1//SOS1//MLL//FKBP1B//PXK//CRTC2//EPHA2//ZNF622//WAPAL//CTSA//ITSN1//APH1A//PSENEN//SOCS1…
GO:0048518	positive regulation of biological process	Biological process	132	3104	410	14742	1.52906	6.31386e-08	1.58292e-05	7.19971	AGPAT1//BBC3//SNCA//BVES//AKTIP//WNT3A//VEGFA//FGFR2//LRP6//IKBKB//MAP3K1//MAP2K1//C1QA//FBXW7//CHEK1//APP//PPP2R1A//DEDD//PHLDA3//TP53INP1//PSMD7//PCBP4//RFWD2//GNAQ//PTH//ALOX12//IL15//ODC1//PGGT1B//TFAP2B//DNAJA2//CARM1//BAMBI//DERL2//TSPYL5//RASGRF1//ITSN1//SOS1//ARHGEF3//APH1A//PSENEN//FGD4//PPP3CC//CUL2//HTRA2//ZNF622//P2RX4//IL1A//CDC42//POU3F1//SLC6A4//NLGN1//UBE2B//TCF7L2//IRF1//KATNB1//…
GO:0044260	cellular macromolecule metabolic process	Biological process	225	6231	410	14742	1.29837	1.27203e-07	3.01188e-05	6.8955	KPNA2//CDC25A//CHEK1//MCM3//NFIB//CCNE1//CCNT2//CDKN1C//CCNL2//BCL6//EZH1//FGFR2//HIVEP1//SMAD7//PTH//TCF7L2//TFAP2B//TLE4//MBD2//HAND1//NCOR2//SPEN//ZFPM2//SALL4//SOX17//PPP2R1A//UPF3A//WIBG//CRK//MAP3K1//MAP2K1//TAOK2//MAP3K11//PAK3//MAP3K2//DUSP2//DUSP16//PSMD7//UBE2B//ARIH2//MARCH8//SIAH1//LSM5//SF3B4//PCBP1//PCBP2//SYNCRIP//SKIV2L2//FKBP1B//XPC//ZFYVE26//SNCA//BVES//SOCS1//LRP6//AKTIP//WNT3A…
GO:0008219	cell death	Biological process	82	1667	410	14742	1.76869	1.52214e-07	3.25176e-05	6.81754	BBC3//BCL6//EPHA2//FGFR2//FNTA//IL1A//MLL//PPP3CC//PKN2//PSMD7//RASGRF1//RTKN//ITSN1//SIAH1//SOS1//RABEP1//TAOK2//NISCH//KIF1B//PHLDA3//ARHGEF3//APH1A//TMEM85//RNF130//PSENEN//AKTIP//TP53INP1//FGD4//ALOX12//IKBKB//SNCA//SON//TCF7L2//VEGFA//FAIM3//MYO18A//APP//PPP2R1A//DEDD//HTRA2//LAMP1//PTH//CUL2//PCBP4//ZNF622//MAP3K1//IRF1//KATNB1//ACTN1//DUSP2//ESR1//P2RX4//WFS1//KIAA1324//LRP6//KCNMA1//SMPD1…
GO:0043412	macromolecule modification	Biological process	106	2360	410	14742	1.61498	1.5609e-07	3.25176e-05	6.80663	CCNE1//CCNT2//CDC25A//CDKN1C//CCNL2//CRK//MAP3K1//MAP2K1//TAOK2//MAP3K11//PAK3//MAP3K2//DUSP2//PPP2R1A//DUSP16//PSMD7//UBE2B//ARIH2//MARCH8//SIAH1//FKBP1B//SOCS1//LRP6//AKTIP//WNT3A//FBXW7//UBE2H//BRAP//CDC23//FBXL2//RNF130//RNF213//ARAF//GGCX//PCMT1//PLAT//HERC1//TTLL4//NAGPA//APP//CAMK2G//IKBKB//PKN2//DYRK4//DYRK1B//LATS2//TAOK3//NLK//PBK//GNAQ//TARBP2//PPP6C//PTPN21//CTDSP1//PPM1M//SIRT4//LRP2…
GO:0016265	death	Biological process	82	1669	410	14742	1.76657	1.60223e-07	3.25176e-05	6.79528	BBC3//BCL6//EPHA2//FGFR2//FNTA//IL1A//MLL//PPP3CC//PKN2//PSMD7//RASGRF1//RTKN//ITSN1//SIAH1//SOS1//RABEP1//TAOK2//NISCH//KIF1B//PHLDA3//ARHGEF3//APH1A//TMEM85//RNF130//PSENEN//AKTIP//TP53INP1//FGD4//ALOX12//IKBKB//SNCA//SON//TCF7L2//VEGFA//FAIM3//MYO18A//APP//PPP2R1A//DEDD//HTRA2//LAMP1//DBC1//MAP3K11//ATXN2//SMPD1//SPTBN2//TBP//UCHL1//PNPLA6//ZFYVE26//C9ORF72//PTH//CUL2//PCBP4//ZNF622//MAP3K1//I…
GO:0044267	cellular protein metabolic process	Biological process	125	2974	410	14742	1.51127	3.3679e-07	6.33369e-05	6.47264	CCNE1//CCNT2//CDC25A//CDKN1C//CCNL2//CRK//MAP3K1//MAP2K1//TAOK2//MAP3K11//PAK3//MAP3K2//DUSP2//PPP2R1A//DUSP16//PSMD7//UBE2B//ARIH2//MARCH8//SIAH1//FKBP1B//SOCS1//LRP6//AKTIP//WNT3A//TUBA1A//DNAJA2//HSPA4L//FBXW7//UBE2H//BRAP//CDC23//FBXL2//RNF130//RNF213//EEF2//MRPS12//EIF2B5//APP//ATXN2//TARBP2//METAP1//ARAF//GGCX//PCMT1//PLAT//HERC1//TTLL4//NAGPA//CAMK2G//IKBKB//PKN2//DYRK4//DYRK1B//LATS2//TAO…
GO:0023056	positive regulation of signaling	Biological process	43	675	410	14742	2.29054	3.41799e-07	6.33369e-05	6.46623	SNCA//BVES//AGPAT1//FBXW7//PTH//VEGFA//NLGN1//KCNN4//FGFR2//MBD2//ZEB2//CDKN1C//TAOK2//TAOK3//IL15//RHOC//EDA//IKBKB//IL1A//CC2D1A//CDC42//WWC1//ZNF622//ESR1//MAP3K11//WNT7A//MAP2K1//RASGRF1//P2RX4//RELN//ITSN1//TCF7L2//TSPYL5//TNR//ST5//LRP6//ROR2//USP34//BAMBI//WNT3A//SIAH1//BBC3//HTRA2
GO:0001932	regulation of protein phosphorylation	Biological process	46	758	410	14742	2.18203	5.17165e-07	9.03099e-05	6.28637	CCNE1//CCNT2//CDC25A//CDKN1C//CCNL2//CRK//MAP3K1//MAP2K1//TAOK2//MAP3K11//PAK3//MAP3K2//DUSP2//PPP2R1A//DUSP16//LRP6//AKTIP//WNT3A//FBXW7//GNAQ//TARBP2//HDGF//IL8//WFS1//TSPYL2//APP//PPAP2A//ZFP91//WNT7A//FGD4//SMAD7//ENPP1//VEGFA//UBE2B//ARAF//CDC42//SNCA//IRF1//IL15//SOCS1//SMPD1//UCHL1//ZEB2//LATS2//RELN//VLDLR
GO:0051171	regulation of nitrogen compound metabolic process	Biological process	138	3406	410	14742	1.45682	5.29739e-07	9.03099e-05	6.27594	KPNA2//CCNE1//BCL6//CDKN1C//EZH1//FGFR2//HIVEP1//SMAD7//NFIB//PTH//TCF7L2//TFAP2B//TLE4//MBD2//HAND1//NCOR2//SPEN//ZFPM2//SALL4//SOX17//PPP2R1A//SIRT4//CHEK1//UBE2B//RUNX1T1//CCNT2//ELAVL2//ESR1//FLI1//HDGF//MLL//NDN//NONO//POU3F1//PKN2//ARID4A//TARBP2//TCF3//TMPO//ZFX//RDBP//JRKL//PHOX2B//DENND4A//YAP1//CARM1//WWC1//KCNH3//AFF4//ZNF777//ATAD2//GRHL1//NRBF2//VSX1//NLK//ARID4B//TAF7L//ING3//CC2D1A…
GO:0048699	generation of neurons	Biological process	54	964	410	14742	2.01414	6.24653e-07	0.000102395	6.20436	NDN//NTRK3//PEX13//RELN//PHOX2B//NUMBL//APP//FGFR2//PAK3//SLITRK3//WNT3A//AP2A1//RHOC//CDC42//MAP2K1//SCN1B//SCN8A//SIAH1//SOS1//SPTBN2//TNR//RANBP9//STIP1//DPYSL5//RGMA//SEMA6D//UCHL1//KATNB1//GNAQ//SS18L1//ATXN2//WNT7A//LRP6//LHX8//NFIB//EPHA2//EMX1//PSD//OMG//DIAPH1//RASGRF1//VEGFA//CDKN1C//VSX1//NLGN1//SLC6A4//GDF11//CTDSP1//TCF3//HTRA2//WEE1//SPEN//GABRB3//TCF7L2
GO:0030182	neuron differentiation	Biological process	51	890	410	14742	2.06041	6.76705e-07	0.000105843	6.1696	APP//FGFR2//PAK3//NUMBL//SLITRK3//WNT3A//AP2A1//RHOC//CDC42//MAP2K1//RELN//SCN1B//SCN8A//SIAH1//SOS1//SPTBN2//TNR//RANBP9//STIP1//DPYSL5//RGMA//SEMA6D//UCHL1//NDN//KATNB1//GNAQ//SS18L1//ATXN2//WNT7A//LHX8//NFIB//OMG//DIAPH1//RASGRF1//VEGFA//NTRK3//CDKN1C//VSX1//NLGN1//SLC6A4//PHOX2B//GDF11//CTDSP1//TCF3//HTRA2//WEE1//GABRB3//LRP6//EPHA2//EMX1//PSD
GO:0010647	positive regulation of cell communication	Biological process	42	669	410	14742	2.25733	6.95355e-07	0.000105843	6.15779	AGPAT1//FBXW7//PTH//VEGFA//NLGN1//KCNN4//FGFR2//MBD2//ZEB2//CDKN1C//TAOK2//TAOK3//IL15//RHOC//EDA//IKBKB//IL1A//CC2D1A//CDC42//WWC1//ZNF622//ESR1//MAP3K11//WNT7A//MAP2K1//RASGRF1//P2RX4//RELN//ITSN1//TCF7L2//TSPYL5//TNR//SNCA//ST5//LRP6//ROR2//USP34//BAMBI//WNT3A//SIAH1//BBC3//HTRA2
GO:0022008	neurogenesis	Biological process	56	1021	410	14742	1.97213	7.40485e-07	0.000108826	6.13048	NDN//NTRK3//PEX13//RELN//PHOX2B//NUMBL//APP//FGFR2//PAK3//SLITRK3//WNT3A//AP2A1//RHOC//CDC42//MAP2K1//SCN1B//SCN8A//SIAH1//SOS1//SPTBN2//TNR//RANBP9//STIP1//DPYSL5//RGMA//SEMA6D//UCHL1//NFIB//KATNB1//EIF2B5//GNAQ//SS18L1//ATXN2//WNT7A//LRP6//LHX8//POU3F1//EPHA2//EMX1//PSD//OMG//DIAPH1//RASGRF1//VEGFA//CDKN1C//VSX1//NLGN1//SLC6A4//GDF11//CTDSP1//TCF3//HTRA2//TCF7L2//WEE1//SPEN//GABRB3
GO:0010468	regulation of gene expression	Biological process	131	3208	410	14742	1.46828	7.9463e-07	0.000111395	6.09984	CCNE1//BCL6//CDKN1C//EZH1//FGFR2//HIVEP1//SMAD7//NFIB//PTH//TCF7L2//TFAP2B//TLE4//MBD2//HAND1//NCOR2//SPEN//ZFPM2//SALL4//SOX17//SIRT4//CHEK1//UBE2B//RUNX1T1//CCNT2//ELAVL2//ESR1//FLI1//HDGF//MLL//NDN//NONO//POU3F1//PPP2R1A//PKN2//ARID4A//TARBP2//TCF3//TMPO//ZFX//RDBP//JRKL//PHOX2B//DENND4A//YAP1//CARM1//WWC1//KCNH3//AFF4//ZNF777//ATAD2//GRHL1//NRBF2//VSX1//NLK//ARID4B//TAF7L//ING3//CC2D1A//CASZ1…
GO:0051726	regulation of cell cycle	Biological process	43	697	410	14742	2.21824	8.10242e-07	0.000111395	6.09139	CDC25A//CHEK1//MCM3//PSMD7//WEE1//XPC//CDC23//WAC//RFWD2//CCNE1//CCNT2//CDKN1C//CCNL2//PCBP4//DBC1//IL8//MLF1//MAP2K1//TCF7L2//CUL2//SESN1//HTRA2//TP53INP1//CDC42//UBE2B//USP47//TAOK2//TAOK3//FBXW7//LATS2//BCL6//TSPYL2//FGFR2//LRP6//PGGT1B//SLC6A4//TCF3//IL1A//WAPAL//APP//PKN2//USP19//SON
GO:0048468	cell development	Biological process	66	1292	410	14742	1.83677	8.63002e-07	0.000114941	6.06399	RELN//ZEB2//SOX17//ESR1//CDC42//AFF4//UBE2B//APP//FGFR2//PAK3//NUMBL//SLITRK3//WNT3A//AP2A1//RHOC//MAP2K1//SCN1B//SCN8A//SIAH1//SOS1//SPTBN2//TNR//RANBP9//STIP1//DPYSL5//RGMA//SEMA6D//UCHL1//NDN//BAMBI//SMAD7//KATNB1//EIF2B5//LRP6//WNT7A//GNAQ//SS18L1//LHX8//NFIB//POU3F1//OMG//DIAPH1//RASGRF1//BVES//VEGFA//CDKN1C//VSX1//MBNL3//NLGN1//SLC6A4//PHOX2B//GDF11//CTDSP1//TCF3//ARIH2//HTRA2//NTRK3//ATXN2…
GO:0006468	protein phosphorylation	Biological process	59	1106	410	14742	1.91809	8.99304e-07	0.000116146	6.04609	CCNE1//CCNT2//CDC25A//CDKN1C//CCNL2//CRK//MAP3K1//MAP2K1//TAOK2//MAP3K11//PAK3//MAP3K2//DUSP2//PPP2R1A//DUSP16//SOCS1//LRP6//AKTIP//WNT3A//FBXW7//GNAQ//TARBP2//CHEK1//HDGF//IL8//WFS1//TSPYL2//APP//PPAP2A//ZFP91//IKBKB//WNT7A//FGD4//SMAD7//NLK//FGFR2//RELN//WEE1//ABI2//ENPP1//VEGFA//UBE2B//ARAF//CDC42//SNCA//IRF1//IL15//SMPD1//UCHL1//ZEB2//LATS2//VLDLR//NTRK3//TAOK3//CAMK2G//PKN2//DYRK4//DYRK1B//P…
GO:0010648	negative regulation of cell communication	Biological process	37	563	410	14742	2.36301	1.134e-06	0.000138089	5.94539	DUSP2//PPP2R1A//DUSP16//WNT3A//SOX17//BRAP//SOCS6//SNX13//SNCA//IL8//SMPD1//NLK//SMAD7//BAMBI//SLC6A4//BCL6//SNX14//AP2A1//CDC42//IRF1//SOCS1//RHOC//ESR1//PDE3B//UBE2B//FBXW7//TAOK3//RASA1//ENPP1//TNR//EPHA2//PHLDA3//LRP4//ROR2//TCF7L2//LATS2//LRP6
GO:0023057	negative regulation of signaling	Biological process	37	563	410	14742	2.36301	1.134e-06	0.000138089	5.94539	DUSP2//PPP2R1A//DUSP16//WNT3A//SOX17//BRAP//SOCS6//SNX13//SNCA//IL8//SMPD1//NLK//SMAD7//BAMBI//SLC6A4//BCL6//SNX14//AP2A1//CDC42//IRF1//SOCS1//RHOC//ESR1//PDE3B//UBE2B//FBXW7//TAOK3//RASA1//ENPP1//TNR//EPHA2//PHLDA3//LRP4//ROR2//TCF7L2//LATS2//LRP6
GO:0019219	regulation of nucleobase-containing compound metabolic process	Biological process	134	3325	410	14742	1.44906	1.1732e-06	0.000138894	5.93063	KPNA2//CCNE1//BCL6//CDKN1C//EZH1//FGFR2//HIVEP1//SMAD7//NFIB//PTH//TCF7L2//TFAP2B//TLE4//MBD2//HAND1//NCOR2//SPEN//ZFPM2//SALL4//SOX17//PPP2R1A//SIRT4//CHEK1//UBE2B//RUNX1T1//CCNT2//ELAVL2//ESR1//FLI1//HDGF//MLL//NDN//NONO//POU3F1//PKN2//ARID4A//TARBP2//TCF3//TMPO//ZFX//RDBP//JRKL//PHOX2B//DENND4A//YAP1//CARM1//WWC1//KCNH3//AFF4//ZNF777//ATAD2//GRHL1//NRBF2//VSX1//NLK//ARID4B//TAF7L//ING3//CC2D1A…
GO:0045859	regulation of protein kinase activity	Biological process	38	588	410	14742	2.32369	1.21385e-06	0.000139823	5.91583	CCNE1//CCNT2//CDC25A//CDKN1C//CCNL2//CRK//MAP3K1//MAP2K1//TAOK2//MAP3K11//PAK3//MAP3K2//DUSP2//PPP2R1A//DUSP16//FBXW7//GNAQ//LRP6//TARBP2//HDGF//IL8//WFS1//TSPYL2//APP//PPAP2A//ZFP91//WNT7A//FGD4//VEGFA//SMPD1//UCHL1//ZEB2//LATS2//RELN//VLDLR//WNT3A//SNCA//CDC42
GO:0009967	positive regulation of signal transduction	Biological process	40	637	410	14742	2.25784	1.29507e-06	0.000145253	5.88771	AGPAT1//FBXW7//VEGFA//NLGN1//KCNN4//FGFR2//MBD2//ZEB2//CDKN1C//TAOK2//TAOK3//IL15//RHOC//EDA//IKBKB//IL1A//CC2D1A//CDC42//WWC1//ZNF622//ESR1//MAP3K11//WNT7A//MAP2K1//RASGRF1//P2RX4//RELN//ITSN1//TCF7L2//TSPYL5//ST5//LRP6//ROR2//USP34//BAMBI//WNT3A//SIAH1//BBC3//HTRA2//PTH
GO:0042325	regulation of phosphorylation	Biological process	47	811	410	14742	2.08377	1.4155e-06	0.000154689	5.84909	CCNE1//CCNT2//CDC25A//CDKN1C//CCNL2//CRK//MAP3K1//MAP2K1//TAOK2//MAP3K11//PAK3//MAP3K2//DUSP2//PPP2R1A//DUSP16//SOCS1//LRP6//AKTIP//WNT3A//FBXW7//GNAQ//TARBP2//HDGF//IL8//WFS1//TSPYL2//APP//PPAP2A//ZFP91//WNT7A//FGD4//SMAD7//ENPP1//VEGFA//UBE2B//ARAF//CDC42//SNCA//ZNF622//IRF1//IL15//SMPD1//UCHL1//ZEB2//LATS2//RELN//VLDLR
GO:0043549	regulation of kinase activity	Biological process	39	617	410	14742	2.27275	1.50761e-06	0.000160636	5.82171	CCNE1//CCNT2//CDC25A//CDKN1C//CCNL2//CRK//MAP3K1//MAP2K1//TAOK2//MAP3K11//PAK3//MAP3K2//DUSP2//PPP2R1A//DUSP16//FBXW7//GNAQ//LRP6//TARBP2//HDGF//IL8//WFS1//TSPYL2//APP//PPAP2A//ZFP91//WNT7A//FGD4//VEGFA//ZNF622//SMPD1//UCHL1//ZEB2//CDC42//LATS2//RELN//VLDLR//WNT3A//SNCA
GO:0035556	intracellular signal transduction	Biological process	85	1855	410	14742	1.64758	1.74893e-06	0.000181804	5.75723	MAP3K1//PAK3//MAP2K1//BRAP//TAOK3//NLK//PSMD7//PCBP4//RFWD2//GNAQ//PTH//IL8//MCTP2//LATS2//IKBKB//IRF1//ZFP91//CRKL//MAP3K11//ROR2//WNT7A//MAP3K2//FGD4//SOCS1//SOCS6//DDAH1//RHOC//KRIT1//CDC42//OCRL//RAB5C//RALGDS//RASGRF1//ITSN1//SOS1//BCAR3//YWHAQ//ARHGEF3//LRRK1//RTKN//VEGFA//NLGN1//FKBP1B//NISCH//PPP2R1A//PSD//PSD3//TAOK2//CRK//FGD5//BCL6//YAP1//WWC1//EDA//IL15//PHLDA3//BBC3//IL1A//CC2D1A//ES…
GO:0050790	regulation of catalytic activity	Biological process	71	1468	410	14742	1.73902	2.312e-06	0.000234612	5.63601	CCNE1//CCNT2//CDC25A//CDKN1C//CCNL2//CRK//MAP3K1//MAP2K1//TAOK2//MAP3K11//PAK3//MAP3K2//DUSP2//PPP2R1A//DUSP16//FBXW7//GNAQ//LRP6//TARBP2//SNCA//BBC3//HDGF//IL8//WFS1//TSPYL2//APP//PTH//PPAP2A//ZFP91//WNT7A//FGD4//FGFR2//SYTL2//VEGFA//SMAP1//BVES//BCL6//RASA1//RASGRF1//SOS1//FKBP1B//PXK//EPHA2//ZNF622//CTSA//ITSN1//APH1A//PSENEN//SOCS1//ANGPTL4//FGD5//TFAP2B//USP47//ALOX12//RHOC//HTRA2//WNT3A//SM…
GO:0051252	regulation of RNA metabolic process	Biological process	119	2899	410	14742	1.47595	2.57158e-06	0.000247947	5.5898	CCNE1//BCL6//CDKN1C//EZH1//FGFR2//HIVEP1//SMAD7//NFIB//PTH//TCF7L2//TFAP2B//TLE4//MBD2//HAND1//NCOR2//SPEN//ZFPM2//SALL4//SOX17//SIRT4//CHEK1//UBE2B//RUNX1T1//CCNT2//ELAVL2//ESR1//FLI1//HDGF//MLL//NDN//NONO//POU3F1//PPP2R1A//PKN2//ARID4A//TARBP2//TCF3//TMPO//ZFX//RDBP//JRKL//PHOX2B//DENND4A//YAP1//CARM1//WWC1//KCNH3//AFF4//ZNF777//ATAD2//GRHL1//NRBF2//VSX1//NLK//ARID4B//TAF7L//ING3//CC2D1A//CASZ1…
GO:0043170	macromolecule metabolic process	Biological process	237	6871	410	14742	1.24023	2.61656e-06	0.000247947	5.58227	KPNA2//CDC25A//CHEK1//MCM3//NFIB//CCNE1//CCNT2//CDKN1C//CCNL2//BCL6//EZH1//FGFR2//HIVEP1//SMAD7//PTH//TCF7L2//TFAP2B//TLE4//MBD2//HAND1//NCOR2//SPEN//ZFPM2//SALL4//SOX17//PPP2R1A//UPF3A//WIBG//CRK//MAP3K1//MAP2K1//TAOK2//MAP3K11//PAK3//MAP3K2//DUSP2//DUSP16//PSMD7//UBE2B//ARIH2//MARCH8//SIAH1//LSM5//SF3B4//PCBP1//PCBP2//SYNCRIP//SKIV2L2//FKBP1B//XPC//ZFYVE26//SNCA//BVES//SOCS1//LRP6//AKTIP//WNT3A…
GO:0031399	regulation of protein modification process	Biological process	51	932	410	14742	1.96755	2.61793e-06	0.000247947	5.58204	CCNE1//CCNT2//CDC25A//CDKN1C//CCNL2//CRK//MAP3K1//MAP2K1//TAOK2//MAP3K11//PAK3//MAP3K2//DUSP2//PPP2R1A//DUSP16//SOCS1//LRP6//AKTIP//WNT3A//FBXW7//GNAQ//TARBP2//HDGF//IL8//WFS1//TSPYL2//APP//PPAP2A//ZFP91//WNT7A//FGD4//SMAD7//UBE2B//TSPYL5//ENPP1//VEGFA//ARAF//CDC42//SNCA//SMPD1//IRF1//IL15//UCHL1//ZEB2//LATS2//RELN//VLDLR//PSMD7//CDC23//FNTA//CHEK1
GO:0010941	regulation of cell death	Biological process	61	1200	410	14742	1.82777	2.81325e-06	0.000260654	5.55079	BBC3//BCL6//ALOX12//IKBKB//IL1A//SNCA//SON//TCF7L2//VEGFA//FAIM3//MYO18A//APP//PPP2R1A//DEDD//PHLDA3//TP53INP1//RASGRF1//ITSN1//SOS1//ARHGEF3//APH1A//PSENEN//FGD4//PTH//PPP3CC//CUL2//HTRA2//PCBP4//ZNF622//IRF1//KATNB1//ACTN1//DUSP2//ESR1//P2RX4//PSMD7//WFS1//KIAA1324//LRP6//FGFR2//KCNMA1//MAP3K1//SIAH1//SMPD1//ING3//ARAF//TFAP2B//UBE2B//WNT7A//ANGPTL4//USP47//RASA1//RHOC//MAP3K11//GABRB3//RTKN//S…
GO:0051338	regulation of transferase activity	Biological process	39	634	410	14742	2.21181	2.91576e-06	0.000264404	5.53525	CCNE1//CCNT2//CDC25A//CDKN1C//CCNL2//CRK//MAP3K1//MAP2K1//TAOK2//MAP3K11//PAK3//MAP3K2//DUSP2//PPP2R1A//DUSP16//FBXW7//GNAQ//LRP6//TARBP2//HDGF//IL8//WFS1//TSPYL2//APP//PPAP2A//ZFP91//WNT7A//FGD4//VEGFA//ZNF622//SMPD1//UCHL1//ZEB2//CDC42//LATS2//RELN//VLDLR//WNT3A//SNCA
GO:0010627	regulation of intracellular protein kinase cascade	Biological process	34	518	410	14742	2.36005	3.22904e-06	0.000286712	5.49093	DUSP2//PPP2R1A//DUSP16//MAP3K11//WNT7A//MAP3K2//FGD4//VEGFA//NLGN1//MAP2K1//TAOK2//TAOK3//NLK//IRF1//IL15//SOCS1//RHOC//EDA//IKBKB//IL1A//CC2D1A//ESR1//CDC42//FGFR2//WWC1//ZNF622//ZEB2//ITSN1//TCF7L2//TSPYL5//EPHA2//PHLDA3//ST5//FBXW7
GO:0048585	negative regulation of response to stimulus	Biological process	39	640	410	14742	2.19107	3.65347e-06	0.00030539	5.43729	DUSP2//PPP2R1A//DUSP16//BCL6//SOX17//BRAP//SOCS6//SNX13//SNCA//IL8//SMPD1//NLK//SMAD7//BAMBI//SNX14//AP2A1//CDC42//IRF1//SOCS1//RHOC//ESR1//PDE3B//UBE2B//FBXW7//TAOK3//RASA1//ENPP1//TNR//WNT3A//PCBP2//TARBP2//EPHA2//PHLDA3//CASK//LRP4//ROR2//TCF7L2//LATS2//LRP6
GO:0019220	regulation of phosphate metabolic process	Biological process	49	891	410	14742	1.97738	3.65436e-06	0.00030539	5.43719	CCNE1//CCNT2//CDC25A//CDKN1C//CCNL2//CRK//MAP3K1//MAP2K1//TAOK2//MAP3K11//PAK3//MAP3K2//DUSP2//PPP2R1A//DUSP16//SOCS1//LRP6//AKTIP//WNT3A//FBXW7//GNAQ//TARBP2//HDGF//IL8//WFS1//TSPYL2//APP//PPAP2A//ZFP91//WNT7A//FGD4//SMAD7//SYTL2//ENPP1//VEGFA//FKBP1B//UBE2B//ARAF//CDC42//SNCA//ZNF622//SMPD1//IRF1//IL15//UCHL1//ZEB2//LATS2//RELN//VLDLR
GO:0051174	regulation of phosphorus metabolic process	Biological process	49	891	410	14742	1.97738	3.65436e-06	0.00030539	5.43719	CCNE1//CCNT2//CDC25A//CDKN1C//CCNL2//CRK//MAP3K1//MAP2K1//TAOK2//MAP3K11//PAK3//MAP3K2//DUSP2//PPP2R1A//DUSP16//SOCS1//LRP6//AKTIP//WNT3A//FBXW7//GNAQ//TARBP2//HDGF//IL8//WFS1//TSPYL2//APP//PPAP2A//ZFP91//WNT7A//FGD4//SMAD7//SYTL2//ENPP1//VEGFA//FKBP1B//UBE2B//ARAF//CDC42//SNCA//ZNF622//SMPD1//IRF1//IL15//UCHL1//ZEB2//LATS2//RELN//VLDLR
GO:0009968	negative regulation of signal transduction	Biological process	34	523	410	14742	2.33749	3.98188e-06	0.000326361	5.39991	DUSP2//PPP2R1A//DUSP16//SOX17//SNCA//IL8//SMPD1//NLK//SMAD7//BAMBI//BCL6//SNX13//SNX14//AP2A1//CDC42//IRF1//SOCS1//RHOC//ESR1//PDE3B//UBE2B//FBXW7//TAOK3//RASA1//ENPP1//EPHA2//PHLDA3//LRP4//ROR2//TCF7L2//LATS2//LRP6//BRAP//SOCS6
GO:0048666	neuron development	Biological process	42	721	410	14742	2.09453	4.71816e-06	0.000379412	5.32623	APP//FGFR2//PAK3//NUMBL//SLITRK3//WNT3A//AP2A1//RHOC//CDC42//MAP2K1//RELN//SCN1B//SCN8A//SIAH1//SOS1//SPTBN2//TNR//RANBP9//STIP1//DPYSL5//RGMA//SEMA6D//UCHL1//NDN//KATNB1//GNAQ//SS18L1//LHX8//NFIB//OMG//WNT7A//DIAPH1//RASGRF1//VEGFA//CDKN1C//VSX1//NTRK3//ATXN2//WEE1//GABRB3//NLGN1//HTRA2
GO:2000112	regulation of cellular macromolecule biosynthetic process	Biological process	122	3039	410	14742	1.44345	5.65771e-06	0.00044654	5.24736	CCNE1//BCL6//CDKN1C//EZH1//FGFR2//HIVEP1//SMAD7//NFIB//PTH//TCF7L2//TFAP2B//TLE4//MBD2//HAND1//NCOR2//SPEN//ZFPM2//SALL4//SOX17//PPP2R1A//SIRT4//CHEK1//UBE2B//RUNX1T1//CCNT2//ELAVL2//ESR1//FLI1//HDGF//MLL//NDN//NONO//POU3F1//PKN2//ARID4A//TARBP2//TCF3//TMPO//ZFX//RDBP//JRKL//PHOX2B//DENND4A//YAP1//CARM1//WWC1//KCNH3//AFF4//ZNF777//ATAD2//GRHL1//NRBF2//VSX1//NLK//ARID4B//TAF7L//ING3//CC2D1A//CASZ1…
GO:0030177	positive regulation of Wnt receptor signaling pathway	Biological process	10	61	410	14742	5.89444	6.30033e-06	0.000488218	5.20064	EDA//FGFR2//LRP6//ROR2//WNT7A//USP34//BAMBI//WNT3A//MBD2//ZEB2
GO:0032268	regulation of cellular protein metabolic process	Biological process	58	1150	410	14742	1.81344	6.50382e-06	0.000494987	5.18683	CCNE1//CCNT2//CDC25A//CDKN1C//CCNL2//CRK//MAP3K1//MAP2K1//TAOK2//MAP3K11//PAK3//MAP3K2//DUSP2//PPP2R1A//DUSP16//SOCS1//LRP6//AKTIP//WNT3A//FBXW7//APP//ATXN2//TARBP2//EIF2B5//METAP1//GNAQ//HDGF//IL8//WFS1//TSPYL2//PPAP2A//ZFP91//WNT7A//FGD4//SMAD7//RHOC//UPF3A//WIBG//UBE2B//TSPYL5//ENPP1//VEGFA//ARAF//CDC42//SNCA//SMPD1//IRF1//IL15//UCHL1//ZEB2//LATS2//RELN//VLDLR//PLAT//PSMD7//CDC23//FNTA//CHEK1
GO:0022603	regulation of anatomical structure morphogenesis	Biological process	33	512	410	14742	2.31748	6.64623e-06	0.000496951	5.17742	WNT3A//CARM1//DIAPH1//RASA1//VEGFA//TAOK2//BVES//BAMBI//FBLIM1//FGD4//FGD5//SMAD7//BAI3//KRIT1//TIE1//WNT7A//SOX17//TCF7L2//EPHA2//EGLN1//IL1A//DDAH1//ANGPTL4//OMG//NTRK3//TNR//NUMBL//ROR2//FGFR2//ESR1//LRP6//FBXW7//NFIB
GO:0010556	regulation of macromolecule biosynthetic process	Biological process	123	3099	410	14742	1.42711	9.01462e-06	0.000662419	5.04505	CCNE1//BCL6//CDKN1C//EZH1//FGFR2//HIVEP1//SMAD7//NFIB//PTH//TCF7L2//TFAP2B//TLE4//MBD2//HAND1//NCOR2//SPEN//ZFPM2//SALL4//SOX17//PPP2R1A//SIRT4//CHEK1//UBE2B//RUNX1T1//CCNT2//ELAVL2//ESR1//FLI1//HDGF//MLL//NDN//NONO//POU3F1//PKN2//ARID4A//TARBP2//TCF3//TMPO//ZFX//RDBP//JRKL//PHOX2B//DENND4A//YAP1//CARM1//WWC1//KCNH3//AFF4//ZNF777//ATAD2//GRHL1//NRBF2//VSX1//NLK//ARID4B//TAF7L//ING3//CC2D1A//CASZ1…
GO:0030111	regulation of Wnt receptor signaling pathway	Biological process	16	160	410	14742	3.59561	1.0012e-05	0.000723243	4.99948	SOX17//FGFR2//MBD2//ZEB2//NLK//LRP4//ROR2//TCF7L2//LATS2//EDA//LRP6//WNT7A//USP34//BAMBI//WNT3A//PPP2R1A
GO:0016310	phosphorylation	Biological process	61	1256	410	14742	1.74628	1.1827e-05	0.000840111	4.92713	CCNE1//CCNT2//CDC25A//CDKN1C//CCNL2//CRK//MAP3K1//MAP2K1//TAOK2//MAP3K11//PAK3//MAP3K2//DUSP2//PPP2R1A//DUSP16//SOCS1//LRP6//AKTIP//WNT3A//FBXW7//APP//ARAF//CAMK2G//IKBKB//PKN2//DYRK4//DYRK1B//LATS2//TAOK3//NLK//PBK//GNAQ//TARBP2//CHEK1//HDGF//IL8//WFS1//TSPYL2//PPAP2A//ZFP91//WNT7A//FGD4//SMAD7//FGFR2//RELN//WEE1//ABI2//ENPP1//VEGFA//UBE2B//CDC42//SNCA//ZNF622//IRF1//IL15//SMPD1//UCHL1//ZEB2//VL…
GO:0050793	regulation of developmental process	Biological process	60	1235	410	14742	1.74685	1.39514e-05	0.000964322	4.85538	WNT3A//SOX17//CARM1//DIAPH1//RASA1//VEGFA//TAOK2//BVES//BAMBI//FBLIM1//FGD4//FGD5//FGFR2//SMAD7//KATNB1//TNR//WNT7A//BAI3//KRIT1//TIE1//SLC6A4//ENPP1//PTH//IL15//BCL6//TCF7L2//PPP2R1A//TFAP2B//CCNE1//MAP2K1//LRP6//ZFPM2//ALOX12//GNAQ//SMAP1//MBNL3//NLGN1//APP//RHOC//PHOX2B//GDF11//CTDSP1//TCF3//ESRRA//EPHA2//EGLN1//IL1A//DDAH1//ANGPTL4//LAMA3//USP19//OMG//NTRK3//NUMBL//SPEN//CDC42//ROR2//ESR1//FB…
GO:0048731	system development	Biological process	122	3095	410	14742	1.41733	1.40281e-05	0.000964322	4.853	EPHA2//GNAQ//ROR2//PTH//WNT7A//GDF11//FGFR2//IL8//TGFBI//VEGFA//SH2D2A//HAND1//SOX17//EIF2B5//CCNE1//ESR1//CRKL//TCF7L2//NFATC3//RASA1//ZFPM2//SLC5A1//APH1A//ZEB2//NDN//NTRK3//PEX13//RELN//PHOX2B//TCF3//KCNJ8//LRP4//ODC1//TFAP2B//WFS1//AQP11//LRP6//SALL4//STOX2//FBXW7//WNT3A//NFIB//MLF1//CDC42//CARM1//FLI1//CAMK2G//SCN8A//SIAH1//SMPD1//VLDLR//NUMBL//GDA//NLGN1//SEMA5B//DPYSL5//SEMA6D//APP//PAK3//…
GO:0010467	gene expression	Biological process	153	4101	410	14742	1.34145	1.43351e-05	0.000969778	4.8436	CCNE1//BCL6//CDKN1C//EZH1//FGFR2//HIVEP1//SMAD7//NFIB//PTH//TCF7L2//TFAP2B//TLE4//MBD2//HAND1//NCOR2//SPEN//ZFPM2//SALL4//SOX17//SF3B4//PCBP1//PCBP2//SYNCRIP//SKIV2L2//CCNT2//IRF1//MLL//NFATC3//ARID4A//TBP//RDBP//COPS2//TRIP11//AFF4//TH1L//POLR3G//SIRT4//CHEK1//ESR1//MLF1//TCF3//MYNN//RSF1//RUNX1T1//ELAVL2//FLI1//HDGF//NDN//NONO//POU3F1//PPP2R1A//PKN2//TARBP2//TMPO//ZFX//JRKL//PHOX2B//DENND4A//YA…
GO:0012501	programmed cell death	Biological process	70	1521	410	14742	1.65478	1.51963e-05	0.00100246	4.81826	BBC3//BCL6//EPHA2//FGFR2//FNTA//IL1A//MLL//PPP3CC//PKN2//PSMD7//RASGRF1//RTKN//ITSN1//SIAH1//SOS1//RABEP1//TAOK2//NISCH//KIF1B//PHLDA3//ARHGEF3//APH1A//TMEM85//RNF130//PSENEN//AKTIP//TP53INP1//FGD4//ALOX12//IKBKB//SNCA//SON//TCF7L2//VEGFA//FAIM3//MYO18A//APP//PPP2R1A//DEDD//HTRA2//LAMP1//PTH//CUL2//PCBP4//ZNF622//MAP3K1//ACTN1//DUSP2//ESR1//P2RX4//WFS1//KIAA1324//LRP6//KCNMA1//SMPD1//ING3//ARAF//…
GO:0051239	regulation of multicellular organismal process	Biological process	71	1550	410	14742	1.64702	1.52886e-05	0.00100246	4.81563	AGPAT1//SNCA//CACNA1E//NLGN1//TSHZ3//MAP2K1//WNT3A//SOX17//CARM1//CNN1//FKBP1B//IL1A//P2RX4//BAMBI//SMAD7//KATNB1//TNR//CAMK2G//BAI3//KRIT1//TIE1//SLC6A4//LRP6//LRP4//ENPP1//PTH//WNT7A//NISCH//USP46//PCBP2//NLRX1//POLR3G//IL15//BCL6//APP//FGFR2//ATRN//HTRA2//ATXN2//PLAT//TCF7L2//IRF1//ALOX12//SMAP1//MBNL3//RHOC//PHOX2B//GDF11//CTDSP1//TCF3//ESRRA//EPHA2//EGLN1//VEGFA//DDAH1//ANGPTL4//LAMA3//SNCG/…
GO:0009653	anatomical structure morphogenesis	Biological process	81	1847	410	14742	1.57685	1.70774e-05	0.00109082	4.76758	BCL6//RELN//ROR2//FGFR2//IL8//TGFBI//VEGFA//SH2D2A//HAND1//SOX17//NFATC3//EPHA2//RASA1//ZFPM2//LRP6//DUSP2//ZEB2//WNT3A//SALL4//CARM1//UBE2B//CRKL//FLI1//GDF11//APP//PAK3//NUMBL//SLITRK3//AP2A1//RHOC//CDC42//MAP2K1//SCN1B//SCN8A//SIAH1//SOS1//SPTBN2//TNR//RANBP9//STIP1//DPYSL5//RGMA//SEMA6D//UCHL1//NDN//DYRK1B//DIAPH1//TAOK2//BVES//BAMBI//FBLIM1//FGD4//FGD5//SMAD7//TFAP2B//WNT7A//BAI3//KRIT1//TIE…
GO:0009987	cellular process	Biological process	378	12597	410	14742	1.07894	1.72884e-05	0.00109082	4.76224	KPNA2//TRIP11//DDAH1//BCL6//CDC25A//CHEK1//MCM3//NFIB//PPP2R1A//SON//PSMD7//WEE1//XPC//CDC23//WAC//RFWD2//CCNE1//CCNT2//CDKN1C//CCNL2//MAP3K11//TCF3//PPP6C//CUL2//LATS2//APP//TUBA1A//CEP164//RCC2//AHCY//EZH1//FGFR2//HIVEP1//SMAD7//PTH//TCF7L2//TFAP2B//TLE4//MBD2//HAND1//NCOR2//SPEN//ZFPM2//SALL4//SOX17//MAP3K1//PAK3//MAP2K1//BRAP//TAOK3//NLK//UPF3A//WIBG//CRK//TAOK2//MAP3K2//DUSP2//DUSP16//UBE2B/…
GO:0042981	regulation of apoptotic process	Biological process	57	1161	410	14742	1.76529	1.7404e-05	0.00109082	4.75935	BBC3//BCL6//ALOX12//IKBKB//IL1A//SNCA//SON//TCF7L2//VEGFA//FAIM3//MYO18A//APP//PPP2R1A//DEDD//PHLDA3//TP53INP1//RASGRF1//ITSN1//SOS1//ARHGEF3//APH1A//PSENEN//FGD4//PTH//PPP3CC//CUL2//HTRA2//PCBP4//ZNF622//LRP6//FGFR2//KCNMA1//MAP3K1//SIAH1//SMPD1//ING3//ARAF//TFAP2B//UBE2B//WFS1//WNT7A//ANGPTL4//USP47//RASA1//RHOC//MAP3K11//ESR1//GABRB3//RTKN//SERBP1//SMAD7//KRIT1//ACTN1//DUSP2//P2RX4//PSMD7//KIA…
GO:0023052	signaling	Biological process	161	4383	410	14742	1.32077	1.79763e-05	0.00111036	4.7453	MAP3K1//PAK3//MAP2K1//BRAP//TAOK3//NLK//MAP3K11//MAP3K2//DUSP2//PPP2R1A//DUSP16//SNCA//BVES//AGPAT1//IKBKB//WNT3A//SOX17//CCNE1//LRP6//TCF7L2//TLE4//USP34//ROR2//RHOC//EDA//ESR1//GABRB3//HDGF//IL8//IL15//MFAP4//OCRL//P2RX4//PDE3B//PKN2//PSD//RALGDS//RASA1//RASGRF1//RTKN//SMPD1//SOS1//TIE1//TNR//VEGFA//VLDLR//WNT7A//ZYX//BCAR3//SH2D2A//COPS2//RASSF2//IPO7//ANGPTL4//CC2D1A//DPYSL5//ODZ2//ARRDC3//NT…
GO:0009889	regulation of biosynthetic process	Biological process	128	3307	410	14742	1.39171	1.92586e-05	0.00115966	4.71537	CCNE1//BCL6//CDKN1C//EZH1//FGFR2//HIVEP1//SMAD7//NFIB//PTH//TCF7L2//TFAP2B//TLE4//MBD2//HAND1//NCOR2//SPEN//ZFPM2//SALL4//SOX17//PPP2R1A//SIRT4//CHEK1//UBE2B//RUNX1T1//CCNT2//ELAVL2//ESR1//FLI1//HDGF//MLL//NDN//NONO//POU3F1//PKN2//ARID4A//TARBP2//TCF3//TMPO//ZFX//RDBP//JRKL//PHOX2B//DENND4A//YAP1//CARM1//WWC1//KCNH3//AFF4//ZNF777//ATAD2//GRHL1//NRBF2//VSX1//NLK//ARID4B//TAF7L//ING3//CC2D1A//CASZ1…
GO:2001141	regulation of RNA biosynthetic process	Biological process	113	2832	410	14742	1.43469	1.96611e-05	0.00115966	4.70639	CCNE1//BCL6//CDKN1C//EZH1//FGFR2//HIVEP1//SMAD7//NFIB//PTH//TCF7L2//TFAP2B//TLE4//MBD2//HAND1//NCOR2//SPEN//ZFPM2//SALL4//SOX17//SIRT4//CHEK1//UBE2B//RUNX1T1//CCNT2//ELAVL2//ESR1//FLI1//HDGF//MLL//NDN//NONO//POU3F1//PPP2R1A//PKN2//ARID4A//TARBP2//TCF3//TMPO//ZFX//RDBP//JRKL//PHOX2B//DENND4A//YAP1//CARM1//WWC1//KCNH3//AFF4//ZNF777//ATAD2//GRHL1//NRBF2//VSX1//NLK//ARID4B//TAF7L//ING3//CC2D1A//CASZ1…
GO:0007154	cell communication	Biological process	164	4490	410	14742	1.31332	1.96736e-05	0.00115966	4.70612	MAP3K1//PAK3//MAP2K1//BRAP//TAOK3//NLK//MAP3K11//MAP3K2//DUSP2//PPP2R1A//DUSP16//SNCA//AGPAT1//IKBKB//WNT3A//SOX17//CCNE1//LRP6//TCF7L2//TLE4//USP34//ROR2//RHOC//EDA//ESR1//GABRB3//HDGF//IL8//IL15//MFAP4//OCRL//P2RX4//PDE3B//PKN2//PSD//RALGDS//RASA1//RASGRF1//RTKN//SMPD1//SOS1//TIE1//TNR//VEGFA//VLDLR//WNT7A//ZYX//BCAR3//SH2D2A//COPS2//RASSF2//IPO7//ANGPTL4//CC2D1A//DPYSL5//ODZ2//ARRDC3//NTRK3//A…
GO:0000902	cell morphogenesis	Biological process	45	843	410	14742	1.91936	1.98628e-05	0.00115966	4.70196	RELN//SOX17//APP//FGFR2//PAK3//NUMBL//SLITRK3//WNT3A//AP2A1//RHOC//CDC42//MAP2K1//SCN1B//SCN8A//SIAH1//SOS1//SPTBN2//TNR//RANBP9//STIP1//DPYSL5//RGMA//SEMA6D//UCHL1//NDN//DIAPH1//RASA1//VEGFA//TAOK2//BVES//BAMBI//FBLIM1//FGD4//FGD5//SMAD7//LRP6//NFIB//OMG//WNT7A//NTRK3//ATXN2//WEE1//EPHA2//BCL6
GO:0031326	regulation of cellular biosynthetic process	Biological process	127	3279	410	14742	1.39263	2.04818e-05	0.00117964	4.68863	CCNE1//BCL6//CDKN1C//EZH1//FGFR2//HIVEP1//SMAD7//NFIB//PTH//TCF7L2//TFAP2B//TLE4//MBD2//HAND1//NCOR2//SPEN//ZFPM2//SALL4//SOX17//PPP2R1A//SIRT4//CHEK1//UBE2B//RUNX1T1//CCNT2//ELAVL2//ESR1//FLI1//HDGF//MLL//NDN//NONO//POU3F1//PKN2//ARID4A//TARBP2//TCF3//TMPO//ZFX//RDBP//JRKL//PHOX2B//DENND4A//YAP1//CARM1//WWC1//KCNH3//AFF4//ZNF777//ATAD2//GRHL1//NRBF2//VSX1//NLK//ARID4B//TAF7L//ING3//CC2D1A//CASZ1…
GO:0043067	regulation of programmed cell death	Biological process	57	1170	410	14742	1.75171	2.17409e-05	0.00122503	4.66272	BBC3//BCL6//ALOX12//IKBKB//IL1A//SNCA//SON//TCF7L2//VEGFA//FAIM3//MYO18A//APP//PPP2R1A//DEDD//PHLDA3//TP53INP1//RASGRF1//ITSN1//SOS1//ARHGEF3//APH1A//PSENEN//FGD4//PTH//PPP3CC//CUL2//HTRA2//PCBP4//ZNF622//ACTN1//DUSP2//ESR1//P2RX4//PSMD7//WFS1//KIAA1324//LRP6//FGFR2//KCNMA1//MAP3K1//SIAH1//SMPD1//ING3//ARAF//TFAP2B//UBE2B//WNT7A//ANGPTL4//USP47//RASA1//RHOC//MAP3K11//GABRB3//RTKN//SERBP1//SMAD7//…
GO:0006915	apoptotic process	Biological process	69	1509	410	14742	1.64412	2.18447e-05	0.00122503	4.66065	BBC3//BCL6//ALOX12//IKBKB//IL1A//SNCA//SON//TCF7L2//VEGFA//FAIM3//MYO18A//APP//PPP2R1A//DEDD//PHLDA3//TP53INP1//FNTA//HTRA2//RASGRF1//ITSN1//SOS1//ARHGEF3//APH1A//PSENEN//FGD4//PTH//PPP3CC//CUL2//PCBP4//ZNF622//MAP3K1//ACTN1//DUSP2//ESR1//P2RX4//PSMD7//WFS1//KIAA1324//LRP6//KCNMA1//SIAH1//SMPD1//ING3//ARAF//TFAP2B//UBE2B//WNT7A//ANGPTL4//USP47//RHOC//WNT3A//RASA1//MAP3K11//GABRB3//KRIT1//EPHA2//F…
GO:0007243	intracellular protein kinase cascade	Biological process	41	743	410	14742	1.98412	2.22568e-05	0.00123193	4.65254	MAP3K1//PAK3//MAP2K1//BRAP//TAOK3//NLK//IKBKB//IRF1//CRKL//MAP3K11//ROR2//WNT7A//MAP3K2//FGD4//SOCS1//SOCS6//VEGFA//NLGN1//RHOC//TAOK2//EDA//IL15//PPP2R1A//IL1A//CC2D1A//ESR1//CDC42//FGFR2//WWC1//ZNF622//EPHA2//ZEB2//ITSN1//TCF7L2//TSPYL5//PHLDA3//ST5//FBXW7//LATS2
GO:0031325	positive regulation of cellular metabolic process	Biological process	70	1540	410	14742	1.63437	2.28936e-05	0.00125093	4.64029	SNCA//BVES//AKTIP//WNT3A//CHEK1//GNAQ//PTH//UBE2B//TCF7L2//RHOC//UPF3A//WIBG//CCNE1//CDKN1C//IKBKB//LRP6//MLL//ROR2//POU3F1//TBP//TCF3//TFAM//TFAP2B//WNT7A//TAF15//DYRK1B//MAP3K2//SPEN//BAMBI//SS18L1//WAC//RSF1//SOX17//HMBOX1//TFAP2D//SETD3//SMAD7//WFS1//TSPYL5//VEGFA//MAP2K1//ARAF//CDC42//SMPD1//IL15//IRF1//IL1A//ESR1//P2RX4//DDAH1//APP//ESRRA//FGFR2//NFATC3//NFIB//PHOX2B//HAND1//ZFPM2//SALL4//E…
GO:0044238	primary metabolic process	Biological process	273	8366	410	14742	1.17332	2.3234e-05	0.00125346	4.63388	KPNA2//DDAH1//CDC25A//CHEK1//MCM3//NFIB//CCNE1//CCNT2//CDKN1C//CCNL2//AHCY//BCL6//EZH1//FGFR2//HIVEP1//SMAD7//PTH//TCF7L2//TFAP2B//TLE4//MBD2//HAND1//NCOR2//SPEN//ZFPM2//SALL4//SOX17//PPP2R1A//UPF3A//WIBG//CRK//MAP3K1//MAP2K1//TAOK2//MAP3K11//PAK3//MAP3K2//DUSP2//DUSP16//PSMD7//UBE2B//ARIH2//MARCH8//SIAH1//LSM5//SF3B4//PCBP1//PCBP2//SYNCRIP//SKIV2L2//FKBP1B//XPC//ZFYVE26//PEX13//SOCS1//LRP6//AKTI…
GO:0006355	regulation of transcription, DNA-dependent	Biological process	112	2815	410	14742	1.43058	2.47754e-05	0.00131991	4.60598	CCNE1//BCL6//CDKN1C//EZH1//FGFR2//HIVEP1//SMAD7//NFIB//PTH//TCF7L2//TFAP2B//TLE4//MBD2//HAND1//NCOR2//SPEN//ZFPM2//SALL4//SOX17//SIRT4//CHEK1//UBE2B//TFAM//CRK//MYCN//NFATC3//TARBP2//CTDSP1//ZNF367//POLR3G//IKBKB//LRP6//MLL//ROR2//POU3F1//TBP//TCF3//WNT7A//TAF15//DYRK1B//MAP3K2//BAMBI//SS18L1//WAC//RSF1//HMBOX1//TFAP2D//SETD3//WNT3A//ARID4A//DEDD//YWHAQ//TH1L//USP47//TSHZ3//KCTD1//VEGFA//CRTC2//M…
GO:0010604	positive regulation of macromolecule metabolic process	Biological process	67	1458	410	14742	1.6523	2.50959e-05	0.00132048	4.6004	SNCA//BVES//AKTIP//WNT3A//CHEK1//ALOX12//CDC42//POU3F1//SLC6A4//UBE2B//TCF7L2//RHOC//UPF3A//WIBG//CCNE1//CDKN1C//IKBKB//LRP6//MLL//ROR2//TBP//TCF3//TFAM//TFAP2B//WNT7A//TAF15//DYRK1B//MAP3K2//SPEN//BAMBI//SS18L1//WAC//RSF1//SOX17//HMBOX1//TFAP2D//SETD3//SMAD7//WFS1//TSPYL5//VEGFA//MAP2K1//ARAF//SMPD1//IL15//IRF1//IL1A//PTH//ESR1//APP//ESRRA//FGFR2//NFATC3//NFIB//PHOX2B//HAND1//ZFPM2//SALL4//EIF2B…
GO:0019538	protein metabolic process	Biological process	135	3554	410	14742	1.36581	2.62882e-05	0.00136634	4.58024	CCNE1//CCNT2//CDC25A//CDKN1C//CCNL2//CRK//MAP3K1//MAP2K1//TAOK2//MAP3K11//PAK3//MAP3K2//DUSP2//PPP2R1A//DUSP16//PSMD7//UBE2B//ARIH2//MARCH8//SIAH1//FKBP1B//SOCS1//LRP6//AKTIP//WNT3A//TUBA1A//DNAJA2//HSPA4L//C1QA//FBXW7//UBE2H//BRAP//CDC23//FBXL2//RNF130//RNF213//EEF2//MRPS12//EIF2B5//APP//ATXN2//TARBP2//METAP1//ARAF//GGCX//PCMT1//PLAT//HERC1//TTLL4//NAGPA//CAMK2G//IKBKB//PKN2//DYRK4//DYRK1B//LATS…
GO:0006793	phosphorus metabolic process	Biological process	67	1464	410	14742	1.64553	2.85746e-05	0.00144982	4.54402	CCNE1//CCNT2//CDC25A//CDKN1C//CCNL2//CRK//MAP3K1//MAP2K1//TAOK2//MAP3K11//PAK3//MAP3K2//DUSP2//PPP2R1A//DUSP16//SOCS1//LRP6//AKTIP//WNT3A//FBXW7//APP//ARAF//CAMK2G//IKBKB//PKN2//DYRK4//DYRK1B//LATS2//TAOK3//NLK//PBK//GNAQ//TARBP2//PPP6C//PTPN21//CTDSP1//PPM1M//ENPP1//CHEK1//HDGF//IL8//WFS1//TSPYL2//PPAP2A//ZFP91//WNT7A//FGD4//SMAD7//SYTL2//FGFR2//RELN//WEE1//ABI2//VEGFA//FKBP1B//UBE2B//CDC42//SNC…
GO:0006796	phosphate-containing compound metabolic process	Biological process	67	1464	410	14742	1.64553	2.85746e-05	0.00144982	4.54402	CCNE1//CCNT2//CDC25A//CDKN1C//CCNL2//CRK//MAP3K1//MAP2K1//TAOK2//MAP3K11//PAK3//MAP3K2//DUSP2//PPP2R1A//DUSP16//SOCS1//LRP6//AKTIP//WNT3A//FBXW7//APP//ARAF//CAMK2G//IKBKB//PKN2//DYRK4//DYRK1B//LATS2//TAOK3//NLK//PBK//GNAQ//TARBP2//PPP6C//PTPN21//CTDSP1//PPM1M//CHEK1//HDGF//IL8//WFS1//TSPYL2//PPAP2A//ZFP91//WNT7A//FGD4//SMAD7//SYTL2//FGFR2//RELN//WEE1//ABI2//ENPP1//VEGFA//FKBP1B//UBE2B//CDC42//SNC…
GO:0090263	positive regulation of canonical Wnt receptor signaling pathway	Biological process	8	45	410	14742	6.3922	2.92252e-05	0.00146539	4.53424	WNT3A//EDA//FGFR2//LRP6//ROR2//WNT7A//USP34//BAMBI
GO:0040007	growth	Biological process	40	727	410	14742	1.97833	3.00782e-05	0.00147609	4.52175	CCNE1//ESR1//TAOK2//SALL4//CARM1//WNT7A//ALOX12//RHOC//DERL2//USP47//BCL6//ENPP1//PPP2R1A//TSPYL2//SOX17//CDC42//FGFR2//NDN//SOCS1//SOCS6//ING3//BRMS1L//TSPYL5//APP//ATRN//HTRA2//ATXN2//BBC3//WFS1//LATS2//ARIH2//OMG//NTRK3//TNR//WNT3A//LRP4//KIF26B//LRP6//VEGFA//GDF11
GO:0017145	stem cell division	Biological process	6	23	410	14742	9.37985	3.01314e-05	0.00147609	4.52098	FGFR2//NUMBL//LRP6//WNT3A//WNT7A//SOX17
GO:0044093	positive regulation of molecular function	Biological process	54	1102	410	14742	1.76191	3.13151e-05	0.00151665	4.50425	CRK//MAP3K1//MAP2K1//TAOK2//MAP3K11//PAK3//MAP3K2//FBXW7//SNCA//BBC3//HDGF//IL8//WFS1//TSPYL2//GNAQ//PTH//PPAP2A//ZFP91//WNT7A//FGD4//FGFR2//KRIT1//TCF7L2//BAMBI//AKTIP//WNT3A//VEGFA//RASA1//RASGRF1//SOS1//MLL//CRTC2//EPHA2//ZNF622//CTSA//ITSN1//APH1A//PSENEN//ALOX12//RHOC//HTRA2//ZEB2//SNX13//CDC42//RELN//VLDLR//ESR1//LRP6//TCF3//EDA//IKBKB//PSMD7//CDC23//FNTA
GO:0030900	forebrain development	Biological process	19	235	410	14742	2.90709	3.22565e-05	0.00154469	4.49138	NUMBL//ZEB2//WNT3A//FGFR2//LRP6//SLC6A4//PEX13//EMX1//RELN//WNT7A//GNAQ//LHX8//NFIB//VLDLR//TNR//APP//LRP2//POU3F1//HTRA2
GO:0032989	cellular component morphogenesis	Biological process	46	888	410	14742	1.86259	3.37033e-05	0.0015722	4.47233	BCL6//RELN//SOX17//UBE2B//APP//FGFR2//PAK3//NUMBL//SLITRK3//WNT3A//AP2A1//RHOC//CDC42//MAP2K1//SCN1B//SCN8A//SIAH1//SOS1//SPTBN2//TNR//RANBP9//STIP1//DPYSL5//RGMA//SEMA6D//UCHL1//NDN//DIAPH1//RASA1//VEGFA//TAOK2//BVES//BAMBI//FBLIM1//FGD4//FGD5//SMAD7//LRP6//NFIB//OMG//WNT7A//NTRK3//ATXN2//WEE1//EPHA2
GO:0044237	cellular metabolic process	Biological process	268	8211	410	14742	1.17358	3.3734e-05	0.0015722	4.47193	KPNA2//DDAH1//CDC25A//CHEK1//MCM3//NFIB//CCNE1//CCNT2//CDKN1C//CCNL2//AHCY//BCL6//EZH1//FGFR2//HIVEP1//SMAD7//PTH//TCF7L2//TFAP2B//TLE4//MBD2//HAND1//NCOR2//SPEN//ZFPM2//SALL4//SOX17//PPP2R1A//UPF3A//WIBG//CRK//MAP3K1//MAP2K1//TAOK2//MAP3K11//PAK3//MAP3K2//DUSP2//DUSP16//PSMD7//UBE2B//ARIH2//MARCH8//SIAH1//LSM5//SF3B4//PCBP1//PCBP2//SYNCRIP//SKIV2L2//FKBP1B//XPC//ZFYVE26//PEX13//SNCA//BVES//SOCS1…
GO:0009893	positive regulation of metabolic process	Biological process	72	1617	410	14742	1.60101	3.39377e-05	0.0015722	4.46932	SNCA//BVES//AKTIP//WNT3A//CHEK1//GNAQ//PTH//ALOX12//CDC42//POU3F1//SLC6A4//UBE2B//IL1A//TCF7L2//RHOC//UPF3A//WIBG//CCNE1//CDKN1C//IKBKB//LRP6//MLL//ROR2//TBP//TCF3//TFAM//TFAP2B//WNT7A//TAF15//DYRK1B//MAP3K2//SPEN//BAMBI//SS18L1//WAC//RSF1//SOX17//HMBOX1//TFAP2D//SETD3//ACLY//AGPAT1//SMAD7//WFS1//TSPYL5//VEGFA//MAP2K1//ARAF//SMPD1//IL15//IRF1//ESR1//P2RX4//DDAH1//APP//ESRRA//FGFR2//NFATC3//NFIB//…
GO:0048856	anatomical structure development	Biological process	133	3510	410	14742	1.36244	3.54954e-05	0.00162668	4.44983	BCL6//RELN//EPHA2//GNAQ//ROR2//PTH//WNT7A//GDF11//FGFR2//IL8//TGFBI//VEGFA//SH2D2A//HAND1//SOX17//EIF2B5//CCNE1//ESR1//CRKL//TCF7L2//NFATC3//RASA1//ZFPM2//SLC5A1//APH1A//SMAD7//LRP6//DUSP2//ZEB2//WNT3A//NDN//NTRK3//PEX13//PHOX2B//TCF3//KCNJ8//LRP4//ODC1//TFAP2B//WFS1//AQP11//SALL4//STOX2//FBXW7//NFIB//MLF1//CDC42//CARM1//AFF4//UBE2B//EZH1//SIAH1//PHLDA3//FLI1//EDA//CAMK2G//SCN8A//SMPD1//VLDLR//NU…
GO:0051301	cell division	Biological process	28	437	410	14742	2.30382	3.73805e-05	0.00169485	4.42735	RASA1//SON//SEPT6//ZFYVE26//FGFR2//NUMBL//LRP6//WNT3A//RHOC//WNT7A//IL1A//VEGFA//CDC42//PKN2//SOX17//CCNE1//CCNT2//CDC25A//WEE1//TUBA1A//CDC23//KATNB1//CEP164//WAPAL//LATS2//RCC2//FSD1//NEK9
GO:0051246	regulation of protein metabolic process	Biological process	60	1283	410	14742	1.6815	4.2983e-05	0.00191842	4.3667	CCNE1//CCNT2//CDC25A//CDKN1C//CCNL2//CRK//MAP3K1//MAP2K1//TAOK2//MAP3K11//PAK3//MAP3K2//DUSP2//PPP2R1A//DUSP16//SOCS1//LRP6//AKTIP//WNT3A//FBXW7//APP//ATXN2//TARBP2//EIF2B5//METAP1//GNAQ//HDGF//IL8//WFS1//TSPYL2//PPAP2A//ZFP91//WNT7A//FGD4//SMAD7//RHOC//UPF3A//WIBG//UBE2B//TSPYL5//ENPP1//VEGFA//ARAF//CDC42//SNCA//SMPD1//IRF1//IL15//UCHL1//ZEB2//IL1A//SOX17//LATS2//RELN//VLDLR//PLAT//PSMD7//CDC23/…
GO:0031647	regulation of protein stability	Biological process	11	91	410	14742	4.34634	4.32118e-05	0.00191842	4.3644	GNAQ//SMAD7//TCF3//UBE2B//WFS1//FBXW7//SOX17//SIAH1//SNCA//CDC42//USP19
GO:0006351	transcription, DNA-dependent	Biological process	115	2950	410	14742	1.40168	4.62395e-05	0.00203168	4.33499	CCNE1//BCL6//CDKN1C//EZH1//FGFR2//HIVEP1//SMAD7//NFIB//PTH//TCF7L2//TFAP2B//TLE4//MBD2//HAND1//NCOR2//SPEN//ZFPM2//SALL4//SOX17//CCNT2//IRF1//MLL//NFATC3//ARID4A//TBP//RDBP//COPS2//TRIP11//AFF4//TH1L//POLR3G//SIRT4//CHEK1//RSF1//RUNX1T1//ELAVL2//ESR1//FLI1//HDGF//NDN//NONO//POU3F1//PPP2R1A//PKN2//TARBP2//TCF3//TMPO//ZFX//JRKL//PHOX2B//DENND4A//YAP1//CARM1//WWC1//KCNH3//ZNF777//ATAD2//GRHL1//NRBF2…
GO:0006139	nucleobase-containing compound metabolic process	Biological process	176	4970	410	14742	1.27329	5.13097e-05	0.00223145	4.2898	KPNA2//CDC25A//CHEK1//MCM3//NFIB//CCNE1//BCL6//CDKN1C//EZH1//FGFR2//HIVEP1//SMAD7//PTH//TCF7L2//TFAP2B//TLE4//MBD2//HAND1//NCOR2//SPEN//ZFPM2//SALL4//SOX17//PPP2R1A//UPF3A//WIBG//LSM5//SF3B4//PCBP1//PCBP2//SYNCRIP//SKIV2L2//XPC//ZFYVE26//CCNT2//IRF1//MLL//NFATC3//ARID4A//TBP//RDBP//COPS2//TRIP11//AFF4//TH1L//POLR3G//RSF1//ASF1B//TSPYL2//TSPYL5//SHPRH//IMPDH1//GDA//RHOC//CDC42//GNAQ//RAB5C//SAR1B/…
GO:0016070	RNA metabolic process	Biological process	137	3668	410	14742	1.34296	5.2279e-05	0.00225064	4.28167	CCNE1//BCL6//CDKN1C//EZH1//FGFR2//HIVEP1//SMAD7//NFIB//PTH//TCF7L2//TFAP2B//TLE4//MBD2//HAND1//NCOR2//SPEN//ZFPM2//SALL4//SOX17//PPP2R1A//UPF3A//WIBG//LSM5//SF3B4//PCBP1//PCBP2//SYNCRIP//SKIV2L2//CCNT2//IRF1//MLL//NFATC3//ARID4A//TBP//RDBP//COPS2//TRIP11//AFF4//TH1L//POLR3G//SIRT4//CHEK1//ESR1//MLF1//TCF3//MYNN//RSF1//RUNX1T1//ELAVL2//FLI1//HDGF//NDN//NONO//POU3F1//PKN2//TARBP2//TMPO//ZFX//JRKL//…
GO:0048103	somatic stem cell division	Biological process	5	16	410	14742	11.2363	5.50494e-05	0.00234621	4.25925	FGFR2//NUMBL//LRP6//WNT3A//WNT7A
GO:0000165	MAPK cascade	Biological process	26	400	410	14742	2.33715	5.5819e-05	0.00235545	4.25322	CRKL//MAP3K11//ROR2//WNT7A//MAP3K2//FGD4//MAP2K1//TAOK2//TAOK3//CDC42//FGFR2//WWC1//ZNF622//ZEB2//IL1A//EPHA2//ESR1//ST5//FBXW7//MAP3K1//PAK3//BRAP//NLK
GO:0007049	cell cycle	Biological process	61	1326	410	14742	1.65409	5.92924e-05	0.00247749	4.227	KPNA2//SON//CDC25A//CHEK1//MCM3//PSMD7//WEE1//XPC//CDC23//WAC//RFWD2//CCNE1//CCNT2//CDKN1C//CCNL2//MAP3K11//TCF3//PPP6C//CUL2//LATS2//APP//PPP2R1A//TUBA1A//CEP164//RCC2//PCBP4//DBC1//IL8//MLF1//MAP2K1//TCF7L2//SESN1//HTRA2//TP53INP1//FBXW7//KATNB1//WAPAL//PBK//FSD1//NEK9//CDC42//UBE2B//USP47//TAOK2//TAOK3//RHOC//BCL6//TSPYL2//FGFR2//LRP6//PGGT1B//SLC6A4//IL1A//PKN2//USP19//SIAH1//RASSF2//TUSC2//S…
GO:0060828	regulation of canonical Wnt receptor signaling pathway	Biological process	12	112	410	14742	3.85244	6.55013e-05	0.00271036	4.18375	LRP4//ROR2//TCF7L2//LATS2//SOX17//EDA//FGFR2//LRP6//WNT7A//USP34//BAMBI//WNT3A
GO:0030154	cell differentiation	Biological process	97	2408	410	14742	1.4484	6.62533e-05	0.00271511	4.17879	RELN//EPHA2//RASA1//VEGFA//ZFPM2//SOX17//WNT3A//ZEB2//NDN//NTRK3//PEX13//PHOX2B//TCF3//HAND1//NFIB//TGFBI//ESR1//MLF1//CDC42//AFF4//UBE2B//NUMBL//APP//FGFR2//PAK3//SLITRK3//AP2A1//RHOC//MAP2K1//SCN1B//SCN8A//SIAH1//SOS1//SPTBN2//TNR//RANBP9//STIP1//DPYSL5//RGMA//SEMA6D//UCHL1//DYRK1B//BAMBI//SMAD7//KATNB1//EIF2B5//LRP6//WNT7A//GNAQ//SS18L1//ATXN2//LHX8//TCF7L2//POU3F1//EMX1//PSD//BCL6//LATS2//OMG…
GO:0018193	peptidyl-amino acid modification	Biological process	33	576	410	14742	2.05998	7.09805e-05	0.00288113	4.14886	FKBP1B//SMAD7//GGCX//EZH1//SUV420H2//SETD3//TTLL4//MAP3K1//CHEK1//NLK//FGFR2//RELN//WEE1//ABI2//METAP1//PMM1//TUSC3//SAR1B//CARM1//ARAF//CDC42//SNCA//VEGFA//WNT3A//IRF1//IL15//PPP2R1A//SOCS1//TCF3//PHF15//BRPF3//ING3//MLL
GO:0010608	posttranscriptional regulation of gene expression	Biological process	22	316	410	14742	2.50327	7.69776e-05	0.00306671	4.11364	APP//ATXN2//TARBP2//EIF2B5//METAP1//RHOC//UPF3A//WIBG//GNAQ//SMAD7//TCF3//UBE2B//WFS1//FBXW7//SOX17//CDC42//USP19//SIAH1//SNCA//SERBP1//VEGFA//SYNCRIP
GO:0016055	Wnt receptor signaling pathway	Biological process	20	272	410	14742	2.64383	7.69915e-05	0.00306671	4.11356	WNT3A//SOX17//ROR2//LRP6//PPP2R1A//FGFR2//MBD2//ZEB2//NLK//WNT7A//TCF7L2//CDC42//UBE2B//LRP4//LATS2//EDA//USP34//BAMBI//CCNE1//TLE4
GO:0031175	neuron projection development	Biological process	35	632	410	14742	1.99124	8.44612e-05	0.00333309	4.07334	APP//FGFR2//PAK3//NUMBL//SLITRK3//WNT3A//AP2A1//RHOC//CDC42//MAP2K1//RELN//SCN1B//SCN8A//SIAH1//SOS1//SPTBN2//TNR//RANBP9//STIP1//DPYSL5//RGMA//SEMA6D//UCHL1//NDN//KATNB1//SS18L1//NFIB//OMG//WNT7A//NTRK3//ATXN2//WEE1//NLGN1//DIAPH1//RASGRF1
GO:0000904	cell morphogenesis involved in differentiation	Biological process	35	634	410	14742	1.98496	8.99055e-05	0.00350019	4.04621	SOX17//APP//FGFR2//PAK3//NUMBL//SLITRK3//WNT3A//AP2A1//RHOC//CDC42//MAP2K1//RELN//SCN1B//SCN8A//SIAH1//SOS1//SPTBN2//TNR//RANBP9//STIP1//DPYSL5//RGMA//SEMA6D//UCHL1//NDN//BAMBI//SMAD7//LRP6//NFIB//WNT7A//BVES//OMG//NTRK3//EPHA2
GO:0040008	regulation of growth	Biological process	29	484	410	14742	2.15439	9.03381e-05	0.00350019	4.04413	TAOK2//CARM1//ALOX12//RHOC//DERL2//USP47//BCL6//ENPP1//PPP2R1A//TSPYL2//SOX17//APP//FGFR2//ATRN//HTRA2//ATXN2//BBC3//WFS1//LATS2//OMG//NTRK3//TNR//WNT3A//NDN//SOCS1//SOCS6//ING3//BRMS1L//TSPYL5
GO:0048869	cellular developmental process	Biological process	101	2554	410	14742	1.42191	9.27298e-05	0.00356049	4.03278	BCL6//RELN//EPHA2//RASA1//VEGFA//ZFPM2//SOX17//WNT3A//ZEB2//NDN//NTRK3//PEX13//PHOX2B//TCF3//HAND1//NFIB//TGFBI//ESR1//MLF1//CDC42//AFF4//UBE2B//NUMBL//APP//FGFR2//PAK3//SLITRK3//AP2A1//RHOC//MAP2K1//SCN1B//SCN8A//SIAH1//SOS1//SPTBN2//TNR//RANBP9//STIP1//DPYSL5//RGMA//SEMA6D//UCHL1//DYRK1B//DIAPH1//TAOK2//BVES//BAMBI//FBLIM1//FGD4//FGD5//SMAD7//KATNB1//EIF2B5//LRP6//WNT7A//GNAQ//SS18L1//ATXN2//LH…
GO:2000026	regulation of multicellular organismal development	Biological process	47	957	410	14742	1.76587	0.000101104	0.00384738	3.99523	WNT3A//SOX17//CARM1//BAMBI//SMAD7//KATNB1//TNR//BAI3//KRIT1//TIE1//SLC6A4//ENPP1//PTH//WNT7A//IL15//BCL6//TCF7L2//ALOX12//SMAP1//MBNL3//NLGN1//APP//RHOC//PHOX2B//GDF11//CTDSP1//TCF3//ESRRA//EPHA2//EGLN1//IL1A//VEGFA//DDAH1//ANGPTL4//LAMA3//USP19//OMG//NTRK3//NUMBL//SPEN//FGFR2//ROR2//ESR1//LRP6//ZFPM2//FBXW7//NFIB
GO:0032774	RNA biosynthetic process	Biological process	116	3036	410	14742	1.37382	0.000102151	0.0038528	3.99076	CCNE1//BCL6//CDKN1C//EZH1//FGFR2//HIVEP1//SMAD7//NFIB//PTH//TCF7L2//TFAP2B//TLE4//MBD2//HAND1//NCOR2//SPEN//ZFPM2//SALL4//SOX17//CCNT2//IRF1//MLL//NFATC3//ARID4A//TBP//RDBP//COPS2//TRIP11//AFF4//TH1L//POLR3G//SIRT4//CHEK1//ESR1//MLF1//TCF3//MYNN//RSF1//RUNX1T1//ELAVL2//FLI1//HDGF//NDN//NONO//POU3F1//PPP2R1A//PKN2//TARBP2//TMPO//ZFX//JRKL//PHOX2B//DENND4A//YAP1//CARM1//WWC1//KCNH3//ZNF777//ATAD2//…
GO:0007165	signal transduction	Biological process	143	3923	410	14742	1.31066	0.00011194	0.00417292	3.95101	MAP3K1//PAK3//MAP2K1//BRAP//TAOK3//NLK//MAP3K11//MAP3K2//DUSP2//PPP2R1A//DUSP16//AGPAT1//IKBKB//WNT3A//SOX17//CCNE1//LRP6//TCF7L2//TLE4//USP34//ROR2//NTRK3//ARAF//CRKL//IL8//SMAD7//PLCD1//RASA1//SOCS1//SOCS6//MLL3//FBXW7//PSMD7//PCBP4//RFWD2//WFS1//HDGF//TSPYL2//AP2A1//CDC42//SOS1//APP//FNTA//BAI3//GNAQ//GPR6//GPR12//PTH//LPHN2//PPAP2A//GABRE//SPEN//APH1A//PSENEN//MCTP2//LATS2//IRF1//ZFP91//WNT7A…
GO:0007399	nervous system development	Biological process	69	1590	410	14742	1.56036	0.000112597	0.00417292	3.94848	NDN//NTRK3//PEX13//RELN//PHOX2B//LRP6//ZEB2//SALL4//NUMBL//APP//FGFR2//PAK3//SLITRK3//WNT3A//AP2A1//RHOC//CDC42//MAP2K1//SCN1B//SCN8A//SIAH1//SOS1//SPTBN2//TNR//RANBP9//STIP1//DPYSL5//RGMA//SEMA6D//UCHL1//NLGN1//TIMP4//JRKL//EMX1//SLC6A4//TCF7L2//POU3F1//NFIB//KATNB1//EIF2B5//EPHA2//GNAQ//SS18L1//GDF11//VLDLR//ATXN2//WNT7A//LHX8//SOX17//PSD//LRP2//HTRA2//OMG//DIAPH1//RASGRF1//VEGFA//CDKN1C//VSX1/…
GO:0034641	cellular nitrogen compound metabolic process	Biological process	186	5381	410	14742	1.24286	0.000115218	0.00423328	3.93848	KPNA2//DDAH1//CDC25A//CHEK1//MCM3//NFIB//CCNE1//AHCY//BCL6//CDKN1C//EZH1//FGFR2//HIVEP1//SMAD7//PTH//TCF7L2//TFAP2B//TLE4//MBD2//HAND1//NCOR2//SPEN//ZFPM2//SALL4//SOX17//PPP2R1A//UPF3A//WIBG//LSM5//SF3B4//PCBP1//PCBP2//SYNCRIP//SKIV2L2//XPC//ZFYVE26//CCNT2//IRF1//MLL//NFATC3//ARID4A//TBP//RDBP//COPS2//TRIP11//AFF4//TH1L//POLR3G//RSF1//ASF1B//TSPYL2//TSPYL5//SHPRH//GDA//IMPDH1//RHOC//CDC42//GNAQ//…
GO:0031328	positive regulation of cellular biosynthetic process	Biological process	54	1164	410	14742	1.66807	0.000133147	0.00485019	3.87567	CHEK1//GNAQ//PTH//TCF7L2//RHOC//UPF3A//WIBG//CCNE1//CDKN1C//IKBKB//LRP6//MLL//ROR2//POU3F1//TBP//TCF3//TFAM//TFAP2B//WNT7A//TAF15//DYRK1B//MAP3K2//SPEN//BAMBI//SS18L1//WAC//RSF1//SOX17//HMBOX1//TFAP2D//SETD3//WNT3A//MAP2K1//IRF1//IL1A//ESR1//P2RX4//DDAH1//CDC42//APP//ESRRA//FGFR2//NFATC3//NFIB//VEGFA//PHOX2B//HAND1//ZFPM2//SALL4//EIF2B5//MAP3K1//RDBP//TH1L//SNCA
GO:0060412	ventricular septum morphogenesis	Biological process	5	19	410	14742	9.46213	0.00013678	0.00492522	3.86398	FGFR2//LRP6//SMAD7//ZFPM2//EGLN1
GO:0007275	multicellular organismal development	Biological process	135	3675	410	14742	1.32084	0.000137518	0.00492522	3.86164	WNT7A//EPHA2//GNAQ//ROR2//PTH//GDF11//FGFR2//IL8//TGFBI//VEGFA//SH2D2A//HAND1//SOX17//EIF2B5//CCNE1//ESR1//CRKL//TCF7L2//NFATC3//RASA1//ZFPM2//SLC5A1//APH1A//SMAD7//TIE1//UBE2B//PITPNB//SALL4//WNT3A//LRP6//DUSP2//ZEB2//NDN//NTRK3//PEX13//RELN//PHOX2B//TCF3//KCNJ8//LRP4//ODC1//TFAP2B//WFS1//AQP11//STOX2//FBXW7//NFIB//MLF1//CDC42//CARM1//GGCX//FLI1//CAMK2G//SCN8A//SIAH1//SMPD1//VLDLR//NUMBL//GDA//N…
GO:0022402	cell cycle process	Biological process	48	1000	410	14742	1.72589	0.000146795	0.00521366	3.83329	KPNA2//SON//CDC25A//CHEK1//MCM3//PSMD7//WEE1//XPC//CDC23//WAC//RFWD2//CDKN1C//MAP3K11//TCF3//CCNE1//PPP6C//CUL2//LATS2//APP//PPP2R1A//TUBA1A//CEP164//RCC2//PCBP4//DBC1//IL8//MLF1//MAP2K1//TCF7L2//SESN1//HTRA2//TP53INP1//FBXW7//KATNB1//WAPAL//PBK//FSD1//NEK9//CDC42//UBE2B//USP47//TAOK2//TAOK3//RHOC//BCL6//IL1A//PKN2//USP19
GO:0051716	cellular response to stimulus	Biological process	167	4754	410	14742	1.26308	0.000152646	0.00537666	3.81632	CHEK1//MAP3K1//PAK3//MAP2K1//BRAP//TAOK3//NLK//MAP3K11//MAP3K2//DUSP2//PPP2R1A//DUSP16//XPC//ZFYVE26//AGPAT1//IKBKB//VEGFA//WNT3A//SOX17//CCNE1//LRP6//TCF7L2//TLE4//USP34//ROR2//RHOC//EDA//ESR1//GABRB3//HDGF//IL8//IL15//MFAP4//OCRL//P2RX4//PDE3B//PKN2//PSD//RALGDS//RASA1//RASGRF1//RTKN//SMPD1//SOS1//TIE1//TNR//VLDLR//WNT7A//ZYX//BCAR3//SH2D2A//COPS2//RASSF2//IPO7//ANGPTL4//CC2D1A//DPYSL5//ODZ2//A…
GO:0090304	nucleic acid metabolic process	Biological process	150	4183	410	14742	1.28937	0.000156884	0.00548065	3.80442	KPNA2//CDC25A//CHEK1//MCM3//NFIB//CCNE1//BCL6//CDKN1C//EZH1//FGFR2//HIVEP1//SMAD7//PTH//TCF7L2//TFAP2B//TLE4//MBD2//HAND1//NCOR2//SPEN//ZFPM2//SALL4//SOX17//PPP2R1A//UPF3A//WIBG//LSM5//SF3B4//PCBP1//PCBP2//SYNCRIP//SKIV2L2//XPC//ZFYVE26//CCNT2//IRF1//MLL//NFATC3//ARID4A//TBP//RDBP//COPS2//TRIP11//AFF4//TH1L//POLR3G//RSF1//ASF1B//TSPYL2//TSPYL5//SHPRH//MYO18A//TFAM//NONO//UBE2B//CEP164//TAOK3//C11…
GO:0071900	regulation of protein serine/threonine kinase activity	Biological process	22	334	410	14742	2.36837	0.000171543	0.00594404	3.76563	CCNE1//CCNT2//CDC25A//CDKN1C//CCNL2//MAP3K11//PAK3//MAP2K1//MAP3K2//DUSP2//PPP2R1A//DUSP16//ZFP91//WNT7A//FGD4//VEGFA//SMPD1//UCHL1//ZEB2//LATS2//LRP6//SNCA
GO:0006807	nitrogen compound metabolic process	Biological process	188	5488	410	14742	1.23173	0.000176886	0.00607973	3.75231	KPNA2//DDAH1//CDC25A//CHEK1//MCM3//NFIB//CCNE1//AHCY//BCL6//CDKN1C//EZH1//FGFR2//HIVEP1//SMAD7//PTH//TCF7L2//TFAP2B//TLE4//MBD2//HAND1//NCOR2//SPEN//ZFPM2//SALL4//SOX17//PPP2R1A//UPF3A//WIBG//LSM5//SF3B4//PCBP1//PCBP2//SYNCRIP//SKIV2L2//XPC//ZFYVE26//CCNT2//IRF1//MLL//NFATC3//ARID4A//TBP//RDBP//COPS2//TRIP11//AFF4//TH1L//POLR3G//RSF1//ASF1B//TSPYL2//TSPYL5//SHPRH//GDA//IMPDH1//RHOC//CDC42//GNAQ//…
GO:0021872	forebrain generation of neurons	Biological process	6	31	410	14742	6.95924	0.000182032	0.00611525	3.73985	FGFR2//NUMBL//LRP6//WNT3A//GNAQ//LHX8
GO:0060411	cardiac septum morphogenesis	Biological process	6	31	410	14742	6.95924	0.000182032	0.00611525	3.73985	FGFR2//ZFPM2//SMAD7//EGLN1//LRP6//HAND1
GO:0065008	regulation of biological quality	Biological process	91	2286	410	14742	1.43132	0.000183096	0.00611525	3.73732	GNAQ//IL1A//P2RX4//SNCA//CACNA1E//CORIN//MAP2K1//DDAH1//TFAP2B//WFS1//HAS2//SCN1B//ACTN1//APP//ATP2A2//CDC42//CRK//GGCX//IRF1//KCNMA1//PDE3B//PLAT//SOS1//STXBP3//VEGFA//WEE1//ZFPM2//BRPF3//NLGN1//KRIT1//TUSC3//GPR12//PTH//KCNN4//GPR6//WNT7A//GLS2//FLI1//RHOC//ESR1//NISCH//DIAPH1//RASA1//TAOK2//BVES//BAMBI//FBLIM1//FGD4//FGD5//POU3F1//FKBP1B//SLC22A17//SMAD7//TCF3//UBE2B//FBXW7//SOX17//NTRK3//CAMK…
GO:0043408	regulation of MAPK cascade	Biological process	20	290	410	14742	2.47973	0.000183659	0.00611525	3.73599	DUSP2//PPP2R1A//DUSP16//MAP3K11//WNT7A//MAP3K2//FGD4//MAP2K1//TAOK2//TAOK3//CDC42//FGFR2//WWC1//ZNF622//ZEB2//IL1A//EPHA2//ESR1//ST5//FBXW7
GO:0060070	canonical Wnt receptor signaling pathway	Biological process	14	163	410	14742	3.08825	0.000185945	0.00614341	3.73061	WNT3A//TCF7L2//LRP6//LRP4//ROR2//LATS2//SOX17//EDA//FGFR2//WNT7A//USP34//BAMBI//CDC42//UBE2B
GO:0003279	cardiac septum development	Biological process	7	44	410	14742	5.72029	0.000192549	0.00631264	3.71546	FGFR2//ZFPM2//SALL4//HAND1//SMAD7//EGLN1//LRP6
GO:0009891	positive regulation of biosynthetic process	Biological process	54	1183	410	14742	1.64128	0.000200604	0.00652651	3.69766	CHEK1//GNAQ//PTH//IL1A//TCF7L2//RHOC//UPF3A//WIBG//CCNE1//CDKN1C//IKBKB//LRP6//MLL//ROR2//POU3F1//TBP//TCF3//TFAM//TFAP2B//WNT7A//TAF15//DYRK1B//MAP3K2//SPEN//BAMBI//SS18L1//WAC//RSF1//SOX17//HMBOX1//TFAP2D//SETD3//WNT3A//MAP2K1//IRF1//ESR1//P2RX4//DDAH1//CDC42//APP//ESRRA//FGFR2//NFATC3//NFIB//VEGFA//PHOX2B//HAND1//ZFPM2//SALL4//EIF2B5//MAP3K1//RDBP//TH1L//SNCA
GO:0010740	positive regulation of intracellular protein kinase cascade	Biological process	22	339	410	14742	2.33343	0.000211673	0.00683447	3.67433	TAOK2//TAOK3//IL15//RHOC//EDA//IKBKB//IL1A//CC2D1A//CDC42//FGFR2//WWC1//ZNF622//MAP3K11//WNT7A//ITSN1//TCF7L2//TSPYL5//ESR1//ST5//FBXW7//VEGFA//NLGN1
GO:0010942	positive regulation of cell death	Biological process	32	586	410	14742	1.96347	0.000219578	0.0070364	3.65841	BBC3//APP//PPP2R1A//DEDD//PHLDA3//TP53INP1//RASGRF1//ITSN1//SOS1//ARHGEF3//APH1A//PSENEN//FGD4//PTH//PPP3CC//CUL2//HTRA2//PCBP4//ZNF622//ALOX12//BCL6//KCNMA1//LRP6//MAP3K1//SIAH1//SMPD1//ING3//RHOC//MAP3K11//TFAP2B//IRF1//KATNB1
GO:0048812	neuron projection morphogenesis	Biological process	30	537	410	14742	2.00872	0.000234408	0.00745556	3.63003	APP//FGFR2//PAK3//NUMBL//SLITRK3//WNT3A//AP2A1//RHOC//CDC42//MAP2K1//RELN//SCN1B//SCN8A//SIAH1//SOS1//SPTBN2//TNR//RANBP9//STIP1//DPYSL5//RGMA//SEMA6D//UCHL1//NDN//NFIB//OMG//WNT7A//NTRK3//ATXN2//WEE1
GO:0003281	ventricular septum development	Biological process	6	33	410	14742	6.53747	0.00026126	0.00821086	3.58293	FGFR2//SMAD7//ZFPM2//EGLN1//LRP6//SALL4
GO:0007409	axonogenesis	Biological process	28	490	410	14742	2.05463	0.000262008	0.00821086	3.58169	AP2A1//RHOC//CDC42//MAP2K1//RELN//SCN1B//SCN8A//SIAH1//SOS1//SPTBN2//TNR//RANBP9//STIP1//DPYSL5//RGMA//SEMA6D//WNT3A//UCHL1//NDN//APP//NFIB//WNT7A//OMG//NTRK3//FGFR2//PAK3//NUMBL//SLITRK3
GO:0045786	negative regulation of cell cycle	Biological process	26	443	410	14742	2.11029	0.000287256	0.00893639	3.54173	CDC25A//CHEK1//MCM3//PSMD7//WEE1//XPC//CDC23//WAC//RFWD2//PCBP4//CDKN1C//DBC1//IL8//MLF1//MAP2K1//TCF7L2//CUL2//SESN1//HTRA2//TP53INP1//USP47//TAOK2//TAOK3//LATS2//BCL6//TSPYL2
GO:0032502	developmental process	Biological process	146	4104	410	14742	1.27914	0.000302756	0.00935033	3.51891	WNT7A//BCL6//RELN//TMEM115//EPHA2//GNAQ//ROR2//PTH//GDF11//FGFR2//IL8//TGFBI//VEGFA//SH2D2A//HAND1//SOX17//EIF2B5//CCNE1//ESR1//CRKL//TCF7L2//NFATC3//RASA1//ZFPM2//WNT3A//SLC5A1//APH1A//SMAD7//TIE1//UBE2B//PITPNB//SALL4//LRP6//DUSP2//ZEB2//NDN//NTRK3//PEX13//PHOX2B//TCF3//KCNJ8//LRP4//ODC1//TFAP2B//WFS1//AQP11//STOX2//FBXW7//NFIB//MLF1//CDC42//CARM1//CAMK2G//EDA//EMX1//HOXC9//HOXC11//PAK3//SIAH1/…
GO:0008152	metabolic process	Biological process	287	9124	410	14742	1.13102	0.000305816	0.00937689	3.51454	KPNA2//DDAH1//CDC25A//CHEK1//MCM3//NFIB//CCNE1//CCNT2//CDKN1C//CCNL2//AHCY//BCL6//EZH1//FGFR2//HIVEP1//SMAD7//PTH//TCF7L2//TFAP2B//TLE4//MBD2//HAND1//NCOR2//SPEN//ZFPM2//SALL4//SOX17//PPP2R1A//UPF3A//WIBG//CRK//MAP3K1//MAP2K1//TAOK2//MAP3K11//PAK3//MAP3K2//DUSP2//DUSP16//PSMD7//UBE2B//ARIH2//MARCH8//SIAH1//LSM5//SF3B4//PCBP1//PCBP2//SYNCRIP//SKIV2L2//FKBP1B//XPC//ZFYVE26//PEX13//SNCA//BVES//SOCS1…
GO:0051254	positive regulation of RNA metabolic process	Biological process	45	950	410	14742	1.70318	0.000319867	0.00973766	3.49503	CHEK1//CCNE1//CDKN1C//IKBKB//LRP6//MLL//ROR2//POU3F1//TBP//TCF3//TFAM//TFAP2B//WNT7A//TAF15//DYRK1B//MAP3K2//SPEN//BAMBI//SS18L1//WAC//RSF1//SOX17//HMBOX1//TFAP2D//SETD3//WNT3A//MAP2K1//APP//ESR1//ESRRA//FGFR2//IL1A//IRF1//NFATC3//NFIB//PTH//TCF7L2//VEGFA//PHOX2B//HAND1//ZFPM2//SALL4//MAP3K1//RDBP//TH1L
GO:0080135	regulation of cellular response to stress	Biological process	17	236	410	14742	2.59006	0.000333597	0.0100836	3.47678	MAP3K11//WNT7A//MAP3K2//FGD4//CHEK1//MAP2K1//TAOK2//TAOK3//ZEB2//CDC42//IL1A//ZNF622//OMG//NTRK3//TNR//USP19//KIAA1324
GO:0018022	peptidyl-lysine methylation	Biological process	4	13	410	14742	11.0634	0.000345327	0.0103647	3.46177	SETD3//MLL//EZH1//SUV420H2
GO:0021846	cell proliferation in forebrain	Biological process	5	23	410	14742	7.81654	0.000361113	0.0107627	3.44236	FGFR2//NUMBL//WNT7A//ZEB2//WNT3A
GO:0048584	positive regulation of response to stimulus	Biological process	46	985	410	14742	1.67917	0.000374429	0.0110116	3.42663	AGPAT1//IKBKB//MAP3K1//MAP2K1//C1QA//FBXW7//PTH//VEGFA//NLGN1//KCNN4//FGFR2//MBD2//ZEB2//CDKN1C//TAOK2//TAOK3//IL15//RHOC//EDA//IL1A//CC2D1A//CDC42//WWC1//ZNF622//POLR3G//ESR1//MAP3K11//WNT7A//RASGRF1//NTRK3//P2RX4//IL8//RELN//ITSN1//TCF7L2//TSPYL5//ST5//LRP6//ROR2//USP34//BAMBI//WNT3A//MLL//SIAH1//BBC3//HTRA2
GO:0043085	positive regulation of catalytic activity	Biological process	44	929	410	14742	1.70298	0.000374631	0.0110116	3.4264	CRK//MAP3K1//MAP2K1//TAOK2//MAP3K11//PAK3//MAP3K2//FBXW7//SNCA//BBC3//HDGF//IL8//WFS1//TSPYL2//GNAQ//PTH//PPAP2A//ZFP91//WNT7A//FGD4//FGFR2//VEGFA//RASA1//RASGRF1//SOS1//EPHA2//ZNF622//ALOX12//RHOC//HTRA2//WNT3A//ZEB2//SNX13//CDC42//RELN//VLDLR//ESR1//PSMD7//CDC23//FNTA//CTSA//ITSN1//APH1A//PSENEN
GO:0046330	positive regulation of JNK cascade	Biological process	7	49	410	14742	5.13659	0.000383058	0.0111821	3.41674	CDC42//IL1A//MAP3K11//WNT7A//TAOK2//TAOK3//ZNF622
GO:0030155	regulation of cell adhesion	Biological process	17	240	410	14742	2.54689	0.000405324	0.0117516	3.3922	BCL6//RASA1//CASK//PDE3B//TGFBI//TNR//SMAD7//KIF26B//EPHA2//MAP2K1//ALOX12//RHOC//VEGFA//WNT3A//IL8//LAMA3//PPP2R1A
GO:0060560	developmental growth involved in morphogenesis	Biological process	11	117	410	14742	3.38049	0.000415838	0.011975	3.38108	CARM1//APP//NDN//OMG//NTRK3//TNR//WNT3A//FGFR2//ESR1//KIF26B//LRP6
GO:0051173	positive regulation of nitrogen compound metabolic process	Biological process	50	1110	410	14742	1.61964	0.000476583	0.0136322	3.32186	CHEK1//GNAQ//PTH//UBE2B//CCNE1//CDKN1C//IKBKB//LRP6//MLL//ROR2//POU3F1//TBP//TCF3//TFAM//TFAP2B//WNT7A//TAF15//DYRK1B//MAP3K2//SPEN//BAMBI//SS18L1//WAC//RSF1//SOX17//HMBOX1//TFAP2D//SETD3//WNT3A//MAP2K1//ESR1//P2RX4//DDAH1//CDC42//APP//ESRRA//FGFR2//IL1A//IRF1//NFATC3//NFIB//TCF7L2//VEGFA//PHOX2B//HAND1//ZFPM2//SALL4//MAP3K1//RDBP//TH1L
GO:0043065	positive regulation of apoptotic process	Biological process	30	569	410	14742	1.89575	0.000615365	0.0174846	3.21087	BBC3//APP//PPP2R1A//DEDD//PHLDA3//TP53INP1//RASGRF1//ITSN1//SOS1//ARHGEF3//APH1A//PSENEN//FGD4//PTH//PPP3CC//CUL2//HTRA2//PCBP4//ZNF622//RHOC//MAP3K11//TFAP2B//ALOX12//BCL6//KCNMA1//LRP6//MAP3K1//SIAH1//SMPD1//ING3
GO:0007264	small GTPase mediated signal transduction	Biological process	31	598	410	14742	1.86394	0.000663465	0.0187264	3.17818	CRKL//MAP2K1//RALGDS//SOS1//BRAP//PTH//RTKN//ARHGEF3//NISCH//PSD//PSD3//CRK//RASGRF1//ITSN1//FGD4//FGD5//BCL6//RASA1//RHOC//CDC42//OCRL//SIPA1L2//RELN//KRIT1//RAB5C//BCAR3//YWHAQ//LRRK1
GO:0032874	positive regulation of stress-activated MAPK cascade	Biological process	7	54	410	14742	4.66098	0.00070106	0.0196573	3.15424	CDC42//IL1A//MAP3K11//WNT7A//TAOK2//TAOK3//ZNF622
GO:0043068	positive regulation of programmed cell death	Biological process	30	574	410	14742	1.87924	0.000708899	0.0197472	3.14942	BBC3//APP//PPP2R1A//DEDD//PHLDA3//TP53INP1//RASGRF1//ITSN1//SOS1//ARHGEF3//APH1A//PSENEN//FGD4//PTH//PPP3CC//CUL2//HTRA2//PCBP4//ZNF622//ALOX12//BCL6//KCNMA1//LRP6//MAP3K1//SIAH1//SMPD1//ING3//RHOC//MAP3K11//TFAP2B
GO:0070304	positive regulation of stress-activated protein kinase signaling cascade	Biological process	7	55	410	14742	4.57623	0.00078441	0.0216412	3.10546	TAOK2//TAOK3//CDC42//IL1A//MAP3K11//WNT7A//ZNF622
GO:0033674	positive regulation of kinase activity	Biological process	24	423	410	14742	2.04006	0.000787046	0.0216412	3.104	CRK//MAP3K1//MAP2K1//TAOK2//MAP3K11//PAK3//MAP3K2//FBXW7//HDGF//IL8//WFS1//TSPYL2//PPAP2A//ZFP91//WNT7A//FGD4//VEGFA//ZEB2//CDC42//RELN//VLDLR//WNT3A//SNCA//ZNF622
GO:0010628	positive regulation of gene expression	Biological process	44	964	410	14742	1.64115	0.000808367	0.022085	3.09239	CHEK1//CCNE1//CDKN1C//IKBKB//LRP6//MLL//ROR2//POU3F1//TBP//TCF3//TFAM//TFAP2B//WNT7A//TAF15//DYRK1B//MAP3K2//SPEN//BAMBI//SS18L1//WAC//RSF1//SOX17//HMBOX1//TFAP2D//SETD3//WNT3A//ESR1//APP//ESRRA//FGFR2//IL1A//IRF1//NFATC3//NFIB//PTH//TCF7L2//VEGFA//PHOX2B//HAND1//ZFPM2//SALL4//ALOX12//CDC42//SLC6A4
GO:0048513	organ development	Biological process	83	2141	410	14742	1.39391	0.000864672	0.0234728	3.06315	ROR2//VEGFA//EIF2B5//CCNE1//ESR1//SLC5A1//GDF11//APH1A//ZEB2//TCF3//KCNJ8//LRP4//ODC1//TFAP2B//WFS1//AQP11//STOX2//LRP6//HAND1//SOX17//WNT3A//NFIB//TGFBI//MLF1//FGFR2//ZFPM2//SALL4//CDC42//CARM1//CRKL//FLI1//EMX1//RELN//SLC6A4//TCF7L2//GNAQ//NFATC3//VLDLR//IL15//SCN8A//BVES//DYRK1B//ATP2A2//LAMA3//POU3F1//KLK7//LHX8//BAMBI//SMAD7//EPHA2//PHOX2B//NUMBL//ATXN2//WNT7A//PEX13//TNR//BCL6//MAP2K1//LATS…
GO:0010557	positive regulation of macromolecule biosynthetic process	Biological process	46	1027	410	14742	1.6105	0.000911506	0.0245876	3.04024	CHEK1//TCF7L2//RHOC//UPF3A//WIBG//CCNE1//CDKN1C//IKBKB//LRP6//MLL//ROR2//POU3F1//TBP//TCF3//TFAM//TFAP2B//WNT7A//TAF15//DYRK1B//MAP3K2//SPEN//BAMBI//SS18L1//WAC//RSF1//SOX17//HMBOX1//TFAP2D//SETD3//WNT3A//IRF1//IL1A//PTH//CDC42//APP//ESR1//ESRRA//FGFR2//NFATC3//NFIB//VEGFA//PHOX2B//HAND1//ZFPM2//SALL4//EIF2B5
GO:0030030	cell projection organization	Biological process	39	829	410	14742	1.69154	0.000920373	0.0246706	3.03604	UBE2B//APP//FGFR2//PAK3//NUMBL//SLITRK3//WNT3A//AP2A1//RHOC//CDC42//MAP2K1//RELN//SCN1B//SCN8A//SIAH1//SOS1//SPTBN2//TNR//RANBP9//STIP1//DPYSL5//RGMA//SEMA6D//UCHL1//NDN//EPHA2//KATNB1//SS18L1//NFIB//FGD4//OMG//WNT7A//DIAPH1//RASGRF1//FGD5//NTRK3//ATXN2//WEE1//NLGN1
GO:0045935	positive regulation of nucleobase-containing compound metabolic process	Biological process	48	1087	410	14742	1.58776	0.000953857	0.0251263	3.02052	CHEK1//GNAQ//PTH//UBE2B//CCNE1//CDKN1C//IKBKB//LRP6//MLL//ROR2//POU3F1//TBP//TCF3//TFAM//TFAP2B//WNT7A//TAF15//DYRK1B//MAP3K2//SPEN//BAMBI//SS18L1//WAC//RSF1//SOX17//HMBOX1//TFAP2D//SETD3//WNT3A//MAP2K1//CDC42//APP//ESR1//ESRRA//FGFR2//IL1A//IRF1//NFATC3//NFIB//TCF7L2//VEGFA//PHOX2B//HAND1//ZFPM2//SALL4//MAP3K1//RDBP//TH1L
GO:0048667	cell morphogenesis involved in neuron differentiation	Biological process	28	532	410	14742	1.89243	0.000954233	0.0251263	3.02035	APP//FGFR2//PAK3//NUMBL//SLITRK3//WNT3A//AP2A1//RHOC//CDC42//MAP2K1//RELN//SCN1B//SCN8A//SIAH1//SOS1//SPTBN2//TNR//RANBP9//STIP1//DPYSL5//RGMA//SEMA6D//UCHL1//NDN//NFIB//WNT7A//OMG//NTRK3
GO:0051641	cellular localization	Biological process	72	1806	410	14742	1.43347	0.000955059	0.0251263	3.01997	TRIP11//BCL6//BBC3//SNCA//ACTN1//APP//VEGFA//BRPF3//IPO7//STX5//NLGN1//KATNB1//YWHAQ//KPNA2//TAOK2//NAGPA//UCP2//AP2A1//CTSA//AP1M1//EXPH5//SNX13//TNPO2//SAR1B//SYTL2//SYTL4//STXBP5L//VAMP8//STXBP3//VPS33B//UPF3A//CDC23//CDC42//WNT7A//GLS2//TRIM36//CACNA1E//TFAP2B//KIF1B//M6PR//AKTIP//FKBP1B//SNCG//PEX5L//PEX13//TRPV6//UCHL1//CAMK2G//TUBA1A//DERL2//TCF7L2//MAP2K1//LATS2//WNT3A//SMAD7//DIAPH1//GNA…
GO:0010741	negative regulation of intracellular protein kinase cascade	Biological process	10	110	410	14742	3.26874	0.000979407	0.0256088	3.00904	DUSP2//PPP2R1A//DUSP16//IRF1//SOCS1//RHOC//ESR1//TAOK3//EPHA2//PHLDA3
GO:0051056	regulation of small GTPase mediated signal transduction	Biological process	21	356	410	14742	2.12101	0.00101643	0.0264147	2.99292	PSD//PSD3//SMAP1//BVES//BCL6//CRK//MAP2K1//RASA1//RASGRF1//SOS1//EPHA2//ITSN1//ARHGEF3//FGD4//FGD5//RELN//RHOC//CDC42//OCRL//RALGDS//SIPA1L2
GO:0051347	positive regulation of transferase activity	Biological process	24	432	410	14742	1.99756	0.001052	0.0271734	2.97799	CRK//MAP3K1//MAP2K1//TAOK2//MAP3K11//PAK3//MAP3K2//FBXW7//HDGF//IL8//WFS1//TSPYL2//PPAP2A//ZFP91//WNT7A//FGD4//VEGFA//ZNF622//ZEB2//CDC42//RELN//VLDLR//WNT3A//SNCA
GO:0007050	cell cycle arrest	Biological process	22	382	410	14742	2.07077	0.00106235	0.0272756	2.97373	CDC25A//CHEK1//MCM3//PSMD7//WEE1//XPC//CDC23//WAC//RFWD2//PCBP4//TAOK2//TAOK3//CDKN1C//DBC1//IL8//MLF1//MAP2K1//TCF7L2//CUL2//SESN1//HTRA2//TP53INP1
GO:0001933	negative regulation of protein phosphorylation	Biological process	7	58	410	14742	4.33953	0.00108224	0.0274555	2.96568	SMAD7//ENPP1//UBE2B//IRF1//PPP2R1A//SOCS1//LRP6
GO:0050821	protein stabilization	Biological process	7	58	410	14742	4.33953	0.00108224	0.0274555	2.96568	GNAQ//SMAD7//TCF3//UBE2B//WFS1//FBXW7//SOX17
GO:0033135	regulation of peptidyl-serine phosphorylation	Biological process	6	43	410	14742	5.01713	0.00113785	0.0286954	2.94391	SMAD7//ARAF//CDC42//SNCA//VEGFA//WNT3A
GO:0071842	cellular component organization at cellular level	Biological process	108	2963	410	14742	1.31058	0.00115888	0.0289432	2.93596	SON//WEE1//RCC2//XPC//BBC3//ASF1B//RSF1//TSPYL2//TSPYL5//SHPRH//ACTN1//CDC42//BCL6//DIAPH1//TAOK2//NISCH//FGD4//FGD5//ABI2//VAMP8//CHEK1//UBE2B//TFAM//FNTA//HTRA2//SNCA//RANBP9//KATNB1//RAB5C//AKTIP//NAGPA//FBXW7//CDC25A//MAP2K1//CDC23//CEP164//WAPAL//LATS2//PBK//FSD1//NEK9//APP//FGFR2//PAK3//NUMBL//SLITRK3//WNT3A//AP2A1//RHOC//RELN//SCN1B//SCN8A//SIAH1//SOS1//SPTBN2//TNR//STIP1//DPYSL5//RGMA//SE…
GO:0071841	cellular component organization or biogenesis at cellular level	Biological process	111	3061	410	14742	1.30386	0.00116126	0.0289432	2.93507	SON//WEE1//RCC2//SKIV2L2//XPC//BBC3//ASF1B//RSF1//TSPYL2//TSPYL5//SHPRH//ACTN1//CDC42//BCL6//DIAPH1//TAOK2//NISCH//FGD4//FGD5//ABI2//VAMP8//CHEK1//UBE2B//PDCD11//WBP11//TFAM//FNTA//HTRA2//SNCA//RANBP9//KATNB1//RAB5C//AKTIP//NAGPA//FBXW7//CDC25A//MAP2K1//CDC23//CEP164//WAPAL//LATS2//PBK//FSD1//NEK9//APP//FGFR2//PAK3//NUMBL//SLITRK3//WNT3A//AP2A1//RHOC//RELN//SCN1B//SCN8A//SIAH1//SOS1//SPTBN2//TNR/…
GO:0051603	proteolysis involved in cellular protein catabolic process	Biological process	22	385	410	14742	2.05463	0.00117498	0.0290746	2.92997	MAP3K1//SIAH1//ARIH2//UBE2B//UBE2H//UCHL1//CUL2//CDC23//USP34//USP19//FBXL4//USP53//USP47//USP46//USP27X//HTRA2//WFS1//DERL2//PSMD7//FBXW7//SMAD7//PCBP2
GO:0022604	regulation of cell morphogenesis	Biological process	17	264	410	14742	2.31535	0.00118018	0.0290746	2.92805	DIAPH1//RASA1//VEGFA//TAOK2//BVES//BAMBI//FBLIM1//FGD4//FGD5//SMAD7//WNT7A//TCF7L2//OMG//NTRK3//TNR//WNT3A//NUMBL
GO:0008360	regulation of cell shape	Biological process	9	94	410	14742	3.44261	0.00120413	0.0294943	2.91933	DIAPH1//RASA1//VEGFA//TAOK2//BVES//BAMBI//FBLIM1//FGD4//FGD5
GO:0045893	positive regulation of transcription, DNA-dependent	Biological process	41	899	410	14742	1.63982	0.00123872	0.030168	2.90703	CHEK1//APP//ESR1//ESRRA//FGFR2//IL1A//IRF1//LRP6//MLL//NFATC3//NFIB//PTH//TCF3//TCF7L2//TFAP2B//VEGFA//WNT7A//PHOX2B//HAND1//ZFPM2//SALL4//SOX17//WNT3A//CCNE1//CDKN1C//IKBKB//ROR2//POU3F1//TBP//TFAM//TAF15//DYRK1B//MAP3K2//SPEN//BAMBI//SS18L1//WAC//RSF1//HMBOX1//TFAP2D//SETD3
GO:0055008	cardiac muscle tissue morphogenesis	Biological process	6	44	410	14742	4.9031	0.00128711	0.0310349	2.89038	ZFPM2//FGFR2//SMAD7//HAND1//LRP6//EGLN1
GO:0032872	regulation of stress-activated MAPK cascade	Biological process	11	134	410	14742	2.95162	0.00129496	0.0310349	2.88774	MAP3K11//WNT7A//MAP3K2//FGD4//TAOK2//TAOK3//ZEB2//CDC42//IL1A//ZNF622//MAP2K1
GO:0006511	ubiquitin-dependent protein catabolic process	Biological process	21	363	410	14742	2.0801	0.00129616	0.0310349	2.88734	MAP3K1//SIAH1//ARIH2//WFS1//USP19//DERL2//PSMD7//CDC23//FBXW7//SMAD7//PCBP2//UBE2B//UBE2H//UCHL1//CUL2//USP34//FBXL4//USP53//USP47//USP46//USP27X
GO:0031098	stress-activated protein kinase signaling cascade	Biological process	14	198	410	14742	2.54235	0.00130812	0.0311464	2.88335	CRKL//MAP3K11//ROR2//WNT7A//MAP3K2//FGD4//MAP2K1//TAOK2//TAOK3//ZEB2//CDC42//IL1A//ZNF622//RHOC
GO:0033554	cellular response to stress	Biological process	47	1075	410	14742	1.57203	0.00132524	0.0313787	2.87771	CHEK1//XPC//ZFYVE26//NONO//UBE2B//CEP164//TAOK3//C11ORF30//SHPRH//USP47//BCL6//TAOK2//YAP1//SESN1//WAC//FBXW7//PSMD7//PCBP4//RFWD2//WFS1//HDGF//IL8//TSPYL2//CRKL//MAP3K11//ROR2//WNT7A//MAP3K2//FGD4//KIAA1324//DERL2//RHOC//OMG//EIF2B5//MAP2K1//SNCA//IL1A//USP19//VLDLR//PHLDA3//BBC3//ZEB2//CDC42//ZNF622//NTRK3//TNR//VEGFA
GO:0070302	regulation of stress-activated protein kinase signaling cascade	Biological process	11	135	410	14742	2.92976	0.00137553	0.0323895	2.86153	MAP3K11//WNT7A//MAP3K2//FGD4//MAP2K1//TAOK2//TAOK3//ZEB2//CDC42//IL1A//ZNF622
GO:0007254	JNK cascade	Biological process	12	156	410	14742	2.76585	0.00139565	0.0326827	2.85522	MAP3K11//WNT7A//MAP3K2//FGD4//ZEB2//TAOK3//CDC42//IL1A//TAOK2//ZNF622//CRKL//ROR2
GO:0051329	interphase of mitotic cell cycle	Biological process	22	391	410	14742	2.02311	0.00143134	0.0332358	2.84426	CDKN1C//MAP3K11//TCF3//CDC23//CCNE1//CDC25A//MCM3//PPP6C//PSMD7//WEE1//CUL2//LATS2//APP//KPNA2//CHEK1//PPP2R1A//TUBA1A//CEP164//USP47//BCL6
GO:0007265	Ras protein signal transduction	Biological process	21	366	410	14742	2.06305	0.00143486	0.0332358	2.84319	PTH//RTKN//ARHGEF3//NISCH//PSD//PSD3//CRK//RASGRF1//ITSN1//SOS1//FGD4//FGD5//BCL6//MAP2K1//RASA1//CRKL//RALGDS//BRAP
GO:0051899	membrane depolarization	Biological process	7	61	410	14742	4.12611	0.00146236	0.0336895	2.83495	SCN1B//ALOX12//P2RX4//SNCA//SMAD7//NLGN1//CACNA1E
GO:0001944	vasculature development	Biological process	25	469	410	14742	1.91664	0.00148327	0.0339877	2.82878	FGFR2//IL8//TGFBI//VEGFA//SH2D2A//HAND1//SOX17//CRKL//EPHA2//TCF7L2//NFATC3//RASA1//ZFPM2//BAI3//KRIT1//TIE1//WNT7A//TFAP2B//EGLN1//IL1A//DDAH1//ANGPTL4//SMAD7//MAP2K1//FBXW7
GO:0051649	establishment of localization in cell	Biological process	65	1621	410	14742	1.44179	0.00150826	0.0343755	2.82152	TRIP11//BCL6//SNCA//ACTN1//APP//VEGFA//BRPF3//IPO7//STX5//NLGN1//KATNB1//YWHAQ//KPNA2//TAOK2//NAGPA//UCP2//AP2A1//CTSA//AP1M1//EXPH5//SNX13//TNPO2//SAR1B//SYTL2//SYTL4//STXBP5L//VAMP8//STXBP3//VPS33B//UPF3A//CDC23//CDC42//WNT7A//GLS2//TRIM36//CACNA1E//TFAP2B//KIF1B//M6PR//AKTIP//FKBP1B//SNCG//PEX5L//PEX13//TRPV6//UCHL1//CAMK2G//TUBA1A//DERL2//TCF7L2//MAP2K1//GNAQ//BAMBI//WNT3A//EDA//DUSP16//PDE3B…
GO:0032092	positive regulation of protein binding	Biological process	5	31	410	14742	5.79937	0.00151891	0.034434	2.81847	KRIT1//TCF7L2//BAMBI//AKTIP//WNT3A
GO:0071840	cellular component organization or biogenesis	Biological process	135	3883	410	14742	1.25008	0.00156734	0.0353438	2.80484	SON//WEE1//RCC2//SKIV2L2//XPC//BCL6//RELN//TAOK2//SOX17//BBC3//WNT3A//ASF1B//RSF1//TSPYL2//TSPYL5//SHPRH//ACTN1//CDC42//DIAPH1//NISCH//FGD4//FGD5//ABI2//VAMP8//CHEK1//UBE2B//PDCD11//WBP11//TFAM//MLL//PPP2R1A//RANBP9//AP2A1//APP//LRP2//LRP4//LRP6//RABEP1//M6PR//VLDLR//FNTA//HTRA2//VPS33B//SNCA//KATNB1//RAB5C//AKTIP//NAGPA//FBXW7//CDC25A//MAP2K1//CDC23//CEP164//WAPAL//LATS2//PBK//FSD1//NEK9//FGFR2/…
GO:0034613	cellular protein localization	Biological process	37	798	410	14742	1.66714	0.00160474	0.0359969	2.79459	TRIP11//BCL6//BBC3//IPO7//KATNB1//YWHAQ//NLGN1//KPNA2//TAOK2//NAGPA//AP2A1//CTSA//STX5//AP1M1//EXPH5//SNX13//TNPO2//SAR1B//SYTL2//SYTL4//PEX5L//PEX13//DERL2//SMAD7//DIAPH1//GNAQ//BAMBI//WNT3A//EDA//LRP4//DUSP16//TCF7L2//WFS1//WAPAL//EPHA2//CDC42//LATS2
GO:0001568	blood vessel development	Biological process	24	446	410	14742	1.93486	0.00161693	0.0360788	2.79131	FGFR2//IL8//TGFBI//VEGFA//SH2D2A//HAND1//SOX17//NFATC3//EPHA2//RASA1//ZFPM2//BAI3//KRIT1//TIE1//WNT7A//TFAP2B//EGLN1//IL1A//DDAH1//ANGPTL4//SMAD7//MAP2K1//CRKL//TCF7L2
GO:0044257	cellular protein catabolic process	Biological process	22	395	410	14742	2.00262	0.00162769	0.0360788	2.78843	MAP3K1//SIAH1//ARIH2//UBE2B//UBE2H//UCHL1//CUL2//CDC23//USP34//USP19//FBXL4//USP53//USP47//USP46//USP27X//HTRA2//WFS1//DERL2//PSMD7//FBXW7//SMAD7//PCBP2
GO:0019941	modification-dependent protein catabolic process	Biological process	21	370	410	14742	2.04075	0.0016394	0.0360788	2.78532	MAP3K1//SIAH1//ARIH2//UBE2B//UBE2H//UCHL1//CUL2//CDC23//USP34//USP19//FBXL4//USP53//USP47//USP46//USP27X//WFS1//DERL2//PSMD7//FBXW7//SMAD7//PCBP2
GO:0043410	positive regulation of MAPK cascade	Biological process	12	159	410	14742	2.71367	0.00164225	0.0360788	2.78456	TAOK2//TAOK3//CDC42//IL1A//MAP3K11//WNT7A//ZNF622//ESR1//FGFR2//ST5//FBXW7//WWC1
GO:0070727	cellular macromolecule localization	Biological process	37	802	410	14742	1.65882	0.00175033	0.038256	2.75688	TRIP11//BCL6//BBC3//IPO7//KATNB1//YWHAQ//NLGN1//KPNA2//TAOK2//NAGPA//AP2A1//CTSA//STX5//AP1M1//EXPH5//SNX13//TNPO2//SAR1B//SYTL2//SYTL4//PEX5L//PEX13//DERL2//CDC42//LATS2//WNT3A//SMAD7//DIAPH1//GNAQ//BAMBI//EDA//LRP4//DUSP16//TCF7L2//WFS1//WAPAL//EPHA2
GO:0007626	locomotory behavior	Biological process	10	119	410	14742	3.02152	0.00178269	0.0387644	2.74892	SCN8A//UCHL1//HTRA2//APP//SNCA//SNCG//TNR//CACNA1E//PEX13//RELN
GO:0048589	developmental growth	Biological process	16	251	410	14742	2.29202	0.00180799	0.0388317	2.7428	CCNE1//ESR1//SALL4//CARM1//WNT7A//ARIH2//APP//NDN//OMG//NTRK3//TNR//WNT3A//LRP4//FGFR2//KIF26B//LRP6
GO:0043632	modification-dependent macromolecule catabolic process	Biological process	21	373	410	14742	2.02434	0.00180866	0.0388317	2.74264	MAP3K1//SIAH1//ARIH2//UBE2B//UBE2H//UCHL1//CUL2//CDC23//USP34//USP19//FBXL4//USP53//USP47//USP46//USP27X//WFS1//DERL2//PSMD7//FBXW7//SMAD7//PCBP2
GO:0006950	response to stress	Biological process	101	2773	410	14742	1.30962	0.00181312	0.0388317	2.74157	CHEK1//UCP2//XPC//ZFYVE26//IL1A//CACNA1E//RHOC//KCNMA1//SLC6A4//UBE2B//VEGFA//ANGPTL4//EGLN1//IKBKB//MAP3K1//MAP2K1//HSPA4L//DERL2//KCNN4//SOCS6//CD163//ACTN1//APP//ATP2A2//CDC42//CRK//GGCX//GNAQ//IRF1//PDE3B//PLAT//SOS1//STXBP3//WEE1//ZFPM2//BRPF3//NONO//CEP164//TAOK3//C11ORF30//SHPRH//USP47//IL8//NFATC3//ATRN//PXK//FAIM3//BCL6//TAOK2//YAP1//SESN1//WAC//FBXW7//PSMD7//PCBP4//RFWD2//TPM4//WFS1//HD…
GO:0051325	interphase	Biological process	22	399	410	14742	1.98254	0.00184662	0.0393515	2.73362	CDKN1C//MAP3K11//TCF3//CDC23//CCNE1//CDC25A//MCM3//PPP6C//PSMD7//WEE1//CUL2//LATS2//APP//KPNA2//CHEK1//PPP2R1A//TUBA1A//CEP164//USP47//BCL6
GO:0040011	locomotion	Biological process	48	1123	410	14742	1.53686	0.00187518	0.0397613	2.72696	ZEB2//NDN//NTRK3//PEX13//RELN//PHOX2B//VEGFA//IL8//MAP2K1//AP2A1//RHOC//CDC42//SCN1B//SCN8A//SIAH1//SOS1//SPTBN2//TNR//RANBP9//STIP1//DPYSL5//RGMA//SEMA6D//WNT3A//PPAP2A//ALOX12//KRIT1//PKN2//APP//TAOK2//ABI2//WWC1//BAMBI//MYO18A//LRP6//CACNA1E//LAMA3//MAP3K1//ROR2//SMAD7//TIE1//NISCH//WNT7A//SNCA//BVES//SOX17//EPHA2//NFIB
GO:0034645	cellular macromolecule biosynthetic process	Biological process	133	3839	410	14742	1.24568	0.00199446	0.0419095	2.70017	CDC25A//CHEK1//MCM3//NFIB//CCNE1//BCL6//CDKN1C//EZH1//FGFR2//HIVEP1//SMAD7//PTH//TCF7L2//TFAP2B//TLE4//MBD2//HAND1//NCOR2//SPEN//ZFPM2//SALL4//SOX17//CCNT2//IRF1//MLL//NFATC3//ARID4A//TBP//RDBP//COPS2//TRIP11//AFF4//TH1L//POLR3G//TFAM//PPP2R1A//SIRT4//ESR1//MLF1//TCF3//MYNN//RSF1//RUNX1T1//ELAVL2//FLI1//HDGF//NDN//NONO//POU3F1//PKN2//TARBP2//TMPO//ZFX//JRKL//PHOX2B//DENND4A//YAP1//CARM1//WWC1//KC…
GO:0016043	cellular component organization	Biological process	131	3772	410	14742	1.24874	0.00199616	0.0419095	2.6998	SON//WEE1//RCC2//XPC//BCL6//RELN//TAOK2//SOX17//BBC3//WNT3A//ASF1B//RSF1//TSPYL2//TSPYL5//SHPRH//ACTN1//CDC42//DIAPH1//NISCH//FGD4//FGD5//ABI2//VAMP8//CHEK1//UBE2B//TFAM//MLL//PPP2R1A//RANBP9//AP2A1//APP//LRP2//LRP4//LRP6//RABEP1//M6PR//VLDLR//FNTA//HTRA2//VPS33B//SNCA//KATNB1//RAB5C//AKTIP//NAGPA//FBXW7//CDC25A//MAP2K1//CDC23//CEP164//WAPAL//LATS2//PBK//FSD1//NEK9//FGFR2//PAK3//NUMBL//SLITRK3//R…
GO:0046328	regulation of JNK cascade	Biological process	10	121	410	14742	2.97158	0.00201883	0.0421777	2.6949	MAP3K11//WNT7A//MAP3K2//FGD4//ZEB2//TAOK3//CDC42//IL1A//TAOK2//ZNF622
GO:0032879	regulation of localization	Biological process	49	1157	410	14742	1.52277	0.00203079	0.0422205	2.69234	SNCA//P2RX4//WNT3A//VEGFA//CACNA1E//TFAP2B//ALOX12//KRIT1//FKBP1B//FBXW7//SNCG//PTH//TRPV6//RAB5C//LAMA3//MAP3K1//RHOC//ROR2//MAP2K1//SMAD7//TIE1//NISCH//TCF7L2//MLL//GNAQ//BAMBI//EDA//PXK//EPHA2//EXPH5//SYTL4//STXBP3//ENPP1//PDE3B//SIRT4//KCNN4//IL1A//BBC3//ACTN1//BCL6//DIAPH1//PEX5L//CAMK2G//WFS1//CDC42//WAPAL//IL8//SCN1B//PKN2
GO:0045860	positive regulation of protein kinase activity	Biological process	22	403	410	14742	1.96286	0.00209016	0.0432441	2.67982	CRK//MAP3K1//MAP2K1//TAOK2//MAP3K11//PAK3//MAP3K2//FBXW7//HDGF//IL8//WFS1//TSPYL2//PPAP2A//ZFP91//WNT7A//FGD4//VEGFA//ZEB2//WNT3A//SNCA//RELN//VLDLR
GO:0042326	negative regulation of phosphorylation	Biological process	8	83	410	14742	3.46565	0.00213609	0.0437622	2.67038	LRP6//SMAD7//ENPP1//UBE2B//IRF1//PPP2R1A//SOCS1//CDKN1C
GO:0009059	macromolecule biosynthetic process	Biological process	135	3913	410	14742	1.2405	0.00213805	0.0437622	2.66998	CDC25A//CHEK1//MCM3//NFIB//CCNE1//BCL6//CDKN1C//EZH1//FGFR2//HIVEP1//SMAD7//PTH//TCF7L2//TFAP2B//TLE4//MBD2//HAND1//NCOR2//SPEN//ZFPM2//SALL4//SOX17//CCNT2//IRF1//MLL//NFATC3//ARID4A//TBP//RDBP//COPS2//TRIP11//AFF4//TH1L//POLR3G//TFAM//PPP2R1A//SIRT4//ESR1//MLF1//TCF3//MYNN//RSF1//RUNX1T1//ELAVL2//FLI1//HDGF//NDN//NONO//POU3F1//PKN2//TARBP2//TMPO//ZFX//JRKL//PHOX2B//DENND4A//YAP1//CARM1//WWC1//KC…
GO:2000027	regulation of organ morphogenesis	Biological process	10	122	410	14742	2.94722	0.00214601	0.0437622	2.66837	WNT3A//CARM1//SOX17//ROR2//FGFR2//ESR1//LRP6//VEGFA//FBXW7//NFIB
GO:0048858	cell projection morphogenesis	Biological process	30	617	410	14742	1.74827	0.00217845	0.0442121	2.66185	APP//FGFR2//PAK3//NUMBL//SLITRK3//WNT3A//AP2A1//RHOC//CDC42//MAP2K1//RELN//SCN1B//SCN8A//SIAH1//SOS1//SPTBN2//TNR//RANBP9//STIP1//DPYSL5//RGMA//SEMA6D//UCHL1//NDN//NFIB//OMG//WNT7A//NTRK3//ATXN2//WEE1
GO:0032469	endoplasmic reticulum calcium ion homeostasis	Biological process	3	10	410	14742	10.7868	0.00221518	0.0445335	2.65459	BBC3//APP//WFS1
GO:0046426	negative regulation of JAK-STAT cascade	Biological process	3	10	410	14742	10.7868	0.00221518	0.0445335	2.65459	IRF1//PPP2R1A//SOCS1
GO:0060415	muscle tissue morphogenesis	Biological process	6	49	410	14742	4.40279	0.00226926	0.0454066	2.64411	ZFPM2//EGLN1//FGFR2//SMAD7//HAND1//LRP6
GO:0008283	cell proliferation	Biological process	57	1407	410	14742	1.45664	0.00240013	0.0478007	2.61976	SALL4//IL15//KRIT1//VEGFA//FGFR2//LRP6//CARM1//NUMBL//ALOX12//ODC1//PGGT1B//TFAP2B//DNAJA2//BAMBI//DERL2//TSPYL5//WNT3A//BCL6//CDKN1C//IL1A//IL8//NDN//NFIB//ROR2//MAP2K1//CUL2//PPAP2A//PHOX2B//GDF11//TMEM115//SESN1//CASK//WNT7A//ZEB2//SLC6A4//TCF3//EPHA2//FKBP1B//ESRRA//MBD2//CDCA7//IMPDH1//ESR1//TCF7L2//CDC42//ARIH2//SOX17//FBXW7//CDC25A//HDGF//LRP2//MAP3K11//RASGRF1//TGFBI//UCHL1//YAP1//TUSC2
GO:0070647	protein modification by small protein conjugation or removal	Biological process	25	487	410	14742	1.8458	0.00246427	0.0488498	2.60831	MAP3K1//PSMD7//UBE2B//ARIH2//MARCH8//SIAH1//UBE2H//BRAP//CDC23//FBXL2//FBXW7//RNF130//RNF213//COPS2//WAC//UCHL1//USP19//USP46//SMAD7//WFS1//TSPYL5//USP47//UBE2E2//ZFP91//USP34
GO:0032501	multicellular organismal process	Biological process	172	5201	410	14742	1.18909	0.00267104	0.0527035	2.57332	WNT7A//EPHA2//GNAQ//ROR2//PTH//GDF11//FGFR2//IL8//TGFBI//VEGFA//SH2D2A//HAND1//SOX17//EIF2B5//CCNE1//ESR1//CRKL//TCF7L2//NFATC3//RASA1//ZFPM2//WNT3A//SLC5A1//APH1A//SMAD7//IL1A//CACNA1E//TIE1//UBE2B//PITPNB//SALL4//LRP6//DUSP2//ZEB2//NDN//NTRK3//PEX13//RELN//PHOX2B//TCF3//AGPAT1//KCNJ8//LRP4//ODC1//TFAP2B//WFS1//AQP11//STOX2//P2RX4//FBXW7//SNCA//NFIB//NLGN1//TSHZ3//MLF1//CORIN//MAP2K1//DDAH1//HAS…
GO:0032990	cell part morphogenesis	Biological process	30	626	410	14742	1.72314	0.00270095	0.0530481	2.56848	APP//FGFR2//PAK3//NUMBL//SLITRK3//WNT3A//AP2A1//RHOC//CDC42//MAP2K1//RELN//SCN1B//SCN8A//SIAH1//SOS1//SPTBN2//TNR//RANBP9//STIP1//DPYSL5//RGMA//SEMA6D//UCHL1//NDN//NFIB//OMG//WNT7A//NTRK3//ATXN2//WEE1
GO:0042391	regulation of membrane potential	Biological process	13	193	410	14742	2.42191	0.00294224	0.0575221	2.53132	GNAQ//SCN1B//POU3F1//P2RX4//KCNN4//SCN8A//EIF2B5//CACNA1E//ALOX12//SNCA//SMAD7//NLGN1//KCNMA1
GO:0050896	response to stimulus	Biological process	214	6691	410	14742	1.14999	0.00296469	0.0576964	2.52802	CHEK1//MAP3K1//PAK3//MAP2K1//BRAP//TAOK3//NLK//MAP3K11//MAP3K2//DUSP2//PPP2R1A//DUSP16//UCP2//XPC//ZFYVE26//IL1A//CACNA1E//RHOC//KCNMA1//SLC6A4//UBE2B//VEGFA//ANGPTL4//EGLN1//AGPAT1//APP//PEX13//IKBKB//IL8//BCL6//WNT3A//SOX17//HSPA4L//DERL2//KCNN4//SOCS6//CD163//ODC1//PCBP2//POLR3G//ACTN1//ATP2A2//CDC42//CRK//GGCX//GNAQ//IRF1//PDE3B//PLAT//SOS1//STXBP3//WEE1//ZFPM2//BRPF3//C1QA//CCNE1//LRP6//TCF7…
GO:0033138	positive regulation of peptidyl-serine phosphorylation	Biological process	5	36	410	14742	4.9939	0.00300796	0.0582724	2.52173	ARAF//CDC42//SNCA//VEGFA//WNT3A
GO:0045665	negative regulation of neuron differentiation	Biological process	6	52	410	14742	4.14878	0.00308112	0.0590162	2.51129	APP//RHOC//SLC6A4//PHOX2B//GDF11//CTDSP1
GO:0010563	negative regulation of phosphorus metabolic process	Biological process	8	88	410	14742	3.26874	0.0030879	0.0590162	2.51034	LRP6//SMAD7//ENPP1//UBE2B//CDKN1C//IRF1//PPP2R1A//SOCS1
GO:0045936	negative regulation of phosphate metabolic process	Biological process	8	88	410	14742	3.26874	0.0030879	0.0590162	2.51034	LRP6//SMAD7//ENPP1//UBE2B//CDKN1C//IRF1//PPP2R1A//SOCS1
GO:0030163	protein catabolic process	Biological process	24	469	410	14742	1.83997	0.00310746	0.0591122	2.50759	MAP3K1//SIAH1//ARIH2//UBE2B//UBE2H//UCHL1//CUL2//CDC23//USP34//USP19//FBXL4//USP53//USP47//USP46//USP27X//HTRA2//WFS1//DERL2//PSMD7//FBXW7//SMAD7//CDC42//PCBP2//SOX17
GO:0044092	negative regulation of molecular function	Biological process	31	660	410	14742	1.68885	0.00312066	0.0591122	2.50575	DUSP2//PPP2R1A//DUSP16//GNAQ//LRP6//TARBP2//SYTL2//CARM1//SNCA//FKBP1B//PXK//CDKN1C//WAPAL//SOCS1//ANGPTL4//TFAP2B//USP47//NFIB//RSF1//SMPD1//UCHL1//ESR1//SMAD7//TCF7L2//WFS1//HAND1//EGLN1//LATS2//PSMD7//CDC23//RHOC
GO:0051403	stress-activated MAPK cascade	Biological process	13	195	410	14742	2.39707	0.00321532	0.0606358	2.49278	CRKL//MAP3K11//ROR2//WNT7A//MAP3K2//FGD4//MAP2K1//TAOK2//TAOK3//ZEB2//CDC42//IL1A//ZNF622
GO:0007411	axon guidance	Biological process	19	341	410	14742	2.00342	0.00328887	0.0617496	2.48295	APP//WNT3A//NFIB//AP2A1//RHOC//CDC42//MAP2K1//RELN//SCN1B//SCN8A//SIAH1//SOS1//SPTBN2//TNR//RANBP9//STIP1//DPYSL5//RGMA//SEMA6D
GO:0008344	adult locomotory behavior	Biological process	6	53	410	14742	4.0705	0.00339468	0.0634567	2.4692	SCN8A//UCHL1//HTRA2//APP//SNCA//SNCG
GO:0070534	protein K63-linked ubiquitination	Biological process	4	23	410	14742	6.25323	0.00343194	0.063873	2.46446	UBE2B//UBE2E2//ARIH2//ZFP91
GO:0048514	blood vessel morphogenesis	Biological process	21	394	410	14742	1.91644	0.00346236	0.064159	2.46063	FGFR2//IL8//TGFBI//VEGFA//SH2D2A//HAND1//SOX17//NFATC3//EPHA2//RASA1//ZFPM2//BAI3//KRIT1//TIE1//WNT7A//TFAP2B//EGLN1//IL1A//DDAH1//ANGPTL4//SMAD7
GO:0032319	regulation of Rho GTPase activity	Biological process	8	90	410	14742	3.1961	0.00354984	0.0652446	2.44979	BVES//SOS1//EPHA2//RASGRF1//FGD4//FGD5//BCL6//CRK
GO:0007017	microtubule-based process	Biological process	20	369	410	14742	1.94884	0.00355156	0.0652446	2.44958	KPNA2//SON//WEE1//TUBA1A//KIF1B//KIF26B//KIF21A//RANBP9//KATNB1//UBE2B//APP//UCHL1//SNCA//DIAPH1//CHEK1//MAP2K1//CDC42//PEX13//WNT3A//MAP3K11
GO:0048011	nerve growth factor receptor signaling pathway	Biological process	14	221	410	14742	2.27776	0.00361017	0.0660367	2.44247	AP2A1//CRK//IKBKB//NDN//OMG//MAP2K1//RALGDS//RASGRF1//ITSN1//SOS1//ARHGEF3//APH1A//PSENEN//FGD4
GO:0045444	fat cell differentiation	Biological process	9	111	410	14742	2.91536	0.00378928	0.068809	2.42144	LRP6//ENPP1//ZFPM2//WNT3A//CARM1//RUNX1T1//TCF7L2//TFAP2B//SOCS1
GO:0006996	organelle organization	Biological process	72	1904	410	14742	1.35968	0.00379402	0.068809	2.4209	SON//WEE1//RCC2//XPC//BBC3//ASF1B//RSF1//TSPYL2//TSPYL5//SHPRH//ACTN1//CDC42//BCL6//DIAPH1//TAOK2//NISCH//FGD4//FGD5//ABI2//VAMP8//CHEK1//UBE2B//TFAM//HTRA2//SNCA//RANBP9//KATNB1//RAB5C//AKTIP//NAGPA//FBXW7//CDC25A//MAP2K1//CDC23//CEP164//WAPAL//LATS2//PBK//FSD1//NEK9//RHOC//MAP3K1//WAC//SETD3//PEX5L//PEX13//EZH1//MLL//CARM1//SS18L1//BRPF3//ING3//C11ORF30//MLL3//SUV420H2//PAK3//RASA1//CNN1//MYO18…
GO:0032318	regulation of Ras GTPase activity	Biological process	11	154	410	14742	2.56829	0.00386982	0.069483	2.41231	SMAP1//BVES//BCL6//CRK//MAP2K1//RASA1//RASGRF1//SOS1//EPHA2//FGD4//FGD5
GO:0051098	regulation of binding	Biological process	11	154	410	14742	2.56829	0.00386982	0.069483	2.41231	CARM1//KRIT1//TCF7L2//BAMBI//AKTIP//WNT3A//WAPAL//NFIB//RSF1//CDC42//RUNX1T1
GO:0048679	regulation of axon regeneration	Biological process	3	12	410	14742	8.98902	0.0038964	0.069483	2.40934	OMG//NTRK3//TNR
GO:0070570	regulation of neuron projection regeneration	Biological process	3	12	410	14742	8.98902	0.0038964	0.069483	2.40934	OMG//NTRK3//TNR
GO:0003401	axis elongation	Biological process	4	24	410	14742	5.99268	0.00402916	0.0715512	2.39479	FGFR2//ESR1//LRP6//WNT3A
GO:0010605	negative regulation of macromolecule metabolic process	Biological process	46	1108	410	14742	1.49276	0.00405264	0.0716695	2.39226	BCL6//CDKN1C//EZH1//FGFR2//HIVEP1//SMAD7//NFIB//PTH//TCF7L2//TFAP2B//TLE4//MBD2//HAND1//NCOR2//SPEN//ZFPM2//SALL4//SOX17//LRP6//SIRT4//UBE2B//WAPAL//TSPYL2//CDC42//ESR1//ARID4A//DEDD//YWHAQ//TH1L//RSF1//USP47//TSHZ3//HMBOX1//KCTD1//TARBP2//ENPP1//EIF2B5//FBXW7//SNCA//IRF1//PPP2R1A//SOCS1//MARCH8//PLAT//PSMD7//CDC23
GO:0048644	muscle organ morphogenesis	Biological process	6	55	410	14742	3.92248	0.00409224	0.0720707	2.38804	ZFPM2//EGLN1//FGFR2//SMAD7//HAND1//LRP6
GO:0048878	chemical homeostasis	Biological process	33	732	410	14742	1.62097	0.00436528	0.0765631	2.35999	GNAQ//TFAP2B//WFS1//SCN1B//GPR12//PTH//APP//GPR6//POU3F1//P2RX4//FKBP1B//SLC22A17//KCNMA1//KCNN4//ENPP1//EGLN1//BBC3//SCN8A//EIF2B5//CACNA1E//PDE3B//TCF7L2//CRTC2//VEGFA//AQP11//DIAPH1//SNCA//ALOX12//FBXW7//SMAD7//HAS2//ANGPTL4//NLGN1
GO:0006479	protein methylation	Biological process	7	74	410	14742	3.40125	0.00443524	0.0768414	2.35308	SETD3//CARM1//MLL3//SUV420H2//EZH1//MLL//PCMT1
GO:0007162	negative regulation of cell adhesion	Biological process	7	74	410	14742	3.40125	0.00443524	0.0768414	2.35308	BCL6//RASA1//CASK//TNR//PDE3B//MAP2K1//TGFBI
GO:0008213	protein alkylation	Biological process	7	74	410	14742	3.40125	0.00443524	0.0768414	2.35308	PCMT1//SETD3//CARM1//MLL3//SUV420H2//EZH1//MLL
GO:0061351	neural precursor cell proliferation	Biological process	7	75	410	14742	3.3559	0.00477782	0.0824416	2.32077	NUMBL//WNT7A//ZEB2//WNT3A//FGFR2//LRP6//SLC6A4
GO:0007420	brain development	Biological process	22	433	410	14742	1.82687	0.00494036	0.0835844	2.30624	PHOX2B//LRP6//NUMBL//ATXN2//WNT7A//NFIB//ZEB2//WNT3A//FGFR2//SLC6A4//PEX13//EMX1//RELN//GNAQ//LHX8//VLDLR//TNR//APP//LRP2//POU3F1//HTRA2//TCF7L2
GO:0018205	peptidyl-lysine modification	Biological process	10	137	410	14742	2.62453	0.00495343	0.0835844	2.30509	EZH1//SUV420H2//SETD3//SNCA//TCF3//PHF15//BRPF3//ING3//MLL//CHEK1
GO:0021537	telencephalon development	Biological process	10	137	410	14742	2.62453	0.00495343	0.0835844	2.30509	NUMBL//ZEB2//WNT3A//LRP6//PEX13//EMX1//RELN//NFIB//VLDLR//TNR
GO:0003254	regulation of membrane depolarization	Biological process	3	13	410	14742	8.29756	0.00496172	0.0835844	2.30437	ALOX12//SMAD7//SCN1B
GO:0014888	striated muscle adaptation	Biological process	3	13	410	14742	8.29756	0.00496172	0.0835844	2.30437	IL15//USP19//CAMK2G
GO:0021903	rostrocaudal neural tube patterning	Biological process	3	13	410	14742	8.29756	0.00496172	0.0835844	2.30437	LRP6//WNT3A//SOX17
GO:0007169	transmembrane receptor protein tyrosine kinase signaling pathway	Biological process	28	598	410	14742	1.68356	0.00507676	0.0848515	2.29441	FBXW7//AP2A1//CDC42//MAP2K1//SOS1//APP//CRK//FGFR2//PDE3B//PPP2R1A//SNCA//VEGFA//ESR1//ENPP1//SOCS1//IKBKB//NDN//OMG//RALGDS//RASGRF1//ITSN1//ARHGEF3//APH1A//PSENEN//FGD4//EPHA2//NTRK3//ROR2
GO:0060548	negative regulation of cell death	Biological process	28	598	410	14742	1.68356	0.00507676	0.0848515	2.29441	BCL6//ALOX12//IKBKB//IL1A//SNCA//SON//TCF7L2//VEGFA//FAIM3//MYO18A//LRP6//FGFR2//ARAF//TFAP2B//UBE2B//WFS1//WNT7A//ANGPTL4//USP47//RASA1//ITSN1//RTKN//SERBP1//SMAD7//ESR1//KRIT1//NTRK3//ZFPM2
GO:0007270	neuron-neuron synaptic transmission	Biological process	7	76	410	14742	3.31175	0.00513997	0.0855724	2.28904	SLC6A4//NISCH//USP46//SNCA//TNR//NLGN1//KIF1B
GO:0006887	exocytosis	Biological process	15	255	410	14742	2.11506	0.0052549	0.0867051	2.27944	ACTN1//APP//VEGFA//BRPF3//NLGN1//STXBP3//VPS33B//SYTL2//TRIM36//TRPV6//PEX5L//SNCA//EXPH5//SYTL4//STXBP5L
GO:0045595	regulation of cell differentiation	Biological process	37	857	410	14742	1.55236	0.00526176	0.0867051	2.27887	WNT3A//FGFR2//BAMBI//SMAD7//KATNB1//TNR//WNT7A//IL15//SOX17//BCL6//TCF7L2//CCNE1//MAP2K1//LRP6//ENPP1//ZFPM2//CARM1//ALOX12//GNAQ//SMAP1//MBNL3//NLGN1//APP//RHOC//SLC6A4//PHOX2B//GDF11//CTDSP1//TCF3//ESRRA//OMG//NTRK3//NUMBL//SPEN//CDC42//PPP2R1A//TFAP2B
GO:0010564	regulation of cell cycle process	Biological process	21	409	410	14742	1.84616	0.00529835	0.0867051	2.27586	CDC25A//CHEK1//MCM3//PSMD7//WEE1//XPC//CDC23//WAC//RFWD2//PCBP4//CDC42//UBE2B//USP47//TAOK2//TAOK3//FBXW7//BCL6//IL1A//WAPAL//PKN2//USP19
GO:0001655	urogenital system development	Biological process	14	231	410	14742	2.17916	0.00532965	0.0867051	2.2733	SLC5A1//GDF11//APH1A//KCNJ8//LRP4//ODC1//TFAP2B//VEGFA//WFS1//AQP11//FGFR2//ESR1//SOX17//KIF26B
GO:0071478	cellular response to radiation	Biological process	6	58	410	14742	3.7196	0.00532987	0.0867051	2.27328	CHEK1//CDC25A//USP47//FBXW7//YAP1//TSPYL5
GO:0030705	cytoskeleton-dependent intracellular transport	Biological process	5	41	410	14742	4.38489	0.00533906	0.0867051	2.27254	APP//KIF1B//UCHL1//MAP2K1//TUBA1A
GO:0051093	negative regulation of developmental process	Biological process	22	436	410	14742	1.8143	0.00535041	0.0867051	2.27161	WNT3A//SMAD7//WNT7A//BAI3//KRIT1//TIE1//SOX17//BCL6//LRP6//ENPP1//ZFPM2//MBNL3//APP//RHOC//SLC6A4//PHOX2B//GDF11//CTDSP1//USP19//TNR//NTRK3//OMG
GO:0034644	cellular response to UV	Biological process	4	26	410	14742	5.53171	0.00542629	0.0869431	2.2655	CHEK1//CDC25A//USP47//FBXW7
GO:0045599	negative regulation of fat cell differentiation	Biological process	4	26	410	14742	5.53171	0.00542629	0.0869431	2.2655	LRP6//ENPP1//ZFPM2//WNT3A
GO:0070979	protein K11-linked ubiquitination	Biological process	4	26	410	14742	5.53171	0.00542629	0.0869431	2.2655	UBE2B//UBE2E2//UBE2H//CDC23
GO:0003231	cardiac ventricle development	Biological process	7	77	410	14742	3.26874	0.00552235	0.0881101	2.25788	FGFR2//HAND1//ZFPM2//SALL4//SMAD7//EGLN1//LRP6
GO:0080134	regulation of response to stress	Biological process	29	630	410	14742	1.65512	0.00554047	0.0881101	2.25645	IKBKB//MAP3K1//MAP2K1//MAP3K11//WNT7A//MAP3K2//FGD4//CHEK1//TAOK2//TAOK3//PLAT//ZEB2//POLR3G//CDC42//IL1A//ZNF622//OMG//NTRK3//TNR//PCBP2//TARBP2//AP2A1//AP1M1//IL15//BCL6//SOCS1//CASK//USP19//KIAA1324
GO:0046907	intracellular transport	Biological process	43	1038	410	14742	1.48951	0.00562171	0.0890696	2.25013	TRIP11//BCL6//IPO7//KATNB1//YWHAQ//NLGN1//KPNA2//TAOK2//NAGPA//UCP2//AP2A1//CTSA//STX5//AP1M1//EXPH5//SNX13//TNPO2//SAR1B//SYTL2//SYTL4//VAMP8//UPF3A//APP//KIF1B//M6PR//AKTIP//FKBP1B//PEX5L//PEX13//UCHL1//TUBA1A//DERL2//GNAQ//BAMBI//WNT3A//EDA//DUSP16//TCF7L2//MAP2K1//ATP2A2//WFS1//LRP6//RANBP3
GO:0051402	neuron apoptosis	Biological process	11	162	410	14742	2.44146	0.00565643	0.0892878	2.24746	RASA1//ITSN1//SNCA//WFS1//RHOC//MAP3K11//TFAP2B//ESR1//GABRB3//APP//SIAH1
GO:0072358	cardiovascular system development	Biological process	31	689	410	14742	1.61776	0.00581798	0.0911627	2.23523	FGFR2//IL8//TGFBI//VEGFA//SH2D2A//HAND1//SOX17//CRKL//EPHA2//TCF7L2//NFATC3//RASA1//ZFPM2//FBXW7//LRP6//WNT3A//SALL4//GNAQ//KCNJ8//VLDLR//BAI3//KRIT1//TIE1//WNT7A//TFAP2B//EGLN1//IL1A//DDAH1//ANGPTL4//SMAD7//MAP2K1
GO:0072359	circulatory system development	Biological process	31	689	410	14742	1.61776	0.00581798	0.0911627	2.23523	FGFR2//IL8//TGFBI//VEGFA//SH2D2A//HAND1//SOX17//CRKL//EPHA2//TCF7L2//NFATC3//RASA1//ZFPM2//FBXW7//LRP6//WNT3A//SALL4//GNAQ//KCNJ8//VLDLR//BAI3//KRIT1//TIE1//WNT7A//TFAP2B//EGLN1//IL1A//DDAH1//ANGPTL4//SMAD7//MAP2K1
GO:0048588	developmental cell growth	Biological process	7	78	410	14742	3.22683	0.00592564	0.0925095	2.22726	APP//NDN//OMG//NTRK3//TNR//WNT3A//ARIH2
GO:0007417	central nervous system development	Biological process	28	606	410	14742	1.66134	0.00605896	0.0942456	2.2176	EMX1//RELN//SLC6A4//TCF7L2//EIF2B5//GDF11//VLDLR//WNT3A//PHOX2B//LRP6//NUMBL//ATXN2//WNT7A//NFIB//ZEB2//FGFR2//PEX13//GNAQ//LHX8//TNR//APP//LRP2//POU3F1//HTRA2//NTRK3//NDN//TIMP4//JRKL
GO:0007167	enzyme linked receptor protein signaling pathway	Biological process	35	807	410	14742	1.55943	0.00613914	0.0951455	2.21189	NTRK3//ROR2//FBXW7//AP2A1//CDC42//MAP2K1//SOS1//APP//FNTA//SMAD7//MAP3K1//NLK//CRK//FGFR2//PDE3B//PPP2R1A//SNCA//TFAP2B//CDKN1C//BAMBI//VEGFA//ESR1//ENPP1//SOCS1//IKBKB//NDN//OMG//RALGDS//RASGRF1//ITSN1//ARHGEF3//APH1A//PSENEN//FGD4//EPHA2
GO:0003091	renal water homeostasis	Biological process	3	14	410	14742	7.70488	0.00618594	0.0951787	2.20859	HAS2//TFAP2B//WFS1
GO:0035121	tail morphogenesis	Biological process	3	14	410	14742	7.70488	0.00618594	0.0951787	2.20859	EPHA2//LRP6//WNT3A
GO:0001570	vasculogenesis	Biological process	6	60	410	14742	3.59561	0.00629438	0.0960649	2.20105	WNT7A//EPHA2//RASA1//VEGFA//ZFPM2//SOX17
GO:0051128	regulation of cellular component organization	Biological process	44	1075	410	14742	1.47169	0.00630903	0.0960649	2.20004	TAOK2//WNT3A//KATNB1//CDC42//CDC23//RHOC//DIAPH1//RASA1//VEGFA//BVES//BAMBI//FBLIM1//FGD4//FGD5//EPHA2//SMAD7//TNR//RAB5C//ALOX12//DERL2//USP47//BCL6//ENPP1//PPP2R1A//TSPYL2//SOX17//PAK3//MAP3K1//UBE2B//SNCA//WNT7A//BBC3//CRK//KIAA1324//TCF7L2//CHEK1//IL1A//WAPAL//OMG//NTRK3//NUMBL//SPTBN2//NLGN1//MAP2K1
GO:0008624	induction of apoptosis by extracellular signals	Biological process	9	120	410	14742	2.69671	0.00631116	0.0960649	2.19989	DEDD//PTH//RASGRF1//ITSN1//SOS1//ARHGEF3//APH1A//PSENEN//FGD4
GO:0043393	regulation of protein binding	Biological process	7	79	410	14742	3.18598	0.00635054	0.0963203	2.19719	CARM1//KRIT1//TCF7L2//BAMBI//AKTIP//WNT3A//CDC42
GO:0072001	renal system development	Biological process	12	188	410	14742	2.29507	0.0064114	0.0968733	2.19305	SLC5A1//GDF11//APH1A//KCNJ8//LRP4//ODC1//TFAP2B//VEGFA//WFS1//AQP11//KIF26B//SOX17
GO:0006886	intracellular protein transport	Biological process	29	637	410	14742	1.63693	0.00643246	0.0968733	2.19162	TRIP11//BCL6//IPO7//KATNB1//YWHAQ//NLGN1//KPNA2//TAOK2//NAGPA//PEX5L//PEX13//DERL2//GNAQ//BAMBI//WNT3A//EDA//DUSP16//TCF7L2//WFS1//AP2A1//CTSA//STX5//AP1M1//EXPH5//SNX13//TNPO2//SAR1B//SYTL2//SYTL4
GO:0070997	neuron death	Biological process	11	166	410	14742	2.38263	0.0067654	0.101529	2.16971	RASA1//ITSN1//SNCA//WFS1//RHOC//MAP3K11//TFAP2B//ESR1//GABRB3//APP//SIAH1
GO:0009888	tissue development	Biological process	45	1111	410	14742	1.45637	0.00692517	0.103562	2.15957	ROR2//NFATC3//VEGFA//DUSP2//SOX17//HAND1//ZEB2//LRP6//SALL4//LRP4//WNT3A//NFIB//TGFBI//ESR1//ZFPM2//CDC42//CARM1//EDA//HOXC11//TIE1//GDF11//DYRK1B//ATP2A2//LAMA3//POU3F1//KLK7//BAMBI//SMAD7//WNT7A//FGFR2//EPHA2//MAP2K1//LATS2//ENPP1//PTH//IL1A//TFAP2B//ALOX12//MBNL3//USP19//APP//ESRRA//EGLN1//KIF26B
GO:0044057	regulation of system process	Biological process	20	394	410	14742	1.82518	0.00725229	0.108074	2.13953	SNCA//CACNA1E//NLGN1//TSHZ3//MAP2K1//CNN1//FKBP1B//P2RX4//CAMK2G//SLC6A4//NISCH//USP46//RHOC//SNCG//RASGRF1//PXK//TNR//PEX5L//IL1A//SMAD7
GO:0043087	regulation of GTPase activity	Biological process	13	216	410	14742	2.16402	0.00752687	0.11056	2.12339	SMAP1//BVES//BCL6//CRK//MAP2K1//RASA1//RASGRF1//SOS1//EPHA2//FGD4//FGD5//GNAQ//SNX13
GO:0018105	peptidyl-serine phosphorylation	Biological process	8	102	410	14742	2.82009	0.00754173	0.11056	2.12253	NLK//SMAD7//ARAF//CDC42//SNCA//VEGFA//WNT3A//MAP3K1
GO:0045787	positive regulation of cell cycle	Biological process	8	102	410	14742	2.82009	0.00754173	0.11056	2.12253	IL1A//APP//PKN2//FGFR2//LRP6//PGGT1B//SLC6A4//TCF3
GO:0050732	negative regulation of peptidyl-tyrosine phosphorylation	Biological process	3	15	410	14742	7.19122	0.00757474	0.11056	2.12063	IRF1//PPP2R1A//SOCS1
GO:0061311	cell surface receptor signaling pathway involved in heart development	Biological process	3	15	410	14742	7.19122	0.00757474	0.11056	2.12063	WNT3A//SOX17//LRP6
GO:2001244	positive regulation of intrinsic apoptotic signaling pathway	Biological process	3	15	410	14742	7.19122	0.00757474	0.11056	2.12063	SIAH1//BBC3//HTRA2
GO:0046578	regulation of Ras protein signal transduction	Biological process	15	266	410	14742	2.0276	0.00766267	0.111462	2.11562	PSD//PSD3//SMAP1//BVES//BCL6//CRK//MAP2K1//RASA1//RASGRF1//SOS1//EPHA2//ITSN1//ARHGEF3//FGD4//FGD5
GO:0006928	cellular component movement	Biological process	42	1029	410	14742	1.4676	0.00791943	0.114133	2.10131	ZEB2//NDN//NTRK3//PEX13//RELN//PHOX2B//VEGFA//TUBA1A//KIF1B//KIF26B//KIF21A//APP//PPAP2A//ALOX12//KRIT1//PKN2//TAOK2//ABI2//WWC1//BAMBI//MYO18A//UCHL1//LRP6//TNR//TPM4//CACNA1E//LAMA3//MAP3K1//RHOC//ROR2//MAP2K1//SMAD7//TIE1//NISCH//IL8//WNT7A//SOX17//EPHA2//WNT3A//SOS1//ACTN1//BCL6
GO:0030811	regulation of nucleotide catabolic process	Biological process	14	242	410	14742	2.0801	0.00792664	0.114133	2.10091	SMAP1//BVES//BCL6//CRK//MAP2K1//RASA1//RASGRF1//SOS1//PXK//EPHA2//FGD4//FGD5//GNAQ//SNX13
GO:0033121	regulation of purine nucleotide catabolic process	Biological process	14	242	410	14742	2.0801	0.00792664	0.114133	2.10091	SMAP1//BVES//BCL6//CRK//MAP2K1//RASA1//RASGRF1//SOS1//PXK//EPHA2//FGD4//FGD5//GNAQ//SNX13
GO:0033673	negative regulation of kinase activity	Biological process	10	147	410	14742	2.44599	0.00804573	0.115458	2.09443	DUSP2//PPP2R1A//DUSP16//GNAQ//LRP6//TARBP2//SMPD1//UCHL1//LATS2//CDKN1C
GO:0042551	neuron maturation	Biological process	4	29	410	14742	4.95946	0.00807498	0.115489	2.09286	APP//GNAQ//CDKN1C//VSX1
GO:0007266	Rho protein signal transduction	Biological process	12	194	410	14742	2.22409	0.00815748	0.116278	2.08844	RASGRF1//ITSN1//SOS1//ARHGEF3//FGD4//FGD5//BCL6//PTH//RTKN
GO:0033124	regulation of GTP catabolic process	Biological process	13	219	410	14742	2.13438	0.00840552	0.119414	2.07544	SMAP1//BVES//BCL6//CRK//MAP2K1//RASA1//RASGRF1//SOS1//EPHA2//FGD4//FGD5//GNAQ//SNX13
GO:0045596	negative regulation of cell differentiation	Biological process	18	347	410	14742	1.86516	0.00855718	0.121165	2.06767	WNT3A//SMAD7//WNT7A//SOX17//LRP6//ENPP1//ZFPM2//BCL6//MBNL3//APP//RHOC//SLC6A4//PHOX2B//GDF11//CTDSP1//TNR//NTRK3//OMG
GO:0060284	regulation of cell development	Biological process	21	428	410	14742	1.7642	0.00871133	0.122939	2.05992	BAMBI//SMAD7//KATNB1//TNR//WNT3A//WNT7A//TCF7L2//MBNL3//NLGN1//APP//RHOC//SLC6A4//PHOX2B//GDF11//CTDSP1//TCF3//OMG//NTRK3//NUMBL//SPEN//LRP6
GO:0006873	cellular ion homeostasis	Biological process	24	511	410	14742	1.68874	0.00881181	0.123947	2.05493	GNAQ//SCN1B//GPR12//PTH//APP//GPR6//POU3F1//P2RX4//FKBP1B//SLC22A17//KCNMA1//KCNN4//ENPP1//WFS1//BBC3//SCN8A//EIF2B5//AQP11//DIAPH1//SNCA//CACNA1E//ALOX12//SMAD7//NLGN1
GO:0034655	nucleobase-containing compound catabolic process	Biological process	25	540	410	14742	1.66463	0.009024	0.125563	2.0446	RHOC//CDC42//GNAQ//RAB5C//SAR1B//GDA//PDE3B//ACLY//KIF1B//RNF213//DPYSL5//ENPP1//SMAP1//BVES//BCL6//CRK//MAP2K1//RASA1//RASGRF1//SOS1//PXK//EPHA2//FGD4//FGD5//SNX13
GO:0022029	telencephalon cell migration	Biological process	4	30	410	14742	4.79415	0.00911678	0.125563	2.04016	LRP6//PEX13//RELN//TNR
GO:0001953	negative regulation of cell-matrix adhesion	Biological process	3	16	410	14742	6.74177	0.00913291	0.125563	2.03939	BCL6//RASA1//CASK
GO:0055117	regulation of cardiac muscle contraction	Biological process	3	16	410	14742	6.74177	0.00913291	0.125563	2.03939	FKBP1B//SMAD7//P2RX4
GO:0060788	ectodermal placode formation	Biological process	3	16	410	14742	6.74177	0.00913291	0.125563	2.03939	LRP6//CDC42//EDA
GO:0071696	ectodermal placode development	Biological process	3	16	410	14742	6.74177	0.00913291	0.125563	2.03939	LRP6//CDC42//EDA
GO:0071697	ectodermal placode morphogenesis	Biological process	3	16	410	14742	6.74177	0.00913291	0.125563	2.03939	LRP6//CDC42//EDA
GO:0000278	mitotic cell cycle	Biological process	32	742	410	14742	1.55067	0.00931487	0.127569	2.03082	CDKN1C//MAP3K11//TCF3//CDC23//CCNE1//CDC25A//MCM3//PPP6C//PSMD7//WEE1//CUL2//LATS2//APP//KPNA2//CHEK1//PPP2R1A//TUBA1A//CEP164//RCC2//MAP2K1//KATNB1//WAPAL//PBK//FSD1//NEK9//CDC42//USP47//BCL6//IL1A//PKN2
GO:0021543	pallium development	Biological process	7	85	410	14742	2.96109	0.00939187	0.127569	2.02725	ZEB2//WNT3A//LRP6//PEX13//EMX1//RELN//VLDLR
GO:0071901	negative regulation of protein serine/threonine kinase activity	Biological process	7	85	410	14742	2.96109	0.00939187	0.127569	2.02725	DUSP2//PPP2R1A//DUSP16//SMPD1//UCHL1//LATS2//LRP6
GO:0090066	regulation of anatomical structure size	Biological process	14	247	410	14742	2.038	0.00939857	0.127569	2.02694	MAP2K1//RHOC//PAK3//RASA1//MAP3K1//WNT7A//SLC6A4//KCNJ8//P2RX4//OMG//NTRK3//TNR//WNT3A//SPTBN2
GO:0071214	cellular response to abiotic stimulus	Biological process	9	128	410	14742	2.52816	0.00949169	0.128424	2.02266	CHEK1//IRF1//MAP3K1//MAP3K2//CDC25A//USP47//FBXW7//YAP1//TSPYL5
GO:0043066	negative regulation of apoptotic process	Biological process	26	571	410	14742	1.63723	0.00959164	0.129366	2.01811	BCL6//ALOX12//IKBKB//IL1A//SNCA//SON//TCF7L2//VEGFA//FAIM3//MYO18A//LRP6//FGFR2//RASA1//ITSN1//WFS1//RTKN//SERBP1//SMAD7//ESR1//KRIT1//ARAF//TFAP2B//UBE2B//WNT7A//ANGPTL4//USP47
GO:0032535	regulation of cellular component size	Biological process	10	151	410	14742	2.3812	0.0096326	0.129508	2.01626	RHOC//PAK3//RASA1//MAP3K1//WNT7A//OMG//NTRK3//TNR//WNT3A//SPTBN2
GO:0006366	transcription from RNA polymerase II promoter	Biological process	48	1227	410	14742	1.4066	0.0099828	0.133593	2.00075	CCNE1//BCL6//CDKN1C//EZH1//FGFR2//HIVEP1//SMAD7//NFIB//PTH//TCF7L2//TFAP2B//TLE4//MBD2//HAND1//NCOR2//SPEN//ZFPM2//SALL4//SOX17//CRK//MYCN//NFATC3//TARBP2//CTDSP1//ZNF367//TBP//TAF7L//CCNT2//RDBP//TH1L//CHEK1//MAP2K1//APP//ESR1//ESRRA//IL1A//IRF1//LRP6//MLL//TCF3//VEGFA//WNT7A//PHOX2B//WNT3A//ARID4A//COPS2//TRIP11//AFF4
GO:0032940	secretion by cell	Biological process	28	630	410	14742	1.59805	0.00999908	0.133593	2.00004	SNCA//ACTN1//APP//VEGFA//BRPF3//NLGN1//STXBP5L//SYTL2//STXBP3//VPS33B//WNT7A//GLS2//TRIM36//CACNA1E//TFAP2B//SNCG//TRPV6//CAMK2G//FKBP1B//TCF7L2//PEX5L//EXPH5//SYTL4//PDE3B//SIRT4//NISCH//KCNN4//IL1A
GO:0009166	nucleotide catabolic process	Biological process	24	517	410	14742	1.66914	0.0100812	0.134269	1.99649	RHOC//CDC42//GNAQ//RAB5C//SAR1B//GDA//PDE3B//ACLY//KIF1B//RNF213//ENPP1//SMAP1//BVES//BCL6//CRK//MAP2K1//RASA1//RASGRF1//SOS1//PXK//EPHA2//FGD4//FGD5//SNX13
GO:0035567	non-canonical Wnt receptor signaling pathway	Biological process	4	31	410	14742	4.6395	0.0102424	0.135569	1.9896	ROR2//WNT3A//LRP6//WNT7A
GO:0071482	cellular response to light stimulus	Biological process	4	31	410	14742	4.6395	0.0102424	0.135569	1.9896	CHEK1//CDC25A//USP47//FBXW7
GO:0043069	negative regulation of programmed cell death	Biological process	26	576	410	14742	1.62302	0.0106514	0.139892	1.97259	BCL6//ALOX12//IKBKB//IL1A//SNCA//SON//TCF7L2//VEGFA//FAIM3//MYO18A//LRP6//FGFR2//ARAF//TFAP2B//UBE2B//WFS1//WNT7A//ANGPTL4//USP47//RASA1//ITSN1//RTKN//SERBP1//SMAD7//ESR1//KRIT1
GO:0010558	negative regulation of macromolecule biosynthetic process	Biological process	35	838	410	14742	1.50175	0.0106909	0.139892	1.97099	BCL6//CDKN1C//EZH1//FGFR2//HIVEP1//SMAD7//NFIB//PTH//TCF7L2//TFAP2B//TLE4//MBD2//HAND1//NCOR2//SPEN//ZFPM2//SALL4//SOX17//SIRT4//UBE2B//WAPAL//TSPYL2//ARID4A//DEDD//YWHAQ//TH1L//RSF1//USP47//TSHZ3//HMBOX1//KCTD1//EIF2B5//FBXW7//MARCH8//ENPP1
GO:0043405	regulation of MAP kinase activity	Biological process	13	226	410	14742	2.06827	0.0107701	0.139892	1.96778	MAP3K11//PAK3//MAP2K1//MAP3K2//DUSP2//PPP2R1A//DUSP16//WNT7A//FGD4//VEGFA//SMPD1//UCHL1//ZEB2
GO:0008088	axon cargo transport	Biological process	3	17	410	14742	6.34519	0.0108645	0.139892	1.96399	KIF1B//UCHL1//APP
GO:0032489	regulation of Cdc42 protein signal transduction	Biological process	3	17	410	14742	6.34519	0.0108645	0.139892	1.96399	BVES//FGD4//FGD5
GO:0035329	hippo signaling cascade	Biological process	3	17	410	14742	6.34519	0.0108645	0.139892	1.96399	WWC1//YAP1//LATS2
GO:0043088	regulation of Cdc42 GTPase activity	Biological process	3	17	410	14742	6.34519	0.0108645	0.139892	1.96399	BVES//FGD4//FGD5
GO:0050891	multicellular organismal water homeostasis	Biological process	3	17	410	14742	6.34519	0.0108645	0.139892	1.96399	TFAP2B//WFS1//HAS2
GO:2001242	regulation of intrinsic apoptotic signaling pathway	Biological process	3	17	410	14742	6.34519	0.0108645	0.139892	1.96399	SIAH1//BBC3//HTRA2
GO:0035295	tube development	Biological process	19	383	410	14742	1.78372	0.0109914	0.140706	1.95895	NFATC3//VEGFA//FGFR2//SMAD7//GDF11//LRP6//ZEB2//SALL4//HAND1//SOX17//WNT3A//NFIB//ZFPM2//WNT7A//EPHA2//EDA//ESR1//TFAP2B//KIF26B
GO:2000113	negative regulation of cellular macromolecule biosynthetic process	Biological process	34	810	410	14742	1.50927	0.0109937	0.140706	1.95886	BCL6//CDKN1C//EZH1//FGFR2//HIVEP1//SMAD7//NFIB//PTH//TCF7L2//TFAP2B//TLE4//MBD2//HAND1//NCOR2//SPEN//ZFPM2//SALL4//SOX17//SIRT4//UBE2B//WAPAL//TSPYL2//ARID4A//DEDD//YWHAQ//TH1L//RSF1//USP47//TSHZ3//HMBOX1//KCTD1//EIF2B5//FBXW7//ENPP1
GO:2000021	regulation of ion homeostasis	Biological process	8	109	410	14742	2.63898	0.0110625	0.141163	1.95615	SCN1B//P2RX4//FKBP1B//BBC3//DIAPH1//SNCA//ALOX12//SMAD7
GO:0000186	activation of MAPKK activity	Biological process	5	49	410	14742	3.66899	0.011344	0.144323	1.94523	MAP3K11//CRK//MAP3K1//MAP2K1//TAOK2
GO:0033273	response to vitamin	Biological process	10	155	410	14742	2.31975	0.0114481	0.144432	1.94127	TIE1//GGCX//CCNE1//IL1A//LRP6//IRF1//NTRK3//SLC6A4//WNT3A//IL15
GO:0021885	forebrain cell migration	Biological process	4	32	410	14742	4.49451	0.0114542	0.144432	1.94103	LRP6//PEX13//RELN//TNR
GO:0055010	ventricular cardiac muscle tissue morphogenesis	Biological process	4	32	410	14742	4.49451	0.0114542	0.144432	1.94103	ZFPM2//FGFR2//SMAD7//HAND1
GO:0000910	cytokinesis	Biological process	7	89	410	14742	2.82801	0.0119378	0.150085	1.92308	RHOC//CDC42//PKN2//RASA1//SON//SEPT6//ZFYVE26
GO:0006195	purine nucleotide catabolic process	Biological process	23	498	410	14742	1.66062	0.0123035	0.153789	1.90997	RHOC//CDC42//GNAQ//RAB5C//SAR1B//PDE3B//ACLY//KIF1B//RNF213//SMAP1//BVES//BCL6//CRK//MAP2K1//RASA1//RASGRF1//SOS1//PXK//EPHA2//FGD4//FGD5//SNX13//GDA
GO:0001666	response to hypoxia	Biological process	12	205	410	14742	2.10475	0.0123046	0.153789	1.90993	VEGFA//VLDLR//BBC3//USP19//RHOC//IL1A//KCNMA1//SLC6A4//UBE2B//UCP2//ANGPTL4//EGLN1
GO:0051348	negative regulation of transferase activity	Biological process	10	157	410	14742	2.2902	0.0124476	0.155121	1.90492	DUSP2//PPP2R1A//DUSP16//GNAQ//LRP6//TARBP2//CDKN1C//SMPD1//UCHL1//LATS2
GO:0001822	kidney development	Biological process	11	181	410	14742	2.18518	0.0125051	0.155384	1.90291	SLC5A1//GDF11//APH1A//TFAP2B//KIF26B//VEGFA//KCNJ8//LRP4//ODC1//WFS1//AQP11
GO:0060603	mammary gland duct morphogenesis	Biological process	4	33	410	14742	4.35831	0.0127545	0.157591	1.89434	EPHA2//LRP6//FGFR2//ESR1
GO:0021533	cell differentiation in hindbrain	Biological process	3	18	410	14742	5.99268	0.0127726	0.157591	1.89372	ATXN2//WNT7A//PHOX2B
GO:0006917	induction of apoptosis	Biological process	19	389	410	14742	1.75621	0.0127936	0.157591	1.89301	BBC3//RASGRF1//ITSN1//SOS1//ARHGEF3//APH1A//PSENEN//FGD4//DEDD//PTH//PPP3CC//CUL2//HTRA2//PCBP4//ZNF622//PHLDA3//APP//PPP2R1A//TP53INP1
GO:0008544	epidermis development	Biological process	14	257	410	14742	1.9587	0.0129831	0.159464	1.88662	LRP4//CDC42//EPHA2//POU3F1//MAP2K1//LATS2//FGFR2//IL1A//EDA//TFAP2B//WNT7A//ATP2A2//LAMA3//KLK7
GO:0045664	regulation of neuron differentiation	Biological process	15	283	410	14742	1.9058	0.013037	0.159666	1.88482	KATNB1//TNR//WNT3A//WNT7A//APP//RHOC//SLC6A4//PHOX2B//GDF11//CTDSP1//TCF3//OMG//NTRK3//NUMBL//NLGN1
GO:0042592	homeostatic process	Biological process	42	1062	410	14742	1.42199	0.0131477	0.16056	1.88115	GNAQ//IL1A//P2RX4//TFAP2B//WFS1//SCN1B//KRIT1//TUSC3//GPR12//PTH//APP//KCNN4//GPR6//POU3F1//FKBP1B//SLC22A17//KCNMA1//ENPP1//EGLN1//BBC3//SCN8A//EIF2B5//CACNA1E//PDE3B//TCF7L2//CRTC2//VEGFA//SMAP1//LRP6//GYLTL1B//AQP11//BCL6//NDN//ATXN2//DIAPH1//SNCA//ALOX12//FBXW7//SMAD7//HAS2//ANGPTL4//NLGN1
GO:0046849	bone remodeling	Biological process	5	51	410	14742	3.52511	0.0133609	0.162032	1.87416	PTH//VEGFA//LRP6//EPHA2//ENPP1
GO:0019226	transmission of nerve impulse	Biological process	29	674	410	14742	1.54707	0.0133612	0.162032	1.87415	SNCA//NLGN1//AP2A1//CACNA1E//CAMK2G//GABRB3//KCNJ8//KCNMA1//KCNN4//LRP6//RASGRF1//SCN1B//KCNH3//GLS2//WNT7A//KIF1B//POU3F1//FKBP1B//P2RX4//SLC6A4//NISCH//USP46//SCN8A//EIF2B5//SNCG//ITSN1//APP//PXK//TNR
GO:0008629	induction of apoptosis by intracellular signals	Biological process	7	91	410	14742	2.76585	0.0133823	0.162032	1.87347	PCBP4//ZNF622//PHLDA3//BBC3//PPP3CC//CUL2//HTRA2
GO:0012502	induction of programmed cell death	Biological process	19	391	410	14742	1.74723	0.0134439	0.162317	1.87148	BBC3//APP//PPP2R1A//DEDD//PHLDA3//TP53INP1//RASGRF1//ITSN1//SOS1//ARHGEF3//APH1A//PSENEN//FGD4//PTH//PPP3CC//CUL2//HTRA2//PCBP4//ZNF622
GO:0018209	peptidyl-serine modification	Biological process	8	113	410	14742	2.54556	0.0135521	0.163162	1.86799	MAP3K1//NLK//SMAD7//ARAF//CDC42//SNCA//VEGFA//WNT3A
GO:0016477	cell migration	Biological process	31	734	410	14742	1.51858	0.0136939	0.164194	1.86347	ZEB2//NDN//NTRK3//PEX13//RELN//PHOX2B//VEGFA//PPAP2A//ALOX12//KRIT1//PKN2//LRP6//TNR//LAMA3//MAP3K1//RHOC//ROR2//MAP2K1//SMAD7//TIE1//NISCH//IL8//WNT7A//SOX17//EPHA2//SOS1//TAOK2//ABI2//WWC1//BAMBI//MYO18A
GO:0072523	purine-containing compound catabolic process	Biological process	23	503	410	14742	1.64412	0.013715	0.164194	1.86281	RHOC//CDC42//GNAQ//RAB5C//SAR1B//GDA//PDE3B//ACLY//KIF1B//RNF213//SMAP1//BVES//BCL6//CRK//MAP2K1//RASA1//RASGRF1//SOS1//PXK//EPHA2//FGD4//FGD5//SNX13
GO:0031670	cellular response to nutrient	Biological process	6	71	410	14742	3.03854	0.0139745	0.166592	1.85466	IRF1//NTRK3//SLC6A4//WNT3A//IL15//CCNE1
GO:0035637	multicellular organismal signaling	Biological process	29	677	410	14742	1.54022	0.0141196	0.166592	1.85018	SNCA//NLGN1//AP2A1//CACNA1E//CAMK2G//GABRB3//KCNJ8//KCNMA1//KCNN4//LRP6//RASGRF1//SCN1B//KCNH3//GLS2//WNT7A//KIF1B//POU3F1//FKBP1B//P2RX4//SLC6A4//NISCH//USP46//SCN8A//EIF2B5//SNCG//ITSN1//APP//PXK//TNR
GO:0007257	activation of JUN kinase activity	Biological process	4	34	410	14742	4.23013	0.0141453	0.166592	1.84939	MAP3K11//WNT7A//MAP3K2//FGD4
GO:0016601	Rac protein signal transduction	Biological process	4	34	410	14742	4.23013	0.0141453	0.166592	1.84939	CRK//RASGRF1//NISCH
GO:0070936	protein K48-linked ubiquitination	Biological process	4	34	410	14742	4.23013	0.0141453	0.166592	1.84939	UBE2B//UBE2E2//UBE2H//ARIH2
GO:0003205	cardiac chamber development	Biological process	7	92	410	14742	2.73579	0.0141497	0.166592	1.84925	FGFR2//ZFPM2//HAND1//SALL4//SMAD7//EGLN1//LRP6
GO:0043507	positive regulation of JUN kinase activity	Biological process	5	52	410	14742	3.45732	0.0144545	0.169245	1.84	MAP3K11//WNT7A//MAP3K2//FGD4//ZEB2
GO:0045598	regulation of fat cell differentiation	Biological process	5	52	410	14742	3.45732	0.0144545	0.169245	1.84	LRP6//ENPP1//ZFPM2//WNT3A//CARM1
GO:0035023	regulation of Rho protein signal transduction	Biological process	10	161	410	14742	2.2333	0.0146422	0.170973	1.83439	BVES//BCL6//CRK//SOS1//EPHA2//RASGRF1//FGD4//FGD5//ITSN1//ARHGEF3
GO:0051179	localization	Biological process	135	4126	410	14742	1.17646	0.0147602	0.171619	1.83091	TRIP11//BCL6//ZEB2//NDN//NTRK3//PEX13//RELN//PHOX2B//BBC3//SNCA//P2RX4//VEGFA//WNT3A//ACTN1//APP//BRPF3//SPTBN2//STXBP3//AP1M1//BVES//VPS33B//SAR1B//SYTL2//IPO7//LRP4//VAMP8//STX5//NLGN1//KATNB1//YWHAQ//KPNA2//TAOK2//NAGPA//ATP2A2//CACNA1E//GABRB3//GABRE//M6PR//UCP2//VLDLR//TUSC3//SLC5A6//HERC1//SLC25A27//PITPNB//MTCH2//OSBPL3//SLC46A2//UPF3A//KCNJ8//KCNMA1//KCNN4//SCN1B//SCN8A//SLC5A1//KCNH3//SL…
GO:0061061	muscle structure development	Biological process	19	395	410	14742	1.72953	0.0148226	0.171619	1.82907	ZFPM2//SCN8A//BVES//DYRK1B//CDC42//TCF3//MBNL3//TCF7L2//USP19//SOX17//VEGFA//APP//LRP4//NFATC3//FGFR2//EGLN1//SMAD7//HAND1//LRP6
GO:0031648	protein destabilization	Biological process	3	19	410	14742	5.67728	0.01486	0.171619	1.82798	SIAH1//SNCA//SOX17
GO:0035412	regulation of catenin import into nucleus	Biological process	3	19	410	14742	5.67728	0.01486	0.171619	1.82798	BAMBI//WNT3A//GNAQ
GO:0070646	protein modification by small protein removal	Biological process	6	72	410	14742	2.99634	0.0148989	0.171619	1.82685	COPS2//UCHL1//USP19//USP46//USP47//USP34
GO:0006469	negative regulation of protein kinase activity	Biological process	9	138	410	14742	2.34496	0.0150144	0.172483	1.82349	DUSP2//PPP2R1A//DUSP16//SMPD1//UCHL1//LATS2//LRP6//GNAQ//TARBP2
GO:0050801	ion homeostasis	Biological process	25	565	410	14742	1.59098	0.0152233	0.174413	1.81749	GNAQ//SCN1B//GPR12//PTH//APP//GPR6//POU3F1//P2RX4//FKBP1B//TFAP2B//SLC22A17//KCNMA1//KCNN4//ENPP1//WFS1//BBC3//SCN8A//EIF2B5//AQP11//DIAPH1//SNCA//CACNA1E//ALOX12//SMAD7//NLGN1
GO:0009892	negative regulation of metabolic process	Biological process	47	1228	410	14742	1.37617	0.0155129	0.176264	1.80931	BCL6//CDKN1C//EZH1//FGFR2//HIVEP1//SMAD7//NFIB//PTH//TCF7L2//TFAP2B//TLE4//MBD2//HAND1//NCOR2//SPEN//ZFPM2//SALL4//SOX17//LRP6//SIRT4//UBE2B//WAPAL//TSPYL2//CDC42//ESR1//FBXW7//ARID4A//DEDD//YWHAQ//TH1L//RSF1//USP47//TSHZ3//HMBOX1//KCTD1//TARBP2//ENPP1//EIF2B5//SNCA//IRF1//PPP2R1A//SOCS1//MARCH8//PLAT//PDE3B//PSMD7//CDC23
GO:0019725	cellular homeostasis	Biological process	27	624	410	14742	1.55579	0.0155811	0.176264	1.8074	GNAQ//SCN1B//KRIT1//TUSC3//GPR12//PTH//APP//KCNN4//GPR6//POU3F1//P2RX4//FKBP1B//SLC22A17//KCNMA1//ENPP1//WFS1//BBC3//SCN8A//EIF2B5//GYLTL1B//AQP11//DIAPH1//SNCA//CACNA1E//ALOX12//SMAD7//NLGN1
GO:0048646	anatomical structure formation involved in morphogenesis	Biological process	30	712	410	14742	1.515	0.0156204	0.176264	1.80631	FGFR2//IL8//TGFBI//VEGFA//SH2D2A//HAND1//SOX17//NFATC3//DUSP2//ROR2//ZEB2//WNT3A//LRP6//SALL4//UBE2B//DYRK1B//TFAP2B//EPHA2//BAI3//KRIT1//TIE1//ATXN2//WNT7A//EGLN1//IL1A//DDAH1//ANGPTL4//EDA//CDC42//KIF26B
GO:0003229	ventricular cardiac muscle tissue development	Biological process	4	35	410	14742	4.10927	0.0156286	0.176264	1.80608	ZFPM2//FGFR2//SMAD7//HAND1
GO:0010464	regulation of mesenchymal cell proliferation	Biological process	4	35	410	14742	4.10927	0.0156286	0.176264	1.80608	FGFR2//LRP6//VEGFA//NFIB
GO:0045765	regulation of angiogenesis	Biological process	9	139	410	14742	2.32809	0.0156744	0.176264	1.80481	BAI3//KRIT1//TIE1//IL1A//VEGFA//DDAH1//ANGPTL4//EPHA2//EGLN1
GO:2000241	regulation of reproductive process	Biological process	9	139	410	14742	2.32809	0.0156744	0.176264	1.80481	TARBP2//IL8//MAP3K1//RDBP//TH1L//RSF1//ESR1//FGFR2//ZFPM2
GO:0016358	dendrite development	Biological process	7	94	410	14742	2.67758	0.0157781	0.176499	1.80195	RHOC//NUMBL//PAK3//NLGN1//APP//RELN//SS18L1
GO:0030178	negative regulation of Wnt receptor signaling pathway	Biological process	7	94	410	14742	2.67758	0.0157781	0.176499	1.80195	SOX17//LRP4//ROR2//TCF7L2//LATS2//LRP6//NLK
GO:0044270	cellular nitrogen compound catabolic process	Biological process	25	567	410	14742	1.58537	0.0158384	0.176711	1.80029	RHOC//CDC42//GNAQ//RAB5C//SAR1B//GDA//PDE3B//ACLY//KIF1B//RNF213//DPYSL5//ENPP1//SMAP1//BVES//BCL6//CRK//MAP2K1//RASA1//RASGRF1//SOS1//PXK//EPHA2//FGD4//FGD5//SNX13
GO:0051247	positive regulation of protein metabolic process	Biological process	23	510	410	14742	1.62155	0.0159051	0.176783	1.79846	AKTIP//WNT3A//RHOC//UPF3A//WIBG//SMAD7//WFS1//TSPYL5//VEGFA//ARAF//CDC42//SNCA//SMPD1//IL15//IRF1//IL1A//SOX17//EIF2B5//RELN//PSMD7//CDC23//FNTA//FBXW7
GO:0016567	protein ubiquitination	Biological process	19	398	410	14742	1.7165	0.0159279	0.176783	1.79784	MAP3K1//PSMD7//UBE2B//ARIH2//MARCH8//SIAH1//WAC//SMAD7//WFS1//TSPYL5//CDC23//RNF213//UBE2E2//ZFP91//UBE2H//FBXW7//BRAP//FBXL2//RNF130
GO:0009143	nucleoside triphosphate catabolic process	Biological process	21	454	410	14742	1.66317	0.0160678	0.177872	1.79404	RHOC//CDC42//GNAQ//RAB5C//SAR1B//ACLY//KIF1B//RNF213//SMAP1//BVES//BCL6//CRK//MAP2K1//RASA1//RASGRF1//SOS1//EPHA2//FGD4//FGD5//SNX13//ENPP1
GO:0032844	regulation of homeostatic process	Biological process	12	213	410	14742	2.0257	0.016219	0.179081	1.78998	SCN1B//P2RX4//FKBP1B//SMAP1//VEGFA//LRP6//BBC3//DIAPH1//SNCA//ALOX12//SMAD7//CACNA1E
GO:0006916	anti-apoptosis	Biological process	14	265	410	14742	1.89957	0.0165488	0.18225	1.78123	RTKN//SERBP1//SMAD7//RASA1//ESR1//ALOX12//IKBKB//IL1A//SNCA//SON//TCF7L2//VEGFA//FAIM3//MYO18A
GO:0055082	cellular chemical homeostasis	Biological process	24	542	410	14742	1.59215	0.0170588	0.186704	1.76805	GNAQ//SCN1B//GPR12//PTH//APP//GPR6//POU3F1//P2RX4//FKBP1B//SLC22A17//KCNMA1//KCNN4//ENPP1//WFS1//BBC3//SCN8A//EIF2B5//AQP11//DIAPH1//SNCA//CACNA1E//ALOX12//SMAD7//NLGN1
GO:0003016	respiratory system process	Biological process	3	20	410	14742	5.39341	0.0171284	0.186704	1.76628	NLGN1//TSHZ3//NDN
GO:0035411	catenin import into nucleus	Biological process	3	20	410	14742	5.39341	0.0171284	0.186704	1.76628	GNAQ//BAMBI//WNT3A
GO:0097193	intrinsic apoptotic signaling pathway	Biological process	3	20	410	14742	5.39341	0.0171284	0.186704	1.76628	SIAH1//BBC3//HTRA2
GO:0010970	microtubule-based transport	Biological process	4	36	410	14742	3.99512	0.0172062	0.187073	1.76432	APP//KIF1B//UCHL1//MAP2K1
GO:0007267	cell-cell signaling	Biological process	40	1021	410	14742	1.40866	0.0176445	0.19135	1.75339	SNCA//WNT3A//NLGN1//AP2A1//CACNA1E//CAMK2G//GABRB3//KCNJ8//KCNMA1//KCNN4//LRP6//RASGRF1//SCN1B//KCNH3//GLS2//WNT7A//KIF1B//TFAP2B//SNCG//FKBP1B//TCF7L2//SLC6A4//NISCH//USP46//PDE3B//SIRT4//SYTL4//ITSN1//APP//PXK//TNR//PEX5L//P2RX4//CDC42//C1QA//FGFR2//IL15//PTH//ZYX//TUSC2
GO:0048593	camera-type eye morphogenesis	Biological process	6	75	410	14742	2.87649	0.0179252	0.193902	1.74654	TFAP2B//LRP6//VSX1//EPHA2//VEGFA//GDF11
GO:0000018	regulation of DNA recombination	Biological process	4	37	410	14742	3.88715	0.0188797	0.203195	1.72401	CHEK1//UBE2B//BCL6//KPNA2
GO:0007405	neuroblast proliferation	Biological process	4	37	410	14742	3.88715	0.0188797	0.203195	1.72401	FGFR2//NUMBL//LRP6//WNT3A
GO:0016571	histone methylation	Biological process	5	56	410	14742	3.21037	0.0194255	0.206979	1.71163	SETD3//CARM1//MLL//MLL3//SUV420H2
GO:0021987	cerebral cortex development	Biological process	5	56	410	14742	3.21037	0.0194255	0.206979	1.71163	LRP6//PEX13//EMX1//RELN//VLDLR
GO:0042475	odontogenesis of dentin-containing tooth	Biological process	5	56	410	14742	3.21037	0.0194255	0.206979	1.71163	EDA//LRP4//LRP6//HAND1//LHX8
GO:0050688	regulation of defense response to virus	Biological process	5	56	410	14742	3.21037	0.0194255	0.206979	1.71163	PCBP2//TARBP2//AP2A1//AP1M1//IL15
GO:0014706	striated muscle tissue development	Biological process	13	245	410	14742	1.90787	0.0198227	0.21016	1.70284	ZFPM2//DYRK1B//MBNL3//USP19//SOX17//VEGFA//APP//LRP4//EGLN1//FGFR2//SMAD7//HAND1//LRP6
GO:0016049	cell growth	Biological process	17	353	410	14742	1.7316	0.020269	0.214358	1.69317	TAOK2//ALOX12//RHOC//DERL2//USP47//BCL6//ENPP1//PPP2R1A//TSPYL2//SOX17//ARIH2//APP//NDN//OMG//NTRK3//TNR//WNT3A
GO:0070482	response to oxygen levels	Biological process	12	220	410	14742	1.96124	0.0203586	0.214774	1.69125	RHOC//IL1A//KCNMA1//SLC6A4//UBE2B//UCP2//VEGFA//ANGPTL4//EGLN1//VLDLR//BBC3//USP19
GO:0042127	regulation of cell proliferation	Biological process	41	1063	410	14742	1.38683	0.0206444	0.21678	1.6852	KRIT1//VEGFA//FGFR2//LRP6//CARM1//ALOX12//IL15//ODC1//PGGT1B//TFAP2B//DNAJA2//BAMBI//DERL2//TSPYL5//WNT3A//BCL6//CDKN1C//IL1A//IL8//NDN//NFIB//ROR2//MAP2K1//CUL2//PPAP2A//PHOX2B//GDF11//TMEM115//SESN1//CASK//SLC6A4//TCF3//ESR1//TCF7L2//WNT7A//CDC42//SOX17//FBXW7//ESRRA//MBD2//CDCA7
GO:0003151	outflow tract morphogenesis	Biological process	4	38	410	14742	3.78485	0.0206505	0.21678	1.68507	FGFR2//ZFPM2//LRP6//SOX17
GO:0009056	catabolic process	Biological process	67	1890	410	14742	1.27463	0.0208806	0.218657	1.68026	PPP2R1A//UPF3A//WIBG//MAP3K1//SIAH1//ARIH2//LSM5//XPC//PEX13//PFKP//RHOC//CDC42//GNAQ//RAB5C//SAR1B//GDA//PDE3B//ACLY//KIF1B//RNF213//DPYSL5//UBE2B//UBE2H//UCHL1//CUL2//CDC23//USP34//USP19//FBXL4//USP53//USP47//USP46//USP27X//DDAH1//SMPD1//LAMP1//WDR45//HTRA2//ENPP1//PAFAH1B2//PLCD1//PNPLA6//PLD3//KIAA1324//LYZL2//WFS1//DERL2//PSMD7//FBXW7//SMAP1//BVES//BCL6//CRK//MAP2K1//RASA1//RASGRF1//SOS1//SM…
GO:0007498	mesoderm development	Biological process	7	100	410	14742	2.51693	0.0214548	0.224119	1.66848	HAND1//SOX17//EPHA2//WNT3A//TIE1//VEGFA//GDF11
GO:0048870	cell motility	Biological process	32	791	410	14742	1.45461	0.0215657	0.224178	1.66624	ZEB2//NDN//NTRK3//PEX13//RELN//PHOX2B//VEGFA//PPAP2A//ALOX12//KRIT1//PKN2//TAOK2//ABI2//WWC1//BAMBI//MYO18A//LRP6//TNR//CACNA1E//LAMA3//MAP3K1//RHOC//ROR2//MAP2K1//SMAD7//TIE1//NISCH//IL8//WNT7A//SOX17//EPHA2//SOS1
GO:0051674	localization of cell	Biological process	32	791	410	14742	1.45461	0.0215657	0.224178	1.66624	ZEB2//NDN//NTRK3//PEX13//RELN//PHOX2B//VEGFA//PPAP2A//ALOX12//KRIT1//PKN2//TAOK2//ABI2//WWC1//BAMBI//MYO18A//LRP6//TNR//CACNA1E//LAMA3//MAP3K1//RHOC//ROR2//MAP2K1//SMAD7//TIE1//NISCH//IL8//WNT7A//SOX17//EPHA2//SOS1
GO:0043523	regulation of neuron apoptosis	Biological process	9	147	410	14742	2.20139	0.0217432	0.225473	1.66268	RASA1//ITSN1//SNCA//WFS1//RHOC//MAP3K11//TFAP2B//ESR1//GABRB3
GO:0007032	endosome organization	Biological process	3	22	410	14742	4.9031	0.0222132	0.229231	1.65339	AQP11//RAB5C//AKTIP
GO:0021795	cerebral cortex cell migration	Biological process	3	22	410	14742	4.9031	0.0222132	0.229231	1.65339	RELN//LRP6//PEX13
GO:0021953	central nervous system neuron differentiation	Biological process	7	101	410	14742	2.49201	0.0225225	0.230989	1.64738	WNT3A//ATXN2//WNT7A//FGFR2//GNAQ//LHX8//NFIB
GO:0001525	angiogenesis	Biological process	16	330	410	14742	1.74333	0.0225821	0.230989	1.64624	NFATC3//VEGFA//BAI3//KRIT1//TIE1//EPHA2//EGLN1//IL1A//DDAH1//ANGPTL4//FGFR2//IL8//TGFBI//SH2D2A//HAND1//SOX17
GO:0001558	regulation of cell growth	Biological process	14	276	410	14742	1.82386	0.0226184	0.230989	1.64554	ALOX12//RHOC//DERL2//USP47//BCL6//ENPP1//PPP2R1A//TSPYL2//SOX17//OMG//NTRK3//TNR//WNT3A//TAOK2
GO:0009058	biosynthetic process	Biological process	154	4839	410	14742	1.14429	0.0226401	0.230989	1.64512	CDC25A//CHEK1//MCM3//NFIB//CCNE1//BCL6//CDKN1C//EZH1//FGFR2//HIVEP1//SMAD7//PTH//TCF7L2//TFAP2B//TLE4//MBD2//HAND1//NCOR2//SPEN//ZFPM2//SALL4//SOX17//CCNT2//IRF1//MLL//NFATC3//ARID4A//TBP//RDBP//COPS2//TRIP11//AFF4//TH1L//POLR3G//CRTC2//IMPDH1//TFAM//PPP2R1A//SIRT4//ESR1//MLF1//TCF3//MYNN//RSF1//RUNX1T1//ELAVL2//FLI1//HDGF//NDN//NONO//POU3F1//PKN2//TARBP2//TMPO//ZFX//JRKL//PHOX2B//DENND4A//YAP1//…
GO:0051336	regulation of hydrolase activity	Biological process	31	764	410	14742	1.45895	0.0226544	0.230989	1.64485	SNCA//BBC3//HDGF//IL8//WFS1//TSPYL2//GNAQ//FGFR2//SYTL2//SMAP1//BVES//BCL6//CRK//MAP2K1//RASA1//RASGRF1//SOS1//FKBP1B//PXK//EPHA2//FGD4//FGD5//TFAP2B//USP47//ALOX12//RHOC//HTRA2//WNT3A//SNX13//ANGPTL4//FNTA
GO:0016192	vesicle-mediated transport	Biological process	35	887	410	14742	1.41879	0.0232708	0.236707	1.63319	TRIP11//WNT3A//ACTN1//APP//VEGFA//BRPF3//VAMP8//STX5//NLGN1//STXBP5L//SYTL2//SAR1B//AP1M1//AP2A1//LRP2//LRP4//LRP6//RABEP1//M6PR//VLDLR//STXBP3//VPS33B//TRIM36//AKTIP//TRPV6//RAB5C//IL8//SNCA//PEX5L//EXPH5//SYTL4//ITSN1//MAP2K1//SPTBN2//BVES
GO:0001508	regulation of action potential	Biological process	7	102	410	14742	2.46758	0.0236263	0.238718	1.6266	POU3F1//P2RX4//SCN8A//EIF2B5//SCN1B//SMAD7//GNAQ
GO:0010721	negative regulation of cell development	Biological process	7	102	410	14742	2.46758	0.0236263	0.238718	1.6266	SMAD7//TNR//NTRK3//WNT3A//WNT7A//CTDSP1//OMG
GO:0044248	cellular catabolic process	Biological process	58	1611	410	14742	1.29451	0.0236496	0.238718	1.62618	PPP2R1A//UPF3A//WIBG//MAP3K1//SIAH1//ARIH2//LSM5//XPC//PEX13//RHOC//CDC42//GNAQ//RAB5C//SAR1B//GDA//PDE3B//ACLY//KIF1B//RNF213//DPYSL5//UBE2B//UBE2H//UCHL1//CUL2//CDC23//USP34//USP19//FBXL4//USP53//USP47//USP46//USP27X//DDAH1//SMPD1//LAMP1//WDR45//HTRA2//ENPP1//KIAA1324//WFS1//DERL2//PSMD7//FBXW7//SMAP1//BVES//BCL6//CRK//MAP2K1//RASA1//RASGRF1//SOS1//SMAD7//PXK//EPHA2//FGD4//FGD5//PCBP2//SNX13
GO:0031400	negative regulation of protein modification process	Biological process	10	174	410	14742	2.06644	0.0237839	0.238718	1.62372	LRP6//SMAD7//ENPP1//UBE2B//SNCA//IRF1//PPP2R1A//SOCS1//PSMD7//CDC23
GO:0051781	positive regulation of cell division	Biological process	5	59	410	14742	3.04713	0.0238114	0.238718	1.62322	CDC42//PKN2//FGFR2//IL1A//VEGFA
GO:0050768	negative regulation of neurogenesis	Biological process	6	80	410	14742	2.69671	0.0238606	0.238718	1.62232	TNR//NTRK3//WNT3A//OMG//WNT7A//CTDSP1
GO:0051302	regulation of cell division	Biological process	6	80	410	14742	2.69671	0.0238606	0.238718	1.62232	FGFR2//IL1A//VEGFA//CDC42//PKN2//SOX17
GO:0051094	positive regulation of developmental process	Biological process	25	589	410	14742	1.52615	0.0239943	0.239494	1.61989	WNT3A//BAMBI//PTH//IL15//TCF7L2//CCNE1//MAP2K1//SOX17//CARM1//ALOX12//SMAP1//TCF3//PHOX2B//IL1A//VEGFA//DDAH1//ANGPTL4//NTRK3//NUMBL//SPEN//CDC42//WNT7A//NLGN1//FGFR2//ZFPM2
GO:0016570	histone modification	Biological process	13	252	410	14742	1.85488	0.024304	0.24053	1.61432	WAC//SETD3//CARM1//MLL3//SUV420H2//UBE2B//SNCA//CHEK1//TCF3//PHF15//BRPF3//ING3//MLL
GO:0032259	methylation	Biological process	8	126	410	14742	2.28293	0.0244657	0.24053	1.61144	PCMT1//SETD3//CARM1//MLL3//SUV420H2//EZH1//MLL//AHCY
GO:0001947	heart looping	Biological process	4	40	410	14742	3.59561	0.0244895	0.24053	1.61102	LRP6//HAND1//SOX17//WNT3A
GO:0021954	central nervous system neuron development	Biological process	4	40	410	14742	3.59561	0.0244895	0.24053	1.61102	FGFR2//GNAQ//LHX8//NFIB
GO:0042733	embryonic digit morphogenesis	Biological process	4	40	410	14742	3.59561	0.0244895	0.24053	1.61102	GNAQ//LRP4//LRP6//WNT7A
GO:0043500	muscle adaptation	Biological process	4	40	410	14742	3.59561	0.0244895	0.24053	1.61102	P2RX4//IL15//USP19//CAMK2G
GO:0006816	calcium ion transport	Biological process	12	226	410	14742	1.90917	0.0244932	0.24053	1.61096	P2RX4//FKBP1B//BBC3//DIAPH1//SNCA//CAMK2G//CACNA1E//RHOC//WFS1//ATP2A2//TRPV6//KCNN4
GO:0008285	negative regulation of cell proliferation	Biological process	21	475	410	14742	1.58964	0.0250174	0.241903	1.60176	KRIT1//CASK//SLC6A4//IL15//CDKN1C//LRP6//FBXW7//NFIB//BCL6//IL1A//IL8//NDN//ROR2//MAP2K1//TFAP2B//CUL2//PPAP2A//PHOX2B//GDF11//TMEM115//SESN1
GO:0010453	regulation of cell fate commitment	Biological process	3	23	410	14742	4.68993	0.0250303	0.241903	1.60153	WNT3A//SOX17//FGFR2
GO:0021879	forebrain neuron differentiation	Biological process	3	23	410	14742	4.68993	0.0250303	0.241903	1.60153	FGFR2//GNAQ//LHX8
GO:0030104	water homeostasis	Biological process	3	23	410	14742	4.68993	0.0250303	0.241903	1.60153	TFAP2B//WFS1//HAS2
GO:0035020	regulation of Rac protein signal transduction	Biological process	3	23	410	14742	4.68993	0.0250303	0.241903	1.60153	BVES//CRK//RASGRF1
GO:0046676	negative regulation of insulin secretion	Biological process	3	23	410	14742	4.68993	0.0250303	0.241903	1.60153	PDE3B//SIRT4//SYTL4
GO:0060444	branching involved in mammary gland duct morphogenesis	Biological process	3	23	410	14742	4.68993	0.0250303	0.241903	1.60153	ESR1//EPHA2//LRP6
GO:0003206	cardiac chamber morphogenesis	Biological process	6	81	410	14742	2.66341	0.025188	0.242876	1.59881	FGFR2//ZFPM2//HAND1//SMAD7//EGLN1//LRP6
GO:0016579	protein deubiquitination	Biological process	5	60	410	14742	2.99634	0.0254038	0.243306	1.5951	USP47//USP34//UCHL1//USP19//USP46
GO:0043407	negative regulation of MAP kinase activity	Biological process	5	60	410	14742	2.99634	0.0254038	0.243306	1.5951	DUSP2//PPP2R1A//DUSP16//SMPD1//UCHL1
GO:0071295	cellular response to vitamin	Biological process	5	60	410	14742	2.99634	0.0254038	0.243306	1.5951	IRF1//NTRK3//SLC6A4//WNT3A//IL15
GO:0010629	negative regulation of gene expression	Biological process	32	802	410	14742	1.43466	0.0255793	0.244437	1.59211	BCL6//CDKN1C//EZH1//FGFR2//HIVEP1//SMAD7//NFIB//PTH//TCF7L2//TFAP2B//TLE4//MBD2//HAND1//NCOR2//SPEN//ZFPM2//SALL4//SOX17//SIRT4//UBE2B//ARID4A//DEDD//YWHAQ//TH1L//RSF1//USP47//TSHZ3//HMBOX1//KCTD1//TARBP2//CDC42//ESR1
GO:0060341	regulation of cellular localization	Biological process	23	535	410	14742	1.54578	0.0260658	0.248195	1.58393	SNCA//CACNA1E//TFAP2B//FKBP1B//SNCG//TRPV6//TCF7L2//GNAQ//BAMBI//WNT3A//EDA//EXPH5//SYTL4//STXBP3//PDE3B//SIRT4//KCNN4//IL1A//PEX5L//CDC42//WAPAL//EPHA2//MAP2K1
GO:0016568	chromatin modification	Biological process	19	420	410	14742	1.62659	0.0261254	0.248195	1.58294	RSF1//CHEK1//WAC//SETD3//CARM1//MLL3//SUV420H2//UBE2B//SNCA//TCF3//PHF15//BRPF3//ING3//MLL//EZH1//SS18L1//ASF1B//C11ORF30//TSPYL2
GO:0006184	GTP catabolic process	Biological process	17	364	410	14742	1.67927	0.0262882	0.248195	1.58024	SMAP1//BVES//BCL6//CRK//MAP2K1//RASA1//RASGRF1//SOS1//EPHA2//FGD4//FGD5//GNAQ//SNX13//RHOC//CDC42//RAB5C//SAR1B
GO:0009203	ribonucleoside triphosphate catabolic process	Biological process	20	449	410	14742	1.60161	0.0264046	0.248195	1.57832	RHOC//CDC42//GNAQ//RAB5C//SAR1B//ACLY//KIF1B//RNF213//SMAP1//BVES//BCL6//CRK//MAP2K1//RASA1//RASGRF1//SOS1//EPHA2//FGD4//FGD5//SNX13
GO:0009207	purine ribonucleoside triphosphate catabolic process	Biological process	20	449	410	14742	1.60161	0.0264046	0.248195	1.57832	RHOC//CDC42//GNAQ//RAB5C//SAR1B//ACLY//KIF1B//RNF213//SMAP1//BVES//BCL6//CRK//MAP2K1//RASA1//RASGRF1//SOS1//EPHA2//FGD4//FGD5//SNX13
GO:0032270	positive regulation of cellular protein metabolic process	Biological process	20	449	410	14742	1.60161	0.0264046	0.248195	1.57832	AKTIP//WNT3A//RHOC//UPF3A//WIBG//SMAD7//WFS1//TSPYL5//VEGFA//ARAF//CDC42//SNCA//SMPD1//IL15//EIF2B5//RELN//PSMD7//CDC23//FNTA//FBXW7
GO:0046700	heterocycle catabolic process	Biological process	24	565	410	14742	1.52734	0.0264311	0.248195	1.57789	RHOC//CDC42//GNAQ//RAB5C//SAR1B//GDA//PDE3B//ACLY//KIF1B//RNF213//DPYSL5//SMAP1//BVES//BCL6//CRK//MAP2K1//RASA1//RASGRF1//SOS1//PXK//EPHA2//FGD4//FGD5//SNX13
GO:0060537	muscle tissue development	Biological process	13	255	410	14742	1.83306	0.0264385	0.248195	1.57776	ZFPM2//DYRK1B//MBNL3//USP19//SOX17//VEGFA//APP//LRP4//EGLN1//FGFR2//SMAD7//HAND1//LRP6
GO:0010522	regulation of calcium ion transport into cytosol	Biological process	4	41	410	14742	3.50791	0.0265599	0.248787	1.57577	P2RX4//FKBP1B//DIAPH1//SNCA
GO:0009146	purine nucleoside triphosphate catabolic process	Biological process	20	450	410	14742	1.59805	0.0269493	0.25133	1.56945	RHOC//CDC42//GNAQ//RAB5C//SAR1B//ACLY//KIF1B//RNF213//SMAP1//BVES//BCL6//CRK//MAP2K1//RASA1//RASGRF1//SOS1//EPHA2//FGD4//FGD5//SNX13
GO:0009894	regulation of catabolic process	Biological process	20	450	410	14742	1.59805	0.0269493	0.25133	1.56945	SMAP1//BVES//BCL6//CRK//MAP2K1//RASA1//RASGRF1//SOS1//SMAD7//PXK//EPHA2//CDC42//FGD4//FGD5//GNAQ//SNX13//SOX17//PDE3B//FBXW7//KIAA1324
GO:0022407	regulation of cell-cell adhesion	Biological process	5	61	410	14742	2.94722	0.027063	0.251338	1.56762	TNR//SMAD7//KIF26B//MAP2K1//WNT3A
GO:0046903	secretion	Biological process	29	715	410	14742	1.45836	0.0270681	0.251338	1.56754	SNCA//ACTN1//APP//VEGFA//BRPF3//NLGN1//STXBP5L//SYTL2//STXBP3//VPS33B//WNT7A//GLS2//TRIM36//CACNA1E//TFAP2B//SNCG//TRPV6//CAMK2G//FKBP1B//TCF7L2//P2RX4//PEX5L//EXPH5//SYTL4//KCNN4//PDE3B//SIRT4//NISCH//IL1A
GO:0032446	protein modification by small protein conjugation	Biological process	19	423	410	14742	1.61505	0.0278314	0.257226	1.55547	MAP3K1//PSMD7//UBE2B//ARIH2//MARCH8//SIAH1//UBE2H//BRAP//CDC23//FBXL2//FBXW7//RNF130//RNF213//WAC//SMAD7//WFS1//TSPYL5//UBE2E2//ZFP91
GO:0043473	pigmentation	Biological process	6	83	410	14742	2.59924	0.0279885	0.257226	1.55302	VPS33B//MAP2K1//AP1M1//GNAQ//EDA//ATRN
GO:0000188	inactivation of MAPK activity	Biological process	3	24	410	14742	4.49451	0.0280305	0.257226	1.55237	DUSP2//PPP2R1A//DUSP16
GO:0007628	adult walking behavior	Biological process	3	24	410	14742	4.49451	0.0280305	0.257226	1.55237	SCN8A//UCHL1//HTRA2
GO:0021587	cerebellum morphogenesis	Biological process	3	24	410	14742	4.49451	0.0280305	0.257226	1.55237	ATXN2//WNT7A//LRP6
GO:0007610	behavior	Biological process	20	452	410	14742	1.59098	0.0280643	0.257226	1.55185	CACNA1E//APP//PEX13//LHX8//SLC6A4//VLDLR//RASGRF1//RELN//SCN8A//UCHL1//HTRA2//TNR//SNCA//SNCG//MBD2//WNT3A//VEGFA//IL8//GNAQ//USP46
GO:0044265	cellular macromolecule catabolic process	Biological process	27	658	410	14742	1.4754	0.0284	0.258759	1.54668	PPP2R1A//UPF3A//WIBG//MAP3K1//SIAH1//ARIH2//LSM5//XPC//UBE2B//UBE2H//UCHL1//CUL2//CDC23//USP34//USP19//FBXL4//USP53//USP47//USP46//USP27X//HTRA2//WFS1//DERL2//PSMD7//FBXW7//SMAD7//PCBP2
GO:0008154	actin polymerization or depolymerization	Biological process	7	106	410	14742	2.37446	0.0284137	0.258759	1.54647	RHOC//DIAPH1//PAK3//RASA1//MAP3K1//SPTBN2//ABI2
GO:0051604	protein maturation	Biological process	7	106	410	14742	2.37446	0.0284137	0.258759	1.54647	ADAMTS3//APH1A//PSENEN//CORIN//FKBP1B//WFS1//PLAT
GO:0016569	covalent chromatin modification	Biological process	13	258	410	14742	1.81174	0.0287077	0.25941	1.542	WAC//SETD3//CARM1//MLL3//SUV420H2//UBE2B//SNCA//CHEK1//TCF3//PHF15//BRPF3//ING3//MLL
GO:0003143	embryonic heart tube morphogenesis	Biological process	4	42	410	14742	3.42439	0.0287319	0.25941	1.54163	LRP6//HAND1//SOX17//WNT3A
GO:0061371	determination of heart left/right asymmetry	Biological process	4	42	410	14742	3.42439	0.0287319	0.25941	1.54163	LRP6//HAND1//SOX17//WNT3A
GO:0071456	cellular response to hypoxia	Biological process	4	42	410	14742	3.42439	0.0287319	0.25941	1.54163	USP19//VEGFA//VLDLR//BBC3
GO:0051648	vesicle localization	Biological process	5	62	410	14742	2.89969	0.0287895	0.25941	1.54077	STX5//NLGN1//VPS33B//MAP2K1//SAR1B
GO:0009154	purine ribonucleotide catabolic process	Biological process	20	454	410	14742	1.58397	0.0292138	0.261071	1.53441	RHOC//CDC42//GNAQ//RAB5C//SAR1B//ACLY//KIF1B//RNF213//SMAP1//BVES//BCL6//CRK//MAP2K1//RASA1//RASGRF1//SOS1//EPHA2//FGD4//FGD5//SNX13
GO:0048729	tissue morphogenesis	Biological process	18	397	410	14742	1.63025	0.0292886	0.261071	1.5333	NFATC3//VEGFA//HAND1//LRP6//ZEB2//SALL4//SOX17//WNT3A//ZFPM2//FGFR2//CDC42//WNT7A//EPHA2//EGLN1//SMAD7//ROR2//ESR1//KIF26B
GO:0000079	regulation of cyclin-dependent protein kinase activity	Biological process	6	84	410	14742	2.56829	0.0294627	0.261071	1.53073	LATS2//CCNE1//CCNT2//CDC25A//CDKN1C//CCNL2
GO:0030307	positive regulation of cell growth	Biological process	6	84	410	14742	2.56829	0.0294627	0.261071	1.53073	NTRK3//WNT3A//ALOX12//RHOC//DERL2//USP47
GO:0030534	adult behavior	Biological process	6	84	410	14742	2.56829	0.0294627	0.261071	1.53073	SCN8A//UCHL1//HTRA2//APP//SNCA//SNCG
GO:0016573	histone acetylation	Biological process	7	107	410	14742	2.35227	0.0297059	0.261071	1.52716	SNCA//TCF3//PHF15//BRPF3//ING3//MLL//CHEK1
GO:0060429	epithelium development	Biological process	22	513	410	14742	1.54198	0.0298012	0.261071	1.52577	NFATC3//VEGFA//LRP6//ZEB2//SALL4//HAND1//SOX17//WNT3A//ESR1//CDC42//FGFR2//WNT7A//EPHA2//POU3F1//MAP2K1//LATS2//IL1A//ALOX12//ROR2//NFIB//TFAP2B//KIF26B
GO:0002087	regulation of respiratory gaseous exchange by neurological system process	Biological process	2	10	410	14742	7.19122	0.029954	0.261071	1.52355	NLGN1//TSHZ3
GO:0003148	outflow tract septum morphogenesis	Biological process	2	10	410	14742	7.19122	0.029954	0.261071	1.52355	FGFR2//ZFPM2
GO:0006837	serotonin transport	Biological process	2	10	410	14742	7.19122	0.029954	0.261071	1.52355	SLC6A4//SNCA
GO:0035112	genitalia morphogenesis	Biological process	2	10	410	14742	7.19122	0.029954	0.261071	1.52355	ROR2//LRP6
GO:0035810	positive regulation of urine volume	Biological process	2	10	410	14742	7.19122	0.029954	0.261071	1.52355	HAS2//TFAP2B
GO:0042074	cell migration involved in gastrulation	Biological process	2	10	410	14742	7.19122	0.029954	0.261071	1.52355	LRP6//SOX17
GO:0051968	positive regulation of synaptic transmission, glutamatergic	Biological process	2	10	410	14742	7.19122	0.029954	0.261071	1.52355	TNR//NLGN1
GO:0055062	phosphate ion homeostasis	Biological process	2	10	410	14742	7.19122	0.029954	0.261071	1.52355	ENPP1//TFAP2B
GO:0072506	trivalent inorganic anion homeostasis	Biological process	2	10	410	14742	7.19122	0.029954	0.261071	1.52355	ENPP1//TFAP2B
GO:0030036	actin cytoskeleton organization	Biological process	17	370	410	14742	1.65204	0.030092	0.261739	1.52155	ACTN1//CDC42//RHOC//ABI2//DIAPH1//PAK3//RASA1//MAP3K1//CNN1//MYO18A//CRK//SPTBN2//BCL6//TAOK2//NISCH//FGD4//FGD5
GO:0070838	divalent metal ion transport	Biological process	13	260	410	14742	1.7978	0.0302976	0.262631	1.51859	KCNN4//TRPV6//P2RX4//FKBP1B//TUSC3//BBC3//DIAPH1//SNCA//CAMK2G//CACNA1E//RHOC//WFS1//ATP2A2
GO:0060562	epithelial tube morphogenesis	Biological process	11	207	410	14742	1.91071	0.0303178	0.262631	1.5183	LRP6//ZEB2//SALL4//HAND1//SOX17//WNT3A//EPHA2//FGFR2//ESR1//KIF26B//VEGFA
GO:0009261	ribonucleotide catabolic process	Biological process	20	456	410	14742	1.57702	0.0303985	0.262796	1.51715	RHOC//CDC42//GNAQ//RAB5C//SAR1B//ACLY//KIF1B//RNF213//SMAP1//BVES//BCL6//CRK//MAP2K1//RASA1//RASGRF1//SOS1//EPHA2//FGD4//FGD5//SNX13
GO:0045892	negative regulation of transcription, DNA-dependent	Biological process	29	723	410	14742	1.44222	0.0307067	0.264923	1.51277	BCL6//CDKN1C//EZH1//FGFR2//HIVEP1//SMAD7//NFIB//PTH//TCF7L2//TFAP2B//TLE4//MBD2//HAND1//NCOR2//SPEN//ZFPM2//SALL4//SOX17//SIRT4//UBE2B//ARID4A//DEDD//YWHAQ//TH1L//RSF1//USP47//TSHZ3//HMBOX1//KCTD1
GO:0030041	actin filament polymerization	Biological process	6	85	410	14742	2.53808	0.0309871	0.265528	1.50882	PAK3//RASA1//RHOC//MAP3K1//SPTBN2//DIAPH1
GO:0010463	mesenchymal cell proliferation	Biological process	4	43	410	14742	3.34475	0.0310065	0.265528	1.50855	FGFR2//LRP6//VEGFA//NFIB
GO:0022403	cell cycle phase	Biological process	32	815	410	14742	1.41177	0.0310515	0.265528	1.50792	KPNA2//CDKN1C//MAP3K11//TCF3//CDC23//CCNE1//CDC25A//MCM3//PPP6C//PSMD7//WEE1//CUL2//LATS2//APP//CHEK1//PPP2R1A//TUBA1A//CEP164//RCC2//MAP2K1//KATNB1//WAPAL//PBK//FSD1//NEK9//CDC42//UBE2B//USP47//BCL6//IL1A
GO:0035239	tube morphogenesis	Biological process	13	261	410	14742	1.79092	0.0311162	0.265528	1.50701	NFATC3//VEGFA//LRP6//ZEB2//SALL4//HAND1//SOX17//WNT3A//EPHA2//FGFR2//EDA//ESR1//KIF26B
GO:0006904	vesicle docking involved in exocytosis	Biological process	3	25	410	14742	4.31473	0.0312129	0.265528	1.50567	STXBP3//VPS33B//SYTL2
GO:0051279	regulation of release of sequestered calcium ion into cytosol	Biological process	3	25	410	14742	4.31473	0.0312129	0.265528	1.50567	FKBP1B//SNCA//DIAPH1
GO:0090278	negative regulation of peptide hormone secretion	Biological process	3	25	410	14742	4.31473	0.0312129	0.265528	1.50567	PDE3B//SIRT4//SYTL4
GO:0050767	regulation of neurogenesis	Biological process	16	344	410	14742	1.67238	0.0315138	0.267553	1.5015	KATNB1//TNR//WNT3A//WNT7A//NLGN1//APP//RHOC//SLC6A4//PHOX2B//GDF11//CTDSP1//TCF3//OMG//NTRK3//NUMBL//SPEN
GO:0009141	nucleoside triphosphate metabolic process	Biological process	22	517	410	14742	1.53005	0.0320894	0.270976	1.49364	RHOC//CDC42//GNAQ//RAB5C//SAR1B//ACLY//KIF1B//RNF213//ATP2A2//ENPP1//SMAP1//BVES//BCL6//CRK//MAP2K1//RASA1//RASGRF1//SOS1//EPHA2//FGD4//FGD5//SNX13
GO:0051270	regulation of cellular component movement	Biological process	17	373	410	14742	1.63875	0.0321407	0.270976	1.49294	VEGFA//ALOX12//KRIT1//LAMA3//MAP3K1//RHOC//ROR2//MAP2K1//SMAD7//TIE1//NISCH//EPHA2//WNT3A//ACTN1//BCL6//IL8//PKN2
GO:0018393	internal peptidyl-lysine acetylation	Biological process	7	109	410	14742	2.30911	0.0324081	0.270976	1.48935	SNCA//TCF3//PHF15//BRPF3//ING3//MLL//CHEK1
GO:0042058	regulation of epidermal growth factor receptor signaling pathway	Biological process	5	64	410	14742	2.80907	0.0324478	0.270976	1.48881	FBXW7//APP//AP2A1//CDC42//ESR1
GO:0043506	regulation of JUN kinase activity	Biological process	5	64	410	14742	2.80907	0.0324478	0.270976	1.48881	MAP3K11//WNT7A//MAP3K2//FGD4//ZEB2
GO:0051099	positive regulation of binding	Biological process	5	64	410	14742	2.80907	0.0324478	0.270976	1.48881	KRIT1//TCF7L2//BAMBI//AKTIP//WNT3A
GO:0051896	regulation of protein kinase B signaling cascade	Biological process	5	64	410	14742	2.80907	0.0324478	0.270976	1.48881	ITSN1//TCF7L2//TSPYL5//EPHA2//PHLDA3
GO:0051234	establishment of localization	Biological process	112	3442	410	14742	1.16998	0.0325294	0.270976	1.48772	TRIP11//BCL6//BBC3//SNCA//P2RX4//WNT3A//ACTN1//APP//VEGFA//BRPF3//SPTBN2//STXBP3//AP1M1//BVES//VPS33B//SAR1B//SYTL2//IPO7//VAMP8//STX5//NLGN1//KATNB1//YWHAQ//KPNA2//TAOK2//NAGPA//ATP2A2//CACNA1E//GABRB3//GABRE//M6PR//UCP2//VLDLR//TUSC3//SLC5A6//HERC1//SLC25A27//PITPNB//MTCH2//OSBPL3//SLC46A2//UPF3A//KCNJ8//KCNMA1//KCNN4//SCN1B//SCN8A//SLC5A1//KCNH3//SLCO3A1//SLC22A17//TRPV6//HEPHL1//KCTD1//KCTD8/…
GO:0009411	response to UV	Biological process	6	86	410	14742	2.50856	0.0325621	0.270976	1.48729	XPC//CHEK1//CDC25A//USP47//FBXW7//UBE2B
GO:0000209	protein polyubiquitination	Biological process	9	158	410	14742	2.04813	0.0326163	0.270976	1.48657	UBE2B//UBE2E2//ARIH2//ZFP91//UBE2H//CDC23//MAP3K1//PSMD7//MARCH8
GO:0003007	heart morphogenesis	Biological process	9	158	410	14742	2.04813	0.0326163	0.270976	1.48657	LRP6//HAND1//SOX17//WNT3A//FGFR2//ZFPM2//EGLN1//SMAD7//VEGFA
GO:0007268	synaptic transmission	Biological process	25	607	410	14742	1.48089	0.0328283	0.271848	1.48375	SNCA//NLGN1//WNT7A//GLS2//KIF1B//SLC6A4//NISCH//USP46//SNCG//RASGRF1//ITSN1//APP//PXK//TNR//P2RX4//AP2A1//CACNA1E//CAMK2G//GABRB3//KCNJ8//KCNMA1//KCNN4//LRP6//SCN1B//KCNH3
GO:0031324	negative regulation of cellular metabolic process	Biological process	42	1130	410	14742	1.33642	0.0328488	0.271848	1.48348	BCL6//CDKN1C//EZH1//FGFR2//HIVEP1//SMAD7//NFIB//PTH//TCF7L2//TFAP2B//TLE4//MBD2//HAND1//NCOR2//SPEN//ZFPM2//SALL4//SOX17//LRP6//SIRT4//UBE2B//WAPAL//TSPYL2//FBXW7//ARID4A//DEDD//YWHAQ//TH1L//RSF1//USP47//TSHZ3//HMBOX1//KCTD1//ENPP1//EIF2B5//SNCA//IRF1//PPP2R1A//SOCS1//PLAT//PSMD7//CDC23
GO:0006357	regulation of transcription from RNA polymerase II promoter	Biological process	39	1036	410	14742	1.35356	0.0329325	0.272012	1.48237	CCNE1//BCL6//CDKN1C//EZH1//FGFR2//HIVEP1//SMAD7//NFIB//PTH//TCF7L2//TFAP2B//TLE4//MBD2//HAND1//NCOR2//SPEN//ZFPM2//SALL4//SOX17//CHEK1//MAP2K1//APP//ESR1//ESRRA//IL1A//IRF1//LRP6//MLL//NFATC3//TCF3//VEGFA//WNT7A//PHOX2B//WNT3A//CRK//MYCN//TARBP2//CTDSP1//ZNF367
GO:0071496	cellular response to external stimulus	Biological process	11	210	410	14742	1.88341	0.033166	0.273411	1.47931	KIAA1324//CHEK1//IRF1//MAP3K1//MAP3K2//CCNE1//VLDLR//NTRK3//SLC6A4//WNT3A//IL15
GO:0043966	histone H3 acetylation	Biological process	4	44	410	14742	3.26874	0.0333841	0.274149	1.47646	CHEK1//TCF3//PHF15//BRPF3
GO:0043967	histone H4 acetylation	Biological process	4	44	410	14742	3.26874	0.0333841	0.274149	1.47646	PHF15//MLL//TCF3//ING3
GO:0046039	GTP metabolic process	Biological process	17	375	410	14742	1.63001	0.0335628	0.275086	1.47414	RHOC//CDC42//GNAQ//RAB5C//SAR1B//SMAP1//BVES//BCL6//CRK//MAP2K1//RASA1//RASGRF1//SOS1//EPHA2//FGD4//FGD5//SNX13
GO:0072511	divalent inorganic cation transport	Biological process	13	264	410	14742	1.77057	0.0336679	0.275136	1.47278	KCNN4//TRPV6//P2RX4//FKBP1B//TUSC3//BBC3//DIAPH1//SNCA//CAMK2G//CACNA1E//RHOC//WFS1//ATP2A2
GO:0010769	regulation of cell morphogenesis involved in differentiation	Biological process	9	159	410	14742	2.03525	0.0337626	0.275136	1.47156	BAMBI//SMAD7//WNT7A//TCF7L2//OMG//NTRK3//TNR//WNT3A//NUMBL
GO:0018108	peptidyl-tyrosine phosphorylation	Biological process	9	159	410	14742	2.03525	0.0337626	0.275136	1.47156	IRF1//IL15//PPP2R1A//SOCS1//RELN//VEGFA//FGFR2//WEE1//ABI2
GO:0009887	organ morphogenesis	Biological process	28	699	410	14742	1.4403	0.0338365	0.275212	1.47061	ROR2//LRP6//HAND1//SOX17//WNT3A//VEGFA//FGFR2//ZFPM2//CARM1//TFAP2B//EPHA2//CDC42//CCNE1//SOCS1//EDA//LRP4//LHX8//WNT7A//GDF11//EGLN1//SMAD7//VSX1//ESR1//KIF26B//FBXW7//NFIB//CRKL//FLI1
GO:0002792	negative regulation of peptide secretion	Biological process	3	26	410	14742	4.14878	0.0345764	0.277015	1.46122	PDE3B//SIRT4//SYTL4
GO:0021532	neural tube patterning	Biological process	3	26	410	14742	4.14878	0.0345764	0.277015	1.46122	SOX17//WNT3A//LRP6
GO:0033205	cell cycle cytokinesis	Biological process	3	26	410	14742	4.14878	0.0345764	0.277015	1.46122	CDC42//PKN2//RHOC
GO:0051924	regulation of calcium ion transport	Biological process	8	135	410	14742	2.13073	0.0349216	0.277015	1.45691	P2RX4//FKBP1B//DIAPH1//SNCA//CACNA1E//RHOC//WFS1//CAMK2G
GO:0007155	cell adhesion	Biological process	35	916	410	14742	1.37387	0.0350044	0.277015	1.45588	ROR2//NLGN1//BCL6//RASA1//CASK//TNR//EDA//PDE3B//TGFBI//SMAD7//KIF26B//IL8//LAMA3//PPP2R1A//EPHA2//MAP2K1//BVES//ALOX12//RHOC//VEGFA//ACTN1//TAOK2//STXBP3//WNT3A//CDC42//APP//ATP2A2//MFAP4//OMG//PKN2//RELN//ZYX//FBLIM1//AJAP1//SVEP1
GO:0022610	biological adhesion	Biological process	35	916	410	14742	1.37387	0.0350044	0.277015	1.45588	ROR2//NLGN1//BCL6//RASA1//CASK//APP//ATP2A2//EPHA2//MFAP4//OMG//PKN2//RELN//TNR//ZYX//BVES//FBLIM1//AJAP1//SVEP1//EDA//PDE3B//TGFBI//SMAD7//KIF26B//IL8//LAMA3//PPP2R1A//MAP2K1//ALOX12//RHOC//VEGFA//ACTN1//TAOK2//STXBP3//WNT3A//CDC42
GO:0018394	peptidyl-lysine acetylation	Biological process	7	111	410	14742	2.2675	0.0352698	0.277015	1.4526	SNCA//TCF3//PHF15//BRPF3//ING3//MLL//CHEK1
GO:0048738	cardiac muscle tissue development	Biological process	7	111	410	14742	2.2675	0.0352698	0.277015	1.4526	ZFPM2//VEGFA//EGLN1//FGFR2//SMAD7//HAND1//LRP6
GO:0009057	macromolecule catabolic process	Biological process	31	794	410	14742	1.40383	0.0357033	0.277015	1.44729	PPP2R1A//UPF3A//WIBG//MAP3K1//SIAH1//ARIH2//LSM5//XPC//UBE2B//UBE2H//UCHL1//CUL2//CDC23//USP34//USP19//FBXL4//USP53//USP47//USP46//USP27X//HTRA2//WFS1//DERL2//PSMD7//FBXW7//SMAD7//CDC42//APH1A//PSENEN//PCBP2//SOX17
GO:0045727	positive regulation of translation	Biological process	4	45	410	14742	3.1961	0.0358652	0.277015	1.44533	EIF2B5//RHOC//UPF3A//WIBG
GO:0061387	regulation of extent of cell growth	Biological process	4	45	410	14742	3.1961	0.0358652	0.277015	1.44533	OMG//NTRK3//TNR//WNT3A
GO:0032886	regulation of microtubule-based process	Biological process	6	88	410	14742	2.45155	0.0358659	0.277015	1.44532	KATNB1//SNCA//CHEK1//CDC42//WNT3A//DIAPH1
GO:2000243	positive regulation of reproductive process	Biological process	6	88	410	14742	2.45155	0.0358659	0.277015	1.44532	TARBP2//MAP3K1//RDBP//TH1L//RSF1//ZFPM2
GO:0007517	muscle organ development	Biological process	14	294	410	14742	1.7122	0.0359435	0.277015	1.44438	ZFPM2//DYRK1B//MBNL3//USP19//SOX17//APP//LRP4//EGLN1//FGFR2//SMAD7//HAND1//LRP6//SCN8A//BVES
GO:0000085	G2 phase of mitotic cell cycle	Biological process	2	11	410	14742	6.53747	0.0359474	0.277015	1.44433	APP//KPNA2
GO:0007223	Wnt receptor signaling pathway, calcium modulating pathway	Biological process	2	11	410	14742	6.53747	0.0359474	0.277015	1.44433	ROR2//WNT3A
GO:0016558	protein import into peroxisome matrix	Biological process	2	11	410	14742	6.53747	0.0359474	0.277015	1.44433	PEX13//PEX5L
GO:0030917	midbrain-hindbrain boundary development	Biological process	2	11	410	14742	6.53747	0.0359474	0.277015	1.44433	LRP6//WNT3A
GO:0031293	membrane protein intracellular domain proteolysis	Biological process	2	11	410	14742	6.53747	0.0359474	0.277015	1.44433	APH1A//PSENEN
GO:0032793	positive regulation of CREB transcription factor activity	Biological process	2	11	410	14742	6.53747	0.0359474	0.277015	1.44433	VEGFA//CRTC2
GO:0042987	amyloid precursor protein catabolic process	Biological process	2	11	410	14742	6.53747	0.0359474	0.277015	1.44433	APH1A//PSENEN
GO:0044065	regulation of respiratory system process	Biological process	2	11	410	14742	6.53747	0.0359474	0.277015	1.44433	NLGN1//TSHZ3
GO:0045920	negative regulation of exocytosis	Biological process	2	11	410	14742	6.53747	0.0359474	0.277015	1.44433	STXBP3//SNCA
GO:0050930	induction of positive chemotaxis	Biological process	2	11	410	14742	6.53747	0.0359474	0.277015	1.44433	IL8//VEGFA
GO:0051319	G2 phase	Biological process	2	11	410	14742	6.53747	0.0359474	0.277015	1.44433	APP//KPNA2
GO:0060736	prostate gland growth	Biological process	2	11	410	14742	6.53747	0.0359474	0.277015	1.44433	ESR1//FGFR2
GO:0060911	cardiac cell fate commitment	Biological process	2	11	410	14742	6.53747	0.0359474	0.277015	1.44433	WNT3A//SOX17
GO:0071425	hemopoietic stem cell proliferation	Biological process	2	11	410	14742	6.53747	0.0359474	0.277015	1.44433	ARIH2//WNT3A
GO:0090136	epithelial cell-cell adhesion	Biological process	2	11	410	14742	6.53747	0.0359474	0.277015	1.44433	CDC42//BVES
GO:0010959	regulation of metal ion transport	Biological process	9	161	410	14742	2.00997	0.0361381	0.277015	1.44203	P2RX4//FKBP1B//DIAPH1//SNCA//CAMK2G//CACNA1E//RHOC//WFS1//SCN1B
GO:0018212	peptidyl-tyrosine modification	Biological process	9	161	410	14742	2.00997	0.0361381	0.277015	1.44203	FGFR2//RELN//WEE1//ABI2//IRF1//IL15//PPP2R1A//SOCS1//VEGFA
GO:0050804	regulation of synaptic transmission	Biological process	9	161	410	14742	2.00997	0.0361381	0.277015	1.44203	SNCA//SLC6A4//NISCH//USP46//SNCG//RASGRF1//TNR//NLGN1//PXK
GO:0051222	positive regulation of protein transport	Biological process	8	136	410	14742	2.11506	0.0362444	0.277332	1.44076	BAMBI//WNT3A//EDA//TCF7L2//KCNN4//EXPH5//SYTL4//IL1A
GO:0040014	regulation of multicellular organism growth	Biological process	5	66	410	14742	2.72395	0.0363836	0.27764	1.43909	ATXN2//APP//FGFR2//ATRN//HTRA2
GO:0031644	regulation of neurological system process	Biological process	10	187	410	14742	1.92279	0.0364707	0.27764	1.43806	SNCA//SLC6A4//NISCH//USP46//SNCG//RASGRF1//NLGN1//PXK//TNR//IL1A
GO:0040012	regulation of locomotion	Biological process	17	379	410	14742	1.61281	0.0365453	0.27764	1.43717	VEGFA//ALOX12//KRIT1//LAMA3//MAP3K1//RHOC//ROR2//MAP2K1//SMAD7//TIE1//NISCH//BVES//EPHA2//WNT3A//IL8//PKN2//SNCA
GO:0044419	interspecies interaction between organisms	Biological process	17	379	410	14742	1.61281	0.0365453	0.27764	1.43717	NTRK3//CCNT2//KPNA2//TBP//ZYX//CUL2//AP1M1//SYNCRIP//CARM1//IPO7//SPEN//WAPAL//SEPT6//FBXL2//FBXW7//NLRX1//CRTC2
GO:0031344	regulation of cell projection organization	Biological process	11	214	410	14742	1.84821	0.0372519	0.282504	1.42885	EPHA2//KATNB1//TNR//WNT3A//WNT7A//CDC42//OMG//NTRK3//RHOC//NUMBL//NLGN1
GO:0008585	female gonad development	Biological process	6	89	410	14742	2.42401	0.0375957	0.2832	1.42486	VEGFA//EIF2B5//CCNE1//ESR1//ZFPM2//LHX8
GO:0033500	carbohydrate homeostasis	Biological process	6	89	410	14742	2.42401	0.0375957	0.2832	1.42486	CACNA1E//PDE3B//TCF7L2//TFAP2B//WFS1//CRTC2
GO:0042593	glucose homeostasis	Biological process	6	89	410	14742	2.42401	0.0375957	0.2832	1.42486	CACNA1E//PDE3B//TCF7L2//TFAP2B//WFS1//CRTC2
GO:0043269	regulation of ion transport	Biological process	10	188	410	14742	1.91256	0.0376094	0.2832	1.4247	P2RX4//FKBP1B//PXK//DIAPH1//SNCA//CAMK2G//CACNA1E//RHOC//WFS1//SCN1B
GO:0051960	regulation of nervous system development	Biological process	17	381	410	14742	1.60434	0.0381071	0.284527	1.41899	KATNB1//TNR//WNT3A//SLC6A4//WNT7A//NLGN1//APP//RHOC//PHOX2B//GDF11//CTDSP1//TCF3//OMG//NTRK3//NUMBL//SPEN//LRP6
GO:0021575	hindbrain morphogenesis	Biological process	3	27	410	14742	3.99512	0.0381194	0.284527	1.41885	LRP6//ATXN2//WNT7A
GO:0022409	positive regulation of cell-cell adhesion	Biological process	3	27	410	14742	3.99512	0.0381194	0.284527	1.41885	WNT3A//SMAD7//KIF26B
GO:0048278	vesicle docking	Biological process	3	27	410	14742	3.99512	0.0381194	0.284527	1.41885	STXBP3//VPS33B//SYTL2
GO:2001235	positive regulation of apoptotic signaling pathway	Biological process	3	27	410	14742	3.99512	0.0381194	0.284527	1.41885	SIAH1//BBC3//HTRA2
GO:0051704	multi-organism process	Biological process	37	985	410	14742	1.35064	0.0381942	0.284554	1.418	APP//PEX13//IL8//IKBKB//ODC1//PCBP2//POLR3G//IRF1//CARM1//NTRK3//IL1A//KCNJ8//SNCA//TCF3//TIMP4//SOCS1//SLC6A4//CCNT2//KPNA2//TBP//ZYX//CUL2//AP1M1//SYNCRIP//IPO7//SPEN//WAPAL//SEPT6//FBXL2//FBXW7//NLRX1//CRTC2//TARBP2//AP2A1//IL15//ESR1//VLDLR
GO:0030029	actin filament-based process	Biological process	18	410	410	14742	1.57856	0.0383345	0.284554	1.41641	ACTN1//CDC42//BCL6//DIAPH1//TAOK2//NISCH//FGD4//FGD5//RHOC//ABI2//TPM4//PAK3//RASA1//MAP3K1//CNN1//MYO18A//CRK//SPTBN2
GO:0071300	cellular response to retinoic acid	Biological process	4	46	410	14742	3.12662	0.0384501	0.284554	1.4151	IRF1//NTRK3//SLC6A4//WNT3A
GO:0046782	regulation of viral transcription	Biological process	5	67	410	14742	2.68329	0.0384568	0.284554	1.41503	MAP3K1//RDBP//TH1L//RSF1//TARBP2
GO:0090090	negative regulation of canonical Wnt receptor signaling pathway	Biological process	5	67	410	14742	2.68329	0.0384568	0.284554	1.41503	LRP4//ROR2//TCF7L2//LATS2//SOX17
GO:0009150	purine ribonucleotide metabolic process	Biological process	22	528	410	14742	1.49817	0.0390639	0.288545	1.40822	IMPDH1//RHOC//CDC42//GNAQ//RAB5C//SAR1B//ACLY//KIF1B//RNF213//ATP2A2//SMAP1//BVES//BCL6//CRK//MAP2K1//RASA1//RASGRF1//SOS1//EPHA2//FGD4//FGD5//SNX13
GO:0044249	cellular biosynthetic process	Biological process	149	4746	410	14742	1.12884	0.0393921	0.290466	1.40459	CDC25A//CHEK1//MCM3//NFIB//CCNE1//BCL6//CDKN1C//EZH1//FGFR2//HIVEP1//SMAD7//PTH//TCF7L2//TFAP2B//TLE4//MBD2//HAND1//NCOR2//SPEN//ZFPM2//SALL4//SOX17//CCNT2//IRF1//MLL//NFATC3//ARID4A//TBP//RDBP//COPS2//TRIP11//AFF4//TH1L//POLR3G//CRTC2//IMPDH1//TFAM//PPP2R1A//SIRT4//ESR1//MLF1//TCF3//MYNN//RSF1//RUNX1T1//ELAVL2//FLI1//HDGF//NDN//NONO//POU3F1//PKN2//TARBP2//TMPO//ZFX//JRKL//PHOX2B//DENND4A//YAP1//…
GO:0008104	protein localization	Biological process	51	1434	410	14742	1.27877	0.0397964	0.292458	1.40016	TRIP11//BCL6//BBC3//IPO7//KATNB1//YWHAQ//NLGN1//KPNA2//TAOK2//NAGPA//AP2A1//CTSA//STX5//AP1M1//EXPH5//SNX13//TNPO2//SAR1B//SYTL2//SYTL4//WNT7A//PEX13//RAB5C//STXBP3//RANBP3//RABEP1//STXBP5L//VPS33B//SNX14//AKTIP//SNX21//PEX5L//DERL2//FBXW7//VLDLR//CDC42//LATS2//WNT3A//SMAD7//DIAPH1//GNAQ//BAMBI//EDA//LRP4//DUSP16//TCF7L2//KCNN4//IL1A//WFS1//WAPAL//EPHA2
GO:0006475	internal protein amino acid acetylation	Biological process	7	114	410	14742	2.20783	0.0398682	0.292458	1.39937	SNCA//TCF3//PHF15//BRPF3//ING3//MLL//CHEK1
GO:0043414	macromolecule methylation	Biological process	7	114	410	14742	2.20783	0.0398682	0.292458	1.39937	PCMT1//SETD3//CARM1//MLL3//SUV420H2//EZH1//MLL
GO:0031669	cellular response to nutrient levels	Biological process	8	139	410	14742	2.06942	0.0404145	0.295209	1.39346	KIAA1324//CCNE1//VLDLR//IRF1//NTRK3//SLC6A4//WNT3A//IL15
GO:0051258	protein polymerization	Biological process	8	139	410	14742	2.06942	0.0404145	0.295209	1.39346	DIAPH1//PAK3//RASA1//RHOC//MAP3K1//SNCA//SPTBN2//TUBA1A
GO:0042493	response to drug	Biological process	15	327	410	14742	1.64936	0.0404535	0.295209	1.39304	MLL//RHOC//CCNE1//EMX1//SLC6A4//SMPD1//SNCA//TCF3//TIMP4//UBE2B//VLDLR//XPC//BCAR3//SOCS1//USP47
GO:0046425	regulation of JAK-STAT cascade	Biological process	5	68	410	14742	2.64383	0.0406008	0.295209	1.39147	NLK//IRF1//IL15//PPP2R1A//SOCS1
GO:0000080	G1 phase of mitotic cell cycle	Biological process	4	47	410	14742	3.06009	0.0411389	0.295209	1.38575	CDKN1C//MAP3K11//TCF3//CDC23
GO:0051209	release of sequestered calcium ion into cytosol	Biological process	4	47	410	14742	3.06009	0.0411389	0.295209	1.38575	FKBP1B//DIAPH1//SNCA//BBC3
GO:0051282	regulation of sequestering of calcium ion	Biological process	4	47	410	14742	3.06009	0.0411389	0.295209	1.38575	FKBP1B//BBC3//DIAPH1//SNCA
GO:0051283	negative regulation of sequestering of calcium ion	Biological process	4	47	410	14742	3.06009	0.0411389	0.295209	1.38575	FKBP1B//BBC3//DIAPH1//SNCA
GO:0060443	mammary gland morphogenesis	Biological process	4	47	410	14742	3.06009	0.0411389	0.295209	1.38575	EPHA2//LRP6//FGFR2//ESR1
GO:0071299	cellular response to vitamin A	Biological process	4	47	410	14742	3.06009	0.0411389	0.295209	1.38575	IRF1//NTRK3//SLC6A4//WNT3A
GO:0071453	cellular response to oxygen levels	Biological process	4	47	410	14742	3.06009	0.0411389	0.295209	1.38575	VEGFA//VLDLR//BBC3//USP19
GO:0030855	epithelial cell differentiation	Biological process	13	272	410	14742	1.71849	0.0412034	0.295209	1.38507	ESR1//CDC42//WNT7A//EPHA2//POU3F1//MAP2K1//LATS2//IL1A//ALOX12//NFIB//FGFR2//SOX17//VEGFA
GO:0032271	regulation of protein polymerization	Biological process	6	91	410	14742	2.37073	0.0412128	0.295209	1.38497	PAK3//RASA1//RHOC//MAP3K1//SNCA//SPTBN2
GO:0050792	regulation of viral reproduction	Biological process	6	91	410	14742	2.37073	0.0412128	0.295209	1.38497	TARBP2//IL8//MAP3K1//RDBP//TH1L//RSF1
GO:0000075	cell cycle checkpoint	Biological process	12	245	410	14742	1.76111	0.0416381	0.295464	1.38051	CHEK1//PSMD7//PCBP4//RFWD2//CDC23//TAOK2//TAOK3//XPC//CDC25A//MCM3//WEE1//WAC
GO:0003008	system process	Biological process	55	1568	410	14742	1.26122	0.0416703	0.295464	1.38017	SNCA//CACNA1E//NLGN1//TSHZ3//NDN//CORIN//MAP2K1//DDAH1//TFAP2B//WFS1//HAS2//FKBP1B//TPM4//CNN1//AP2A1//CAMK2G//GABRB3//KCNJ8//KCNMA1//KCNN4//LRP6//RASGRF1//SCN1B//KCNH3//GLS2//WNT7A//KIF1B//TGFBI//VSX1//DIAPH1//LHX8//SLC6A4//VLDLR//P2RX4//NISCH//TNR//POU3F1//APP//IL15//USP19//USP46//SCN8A//EIF2B5//VEGFA//RHOC//SNCG//ITSN1//PXK//TUSC3//SLC5A1//ATXN2//UCHL1//PEX5L//IL1A//SMAD7
GO:0010812	negative regulation of cell-substrate adhesion	Biological process	3	28	410	14742	3.85244	0.04184	0.295464	1.37841	BCL6//RASA1//CASK
GO:0031103	axon regeneration	Biological process	3	28	410	14742	3.85244	0.04184	0.295464	1.37841	OMG//NTRK3//TNR
GO:0033059	cellular pigmentation	Biological process	3	28	410	14742	3.85244	0.04184	0.295464	1.37841	VPS33B//MAP2K1//AP1M1
GO:0051057	positive regulation of small GTPase mediated signal transduction	Biological process	3	28	410	14742	3.85244	0.04184	0.295464	1.37841	MAP2K1//RASGRF1//RELN
GO:0060079	regulation of excitatory postsynaptic membrane potential	Biological process	3	28	410	14742	3.85244	0.04184	0.295464	1.37841	NLGN1//P2RX4//SNCA
GO:0009205	purine ribonucleoside triphosphate metabolic process	Biological process	21	503	410	14742	1.50115	0.0423498	0.295464	1.37315	RHOC//CDC42//GNAQ//RAB5C//SAR1B//ACLY//KIF1B//RNF213//ATP2A2//SMAP1//BVES//BCL6//CRK//MAP2K1//RASA1//RASGRF1//SOS1//EPHA2//FGD4//FGD5//SNX13
GO:0002832	negative regulation of response to biotic stimulus	Biological process	2	12	410	14742	5.99268	0.0423576	0.295464	1.37307	PCBP2//TARBP2
GO:0007158	neuron cell-cell adhesion	Biological process	2	12	410	14742	5.99268	0.0423576	0.295464	1.37307	TNR//NLGN1
GO:0010454	negative regulation of cell fate commitment	Biological process	2	12	410	14742	5.99268	0.0423576	0.295464	1.37307	WNT3A//SOX17
GO:0015874	norepinephrine transport	Biological process	2	12	410	14742	5.99268	0.0423576	0.295464	1.37307	NISCH//SNCA
GO:0032225	regulation of synaptic transmission, dopaminergic	Biological process	2	12	410	14742	5.99268	0.0423576	0.295464	1.37307	SLC6A4//SNCA
GO:0060291	long-term synaptic potentiation	Biological process	2	12	410	14742	5.99268	0.0423576	0.295464	1.37307	SNCA//TNR
GO:0060438	trachea development	Biological process	2	12	410	14742	5.99268	0.0423576	0.295464	1.37307	LRP6//EDA
GO:0060525	prostate glandular acinus development	Biological process	2	12	410	14742	5.99268	0.0423576	0.295464	1.37307	ESR1//FGFR2
GO:0009890	negative regulation of biosynthetic process	Biological process	35	931	410	14742	1.35173	0.042632	0.296891	1.37026	BCL6//CDKN1C//EZH1//FGFR2//HIVEP1//SMAD7//NFIB//PTH//TCF7L2//TFAP2B//TLE4//MBD2//HAND1//NCOR2//SPEN//ZFPM2//SALL4//SOX17//SIRT4//UBE2B//WAPAL//TSPYL2//FBXW7//ARID4A//DEDD//YWHAQ//TH1L//RSF1//USP47//TSHZ3//HMBOX1//KCTD1//EIF2B5//MARCH8//ENPP1
GO:0001764	neuron migration	Biological process	5	69	410	14742	2.60551	0.042816	0.297524	1.36839	NDN//NTRK3//PEX13//RELN//PHOX2B
GO:0009199	ribonucleoside triphosphate metabolic process	Biological process	21	504	410	14742	1.49817	0.0430995	0.297524	1.36553	RHOC//CDC42//GNAQ//RAB5C//SAR1B//ACLY//KIF1B//RNF213//ATP2A2//SMAP1//BVES//BCL6//CRK//MAP2K1//RASA1//RASGRF1//SOS1//EPHA2//FGD4//FGD5//SNX13
GO:0010948	negative regulation of cell cycle process	Biological process	6	92	410	14742	2.34496	0.043101	0.297524	1.36551	CDC23//USP47//FBXW7//BCL6//CHEK1//WAPAL
GO:0042476	odontogenesis	Biological process	6	92	410	14742	2.34496	0.043101	0.297524	1.36551	EDA//LRP4//LRP6//HAND1//LHX8//FGFR2
GO:0035107	appendage morphogenesis	Biological process	7	116	410	14742	2.16976	0.0431416	0.297524	1.3651	LRP6//SALL4//TFAP2B//WNT7A//GNAQ//LRP4//FGFR2
GO:0035108	limb morphogenesis	Biological process	7	116	410	14742	2.16976	0.0431416	0.297524	1.3651	LRP6//SALL4//TFAP2B//WNT7A//GNAQ//LRP4//FGFR2
GO:0045767	regulation of anti-apoptosis	Biological process	4	48	410	14742	2.99634	0.0439317	0.301995	1.35722	SMAD7//RASA1//RTKN//SERBP1
GO:0051650	establishment of vesicle localization	Biological process	4	48	410	14742	2.99634	0.0439317	0.301995	1.35722	STX5//NLGN1//MAP2K1//SAR1B
GO:0051253	negative regulation of RNA metabolic process	Biological process	29	748	410	14742	1.39402	0.0445211	0.305554	1.35143	BCL6//CDKN1C//EZH1//FGFR2//HIVEP1//SMAD7//NFIB//PTH//TCF7L2//TFAP2B//TLE4//MBD2//HAND1//NCOR2//SPEN//ZFPM2//SALL4//SOX17//SIRT4//UBE2B//ARID4A//DEDD//YWHAQ//TH1L//RSF1//USP47//TSHZ3//HMBOX1//KCTD1
GO:0030001	metal ion transport	Biological process	24	596	410	14742	1.4479	0.0447811	0.306765	1.34891	P2RX4//KCNJ8//KCNMA1//KCNN4//KCNH3//KCTD1//KCTD8//SCN1B//SCN8A//SLC5A1//SLC5A6//TRPV6//HEPHL1//FKBP1B//TUSC3//SLC22A17//BBC3//DIAPH1//SNCA//CAMK2G//CACNA1E//RHOC//WFS1//ATP2A2
GO:0006898	receptor-mediated endocytosis	Biological process	7	117	410	14742	2.15122	0.0448416	0.306765	1.34832	WNT3A//IL8//SNCA//LRP6//LRP2//M6PR//VLDLR
GO:0006984	ER-nucleus signaling pathway	Biological process	6	93	410	14742	2.31975	0.0450425	0.307072	1.34638	WFS1//HDGF//IL8//TSPYL2//DERL2//FBXW7
GO:0001704	formation of primary germ layer	Biological process	5	70	410	14742	2.56829	0.0451025	0.307072	1.3458	DUSP2//SOX17//HAND1//EPHA2//WNT3A
GO:0006368	transcription elongation from RNA polymerase II promoter	Biological process	5	70	410	14742	2.56829	0.0451025	0.307072	1.3458	MAP2K1//CCNT2//TBP//RDBP//TH1L
GO:0009144	purine nucleoside triphosphate metabolic process	Biological process	21	507	410	14742	1.48931	0.0454067	0.30865	1.34288	RHOC//CDC42//GNAQ//RAB5C//SAR1B//ACLY//KIF1B//RNF213//ATP2A2//SMAP1//BVES//BCL6//CRK//MAP2K1//RASA1//RASGRF1//SOS1//EPHA2//FGD4//FGD5//SNX13
GO:0033043	regulation of organelle organization	Biological process	18	419	410	14742	1.54465	0.0456941	0.309407	1.34014	KATNB1//CDC42//CDC23//RHOC//PAK3//RASA1//MAP3K1//UBE2B//SNCA//CRK//KIAA1324//CHEK1//IL1A//WAPAL//SPTBN2//WNT3A//MAP2K1//BBC3
GO:0042516	regulation of tyrosine phosphorylation of Stat3 protein	Biological process	3	29	410	14742	3.7196	0.0457359	0.309407	1.33974	IL15//PPP2R1A//SOCS1
GO:0060042	retina morphogenesis in camera-type eye	Biological process	3	29	410	14742	3.7196	0.0457359	0.309407	1.33974	TFAP2B//VSX1//LRP6
GO:0006810	transport	Biological process	109	3387	410	14742	1.15713	0.0459719	0.310511	1.33751	TRIP11//BCL6//SNCA//P2RX4//WNT3A//ACTN1//APP//VEGFA//BRPF3//SPTBN2//STXBP3//AP1M1//BVES//VPS33B//SAR1B//SYTL2//IPO7//VAMP8//STX5//NLGN1//KATNB1//YWHAQ//KPNA2//TAOK2//NAGPA//CACNA1E//GABRE//KCNJ8//KCNMA1//KCNN4//SCN1B//SCN8A//SLC5A1//SLC5A6//KCNH3//SLCO3A1//SLC22A17//TRPV6//HEPHL1//ATP2A2//KCTD1//KCTD8//UCP2//GABRB3//SLC6A4//VLDLR//OSBPL3//AP2A1//CTSA//EXPH5//SNX13//TNPO2//SYTL4//STXBP5L//LRP2//LR…
GO:0009259	ribonucleotide metabolic process	Biological process	22	538	410	14742	1.47032	0.0463252	0.312402	1.33418	IMPDH1//RHOC//CDC42//GNAQ//RAB5C//SAR1B//ACLY//KIF1B//RNF213//ATP2A2//SMAP1//BVES//BCL6//CRK//MAP2K1//RASA1//RASGRF1//SOS1//EPHA2//FGD4//FGD5//SNX13
GO:0051640	organelle localization	Biological process	8	143	410	14742	2.01153	0.0464548	0.312435	1.33297	STX5//NLGN1//CDC23//CDC42//VPS33B//MAP2K1//SAR1B//PEX13
GO:0048568	embryonic organ development	Biological process	13	277	410	14742	1.68747	0.0464768	0.312435	1.33276	EPHA2//ROR2//WNT3A//FGFR2//MLL//IL8//LRP6//VEGFA//HAND1//MAP2K1//EGLN1//ZFPM2//SOX17
GO:0015844	monoamine transport	Biological process	4	49	410	14742	2.93519	0.0468284	0.314304	1.32949	SLC6A4//SNCA//SNCG//NISCH
GO:0030216	keratinocyte differentiation	Biological process	6	94	410	14742	2.29507	0.0470378	0.314718	1.32755	CDC42//IL1A//EPHA2//POU3F1//MAP2K1//LATS2
GO:0030902	hindbrain development	Biological process	6	94	410	14742	2.29507	0.0470378	0.314718	1.32755	PHOX2B//LRP6//ATXN2//WNT7A//SLC6A4//NFIB
GO:0002831	regulation of response to biotic stimulus	Biological process	5	71	410	14742	2.53212	0.0474607	0.315857	1.32367	PCBP2//TARBP2//AP2A1//AP1M1//IL15
GO:0050680	negative regulation of epithelial cell proliferation	Biological process	5	71	410	14742	2.53212	0.0474607	0.315857	1.32367	KRIT1//FBXW7//NFIB//CDKN1C//LRP6
GO:0003001	generation of a signal involved in cell-cell signaling	Biological process	14	306	410	14742	1.64505	0.0475045	0.315857	1.32327	SNCA//NLGN1//WNT7A//GLS2//CACNA1E//TFAP2B//SNCG//CAMK2G//FKBP1B//TCF7L2//PDE3B//SIRT4//SYTL4//PEX5L
GO:0023061	signal release	Biological process	14	306	410	14742	1.64505	0.0475045	0.315857	1.32327	SNCA//NLGN1//WNT7A//GLS2//CACNA1E//TFAP2B//SNCG//CAMK2G//FKBP1B//TCF7L2//PDE3B//SIRT4//SYTL4//PEX5L
GO:0006470	protein dephosphorylation	Biological process	8	144	410	14742	1.99756	0.0480523	0.319001	1.31829	SMPD1//DUSP2//PTPN21//PPP2R1A//PPP6C//CTDSP1//DUSP16//PPM1M
GO:0045184	establishment of protein localization	Biological process	43	1196	410	14742	1.29274	0.0489297	0.320837	1.31043	TRIP11//BCL6//BBC3//IPO7//KATNB1//YWHAQ//NLGN1//KPNA2//TAOK2//NAGPA//AP2A1//CTSA//STX5//AP1M1//EXPH5//SNX13//TNPO2//SAR1B//SYTL2//SYTL4//PEX13//RAB5C//STXBP3//RANBP3//RABEP1//STXBP5L//VPS33B//SNX14//AKTIP//SNX21//PEX5L//DERL2//VLDLR//GNAQ//BAMBI//WNT3A//EDA//DUSP16//TCF7L2//KCNN4//IL1A//WFS1//EPHA2
GO:0034976	response to endoplasmic reticulum stress	Biological process	6	95	410	14742	2.27091	0.0490871	0.320837	1.30903	WFS1//HDGF//IL8//TSPYL2//DERL2//USP19
GO:0048638	regulation of developmental growth	Biological process	6	95	410	14742	2.27091	0.0490871	0.320837	1.30903	CARM1//OMG//NTRK3//TNR//WNT3A//FGFR2
GO:0003215	cardiac right ventricle morphogenesis	Biological process	2	13	410	14742	5.53171	0.0491569	0.320837	1.30842	HAND1//ZFPM2
GO:0006884	cell volume homeostasis	Biological process	2	13	410	14742	5.53171	0.0491569	0.320837	1.30842	KCNMA1//KCNN4
GO:0051962	positive regulation of nervous system development	Biological process	2	13	410	14742	5.53171	0.0491569	0.320837	1.30842	WNT7A//NLGN1
GO:0051965	positive regulation of synapse assembly	Biological process	2	13	410	14742	5.53171	0.0491569	0.320837	1.30842	WNT7A//NLGN1
GO:0060065	uterus development	Biological process	2	13	410	14742	5.53171	0.0491569	0.320837	1.30842	WNT7A//ESR1
GO:0060442	branching involved in prostate gland morphogenesis	Biological process	2	13	410	14742	5.53171	0.0491569	0.320837	1.30842	ESR1//FGFR2
GO:0071775	regulation of cell cycle cytokinesis	Biological process	2	13	410	14742	5.53171	0.0491569	0.320837	1.30842	CDC42//PKN2
GO:0071777	positive regulation of cell cycle cytokinesis	Biological process	2	13	410	14742	5.53171	0.0491569	0.320837	1.30842	CDC42//PKN2
GO:0002053	positive regulation of mesenchymal cell proliferation	Biological process	3	30	410	14742	3.59561	0.0498047	0.321199	1.30273	FGFR2//LRP6//VEGFA
GO:0031572	G2/M transition DNA damage checkpoint	Biological process	3	30	410	14742	3.59561	0.0498047	0.321199	1.30273	CHEK1//TAOK2//TAOK3
GO:0050432	catecholamine secretion	Biological process	3	30	410	14742	3.59561	0.0498047	0.321199	1.30273	SNCA//SNCG//NISCH
GO:0060711	labyrinthine layer development	Biological process	3	30	410	14742	3.59561	0.0498047	0.321199	1.30273	FGFR2//MAP2K1//EGLN1
GO:0042509	regulation of tyrosine phosphorylation of STAT protein	Biological process	4	50	410	14742	2.87649	0.0498288	0.321199	1.30252	IRF1//IL15//PPP2R1A//SOCS1
GO:0051208	sequestering of calcium ion	Biological process	4	50	410	14742	2.87649	0.0498288	0.321199	1.30252	FKBP1B//BBC3
GO:0051318	G1 phase	Biological process	4	50	410	14742	2.87649	0.0498288	0.321199	1.30252	CDKN1C//MAP3K11//TCF3//CDC23
GO:0006944	cellular membrane fusion	Biological process	5	72	410	14742	2.49695	0.0498907	0.321199	1.30198	VAMP8//TIE1//STX5//RABEP1//VPS33B
GO:0017157	regulation of exocytosis	Biological process	5	72	410	14742	2.49695	0.0498907	0.321199	1.30198	TRPV6//SNCA//EXPH5//SYTL4//STXBP3

## Sheet: down-CC
#Column "GO.ID" stands for the ID of gene ontology term
#Column "Term" stands for the name of gene ontology term
#Column "Ontology" stands for the ontology of GOID belongs to
#Column "Count" stands for the number of DE genes associated with the listed GOID
#Column "Pop.Hits" stands for the number of background population genes associated with the listed GOID
#Column "List.Total" stands for the total number of DE genes
#Column "Pop.Total" stands for the total number of background population genes
#Column "Fold.Enrichment" stands for the Fold Enrichment value of the GOID, it equals (Count/Pop.Hits)/(List.Total/Pop.Total)
#Column "Pvalue" stands for the significance testing value of the GOID
#Column "FDR" stands for the false discovery rate of the GOID, using Benjamini & Hochberg (1995) method
#Column "Enrichment.Score" stands for the Enrichment Score value of the GOID, it equals (-log10(Pvalue))
#Column "GENES" stands for the DE genes associated with the GOID
GO.ID	Term	Ontology	Count	Pop.Hits	List.Total	Pop.Total	Fold.Enrichment	Pvalue	FDR	Enrichment.Score	GENES
GO:0044424	intracellular part	Cellular component	771	11860	963	16875	1.13917	9.08577e-13	5.06077e-10	12.0416	MBD2//TBL1XR1//PHF15//ATXN7L3//TRIM23//CDC42//CLCN5//GALNT3//MFNG//NTRK3//SREBF2//STX5//CHST1//B4GALT3//AP1M1//SLC33A1//HS3ST2//ST6GALNAC4//ZDHHC9//RAB14//MAN1C1//ARHGAP21//NDFIP1//GYLTL1B//GOLT1A//UBE2E1//UBE2N//BRAP//DYRK2//UBOX5//FBXL5//FBXL4//PRPF19//CBLL1//PPP2CB//PPP2R1A//STRN3//SKIV2L2//RPL23A//FXR2//RPL13A//ATP6V1H//ZNF238//CHEK1//GNAQ//RGS6//CCNE1//PSMD7//TRIP12//PIGH//CENPB//JRKL//STAG2…
GO:0005622	intracellular	Cellular component	782	12155	963	16875	1.12738	7.97205e-12	2.22022e-09	11.0984	MBD2//TBL1XR1//PHF15//ATXN7L3//TRIM23//CDC42//CLCN5//GALNT3//MFNG//NTRK3//SREBF2//STX5//CHST1//B4GALT3//AP1M1//SLC33A1//HS3ST2//ST6GALNAC4//ZDHHC9//RAB14//MAN1C1//ARHGAP21//NDFIP1//GYLTL1B//GOLT1A//UBE2E1//UBE2N//BRAP//DYRK2//UBOX5//FBXL5//FBXL4//PRPF19//CBLL1//PPP2CB//PPP2R1A//STRN3//SKIV2L2//RPL23A//FXR2//RPL13A//ATP6V1H//ZNF238//CHEK1//GNAQ//RGS6//CCNE1//PSMD7//TRIP12//PIGH//CENPB//JRKL//STAG2…
GO:0005634	nucleus	Cellular component	421	5793	963	16875	1.27349	3.14966e-10	5.84787e-08	9.50174	MBD2//TBL1XR1//PHF15//ATXN7L3//ZNF238//CHEK1//SS18L1//SUV420H2//TERF2//TCF3//RARA//UBE2B//LDB1//PHOX2B//WAPAL//SLC2A1//TBP//CBX1//ANXA7//BNIP2//KCNH2//NPC1//RANBP1//TMPO//POM121//DMPK//GUCY2D//TUBB//KPNA1//KPNB1//IPO7//CASK//CAMK4//CAMK2G//CCNE1//CCNT2//CDC25A//DUSP2//DUSP5//E2F5//ELAVL1//ESR1//ESRRA//GTF2H1//HDGF//IRF1//IRF2//KPNA2//MCM3//NR3C2//PCBP1//PCBP2//MAPK3//PSMD7//RELA//RPA2//SNRPA//SUP…
GO:0043226	organelle	Cellular component	671	10236	963	16875	1.14871	1.27904e-09	1.78107e-07	8.89311	MBD2//TBL1XR1//PHF15//ATXN7L3//TRIM23//CDC42//CLCN5//GALNT3//MFNG//NTRK3//SREBF2//STX5//CHST1//B4GALT3//AP1M1//SLC33A1//HS3ST2//ST6GALNAC4//ZDHHC9//RAB14//MAN1C1//ARHGAP21//NDFIP1//GYLTL1B//GOLT1A//RPL23A//FXR2//RPL13A//ATP6V1H//ZNF238//CHEK1//PIGH//CENPB//PPP2CB//PPP2R1A//JRKL//STAG2//CBX1//RCC2//CLASP2//SEPT6//SS18L1//SUV420H2//TERF2//MYCN//TMPO//UBE2B//WAPAL//ASF1B//H2AFZ//SHPRH//TCF3//RARA//L…
GO:0043229	intracellular organelle	Cellular component	669	10221	963	16875	1.14697	2.12412e-09	2.36627e-07	8.67282	MBD2//TBL1XR1//PHF15//ATXN7L3//TRIM23//CDC42//CLCN5//GALNT3//MFNG//NTRK3//SREBF2//STX5//CHST1//B4GALT3//AP1M1//SLC33A1//HS3ST2//ST6GALNAC4//ZDHHC9//RAB14//MAN1C1//ARHGAP21//NDFIP1//GYLTL1B//GOLT1A//RPL23A//FXR2//RPL13A//ATP6V1H//ZNF238//CHEK1//PIGH//CENPB//PPP2CB//PPP2R1A//JRKL//STAG2//CBX1//RCC2//CLASP2//SEPT6//SS18L1//SUV420H2//TERF2//MYCN//TMPO//UBE2B//WAPAL//ASF1B//H2AFZ//SHPRH//TCF3//RARA//L…
GO:0043227	membrane-bounded organelle	Cellular component	611	9201	963	16875	1.16365	4.84208e-09	4.49507e-07	8.31497	MBD2//TBL1XR1//PHF15//ATXN7L3//TRIM23//CDC42//CLCN5//GALNT3//MFNG//NTRK3//SREBF2//STX5//CHST1//B4GALT3//AP1M1//SLC33A1//HS3ST2//ST6GALNAC4//ZDHHC9//RAB14//MAN1C1//ARHGAP21//NDFIP1//GYLTL1B//GOLT1A//ATP6V1H//ZNF238//CHEK1//PIGH//SS18L1//SUV420H2//TERF2//TCF3//RARA//UBE2B//LDB1//PHOX2B//WAPAL//TRIM36//SLC2A1//TBP//CBX1//CHIT1//LAMP1//LRP2//NPC1//CTSA//VPS33B//KIAA1324//MARCH8//TMEM9//ACLY//ADARB2//…
GO:0043231	intracellular membrane-bounded organelle	Cellular component	609	9191	963	16875	1.16111	8.59133e-09	6.83625e-07	8.06594	MBD2//TBL1XR1//PHF15//ATXN7L3//TRIM23//CDC42//CLCN5//GALNT3//MFNG//NTRK3//SREBF2//STX5//CHST1//B4GALT3//AP1M1//SLC33A1//HS3ST2//ST6GALNAC4//ZDHHC9//RAB14//MAN1C1//ARHGAP21//NDFIP1//GYLTL1B//GOLT1A//ATP6V1H//ZNF238//CHEK1//PIGH//SS18L1//SUV420H2//TERF2//TCF3//RARA//UBE2B//LDB1//PHOX2B//WAPAL//TRIM36//SLC2A1//TBP//CBX1//CHIT1//LAMP1//LRP2//NPC1//CTSA//VPS33B//KIAA1324//MARCH8//TMEM9//ACLY//ADARB2//…
GO:0044464	cell part	Cellular component	875	14351	963	16875	1.06842	2.22597e-08	1.41673e-06	7.65248	ABCA1//ACHE//ACLY//ACTN1//ADD1//ADD2//ADRA1B//AP2A1//ALPL//ANK1//ANXA7//APP//RHOC//ATP1A2//BAI3//HCN2//DAGLA//CACNA1D//CACNA1E//CACNB4//CAMK2G//CDC42//CFL1//CLCN5//CRK//CTNNB1//CTNND1//DGKB//DIAPH1//DMPK//HBEGF//EDA//EFNA1//EPHA2//EPB41//ESR1//FGD1//FGFR2//FRK//GABRB3//GABRE//GAP43//GNAQ//GOT2//GPR6//GPR12//GRB7//GRIA3//GRIK5//GRM3//GRM8//GUCY2D//IRAK2//KCNA6//KCND2//KCNH2//KCNJ8//KCNJ12//KCNMA1/…
GO:0005623	cell	Cellular component	875	14352	963	16875	1.06835	2.28914e-08	1.41673e-06	7.64033	ABCA1//ACHE//ACLY//ACTN1//ADD1//ADD2//ADRA1B//AP2A1//ALPL//ANK1//ANXA7//APP//RHOC//ATP1A2//BAI3//HCN2//DAGLA//CACNA1D//CACNA1E//CACNB4//CAMK2G//CDC42//CFL1//CLCN5//CRK//CTNNB1//CTNND1//DGKB//DIAPH1//DMPK//HBEGF//EDA//EFNA1//EPHA2//EPB41//ESR1//FGD1//FGFR2//FRK//GABRB3//GABRE//GAP43//GNAQ//GOT2//GPR6//GPR12//GRB7//GRIA3//GRIK5//GRM3//GRM8//GUCY2D//IRAK2//KCNA6//KCND2//KCNH2//KCNJ8//KCNJ12//KCNMA1/…
GO:0043005	neuron projection	Cellular component	60	537	963	16875	1.95792	4.56905e-07	2.54496e-05	6.34017	NEFM//NRP1//GRIA3//GRM3//KCND2//P2RX4//RGS14//NLGN1//PSD3//MINK1//SEMA4C//MYLK2//ACHE//APP//RHOC//HCN2//FKBP1A//GRIK5//PVALB//SCN2A//SNCA//SNCG//UCHL1//KATNB1//MYCBP2//NFASC//CNTNAP2//KCNJ12//LAMP1//RELN//RARA//RBM3//SCN8A//SREBF2//WFS1//TAOK2//NCDN//STRN3//DPYSL5//AQP11//RASGRF1//TSHZ3//GAP43//MAP2K1//CAD//CYP19A1//ESR1//L1CAM//ATP1A2//GIPC1//CTNNB1//MAP2//SEPT6//KCNAB2//NFIB//DIAPH1//GRM8//NRCA…
[truncated: 109 more rows]

## Sheet: down-MF
#Column "GO.ID" stands for the ID of gene ontology term
#Column "Term" stands for the name of gene ontology term
[truncated: 135 more rows]
