# Supplementary material for: miR-195-5p Regulates Hair Follicle Inductivity of Dermal Papilla Cells by Suppressing Wnt/β-Catenin Activation
Source: Biomed Res Int. 2018 Apr 22;2018:4924356. doi: 10.1155/2018/4924356 (PMC5937601; doi:10.1155/2018/4924356)
Supplement: Supplementary 5 — Table S5: KEGG analysis of target genes of differentially expressed miRNAs. [file 4924356.f5.xls]

## Sheet: up
#Column "PathwayID" stands for Pathway identifiers used in KEGG
#Column "Definition" stands for the definition of the PathwayID
#Column "OriginalWebSite"stands for The map's website,the nodes with red frame and red symbol are associated with the DE genes, green nodes have no significance
#Column "p-value"
"EASE-score" stands for the enrichment p-value of the PathwayID used EASE method, EASE Score is modified Fisher's exact probability by penalizing (subtract) the count of positive agreement by 1
"Fisher-Pvalue" stands for the enrichment p-value of the PathwayID used Fisher's exact test
"Hypergeometric-Pvalue" stands for the enrichment p-value of the PathwayID used Hypergeometric test
#Column "SelectionCounts" stands for the Count of the DE genes' entities directly associated with the listed PathwayID
#Column "SelectionSize" stands for the total number of the DE genes' entities
#Column "Count" stands for the count of the chosen background population genes' entities associated with the listed PathwayID
#Column "Size" stands for the total number of chosen background population genes' entities
#Column "FDR" stands for the false discovery rate of the PathwayID
#Column "Enrichment_Score" stands for the Enrichment Score value of the PathwayID, it equals "-log10(Pvalue)"
#Column "GENES" stands for the DE genes associated with the PathwayID
PathwayID	Definition	OriginalWebSite	Fisher-Pvalue	SelectionCounts	SelectionSize	Count	Size	FDR	Enrichment_Score	Genes
hsa05145	Toxoplasmosis - Homo sapiens (human)	http://www.genome.jp/kegg-bin/show_pathway?hsa05145+2771+2775+3310+3551+3654+3909+5602+5601+5293+8651+6774+7189	0.000385526	12	203	121	6462	0.0406488	3.41395	GNAI2//GNAO1//HSPA6//IKBKB//IRAK1//LAMA3//MAPK10//MAPK9//PIK3CD//SOCS1//STAT3//TRAF6
hsa05142	Chagas disease (American trypanosomiasis) - Homo sapiens (human)	http://www.genome.jp/kegg-bin/show_pathway?hsa05142+6352+2771+2775+3551+3654+5602+5601+5293+5332+5054+7189	0.000387069	11	203	104	6462	0.0406488	3.41221	CCL5//GNAI2//GNAO1//IKBKB//IRAK1//MAPK10//MAPK9//PIK3CD//PLCB4//SERPINE1//TRAF6
hsa04010	MAPK signaling pathway - Homo sapiens (human)	http://www.genome.jp/kegg-bin/show_pathway?hsa04010+409+783+2259+2249+2261+3310+3551+3552+4296+7786+4217+5602+5601+5534+5921+27330+6655+9344+7189	0.000463674	19	203	259	6462	0.0406488	3.33379	ARRB2//CACNB2//FGF14//FGF4//FGFR3//HSPA6//IKBKB//IL1A//MAP3K11//MAP3K12//MAP3K5//MAPK10//MAPK9//PPP3R1//RASA1//RPS6KA6//SOS2//TAOK2//TRAF6
hsa04930	Type II diabetes mellitus - Homo sapiens (human)	http://www.genome.jp/kegg-bin/show_pathway?hsa04930+3551+3667+5602+5601+5293+6517+8651	0.000670896	7	203	48	6462	0.0417577	3.17334	IKBKB//IRS1//MAPK10//MAPK9//PIK3CD//SLC2A4//SOCS1
hsa04360	Axon guidance - Homo sapiens (human)	http://www.genome.jp/kegg-bin/show_pathway?hsa04360+1808+56896+2048+2771+2932+3897+59277+5534+5921+27289+10371+6405	0.000793872	12	203	131	6462	0.0417577	3.10025	DPYSL2//DPYSL5//EPHB2//GNAI2//GSK3B//L1CAM//NTN4//PPP3R1//RASA1//RND1//SEMA3A//SEMA3F
hsa04723	Retrograde endocannabinoid signaling - Homo sapiens (human)	http://www.genome.jp/kegg-bin/show_pathway?hsa04723+2560+2771+2775+10681+2790+2915+3760+5602+5601+5332	0.00128755	10	203	102	6462	0.0488394	2.89024	GABRB1//GNAI2//GNAO1//GNB5//GNG10//GRM5//KCNJ3//MAPK10//MAPK9//PLCB4
hsa04722	Neurotrophin signaling pathway - Homo sapiens (human)	http://www.genome.jp/kegg-bin/show_pathway?hsa04722+2932+3551+3654+3667+4217+5602+5601+5293+27330+6655+7189	0.00129991	11	203	120	6462	0.0488394	2.88609	GSK3B//IKBKB//IRAK1//IRS1//MAP3K5//MAPK10//MAPK9//PIK3CD//RPS6KA6//SOS2//TRAF6
hsa04144	Endocytosis - Homo sapiens (human)	http://www.genome.jp/kegg-bin/show_pathway?hsa04144+153+160+1173+409+1759+30844+2065+2261+3310+9922+30011+7189+7251+155382+9372	0.00180384	15	203	204	6462	0.0593014	2.7438	ADRB1//AP2A1//AP2M1//ARRB2//DNM1//EHD4//ERBB3//FGFR3//HSPA6//IQSEC1//SH3KBP1//TRAF6//TSG101//VPS37D//ZFYVE9
hsa05160	Hepatitis C - Homo sapiens (human)	http://www.genome.jp/kegg-bin/show_pathway?hsa05160+5010+9451+2932+3455+3551+5602+5601+5293+6655+6774+7189	0.00296316	11	203	133	6462	0.0865901	2.52825	CLDN11//EIF2AK3//GSK3B//IFNAR2//IKBKB//MAPK10//MAPK9//PIK3CD//SOS2//STAT3//TRAF6
hsa04310	Wnt signaling pathway - Homo sapiens (human)	http://www.genome.jp/kegg-bin/show_pathway?hsa04310+25805+23002+8325+2932+5602+5601+5332+5534+144165+6423+81839	0.00516437	11	203	143	6462	0.135823	2.28698	BAMBI//DAAM1//FZD8//GSK3B//MAPK10//MAPK9//PLCB4//PPP3R1//PRICKLE1//SFRP2//VANGL1
hsa04062	Chemokine signaling pathway - Homo sapiens (human)	http://www.genome.jp/kegg-bin/show_pathway?hsa04062+409+6346+6352+2771+10681+2790+2932+3551+4067+5293+5332+6655+6774	0.00605485	13	203	188	6462	0.143886	2.2179	ARRB2//CCL1//CCL5//GNAI2//GNB5//GNG10//GSK3B//IKBKB//LYN//PIK3CD//PLCB4//SOS2//STAT3
hsa05014	Amyotrophic lateral sclerosis (ALS) - Homo sapiens (human)	http://www.genome.jp/kegg-bin/show_pathway?hsa05014+57679+847+4217+4747+4741+5534	0.00656514	6	203	54	6462	0.143886	2.18276	ALS2//CAT//MAP3K5//NEFL//NEFM//PPP3R1
hsa04728	Dopaminergic synapse - Homo sapiens (human)	http://www.genome.jp/kegg-bin/show_pathway?hsa04728+409+2771+2775+10681+2790+2932+3760+5602+5601+5332	0.00753879	10	203	130	6462	0.150878	2.1227	ARRB2//GNAI2//GNAO1//GNB5//GNG10//GSK3B//KCNJ3//MAPK10//MAPK9//PLCB4
hsa05032	Morphine addiction - Homo sapiens (human)	http://www.genome.jp/kegg-bin/show_pathway?hsa05032+409+2560+2771+2775+10681+2790+3760+5151	0.00803152	8	203	92	6462	0.150878	2.0952	ARRB2//GABRB1//GNAI2//GNAO1//GNB5//GNG10//KCNJ3//PDE8A
hsa00533	Glycosaminoglycan biosynthesis - keratan sulfate - Homo sapiens (human)	http://www.genome.jp/kegg-bin/show_pathway?hsa00533+11041+8534+9435	0.0105127	3	203	15	6462	0.174415	1.97828	B3GNT1//CHST1//CHST2
hsa04724	Glutamatergic synapse - Homo sapiens (human)	http://www.genome.jp/kegg-bin/show_pathway?hsa04724+2771+2775+10681+2790+2913+2915+3760+5332+5534	0.0110263	9	203	117	6462	0.174415	1.95757	GNAI2//GNAO1//GNB5//GNG10//GRM3//GRM5//KCNJ3//PLCB4//PPP3R1
hsa04910	Insulin signaling pathway - Homo sapiens (human)	http://www.genome.jp/kegg-bin/show_pathway?hsa04910+2932+3551+3667+5602+5601+5293+6517+8651+6655+9322	0.0112739	10	203	138	6462	0.174415	1.94792	GSK3B//IKBKB//IRS1//MAPK10//MAPK9//PIK3CD//SLC2A4//SOCS1//SOS2//TRIP10
hsa04620	Toll-like receptor signaling pathway - Homo sapiens (human)	http://www.genome.jp/kegg-bin/show_pathway?hsa04620+6352+3455+3551+3654+5602+5601+5293+7189	0.0179612	8	203	106	6462	0.262434	1.74566	CCL5//IFNAR2//IKBKB//IRAK1//MAPK10//MAPK9//PIK3CD//TRAF6
hsa04920	Adipocytokine signaling pathway - Homo sapiens (human)	http://www.genome.jp/kegg-bin/show_pathway?hsa04920+3551+3667+5602+5601+6517+6774	0.0207128	6	203	69	6462	0.277701	1.68376	IKBKB//IRS1//MAPK10//MAPK9//SLC2A4//STAT3
hsa04380	Osteoclast differentiation - Homo sapiens (human)	http://www.genome.jp/kegg-bin/show_pathway?hsa04380+3455+3551+3552+5602+5601+5293+5534+8651+7189	0.023709	9	203	133	6462	0.277701	1.62509	IFNAR2//IKBKB//IL1A//MAPK10//MAPK9//PIK3CD//PPP3R1//SOCS1//TRAF6
hsa05169	Epstein-Barr virus infection - Homo sapiens (human)	http://www.genome.jp/kegg-bin/show_pathway?hsa05169+9451+2932+3310+3551+3654+4067+5602+5601+9612+5293+6774+7189	0.0240182	12	203	201	6462	0.277701	1.61946	EIF2AK3//GSK3B//HSPA6//IKBKB//IRAK1//LYN//MAPK10//MAPK9//NCOR2//PIK3CD//STAT3//TRAF6
hsa05164	Influenza A - Homo sapiens (human)	http://www.genome.jp/kegg-bin/show_pathway?hsa05164+6352+9451+2932+3310+3455+3551+3552+3838+5602+5601+5293	0.0240653	11	203	178	6462	0.277701	1.61861	CCL5//EIF2AK3//GSK3B//HSPA6//IFNAR2//IKBKB//IL1A//KPNA2//MAPK10//MAPK9//PIK3CD
hsa05162	Measles - Homo sapiens (human)	http://www.genome.jp/kegg-bin/show_pathway?hsa05162+9451+2932+3310+3455+3552+3654+5293+6774+7189	0.0247492	9	203	134	6462	0.277701	1.60644	EIF2AK3//GSK3B//HSPA6//IFNAR2//IL1A//IRAK1//PIK3CD//STAT3//TRAF6
hsa04726	Serotonergic synapse - Homo sapiens (human)	http://www.genome.jp/kegg-bin/show_pathway?hsa04726+351+2560+2771+2775+10681+2790+3760+5332	0.0253415	8	203	113	6462	0.277701	1.59617	APP//GABRB1//GNAI2//GNAO1//GNB5//GNG10//KCNJ3//PLCB4
hsa05133	Pertussis - Homo sapiens (human)	http://www.genome.jp/kegg-bin/show_pathway?hsa05133+2771+3552+3654+5602+5601+7189	0.0298453	6	203	75	6462	0.305758	1.52512	GNAI2//IL1A//IRAK1//MAPK10//MAPK9//TRAF6
hsa04713	Circadian entrainment - Homo sapiens (human)	http://www.genome.jp/kegg-bin/show_pathway?hsa04713+2771+2775+10681+2790+3760+5332+51655	0.0308007	7	203	96	6462	0.305758	1.51144	GNAI2//GNAO1//GNB5//GNG10//KCNJ3//PLCB4//RASD1
hsa04662	B cell receptor signaling pathway - Homo sapiens (human)	http://www.genome.jp/kegg-bin/show_pathway?hsa04662+2932+3551+4067+5293+5534+6655	0.0315878	6	203	76	6462	0.305758	1.50048	GSK3B//IKBKB//LYN//PIK3CD//PPP3R1//SOS2
hsa04621	NOD-like receptor signaling pathway - Homo sapiens (human)	http://www.genome.jp/kegg-bin/show_pathway?hsa04621+6352+3551+5602+5601+7189	0.0325522	5	203	57	6462	0.305758	1.48742	CCL5//IKBKB//MAPK10//MAPK9//TRAF6
hsa04141	Protein processing in endoplasmic reticulum - Homo sapiens (human)	http://www.genome.jp/kegg-bin/show_pathway?hsa04141+51009+9451+3310+10960+4217+5602+5601+55666+10484+7991	0.0370043	10	203	167	6462	0.330043	1.43175	DERL2//EIF2AK3//HSPA6//LMAN2//MAP3K5//MAPK10//MAPK9//NPLOC4//SEC23A//TUSC3
hsa04142	Lysosome - Homo sapiens (human)	http://www.genome.jp/kegg-bin/show_pathway?hsa04142+1176+5476+9583+138050+9741+4074+51172+6556	0.0376475	8	203	122	6462	0.330043	1.42426	AP3S1//CTSA//ENTPD4//HGSNAT//LAPTM4A//M6PR//NAGPA//SLC11A1
hsa04150	mTOR signaling pathway - Homo sapiens (human)	http://www.genome.jp/kegg-bin/show_pathway?hsa04150+54541+3551+3667+5293+27330	0.0394088	5	203	60	6462	0.333735	1.40441	DDIT4//IKBKB//IRS1//PIK3CD//RPS6KA6
hsa04151	PI3K-Akt signaling pathway - Homo sapiens (human)	http://www.genome.jp/kegg-bin/show_pathway?hsa04151+1285+54541+2259+2249+2261+10681+2790+2932+3455+3551+3667+3696+3909+5293+5649+6655+7148	0.0418353	17	203	344	6462	0.333735	1.37846	COL4A3//DDIT4//FGF14//FGF4//FGFR3//GNB5//GNG10//GSK3B//IFNAR2//IKBKB//IRS1//ITGB8//LAMA3//PIK3CD//RELN//SOS2//TNXB
hsa04730	Long-term depression - Homo sapiens (human)	http://www.genome.jp/kegg-bin/show_pathway?hsa04730+2771+2775+2915+4067+5332	0.0418755	5	203	61	6462	0.333735	1.37804	GNAI2//GNAO1//GRM5//LYN//PLCB4

## Sheet: down
#Column "PathwayID" stands for Pathway identifiers used in KEGG
#Column "Definition" stands for the definition of the PathwayID
#Column "OriginalWebSite"stands for The map's website,the nodes with red frame and red symbol are associated with the DE genes, green nodes have no significance
#Column "p-value"
"EASE-score" stands for the enrichment p-value of the PathwayID used EASE method, EASE Score is modified Fisher's exact probability by penalizing (subtract) the count of positive agreement by 1
"Fisher-Pvalue" stands for the enrichment p-value of the PathwayID used Fisher's exact test
"Hypergeometric-Pvalue" stands for the enrichment p-value of the PathwayID used Hypergeometric test
#Column "SelectionCounts" stands for the Count of the DE genes' entities directly associated with the listed PathwayID
#Column "SelectionSize" stands for the total number of the DE genes' entities
#Column "Count" stands for the count of the chosen background population genes' entities associated with the listed PathwayID
#Column "Size" stands for the total number of chosen background population genes' entities
#Column "FDR" stands for the false discovery rate of the PathwayID
#Column "Enrichment_Score" stands for the Enrichment Score value of the PathwayID, it equals "-log10(Pvalue)"
#Column "GENES" stands for the DE genes associated with the PathwayID
PathwayID	Definition	OriginalWebSite	Fisher-Pvalue	SelectionCounts	SelectionSize	Count	Size	FDR	Enrichment_Score	Genes
hsa04010	MAPK signaling pathway - Homo sapiens (human)	http://www.genome.jp/kegg-bin/show_pathway?hsa04010+776+777+785+786+998+1398+1399+80824+1844+1847+1852+2263+1647+4616+3551+3552+5604+4214+4296+9175+10746+5595+2872+22808+51701+5533+5536+5921+5923+5970+6654+9344+51347+7189	1.40479e-05	34	393	259	6462	0.00369459	4.85239	CACNA1D//CACNA1E//CACNB4//CACNG1//CDC42//CRK//CRKL//DUSP16//DUSP2//DUSP5//DUSP9//FGFR2//GADD45A//GADD45B//IKBKB//IL1A//MAP2K1//MAP3K1//MAP3K11//MAP3K13//MAP3K2//MAPK3//MKNK2//MRAS//NLK//PPP3CC//PPP5C//RASA1//RASGRF1//RELA//SOS1//TAOK2//TAOK3//TRAF6
hsa04360	Axon guidance - Homo sapiens (human)	http://www.genome.jp/kegg-bin/show_pathway?hsa04360+998+1072+56896+1942+1969+285220+3897+5595+4775+8829+22854+5063+5533+5747+5921+223117+54910+10505+57715+54437+80031	3.56564e-05	21	393	131	6462	0.00468882	4.44786	CDC42//CFL1//DPYSL5//EFNA1//EPHA2//EPHA6//L1CAM//MAPK3//NFATC3//NRP1//NTNG1//PAK3//PPP3CC//PTK2//RASA1//SEMA3D//SEMA4C//SEMA4F//SEMA4G//SEMA5B//SEMA6D
hsa05211	Renal cell carcinoma - Homo sapiens (human)	http://www.genome.jp/kegg-bin/show_pathway?hsa05211+369+998+1398+1399+8453+54583+5604+5595+5063+9978+6513+6654+7422	0.000135733	13	393	66	6462	0.0118992	3.86732	ARAF//CDC42//CRK//CRKL//CUL2//EGLN1//MAP2K1//MAPK3//PAK3//RBX1//SLC2A1//SOS1//VEGFA
hsa05221	Acute myeloid leukemia - Homo sapiens (human)	http://www.genome.jp/kegg-bin/show_pathway?hsa05221+369+3551+5604+5595+11040+5914+5970+862+6654+83439+6934	0.000531842	11	393	57	6462	0.0349686	3.27422	ARAF//IKBKB//MAP2K1//MAPK3//PIM2//RARA//RELA//RUNX1T1//SOS1//TCF7L1//TCF7L2
hsa05200	Pathways in cancer - Homo sapiens (human)	http://www.genome.jp/kegg-bin/show_pathway?hsa05200+369+898+998+1285+1398+1399+1499+8453+54583+2263+8326+2735+64399+3551+3576+3909+5604+5595+5747+5900+5914+9978+5970+862+6513+6654+83439+6934+7170+9618+7189+7422+89780+7476	0.00133032	34	393	327	6462	0.0661881	2.87604	ARAF//CCNE1//CDC42//COL4A3//CRK//CRKL//CTNNB1//CUL2//EGLN1//FGFR2//FZD9//GLI1//HHIP//IKBKB//IL8//LAMA3//MAP2K1//MAPK3//PTK2//RALGDS//RARA//RBX1//RELA//RUNX1T1//SLC2A1//SOS1//TCF7L1//TCF7L2//TPM3//TRAF4//TRAF6//VEGFA//WNT3A//WNT7A
hsa04120	Ubiquitin mediated proteolysis - Homo sapiens (human)	http://www.genome.jp/kegg-bin/show_pathway?hsa04120+8697+8453+55294+8925+4214+27339+9978+64326+6477+8651+7189+9320+7320+7324+7325+7328+7334+22888	0.00151	18	393	137	6462	0.0661881	2.82102	CDC23//CUL2//FBXW7//HERC1//MAP3K1//PRPF19//RBX1//RFWD2//SIAH1//SOCS1//TRAF6//TRIP12//UBE2B//UBE2E1//UBE2E2//UBE2H//UBE2N//UBOX5
hsa04310	Wnt signaling pathway - Homo sapiens (human)	http://www.genome.jp/kegg-bin/show_pathway?hsa04310+25805+818+1499+8326+4040+4775+85407+51701+5533+9978+6477+64321+79718+83439+6934+81839+89780+7476	0.00245627	18	393	143	6462	0.0894516	2.60973	BAMBI//CAMK2G//CTNNB1//FZD9//LRP6//NFATC3//NKD1//NLK//PPP3CC//RBX1//SIAH1//SOX17//TBL1XR1//TCF7L1//TCF7L2//VANGL1//WNT3A//WNT7A
hsa05202	Transcriptional misregulation in cancer - Homo sapiens (human)	http://www.genome.jp/kegg-bin/show_pathway?hsa05202+604+905+1655+2313+2892+3206+3576+8861+4211+4291+4297+4613+5327+5546+5747+5914+5970+862+8148+6929+30012	0.00286712	21	393	180	6462	0.0894516	2.54256	BCL6//CCNT2//DDX5//FLI1//GRIA3//HOXA10//IL8//LDB1//MEIS1//MLF1//MLL//MYCN//PLAT//PRCC//PTK2//RARA//RELA//RUNX1T1//TAF15//TCF3//TLX3
hsa04510	Focal adhesion - Homo sapiens (human)	http://www.genome.jp/kegg-bin/show_pathway?hsa04510+87+81+998+1285+1398+1399+1499+1729+3909+5604+5595+10398+85366+5063+5747+5923+5649+6654+7057+83660+7143+7422+7791	0.00306108	23	393	205	6462	0.0894516	2.51412	ACTN1//ACTN4//CDC42//COL4A3//CRK//CRKL//CTNNB1//DIAPH1//LAMA3//MAP2K1//MAPK3//MYL9//MYLK2//PAK3//PTK2//RASGRF1//RELN//SOS1//THBS1//TLN2//TNR//VEGFA//ZYX
hsa04520	Adherens junction - Homo sapiens (human)	http://www.genome.jp/kegg-bin/show_pathway?hsa04520+87+81+998+1499+1500+5595+51701+5770+117178+83439+6934	0.00427506	11	393	73	6462	0.112434	2.36906	ACTN1//ACTN4//CDC42//CTNNB1//CTNND1//MAPK3//NLK//PTPN1//SSX2IP//TCF7L1//TCF7L2
hsa04390	Hippo signaling pathway - Homo sapiens (human)	http://www.genome.jp/kegg-bin/show_pathway?hsa04390+154796+27113+1499+8326+8200+9113+26524+85407+5516+5518+83439+6934+7005+89780+7476+23286+10413+10971	0.00585958	18	393	155	6462	0.140097	2.23213	AMOT//BBC3//CTNNB1//FZD9//GDF5//LATS1//LATS2//NKD1//PPP2CB//PPP2R1A//TCF7L1//TCF7L2//TEAD3//WNT3A//WNT7A//WWC1//YAP1//YWHAQ
hsa05216	Thyroid cancer - Homo sapiens (human)	http://www.genome.jp/kegg-bin/show_pathway?hsa05216+1499+5604+5595+83439+6934+7170	0.00699475	6	393	29	6462	0.153302	2.15523	CTNNB1//MAP2K1//MAPK3//TCF7L1//TCF7L2//TPM3
hsa04330	Notch signaling pathway - Homo sapiens (human)	http://www.genome.jp/kegg-bin/show_pathway?hsa04330+6868+51107+28514+3280+4242+9612+9253+55851	0.00768506	8	393	48	6462	0.155475	2.11435	ADAM17//APH1A//DLL1//HES1//MFNG//NCOR2//NUMBL//PSENEN
hsa04350	TGF-beta signaling pathway - Homo sapiens (human)	http://www.genome.jp/kegg-bin/show_pathway?hsa04350+25805+1875+8200+3624+10637+5595+5516+5518+9978+4092+7057	0.00942998	11	393	81	6462	0.177149	2.02549	BAMBI//E2F5//GDF5//INHBA//LEFTY1//MAPK3//PPP2CB//PPP2R1A//RBX1//SMAD7//THBS1
hsa05131	Shigellosis - Homo sapiens (human)	http://www.genome.jp/kegg-bin/show_pathway?hsa05131+10095+998+1398+1399+1729+3551+3576+5595+5970	0.0107607	9	393	61	6462	0.188672	1.96816	ARPC1B//CDC42//CRK//CRKL//DIAPH1//IKBKB//IL8//MAPK3//RELA
hsa05412	Arrhythmogenic right ventricular cardiomyopathy (ARVC) - Homo sapiens (human)	http://www.genome.jp/kegg-bin/show_pathway?hsa05412+87+81+488+776+785+786+1499+1674+83439+6934	0.0134641	10	393	74	6462	0.211772	1.87082	ACTN1//ACTN4//ATP2A2//CACNA1D//CACNB4//CACNG1//CTNNB1//DES//TCF7L1//TCF7L2
hsa04722	Neurotrophin signaling pathway - Homo sapiens (human)	http://www.genome.jp/kegg-bin/show_pathway?hsa04722+818+814+998+1398+1399+3551+3656+5604+4214+5595+4916+5970+6654+7189	0.0136887	14	393	120	6462	0.211772	1.86364	CAMK2G//CAMK4//CDC42//CRK//CRKL//IKBKB//IRAK2//MAP2K1//MAP3K1//MAPK3//NTRK3//RELA//SOS1//TRAF6
hsa05217	Basal cell carcinoma - Homo sapiens (human)	http://www.genome.jp/kegg-bin/show_pathway?hsa05217+1499+8326+2735+64399+83439+6934+89780+7476	0.017142	8	393	55	6462	0.230497	1.76594	CTNNB1//FZD9//GLI1//HHIP//TCF7L1//TCF7L2//WNT3A//WNT7A
hsa04110	Cell cycle - Homo sapiens (human)	http://www.genome.jp/kegg-bin/show_pathway?hsa04110+898+8697+993+1028+1111+1875+1647+4616+4172+9978+10735+7272+7465+10971	0.0178606	14	393	124	6462	0.230497	1.7481	CCNE1//CDC23//CDC25A//CDKN1C//CHEK1//E2F5//GADD45A//GADD45B//MCM3//RBX1//STAG2//TTK//WEE1//YWHAQ
hsa05215	Prostate cancer - Homo sapiens (human)	http://www.genome.jp/kegg-bin/show_pathway?hsa05215+369+898+1499+2263+3551+5604+5595+5970+6654+83439+6934	0.0184283	11	393	89	6462	0.230497	1.73451	ARAF//CCNE1//CTNNB1//FGFR2//IKBKB//MAP2K1//MAPK3//RELA//SOS1//TCF7L1//TCF7L2
hsa04810	Regulation of actin cytoskeleton - Homo sapiens (human)	http://www.genome.jp/kegg-bin/show_pathway?hsa04810+10152+87+81+369+50649+10095+998+1072+1398+1399+1729+2245+2263+5604+5595+22808+10398+85366+5063+5747+6654	0.0187655	21	393	213	6462	0.230497	1.72664	ABI2//ACTN1//ACTN4//ARAF//ARHGEF4//ARPC1B//CDC42//CFL1//CRK//CRKL//DIAPH1//FGD1//FGFR2//MAP2K1//MAPK3//MRAS//MYL9//MYLK2//PAK3//PTK2//SOS1
hsa04370	VEGF signaling pathway - Homo sapiens (human)	http://www.genome.jp/kegg-bin/show_pathway?hsa04370+998+5604+5595+4775+5533+5747+9047+56848+7422	0.0192811	9	393	67	6462	0.230497	1.71487	CDC42//MAP2K1//MAPK3//NFATC3//PPP3CC//PTK2//SH2D2A//SPHK2//VEGFA
hsa04115	p53 signaling pathway - Homo sapiens (human)	http://www.genome.jp/kegg-bin/show_pathway?hsa04115+27113+898+1111+1647+4616+64326+27244+6477+7057	0.0210743	9	393	68	6462	0.23495	1.67625	BBC3//CCNE1//CHEK1//GADD45A//GADD45B//RFWD2//SESN1//SIAH1//THBS1
hsa00564	Glycerophospholipid metabolism - Homo sapiens (human)	http://www.genome.jp/kegg-bin/show_pathway?hsa00564+43+10554+1607+55224+9468+162466+23761+50487+23646+10908+8611	0.0214403	11	393	91	6462	0.23495	1.66877	ACHE//AGPAT1//DGKB//ETNK2//PCYT1B//PHOSPHO1//PISD//PLA2G3//PLD3//PNPLA6//PPAP2A
hsa05219	Bladder cancer - Homo sapiens (human)	http://www.genome.jp/kegg-bin/show_pathway?hsa05219+369+3576+5604+5595+7057+7422	0.0256777	6	393	38	6462	0.27013	1.59044	ARAF//IL8//MAP2K1//MAPK3//THBS1//VEGFA
hsa04622	RIG-I-like receptor signaling pathway - Homo sapiens (human)	http://www.genome.jp/kegg-bin/show_pathway?hsa04622+3551+3576+4214+79671+55593+5970+29110+8717+7189	0.0271707	9	393	71	6462	0.274842	1.5659	IKBKB//IL8//MAP3K1//NLRX1//OTUD5//RELA//TBK1//TRADD//TRAF6
hsa04530	Tight junction - Homo sapiens (human)	http://www.genome.jp/kegg-bin/show_pathway?hsa04530+87+81+8573+998+9073+8531+1499+2035+22808+10398+5516+5518+5872+93643	0.0324772	14	393	134	6462	0.308602	1.48842	ACTN1//ACTN4//CASK//CDC42//CLDN8//CSDA//CTNNB1//EPB41//MRAS//MYL9//PPP2CB//PPP2R1A//RAB13//TJAP1
hsa05205	Proteoglycans in cancer - Homo sapiens (human)	http://www.genome.jp/kegg-bin/show_pathway?hsa05205+286+288+369+818+998+1499+1655+2099+8326+1839+3206+3226+5604+5595+22808+5747+6654+7057+7422+89780+7476	0.0334949	21	393	226	6462	0.308602	1.47502	ANK1//ANK3//ARAF//CAMK2G//CDC42//CTNNB1//DDX5//ESR1//FZD9//HBEGF//HOXA10//HOXC10//MAP2K1//MAPK3//MRAS//PTK2//SOS1//THBS1//VEGFA//WNT3A//WNT7A
hsa05166	HTLV-I infection - Homo sapiens (human)	http://www.genome.jp/kegg-bin/show_pathway?hsa05166+8697+1111+200186+64784+1499+8326+3551+3600+4214+22808+4775+8829+5533+5902+8498+5970+6513+6908+6929+83660+94241+89780+7476+7538	0.0340284	24	393	267	6462	0.308602	1.46816	CDC23//CHEK1//CRTC2//CRTC3//CTNNB1//FZD9//IKBKB//IL15//MAP3K1//MRAS//NFATC3//NRP1//PPP3CC//RANBP1//RANBP3//RELA//SLC2A1//TBP//TCF3//TLN2//TP53INP1//WNT3A//WNT7A//ZFP36
hsa05213	Endometrial cancer - Homo sapiens (human)	http://www.genome.jp/kegg-bin/show_pathway?hsa05213+369+1499+5604+5595+6654+83439+6934	0.0365811	7	393	52	6462	0.3173	1.43674	ARAF//CTNNB1//MAP2K1//MAPK3//SOS1//TCF7L1//TCF7L2
hsa04911	Insulin secretion - Homo sapiens (human)	http://www.genome.jp/kegg-bin/show_pathway?hsa04911+116+477+776+818+2776+3778+3782+3783+6513+54795	0.0374354	10	393	87	6462	0.3173	1.42672	ADCYAP1//ATP1A2//CACNA1D//CAMK2G//GNAQ//KCNMA1//KCNN3//KCNN4//SLC2A1//TRPM4
hsa04012	ErbB signaling pathway - Homo sapiens (human)	http://www.genome.jp/kegg-bin/show_pathway?hsa04012+369+818+1398+1399+1839+5604+5595+5063+5747+6654	0.0400495	10	393	88	6462	0.3173	1.3974	ARAF//CAMK2G//CRK//CRKL//HBEGF//MAP2K1//MAPK3//PAK3//PTK2//SOS1
hsa04910	Insulin signaling pathway - Homo sapiens (human)	http://www.genome.jp/kegg-bin/show_pathway?hsa04910+369+1398+1399+3551+5604+5595+2872+5140+5255+5573+5770+6009+8651+6654	0.0402653	14	393	138	6462	0.3173	1.39507	ARAF//CRK//CRKL//IKBKB//MAP2K1//MAPK3//MKNK2//PDE3B//PHKA1//PRKAR1A//PTPN1//RHEB//SOCS1//SOS1
hsa04726	Serotonergic synapse - Homo sapiens (human)	http://www.genome.jp/kegg-bin/show_pathway?hsa04726+239+351+369+776+2562+2776+3751+5604+5595+6532+121278+7220	0.0410198	12	393	113	6462	0.3173	1.38701	ALOX12//APP//ARAF//CACNA1D//GABRB3//GNAQ//KCND2//MAP2K1//MAPK3//SLC6A4//TPH2//TRPC1
hsa05212	Pancreatic cancer - Homo sapiens (human)	http://www.genome.jp/kegg-bin/show_pathway?hsa05212+369+998+3551+5604+5595+5900+5970+7422	0.0455101	8	393	66	6462	0.341976	1.34189	ARAF//CDC42//IKBKB//MAP2K1//MAPK3//RALGDS//RELA//VEGFA
